# Supplementary material for: Shade Effect on Phenology, Fruit Yield, and Phenolic Content of Two Wild Blueberry Species in Northwestern Ontario, Canada
Source: MDPI journal article supplement (doi:10.3390/plants12244099), 2023-12-07
Supplement: s1 [file s1]

## Supplementary Materials

**Figure S1:** Vegetative phenological stages of *Vaccinium* sp. (Fournier *et al.*, 2020).

| Stage | <i>V. angustifolium</i>                                                             | <i>V. myrtilloides</i>                                                              | Identification                                                                 |
|-------|-------------------------------------------------------------------------------------|-------------------------------------------------------------------------------------|--------------------------------------------------------------------------------|
| 0     |    |    | Brown bud without other color and close                                        |
| 1     |    |    | Pink scales spread and are distinct, size increase                             |
| 2     |   |   | Bud switches from pink to green, becomes pointed, translucent, and double size |
| 3     |  |  | Leaves are discovered and bud grows longer                                     |
| 4     |  |  | Leaves are distinct and is twice as big as stage 3                             |
| 5     |  |  | Leaves separate but still curled on themselves                                 |
| 6     |  |  | Leaves are completely open                                                     |

**Figure S2:** Floral phenological stages of *Vaccinium* sp. (Fournier *et al.*, 2020).

| Stage | <i>V. angustifolium</i>                                                             | <i>V. myrtilloides</i>                                                              | Indentification                                                           |
|-------|-------------------------------------------------------------------------------------|-------------------------------------------------------------------------------------|---------------------------------------------------------------------------|
| 0     |    |    | Brown bud, small, without other colors and close                          |
| 1     |    |    | Pink coloration appers with distinction between scales and start to swell |
| 2     |   |   | Colored scales, size a third larger that stage 1                          |
| 3     |  |  | Bud starts to open, increase in size                                      |
| 4     |  |  | Bud completely open                                                       |
| 5     |  |  | Distinction between sepals and petals of flowers                          |
| 6     |  |  | First flower open                                                         |

**Figure S3:** Fruit phenological stages of *Vaccinium* sp. (Fournier *et al.*, 2020).

| Stage | <i>Vaccinium</i> sp.                                                                | Indentification                                                                        |
|-------|-------------------------------------------------------------------------------------|----------------------------------------------------------------------------------------|
| 7*    |    | Petals of flowers have fallen, the underside of the sepals stays round and not swollen |
| 8     |    | The underside of the sepals swells but does not exceed the width of the calix          |
| 9     |   | The underside of the sepals exceed the width of the calix but the fruit stays green    |
| 10    |  | Fruit is coloured from pink to purple or not completely blue                           |
| 11    |  | Fruit is blue and ripe                                                                 |

*\*Development stages of fruit follow development stages of flower.*

**Table S1:** Phenological data from tagged vegetative and reproductive shoots of *V. myrtilloides*.

| V. myrtilloides (0% Shade) |            |                                                                          |      |      |      |      |      | V. myrtilloides (30% Shade) |      |      |      |      |      |      |       | V. myrtilloides (50% Shade) |      |      |      |      |      |       |      | V. myrtilloides (80% Shade) |      |      |      |      |   |  |  |
|----------------------------|------------|--------------------------------------------------------------------------|------|------|------|------|------|-----------------------------|------|------|------|------|------|------|-------|-----------------------------|------|------|------|------|------|-------|------|-----------------------------|------|------|------|------|---|--|--|
| Date                       | Pot #      | A(V)                                                                     | B(V) | C(V) | D(R) | E(R) | F(R) | Pot #                       | A(V) | B(V) | C(V) | D(R) | E(R) | F(R) | Pot # | A(V)                        | B(V) | C(V) | D(R) | E(R) | F(R) | Pot # | A(V) | B(V)                        | C(V) | D(R) | E(R) | F(R) |   |  |  |
| 05/10/2022                 | 51         | 0                                                                        | 0    | 1    | 0    | 0    | 0    | 63                          | 0    | 0    | 0    | 0    | 0    | 0    | 75    | 1                           | 1    | 0    | 1    | 1    | 1    | 85    | 0    | 0                           | 0    | 0    | 1    | 0    |   |  |  |
|                            | 52         | 1                                                                        | 0    | 1    | 1    | 2    | 1    | 64                          | 0    | 0    | 0    | 0    | 0    | 0    | 76    | 1                           | 2    | 2    | 1    | 1    | 1    | 87    | 0    | 0                           | 0    | 0    | 0    | 0    |   |  |  |
|                            | 53         | 0                                                                        | 0    | 0    | 1    | 1    | 1    | 65                          | 0    | 0    | 0    | 0    | 0    | 0    | 77    | 0                           | 0    | 0    | 0    | 0    | 0    | 88    | 0    | 0                           | 0    | 1    | 0    | 1    |   |  |  |
|                            | 54         | 0                                                                        | 2    | 0    | 1    | 1    | 1    | 67                          | 0    | 1    | 1    | 1    | 1    | 1    | 78    | 0                           | 1    | 0    | 0    | 1    | 1    | 89    | 0    | 1                           | 0    | 1    | 0    | 0    |   |  |  |
|                            | 55         | 0                                                                        | 1    | 0    | 0    | 2    | 0    | 68                          | 2    | 1    | 2    | 2    | 1    | 1    | 79    | 0                           | 2    | 0    | 1    | 1    | 0    | 91    | 0    | 0                           | 0    | 0    | 0    | 0    |   |  |  |
|                            | 57         | 0                                                                        | 0    | 0    | 1    | 1    | 0    | 69                          | 1    | 0    | 0    | 1    | 1    | 0    | 80    | 1                           | 1    | 0    | 1    | 0    | 0    | 92    | 2    | 1                           | 0    | 1    | 1    | 1    |   |  |  |
|                            | 58         | 0                                                                        | 0    | 0    | 0    | 0    | 1    | 70                          | 1    | 0    | 1    | 1    | 0    | 0    | 82    | 0                           | 0    | 0    | 1    | 0    | 1    | 93    | 2    | 2                           | 2    | 1    | 0    | 0    |   |  |  |
|                            | 60         | 0                                                                        | 1    | 0    | 2    | 2    | 3    | 71                          | 0    | 0    | 1    | 1    | 0    | 1    | 83    | 0                           | 0    | 0    | 0    | 0    | 0    | 94    | 0    | 0                           | 0    | 0    | 0    | 1    |   |  |  |
|                            | 61         | 1                                                                        | 0    | 0    | 1    | 2    | 0    | 72                          | 0    | 1    | 0    | 2    | 2    | 1    | 84    | 0                           | 0    | 0    | 0    | 1    | 0    | 1     | 95   | 0                           | 0    | 0    | 0    | 0    | 0 |  |  |
|                            | 62         | 0                                                                        | 0    | 0    | 0    | 1    | 2    | 73                          | 0    | 1    | 1    | 1    | 1    | 2    | 86    | 1                           | 1    | 0    | 2    | 2    | 2    | 96    | 0    | 0                           | 0    | 1    | 1    | 1    |   |  |  |
|                            | 05/13/2022 | 51                                                                       | 1    | 1    | 1    | 0    | 0    | 0                           | 63   | 0    | 1    | 0    | 1    | 0    | 0     | 75                          | 1    | 2    | 0    | 2    | 2    | 2     | 85   | 2                           | 1    | 1    | 1    | 1    | 1 |  |  |
|                            |            | 52                                                                       | 1    | 1    | 2    | 1    | 2    | 2                           | 64   | 0    | 0    | 0    | 0    | 1    | 1     | 76                          | 1    | 2    | 2    | 2    | 1    | 1     | 87   | 1                           | 0    | 1    | 1    | 1    | 0 |  |  |
| 53                         |            | 1                                                                        | 1    | 0    | 2    | 2    | 2    | 65                          | 1    | 1    | 0    | 0    | 1    | 1    | 77    | 1                           | 1    | 1    | 1    | 0    | 1    | 88    | 1    | 2                           | 1    | 1    | 1    | 1    |   |  |  |
| 54                         |            | 1                                                                        | 2    | 0    | 2    | 1    | 2    | 67                          | 0    | 2    | 1    | 1    | 1    | 1    | 78    | 1                           | 1    | 1    | 1    | 1    | 1    | 89    | 0    | 1                           | 0    | 1    | 0    | 1    |   |  |  |
| 55                         |            | 1                                                                        | 2    | 1    | 0    | 4    | 2    | 68                          | 3    | 2    | 3    | 3    | 2    | 2    | 79    | 0                           | 4    | 1    | 1    | 1    | 0    | 91    | 0    | 0                           | 0    | 0    | 0    | 0    |   |  |  |
| 57                         |            | 1                                                                        | 2    | 1    | 1    | 1    | 1    | 69                          | 1    | 0    | 1    | 1    | 1    | 1    | 80    | 1                           | 1    | 0    | 2    | 1    | 0    | 92    | 2    | 2                           | 1    | 1    | 1    | 1    |   |  |  |
| 58                         |            | 1                                                                        | 0    | 1    | 1    | 1    | 1    | 70                          | 1    | 2    | 1    | 2    | 1    | 1    | 82    | 1                           | 1    | 1    | 1    | 0    | 1    | 93    | 2    | 2                           | 2    | 1    | 1    | 1    |   |  |  |
| 60                         |            | 1                                                                        | 1    | 2    | 3    | 3    | 4    | 71                          | 0    | 0    | 1    | 2    | 1    | 1    | 83    | 1                           | 1    | 1    | 1    | 1    | 1    | 94    | 1    | 0                           | 1    | 1    | 0    | 1    |   |  |  |
| 61                         |            | 1                                                                        | 0    | 1    | 2    | 3    | 0    | 72                          | 0    | 2    | 1    | 4    | 3    | 2    | 84    | 1                           | 1    | 1    | 2    | 1    | 3    | 95    | 1    | 0                           | 0    | 0    | 0    | 0    |   |  |  |
| 62                         |            | 0                                                                        | 0    | 0    | 1    | 2    | 3    | 73                          | 1    | 2    | 2    | 2    | 3    | 3    | 86    | 2                           | 1    | 1    | 1    | 2    | 3    | 96    | 0    | 1                           | 0    | 1    | 1    | 1    |   |  |  |
| 05/16/2022                 |            | 51                                                                       | 1    | 1    | 4    | 0    | 0    | 0                           | 63   | 0    | 1    | 0    | 1    | 0    | 0     | 75                          | 4    | 4    | 1    | 3    | 3    | 3     | 85   | 4                           | 4    | 4    | 2    | 2    | 2 |  |  |
|                            |            | 52                                                                       | 1    | 4    | 4    | 1    | 2    | 2                           | 64   | 0    | 0    | 2    | 0    | 2    | 2     | 76                          | 4    | 5    | 4    | 3    | 3    | 2     | 87   | 3                           | 0    | 4    | 2    | 2    | 1 |  |  |
|                            | 53         | 3                                                                        | 1    | 0    | 2    | 2    | 2    | 65                          | 3    | 3    | 0    | 2    | 2    | 1    | 77    | 3                           | 4    | 2    | 2    | 0    | 4    | 88    | 4    | 5                           | 4    | 3    | 2    | 3    |   |  |  |
|                            | 54         | 3                                                                        | 4    | 0    | 3    | 2    | 2    | 67                          | 0    | 2    | 3    | 2    | 2    | 2    | 78    | 3                           | 4    | 4    | 2    | 3    | 3    | 89    | 0    | 3                           | 2    | 3    | 3    | 2    |   |  |  |
|                            | 55         | 4                                                                        | 2    | 4    | 0    | 4    | 4    | 68                          | 4    | 4    | 5    | 4    | 4    | 3    | 79    | 0                           | 6    | 1    | 1    | 1    | 0    | 91    | 0    | 0                           | 0    | 0    | 0    | 0    |   |  |  |
|                            | 57         | 3                                                                        | 3    | 2    | 3    | 3    | 2    | 69                          | 3    | 0    | 4    | 2    | 1    | 1    | 80    | 3                           | 4    | 0    | 4    | 1    | 0    | 92    | 4    | 4                           | 3    | 3    | 2    | 2    |   |  |  |
|                            | 58         | 2                                                                        | 0    | 2    | 2    | 2    | 3    | 70                          | 3    | 3    | 2    | 2    | 2    | 5    | 82    | 4                           | 4    | 4    | 2    | 2    | 2    | 93    | 4    | 4                           | 4    | 3    | 3    | 2    |   |  |  |
|                            | 60         | 3                                                                        | 1    | 5    | 4    | 4    | 4    | 71                          | 0    | 0    | 1    | 2    | 4    | 1    | 83    | 4                           | 3    | 4    | 2    | 2    | 2    | 94    | 3    | 0                           | 3    | 3    | 0    | 2    |   |  |  |
|                            | 61         | 1                                                                        | 0    | 1    | 3    | 3    | 1    | 72                          | 0    | 4    | 3    | 4    | 4    | 2    | 84    | 3                           | 4    | 4    | 3    | 3    | 3    | 95    | 3    | 3                           | 4    | 0    | 3    | 0    |   |  |  |
|                            | 62         | 0                                                                        | 0    | 0    | 2    | 2    | 4    | 73                          | 3    | 4    | 4    | 4    | 4    | 4    | 86    | 4                           | 3    | 3    | 2    | 2    | 6    | 96    | 0    | 4                           | 0    | 2    | 2    | 1    |   |  |  |
|                            | 05/19/22   | 97                                                                       | 5    | 4    | 4    | 3    | 3    | 3                           | 74   | 5    | 5    | 5    | 5    | 5    | 5     | 75                          | 4    | 4    | 1    | 3    | 3    | 3     | 85   | 4                           | 4    | 4    | 3    | 3    | 3 |  |  |
|                            |            | 52                                                                       | 1    | 5    | 5    | 2    | 3    | 3                           | 64   | 0    | 0    | 3    | 0    | 3    | 3     | 76                          | 5    | 6    | 5    | 3    | 3    | 2     | 87   | 5                           | 0    | 5    | 3    | 3    | 3 |  |  |
| 53                         |            | 4                                                                        | 3    | 0    | 3    | 3    | 3    | 65                          | 4    | 4    | 0    | 3    | 3    | 3    | 77    | 5                           | 4    | 3    | 2    | 0    | 4    | 88    | 5    | 5                           | 5    | 3    | 2    | 3    |   |  |  |
| 54                         |            | 4                                                                        | 5    | 0    | 3    | 3    | 3    | 67                          | 1    | 2    | 4    | 2    | 3    | 3    | 78    | 4                           | 5    | 5    | 2    | 3    | 3    | 89    | 1    | 3                           | 3    | 3    | 3    | 3    |   |  |  |
| 55                         |            | 5                                                                        | 2    | 5    | 0    | 4    | 5    | 68                          | 5    | 5    | 6    | 4    | 4    | 4    | 79    | 0                           | 6    | 1    | 1    | 1    | 0    | 98    | 5    | 4                           | 5    | 3    | 3    | 1    |   |  |  |
| 57                         |            | 4                                                                        | 4    | 4    | 3    | 3    | 3    | 69                          | 3    | 0    | 5    | 3    | 3    | 3    | 80    | 4                           | 4    | 0    | 4    | 1    | 0    | 92    | 5    | 5                           | 4    | 3    | 2    | 2    |   |  |  |
| 58                         |            | 3                                                                        | 1    | 3    | 3    | 3    | 3    | 70                          | 3    | 3    | 3    | 3    | 3    | 6    | 82    | 4                           | 4    | 4    | 3    | 3    | 3    | 93    | 5    | 5                           | 5    | 3    | 3    | 3    |   |  |  |
| 60                         |            | 4                                                                        | 1    | 5    | 4    | 4    | 4    | 71                          | 0    | 0    | 1    | 3    | 4    | 2    | 83    | 5                           | 4    | 5    | 2    | 3    | 2    | 94    | 4    | 0                           | 4    | 3    | 0    | 3    |   |  |  |
| 61                         |            | 1                                                                        | 0    | 1    | 4    | 4    | 1    | 72                          | 0    | 5    | 4    | 4    | 4    | 2    | 84    | 4                           | 5    | 5    | 4    | 3    | 4    | 95    | 5    | 4                           | 5    | 0    | 4    | 0    |   |  |  |
| 62                         |            | 0                                                                        | 0    | 0    | 3    | 2    | 5    | 73                          | 4    | 5    | 4    | 4    | 4    | 4    | 86    | 5                           | 4    | 5    | 3    | 3    | 6    | 96    | 0    | 5                           | 0    | 3    | 2    | 2    |   |  |  |
| 05/19/22                   |            | NOTES: Changed 63 for 74(all veg); Changed 51 for 97; changed 91 for 98. |      |      |      |      |      |                             |      |      |      |      |      |      |       |                             |      |      |      |      |      |       |      |                             |      |      |      |      |   |  |  |
| 05/22/22                   |            | 97                                                                       | 6    | 6    | 6    | 4    | 4    | 4                           | 74   | 6    | 5    | 6    | 6    | 6    | 6     | 75                          | 5    | 5    | 1    | 4    | 4    | 4     | 85   | 5                           | 5    | 5    | 3    | 3    | 3 |  |  |
|                            | 52         | 1                                                                        | 6    | 6    | 3    | 4    | 3    | 64                          | 0    | 0    | 5    | 0    | 3    | 3    | 76    | 6                           | 6    | 6    | 3    | 3    | 3    | 87    | 5    | 0                           | 5    | 3    | 3    | 3    |   |  |  |
|                            | 53         | 4                                                                        | 4    | 0    | 3    | 4    | 3    | 65                          | 4    | 4    | 0    | 3    | 3    | 3    | 77    | 5                           | 5    | 3    | 3    | 0    | 4    | 88    | 5    | 5                           | 5    | 4    | 2    | 4    |   |  |  |
|                            | 54         | 6                                                                        | 6    | 0    | 4    | 4    | 4    | 67                          | 3    | 2    | 5    | 3    | 3    | 3    | 78    | 5                           | 5    | 5    | 3    | 3    | 3    | 89    | 2    | 4                           | 4    | 3    | 3    | 3    |   |  |  |
|                            | 55         | 5                                                                        | 2    | 5    | 1    | 5    | 5    | 68                          | 6    | 6    | 6    | 4    | 4    | 4    | 79    | 0                           | 6    | 1    | 1    | 1    | 0    | 98    | 5    | 4                           | 5    | 3    | 3    | 5    |   |  |  |
|                            | 57         | 5                                                                        | 5    | 5    | 3    | 3    | 3    | 69                          | 4    | 0    | 5    | 3    | 3    | 3    | 80    | 4                           | 5    | 0    | 4    | 1    | 0    | 92    | 5    | 5                           | 5    | 4    | 3    | 3    |   |  |  |
|                            | 58         | 4                                                                        | 1    | 5    | 3    | 3    | 4    | 70                          | 4    | 4    | 4    | 5    | 4    | 6    | 82    | 5                           | 5    | 6    | 3    | 3    | 3    | 93    | 5    | 5                           | 5    | 4    | 4    | 3    |   |  |  |
|                            | 60         | 6                                                                        | 0    | 6    | 5    | 5    | 5    | 71                          | 0    | 0    | 1    | 4    | 3    | 3    | 83    | 5                           | 5    | 5    | 3    | 3    | 3    | 94    | 4    | 0                           | 4    | 4    | 0    | 3    |   |  |  |
|                            | 61         | 1                                                                        | 0    | 1    | 4    | 4    | 1    | 72                          | 0    | 5    | 4    | 5    | 4    | 3    | 84    | 5                           | 5    | 5    | 4    | 4    | 4    | 95    | 5    | 5                           | 5    | 0    | 4    | 0    |   |  |  |
|                            | 62         | 0                                                                        | 0    | 0    | 4    | 2    | 6    | 73                          | 5    | 6    | 5    | 4    | 4    | 4    | 86    | 6                           | 6    | 6    | 3    | 3    | 6    | 96    | 0    | 5                           | 0    | 3    | 2    | 2    |   |  |  |
|                            | 05/25/2022 | 97                                                                       | 6    | 6    | 6    | 4    | 4    | 4                           | 74   | 6    | 5    | 6    | 6    | 6    | 6     | 75                          | 6    | 6    | 1    | 4    | 4    | 4     | 85   | 5                           | 5    | 5    | 3    | 3    | 3 |  |  |
|                            |            | 52                                                                       | 0    | 6    | 6    | 4    | 4    | 4                           | 64   | 0    | 0    | 5    | 0    | 4    | 4     | 76                          | 6    | 6    | 6    | 4    | 4    | 4     | 87   | 5                           | 0    | 5    | 4    | 3    | 3 |  |  |
| 53                         |            | 6                                                                        | 6    | 0    | 3    | 4    | 3    | 65                          | 5    | 6    | 0    | 4    | 4    | 4    | 77    | 5                           | 6    | 3    | 4    | 0    | 5    | 88    | 6    | 6                           | 6    | 3    | 3    | 4    |   |  |  |
| 54                         |            | 6                                                                        | 6    | 0    | 4    | 4    | 4    | 67                          | 5    | 2    | 5    | 4    | 4    | 4    | 78    | 5                           | 6    | 6    | 4    | 4    | 4    | 89    | 3    | 5                           | 5    | 4    | 3    | 3    |   |  |  |
| 55                         |            | 6                                                                        | 6    | 6    | 2    | 5    | 6    | 68                          | 6    | 6    | 6    | 5    | 5    | 5    | 79    | 0                           | 6    | 1    | 1    | 1    | 0    | 98    | 5    | 5                           | 5    | 3    | 3    | 5    |   |  |  |
| 57                         |            | 6                                                                        | 5    | 5    | 4    | 4    | 4    | 69                          | 5    | 0    | 6    | 4    | 3    | 4    | 80    | 6                           | 6    | 0    | 4    | 1    | 0    | 92    | 5    | 6                           | 5    | 4    | 3    | 3    |   |  |  |
| 58                         |            | 4                                                                        | 1    | 6    | 4    | 4    | 5    | 70                          | 6    | 5    | 5    | 5    | 4    | 6    | 82    | 6                           | 6    | 6    | 4    | 4    | 4    | 93    | 6    | 6                           | 6    | 4    | 4    | 3    |   |  |  |
| 60                         |            | 6                                                                        | 0    | 6    | 5    | 5    | 5    | 71                          | 0    | 0    | 1    | 4    | 3    | 3    | 83    | 6                           | 6    | 6    | 4    | 4    | 4    | 94    | 4    | 0                           | 6    | 5    | 0    | 3    |   |  |  |
| 61                         |            | 1                                                                        | 0    | 1    | 4    | 4    | 1    | 72                          | 0    | 6    | 5    | 5    | 5    | 4    | 84    | 5                           | 5    | 6    | 5    | 4    | 4    | 95    | 6    | 6                           | 6    | 0    | 6    | 0    |   |  |  |
| 62                         |            | 0                                                                        | 0    | 0    | 5    | 3    | 6    | 73                          | 6    | 6    | 6    | 5    | 5    | 5    | 86    | 6                           | 6    | 6    | 3    | 4    | 6    | 96    | 0    | 6                           | 0    | 4    | 3    | 3    |   |  |  |

|            |            |    |   |   |   |   |   |    |    |   |   |   |   |   |    |    |   |   |   |   |   |    |    |   |   |   |   |   |   |
|------------|------------|----|---|---|---|---|---|----|----|---|---|---|---|---|----|----|---|---|---|---|---|----|----|---|---|---|---|---|---|
| 05/28/2022 | 97         | 6  | 6 | 6 | 4 | 4 | 4 | 74 | 6  | 6 | 6 | 6 | 6 | 6 | 75 | 6  | 6 | 1 | 4 | 4 | 4 | 85 | 6  | 6 | 6 | 3 | 4 | 3 |   |
|            | 52         | 0  | 6 | 6 | 4 | 4 | 4 | 64 | 0  | 0 | 6 | 0 | 4 | 4 | 76 | 6  | 6 | 6 | 4 | 4 | 4 | 87 | 6  | 0 | 6 | 4 | 3 | 3 |   |
|            | 53         | 6  | 6 | 0 | 4 | 4 | 4 | 65 | 6  | 6 | 0 | 4 | 4 | 4 | 77 | 6  | 6 | 4 | 4 | 0 | 5 | 88 | 6  | 6 | 6 | 4 | 3 | 4 |   |
|            | 54         | 6  | 6 | 0 | 4 | 4 | 4 | 67 | 6  | 2 | 6 | 4 | 4 | 4 | 78 | 5  | 6 | 6 | 4 | 4 | 4 | 89 | 4  | 5 | 5 | 4 | 3 | 3 |   |
|            | 55         | 6  | 6 | 6 | 2 | 5 | 6 | 68 | 6  | 6 | 6 | 5 | 5 | 5 | 79 | 0  | 6 | 1 | 1 | 1 | 0 | 98 | 6  | 6 | 6 | 4 | 4 | 5 |   |
|            | 57         | 6  | 5 | 5 | 4 | 4 | 4 | 69 | 6  | 0 | 6 | 4 | 3 | 4 | 80 | 6  | 6 | 0 | 5 | 1 | 0 | 92 | 6  | 6 | 6 | 4 | 3 | 3 |   |
|            | 58         | 4  | 1 | 6 | 4 | 4 | 5 | 70 | 6  | 5 | 5 | 5 | 4 | 6 | 82 | 6  | 6 | 6 | 4 | 4 | 4 | 93 | 6  | 6 | 6 | 5 | 5 | 5 |   |
|            | 60         | 6  | 0 | 6 | 5 | 5 | 5 | 71 | 0  | 0 | 1 | 5 | 3 | 3 | 83 | 6  | 6 | 6 | 4 | 4 | 4 | 94 | 5  | 0 | 6 | 5 | 0 | 3 |   |
|            | 61         | 1  | 0 | 1 | 5 | 5 | 1 | 72 | 0  | 6 | 6 | 6 | 5 | 5 | 4  | 84 | 6 | 6 | 6 | 5 | 5 | 5  | 95 | 6 | 6 | 6 | 0 | 6 | 0 |
|            | 62         | 0  | 0 | 0 | 5 | 3 | 6 | 73 | 6  | 6 | 6 | 5 | 5 | 5 | 5  | 86 | 6 | 6 | 6 | 3 | 4 | 6  | 96 | 0 | 6 | 0 | 4 | 3 | 3 |
|            | 05/31/2022 | 97 | 6 | 6 | 6 | 5 | 5 | 5  | 74 | 6 | 6 | 6 | 6 | 6 | 6  | 75 | 6 | 6 | 1 | 4 | 4 | 5  | 85 | 6 | 6 | 6 | 4 | 5 | 4 |
|            |            | 52 | 0 | 6 | 6 | 5 | 5 | 4  | 64 | 0 | 0 | 6 | 0 | 5 | 5  | 76 | 6 | 6 | 6 | 4 | 4 | 4  | 87 | 6 | 0 | 6 | 4 | 3 | 3 |
| 53         |            | 6  | 6 | 0 | 5 | 5 | 5 | 65 | 6  | 6 | 0 | 4 | 4 | 4 | 77 | 6  | 6 | 4 | 4 | 0 | 5 | 88 | 6  | 6 | 6 | 4 | 3 | 4 |   |
| 54         |            | 6  | 6 | 0 | 4 | 4 | 4 | 67 | 6  | 2 | 6 | 4 | 4 | 4 | 78 | 5  | 6 | 6 | 4 | 5 | 5 | 89 | 4  | 5 | 5 | 5 | 4 | 4 |   |
| 55         |            | 6  | 6 | 6 | 3 | 5 | 6 | 68 | 6  | 6 | 6 | 5 | 5 | 5 | 79 | 0  | 6 | 1 | 1 | 1 | 0 | 98 | 6  | 6 | 6 | 4 | 4 | 5 |   |
| 57         |            | 6  | 6 | 6 | 5 | 5 | 5 | 69 | 6  | 0 | 6 | 5 | 4 | 4 | 80 | 6  | 6 | 0 | 5 | 1 | 0 | 92 | 6  | 6 | 6 | 5 | 3 | 3 |   |
| 58         |            | 6  | 1 | 6 | 5 | 5 | 5 | 70 | 6  | 5 | 5 | 5 | 4 | 6 | 82 | 6  | 6 | 6 | 5 | 5 | 5 | 93 | 6  | 6 | 6 | 5 | 5 | 5 |   |
| 60         |            | 6  | 0 | 6 | 6 | 5 | 5 | 71 | 0  | 0 | 1 | 5 | 3 | 5 | 83 | 6  | 6 | 6 | 4 | 4 | 4 | 94 | 6  | 0 | 6 | 6 | 0 | 5 |   |
| 61         |            | 1  | 0 | 1 | 5 | 5 | 1 | 72 | 0  | 6 | 6 | 6 | 5 | 5 | 4  | 84 | 6 | 6 | 6 | 5 | 5 | 5  | 95 | 6 | 6 | 6 | 0 | 6 | 0 |
| 62         |            | 0  | 0 | 0 | 5 | 3 | 6 | 73 | 6  | 6 | 6 | 5 | 5 | 5 | 5  | 86 | 6 | 6 | 6 | 3 | 4 | 6  | 96 | 0 | 6 | 0 | 5 | 5 | 4 |
| 06/03/2022 |            | 97 | 6 | 6 | 6 | 5 | 5 | 5  | 74 | 6 | 6 | 6 | 6 | 6 | 6  | 75 | 6 | 6 | 1 | 5 | 5 | 5  | 85 | 6 | 6 | 6 | 5 | 5 | 5 |
|            |            | 52 | 0 | 6 | 6 | 5 | 5 | 4  | 64 | 0 | 0 | 6 | 0 | 5 | 5  | 76 | 6 | 6 | 6 | 5 | 5 | 5  | 87 | 6 | 0 | 6 | 5 | 3 | 4 |
|            | 53         | 6  | 6 | 0 | 5 | 5 | 5 | 65 | 6  | 6 | 0 | 5 | 5 | 5 | 77 | 6  | 6 | 5 | 5 | 0 | 5 | 88 | 6  | 6 | 6 | 5 | 4 | 5 |   |
|            | 54         | 6  | 6 | 0 | 4 | 6 | 4 | 67 | 6  | 2 | 6 | 5 | 5 | 5 | 78 | 6  | 6 | 6 | 5 | 5 | 5 | 89 | 5  | 5 | 5 | 5 | 5 | 5 |   |
|            | 55         | 6  | 6 | 6 | 5 | 5 | 6 | 68 | 6  | 6 | 6 | 5 | 5 | 5 | 79 | 0  | 6 | 1 | 1 | 1 | 0 | 98 | 6  | 6 | 6 | 5 | 5 | 5 |   |
|            | 57         | 6  | 6 | 6 | 5 | 5 | 5 | 69 | 6  | 0 | 6 | 5 | 5 | 5 | 80 | 6  | 6 | 0 | 5 | 1 | 0 | 92 | 6  | 6 | 6 | 5 | 4 | 4 |   |
|            | 58         | 6  | 1 | 6 | 5 | 6 | 6 | 70 | 6  | 6 | 6 | 5 | 4 | 6 | 82 | 6  | 6 | 6 | 5 | 5 | 5 | 93 | 6  | 6 | 6 | 5 | 5 | 5 |   |
|            | 60         | 6  | 0 | 6 | 6 | 6 | 5 | 71 | 0  | 0 | 1 | 5 | 5 | 5 | 83 | 6  | 6 | 6 | 5 | 5 | 5 | 94 | 6  | 0 | 6 | 6 | 0 | 5 |   |
|            | 61         | 1  | 0 | 1 | 5 | 5 | 1 | 72 | 0  | 6 | 6 | 6 | 6 | 5 | 5  | 84 | 6 | 6 | 6 | 5 | 5 | 5  | 95 | 6 | 6 | 6 | 0 | 6 | 0 |
|            | 62         | 0  | 0 | 0 | 5 | 4 | 6 | 73 | 6  | 6 | 6 | 5 | 6 | 6 | 86 | 6  | 6 | 6 | 4 | 5 | 5 | 6  | 96 | 0 | 6 | 0 | 5 | 5 | 4 |
|            | 06/06/2022 | 97 | 6 | 6 | 6 | 5 | 6 | 5  | 74 | 6 | 6 | 6 | 6 | 6 | 6  | 75 | 6 | 6 | 1 | 5 | 5 | 5  | 85 | 6 | 6 | 6 | 5 | 5 | 5 |
|            |            | 52 | 0 | 6 | 6 | 5 | 5 | 5  | 64 | 0 | 0 | 6 | 0 | 5 | 5  | 76 | 6 | 6 | 6 | 5 | 5 | 5  | 87 | 6 | 0 | 6 | 5 | 3 | 4 |
| 53         |            | 6  | 6 | 0 | 5 | 6 | 5 | 65 | 6  | 6 | 0 | 5 | 5 | 5 | 77 | 6  | 6 | 6 | 5 | 0 | 5 | 88 | 6  | 6 | 6 | 5 | 4 | 5 |   |
| 54         |            | 6  | 6 | 0 | 6 | 6 | 5 | 67 | 6  | 2 | 6 | 5 | 5 | 5 | 78 | 6  | 6 | 6 | 5 | 5 | 5 | 89 | 6  | 6 | 6 | 5 | 5 | 5 |   |
| 55         |            | 6  | 6 | 6 | 5 | 6 | 6 | 68 | 6  | 6 | 6 | 6 | 6 | 5 | 79 | 0  | 6 | 1 | 1 | 1 | 0 | 98 | 6  | 6 | 6 | 5 | 5 | 5 |   |
| 57         |            | 6  | 6 | 6 | 5 | 6 | 5 | 69 | 6  | 0 | 6 | 5 | 5 | 5 | 80 | 6  | 6 | 0 | 6 | 1 | 0 | 92 | 6  | 6 | 6 | 5 | 4 | 4 |   |
| 58         |            | 6  | 1 | 6 | 5 | 6 | 6 | 70 | 6  | 6 | 6 | 5 | 5 | 6 | 82 | 6  | 6 | 6 | 5 | 5 | 5 | 93 | 6  | 6 | 6 | 6 | 5 | 5 |   |
| 60         |            | 6  | 0 | 6 | 6 | 6 | 6 | 71 | 0  | 0 | 1 | 6 | 5 | 5 | 83 | 6  | 6 | 6 | 5 | 5 | 5 | 94 | 6  | 0 | 6 | 6 | 0 | 5 |   |
| 61         |            | 1  | 0 | 1 | 6 | 6 | 1 | 72 | 0  | 6 | 6 | 6 | 6 | 6 | 5  | 84 | 6 | 6 | 6 | 6 | 6 | 6  | 95 | 6 | 6 | 6 | 0 | 6 | 0 |
| 62         |            | 0  | 0 | 0 | 6 | 5 | 6 | 73 | 6  | 6 | 6 | 6 | 6 | 6 | 86 | 6  | 6 | 6 | 5 | 5 | 6 | 96 | 0  | 6 | 0 | 5 | 5 | 4 |   |
| 06/09/2022 |            | 97 | 6 | 6 | 6 | 6 | 6 | 6  | 74 | 6 | 6 | 6 | 6 | 6 | 6  | 75 | 6 | 6 | 1 | 6 | 6 | 6  | 85 | 6 | 6 | 6 | 5 | 5 | 5 |
|            |            | 52 | 0 | 6 | 6 | 5 | 6 | 5  | 64 | 0 | 0 | 6 | 0 | 6 | 5  | 76 | 6 | 6 | 6 | 6 | 5 | 5  | 87 | 6 | 0 | 6 | 5 | 4 | 4 |
|            | 53         | 6  | 6 | 0 | 5 | 6 | 5 | 65 | 6  | 6 | 0 | 6 | 5 | 5 | 77 | 6  | 6 | 6 | 6 | 0 | 5 | 88 | 6  | 6 | 6 | 5 | 5 | 5 |   |
|            | 54         | 6  | 6 | 0 | 6 | 6 | 5 | 67 | 6  | 2 | 6 | 5 | 5 | 5 | 78 | 6  | 6 | 6 | 5 | 5 | 6 | 89 | 6  | 6 | 6 | 5 | 5 | 5 |   |
|            | 55         | 6  | 6 | 6 | 5 | 7 | 6 | 68 | 6  | 6 | 6 | 6 | 6 | 6 | 79 | 0  | 6 | 1 | 1 | 1 | 0 | 98 | 6  | 6 | 6 | 5 | 5 | 5 |   |
|            | 57         | 6  | 6 | 6 | 6 | 6 | 6 | 69 | 6  | 0 | 6 | 6 | 6 | 6 | 80 | 6  | 6 | 0 | 6 | 1 | 0 | 92 | 6  | 6 | 6 | 5 | 4 | 5 |   |
|            | 58         | 6  | 1 | 6 | 6 | 6 | 6 | 70 | 6  | 6 | 6 | 5 | 5 | 6 | 82 | 6  | 6 | 6 | 6 | 5 | 5 | 93 | 6  | 6 | 6 | 6 | 5 | 5 |   |
|            | 60         | 6  | 0 | 6 | 6 | 6 | 6 | 71 | 0  | 0 | 1 | 6 | 6 | 5 | 83 | 6  | 6 | 6 | 5 | 6 | 5 | 94 | 6  | 0 | 6 | 6 | 0 | 5 |   |
|            | 61         | 1  | 0 | 1 | 6 | 6 | 1 | 72 | 0  | 6 | 6 | 6 | 6 | 6 | 5  | 84 | 6 | 6 | 6 | 6 | 6 | 6  | 95 | 6 | 6 | 6 | 0 | 6 | 0 |
|            | 62         | 0  | 0 | 0 | 6 | 5 | 6 | 73 | 6  | 6 | 6 | 6 | 6 | 6 | 86 | 6  | 6 | 6 | 6 | 6 | 6 | 96 | 0  | 6 | 0 | 5 | 5 | 5 |   |
|            | 06/12/2022 | 97 | 6 | 6 | 6 | 6 | 6 | 6  | 74 | 6 | 6 | 6 | 6 | 6 | 6  | 75 | 6 | 6 | 1 | 6 | 6 | 6  | 85 | 6 | 6 | 6 | 6 | 6 | 6 |
|            |            | 52 | 0 | 6 | 6 | 6 | 6 | 5  | 64 | 0 | 0 | 6 | 0 | 6 | 6  | 76 | 6 | 6 | 6 | 6 | 6 | 6  | 87 | 6 | 0 | 6 | 6 | 6 | 5 |
| 53         |            | 6  | 6 | 0 | 6 | 7 | 5 | 65 | 6  | 6 | 0 | 6 | 6 | 6 | 77 | 6  | 6 | 6 | 6 | 0 | 6 | 88 | 6  | 6 | 6 | 6 | 6 | 6 |   |
| 54         |            | 6  | 6 | 0 | 6 | 6 | 6 | 67 | 6  | 2 | 6 | 6 | 6 | 5 | 78 | 6  | 6 | 6 | 6 | 6 | 6 | 89 | 6  | 6 | 6 | 6 | 6 | 6 |   |
| 55         |            | 6  | 6 | 6 | 5 | 7 | 6 | 68 | 6  | 6 | 6 | 6 | 6 | 6 | 79 | 0  | 6 | 1 | 1 | 1 | 0 | 98 | 6  | 6 | 6 | 6 | 6 | 6 |   |
| 57         |            | 6  | 6 | 6 | 6 | 6 | 6 | 69 | 6  | 0 | 6 | 6 | 6 | 6 | 80 | 6  | 6 | 0 | 6 | 1 | 0 | 92 | 6  | 6 | 6 | 6 | 5 | 6 |   |
| 58         |            | 6  | 1 | 6 | 6 | 6 | 6 | 70 | 6  | 6 | 6 | 5 | 6 | 6 | 82 | 6  | 6 | 6 | 6 | 6 | 6 | 93 | 6  | 6 | 6 | 6 | 6 | 6 |   |
| 60         |            | 6  | 0 | 6 | 6 | 6 | 6 | 71 | 0  | 0 | 1 | 6 | 6 | 5 | 83 | 6  | 6 | 6 | 6 | 6 | 5 | 94 | 6  | 0 | 6 | 6 | 0 | 6 |   |
| 61         |            | 1  | 0 | 1 | 6 | 6 | 1 | 72 | 0  | 6 | 6 | 6 | 7 | 6 | 84 | 6  | 6 | 6 | 6 | 6 | 6 | 95 | 6  | 6 | 6 | 0 | 6 | 0 |   |
| 62         |            | 0  | 0 | 0 | 7 | 6 | 6 | 7  |    |   |   |   |   |   |    |    |   |   |   |   |   |    |    |   |   |   |   |   |   |

|            |            |    |   |   |   |   |   |    |    |   |   |   |   |   |    |    |   |   |   |   |   |    |    |   |   |   |   |   |
|------------|------------|----|---|---|---|---|---|----|----|---|---|---|---|---|----|----|---|---|---|---|---|----|----|---|---|---|---|---|
| 06/18/2022 | 97         | 6  | 6 | 6 | 6 | 6 | 6 | 74 | 6  | 6 | 6 | 6 | 6 | 6 | 75 | 6  | 6 | 1 | 6 | 6 | 6 | 85 | 6  | 6 | 6 | 6 | 6 |   |
|            | 52         | 0  | 6 | 6 | 6 | 6 | 5 | 64 | 0  | 0 | 6 | 0 | 6 | 6 | 76 | 6  | 6 | 6 | 6 | 6 | 6 | 87 | 6  | 0 | 6 | 6 | 6 |   |
|            | 53         | 6  | 6 | 6 | 0 | 7 | 7 | 65 | 6  | 6 | 0 | 6 | 6 | 6 | 77 | 6  | 6 | 6 | 6 | 0 | 6 | 88 | 6  | 6 | 6 | 6 | 6 |   |
|            | 54         | 6  | 6 | 6 | 0 | 7 | 7 | 67 | 6  | 2 | 6 | 6 | 6 | 6 | 78 | 6  | 6 | 6 | 6 | 6 | 6 | 89 | 6  | 6 | 6 | 6 | 6 |   |
|            | 55         | 6  | 6 | 6 | 6 | 6 | 7 | 68 | 6  | 6 | 6 | 6 | 7 | 6 | 79 | 0  | 6 | 1 | 1 | 1 | 0 | 98 | 6  | 6 | 6 | 6 | 6 |   |
|            | 57         | 6  | 6 | 6 | 6 | 6 | 6 | 69 | 6  | 0 | 6 | 6 | 6 | 6 | 80 | 6  | 6 | 0 | 7 | 1 | 0 | 92 | 6  | 6 | 6 | 6 | 7 |   |
|            | 58         | 6  | 1 | 6 | 6 | 7 | 7 | 70 | 6  | 6 | 6 | 6 | 6 | 6 | 82 | 6  | 6 | 6 | 6 | 6 | 6 | 93 | 6  | 6 | 6 | 6 | 7 |   |
|            | 60         | 6  | 0 | 6 | 7 | 7 | 8 | 71 | 0  | 0 | 1 | 6 | 6 | 7 | 83 | 6  | 6 | 6 | 6 | 6 | 6 | 94 | 6  | 0 | 6 | 6 | 0 |   |
|            | 61         | 1  | 0 | 1 | 7 | 6 | 1 | 72 | 0  | 6 | 6 | 7 | 6 | 6 | 84 | 6  | 6 | 6 | 6 | 6 | 6 | 95 | 6  | 6 | 6 | 0 | 6 |   |
|            | 62         | 0  | 0 | 0 | 8 | 7 | 6 | 73 | 6  | 6 | 6 | 7 | 7 | 7 | 86 | 6  | 6 | 6 | 6 | 6 | 6 | 96 | 0  | 6 | 0 | 6 | 6 |   |
|            | 06/21/2022 | 97 | 6 | 6 | 6 | 7 | 7 | 7  | 74 | 6 | 6 | 6 | 6 | 6 | 6  | 75 | 6 | 6 | 1 | 7 | 7 | 7  | 85 | 6 | 6 | 6 | 6 | 6 |
|            |            | 52 | 0 | 6 | 6 | 7 | 7 | 6  | 64 | 0 | 0 | 6 | 0 | 7 | 7  | 76 | 6 | 6 | 6 | 7 | 7 | 7  | 87 | 6 | 0 | 6 | 6 | 6 |
| 53         |            | 6  | 6 | 6 | 0 | 7 | 7 | 65 | 6  | 6 | 0 | 7 | 7 | 7 | 77 | 6  | 6 | 6 | 7 | 0 | 7 | 88 | 6  | 6 | 6 | 6 | 6 |   |
| 54         |            | 6  | 6 | 6 | 0 | 7 | 7 | 67 | 6  | 2 | 6 | 6 | 6 | 7 | 78 | 6  | 6 | 6 | 7 | 7 | 7 | 89 | 6  | 6 | 6 | 6 | 6 |   |
| 55         |            | 6  | 6 | 6 | 6 | 8 | 7 | 68 | 6  | 6 | 6 | 6 | 7 | 6 | 79 | 0  | 6 | 1 | 1 | 1 | 0 | 98 | 6  | 6 | 6 | 6 | 7 |   |
| 57         |            | 6  | 6 | 6 | 6 | 8 | 8 | 7  | 69 | 6 | 0 | 6 | 7 | 7 | 80 | 6  | 6 | 0 | 8 | 1 | 0 | 92 | 6  | 6 | 6 | 6 | 7 |   |
| 58         |            | 6  | 1 | 6 | 7 | 8 | 8 | 70 | 6  | 6 | 6 | 6 | 6 | 6 | 82 | 6  | 6 | 6 | 7 | 6 | 7 | 93 | 6  | 6 | 6 | 7 | 8 |   |
| 60         |            | 6  | 0 | 6 | 8 | 8 | 8 | 71 | 0  | 0 | 1 | 8 | 7 | 8 | 83 | 6  | 6 | 6 | 7 | 7 | 6 | 94 | 6  | 0 | 6 | 6 | 0 |   |
| 61         |            | 1  | 0 | 1 | 7 | 6 | 1 | 72 | 0  | 6 | 6 | 8 | 7 | 7 | 84 | 6  | 6 | 6 | 7 | 7 | 7 | 95 | 6  | 6 | 6 | 0 | 6 |   |
| 62         |            | 0  | 0 | 0 | 8 | 7 | 6 | 73 | 6  | 6 | 6 | 8 | 8 | 8 | 86 | 6  | 6 | 6 | 6 | 6 | 6 | 96 | 0  | 6 | 0 | 7 | 6 |   |
| 06/24/2022 |            | 97 | 6 | 6 | 6 | 8 | 7 | 8  | 74 | 6 | 6 | 6 | 6 | 6 | 6  | 75 | 6 | 6 | 1 | 7 | 7 | 7  | 85 | 6 | 6 | 6 | 6 | 6 |
|            |            | 52 | 0 | 6 | 6 | 8 | 7 | 8  | 64 | 0 | 0 | 6 | 0 | 8 | 8  | 76 | 6 | 6 | 6 | 7 | 7 | 7  | 87 | 6 | 0 | 6 | 7 | 7 |
|            | 53         | 6  | 6 | 6 | 0 | 8 | 8 | 65 | 6  | 6 | 0 | 8 | 8 | 8 | 77 | 6  | 6 | 6 | 7 | 0 | 8 | 88 | 6  | 6 | 6 | 6 | 6 |   |
|            | 54         | 6  | 6 | 6 | 0 | 7 | 7 | 67 | 6  | 2 | 6 | 7 | 7 | 7 | 78 | 6  | 6 | 6 | 7 | 7 | 7 | 89 | 6  | 6 | 6 | 6 | 6 |   |
|            | 55         | 6  | 6 | 6 | 7 | 8 | 7 | 68 | 6  | 6 | 6 | 8 | 7 | 7 | 79 | 0  | 6 | 1 | 1 | 1 | 0 | 98 | 6  | 6 | 6 | 7 | 7 |   |
|            | 57         | 6  | 6 | 6 | 8 | 8 | 7 | 69 | 6  | 0 | 6 | 8 | 8 | 8 | 80 | 6  | 6 | 0 | 8 | 1 | 0 | 92 | 6  | 6 | 6 | 8 | 8 |   |
|            | 58         | 6  | 1 | 6 | 7 | 8 | 8 | 70 | 6  | 6 | 6 | 7 | 7 | 7 | 82 | 6  | 6 | 6 | 8 | 8 | 8 | 93 | 6  | 6 | 6 | 8 | 8 |   |
|            | 60         | 6  | 0 | 6 | 8 | 8 | 8 | 71 | 0  | 0 | 1 | 7 | 7 | 8 | 83 | 6  | 6 | 6 | 7 | 7 | 7 | 94 | 6  | 0 | 6 | 6 | 0 |   |
|            | 61         | 1  | 0 | 1 | 7 | 6 | 1 | 72 | 0  | 6 | 6 | 8 | 8 | 8 | 84 | 6  | 6 | 6 | 8 | 8 | 8 | 95 | 6  | 6 | 6 | 0 | 6 |   |
|            | 62         | 0  | 0 | 0 | 8 | 7 | 6 | 73 | 6  | 6 | 6 | 8 | 8 | 8 | 86 | 6  | 6 | 6 | 6 | 6 | 6 | 96 | 0  | 6 | 0 | 7 | 6 |   |
|            | 06/27/2022 | 97 | 6 | 6 | 6 | 9 | 9 | 9  | 74 | 6 | 6 | 6 | 6 | 6 | 6  | 75 | 6 | 6 | 1 | 8 | 8 | 8  | 85 | 6 | 6 | 6 | 8 | 8 |
|            |            | 52 | 0 | 6 | 6 | 9 | 9 | 9  | 64 | 0 | 0 | 6 | 0 | 9 | 9  | 76 | 6 | 6 | 6 | 9 | 9 | 8  | 87 | 6 | 0 | 6 | 8 | 8 |
| 53         |            | 6  | 6 | 6 | 0 | 9 | 9 | 65 | 6  | 6 | 0 | 9 | 9 | 9 | 77 | 6  | 6 | 6 | 8 | 0 | 9 | 88 | 6  | 6 | 6 | 8 | 7 |   |
| 54         |            | 6  | 6 | 6 | 0 | 9 | 8 | 9  | 67 | 6 | 2 | 6 | 7 | 7 | 7  | 78 | 6 | 6 | 6 | 8 | 9 | 8  | 89 | 6 | 6 | 6 | 6 | 6 |
| 55         |            | 6  | 6 | 6 | 6 | 9 | 9 | 8  | 68 | 6 | 6 | 6 | 9 | 9 | 9  | 79 | 0 | 6 | 1 | 1 | 1 | 0  | 98 | 6 | 6 | 6 | 8 | 8 |
| 57         |            | 6  | 6 | 6 | 6 | 9 | 9 | 9  | 69 | 6 | 0 | 6 | 9 | 9 | 9  | 80 | 6 | 6 | 0 | 9 | 1 | 0  | 92 | 6 | 6 | 6 | 9 | 9 |
| 58         |            | 6  | 1 | 6 | 9 | 9 | 9 | 70 | 6  | 6 | 6 | 8 | 8 | 8 | 82 | 6  | 6 | 6 | 9 | 9 | 9 | 93 | 6  | 6 | 6 | 9 | 9 |   |
| 60         |            | 6  | 0 | 6 | 9 | 9 | 9 | 71 | 0  | 0 | 1 | 9 | 8 | 9 | 83 | 6  | 6 | 6 | 9 | 9 | 9 | 94 | 6  | 0 | 6 | 6 | 0 |   |
| 61         |            | 1  | 0 | 1 | 8 | 6 | 1 | 72 | 0  | 6 | 6 | 9 | 9 | 9 | 84 | 6  | 6 | 6 | 9 | 9 | 9 | 95 | 6  | 6 | 6 | 0 | 6 |   |
| 62         |            | 0  | 0 | 0 | 9 | 8 | 6 | 73 | 6  | 6 | 6 | 9 | 9 | 9 | 86 | 6  | 6 | 6 | 6 | 6 | 6 | 96 | 0  | 6 | 0 | 8 | 8 |   |
| 06/30/2022 |            | 97 | 6 | 6 | 6 | 9 | 9 | 9  | 74 | 6 | 6 | 6 | 6 | 6 | 6  | 75 | 6 | 6 | 1 | 9 | 9 | 9  | 85 | 6 | 6 | 6 | 9 | 9 |
|            |            | 52 | 0 | 6 | 6 | 9 | 9 | 9  | 64 | 0 | 0 | 6 | 0 | 9 | 9  | 76 | 6 | 6 | 6 | 9 | 9 | 9  | 87 | 6 | 0 | 6 | 9 | 9 |
|            | 53         | 6  | 6 | 6 | 0 | 9 | 9 | 65 | 6  | 6 | 0 | 9 | 9 | 9 | 77 | 6  | 6 | 6 | 9 | 0 | 9 | 88 | 6  | 6 | 6 | 9 | 8 |   |
|            | 54         | 6  | 6 | 6 | 0 | 9 | 9 | 9  | 67 | 6 | 2 | 6 | 8 | 8 | 8  | 78 | 6 | 6 | 6 | 9 | 9 | 9  | 89 | 6 | 6 | 6 | 6 | 6 |
|            | 55         | 6  | 6 | 6 | 6 | 9 | 9 | 9  | 68 | 6 | 6 | 6 | 9 | 9 | 9  | 79 | 0 | 6 | 1 | 1 | 1 | 0  | 98 | 6 | 6 | 6 | 8 | 8 |
|            | 57         | 6  | 6 | 6 | 6 | 9 | 9 | 9  | 69 | 6 | 0 | 6 | 9 | 9 | 9  | 80 | 6 | 6 | 0 | 9 | 1 | 0  | 92 | 6 | 6 | 6 | 9 | 9 |
|            | 58         | 6  | 1 | 6 | 9 | 9 | 9 | 70 | 6  | 6 | 6 | 9 | 9 | 9 | 82 | 6  | 6 | 6 | 9 | 9 | 9 | 93 | 6  | 6 | 6 | 9 | 9 |   |
|            | 60         | 6  | 0 | 6 | 9 | 9 | 9 | 71 | 0  | 0 | 1 | 9 | 9 | 9 | 83 | 6  | 6 | 6 | 9 | 9 | 9 | 94 | 6  | 0 | 6 | 6 | 0 |   |
|            | 61         | 1  | 0 | 1 | 8 | 6 | 1 | 72 | 0  | 6 | 6 | 9 | 9 | 9 | 84 | 6  | 6 | 6 | 9 | 9 | 9 | 95 | 6  | 6 | 6 | 0 | 6 |   |
|            | 62         | 0  | 0 | 0 | 9 | 8 | 6 | 73 | 6  | 6 | 6 | 9 | 9 | 9 | 86 | 6  | 6 | 6 | 6 | 6 | 6 | 96 | 0  | 6 | 0 | 8 | 8 |   |
|            | 07/03/2022 | 97 | 6 | 6 | 6 | 9 | 9 | 9  | 74 | 6 | 6 | 6 | 6 | 6 | 6  | 75 | 6 | 6 | 1 | 9 | 9 | 9  | 85 | 6 | 6 | 6 | 9 | 9 |
|            |            | 52 | 0 | 6 | 6 | 9 | 9 | 9  | 64 | 0 | 0 | 6 | 0 | 9 | 9  | 76 | 6 | 6 | 6 | 9 | 9 | 9  | 87 | 6 | 0 | 6 | 9 | 9 |
| 53         |            | 6  | 6 | 6 | 0 | 9 | 9 | 65 | 6  | 6 | 0 | 9 | 9 | 9 | 77 | 6  | 6 | 6 | 9 | 0 | 9 | 88 | 6  | 6 | 6 | 9 | 8 |   |
| 54         |            | 6  | 6 | 6 | 0 | 9 | 9 | 9  | 67 | 6 | 2 | 6 | 8 | 8 | 8  | 78 | 6 | 6 | 6 | 9 | 9 | 9  | 89 | 6 | 6 | 6 | 6 | 6 |
| 55         |            | 6  | 6 | 6 | 6 | 9 | 9 | 9  | 68 | 6 | 6 | 6 | 9 | 9 | 9  | 79 | 0 | 6 | 1 | 1 | 1 | 0  | 98 | 6 | 6 | 6 | 8 | 8 |
| 57         |            | 6  | 6 | 6 | 6 | 9 | 9 | 9  | 69 | 6 | 0 | 6 | 9 | 9 | 9  | 80 | 6 | 6 | 0 | 9 | 1 | 0  | 92 | 6 | 6 | 6 | 9 | 9 |
| 58         |            | 6  | 1 | 6 | 9 | 9 | 9 | 70 | 6  | 6 | 6 | 9 | 9 | 9 | 82 | 6  | 6 | 6 | 9 | 9 | 9 | 93 | 6  | 6 | 6 | 9 | 9 |   |
| 60         |            | 6  | 0 | 6 | 9 | 9 | 9 | 71 | 0  | 0 | 1 | 9 | 9 | 9 | 83 | 6  | 6 | 6 | 9 | 9 | 9 | 94 | 6  | 0 | 6 | 6 | 0 |   |
| 61         |            | 1  | 0 | 1 | 8 | 6 | 1 | 72 | 0  | 6 | 6 | 9 | 9 | 9 | 84 | 6  | 6 | 6 | 9 | 9 | 9 | 95 | 6  | 6 | 6 | 0 | 6 |   |
| 62         |            | 0  | 0 | 0 | 9 | 9 | 6 | 73 | 6  | 6 | 6 | 9 | 9 | 9 | 86 | 6  | 6 | 6 | 6 | 6 | 6 | 96 | 0  | 6 | 0 | 8 | 8 |   |
| 07/06/2022 |            | 97 | 6 | 6 | 6 | 9 | 9 | 9  | 74 | 6 | 6 | 6 | 6 | 6 | 6  | 75 | 6 | 6 | 1 | 9 | 9 | 9  | 85 | 6 | 6 | 6 | 9 | 9 |
|            |            | 52 | 0 | 6 | 6 | 9 | 9 | 9  | 6  |   |   |   |   |   |    |    |   |   |   |   |   |    |    |   |   |   |   |   |





|            |    |   |   |   |    |    |    |    |   |   |   |    |    |    |    |   |   |   |    |    |    |    |   |   |   |    |     |    |
|------------|----|---|---|---|----|----|----|----|---|---|---|----|----|----|----|---|---|---|----|----|----|----|---|---|---|----|-----|----|
| 07/29/2022 | 97 | 6 | 6 | 6 | 10 | 11 | 11 | 74 | 6 | 6 | 6 | 6  | 6  | 6  | 75 | 6 | 6 | 1 | 9  | 9  | 9  | 85 | 6 | 6 | 6 | 9  | 9   | 9  |
|            | 52 | 0 | 6 | 6 | 10 | 10 | 10 | 64 | 0 | 0 | 6 | 0  | 9  | 9  | 76 | 6 | 6 | 6 | 9  | 9  | 9  | 87 | 6 | 0 | 6 | 9  | 9   | 9  |
|            | 53 | 6 | 6 | 0 | 10 | 10 | 10 | 65 | 6 | 6 | 0 | 10 | 10 | 10 | 77 | 6 | 6 | 6 | 9  | 0  | 9  | 88 | 6 | 6 | 6 | 9  | 9   | 9  |
|            | 54 | 6 | 6 | 0 | 10 | 10 | 10 | 67 | 6 | 2 | 6 | 9  | 9  | 9  | 78 | 6 | 6 | 6 | 9  | 9  | 9  | 89 | 6 | 6 | 6 | 6  | 6   | 6  |
|            | 55 | 6 | 6 | 6 | 10 | 10 | 9  | 68 | 6 | 6 | 6 | 10 | 9  | 9  | 79 | 0 | 6 | 1 | 1  | 1  | 0  | 98 | 6 | 6 | 6 | 9  | 9   | 9  |
|            | 57 | 6 | 6 | 6 | 11 | 11 | 11 | 69 | 6 | 0 | 6 | 9  | 9  | 9  | 80 | 6 | 6 | 0 | 11 | 1  | 0  | 92 | 6 | 6 | 6 | 9  | 9   | 9  |
|            | 58 | 6 | 1 | 6 | 10 | 11 | 11 | 70 | 6 | 6 | 6 | 9  | 9  | 9  | 82 | 6 | 6 | 6 | 9  | 10 | 9  | 93 | 6 | 6 | 6 | 9  | 9   | 9  |
|            | 60 | 6 | 0 | 6 | 11 | 10 | 10 | 71 | 0 | 0 | 1 | 10 | 9  | 9  | 83 | 6 | 6 | 6 | 9  | 9  | 9  | 94 | 6 | 0 | 6 | 6  | 0   | 6  |
|            | 61 | 1 | 0 | 1 | 9  | 6  | 1  | 72 | 0 | 6 | 6 | 11 | 10 | 10 | 84 | 6 | 6 | 6 | 10 | 10 | 10 | 95 | 6 | 6 | 6 | 0  | 6   | 0  |
|            | 62 | 0 | 0 | 0 | 10 | 9  | 6  | 73 | 6 | 6 | 6 | 10 | 10 | 10 | 86 | 6 | 6 | 6 | 6  | 6  | 6  | 96 | 0 | 6 | 0 | 9  | 9   | 6  |
| 08/01/2022 | 97 | 6 | 6 | 6 | 11 | 11 | 11 | 74 | 6 | 6 | 6 | 6  | 6  | 6  | 75 | 6 | 6 | 1 | 11 | 11 | 10 | 85 | 6 | 6 | 6 | 9  | 9   | 9  |
|            | 52 | 0 | 6 | 6 | 11 | 10 | 11 | 64 | 0 | 0 | 6 | 0  | 9  | 9  | 76 | 6 | 6 | 6 | 9  | 10 | 9  | 87 | 6 | 0 | 6 | 9  | 9   | 9  |
|            | 53 | 6 | 6 | 0 | 11 | 11 | 11 | 65 | 6 | 6 | 0 | 10 | 10 | 10 | 77 | 6 | 6 | 6 | 9  | 0  | 9  | 88 | 6 | 6 | 6 | 9  | 9   | 9  |
|            | 54 | 6 | 6 | 0 | 10 | 10 | 10 | 67 | 6 | 2 | 6 | 9  | 9  | 9  | 78 | 6 | 6 | 6 | 9  | 9  | 10 | 89 | 6 | 6 | 6 | 6  | 6   | 6  |
|            | 55 | 6 | 6 | 6 | 11 | 11 | 9  | 68 | 6 | 6 | 6 | 11 | 11 | 11 | 79 | 0 | 6 | 1 | 1  | 1  | 0  | 98 | 6 | 6 | 6 | 9  | 9   | 9  |
|            | 57 | 6 | 6 | 6 | 11 | 11 | 11 | 69 | 6 | 0 | 6 | 9  | 10 | 11 | 80 | 6 | 6 | 0 | 11 | 1  | 0  | 92 | 6 | 6 | 6 | 10 | 9   | 9  |
|            | 58 | 6 | 1 | 6 | 11 | 11 | 11 | 70 | 6 | 6 | 6 | 9  | 9  | 9  | 82 | 6 | 6 | 6 | 11 | 11 | 10 | 93 | 6 | 6 | 6 | 9  | 10  | 10 |
|            | 60 | 6 | 0 | 6 | 11 | 11 | 10 | 71 | 0 | 0 | 1 | 11 | 10 | 10 | 83 | 6 | 6 | 6 | 11 | 10 | 9  | 94 | 6 | 0 | 6 | 6  | 0   | 6  |
|            | 61 | 1 | 0 | 1 | 9  | 6  | 1  | 72 | 0 | 6 | 6 | 11 | 10 | 11 | 84 | 6 | 6 | 6 | 10 | 10 | 10 | 95 | 6 | 6 | 6 | 0  | 6   | 0  |
|            | 62 | 0 | 0 | 0 | 11 | 11 | 6  | 73 | 6 | 6 | 6 | 11 | 10 | 11 | 86 | 6 | 6 | 6 | 6  | 6  | 6  | 96 | 0 | 6 | 0 | 9  | 9   | 6  |
| 08/04/2022 | 97 | 6 | 6 | 6 | 11 | 11 | 11 | 74 | 6 | 6 | 6 | 6  | 6  | 6  | 75 | 6 | 6 | 1 | 11 | 11 | 10 | 85 | 6 | 6 | 6 | 9  | 9   | 9  |
|            | 52 | 0 | 6 | 6 | 11 | 11 | 11 | 64 | 0 | 0 | 6 | 0  | 10 | 9  | 76 | 6 | 6 | 6 | 10 | 11 | 9  | 87 | 6 | 0 | 6 | 9  | 9   | 9  |
|            | 53 | 6 | 6 | 0 | 11 | 11 | 11 | 65 | 6 | 6 | 0 | 10 | 10 | 10 | 77 | 6 | 6 | 6 | 9  | 0  | 9  | 88 | 6 | 6 | 6 | 9  | 9   | 9  |
|            | 54 | 6 | 6 | 0 | 10 | 10 | 10 | 67 | 6 | 2 | 6 | 9  | 9  | 9  | 78 | 6 | 6 | 6 | 9  | 10 | 11 | 89 | 6 | 6 | 6 | 6  | 6   | 6  |
|            | 55 | 6 | 6 | 6 | 11 | 11 | 9  | 68 | 6 | 6 | 6 | 11 | 11 | 11 | 79 | 0 | 6 | 1 | 1  | 1  | 0  | 98 | 6 | 6 | 6 | 9  | 9   | 9  |
|            | 57 | 6 | 6 | 6 | 11 | 11 | 11 | 69 | 6 | 0 | 6 | 10 | 10 | 11 | 80 | 6 | 6 | 0 | 11 | 1  | 0  | 92 | 6 | 6 | 6 | 10 | 9   | 9  |
|            | 58 | 6 | 1 | 6 | 11 | 11 | 11 | 70 | 6 | 6 | 6 | 9  | 9  | 9  | 82 | 6 | 6 | 6 | 11 | 11 | 10 | 93 | 6 | 6 | 6 | 9  | 10  | 10 |
|            | 60 | 6 | 0 | 6 | 11 | 11 | 11 | 71 | 0 | 0 | 1 | 11 | 11 | 10 | 83 | 6 | 6 | 6 | 11 | 10 | 9  | 94 | 6 | 0 | 6 | 6  | 0   | 6  |
|            | 61 | 1 | 0 | 1 | 9  | 6  | 1  | 72 | 0 | 6 | 6 | 11 | 11 | 11 | 84 | 6 | 6 | 6 | 10 | 11 | 10 | 95 | 6 | 6 | 6 | 0  | 6   | 0  |
|            | 62 | 0 | 0 | 0 | 11 | 11 | 6  | 73 | 6 | 6 | 6 | 11 | 10 | 11 | 86 | 6 | 6 | 6 | 6  | 6  | 6  | 96 | 0 | 6 | 0 | 9  | 9   | 6  |
| 08/07/2022 | 97 | 6 | 6 | 6 | 11 | 11 | 11 | 74 | 6 | 6 | 6 | 6  | 6  | 6  | 75 | 6 | 6 | 1 | 11 | 11 | 10 | 85 | 6 | 6 | 6 | 9  | 9   | 9  |
|            | 52 | 0 | 6 | 6 | 11 | 11 | 11 | 64 | 0 | 0 | 6 | 0  | 10 | 9  | 76 | 6 | 6 | 6 | 10 | 11 | 9  | 87 | 6 | 0 | 6 | 9  | 9   | 9  |
|            | 53 | 6 | 6 | 0 | 11 | 11 | 11 | 65 | 6 | 6 | 0 | 10 | 10 | 10 | 77 | 6 | 6 | 6 | 9  | 0  | 9  | 88 | 6 | 6 | 6 | 9  | 11  | 9  |
|            | 54 | 6 | 6 | 0 | 11 | 10 | 10 | 67 | 6 | 2 | 6 | 9  | 9  | 9  | 78 | 6 | 6 | 6 | 10 | 10 | 11 | 89 | 6 | 6 | 6 | 6  | 6   | 6  |
|            | 55 | 6 | 6 | 6 | 11 | 11 | 9  | 68 | 6 | 6 | 6 | 11 | 11 | 11 | 79 | 0 | 6 | 1 | 1  | 1  | 0  | 98 | 6 | 6 | 6 | 9  | 9   | 9  |
|            | 57 | 6 | 6 | 6 | 11 | 11 | 11 | 69 | 6 | 0 | 6 | 11 | 10 | 11 | 80 | 6 | 6 | 0 | 11 | 1  | 0  | 92 | 6 | 6 | 6 | 10 | 9   | 9  |
|            | 58 | 6 | 1 | 6 | 11 | 11 | 11 | 70 | 6 | 6 | 6 | 9  | 9  | 9  | 82 | 6 | 6 | 6 | 11 | 11 | 10 | 93 | 6 | 6 | 6 | 9  | 10  | 10 |
|            | 60 | 6 | 0 | 6 | 11 | 11 | 11 | 71 | 0 | 0 | 1 | 11 | 11 | 10 | 83 | 6 | 6 | 6 | 11 | 10 | 9  | 94 | 6 | 0 | 6 | 6  | 0   | 6  |
|            | 61 | 1 | 0 | 1 | 9  | 6  | 1  | 72 | 0 | 6 | 6 | 11 | 11 | 11 | 84 | 6 | 6 | 6 | 10 | 11 | 10 | 95 | 6 | 6 | 6 | 0  | 6   | 0  |
|            | 62 | 0 | 0 | 0 | 11 | 11 | 6  | 73 | 6 | 6 | 6 | 11 | 10 | 11 | 86 | 6 | 6 | 6 | 6  | 6  | 6  | 96 | 0 | 6 | 0 | 9  | 9   | 6  |
| 08/11/2022 | 97 | 6 | 6 | 6 | 11 | 11 | 11 | 74 | 6 | 6 | 6 | 6  | 6  | 6  | 75 | 6 | 6 | 1 | 11 | 11 | 10 | 85 | 6 | 6 | 6 | 9  | 9   | 9  |
|            | 52 | 0 | 6 | 6 | 11 | 11 | 11 | 64 | 0 | 0 | 6 | 0  | 10 | 9  | 76 | 6 | 6 | 6 | 10 | 11 | 9  | 87 | 6 | 0 | 6 | 9  | 9   | 9  |
|            | 53 | 6 | 6 | 0 | 11 | 11 | 11 | 65 | 6 | 6 | 0 | 10 | 10 | 10 | 77 | 6 | 6 | 6 | 9  | 0  | 10 | 88 | 6 | 6 | 6 | 9  | 11  | 9  |
|            | 54 | 6 | 6 | 0 | 11 | 10 | 11 | 67 | 6 | 2 | 6 | 9  | 9  | 9  | 78 | 6 | 6 | 6 | 10 | 10 | 11 | 89 | 6 | 6 | 6 | 6  | 6   | 6  |
|            | 55 | 6 | 6 | 6 | 11 | 11 | 9  | 68 | 6 | 6 | 6 | 11 | 11 | 11 | 79 | 0 | 6 | 1 | 1  | 1  | 0  | 98 | 6 | 6 | 6 | 9  | 9   | 9  |
|            | 57 | 6 | 6 | 6 | 11 | 11 | 11 | 69 | 6 | 0 | 6 | 11 | 11 | 11 | 80 | 6 | 6 | 0 | 11 | 1  | 0  | 92 | 6 | 6 | 6 | 10 | 9   | 9  |
|            | 58 | 6 | 1 | 6 | 11 | 11 | 11 | 70 | 6 | 6 | 6 | 9  | 9  | 9  | 82 | 6 | 6 | 6 | 11 | 11 | 10 | 93 | 6 | 6 | 6 | 9  | 10  | 10 |
|            | 60 | 6 | 0 | 6 | 11 | 11 | 11 | 71 | 0 | 0 | 1 | 11 | 11 | 10 | 83 | 6 | 6 | 6 | 11 | 10 | 9  | 94 | 6 | 0 | 6 | 6  | 0   | 6  |
|            | 61 | 1 | 0 | 1 | 9  | 6  | 1  | 72 | 0 | 6 | 6 | 11 | 11 | 11 | 84 | 6 | 6 | 6 | 11 | 11 | 11 | 95 | 6 | 6 | 6 | 0  | 6   | 0  |
|            | 62 | 0 | 0 | 0 | 11 | 11 | 6  | 73 | 6 | 6 | 6 | 11 | 11 | 11 | 86 | 6 | 6 | 6 | 6  | 6  | 6  | 96 | 0 | 6 | 0 | 9  | 9   | 6  |
| 08/14/2022 | 97 | 6 | 6 | 6 | 11 | 11 | 11 | 74 | 6 | 6 | 6 | 6  | 6  | 6  | 75 | 6 | 6 | 1 | 11 | 11 | 10 | 85 | 6 | 6 | 6 | 9  | 9   | 9  |
|            | 52 | 0 | 6 | 6 | 11 | 11 | 11 | 64 | 0 | 0 | 6 | 0  | 11 | 11 | 76 | 6 | 6 | 6 | 10 | 11 | 10 | 87 | 6 | 0 | 6 | 9  | 9   | 9  |
|            | 53 | 6 | 6 | 0 | 11 | 11 | 11 | 65 | 6 | 6 | 0 | 11 | 11 | 10 | 77 | 6 | 6 | 6 | 9  | 0  | 10 | 88 | 6 | 6 | 6 | 9  | 11  | 9  |
|            | 54 | 6 | 6 | 0 | 11 | 10 | 11 | 67 | 6 | 2 | 6 | 9  | 9  | 9  | 78 | 6 | 6 | 6 | 10 | 10 | 11 | 89 | 6 | 6 | 6 | 6  | 6   | 6  |
|            | 55 | 6 | 6 | 6 | 11 | 11 | 9  | 68 | 6 | 6 | 6 | 11 | 11 | 11 | 79 | 0 | 6 | 1 | 1  | 1  | 0  | 98 | 6 | 6 | 6 | 9  | 10  | 11 |
|            | 57 | 6 | 6 | 6 | 11 | 11 | 11 | 69 | 6 | 0 | 6 | 11 | 11 | 11 | 80 | 6 | 6 | 0 | 11 | 1  | 0  | 92 | 6 | 6 | 6 | 10 | 10  | 10 |
|            | 58 | 6 | 1 | 6 | 11 | 11 | 11 | 70 | 6 | 6 | 6 | 9  | 9  | 9  | 82 | 6 | 6 | 6 | 11 | 11 | 10 | 93 | 6 | 6 | 6 | 10 | 10  | 10 |
|            | 60 | 6 | 0 | 6 | 11 | 11 | 11 | 71 | 0 | 0 | 1 | 11 | 11 | 11 | 83 | 6 | 6 | 6 | 11 | 10 | 11 | 94 | 6 | 0 | 6 | 6  | 0   | 6  |
|            | 61 | 1 | 0 | 1 | 9  | 6  | 1  | 72 | 0 | 6 | 6 | 11 | 11 | 11 | 84 | 6 | 6 | 6 | 11 | 11 | 11 | 95 | 6 | 6 | 6 | 0  | 6   | 0  |
|            | 62 | 0 | 0 | 0 | 11 | 11 | 6  | 73 | 6 | 6 | 6 | 11 | 11 | 11 | 86 | 6 | 6 | 6 | 6  | 6  | 6  | 96 | 0 | 6 | 0 | 9  | 9   | 6  |
| 08/17/2022 | 97 | 6 | 6 | 6 | 11 | 11 | 11 | 74 | 6 | 6 | 6 | 6  | 6  | 6  | 75 | 6 | 6 | 1 | 11 | 11 | 10 | 85 | 6 | 6 | 6 | 10 | 10  | 9  |
|            | 52 | 0 | 6 | 6 | 11 | 11 | 11 | 64 | 0 | 0 | 6 | 0  | 11 | 11 | 76 | 6 | 6 | 6 | 11 | 11 | 10 | 87 | 6 | 0 | 6 | 9  | 10  | 9  |
|            | 53 | 6 | 6 | 0 | 11 | 11 | 11 | 65 | 6 | 6 | 0 | 11 | 11 | 10 | 77 | 6 | 6 | 6 | 9  | 0  | 10 | 88 | 6 | 6 | 6 | 9  | 11  | 10 |
|            | 54 | 6 | 6 | 0 | 11 | 10 | 11 | 67 | 6 | 2 | 6 | 9  | 9  | 9  | 78 | 6 | 6 | 6 | 10 | 11 | 11 | 89 | 6 | 6 | 6 | 6  | 6</ |    |



|            |            |    |   |   |   |    |    |    |    |    |   |   |    |    |    |    |    |   |   |    |    |    |    |    |    |   |    |    |    |    |
|------------|------------|----|---|---|---|----|----|----|----|----|---|---|----|----|----|----|----|---|---|----|----|----|----|----|----|---|----|----|----|----|
| 08/20/2022 | 97         | 6  | 6 | 6 | 6 | 11 | 11 | 11 | 74 | 6  | 6 | 6 | 6  | 6  | 6  | 75 | 6  | 6 | 1 | 11 | 11 | 10 | 85 | 6  | 6  | 6 | 10 | 10 | 9  |    |
|            | 52         | 0  | 6 | 6 | 6 | 11 | 11 | 11 | 64 | 0  | 0 | 6 | 0  | 11 | 11 | 76 | 6  | 6 | 6 | 11 | 11 | 10 | 87 | 6  | 0  | 6 | 9  | 10 | 9  |    |
|            | 53         | 6  | 6 | 6 | 0 | 11 | 11 | 11 | 65 | 6  | 6 | 0 | 11 | 11 | 11 | 77 | 6  | 6 | 6 | 9  | 0  | 10 | 88 | 6  | 6  | 6 | 9  | 11 | 10 |    |
|            | 54         | 6  | 6 | 6 | 0 | 11 | 11 | 11 | 67 | 6  | 2 | 6 | 9  | 9  | 9  | 78 | 6  | 6 | 6 | 11 | 11 | 11 | 89 | 6  | 6  | 6 | 6  | 6  | 6  |    |
|            | 55         | 6  | 6 | 6 | 6 | 11 | 11 | 9  | 68 | 6  | 6 | 6 | 11 | 11 | 11 | 79 | 0  | 6 | 1 | 1  | 1  | 0  | 98 | 6  | 6  | 6 | 9  | 10 | 11 |    |
|            | 57         | 6  | 6 | 6 | 6 | 11 | 11 | 11 | 69 | 6  | 0 | 6 | 6  | 11 | 11 | 11 | 80 | 6 | 6 | 0  | 11 | 1  | 0  | 92 | 6  | 6 | 6  | 6  | 10 | 10 |
|            | 58         | 6  | 1 | 6 | 6 | 11 | 11 | 11 | 70 | 6  | 6 | 6 | 9  | 9  | 9  | 82 | 6  | 6 | 6 | 11 | 11 | 11 | 93 | 6  | 6  | 6 | 6  | 10 | 10 |    |
|            | 60         | 6  | 0 | 6 | 6 | 11 | 11 | 11 | 71 | 0  | 0 | 1 | 11 | 11 | 11 | 83 | 6  | 6 | 6 | 11 | 11 | 11 | 94 | 6  | 0  | 6 | 6  | 0  | 6  |    |
|            | 61         | 1  | 0 | 0 | 1 | 9  | 6  | 1  | 72 | 0  | 6 | 6 | 6  | 11 | 11 | 11 | 84 | 6 | 6 | 6  | 6  | 11 | 11 | 95 | 6  | 6 | 6  | 0  | 6  | 0  |
|            | 62         | 0  | 0 | 0 | 0 | 11 | 11 | 6  | 73 | 6  | 6 | 6 | 6  | 11 | 11 | 11 | 86 | 6 | 6 | 6  | 6  | 6  | 6  | 96 | 0  | 6 | 0  | 9  | 9  | 6  |
|            | 08/23/2022 | 97 | 6 | 6 | 6 | 6  | 11 | 11 | 11 | 74 | 6 | 6 | 6  | 6  | 6  | 6  | 75 | 6 | 6 | 1  | 11 | 11 | 11 | 85 | 6  | 6 | 6  | 10 | 10 | 10 |
|            |            | 52 | 0 | 6 | 6 | 6  | 11 | 11 | 11 | 64 | 0 | 0 | 6  | 0  | 11 | 11 | 76 | 6 | 6 | 6  | 6  | 11 | 11 | 10 | 87 | 6 | 0  | 6  | 9  | 10 |
| 53         |            | 6  | 6 | 6 | 0 | 11 | 11 | 11 | 65 | 6  | 6 | 0 | 11 | 11 | 11 | 77 | 6  | 6 | 6 | 9  | 0  | 10 | 88 | 6  | 6  | 6 | 9  | 11 | 10 |    |
| 54         |            | 6  | 6 | 6 | 0 | 11 | 11 | 11 | 67 | 6  | 2 | 6 | 9  | 9  | 9  | 78 | 6  | 6 | 6 | 11 | 11 | 11 | 89 | 6  | 6  | 6 | 6  | 6  | 6  |    |
| 55         |            | 6  | 6 | 6 | 6 | 11 | 11 | 9  | 68 | 6  | 6 | 6 | 6  | 11 | 11 | 79 | 0  | 6 | 1 | 1  | 1  | 0  | 98 | 6  | 6  | 6 | 9  | 10 | 11 |    |
| 57         |            | 6  | 6 | 6 | 6 | 11 | 11 | 11 | 69 | 6  | 0 | 6 | 6  | 11 | 11 | 11 | 80 | 6 | 6 | 0  | 11 | 1  | 0  | 92 | 6  | 6 | 6  | 6  | 11 | 10 |
| 58         |            | 6  | 1 | 6 | 6 | 11 | 11 | 11 | 70 | 6  | 6 | 6 | 9  | 9  | 9  | 82 | 6  | 6 | 6 | 11 | 11 | 11 | 93 | 6  | 6  | 6 | 6  | 10 | 11 |    |
| 60         |            | 6  | 0 | 6 | 6 | 11 | 11 | 11 | 71 | 0  | 0 | 1 | 11 | 11 | 11 | 83 | 6  | 6 | 6 | 11 | 11 | 11 | 94 | 6  | 0  | 6 | 6  | 0  | 6  |    |
| 61         |            | 1  | 0 | 0 | 1 | 9  | 6  | 1  | 72 | 0  | 6 | 6 | 6  | 11 | 11 | 11 | 84 | 6 | 6 | 6  | 6  | 11 | 11 | 95 | 6  | 6 | 6  | 0  | 6  | 0  |
| 62         |            | 0  | 0 | 0 | 0 | 11 | 11 | 6  | 73 | 6  | 6 | 6 | 6  | 11 | 11 | 11 | 86 | 6 | 6 | 6  | 6  | 6  | 6  | 96 | 0  | 6 | 0  | 9  | 9  | 6  |
| 08/26/2022 |            | 97 | 6 | 6 | 6 | 6  | 11 | 11 | 11 | 74 | 6 | 6 | 6  | 6  | 6  | 6  | 75 | 6 | 6 | 1  | 11 | 11 | 11 | 85 | 6  | 6 | 6  | 10 | 10 | 10 |
|            |            | 52 | 0 | 6 | 6 | 6  | 11 | 11 | 11 | 64 | 0 | 0 | 6  | 0  | 11 | 11 | 76 | 6 | 6 | 6  | 6  | 11 | 11 | 10 | 87 | 6 | 0  | 6  | 9  | 10 |
|            | 53         | 6  | 6 | 6 | 0 | 11 | 11 | 11 | 65 | 6  | 6 | 0 | 11 | 11 | 11 | 77 | 6  | 6 | 6 | 9  | 0  | 10 | 88 | 6  | 6  | 6 | 9  | 11 | 10 |    |
|            | 54         | 6  | 6 | 6 | 0 | 11 | 11 | 11 | 67 | 6  | 2 | 6 | 9  | 9  | 9  | 78 | 6  | 6 | 6 | 11 | 11 | 11 | 89 | 6  | 6  | 6 | 6  | 6  | 6  |    |
|            | 55         | 6  | 6 | 6 | 6 | 11 | 11 | 9  | 68 | 6  | 6 | 6 | 6  | 11 | 11 | 79 | 0  | 6 | 1 | 1  | 1  | 0  | 98 | 6  | 6  | 6 | 9  | 10 | 11 |    |
|            | 57         | 6  | 6 | 6 | 6 | 11 | 11 | 11 | 69 | 6  | 0 | 6 | 6  | 11 | 11 | 11 | 80 | 6 | 6 | 0  | 11 | 1  | 0  | 92 | 6  | 6 | 6  | 6  | 11 | 10 |
|            | 58         | 6  | 1 | 6 | 6 | 11 | 11 | 11 | 70 | 6  | 6 | 6 | 9  | 9  | 9  | 82 | 6  | 6 | 6 | 11 | 11 | 11 | 93 | 6  | 6  | 6 | 6  | 10 | 11 |    |
|            | 60         | 6  | 0 | 6 | 6 | 11 | 11 | 11 | 71 | 0  | 0 | 1 | 11 | 11 | 11 | 83 | 6  | 6 | 6 | 11 | 11 | 11 | 94 | 6  | 0  | 6 | 6  | 0  | 6  |    |
|            | 61         | 1  | 0 | 0 | 1 | 9  | 6  | 1  | 72 | 0  | 6 | 6 | 6  | 11 | 11 | 11 | 84 | 6 | 6 | 6  | 6  | 11 | 11 | 95 | 6  | 6 | 6  | 0  | 6  | 0  |
|            | 62         | 0  | 0 | 0 | 0 | 11 | 11 | 6  | 73 | 6  | 6 | 6 | 6  | 11 | 11 | 11 | 86 | 6 | 6 | 6  | 6  | 6  | 6  | 96 | 0  | 6 | 0  | 9  | 9  | 6  |
|            | 08/29/2022 | 97 | 6 | 6 | 6 | 6  | 11 | 11 | 11 | 74 | 6 | 6 | 6  | 6  | 6  | 6  | 75 | 6 | 6 | 1  | 11 | 11 | 11 | 85 | 6  | 6 | 6  | 10 | 10 | 10 |
|            |            | 52 | 0 | 6 | 6 | 6  | 11 | 11 | 11 | 64 | 0 | 0 | 6  | 0  | 11 | 11 | 76 | 6 | 6 | 6  | 6  | 11 | 11 | 10 | 87 | 6 | 0  | 6  | 9  | 10 |
| 53         |            | 6  | 6 | 6 | 0 | 11 | 11 | 11 | 65 | 6  | 6 | 0 | 11 | 11 | 11 | 77 | 6  | 6 | 6 | 9  | 0  | 10 | 88 | 6  | 6  | 6 | 9  | 11 | 10 |    |
| 54         |            | 6  | 6 | 6 | 0 | 11 | 11 | 11 | 67 | 6  | 2 | 6 | 9  | 9  | 9  | 78 | 6  | 6 | 6 | 11 | 11 | 11 | 89 | 6  | 6  | 6 | 6  | 6  | 6  |    |
| 55         |            | 6  | 6 | 6 | 6 | 11 | 11 | 9  | 68 | 6  | 6 | 6 | 6  | 11 | 11 | 79 | 0  | 6 | 1 | 1  | 1  | 0  | 98 | 6  | 6  | 6 | 9  | 10 | 11 |    |
| 57         |            | 6  | 6 | 6 | 6 | 11 | 11 | 11 | 69 | 6  | 0 | 6 | 6  | 11 | 11 | 11 | 80 | 6 | 6 | 0  | 11 | 1  | 0  | 92 | 6  | 6 | 6  | 6  | 11 | 10 |
| 58         |            | 6  | 1 | 6 | 6 | 11 | 11 | 11 | 70 | 6  | 6 | 6 | 9  | 9  | 9  | 82 | 6  | 6 | 6 | 11 | 11 | 11 | 93 | 6  | 6  | 6 | 6  | 10 | 11 |    |
| 60         |            | 6  | 0 | 6 | 6 | 11 | 11 | 11 | 71 | 0  | 0 | 1 | 11 | 11 | 11 | 83 | 6  | 6 | 6 | 11 | 11 | 11 | 94 | 6  | 0  | 6 | 6  | 0  | 6  |    |
| 61         |            | 1  | 0 | 0 | 1 | 9  | 6  | 1  | 72 | 0  | 6 | 6 | 6  | 11 | 11 | 11 | 84 | 6 | 6 | 6  | 6  | 11 | 11 | 95 | 6  | 6 | 6  | 0  | 6  | 0  |
| 62         |            | 0  | 0 | 0 | 0 | 11 | 11 | 6  | 73 | 6  | 6 | 6 | 6  | 11 | 11 | 11 | 86 | 6 | 6 | 6  | 6  | 6  | 6  | 96 | 0  | 6 | 0  | 9  | 9  | 6  |
| 09/01/2022 |            | 97 | 6 | 6 | 6 | 6  | 11 | 11 | 11 | 74 | 6 | 6 | 6  | 6  | 6  | 6  | 75 | 6 | 6 | 1  | 11 | 11 | 11 | 85 | 6  | 6 | 6  | 10 | 10 | 10 |
|            |            | 52 | 0 | 6 | 6 | 6  | 11 | 11 | 11 | 64 | 0 | 0 | 6  | 0  | 11 | 11 | 76 | 6 | 6 | 6  | 6  | 11 | 11 | 10 | 87 | 6 | 0  | 6  | 9  | 10 |
|            | 53         | 6  | 6 | 6 | 0 | 11 | 11 | 11 | 65 | 6  | 6 | 0 | 11 | 11 | 11 | 77 | 6  | 6 | 6 | 9  | 0  | 10 | 88 | 6  | 6  | 6 | 9  | 11 | 10 |    |
|            | 54         | 6  | 6 | 6 | 0 | 11 | 11 | 11 | 67 | 6  | 2 | 6 | 9  | 9  | 9  | 78 | 6  | 6 | 6 | 11 | 11 | 11 | 89 | 6  | 6  | 6 | 6  | 6  | 6  |    |
|            | 55         | 6  | 6 | 6 | 6 | 11 | 11 | 9  | 68 | 6  | 6 | 6 | 6  | 11 | 11 | 79 | 0  | 6 | 1 | 1  | 1  | 0  | 98 | 6  | 6  | 6 | 9  | 10 | 11 |    |
|            | 57         | 6  | 6 | 6 | 6 | 11 | 11 | 11 | 69 | 6  | 0 | 6 | 6  | 11 | 11 | 11 | 80 | 6 | 6 | 0  | 11 | 1  | 0  | 92 | 6  | 6 | 6  | 6  | 11 | 10 |
|            | 58         | 6  | 1 | 6 | 6 | 11 | 11 | 11 | 70 | 6  | 6 | 6 | 9  | 9  | 9  | 82 | 6  | 6 | 6 | 11 | 11 | 11 | 93 | 6  | 6  | 6 | 6  | 10 | 11 |    |
|            | 60         | 6  | 0 | 6 | 6 | 11 | 11 | 11 | 71 | 0  | 0 | 1 | 11 | 11 | 11 | 83 | 6  | 6 | 6 | 11 | 11 | 11 | 94 | 6  | 0  | 6 | 6  | 0  | 6  |    |
|            | 61         | 1  | 0 | 0 | 1 | 9  | 6  | 1  | 72 | 0  | 6 | 6 | 6  | 11 | 11 | 11 | 84 | 6 | 6 | 6  | 6  | 11 | 11 | 95 | 6  | 6 | 6  | 0  | 6  | 0  |
|            | 62         | 0  | 0 | 0 | 0 | 11 | 11 | 6  | 73 | 6  | 6 | 6 | 6  | 11 | 11 | 11 | 86 | 6 | 6 | 6  | 6  | 6  | 6  | 96 | 0  | 6 | 0  | 9  | 9  | 6  |
|            | 09/03/2022 | 97 | 6 | 6 | 6 | 6  | 11 | 11 | 11 | 74 | 6 | 6 | 6  | 6  | 6  | 6  | 75 | 6 | 6 | 1  | 11 | 11 | 11 | 85 | 6  | 6 | 6  | 10 | 10 | 10 |
|            |            | 52 | 0 | 6 | 6 | 6  | 11 | 11 | 11 | 64 | 0 | 0 | 6  | 0  | 11 | 11 | 76 | 6 | 6 | 6  | 6  | 11 | 11 | 10 | 87 | 6 | 0  | 6  | 9  | 10 |
| 53         |            | 6  | 6 | 6 | 0 | 11 | 11 | 11 | 65 | 6  | 6 | 0 | 11 | 11 | 11 | 77 | 6  | 6 | 6 | 9  | 0  | 10 | 88 | 6  | 6  | 6 | 9  | 11 | 10 |    |
| 54         |            | 6  | 6 | 6 | 0 | 11 | 11 | 11 | 67 | 6  | 2 | 6 | 9  | 9  | 9  | 78 | 6  | 6 | 6 | 11 | 11 | 11 | 89 | 6  | 6  | 6 | 6  | 6  | 6  |    |
| 55         |            | 6  | 6 | 6 | 6 | 11 | 11 | 9  | 68 | 6  | 6 | 6 | 6  | 11 | 11 | 79 | 0  | 6 | 1 | 1  | 1  | 0  | 98 | 6  | 6  | 6 | 9  | 10 | 11 |    |
| 57         |            | 6  | 6 | 6 | 6 | 11 | 11 | 11 | 69 | 6  | 0 | 6 | 6  | 11 | 11 | 11 | 80 | 6 | 6 | 0  | 11 | 1  | 0  | 92 | 6  | 6 | 6  | 6  | 11 | 10 |
| 58         |            | 6  | 1 | 6 | 6 | 11 | 11 | 11 | 70 | 6  | 6 | 6 | 9  | 9  | 9  | 82 | 6  | 6 | 6 | 11 | 11 | 11 | 93 | 6  | 6  | 6 | 6  | 10 | 11 |    |
| 60         |            | 6  | 0 | 6 | 6 | 11 | 11 | 11 | 71 | 0  | 0 | 1 | 11 | 11 | 11 | 83 | 6  | 6 | 6 | 11 | 11 | 11 | 94 | 6  | 0  | 6 | 6  | 0  | 6  |    |
| 61         |            | 1  | 0 | 0 | 1 | 9  | 6  | 1  | 72 | 0  | 6 | 6 | 6  | 11 | 11 | 11 | 84 | 6 | 6 | 6  | 6  | 11 | 11 | 95 | 6  | 6 | 6  | 0  | 6  | 0  |
| 62         |            | 0  | 0 | 0 | 0 | 11 | 11 | 6  | 73 | 6  | 6 | 6 | 6  | 11 | 11 | 11 | 86 | 6 | 6 | 6  | 6  | 6  | 6  | 96 | 0  | 6 | 0  | 9  | 9  | 6  |
| 09/07/2022 |            | 97 | 6 | 6 | 6 | 6  | 11 | 11 | 11 | 74 | 6 | 6 | 6  | 6  | 6  | 6  | 75 | 6 | 6 | 1  | 11 | 11 | 11 | 85 | 6  | 6 | 6  | 11 | 10 | 10 |
|            |            | 52 | 0 | 6 | 6 | 6  | 11 | 11 | 11 | 64 | 0 | 0 | 6  | 0  | 11 | 11 | 76 | 6 | 6 | 6  | 6  | 11 | 11 | 10 | 87 | 6 | 0  | 6  | 9  | 10 |
|            | 53         | 6  | 6 | 6 | 0 | 11 | 11 | 11 | 65 | 6  | 6 | 0 | 11 | 11 | 11 | 77 | 6  | 6 | 6 | 9  | 0  | 10 | 88 | 6  | 6  | 6 | 9  | 11 | 10 |    |
|            | 54         | 6  | 6 | 6 | 0 | 11 | 11 | 11 | 67 | 6  | 2 | 6 | 9  | 9  | 9  | 78 | 6  | 6 | 6 | 11 | 11 | 11 | 89 | 6  | 6  |   |    |    |    |    |

|            |    |   |   |   |    |    |    |    |   |   |   |    |    |    |    |   |   |   |    |    |    |    |   |   |   |    |    |    |
|------------|----|---|---|---|----|----|----|----|---|---|---|----|----|----|----|---|---|---|----|----|----|----|---|---|---|----|----|----|
| 09/10/2022 | 97 | 6 | 6 | 6 | 11 | 11 | 11 | 74 | 6 | 6 | 6 | 6  | 6  | 6  | 75 | 6 | 6 | 1 | 11 | 11 | 11 | 85 | 6 | 6 | 6 | 11 | 10 | 10 |
|            | 52 | 0 | 6 | 6 | 11 | 11 | 11 | 64 | 0 | 0 | 6 | 0  | 11 | 11 | 76 | 6 | 6 | 6 | 11 | 11 | 10 | 87 | 6 | 0 | 6 | 9  | 10 | 9  |
|            | 53 | 6 | 6 | 0 | 11 | 11 | 11 | 65 | 6 | 6 | 0 | 11 | 11 | 11 | 77 | 6 | 6 | 6 | 9  | 0  | 10 | 88 | 6 | 6 | 6 | 9  | 11 | 10 |
|            | 54 | 6 | 6 | 0 | 11 | 11 | 11 | 67 | 6 | 2 | 6 | 9  | 9  | 9  | 78 | 6 | 6 | 6 | 11 | 11 | 11 | 89 | 6 | 6 | 6 | 6  | 6  | 6  |
|            | 55 | 6 | 6 | 6 | 11 | 11 | 9  | 68 | 6 | 6 | 6 | 11 | 11 | 11 | 79 | 0 | 6 | 1 | 1  | 1  | 0  | 98 | 6 | 6 | 6 | 9  | 10 | 11 |
|            | 57 | 6 | 6 | 6 | 11 | 11 | 11 | 69 | 6 | 0 | 6 | 11 | 11 | 11 | 80 | 6 | 6 | 0 | 11 | 1  | 0  | 92 | 6 | 6 | 6 | 11 | 10 | 11 |
|            | 58 | 6 | 1 | 6 | 11 | 11 | 11 | 70 | 6 | 6 | 6 | 9  | 9  | 9  | 82 | 6 | 6 | 6 | 11 | 11 | 11 | 93 | 6 | 6 | 6 | 10 | 11 | 10 |
|            | 60 | 6 | 0 | 6 | 11 | 11 | 11 | 71 | 0 | 0 | 1 | 11 | 11 | 11 | 83 | 6 | 6 | 6 | 11 | 11 | 11 | 94 | 6 | 0 | 6 | 6  | 0  | 6  |
|            | 61 | 1 | 0 | 1 | 9  | 6  | 1  | 72 | 0 | 6 | 6 | 11 | 11 | 11 | 84 | 6 | 6 | 6 | 11 | 11 | 11 | 95 | 6 | 6 | 6 | 0  | 6  | 0  |
|            | 62 | 0 | 0 | 0 | 11 | 11 | 6  | 73 | 6 | 6 | 6 | 11 | 11 | 11 | 86 | 6 | 6 | 6 | 6  | 6  | 6  | 96 | 0 | 6 | 0 | 9  | 9  | 6  |
| 09/13/2022 | 97 | 6 | 6 | 6 | 11 | 11 | 11 | 74 | 6 | 6 | 6 | 6  | 6  | 6  | 75 | 6 | 6 | 1 | 11 | 11 | 11 | 85 | 6 | 6 | 6 | 11 | 10 | 10 |
|            | 52 | 0 | 6 | 6 | 11 | 11 | 11 | 64 | 0 | 0 | 6 | 0  | 11 | 11 | 76 | 6 | 6 | 6 | 11 | 11 | 10 | 87 | 6 | 0 | 6 | 9  | 10 | 9  |
|            | 53 | 6 | 6 | 0 | 11 | 11 | 11 | 65 | 6 | 6 | 0 | 11 | 11 | 11 | 77 | 6 | 6 | 6 | 9  | 0  | 10 | 88 | 6 | 6 | 6 | 9  | 11 | 10 |
|            | 54 | 6 | 6 | 0 | 11 | 11 | 11 | 67 | 6 | 2 | 6 | 9  | 9  | 9  | 78 | 6 | 6 | 6 | 11 | 11 | 11 | 89 | 6 | 6 | 6 | 6  | 6  | 6  |
|            | 55 | 6 | 6 | 6 | 11 | 11 | 9  | 68 | 6 | 6 | 6 | 11 | 11 | 11 | 79 | 0 | 6 | 1 | 1  | 1  | 0  | 98 | 6 | 6 | 6 | 9  | 10 | 11 |
|            | 57 | 6 | 6 | 6 | 11 | 11 | 11 | 69 | 6 | 0 | 6 | 11 | 11 | 11 | 80 | 6 | 6 | 0 | 11 | 1  | 0  | 92 | 6 | 6 | 6 | 11 | 10 | 11 |
|            | 58 | 6 | 1 | 6 | 11 | 11 | 11 | 70 | 6 | 6 | 6 | 9  | 9  | 9  | 82 | 6 | 6 | 6 | 11 | 11 | 11 | 93 | 6 | 6 | 6 | 10 | 11 | 10 |
|            | 60 | 6 | 0 | 6 | 11 | 11 | 11 | 71 | 0 | 0 | 1 | 11 | 11 | 11 | 83 | 6 | 6 | 6 | 11 | 11 | 11 | 94 | 6 | 0 | 6 | 6  | 0  | 6  |
|            | 61 | 1 | 0 | 1 | 9  | 6  | 1  | 72 | 0 | 6 | 6 | 11 | 11 | 11 | 84 | 6 | 6 | 6 | 11 | 11 | 11 | 95 | 6 | 6 | 6 | 0  | 6  | 0  |
|            | 62 | 0 | 0 | 0 | 11 | 11 | 6  | 73 | 6 | 6 | 6 | 11 | 11 | 11 | 86 | 6 | 6 | 6 | 6  | 6  | 6  | 96 | 0 | 6 | 0 | 9  | 9  | 6  |
|            | 97 | 6 | 6 | 6 | 11 | 11 | 11 | 74 | 6 | 6 | 6 | 6  | 6  | 6  | 75 | 6 | 6 | 1 | 11 | 11 | 11 | 85 | 6 | 6 | 6 | 11 | 10 | 10 |
|            | 52 | 0 | 6 | 6 | 11 | 11 | 11 | 64 | 0 | 0 | 6 | 0  | 11 | 11 | 76 | 6 | 6 | 6 | 11 | 11 | 10 | 87 | 6 | 0 | 6 | 9  | 10 | 9  |
|            | 53 | 6 | 6 | 0 | 11 | 11 | 11 | 65 | 6 | 6 | 0 | 11 | 11 | 11 | 77 | 6 | 6 | 6 | 9  | 0  | 10 | 88 | 6 | 6 | 6 | 9  | 11 | 10 |
|            | 54 | 6 | 6 | 0 | 11 | 11 | 11 | 67 | 6 | 2 | 6 | 9  | 9  | 9  | 78 | 6 | 6 | 6 | 11 | 11 | 11 | 89 | 6 | 6 | 6 | 6  | 6  | 6  |
|            | 55 | 6 | 6 | 6 | 11 | 11 | 9  | 68 | 6 | 6 | 6 | 11 | 11 | 11 | 79 | 0 | 6 | 1 | 1  | 1  | 0  | 98 | 6 | 6 | 6 | 9  | 10 | 11 |
|            | 57 | 6 | 6 | 6 | 11 | 11 | 11 | 69 | 6 | 0 | 6 | 11 | 11 | 11 | 80 | 6 | 6 | 0 | 11 | 1  | 0  | 92 | 6 | 6 | 6 | 11 | 10 | 11 |
|            | 58 | 6 | 1 | 6 | 11 | 11 | 11 | 70 | 6 | 6 | 6 | 9  | 9  | 9  | 82 | 6 | 6 | 6 | 11 | 11 | 11 | 93 | 6 | 6 | 6 | 10 | 11 | 10 |
|            | 60 | 6 | 0 | 6 | 11 | 11 | 11 | 71 | 0 | 0 | 1 | 11 | 11 | 11 | 83 | 6 | 6 | 6 | 11 | 11 | 11 | 94 | 6 | 0 | 6 | 6  | 0  | 6  |
|            | 61 | 1 | 0 | 1 | 9  | 6  | 1  | 72 | 0 | 6 | 6 | 11 | 11 | 11 | 84 | 6 | 6 | 6 | 11 | 11 | 11 | 95 | 6 | 6 | 6 | 0  | 6  | 0  |
|            | 62 | 0 | 0 | 0 | 11 | 11 | 6  | 73 | 6 | 6 | 6 | 11 | 11 | 11 | 86 | 6 | 6 | 6 | 6  | 6  | 6  | 96 | 0 | 6 | 0 | 9  | 9  | 6  |

**Table S2:** Phenological data from tagged vegetative and reproductive shoots of *V. angustifolium*.

| Date       | <i>V. angustifolium</i> (0% Shade)                                                                  |      |      |      |      |      |      | <i>V. angustifolium</i> (30% Shade) |      |      |      |      |      |      | <i>V. angustifolium</i> (50% Shade) |      |      |      |      |      |      | <i>V. angustifolium</i> (80% Shade) |      |      |      |      |      |      |
|------------|-----------------------------------------------------------------------------------------------------|------|------|------|------|------|------|-------------------------------------|------|------|------|------|------|------|-------------------------------------|------|------|------|------|------|------|-------------------------------------|------|------|------|------|------|------|
|            | Pot #                                                                                               | A(V) | B(V) | C(V) | D(R) | E(R) | F(R) | Pot #                               | A(V) | B(V) | C(V) | D(R) | E(R) | F(R) | Pot #                               | A(V) | B(V) | C(V) | D(R) | E(R) | F(R) | Pot #                               | A(V) | B(V) | C(V) | D(R) | E(R) | F(R) |
| 05/10/2022 | 1                                                                                                   | 2    | 2    | 1    | 4    | 3    | 3    | 13                                  | 1    | 1    | 1    | 1    | 1    | 1    | 22                                  | 2    | 2    | 2    | 3    | 3    | 3    | 10                                  | 0    | 1    | 1    | 3    | 2    | 3    |
|            | 2                                                                                                   | 1    | 1    | 1    | 1    | 1    | 0    | 14                                  | 0    | 1    | 2    | 2    | 1    | 2    | 23                                  | 1    | 1    | 1    | 0    | 0    | 0    | 16                                  | 1    | 1    | 1    | 1    | 1    | 1    |
|            | 4                                                                                                   | 2    | 1    | 0    | 3    | 4    | 4    | 15                                  | 1    | 1    | 1    | 1    | 1    | 2    | 27                                  | 2    | 1    | 1    | 4    | 3    | 3    | 36                                  | 0    | 0    | 0    | 0    | 0    | 0    |
|            | 5                                                                                                   | 0    | 2    | 1    | 2    | 3    | 2    | 17                                  | 1    | 2    | 2    | 2    | 0    | 0    | 28                                  | 1    | 1    | 2    | 3    | 3    | 1    | 38                                  | 1    | 1    | 0    | 0    | 0    | 0    |
|            | 7                                                                                                   | 1    | 2    | 3    | 4    | 4    | 4    | 18                                  | 1    | 1    | 0    | 0    | 0    | 0    | 29                                  | 1    | 2    | 1    | 1    | 2    | 0    | 40                                  | 2    | 2    | 2    | 2    | 2    | 3    |
|            | 8                                                                                                   | 1    | 1    | 2    | 3    | 2    | 3    | 3                                   | 1    | 1    | 1    | 1    | 1    | 1    | 30                                  | 2    | 1    | 1    | 1    | 0    | 0    | 41                                  | 1    | 1    | 1    | 0    | 0    | 0    |
|            | 6                                                                                                   | 1    | 2    | 2    | 2    | 2    | 2    | 19                                  | 0    | 2    | 1    | 1    | 2    | 2    | 31                                  | 1    | 2    | 1    | 3    | 1    | 0    | 46                                  | 1    | 1    | 1    | 0    | 0    | 0    |
|            | 12                                                                                                  | 2    | 1    | 2    | 2    | 3    | 2    | 20                                  | 0    | 0    | 1    | 1    | 0    | 0    | 34                                  | 0    | 1    | 1    | 2    | 2    | 2    | 47                                  | 0    | 0    | 0    | 0    | 0    | 0    |
|            | 26                                                                                                  | 1    | 0    | 0    | 0    | 0    | 0    | 25                                  | 0    | 1    | 2    | 2    | 0    | 0    | 37                                  | 2    | 1    | 1    | 1    | 1    | 1    | 48                                  | 1    | 0    | 1    | 1    | 1    | 1    |
|            | 33                                                                                                  | 1    | 1    | 1    | 1    | 1    | 1    | 35                                  | 2    | 2    | 2    | 2    | 1    | 1    | 45                                  | 2    | 2    | 2    | 3    | 2    | 3    | 49                                  | 1    | 2    | 2    | 3    | 1    | 2    |
| 05/13/2022 | 1                                                                                                   | 2    | 3    | 2    | 4    | 4    | 3    | 13                                  | 1    | 2    | 1    | 2    | 2    | 3    | 22                                  | 3    | 3    | 4    | 4    | 4    | 4    | 10                                  | 1    | 1    | 2    | 3    | 3    | 3    |
|            | 2                                                                                                   | 1    | 1    | 1    | 1    | 3    | 1    | 14                                  | 1    | 1    | 2    | 3    | 2    | 3    | 23                                  | 1    | 1    | 1    | 0    | 0    | 0    | 16                                  | 1    | 2    | 2    | 1    | 1    | 1    |
|            | 4                                                                                                   | 3    | 3    | 1    | 4    | 4    | 4    | 15                                  | 1    | 2    | 2    | 3    | 2    | 3    | 27                                  | 2    | 1    | 1    | 4    | 4    | 4    | 36                                  | 0    | 0    | 0    | 0    | 0    | 0    |
|            | 5                                                                                                   | 1    | 3    | 1    | 3    | 3    | 2    | 17                                  | 2    | 3    | 3    | 3    | 1    | 2    | 28                                  | 1    | 1    | 3    | 3    | 3    | 1    | 38                                  | 1    | 1    | 1    | 1    | 1    | 2    |
|            | 7                                                                                                   | 2    | 3    | 3    | 4    | 4    | 4    | 18                                  | 2    | 2    | 0    | 0    | 0    | 0    | 29                                  | 2    | 3    | 3    | 3    | 3    | 0    | 40                                  | 2    | 2    | 2    | 3    | 2    | 4    |
|            | 8                                                                                                   | 2    | 2    | 3    | 3    | 2    | 3    | 3                                   | 1    | 1    | 1    | 3    | 1    | 1    | 30                                  | 2    | 1    | 1    | 1    | 1    | 1    | 41                                  | 1    | 1    | 1    | 0    | 0    | 1    |
|            | 6                                                                                                   | 2    | 2    | 2    | 2    | 2    | 2    | 19                                  | 1    | 2    | 2    | 2    | 1    | 4    | 31                                  | 2    | 3    | 1    | 3    | 1    | 0    | 46                                  | 1    | 1    | 1    | 2    | 2    | 1    |
|            | 12                                                                                                  | 3    | 2    | 3    | 3    | 3    | 3    | 20                                  | 1    | 1    | 2    | 0    | 1    | 1    | 34                                  | 0    | 2    | 1    | 2    | 3    | 3    | 47                                  | 0    | 0    | 0    | 0    | 0    | 0    |
|            | 26                                                                                                  | 2    | 2    | 2    | 0    | 0    | 0    | 25                                  | 0    | 3    | 2    | 3    | 2    | 1    | 37                                  | 2    | 1    | 1    | 2    | 2    | 2    | 48                                  | 1    | 1    | 2    | 2    | 1    | 1    |
|            | 33                                                                                                  | 2    | 2    | 2    | 2    | 2    | 2    | 35                                  | 2    | 3    | 2    | 3    | 3    | 3    | 45                                  | 2    | 3    | 3    | 3    | 3    | 4    | 49                                  | 1    | 2    | 2    | 4    | 2    | 2    |
| 05/16/2022 | 1                                                                                                   | 3    | 3    | 2    | 5    | 4    | 4    | 13                                  | 1    | 4    | 3    | 3    | 3    | 3    | 22                                  | 4    | 4    | 5    | 4    | 4    | 4    | 10                                  | 4    | 3    | 3    | 4    | 4    | 4    |
|            | 2                                                                                                   | 1    | 2    | 1    | 2    | 4    | 1    | 14                                  | 1    | 1    | 2    | 4    | 3    | 3    | 23                                  | 1    | 1    | 1    | 0    | 0    | 0    | 16                                  | 3    | 3    | 3    | 1    | 1    | 2    |
|            | 4                                                                                                   | 3    | 3    | 1    | 5    | 5    | 5    | 15                                  | 2    | 3    | 4    | 3    | 3    | 3    | 27                                  | 4    | 4    | 3    | 4    | 4    | 4    | 36                                  | 0    | 0    | 0    | 0    | 0    | 0    |
|            | 5                                                                                                   | 1    | 4    | 1    | 3    | 3    | 2    | 17                                  | 3    | 4    | 4    | 4    | 2    | 3    | 28                                  | 3    | 3    | 5    | 4    | 4    | 4    | 38                                  | 3    | 4    | 3    | 2    | 2    | 3    |
|            | 7                                                                                                   | 3    | 4    | 4    | 4    | 4    | 4    | 18                                  | 4    | 4    | 0    | 0    | 0    | 0    | 29                                  | 5    | 4    | 4    | 4    | 4    | 0    | 40                                  | 5    | 4    | 4    | 3    | 4    | 4    |
|            | 8                                                                                                   | 2    | 2    | 3    | 3    | 2    | 4    | 3                                   | 1    | 1    | 1    | 3    | 1    | 2    | 30                                  | 4    | 3    | 3    | 3    | 4    | 2    | 41                                  | 3    | 3    | 3    | 1    | 0    | 3    |
|            | 6                                                                                                   | 2    | 2    | 2    | 3    | 3    | 3    | 19                                  | 1    | 4    | 3    | 4    | 1    | 4    | 31                                  | 4    | 6    | 3    | 4    | 3    | 0    | 46                                  | 4    | 4    | 4    | 4    | 4    | 4    |
|            | 12                                                                                                  | 4    | 5    | 4    | 4    | 4    | 4    | 20                                  | 2    | 1    | 3    | 1    | 1    | 2    | 34                                  | 0    | 4    | 1    | 3    | 4    | 5    | 47                                  | 0    | 0    | 0    | 0    | 0    | 0    |
|            | 26                                                                                                  | 2    | 2    | 2    | 0    | 0    | 0    | 25                                  | 1    | 5    | 3    | 4    | 4    | 3    | 37                                  | 4    | 3    | 3    | 3    | 3    | 3    | 48                                  | 3    | 3    | 4    | 4    | 3    | 3    |
|            | 33                                                                                                  | 5    | 4    | 4    | 5    | 4    | 5    | 35                                  | 4    | 4    | 3    | 4    | 4    | 4    | 45                                  | 4    | 4    | 5    | 3    | 5    | 5    | 49                                  | 4    | 4    | 5    | 4    | 3    | 3    |
| 05/19/22   | 1                                                                                                   | 5    | 4    | 3    | 5    | 4    | 4    | 13                                  | 1    | 4    | 4    | 3    | 3    | 3    | 22                                  | 5    | 5    | 6    | 5    | 5    | 4    | 10                                  | 4    | 4    | 4    | 4    | 4    | 4    |
|            | 2                                                                                                   | 1    | 3    | 1    | 2    | 6    | 1    | 14                                  | 1    | 1    | 3    | 4    | 3    | 3    | 23                                  | 1    | 1    | 1    | 1    | 1    | 1    | 16                                  | 4    | 4    | 4    | 1    | 3    | 3    |
|            | 4                                                                                                   | 5    | 4    | 1    | 5    | 5    | 5    | 15                                  | 4    | 4    | 4    | 3    | 3    | 4    | 27                                  | 6    | 4    | 4    | 5    | 4    | 4    | 21                                  | 5    | 5    | 5    | 3    | 5    | 5    |
|            | 5                                                                                                   | 3    | 5    | 1    | 4    | 3    | 3    | 17                                  | 4    | 5    | 5    | 3    | 3    | 3    | 28                                  | 4    | 4    | 5    | 4    | 4    | 3    | 38                                  | 3    | 4    | 3    | 3    | 4    | 4    |
|            | 7                                                                                                   | 4    | 6    | 6    | 4    | 5    | 4    | 18                                  | 5    | 5    | 0    | 0    | 0    | 0    | 29                                  | 5    | 5    | 5    | 5    | 4    | 0    | 40                                  | 5    | 6    | 6    | 3    | 3    | 4    |
|            | 8                                                                                                   | 2    | 2    | 5    | 3    | 2    | 5    | 3                                   | 3    | 1    | 1    | 3    | 1    | 3    | 30                                  | 5    | 4    | 4    | 3    | 5    | 2    | 41                                  | 4    | 3    | 4    | 1    | 0    | 3    |
|            | 6                                                                                                   | 3    | 3    | 3    | 3    | 3    | 3    | 19                                  | 1    | 4    | 4    | 4    | 3    | 5    | 31                                  | 5    | 6    | 3    | 4    | 3    | 0    | 46                                  | 5    | 5    | 4    | 5    | 5    | 4    |
|            | 12                                                                                                  | 4    | 5    | 5    | 4    | 4    | 4    | 20                                  | 3    | 1    | 3    | 2    | 1    | 2    | 34                                  | 0    | 5    | 1    | 3    | 5    | 0    | 44                                  | 5    | 4    | 4    | 4    | 5    | 3    |
|            | 26                                                                                                  | 2    | 2    | 2    | 0    | 0    | 0    | 25                                  | 3    | 6    | 3    | 4    | 4    | 4    | 37                                  | 4    | 3    | 4    | 4    | 4    | 4    | 48                                  | 3    | 4    | 5    | 4    | 3    | 3    |
|            | 33                                                                                                  | 6    | 5    | 6    | 6    | 5    | 6    | 35                                  | 4    | 5    | 5    | 4    | 4    | 4    | 45                                  | 5    | 5    | 5    | 3    | 5    | 5    | 49                                  | 5    | 6    | 6    | 4    | 3    | 3    |
| 05/19/22   | NOTES: 36 was switched to 21(all veg) due to plant death; 47 was switched to 44 due to plant death. |      |      |      |      |      |      |                                     |      |      |      |      |      |      |                                     |      |      |      |      |      |      |                                     |      |      |      |      |      |      |
| 05/22/22   | 1                                                                                                   | 5    | 4    | 4    | 5    | 4    | 4    | 13                                  | 1    | 4    | 4    | 4    | 4    | 4    | 22                                  | 6    | 6    | 6    | 5    | 5    | 4    | 10                                  | 5    | 4    | 5    | 5    | 5    | 5    |
|            | 2                                                                                                   | 1    | 3    | 1    | 3    | 6    | 1    | 14                                  | 1    | 1    | 3    | 4    | 4    | 4    | 23                                  | 1    | 1    | 1    | 1    | 1    | 1    | 16                                  | 4    | 4    | 4    | 1    | 3    | 3    |
|            | 4                                                                                                   | 5    | 5    | 1    | 5    | 5    | 5    | 15                                  | 5    | 5    | 4    | 4    | 4    | 4    | 27                                  | 6    | 5    | 5    | 5    | 4    | 5    | 21                                  | 6    | 6    | 5    | 6    | 6    | 6    |
|            | 5                                                                                                   | 5    | 5    | 1    | 5    | 4    | 4    | 17                                  | 4    | 6    | 5    | 4    | 4    | 4    | 28                                  | 4    | 4    | 6    | 5    | 5    | 4    | 38                                  | 4    | 5    | 3    | 3    | 3    | 5    |
|            | 7                                                                                                   | 5    | 4    | 4    | 4    | 5    | 4    | 18                                  | 5    | 5    | 0    | 0    | 0    | 0    | 29                                  | 6    | 6    | 6    | 6    | 4    | 0    | 40                                  | 6    | 6    | 6    | 4    | 4    | 4    |
|            | 8                                                                                                   | 2    | 2    | 5    | 4    | 3    | 5    | 3                                   | 3    | 1    | 1    | 4    | 1    | 4    | 30                                  | 6    | 4    | 4    | 4    | 3    | 6    | 41                                  | 5    | 4    | 5    | 3    | 0    | 3    |
|            | 6                                                                                                   | 3    | 4    | 3    | 4    | 4    | 4    | 19                                  | 3    | 5    | 5    | 4    | 3    | 5    | 31                                  | 6    | 6    | 3    | 5    | 4    | 0    | 46                                  | 5    | 5    | 5    | 6    | 5    | 4    |
|            | 12                                                                                                  | 6    | 6    | 6    | 4    | 5    | 5    | 20                                  | 3    | 1    | 4    | 3    | 1    | 3    | 34                                  | 0    | 6    | 1    | 4    | 6    | 6    | 44                                  | 5    | 5    | 5    | 5    | 5    | 3    |
|            | 26                                                                                                  | 2    | 2    | 2    | 0    | 0    | 0    | 25                                  | 3    | 6    | 4    | 5    | 5    | 4    | 37                                  | 6    | 4    | 5    | 5    | 5    | 5    | 48                                  | 5    | 4    | 6    | 4    | 4    | 3    |
|            | 33                                                                                                  | 6    | 6    | 6    | 6    | 6    | 6    | 35                                  | 5    | 6    | 5    | 5    | 5    | 4    | 45                                  | 6    | 6    | 6    | 4    | 5    | 6    | 49                                  | 5    | 6    | 6    | 5    | 4    | 3    |
| 05/25/2022 | 1                                                                                                   | 6    | 6    | 6    | 5    | 5    | 5    | 13                                  | 1    | 6    | 6    | 4    | 4    | 4    | 22                                  | 6    | 6    | 6    | 5    | 5    | 5    | 10                                  | 5    | 5    | 5    | 5    | 5    | 5    |
|            | 2                                                                                                   | 1    | 4    | 1    | 3    | 6    | 1    | 14                                  | 1    | 1    | 3    | 5    | 4    | 4    | 23                                  | 1    | 1    | 1    | 1    | 1    | 1    | 16                                  | 5    | 5    | 5    | 1    | 3    | 4    |
|            | 4                                                                                                   | 5    | 6    | 1    | 6    | 6    | 6    | 15                                  | 5    | 5    | 4    | 4    | 4    | 4    | 27                                  | 6    | 5    | 5    | 5    | 5    | 5    | 21                                  | 6    | 6    | 6    | 5    | 6    | 6    |
|            | 5                                                                                                   | 5    | 6    | 1    | 5    | 5    | 4    | 17                                  | 5    | 6    | 6    | 5    | 4    | 4    | 28                                  | 6    | 5    | 6    | 5    | 5    | 6    | 38                                  | 5    | 5    | 5    | 4    | 4    | 4    |
|            | 7                                                                                                   | 6    | 5    | 6    | 5    | 5    | 5    | 18                                  | 6    | 6    | 0    | 0    | 0    | 0    | 29                                  | 6    | 6    | 6    | 6    | 5    | 0    | 40                                  | 6    | 6    | 6    | 5    | 5    | 5    |
|            | 8                                                                                                   | 2    | 2    | 6    | 4    | 3    | 5    | 3                                   | 3    | 1    | 1    | 4    | 1    | 4    | 30                                  | 6    | 6    | 5    | 5    | 6    | 3    | 41                                  | 5    | 5    | 5    | 5    | 0    | 5    |
|            | 6                                                                                                   | 4    | 5    | 5    | 4    | 4    | 5    | 19                                  | 3    | 6    | 6    | 5    | 4    | 5    | 31                                  | 6    | 6    | 3    | 5    | 4    | 0    | 46                                  | 6    | 6    | 6    | 6    | 6    | 6    |
|            | 12                                                                                                  | 6    | 6    | 6    | 5    | 5    | 5    | 20                                  | 3    | 1    | 5    | 4    | 1    | 4    | 34                                  | 0    | 6    | 1    | 4    | 6    | 6    | 44                                  | 5    | 6    | 5    | 5    | 5    | 4    |
|            | 26                                                                                                  | 2    | 2    | 2    | 0    | 0    | 0    | 25                                  | 3    | 6    | 5    | 5    | 5    | 5    | 37                                  | 6    | 5    | 6    | 5    | 5    | 5    | 48                                  | 5    | 4    | 6    | 4    | 4    | 4    |
|            | 33                                                                                                  | 6    | 6    | 6    | 6    | 6    | 6    | 35                                  | 6    | 6    | 6    | 5    | 5    | 5    | 45                                  | 6    | 6    | 6    | 4    | 6    | 5    | 49                                  | 6    | 6    | 6    | 5    | 5    | 4    |

|            |    |   |   |   |   |   |   |    |   |   |   |   |   |   |    |   |   |   |   |   |   |    |   |   |   |   |   |   |
|------------|----|---|---|---|---|---|---|----|---|---|---|---|---|---|----|---|---|---|---|---|---|----|---|---|---|---|---|---|
| 05/28/2022 | 1  | 6 | 6 | 6 | 5 | 5 | 5 | 13 | 1 | 6 | 6 | 5 | 4 | 4 | 22 | 6 | 6 | 6 | 5 | 5 | 5 | 10 | 5 | 5 | 5 | 5 | 5 | 5 |
|            | 2  | 1 | 5 | 1 | 4 | 6 | 1 | 14 | 1 | 1 | 3 | 5 | 5 | 5 | 23 | 1 | 1 | 1 | 1 | 1 | 1 | 16 | 5 | 5 | 5 | 1 | 3 | 4 |
|            | 4  | 6 | 6 | 1 | 6 | 6 | 6 | 15 | 6 | 6 | 5 | 5 | 5 | 5 | 27 | 6 | 6 | 6 | 5 | 5 | 5 | 21 | 6 | 6 | 6 | 6 | 6 | 6 |
|            | 5  | 5 | 6 | 1 | 5 | 5 | 4 | 17 | 6 | 6 | 6 | 5 | 5 | 4 | 28 | 6 | 6 | 6 | 5 | 5 | 6 | 38 | 6 | 6 | 5 | 4 | 4 | 4 |
|            | 7  | 6 | 6 | 6 | 5 | 5 | 5 | 18 | 6 | 6 | 0 | 0 | 0 | 0 | 29 | 6 | 6 | 6 | 6 | 5 | 0 | 40 | 6 | 6 | 6 | 5 | 5 | 5 |
|            | 8  | 2 | 2 | 6 | 5 | 3 | 5 | 3  | 3 | 1 | 1 | 5 | 1 | 4 | 30 | 6 | 6 | 6 | 5 | 6 | 3 | 41 | 6 | 6 | 6 | 6 | 0 | 6 |
|            | 6  | 4 | 5 | 5 | 5 | 5 | 5 | 19 | 3 | 6 | 6 | 5 | 4 | 5 | 31 | 6 | 6 | 3 | 5 | 5 | 0 | 46 | 6 | 6 | 6 | 6 | 6 | 6 |
|            | 12 | 6 | 6 | 6 | 5 | 5 | 5 | 20 | 3 | 1 | 6 | 4 | 1 | 4 | 34 | 0 | 6 | 1 | 4 | 6 | 6 | 44 | 6 | 6 | 6 | 5 | 5 | 4 |
|            | 26 | 2 | 2 | 2 | 0 | 0 | 0 | 25 | 3 | 6 | 6 | 5 | 5 | 5 | 37 | 6 | 5 | 6 | 5 | 5 | 5 | 48 | 6 | 6 | 6 | 4 | 4 | 4 |
|            | 33 | 6 | 6 | 6 | 6 | 6 | 6 | 35 | 6 | 6 | 6 | 5 | 5 | 5 | 45 | 6 | 6 | 6 | 4 | 6 | 5 | 49 | 6 | 6 | 6 | 5 | 5 | 5 |
| 05/31/2022 | 1  | 6 | 6 | 6 | 6 | 5 | 5 | 13 | 1 | 6 | 6 | 5 | 5 | 5 | 22 | 6 | 6 | 6 | 5 | 5 | 5 | 10 | 6 | 6 | 6 | 6 | 5 | 5 |
|            | 2  | 1 | 6 | 3 | 6 | 6 | 1 | 14 | 1 | 1 | 3 | 5 | 5 | 5 | 23 | 1 | 1 | 1 | 1 | 1 | 1 | 16 | 6 | 6 | 6 | 1 | 6 | 6 |
|            | 4  | 6 | 6 | 1 | 6 | 6 | 6 | 15 | 6 | 6 | 6 | 5 | 5 | 5 | 27 | 6 | 6 | 6 | 5 | 5 | 5 | 21 | 6 | 6 | 6 | 6 | 6 | 6 |
|            | 5  | 6 | 6 | 1 | 5 | 6 | 5 | 17 | 6 | 6 | 6 | 5 | 5 | 5 | 28 | 6 | 6 | 6 | 5 | 5 | 6 | 38 | 6 | 6 | 5 | 4 | 4 | 4 |
|            | 7  | 6 | 6 | 6 | 5 | 6 | 5 | 18 | 6 | 6 | 0 | 0 | 0 | 0 | 29 | 6 | 6 | 6 | 6 | 5 | 0 | 40 | 6 | 6 | 6 | 5 | 5 | 5 |
|            | 8  | 2 | 2 | 6 | 5 | 3 | 5 | 3  | 3 | 1 | 1 | 5 | 1 | 4 | 30 | 6 | 6 | 6 | 5 | 6 | 5 | 41 | 6 | 6 | 6 | 6 | 0 | 6 |
|            | 6  | 6 | 6 | 6 | 5 | 5 | 5 | 19 | 3 | 6 | 6 | 5 | 5 | 6 | 31 | 6 | 6 | 3 | 6 | 5 | 0 | 46 | 6 | 6 | 6 | 6 | 6 | 6 |
|            | 12 | 6 | 6 | 6 | 5 | 5 | 5 | 20 | 5 | 1 | 6 | 5 | 1 | 4 | 34 | 0 | 6 | 1 | 4 | 6 | 6 | 44 | 6 | 6 | 6 | 5 | 5 | 5 |
|            | 26 | 2 | 2 | 2 | 0 | 0 | 0 | 25 | 3 | 6 | 6 | 5 | 5 | 5 | 37 | 6 | 5 | 6 | 5 | 5 | 5 | 48 | 6 | 6 | 6 | 5 | 5 | 5 |
|            | 33 | 6 | 6 | 6 | 6 | 6 | 6 | 35 | 6 | 6 | 6 | 5 | 5 | 5 | 45 | 6 | 6 | 6 | 4 | 6 | 6 | 49 | 6 | 6 | 6 | 5 | 5 | 5 |
| 06/03/2022 | 1  | 6 | 6 | 6 | 6 | 6 | 6 | 13 | 1 | 6 | 6 | 5 | 5 | 5 | 22 | 6 | 6 | 6 | 6 | 6 | 5 | 10 | 6 | 6 | 6 | 6 | 6 | 6 |
|            | 2  | 3 | 6 | 3 | 6 | 6 | 1 | 14 | 1 | 1 | 4 | 6 | 5 | 5 | 23 | 1 | 1 | 1 | 1 | 1 | 1 | 16 | 6 | 6 | 6 | 1 | 6 | 6 |
|            | 4  | 6 | 6 | 1 | 6 | 6 | 6 | 15 | 6 | 6 | 6 | 6 | 5 | 6 | 27 | 6 | 6 | 6 | 6 | 6 | 6 | 21 | 6 | 6 | 6 | 6 | 6 | 6 |
|            | 5  | 6 | 6 | 1 | 6 | 6 | 5 | 17 | 6 | 6 | 6 | 6 | 6 | 6 | 28 | 6 | 6 | 6 | 5 | 6 | 6 | 38 | 6 | 6 | 6 | 4 | 4 | 4 |
|            | 7  | 6 | 6 | 6 | 6 | 6 | 6 | 18 | 6 | 6 | 0 | 0 | 0 | 0 | 29 | 6 | 6 | 6 | 6 | 5 | 0 | 40 | 6 | 6 | 6 | 6 | 6 | 6 |
|            | 8  | 2 | 2 | 6 | 5 | 3 | 6 | 3  | 4 | 1 | 1 | 5 | 1 | 5 | 30 | 6 | 6 | 6 | 5 | 6 | 5 | 41 | 6 | 6 | 6 | 6 | 0 | 6 |
|            | 6  | 6 | 6 | 6 | 5 | 6 | 6 | 19 | 4 | 6 | 6 | 5 | 5 | 6 | 31 | 6 | 6 | 3 | 6 | 6 | 0 | 46 | 6 | 6 | 6 | 6 | 6 | 6 |
|            | 12 | 6 | 6 | 6 | 6 | 6 | 6 | 20 | 6 | 1 | 6 | 5 | 1 | 4 | 34 | 0 | 6 | 1 | 4 | 6 | 6 | 44 | 6 | 6 | 6 | 5 | 5 | 5 |
|            | 26 | 2 | 2 | 2 | 0 | 0 | 0 | 25 | 3 | 6 | 6 | 6 | 6 | 6 | 37 | 6 | 6 | 6 | 6 | 6 | 6 | 48 | 6 | 6 | 6 | 5 | 5 | 5 |
|            | 33 | 6 | 6 | 6 | 6 | 6 | 6 | 35 | 6 | 6 | 6 | 6 | 6 | 6 | 45 | 6 | 6 | 6 | 4 | 6 | 6 | 49 | 6 | 6 | 6 | 6 | 5 | 5 |
| 06/06/2022 | 1  | 6 | 6 | 6 | 6 | 6 | 6 | 13 | 1 | 6 | 6 | 5 | 6 | 5 | 22 | 6 | 6 | 6 | 6 | 6 | 6 | 10 | 6 | 6 | 6 | 6 | 6 | 6 |
|            | 2  | 5 | 6 | 5 | 6 | 6 | 1 | 14 | 1 | 1 | 4 | 6 | 6 | 6 | 23 | 1 | 1 | 1 | 1 | 1 | 1 | 16 | 6 | 6 | 6 | 1 | 6 | 6 |
|            | 4  | 6 | 6 | 1 | 6 | 6 | 6 | 15 | 6 | 6 | 6 | 6 | 5 | 6 | 27 | 6 | 6 | 6 | 6 | 6 | 6 | 21 | 6 | 6 | 6 | 6 | 6 | 6 |
|            | 5  | 6 | 6 | 1 | 6 | 6 | 6 | 17 | 6 | 6 | 6 | 6 | 6 | 6 | 28 | 6 | 6 | 6 | 5 | 6 | 6 | 38 | 6 | 6 | 6 | 5 | 5 | 5 |
|            | 7  | 6 | 6 | 6 | 6 | 6 | 6 | 18 | 6 | 6 | 0 | 0 | 0 | 0 | 29 | 6 | 6 | 6 | 6 | 6 | 0 | 40 | 6 | 6 | 6 | 6 | 6 | 6 |
|            | 8  | 2 | 2 | 6 | 6 | 4 | 6 | 3  | 4 | 1 | 1 | 5 | 1 | 5 | 30 | 6 | 6 | 6 | 6 | 6 | 5 | 41 | 6 | 6 | 6 | 6 | 0 | 6 |
|            | 6  | 6 | 6 | 6 | 6 | 6 | 6 | 19 | 4 | 6 | 6 | 6 | 6 | 6 | 31 | 6 | 6 | 3 | 6 | 6 | 0 | 46 | 6 | 6 | 6 | 6 | 6 | 6 |
|            | 12 | 6 | 6 | 6 | 6 | 6 | 6 | 20 | 6 | 1 | 6 | 6 | 1 | 4 | 34 | 0 | 6 | 1 | 5 | 6 | 6 | 44 | 6 | 6 | 6 | 6 | 5 | 5 |
|            | 26 | 2 | 2 | 2 | 0 | 0 | 0 | 25 | 3 | 6 | 6 | 6 | 6 | 6 | 37 | 6 | 6 | 6 | 6 | 6 | 6 | 48 | 6 | 6 | 6 | 6 | 6 | 6 |
|            | 33 | 6 | 6 | 6 | 6 | 6 | 6 | 35 | 6 | 6 | 6 | 6 | 6 | 6 | 45 | 6 | 6 | 6 | 4 | 6 | 6 | 49 | 6 | 6 | 6 | 6 | 5 | 5 |
| 06/09/2022 | 1  | 6 | 6 | 6 | 7 | 7 | 7 | 13 | 1 | 6 | 6 | 6 | 6 | 6 | 22 | 6 | 6 | 6 | 6 | 6 | 6 | 10 | 6 | 6 | 6 | 6 | 6 | 6 |
|            | 2  | 6 | 6 | 6 | 6 | 6 | 1 | 14 | 1 | 1 | 5 | 6 | 6 | 6 | 23 | 1 | 1 | 1 | 1 | 1 | 1 | 16 | 6 | 6 | 6 | 1 | 6 | 6 |
|            | 4  | 6 | 6 | 1 | 6 | 6 | 6 | 15 | 6 | 6 | 6 | 6 | 5 | 6 | 27 | 6 | 6 | 6 | 6 | 6 | 6 | 21 | 6 | 6 | 6 | 6 | 6 | 6 |
|            | 5  | 6 | 6 | 1 | 6 | 6 | 6 | 17 | 6 | 6 | 6 | 6 | 6 | 6 | 28 | 6 | 6 | 6 | 6 | 6 | 6 | 38 | 6 | 6 | 6 | 6 | 5 | 5 |
|            | 7  | 6 | 6 | 6 | 6 | 6 | 6 | 18 | 6 | 6 | 0 | 0 | 0 | 0 | 29 | 6 | 6 | 6 | 6 | 6 | 0 | 40 | 6 | 6 | 6 | 6 | 6 | 6 |
|            | 8  | 2 | 3 | 6 | 6 | 5 | 6 | 3  | 4 | 1 | 1 | 6 | 1 | 5 | 30 | 6 | 6 | 6 | 6 | 6 | 6 | 41 | 6 | 6 | 6 | 6 | 0 | 6 |
|            | 6  | 6 | 6 | 6 | 6 | 6 | 6 | 19 | 4 | 6 | 6 | 6 | 6 | 6 | 31 | 6 | 6 | 4 | 6 | 6 | 0 | 46 | 6 | 6 | 6 | 6 | 6 | 6 |
|            | 12 | 6 | 6 | 6 | 7 | 6 | 6 | 20 | 6 | 1 | 6 | 6 | 1 | 4 | 34 | 0 | 6 | 1 | 6 | 6 | 6 | 44 | 6 | 6 | 6 | 6 | 6 | 5 |
|            | 26 | 2 | 2 | 2 | 0 | 0 | 0 | 25 | 3 | 6 | 6 | 6 | 6 | 6 | 37 | 6 | 6 | 6 | 6 | 6 | 6 | 48 | 6 | 6 | 6 | 6 | 6 | 6 |
|            | 33 | 6 | 6 | 6 | 6 | 6 | 6 | 35 | 6 | 6 | 6 | 6 | 6 | 6 | 45 | 6 | 6 | 6 | 6 | 6 | 6 | 49 | 6 | 6 | 6 | 6 | 6 | 5 |
| 06/12/2022 | 1  | 6 | 6 | 6 | 7 | 7 | 7 | 13 | 1 | 6 | 6 | 6 | 6 | 6 | 22 | 6 | 6 | 6 | 7 | 6 | 6 | 10 | 6 | 6 | 6 | 6 | 6 | 6 |
|            | 2  | 6 | 6 | 6 | 6 | 6 | 1 | 14 | 1 | 1 | 6 | 7 | 7 | 6 | 23 | 1 | 1 | 1 | 1 | 1 | 1 | 16 | 6 | 6 | 6 | 1 | 6 | 6 |
|            | 4  | 6 | 6 | 1 | 7 | 7 | 7 | 15 | 6 | 6 | 6 | 7 | 6 | 6 | 27 | 6 | 6 | 6 | 7 | 7 | 6 | 21 | 6 | 6 | 6 | 6 | 6 | 6 |
|            | 5  | 6 | 6 | 1 | 7 | 7 | 6 | 17 | 6 | 6 | 6 | 6 | 6 | 6 | 28 | 6 | 6 | 6 | 6 | 6 | 6 | 38 | 6 | 6 | 6 | 6 | 5 | 5 |
|            | 7  | 6 | 6 | 6 | 7 | 7 | 7 | 18 | 6 | 6 | 0 | 0 | 0 | 0 | 29 | 6 | 6 | 6 | 7 | 6 | 0 | 40 | 6 | 6 | 6 | 6 | 6 | 6 |
|            | 8  | 2 | 3 | 6 | 6 | 6 | 7 | 3  | 5 | 1 | 1 | 6 | 1 | 6 | 30 | 6 | 6 | 6 | 7 | 7 | 7 | 41 | 6 | 6 | 6 | 6 | 0 | 6 |
|            | 6  | 6 | 6 | 6 | 6 | 7 | 7 | 19 | 6 | 6 | 6 | 6 | 6 | 6 | 31 | 6 | 6 | 5 | 6 | 6 | 0 | 46 | 6 | 6 | 6 | 6 | 6 | 6 |
|            | 12 | 6 | 6 | 6 | 7 | 7 | 7 | 20 | 6 | 1 | 6 | 6 | 1 | 5 | 34 | 0 | 6 | 1 | 6 | 6 | 6 | 44 | 6 | 6 | 6 | 6 | 6 | 5 |
|            | 26 | 2 | 2 | 2 | 0 | 0 | 0 | 25 | 3 | 6 | 6 | 7 | 7 | 6 | 37 | 6 | 6 | 6 | 6 | 6 | 6 | 48 | 6 | 6 | 6 | 6 | 6 | 6 |
|            | 33 | 6 | 6 | 6 | 6 | 6 | 6 | 35 | 6 | 6 |   |   |   |   |    |   |   |   |   |   |   |    |   |   |   |   |   |   |

|            |    |   |   |   |   |    |    |    |    |   |   |   |   |   |    |    |   |   |   |   |   |    |    |   |   |   |   |   |   |
|------------|----|---|---|---|---|----|----|----|----|---|---|---|---|---|----|----|---|---|---|---|---|----|----|---|---|---|---|---|---|
| 06/18/2022 | 1  | 6 | 6 | 6 | 8 | 8  | 7  | 13 | 1  | 6 | 6 | 6 | 7 | 6 | 22 | 6  | 6 | 6 | 8 | 8 | 7 | 10 | 6  | 6 | 6 | 6 | 6 | 6 |   |
|            | 2  | 6 | 6 | 6 | 6 | 6  | 1  | 14 | 1  | 1 | 6 | 7 | 7 | 6 | 23 | 1  | 1 | 1 | 1 | 1 | 1 | 16 | 6  | 6 | 6 | 1 | 6 | 6 |   |
|            | 4  | 6 | 6 | 6 | 1 | 7  | 7  | 8  | 15 | 6 | 6 | 6 | 7 | 7 | 27 | 6  | 6 | 6 | 7 | 7 | 7 | 21 | 6  | 6 | 6 | 6 | 6 | 6 |   |
|            | 5  | 6 | 6 | 6 | 1 | 8  | 8  | 7  | 17 | 6 | 6 | 6 | 7 | 7 | 28 | 6  | 6 | 6 | 7 | 7 | 7 | 38 | 6  | 6 | 6 | 6 | 6 | 6 |   |
|            | 7  | 6 | 6 | 6 | 6 | 7  | 8  | 8  | 18 | 6 | 6 | 0 | 0 | 0 | 29 | 6  | 6 | 6 | 8 | 7 | 0 | 40 | 6  | 6 | 6 | 7 | 7 | 7 |   |
|            | 8  | 6 | 6 | 6 | 6 | 8  | 6  | 7  | 3  | 6 | 1 | 1 | 7 | 1 | 6  | 30 | 6 | 6 | 6 | 7 | 7 | 41 | 6  | 6 | 6 | 7 | 0 | 6 |   |
|            | 6  | 6 | 6 | 6 | 6 | 7  | 7  | 8  | 19 | 6 | 6 | 6 | 8 | 7 | 8  | 31 | 6 | 6 | 5 | 7 | 7 | 0  | 46 | 6 | 6 | 6 | 6 | 6 |   |
|            | 12 | 6 | 6 | 6 | 6 | 8  | 8  | 7  | 20 | 6 | 1 | 6 | 6 | 1 | 6  | 34 | 0 | 6 | 1 | 6 | 6 | 6  | 44 | 6 | 6 | 6 | 6 | 6 |   |
|            | 26 | 2 | 2 | 2 | 0 | 0  | 0  | 25 | 3  | 6 | 6 | 6 | 7 | 7 | 37 | 6  | 6 | 6 | 7 | 7 | 7 | 48 | 6  | 6 | 6 | 6 | 6 | 6 |   |
|            | 33 | 6 | 6 | 6 | 6 | 6  | 6  | 6  | 35 | 6 | 6 | 6 | 7 | 7 | 45 | 6  | 6 | 6 | 7 | 7 | 8 | 49 | 6  | 6 | 6 | 7 | 7 | 7 |   |
| 06/21/2022 | 1  | 6 | 6 | 6 | 8 | 8  | 8  | 13 | 1  | 6 | 6 | 6 | 7 | 6 | 22 | 6  | 6 | 6 | 8 | 8 | 8 | 10 | 6  | 6 | 6 | 8 | 8 | 7 |   |
|            | 2  | 6 | 6 | 6 | 6 | 6  | 1  | 14 | 1  | 1 | 6 | 8 | 8 | 7 | 23 | 1  | 1 | 1 | 1 | 1 | 1 | 16 | 6  | 6 | 6 | 1 | 6 | 6 |   |
|            | 4  | 6 | 6 | 6 | 1 | 8  | 8  | 8  | 15 | 6 | 6 | 6 | 8 | 8 | 27 | 6  | 6 | 6 | 7 | 8 | 8 | 21 | 6  | 6 | 6 | 6 | 6 | 6 |   |
|            | 5  | 6 | 6 | 6 | 1 | 8  | 8  | 7  | 17 | 6 | 6 | 6 | 7 | 7 | 28 | 6  | 6 | 6 | 8 | 7 | 7 | 38 | 6  | 6 | 6 | 6 | 7 | 6 |   |
|            | 7  | 6 | 6 | 6 | 6 | 7  | 8  | 8  | 18 | 6 | 6 | 0 | 0 | 0 | 29 | 6  | 6 | 6 | 8 | 7 | 0 | 40 | 6  | 6 | 6 | 7 | 7 | 7 |   |
|            | 8  | 6 | 6 | 6 | 6 | 8  | 6  | 7  | 3  | 5 | 1 | 1 | 7 | 1 | 30 | 6  | 6 | 6 | 7 | 7 | 7 | 41 | 6  | 6 | 6 | 7 | 0 | 6 |   |
|            | 6  | 6 | 6 | 6 | 6 | 8  | 7  | 8  | 19 | 6 | 6 | 6 | 8 | 7 | 8  | 31 | 6 | 6 | 6 | 7 | 7 | 0  | 46 | 6 | 6 | 6 | 6 | 6 |   |
|            | 12 | 6 | 6 | 6 | 6 | 8  | 8  | 8  | 20 | 6 | 1 | 6 | 8 | 1 | 7  | 34 | 0 | 6 | 1 | 6 | 6 | 6  | 44 | 6 | 6 | 6 | 7 | 7 |   |
|            | 26 | 2 | 2 | 2 | 0 | 0  | 0  | 25 | 3  | 6 | 6 | 6 | 8 | 8 | 37 | 6  | 6 | 6 | 7 | 7 | 7 | 48 | 6  | 6 | 6 | 6 | 6 | 6 |   |
|            | 33 | 6 | 6 | 6 | 6 | 6  | 6  | 6  | 35 | 6 | 6 | 6 | 7 | 8 | 45 | 6  | 6 | 6 | 7 | 7 | 8 | 49 | 6  | 6 | 6 | 7 | 7 | 7 |   |
| 06/24/2022 | 1  | 6 | 6 | 6 | 9 | 8  | 8  | 13 | 1  | 6 | 6 | 8 | 7 | 7 | 22 | 6  | 6 | 6 | 9 | 9 | 9 | 10 | 6  | 6 | 6 | 8 | 8 | 8 |   |
|            | 2  | 6 | 6 | 6 | 6 | 6  | 1  | 14 | 1  | 1 | 6 | 8 | 8 | 8 | 23 | 1  | 1 | 1 | 1 | 1 | 1 | 16 | 6  | 6 | 6 | 1 | 6 | 6 |   |
|            | 4  | 6 | 6 | 6 | 1 | 8  | 8  | 8  | 15 | 6 | 6 | 6 | 9 | 9 | 27 | 6  | 6 | 6 | 8 | 9 | 8 | 21 | 6  | 6 | 6 | 6 | 6 | 6 |   |
|            | 5  | 6 | 6 | 6 | 1 | 9  | 9  | 7  | 17 | 6 | 6 | 6 | 8 | 8 | 28 | 6  | 6 | 6 | 8 | 9 | 8 | 38 | 6  | 6 | 6 | 6 | 8 | 6 |   |
|            | 7  | 6 | 6 | 6 | 6 | 9  | 8  | 8  | 18 | 6 | 6 | 0 | 0 | 0 | 29 | 6  | 6 | 6 | 9 | 8 | 0 | 40 | 6  | 6 | 6 | 7 | 8 | 8 |   |
|            | 8  | 6 | 6 | 6 | 6 | 9  | 7  | 7  | 3  | 6 | 1 | 1 | 8 | 1 | 8  | 30 | 6 | 6 | 6 | 8 | 7 | 8  | 41 | 6 | 6 | 6 | 7 | 0 | 6 |
|            | 6  | 6 | 6 | 6 | 6 | 8  | 8  | 8  | 19 | 6 | 6 | 6 | 9 | 9 | 8  | 31 | 6 | 6 | 6 | 7 | 8 | 0  | 46 | 6 | 6 | 6 | 6 | 6 |   |
|            | 12 | 6 | 6 | 6 | 6 | 9  | 9  | 9  | 20 | 6 | 1 | 6 | 8 | 1 | 8  | 34 | 0 | 6 | 1 | 6 | 6 | 6  | 44 | 6 | 6 | 6 | 8 | 8 | 7 |
|            | 26 | 2 | 2 | 2 | 0 | 0  | 0  | 25 | 3  | 6 | 6 | 6 | 9 | 9 | 8  | 37 | 6 | 6 | 6 | 8 | 8 | 8  | 48 | 6 | 6 | 6 | 7 | 7 | 7 |
|            | 33 | 6 | 6 | 6 | 6 | 6  | 6  | 6  | 35 | 6 | 6 | 6 | 8 | 8 | 45 | 6  | 6 | 6 | 7 | 7 | 8 | 49 | 6  | 6 | 6 | 7 | 7 | 7 |   |
| 06/27/2022 | 1  | 6 | 6 | 6 | 9 | 9  | 9  | 13 | 1  | 6 | 6 | 9 | 9 | 9 | 22 | 6  | 6 | 6 | 9 | 9 | 9 | 10 | 6  | 6 | 6 | 9 | 8 | 8 |   |
|            | 2  | 6 | 6 | 6 | 6 | 6  | 1  | 14 | 1  | 1 | 6 | 9 | 9 | 9 | 23 | 1  | 1 | 1 | 1 | 1 | 1 | 16 | 6  | 6 | 6 | 1 | 6 | 6 |   |
|            | 4  | 6 | 6 | 6 | 1 | 9  | 9  | 9  | 15 | 6 | 6 | 6 | 9 | 9 | 9  | 27 | 6 | 6 | 6 | 9 | 9 | 9  | 21 | 6 | 6 | 6 | 6 | 6 | 6 |
|            | 5  | 6 | 6 | 6 | 1 | 9  | 9  | 9  | 17 | 6 | 6 | 6 | 9 | 8 | 9  | 28 | 6 | 6 | 6 | 9 | 9 | 8  | 38 | 6 | 6 | 6 | 8 | 9 | 6 |
|            | 7  | 6 | 6 | 6 | 6 | 9  | 9  | 9  | 18 | 6 | 6 | 0 | 0 | 0 | 0  | 29 | 6 | 6 | 6 | 9 | 9 | 0  | 40 | 6 | 6 | 6 | 8 | 9 | 8 |
|            | 8  | 6 | 6 | 6 | 6 | 9  | 7  | 9  | 3  | 6 | 1 | 1 | 9 | 1 | 9  | 30 | 6 | 6 | 6 | 9 | 9 | 9  | 41 | 6 | 6 | 6 | 8 | 0 | 6 |
|            | 6  | 6 | 6 | 6 | 6 | 9  | 9  | 9  | 19 | 6 | 6 | 6 | 9 | 9 | 8  | 31 | 6 | 6 | 6 | 9 | 9 | 0  | 46 | 6 | 6 | 6 | 6 | 6 | 6 |
|            | 12 | 6 | 6 | 6 | 6 | 10 | 10 | 10 | 20 | 6 | 1 | 6 | 9 | 1 | 9  | 34 | 0 | 6 | 1 | 6 | 6 | 6  | 44 | 6 | 6 | 6 | 8 | 8 | 7 |
|            | 26 | 2 | 2 | 2 | 0 | 0  | 0  | 25 | 3  | 6 | 6 | 9 | 9 | 9 | 37 | 6  | 6 | 6 | 9 | 9 | 9 | 48 | 6  | 6 | 6 | 6 | 8 | 8 | 8 |
|            | 33 | 6 | 6 | 6 | 6 | 6  | 6  | 6  | 35 | 6 | 6 | 6 | 9 | 9 | 9  | 45 | 6 | 6 | 6 | 9 | 8 | 9  | 49 | 6 | 6 | 6 | 8 | 8 | 8 |
| 06/30/2022 | 1  | 6 | 6 | 6 | 9 | 9  | 9  | 13 | 1  | 6 | 6 | 9 | 9 | 9 | 22 | 6  | 6 | 6 | 9 | 9 | 9 | 10 | 6  | 6 | 6 | 9 | 9 | 9 |   |
|            | 2  | 6 | 6 | 6 | 6 | 6  | 1  | 14 | 1  | 1 | 6 | 9 | 9 | 9 | 23 | 1  | 1 | 1 | 1 | 1 | 1 | 16 | 6  | 6 | 6 | 1 | 6 | 6 |   |
|            | 4  | 6 | 6 | 6 | 1 | 9  | 9  | 9  | 15 | 6 | 6 | 6 | 9 | 9 | 9  | 27 | 6 | 6 | 6 | 9 | 9 | 9  | 21 | 6 | 6 | 6 | 6 | 6 | 6 |
|            | 5  | 6 | 6 | 6 | 1 | 9  | 9  | 9  | 17 | 6 | 6 | 6 | 9 | 9 | 9  | 28 | 6 | 6 | 6 | 9 | 9 | 9  | 38 | 6 | 6 | 6 | 6 | 9 | 6 |
|            | 7  | 6 | 6 | 6 | 6 | 9  | 9  | 9  | 18 | 6 | 6 | 0 | 0 | 0 | 0  | 29 | 6 | 6 | 6 | 9 | 9 | 0  | 40 | 6 | 6 | 6 | 9 | 9 | 9 |
|            | 8  | 6 | 6 | 6 | 6 | 9  | 8  | 9  | 3  | 6 | 1 | 1 | 9 | 1 | 9  | 30 | 6 | 6 | 6 | 9 | 9 | 9  | 41 | 6 | 6 | 6 | 9 | 0 | 6 |
|            | 6  | 6 | 6 | 6 | 6 | 9  | 9  | 9  | 19 | 6 | 6 | 6 | 9 | 9 | 8  | 31 | 6 | 6 | 6 | 9 | 9 | 0  | 46 | 6 | 6 | 6 | 6 | 6 | 6 |
|            | 12 | 6 | 6 | 6 | 6 | 10 | 10 | 10 | 20 | 6 | 1 | 6 | 9 | 1 | 9  | 34 | 0 | 6 | 1 | 6 | 6 | 6  | 44 | 6 | 6 | 6 | 9 | 9 | 8 |
|            | 26 | 2 | 2 | 2 | 0 | 0  | 0  | 25 | 3  | 6 | 6 | 9 | 9 | 9 | 37 | 6  | 6 | 6 | 9 | 9 | 9 | 48 | 6  | 6 | 6 | 6 | 8 | 8 | 8 |
|            | 33 | 6 | 6 | 6 | 6 | 6  | 6  | 6  | 35 | 6 | 6 | 6 | 9 | 9 | 9  | 45 | 6 | 6 | 6 | 9 | 9 | 9  | 49 | 6 | 6 | 6 | 6 | 9 | 9 |
| 07/03/2022 | 1  | 6 | 6 | 6 | 9 | 9  | 9  | 13 | 1  | 6 | 6 | 9 | 9 | 9 | 22 | 6  | 6 | 6 | 9 | 9 | 9 | 10 | 6  | 6 | 6 | 9 | 9 | 9 |   |
|            | 2  | 6 | 6 | 6 | 6 | 6  | 1  | 14 | 1  | 1 | 6 | 9 | 9 | 9 | 23 | 1  | 1 | 1 | 1 | 1 | 1 | 16 | 6  | 6 | 6 | 1 | 6 | 6 |   |
|            | 4  | 6 | 6 | 6 | 1 | 9  | 9  | 9  | 15 | 6 | 6 | 6 | 9 | 9 | 9  | 27 | 6 | 6 | 6 | 9 | 9 | 9  | 21 | 6 | 6 | 6 | 6 | 6 | 6 |
|            | 5  | 6 | 6 | 6 | 1 | 9  | 9  | 9  | 17 | 6 | 6 | 6 | 9 | 9 | 9  | 28 | 6 | 6 | 6 | 9 | 9 | 9  | 38 | 6 | 6 | 6 | 6 | 9 | 6 |
|            | 7  | 6 | 6 | 6 | 6 | 9  | 9  | 9  | 18 | 6 | 6 | 0 | 0 | 0 | 0  | 29 | 6 | 6 | 6 | 9 | 9 | 0  | 40 | 6 | 6 | 6 | 9 | 9 | 9 |
|            | 8  | 6 | 6 | 6 | 6 | 9  | 8  | 9  | 3  | 6 | 1 | 1 | 9 | 1 | 9  | 30 | 6 | 6 | 6 | 9 | 9 | 9  | 41 | 6 | 6 | 6 | 9 | 0 | 6 |
|            | 6  | 6 | 6 | 6 | 6 | 9  | 9  | 9  | 19 | 6 | 6 | 6 | 9 | 9 | 8  | 31 | 6 | 6 | 6 | 9 | 9 | 0  | 46 | 6 | 6 | 6 | 6 | 6 | 6 |
|            | 12 | 6 | 6 | 6 | 6 | 10 | 10 | 10 | 20 | 6 | 1 | 6 | 9 | 1 | 9  | 34 | 0 | 6 | 1 | 6 | 6 | 6  | 44 | 6 | 6 | 6 | 9 | 9 | 9 |
|            | 26 | 2 | 2 | 2 | 0 | 0  | 0  | 25 | 3  | 6 | 6 |   |   |   |    |    |   |   |   |   |   |    |    |   |   |   |   |   |   |



|            |    |   |   |   |    |    |    |    |   |   |   |    |    |    |    |   |   |   |    |    |    |    |   |   |   |    |    |    |
|------------|----|---|---|---|----|----|----|----|---|---|---|----|----|----|----|---|---|---|----|----|----|----|---|---|---|----|----|----|
| 07/30/2022 | 1  | 6 | 6 | 6 | 11 | 11 | 11 | 13 | 1 | 6 | 6 | 9  | 9  | 9  | 22 | 6 | 6 | 6 | 10 | 10 | 9  | 10 | 6 | 6 | 6 | 9  | 9  | 9  |
|            | 2  | 6 | 6 | 6 | 6  | 6  | 1  | 14 | 1 | 1 | 6 | 9  | 9  | 9  | 23 | 1 | 1 | 1 | 1  | 1  | 1  | 16 | 6 | 6 | 6 | 1  | 6  | 6  |
|            | 4  | 6 | 6 | 1 | 11 | 11 | 11 | 15 | 6 | 6 | 6 | 11 | 11 | 10 | 27 | 6 | 6 | 6 | 10 | 11 | 10 | 21 | 6 | 6 | 6 | 6  | 6  | 6  |
|            | 5  | 6 | 6 | 1 | 11 | 11 | 11 | 17 | 6 | 6 | 6 | 11 | 11 | 11 | 28 | 6 | 6 | 6 | 10 | 10 | 10 | 38 | 6 | 6 | 6 | 9  | 9  | 6  |
|            | 7  | 6 | 6 | 6 | 11 | 11 | 11 | 18 | 6 | 6 | 0 | 0  | 0  | 0  | 29 | 6 | 6 | 6 | 9  | 10 | 0  | 40 | 6 | 6 | 6 | 9  | 9  | 9  |
|            | 8  | 6 | 6 | 6 | 11 | 11 | 11 | 3  | 6 | 1 | 1 | 9  | 1  | 9  | 30 | 6 | 6 | 6 | 9  | 9  | 9  | 41 | 6 | 6 | 6 | 9  | 0  | 6  |
|            | 6  | 6 | 6 | 6 | 10 | 10 | 11 | 19 | 6 | 6 | 6 | 11 | 10 | 9  | 31 | 6 | 6 | 6 | 9  | 9  | 0  | 46 | 6 | 6 | 6 | 6  | 6  | 6  |
|            | 12 | 6 | 6 | 6 | 10 | 11 | 11 | 20 | 6 | 1 | 6 | 10 | 1  | 9  | 34 | 0 | 6 | 1 | 6  | 6  | 6  | 44 | 6 | 6 | 6 | 9  | 9  | 9  |
|            | 26 | 2 | 2 | 2 | 0  | 0  | 0  | 25 | 3 | 6 | 6 | 11 | 10 | 10 | 37 | 6 | 6 | 6 | 10 | 11 | 11 | 48 | 6 | 6 | 6 | 9  | 9  | 8* |
|            | 33 | 6 | 6 | 6 | 6  | 6  | 6  | 35 | 6 | 6 | 6 | 10 | 9  | 9  | 45 | 6 | 6 | 6 | 9  | 11 | 9  | 49 | 6 | 6 | 6 | 9  | 9  | 8* |
| 08/01/2022 | 1  | 6 | 6 | 6 | 11 | 11 | 11 | 13 | 1 | 6 | 6 | 10 | 10 | 10 | 22 | 6 | 6 | 6 | 10 | 10 | 9  | 10 | 6 | 6 | 6 | 11 | 11 | 10 |
|            | 2  | 6 | 6 | 6 | 6  | 6  | 1  | 14 | 1 | 1 | 6 | 9  | 11 | 9  | 23 | 1 | 1 | 1 | 1  | 1  | 1  | 16 | 6 | 6 | 6 | 1  | 6  | 6  |
|            | 4  | 6 | 6 | 1 | 11 | 11 | 11 | 15 | 6 | 6 | 6 | 11 | 11 | 11 | 27 | 6 | 6 | 6 | 10 | 11 | 10 | 21 | 6 | 6 | 6 | 6  | 6  | 6  |
|            | 5  | 6 | 6 | 1 | 11 | 11 | 11 | 17 | 6 | 6 | 6 | 11 | 11 | 11 | 28 | 6 | 6 | 6 | 11 | 11 | 11 | 38 | 6 | 6 | 6 | 9  | 11 | 6  |
|            | 7  | 6 | 6 | 6 | 11 | 11 | 11 | 18 | 6 | 6 | 0 | 0  | 0  | 0  | 29 | 6 | 6 | 6 | 9  | 11 | 0  | 40 | 6 | 6 | 6 | 9  | 9  | 9  |
|            | 8  | 6 | 6 | 6 | 11 | 11 | 11 | 3  | 6 | 1 | 1 | 9  | 1  | 9  | 30 | 6 | 6 | 6 | 11 | 9  | 9  | 41 | 6 | 6 | 6 | 9  | 0  | 6  |
|            | 6  | 6 | 6 | 6 | 10 | 10 | 11 | 19 | 6 | 6 | 6 | 11 | 10 | 11 | 31 | 6 | 6 | 6 | 9  | 9  | 0  | 46 | 6 | 6 | 6 | 6  | 6  | 6  |
|            | 12 | 6 | 6 | 6 | 10 | 11 | 11 | 20 | 6 | 1 | 6 | 11 | 1  | 10 | 34 | 0 | 6 | 1 | 6  | 6  | 6  | 44 | 6 | 6 | 6 | 9  | 9  | 9  |
|            | 26 | 2 | 2 | 2 | 0  | 0  | 0  | 25 | 3 | 6 | 6 | 11 | 11 | 11 | 37 | 6 | 6 | 6 | 10 | 11 | 11 | 48 | 6 | 6 | 6 | 9  | 9  | 8* |
|            | 33 | 6 | 6 | 6 | 6  | 6  | 6  | 35 | 6 | 6 | 6 | 11 | 10 | 10 | 45 | 6 | 6 | 6 | 9  | 11 | 9  | 49 | 6 | 6 | 6 | 9  | 9  | 8* |
| 08/04/2022 | 1  | 6 | 6 | 6 | 11 | 11 | 11 | 13 | 1 | 6 | 6 | 11 | 11 | 11 | 22 | 6 | 6 | 6 | 11 | 10 | 9  | 10 | 6 | 6 | 6 | 11 | 11 | 10 |
|            | 2  | 6 | 6 | 6 | 6  | 6  | 1  | 14 | 1 | 1 | 6 | 11 | 11 | 10 | 23 | 1 | 1 | 1 | 1  | 1  | 1  | 16 | 6 | 6 | 6 | 1  | 6  | 6  |
|            | 4  | 6 | 6 | 1 | 11 | 11 | 11 | 15 | 6 | 6 | 6 | 11 | 11 | 11 | 27 | 6 | 6 | 6 | 10 | 11 | 11 | 21 | 6 | 6 | 6 | 6  | 6  | 6  |
|            | 5  | 6 | 6 | 1 | 11 | 11 | 11 | 17 | 6 | 6 | 6 | 11 | 11 | 11 | 28 | 6 | 6 | 6 | 11 | 11 | 11 | 38 | 6 | 6 | 6 | 9  | 11 | 6  |
|            | 7  | 6 | 6 | 6 | 11 | 11 | 11 | 18 | 6 | 6 | 0 | 0  | 0  | 0  | 29 | 6 | 6 | 6 | 9  | 11 | 0  | 40 | 6 | 6 | 6 | 9  | 9  | 9  |
|            | 8  | 6 | 6 | 6 | 11 | 11 | 11 | 3  | 6 | 1 | 1 | 10 | 1  | 9  | 30 | 6 | 6 | 6 | 11 | 10 | 9  | 41 | 6 | 6 | 6 | 9  | 0  | 6  |
|            | 6  | 6 | 6 | 6 | 11 | 11 | 11 | 19 | 6 | 6 | 6 | 11 | 10 | 11 | 31 | 6 | 6 | 6 | 9  | 9  | 0  | 46 | 6 | 6 | 6 | 6  | 6  | 6  |
|            | 12 | 6 | 6 | 6 | 10 | 11 | 11 | 20 | 6 | 1 | 6 | 11 | 1  | 11 | 34 | 0 | 6 | 1 | 6  | 6  | 6  | 44 | 6 | 6 | 6 | 9  | 10 | 9  |
|            | 26 | 2 | 2 | 2 | 0  | 0  | 0  | 25 | 3 | 6 | 6 | 11 | 11 | 11 | 37 | 6 | 6 | 6 | 10 | 11 | 11 | 48 | 6 | 6 | 6 | 9  | 9  | 8* |
|            | 33 | 6 | 6 | 6 | 6  | 6  | 6  | 35 | 6 | 6 | 6 | 11 | 11 | 10 | 45 | 6 | 6 | 6 | 10 | 11 | 10 | 49 | 6 | 6 | 6 | 9  | 9  | 8* |
| 08/07/2022 | 1  | 6 | 6 | 6 | 11 | 11 | 11 | 13 | 1 | 6 | 6 | 11 | 11 | 11 | 22 | 6 | 6 | 6 | 11 | 10 | 10 | 10 | 6 | 6 | 6 | 11 | 11 | 10 |
|            | 2  | 6 | 6 | 6 | 6  | 6  | 1  | 14 | 1 | 1 | 6 | 11 | 11 | 10 | 23 | 1 | 1 | 1 | 1  | 1  | 1  | 16 | 6 | 6 | 6 | 1  | 6  | 6  |
|            | 4  | 6 | 6 | 1 | 11 | 11 | 11 | 15 | 6 | 6 | 6 | 11 | 11 | 11 | 27 | 6 | 6 | 6 | 10 | 11 | 11 | 21 | 6 | 6 | 6 | 6  | 6  | 6  |
|            | 5  | 6 | 6 | 1 | 11 | 11 | 11 | 17 | 6 | 6 | 6 | 11 | 11 | 11 | 28 | 6 | 6 | 6 | 11 | 11 | 11 | 38 | 6 | 6 | 6 | 9  | 11 | 6  |
|            | 7  | 6 | 6 | 6 | 11 | 11 | 11 | 18 | 6 | 6 | 0 | 0  | 0  | 0  | 29 | 6 | 6 | 6 | 9  | 11 | 0  | 40 | 6 | 6 | 6 | 9  | 9  | 9  |
|            | 8  | 6 | 6 | 6 | 11 | 11 | 11 | 3  | 6 | 1 | 1 | 10 | 1  | 9  | 30 | 6 | 6 | 6 | 11 | 10 | 9  | 41 | 6 | 6 | 6 | 9  | 0  | 6  |
|            | 6  | 6 | 6 | 6 | 11 | 11 | 11 | 19 | 6 | 6 | 6 | 11 | 11 | 11 | 31 | 6 | 6 | 6 | 9  | 9  | 0  | 46 | 6 | 6 | 6 | 6  | 6  | 6  |
|            | 12 | 6 | 6 | 6 | 11 | 11 | 11 | 20 | 6 | 1 | 6 | 11 | 1  | 11 | 34 | 0 | 6 | 1 | 6  | 6  | 6  | 44 | 6 | 6 | 6 | 9  | 10 | 9  |
|            | 26 | 2 | 2 | 2 | 0  | 0  | 0  | 25 | 3 | 6 | 6 | 11 | 11 | 11 | 37 | 6 | 6 | 6 | 10 | 11 | 11 | 48 | 6 | 6 | 6 | 9  | 9  | 8* |
|            | 33 | 6 | 6 | 6 | 6  | 6  | 6  | 35 | 6 | 6 | 6 | 11 | 11 | 10 | 45 | 6 | 6 | 6 | 10 | 11 | 10 | 49 | 6 | 6 | 6 | 9  | 9  | 8* |
| 08/11/2022 | 1  | 6 | 6 | 6 | 11 | 11 | 11 | 13 | 1 | 6 | 6 | 11 | 11 | 11 | 22 | 6 | 6 | 6 | 11 | 10 | 11 | 10 | 6 | 6 | 6 | 11 | 11 | 10 |
|            | 2  | 6 | 6 | 6 | 6  | 6  | 1  | 14 | 1 | 1 | 6 | 11 | 11 | 11 | 23 | 1 | 1 | 1 | 1  | 1  | 1  | 16 | 6 | 6 | 6 | 1  | 6  | 6  |
|            | 4  | 6 | 6 | 1 | 11 | 11 | 11 | 15 | 6 | 6 | 6 | 11 | 11 | 11 | 27 | 6 | 6 | 6 | 10 | 11 | 11 | 21 | 6 | 6 | 6 | 6  | 6  | 6  |
|            | 5  | 6 | 6 | 1 | 11 | 11 | 11 | 17 | 6 | 6 | 6 | 11 | 11 | 11 | 28 | 6 | 6 | 6 | 11 | 11 | 11 | 38 | 6 | 6 | 6 | 9  | 11 | 6  |
|            | 7  | 6 | 6 | 6 | 11 | 11 | 11 | 18 | 6 | 6 | 0 | 0  | 0  | 0  | 29 | 6 | 6 | 6 | 9  | 11 | 0  | 40 | 6 | 6 | 6 | 9  | 9  | 9  |
|            | 8  | 6 | 6 | 6 | 11 | 11 | 11 | 3  | 6 | 1 | 1 | 10 | 1  | 9  | 30 | 6 | 6 | 6 | 11 | 10 | 10 | 41 | 6 | 6 | 6 | 9  | 0  | 6  |
|            | 6  | 6 | 6 | 6 | 11 | 11 | 11 | 19 | 6 | 6 | 6 | 11 | 11 | 11 | 31 | 6 | 6 | 6 | 9  | 9  | 0  | 46 | 6 | 6 | 6 | 6  | 6  | 6  |
|            | 12 | 6 | 6 | 6 | 11 | 11 | 11 | 20 | 6 | 1 | 6 | 11 | 1  | 11 | 34 | 0 | 6 | 1 | 6  | 6  | 6  | 44 | 6 | 6 | 6 | 9  | 10 | 9  |
|            | 26 | 2 | 2 | 2 | 0  | 0  | 0  | 25 | 3 | 6 | 6 | 11 | 11 | 11 | 37 | 6 | 6 | 6 | 10 | 11 | 11 | 48 | 6 | 6 | 6 | 9  | 9  | 8* |
|            | 33 | 6 | 6 | 6 | 6  | 6  | 6  | 35 | 6 | 6 | 6 | 11 | 11 | 10 | 45 | 6 | 6 | 6 | 10 | 11 | 10 | 49 | 6 | 6 | 6 | 9  | 9  | 8* |
| 08/14/2022 | 1  | 6 | 6 | 6 | 11 | 11 | 11 | 13 | 1 | 6 | 6 | 11 | 11 | 11 | 22 | 6 | 6 | 6 | 11 | 10 | 11 | 10 | 6 | 6 | 6 | 11 | 11 | 11 |
|            | 2  | 6 | 6 | 6 | 6  | 6  | 1  | 14 | 1 | 1 | 6 | 11 | 11 | 11 | 23 | 1 | 1 | 1 | 1  | 1  | 1  | 16 | 6 | 6 | 6 | 1  | 6  | 6  |
|            | 4  | 6 | 6 | 1 | 11 | 11 | 11 | 15 | 6 | 6 | 6 | 11 | 11 | 11 | 27 | 6 | 6 | 6 | 11 | 11 | 11 | 21 | 6 | 6 | 6 | 6  | 6  | 6  |
|            | 5  | 6 | 6 | 1 | 11 | 11 | 11 | 17 | 6 | 6 | 6 | 11 | 11 | 11 | 28 | 6 | 6 | 6 | 11 | 11 | 11 | 38 | 6 | 6 | 6 | 9  | 11 | 6  |
|            | 7  | 6 | 6 | 6 | 11 | 11 | 11 | 18 | 6 | 6 | 0 | 0  | 0  | 0  | 29 | 6 | 6 | 6 | 10 | 11 | 0  | 40 | 6 | 6 | 6 | 9  | 9  | 9  |
|            | 8  | 6 | 6 | 6 | 11 | 11 | 11 | 3  | 6 | 1 | 1 | 11 | 1  | 10 | 30 | 6 | 6 | 6 | 11 | 10 | 10 | 41 | 6 | 6 | 6 | 9  | 0  | 6  |
|            | 6  | 6 | 6 | 6 | 11 | 11 | 11 | 19 | 6 | 6 | 6 | 11 | 11 | 11 | 31 | 6 | 6 | 6 | 9  | 9  | 0  | 46 | 6 | 6 | 6 | 6  | 6  | 6  |
|            | 12 | 6 | 6 | 6 | 11 | 11 | 11 | 20 | 6 | 1 | 6 | 11 | 1  | 11 | 34 | 0 | 6 | 1 | 6  | 6  | 6  | 44 | 6 | 6 | 6 | 10 | 11 | 10 |
|            | 26 | 2 | 2 | 2 | 0  | 0  | 0  | 25 | 3 | 6 | 6 | 11 | 11 | 11 | 37 | 6 | 6 | 6 | 11 | 11 | 11 | 48 | 6 | 6 | 6 | 9  | 9  | 8* |
|            | 33 | 6 | 6 | 6 | 6  | 6  | 6  | 35 | 6 | 6 | 6 | 11 | 11 | 11 | 45 | 6 | 6 | 6 | 11 | 11 | 11 | 49 | 6 | 6 | 6 | 9  | 9  | 8* |
| 08/17/2022 | 1  | 6 | 6 | 6 | 11 | 11 | 11 | 13 | 1 | 6 | 6 | 11 | 11 | 11 | 22 | 6 | 6 | 6 | 11 | 10 | 11 | 10 | 6 | 6 | 6 | 11 | 11 | 11 |
|            | 2  | 6 | 6 | 6 | 6  | 6  | 1  | 14 | 1 | 1 | 6 | 11 | 11 | 11 | 23 | 1 | 1 | 1 | 1  | 1  | 1  | 16 | 6 | 6 | 6 | 1  | 6  | 6  |
|            | 4  | 6 | 6 | 1 | 11 | 11 | 11 | 15 | 6 | 6 | 6 | 11 | 11 | 11 | 27 | 6 | 6 | 6 | 11 | 11 | 11 | 21 | 6 | 6 | 6 | 6  | 6  | 6  |
|            | 5  | 6 | 6 | 1 | 11 | 11 | 11 | 17 | 6 | 6 | 6 | 11 | 11 | 11 | 28 | 6 | 6 | 6 | 11 | 11 | 11 | 38 | 6 | 6 | 6 | 9  | 11 | 6  |
|            | 7  | 6 | 6 | 6 | 11 | 11 | 11 | 18 | 6 | 6 | 0 | 0  | 0  | 0  | 29 | 6 | 6 | 6 | 10 | 11 | 0  | 40 | 6 | 6 | 6 | 9  | 9  | 9  |
|            | 8  | 6 | 6 | 6 | 11 | 11 | 11 | 3  | 6 | 1 | 1 | 11 | 1  | 10 | 30 | 6 | 6 | 6 | 11 | 10 | 10 | 41 | 6 | 6 | 6 | 9  | 0  | 6  |
|            | 6  | 6 | 6 | 6 | 11 | 11 | 11 | 19 | 6 | 6 | 6 | 11 | 11 | 11 | 31 | 6 | 6 | 6 | 9  | 9  | 0  | 46 | 6 | 6 | 6 | 6  | 6  | 6  |
|            | 12 | 6 | 6 | 6 | 11 | 11 | 11 | 20 | 6 | 1 | 6 | 1  |    |    |    |   |   |   |    |    |    |    |   |   |   |    |    |    |





|            |    |   |   |   |    |    |    |    |   |   |   |    |    |    |    |   |   |   |    |    |    |    |   |   |   |    |    |    |
|------------|----|---|---|---|----|----|----|----|---|---|---|----|----|----|----|---|---|---|----|----|----|----|---|---|---|----|----|----|
| 09/10/2022 | 1  | 6 | 6 | 6 | 11 | 11 | 11 | 13 | 1 | 6 | 6 | 11 | 11 | 11 | 22 | 6 | 6 | 6 | 11 | 11 | 11 | 10 | 6 | 6 | 6 | 11 | 11 | 11 |
|            | 2  | 6 | 6 | 6 | 6  | 6  | 1  | 14 | 1 | 1 | 6 | 11 | 11 | 11 | 23 | 1 | 1 | 1 | 1  | 1  | 1  | 16 | 6 | 6 | 6 | 1  | 6  | 6  |
|            | 4  | 6 | 6 | 1 | 11 | 11 | 11 | 15 | 6 | 6 | 6 | 11 | 11 | 11 | 27 | 6 | 6 | 6 | 11 | 11 | 11 | 21 | 6 | 6 | 6 | 6  | 6  | 6  |
|            | 5  | 6 | 6 | 1 | 11 | 11 | 11 | 17 | 6 | 6 | 6 | 11 | 11 | 11 | 28 | 6 | 6 | 6 | 11 | 11 | 11 | 38 | 6 | 6 | 6 | 9  | 11 | 6  |
|            | 7  | 6 | 6 | 6 | 11 | 11 | 11 | 18 | 6 | 6 | 0 | 0  | 0  | 0  | 29 | 6 | 6 | 6 | 10 | 11 | 0  | 40 | 6 | 6 | 6 | 9  | 9  | 9  |
|            | 8  | 6 | 6 | 6 | 11 | 11 | 11 | 3  | 6 | 1 | 1 | 11 | 1  | 10 | 30 | 6 | 6 | 6 | 11 | 10 | 10 | 41 | 6 | 6 | 6 | 9  | 0  | 6  |
|            | 6  | 6 | 6 | 6 | 11 | 11 | 11 | 19 | 6 | 6 | 6 | 11 | 11 | 11 | 31 | 6 | 6 | 6 | 9  | 9  | 0  | 46 | 6 | 6 | 6 | 6  | 6  | 6  |
|            | 12 | 6 | 6 | 6 | 11 | 11 | 11 | 20 | 6 | 1 | 6 | 11 | 1  | 11 | 34 | 0 | 6 | 1 | 6  | 6  | 6  | 44 | 6 | 6 | 6 | 11 | 11 | 11 |
|            | 26 | 2 | 2 | 2 | 0  | 0  | 0  | 25 | 3 | 6 | 6 | 11 | 11 | 11 | 37 | 6 | 6 | 6 | 11 | 11 | 11 | 48 | 6 | 6 | 6 | 9  | 9  | 8* |
|            | 33 | 6 | 6 | 6 | 6  | 6  | 6  | 35 | 6 | 6 | 6 | 11 | 11 | 11 | 45 | 6 | 6 | 6 | 11 | 11 | 11 | 49 | 6 | 6 | 6 | 9  | 9  | 8* |
| 09/13/2022 | 1  | 6 | 6 | 6 | 11 | 11 | 11 | 13 | 1 | 6 | 6 | 11 | 11 | 11 | 22 | 6 | 6 | 6 | 11 | 11 | 11 | 10 | 6 | 6 | 6 | 11 | 11 | 11 |
|            | 2  | 6 | 6 | 6 | 6  | 6  | 1  | 14 | 1 | 1 | 6 | 11 | 11 | 11 | 23 | 1 | 1 | 1 | 1  | 1  | 1  | 16 | 6 | 6 | 6 | 1  | 6  | 6  |
|            | 4  | 6 | 6 | 1 | 11 | 11 | 11 | 15 | 6 | 6 | 6 | 11 | 11 | 11 | 27 | 6 | 6 | 6 | 11 | 11 | 11 | 21 | 6 | 6 | 6 | 6  | 6  | 6  |
|            | 5  | 6 | 6 | 1 | 11 | 11 | 11 | 17 | 6 | 6 | 6 | 11 | 11 | 11 | 28 | 6 | 6 | 6 | 11 | 11 | 11 | 38 | 6 | 6 | 6 | 9  | 11 | 6  |
|            | 7  | 6 | 6 | 6 | 11 | 11 | 11 | 18 | 6 | 6 | 0 | 0  | 0  | 0  | 29 | 6 | 6 | 6 | 10 | 11 | 0  | 40 | 6 | 6 | 6 | 9  | 9  | 9  |
|            | 8  | 6 | 6 | 6 | 11 | 11 | 11 | 3  | 6 | 1 | 1 | 11 | 1  | 10 | 30 | 6 | 6 | 6 | 11 | 10 | 10 | 41 | 6 | 6 | 6 | 9  | 0  | 6  |
|            | 6  | 6 | 6 | 6 | 11 | 11 | 11 | 19 | 6 | 6 | 6 | 11 | 11 | 11 | 31 | 6 | 6 | 6 | 9  | 9  | 0  | 46 | 6 | 6 | 6 | 6  | 6  | 6  |
|            | 12 | 6 | 6 | 6 | 11 | 11 | 11 | 20 | 6 | 1 | 6 | 11 | 1  | 11 | 34 | 0 | 6 | 1 | 6  | 6  | 6  | 44 | 6 | 6 | 6 | 11 | 11 | 11 |
|            | 26 | 2 | 2 | 2 | 0  | 0  | 0  | 25 | 3 | 6 | 6 | 11 | 11 | 11 | 37 | 6 | 6 | 6 | 11 | 11 | 11 | 48 | 6 | 6 | 6 | 9  | 9  | 8* |
|            | 33 | 6 | 6 | 6 | 6  | 6  | 6  | 35 | 6 | 6 | 6 | 11 | 11 | 11 | 45 | 6 | 6 | 6 | 11 | 11 | 11 | 49 | 6 | 6 | 6 | 9  | 9  | 8* |

**Table S3:** Hourly air temperature under 0% shade from May 10 to June 22, 2023.

|                     | Port 1                      | Port 2                      | Port 3                      | Average                     |
|---------------------|-----------------------------|-----------------------------|-----------------------------|-----------------------------|
|                     | 5TE<br>Moisture/<br>Temp/EC | 5TE<br>Moisture/<br>Temp/EC | 5TE<br>Moisture/<br>Temp/EC | 5TE<br>Moisture/<br>Temp/EC |
| Measurement Time    | °C Temp                     | °C Temp                     | °C Temp                     | °C Temp                     |
| 2022-05-11 1:32 PM  | 27.2                        | 19.0                        | #N/A                        | #N/A                        |
| 2022-05-11 1:33 PM  | 26.9                        | 19.0                        | 22.6                        | 22.8                        |
| 2022-05-11 2:00 PM  | 26.4                        | 19.2                        | 23.4                        | 23.0                        |
| 2022-05-11 3:00 PM  | 25.8                        | 20.1                        | 25.6                        | 23.8                        |
| 2022-05-11 4:00 PM  | 24.4                        | 22.3                        | 29.0                        | 25.2                        |
| 2022-05-11 5:00 PM  | 22.0                        | 21.0                        | 25.6                        | 22.9                        |
| 2022-05-11 6:00 PM  | 18.5                        | 17.6                        | 19.2                        | 18.4                        |
| 2022-05-11 7:00 PM  | 17.2                        | 16.6                        | 17.6                        | 17.1                        |
| 2022-05-11 8:00 PM  | 16.5                        | 16.0                        | 17.0                        | 16.5                        |
| 2022-05-11 9:00 PM  | 15.4                        | 15.2                        | 16.1                        | 15.6                        |
| 2022-05-11 10:00 PM | 13.6                        | 14.1                        | 14.0                        | 13.9                        |
| 2022-05-11 11:00 PM | 12.5                        | 13.3                        | 13.1                        | 13.0                        |
| 2022-05-12 12:00 AM | 12.0                        | 12.8                        | 12.6                        | 12.5                        |
| 2022-05-12 1:00 AM  | 11.4                        | 12.3                        | 12.0                        | 11.9                        |
| 2022-05-12 2:00 AM  | 12.3                        | 12.6                        | 12.9                        | 12.6                        |
| 2022-05-12 3:00 AM  | 13.1                        | 12.9                        | 13.5                        | 13.2                        |
| 2022-05-12 4:00 AM  | 9.8                         | 11.0                        | 10.2                        | 10.3                        |
| 2022-05-12 5:00 AM  | 10.2                        | 11.1                        | 10.5                        | 10.6                        |
| 2022-05-12 6:00 AM  | 10.8                        | 11.4                        | 11.1                        | 11.1                        |
| 2022-05-12 7:00 AM  | 10.6                        | 11.3                        | 10.9                        | 10.9                        |
| 2022-05-12 8:00 AM  | 10.0                        | 10.9                        | 10.6                        | 10.5                        |
| 2022-05-12 9:00 AM  | 10.7                        | 11.3                        | 11.0                        | 11.0                        |
| 2022-05-12 10:00 AM | 11.0                        | 11.4                        | 11.1                        | 11.2                        |
| 2022-05-12 11:00 AM | 11.6                        | 11.8                        | 11.7                        | 11.7                        |
| 2022-05-12 12:00 PM | 14.1                        | 13.4                        | 14.0                        | 13.8                        |
| 2022-05-12 1:00 PM  | 17.9                        | 15.1                        | 16.4                        | 16.5                        |
| 2022-05-12 2:00 PM  | 21.1                        | 17.2                        | 19.4                        | 19.2                        |
| 2022-05-12 3:00 PM  | 22.0                        | 17.6                        | 20.2                        | 19.9                        |
| 2022-05-12 4:00 PM  | 17.9                        | 16.2                        | 17.7                        | 17.3                        |
| 2022-05-12 5:00 PM  | 16.4                        | 15.4                        | 16.4                        | 16.1                        |
| 2022-05-12 6:00 PM  | 16.5                        | 15.6                        | 17.1                        | 16.4                        |
| 2022-05-12 7:00 PM  | 15.6                        | 15.3                        | 16.5                        | 15.8                        |
| 2022-05-12 8:00 PM  | 14.7                        | 14.6                        | 15.1                        | 14.8                        |
| 2022-05-12 9:00 PM  | 12.3                        | 13.1                        | 12.6                        | 12.7                        |
| 2022-05-12 10:00 PM | 11.6                        | 12.5                        | 11.8                        | 12.0                        |
| 2022-05-12 11:00 PM | 11.7                        | 12.4                        | 12.0                        | 12.0                        |
| 2022-05-13 12:00 AM | 11.5                        | 12.3                        | 11.9                        | 11.9                        |

|                     |      |      |      |      |
|---------------------|------|------|------|------|
| 2022-05-13 1:00 AM  | 11.0 | 11.9 | 11.3 | 11.4 |
| 2022-05-13 2:00 AM  | 10.5 | 11.4 | 10.8 | 10.9 |
| 2022-05-13 3:00 AM  | 11.3 | 11.9 | 11.6 | 11.6 |
| 2022-05-13 4:00 AM  | 10.4 | 11.3 | 10.6 | 10.8 |
| 2022-05-13 5:00 AM  | 10.3 | 11.2 | 10.7 | 10.7 |
| 2022-05-13 6:00 AM  | 10.3 | 11.2 | 10.7 | 10.7 |
| 2022-05-13 7:00 AM  | 9.6  | 10.5 | 9.9  | 10.0 |
| 2022-05-13 8:00 AM  | 9.8  | 10.8 | 10.3 | 10.3 |
| 2022-05-13 9:00 AM  | 10.3 | 11.0 | 10.7 | 10.7 |
| 2022-05-13 10:00 AM | 11.2 | 11.8 | 11.8 | 11.6 |
| 2022-05-13 11:00 AM | 13.8 | 13.4 | 13.4 | 13.5 |
| 2022-05-13 12:00 PM | 20.9 | 16.2 | 14.5 | 17.2 |
| 2022-05-13 1:00 PM  | 22.4 | 16.2 | 16.3 | 18.3 |
| 2022-05-13 2:00 PM  | 23.0 | 16.8 | 18.5 | 19.4 |
| 2022-05-13 3:00 PM  | 24.2 | 18.0 | 22.7 | 21.6 |
| 2022-05-13 4:00 PM  | 23.8 | 22.1 | 30.3 | 25.4 |
| 2022-05-13 5:00 PM  | 23.3 | 25.2 | 36.8 | 28.4 |
| 2022-05-13 6:00 PM  | 20.2 | 22.8 | 38.1 | 27.0 |
| 2022-05-13 7:00 PM  | 16.4 | 18.2 | 25.1 | 19.9 |
| 2022-05-13 8:00 PM  | 14.6 | 15.8 | 16.7 | 15.7 |
| 2022-05-13 9:00 PM  | 13.8 | 15.0 | 15.1 | 14.6 |
| 2022-05-13 10:00 PM | 11.7 | 13.4 | 12.4 | 12.5 |
| 2022-05-13 11:00 PM | 10.2 | 12.2 | 10.8 | 11.1 |
| 2022-05-14 12:00 AM | 9.7  | 11.7 | 9.9  | 10.4 |
| 2022-05-14 1:00 AM  | 10.2 | 11.8 | 10.2 | 10.7 |
| 2022-05-14 2:00 AM  | 9.9  | 11.5 | 10.4 | 10.6 |
| 2022-05-14 3:00 AM  | 9.8  | 11.3 | 10.0 | 10.4 |
| 2022-05-14 4:00 AM  | 9.6  | 11.2 | 10.0 | 10.3 |
| 2022-05-14 5:00 AM  | 9.2  | 10.8 | 9.2  | 9.7  |
| 2022-05-14 6:00 AM  | 8.5  | 10.3 | 8.9  | 9.2  |
| 2022-05-14 7:00 AM  | 7.8  | 9.6  | 7.9  | 8.4  |
| 2022-05-14 8:00 AM  | 8.8  | 10.4 | 9.0  | 9.4  |
| 2022-05-14 9:00 AM  | 9.8  | 11.1 | 10.9 | 10.6 |
| 2022-05-14 10:00 AM | 11.7 | 12.6 | 12.3 | 12.2 |
| 2022-05-14 11:00 AM | 16.2 | 14.8 | 14.1 | 15.0 |
| 2022-05-14 12:00 PM | 24.0 | 17.7 | 14.5 | 18.7 |
| 2022-05-14 1:00 PM  | 25.6 | 16.8 | 16.2 | 19.5 |
| 2022-05-14 2:00 PM  | 26.4 | 17.6 | 19.0 | 21.0 |
| 2022-05-14 3:00 PM  | 26.3 | 18.6 | 23.0 | 22.6 |
| 2022-05-14 4:00 PM  | 26.6 | 24.5 | 35.0 | 28.7 |
| 2022-05-14 5:00 PM  | 24.8 | 26.7 | 37.5 | 29.7 |
| 2022-05-14 6:00 PM  | 21.4 | 21.7 | 31.2 | 24.8 |
| 2022-05-14 7:00 PM  | 21.3 | 20.9 | 31.1 | 24.4 |

|                     |      |      |      |      |
|---------------------|------|------|------|------|
| 2022-05-14 8:00 PM  | 19.7 | 19.1 | 20.1 | 19.6 |
| 2022-05-14 9:00 PM  | 17.9 | 17.8 | 18.1 | 17.9 |
| 2022-05-14 10:00 PM | 15.4 | 16.3 | 16.3 | 16.0 |
| 2022-05-14 11:00 PM | 14.6 | 15.4 | 15.7 | 15.2 |
| 2022-05-15 12:00 AM | 13.3 | 14.3 | 14.4 | 14.0 |
| 2022-05-15 1:00 AM  | 11.9 | 13.5 | 13.1 | 12.8 |
| 2022-05-15 2:00 AM  | 10.9 | 12.8 | 12.2 | 12.0 |
| 2022-05-15 3:00 AM  | 10.2 | 12.2 | 11.4 | 11.3 |
| 2022-05-15 4:00 AM  | 9.2  | 11.4 | 10.1 | 10.2 |
| 2022-05-15 5:00 AM  | 9.1  | 11.1 | 9.4  | 9.9  |
| 2022-05-15 6:00 AM  | 9.0  | 10.8 | 8.6  | 9.5  |
| 2022-05-15 7:00 AM  | 8.1  | 9.9  | 7.9  | 8.6  |
| 2022-05-15 8:00 AM  | 8.3  | 10.0 | 8.5  | 8.9  |
| 2022-05-15 9:00 AM  | 10.3 | 11.2 | 11.0 | 10.8 |
| 2022-05-15 10:00 AM | 12.7 | 12.8 | 12.8 | 12.8 |
| 2022-05-15 11:00 AM | 14.6 | 14.0 | 13.9 | 14.2 |
| 2022-05-15 12:00 PM | 17.1 | 15.0 | 15.2 | 15.8 |
| 2022-05-15 1:00 PM  | 19.8 | 16.0 | 16.7 | 17.5 |
| 2022-05-15 2:00 PM  | 22.2 | 17.2 | 19.0 | 19.5 |
| 2022-05-15 3:00 PM  | 20.1 | 16.9 | 19.1 | 18.7 |
| 2022-05-15 4:00 PM  | 19.2 | 18.0 | 23.3 | 20.2 |
| 2022-05-15 5:00 PM  | 19.4 | 18.9 | 24.5 | 20.9 |
| 2022-05-15 6:00 PM  | 18.1 | 17.2 | 19.5 | 18.3 |
| 2022-05-15 7:00 PM  | 17.0 | 16.4 | 17.2 | 16.9 |
| 2022-05-15 8:00 PM  | 15.9 | 15.6 | 16.5 | 16.0 |
| 2022-05-15 9:00 PM  | 14.7 | 14.8 | 15.7 | 15.1 |
| 2022-05-15 10:00 PM | 14.1 | 14.3 | 14.6 | 14.3 |
| 2022-05-15 11:00 PM | 12.7 | 13.5 | 13.3 | 13.2 |
| 2022-05-16 12:00 AM | 11.5 | 12.8 | 12.5 | 12.3 |
| 2022-05-16 1:00 AM  | 11.4 | 12.2 | 12.3 | 12.0 |
| 2022-05-16 2:00 AM  | 10.7 | 11.4 | 10.9 | 11.0 |
| 2022-05-16 3:00 AM  | 9.6  | 10.4 | 9.5  | 9.8  |
| 2022-05-16 4:00 AM  | 8.9  | 9.9  | 8.8  | 9.2  |
| 2022-05-16 5:00 AM  | 8.6  | 9.7  | 8.7  | 9.0  |
| 2022-05-16 6:00 AM  | 8.2  | 9.5  | 8.8  | 8.8  |
| 2022-05-16 7:00 AM  | 8.5  | 9.6  | 8.6  | 8.9  |
| 2022-05-16 8:00 AM  | 8.9  | 9.8  | 8.6  | 9.1  |
| 2022-05-16 9:00 AM  | 9.7  | 10.1 | 9.2  | 9.7  |
| 2022-05-16 10:00 AM | 10.5 | 10.5 | 9.7  | 10.2 |
| 2022-05-16 11:00 AM | 11.1 | 9.9  | 8.9  | 10.0 |
| 2022-05-16 12:00 PM | 15.4 | 11.6 | 11.3 | 12.8 |
| 2022-05-16 1:00 PM  | 16.7 | 12.3 | 13.4 | 14.1 |
| 2022-05-16 2:00 PM  | 20.5 | 13.1 | 15.4 | 16.3 |

|                     |      |      |      |      |
|---------------------|------|------|------|------|
| 2022-05-16 3:00 PM  | 18.4 | 13.8 | 17.1 | 16.4 |
| 2022-05-16 4:00 PM  | 20.3 | 16.8 | 24.4 | 20.5 |
| 2022-05-16 5:00 PM  | 17.6 | 15.7 | 20.4 | 17.9 |
| 2022-05-16 6:00 PM  | 15.5 | 13.9 | 16.3 | 15.2 |
| 2022-05-16 7:00 PM  | 13.7 | 12.7 | 14.7 | 13.7 |
| 2022-05-16 8:00 PM  | 12.4 | 11.8 | 12.8 | 12.3 |
| 2022-05-16 9:00 PM  | 11.3 | 11.1 | 11.4 | 11.3 |
| 2022-05-16 10:00 PM | 9.6  | 10.1 | 9.7  | 9.8  |
| 2022-05-16 11:00 PM | 9.6  | 10.1 | 9.5  | 9.7  |
| 2022-05-17 12:00 AM | 8.4  | 9.4  | 8.5  | 8.8  |
| 2022-05-17 1:00 AM  | 7.4  | 9.0  | 7.4  | 7.9  |
| 2022-05-17 2:00 AM  | 7.3  | 8.7  | 7.0  | 7.7  |
| 2022-05-17 3:00 AM  | 6.1  | 8.0  | 5.6  | 6.6  |
| 2022-05-17 4:00 AM  | 5.8  | 7.8  | 5.7  | 6.4  |
| 2022-05-17 5:00 AM  | 5.3  | 7.3  | 4.8  | 5.8  |
| 2022-05-17 6:00 AM  | 4.5  | 6.6  | 3.2  | 4.8  |
| 2022-05-17 7:00 AM  | 3.8  | 6.0  | 2.3  | 4.0  |
| 2022-05-17 8:00 AM  | 4.3  | 6.0  | 3.4  | 4.6  |
| 2022-05-17 9:00 AM  | 5.8  | 7.1  | 5.8  | 6.2  |
| 2022-05-17 10:00 AM | 7.1  | 7.9  | 6.9  | 7.3  |
| 2022-05-17 11:00 AM | 10.4 | 9.6  | 8.3  | 9.4  |
| 2022-05-17 12:00 PM | 17.1 | 12.8 | 10.5 | 13.5 |
| 2022-05-17 1:00 PM  | 17.5 | 12.3 | 12.9 | 14.2 |
| 2022-05-17 2:00 PM  | 18.7 | 12.8 | 15.4 | 15.6 |
| 2022-05-17 3:00 PM  | 20.3 | 14.4 | 20.4 | 18.4 |
| 2022-05-17 4:00 PM  | 20.6 | 19.6 | 30.7 | 23.6 |
| 2022-05-17 5:00 PM  | 18.9 | 21.4 | 34.1 | 24.8 |
| 2022-05-17 6:00 PM  | 15.3 | 17.5 | 30.2 | 21.0 |
| 2022-05-17 7:00 PM  | 12.8 | 14.0 | 19.1 | 15.3 |
| 2022-05-17 8:00 PM  | 11.9 | 12.7 | 13.9 | 12.8 |
| 2022-05-17 9:00 PM  | 10.7 | 11.8 | 11.6 | 11.4 |
| 2022-05-17 10:00 PM | 8.7  | 10.6 | 8.9  | 9.4  |
| 2022-05-17 11:00 PM | 7.6  | 9.6  | 7.3  | 8.2  |
| 2022-05-18 12:00 AM | 6.8  | 8.9  | 6.2  | 7.3  |
| 2022-05-18 1:00 AM  | 6.3  | 8.4  | 5.3  | 6.7  |
| 2022-05-18 2:00 AM  | 6.4  | 8.4  | 5.1  | 6.6  |
| 2022-05-18 3:00 AM  | 7.0  | 8.6  | 5.7  | 7.1  |
| 2022-05-18 4:00 AM  | 7.3  | 8.9  | 7.0  | 7.7  |
| 2022-05-18 5:00 AM  | 7.3  | 8.8  | 6.5  | 7.5  |
| 2022-05-18 6:00 AM  | 7.3  | 8.6  | 6.3  | 7.4  |
| 2022-05-18 7:00 AM  | 7.5  | 8.7  | 6.8  | 7.7  |
| 2022-05-18 8:00 AM  | 7.9  | 8.9  | 7.8  | 8.2  |
| 2022-05-18 9:00 AM  | 7.9  | 9.2  | 8.1  | 8.4  |

|                     |      |      |      |      |
|---------------------|------|------|------|------|
| 2022-05-18 10:00 AM | 9.3  | 10.3 | 9.4  | 9.7  |
| 2022-05-18 11:00 AM | 9.8  | 10.8 | 10.2 | 10.3 |
| 2022-05-18 12:00 PM | 10.2 | 10.9 | 10.4 | 10.5 |
| 2022-05-18 1:00 PM  | 9.6  | 10.2 | 9.8  | 9.9  |
| 2022-05-18 2:00 PM  | 11.4 | 11.4 | 11.8 | 11.5 |
| 2022-05-18 3:00 PM  | 10.2 | 11.0 | 10.9 | 10.7 |
| 2022-05-18 4:00 PM  | 9.0  | 10.2 | 9.0  | 9.4  |
| 2022-05-18 5:00 PM  | 8.7  | 9.9  | 8.7  | 9.1  |
| 2022-05-18 6:00 PM  | 7.5  | 9.1  | 7.3  | 8.0  |
| 2022-05-18 7:00 PM  | 7.8  | 9.4  | 9.0  | 8.7  |
| 2022-05-18 8:00 PM  | 7.0  | 8.9  | 7.1  | 7.7  |
| 2022-05-18 9:00 PM  | 6.8  | 8.4  | 6.6  | 7.3  |
| 2022-05-18 10:00 PM | 6.8  | 8.3  | 6.6  | 7.2  |
| 2022-05-18 11:00 PM | 6.6  | 8.2  | 6.4  | 7.1  |
| 2022-05-19 12:00 AM | 6.5  | 8.0  | 6.2  | 6.9  |
| 2022-05-19 1:00 AM  | 6.6  | 8.0  | 6.3  | 7.0  |
| 2022-05-19 2:00 AM  | 6.4  | 8.1  | 6.5  | 7.0  |
| 2022-05-19 3:00 AM  | 6.4  | 8.1  | 6.6  | 7.0  |
| 2022-05-19 4:00 AM  | 6.5  | 7.9  | 6.8  | 7.1  |
| 2022-05-19 5:00 AM  | 6.4  | 7.5  | 7.1  | 7.0  |
| 2022-05-19 6:00 AM  | 6.5  | 7.6  | 7.1  | 7.1  |
| 2022-05-19 7:00 AM  | 6.9  | 8.0  | 7.0  | 7.3  |
| 2022-05-19 8:00 AM  | 7.3  | 8.1  | 7.8  | 7.7  |
| 2022-05-19 9:00 AM  | 7.7  | 8.4  | 8.4  | 8.2  |
| 2022-05-19 10:00 AM | 8.8  | 9.2  | 9.5  | 9.2  |
| 2022-05-19 11:00 AM | 11.4 | 10.8 | 11.5 | 11.2 |
| 2022-05-19 12:00 PM | 13.8 | 12.3 | 13.5 | 13.2 |
| 2022-05-19 1:00 PM  | 16.1 | 13.5 | 14.7 | 14.8 |
| 2022-05-19 2:00 PM  | 14.5 | 13.3 | 14.5 | 14.1 |
| 2022-05-19 3:00 PM  | 16.2 | 14.3 | 16.4 | 15.6 |
| 2022-05-19 4:00 PM  | 15.1 | 13.9 | 15.8 | 14.9 |
| 2022-05-19 5:00 PM  | 15.2 | 14.5 | 17.7 | 15.8 |
| 2022-05-19 6:00 PM  | 13.8 | 13.7 | 15.7 | 14.4 |
| 2022-05-19 7:00 PM  | 13.3 | 13.2 | 13.9 | 13.5 |
| 2022-05-19 8:00 PM  | 11.3 | 11.8 | 12.4 | 11.8 |
| 2022-05-19 9:00 PM  | 9.0  | 10.6 | 9.9  | 9.8  |
| 2022-05-19 10:00 PM | 7.6  | 9.7  | 8.4  | 8.6  |
| 2022-05-19 11:00 PM | 7.7  | 9.6  | 8.3  | 8.5  |
| 2022-05-20 12:00 AM | 7.4  | 9.4  | 8.0  | 8.3  |
| 2022-05-20 1:00 AM  | 6.8  | 8.8  | 7.2  | 7.6  |
| 2022-05-20 2:00 AM  | 6.4  | 8.3  | 6.7  | 7.1  |
| 2022-05-20 3:00 AM  | 6.4  | 8.3  | 6.8  | 7.2  |
| 2022-05-20 4:00 AM  | 6.9  | 8.5  | 6.8  | 7.4  |



|                     |      |      |      |      |
|---------------------|------|------|------|------|
| 2022-05-20 5:00 AM  | 7.2  | 8.7  | 7.1  | 7.7  |
| 2022-05-20 6:00 AM  | 7.4  | 8.8  | 7.4  | 7.9  |
| 2022-05-20 7:00 AM  | 6.6  | 8.3  | 7.0  | 7.3  |
| 2022-05-20 8:00 AM  | 6.2  | 7.9  | 6.8  | 7.0  |
| 2022-05-20 9:00 AM  | 7.1  | 8.5  | 7.5  | 7.7  |
| 2022-05-20 10:00 AM | 7.9  | 8.7  | 8.3  | 8.3  |
| 2022-05-20 11:00 AM | 8.1  | 8.6  | 8.7  | 8.5  |
| 2022-05-20 12:00 PM | 10.2 | 9.9  | 10.0 | 10.0 |
| 2022-05-20 1:00 PM  | 18.8 | 13.6 | 13.7 | 15.4 |
| 2022-05-20 2:00 PM  | 19.4 | 14.4 | 15.3 | 16.4 |
| 2022-05-20 3:00 PM  | 20.4 | 14.9 | 18.7 | 18.0 |
| 2022-05-20 4:00 PM  | 21.8 | 17.3 | 24.8 | 21.3 |
| 2022-05-20 5:00 PM  | 19.1 | 16.7 | 22.0 | 19.3 |
| 2022-05-20 6:00 PM  | 18.2 | 16.2 | 23.0 | 19.1 |
| 2022-05-20 7:00 PM  | 16.7 | 15.4 | 20.0 | 17.4 |
| 2022-05-20 8:00 PM  | 15.7 | 14.8 | 16.4 | 15.6 |
| 2022-05-20 9:00 PM  | 13.8 | 13.1 | 14.6 | 13.8 |
| 2022-05-20 10:00 PM | 11.6 | 11.8 | 11.7 | 11.7 |
| 2022-05-20 11:00 PM | 9.1  | 10.4 | 9.1  | 9.5  |
| 2022-05-21 12:00 AM | 7.6  | 9.0  | 7.2  | 7.9  |
| 2022-05-21 1:00 AM  | 6.8  | 7.9  | 6.0  | 6.9  |
| 2022-05-21 2:00 AM  | 6.2  | 7.1  | 5.5  | 6.3  |
| 2022-05-21 3:00 AM  | 5.6  | 6.5  | 5.0  | 5.7  |
| 2022-05-21 4:00 AM  | 5.0  | 5.9  | 4.4  | 5.1  |
| 2022-05-21 5:00 AM  | 4.2  | 5.7  | 3.9  | 4.6  |
| 2022-05-21 6:00 AM  | 3.6  | 5.7  | 3.7  | 4.3  |
| 2022-05-21 7:00 AM  | 3.1  | 5.3  | 3.9  | 4.1  |
| 2022-05-21 8:00 AM  | 3.7  | 5.9  | 4.9  | 4.8  |
| 2022-05-21 9:00 AM  | 6.1  | 6.9  | 6.0  | 6.3  |
| 2022-05-21 10:00 AM | 8.0  | 7.7  | 6.9  | 7.5  |
| 2022-05-21 11:00 AM | 9.3  | 8.3  | 8.2  | 8.6  |
| 2022-05-21 12:00 PM | 11.3 | 9.0  | 9.0  | 9.8  |
| 2022-05-21 1:00 PM  | 15.8 | 10.6 | 11.2 | 12.5 |
| 2022-05-21 2:00 PM  | 12.3 | 10.2 | 10.9 | 11.1 |
| 2022-05-21 3:00 PM  | 11.4 | 10.3 | 10.9 | 10.9 |
| 2022-05-21 4:00 PM  | 12.3 | 10.6 | 11.8 | 11.6 |
| 2022-05-21 5:00 PM  | 13.9 | 11.6 | 15.0 | 13.5 |
| 2022-05-21 6:00 PM  | 13.1 | 10.9 | 13.2 | 12.4 |
| 2022-05-21 7:00 PM  | 10.7 | 10.5 | 10.5 | 10.6 |
| 2022-05-21 8:00 PM  | 9.1  | 9.9  | 9.4  | 9.5  |
| 2022-05-21 9:00 PM  | 8.7  | 9.6  | 8.9  | 9.1  |
| 2022-05-21 10:00 PM | 8.2  | 9.0  | 8.0  | 8.4  |
| 2022-05-21 11:00 PM | 7.5  | 8.8  | 7.6  | 8.0  |

|                     |      |      |      |      |
|---------------------|------|------|------|------|
| 2022-05-22 12:00 AM | 7.4  | 8.6  | 7.1  | 7.7  |
| 2022-05-22 1:00 AM  | 7.0  | 8.4  | 7.1  | 7.5  |
| 2022-05-22 2:00 AM  | 6.4  | 8.1  | 6.3  | 6.9  |
| 2022-05-22 3:00 AM  | 5.8  | 7.4  | 5.7  | 6.3  |
| 2022-05-22 4:00 AM  | 5.4  | 6.9  | 4.7  | 5.7  |
| 2022-05-22 5:00 AM  | 5.2  | 6.9  | 5.1  | 5.7  |
| 2022-05-22 6:00 AM  | 5.5  | 6.8  | 4.7  | 5.7  |
| 2022-05-22 7:00 AM  | 5.5  | 6.8  | 5.6  | 6.0  |
| 2022-05-22 8:00 AM  | 5.5  | 7.1  | 6.8  | 6.5  |
| 2022-05-22 9:00 AM  | 6.9  | 7.6  | 7.6  | 7.4  |
| 2022-05-22 10:00 AM | 9.4  | 8.6  | 8.0  | 8.7  |
| 2022-05-22 11:00 AM | 9.9  | 8.8  | 8.4  | 9.0  |
| 2022-05-22 12:00 PM | 15.4 | 10.6 | 9.1  | 11.7 |
| 2022-05-22 1:00 PM  | 20.1 | 10.3 | 11.0 | 13.8 |
| 2022-05-22 2:00 PM  | 23.1 | 12.0 | 12.8 | 16.0 |
| 2022-05-22 3:00 PM  | 26.7 | 13.0 | 15.6 | 18.4 |
| 2022-05-22 4:00 PM  | 15.3 | 11.7 | 12.5 | 13.2 |
| 2022-05-22 5:00 PM  | 17.5 | 12.1 | 13.8 | 14.5 |
| 2022-05-22 6:00 PM  | 19.2 | 12.8 | 18.6 | 16.9 |
| 2022-05-22 7:00 PM  | 13.2 | 11.5 | 13.1 | 12.6 |
| 2022-05-22 8:00 PM  | 9.7  | 10.7 | 11.4 | 10.6 |
| 2022-05-22 9:00 PM  | 8.4  | 10.3 | 10.3 | 9.7  |
| 2022-05-22 10:00 PM | 4.3  | 9.0  | 8.2  | 7.2  |
| 2022-05-22 11:00 PM | 3.3  | 8.2  | 6.4  | 6.0  |
| 2022-05-23 12:00 AM | 2.4  | 7.5  | 5.4  | 5.1  |
| 2022-05-23 1:00 AM  | 1.7  | 6.8  | 4.4  | 4.3  |
| 2022-05-23 2:00 AM  | 0.9  | 5.9  | 3.2  | 3.3  |
| 2022-05-23 3:00 AM  | 0.0  | 5.5  | 2.8  | 2.8  |
| 2022-05-23 4:00 AM  | -0.6 | 5.3  | 2.0  | 2.2  |
| 2022-05-23 5:00 AM  | -0.9 | 4.5  | 1.2  | 1.6  |
| 2022-05-23 6:00 AM  | -0.8 | 4.5  | 1.5  | 1.7  |
| 2022-05-23 7:00 AM  | -0.4 | 4.1  | 1.5  | 1.7  |
| 2022-05-23 8:00 AM  | 1.3  | 4.9  | 3.0  | 3.1  |
| 2022-05-23 9:00 AM  | 4.1  | 6.4  | 5.4  | 5.3  |
| 2022-05-23 10:00 AM | 7.4  | 7.8  | 7.1  | 7.4  |
| 2022-05-23 11:00 AM | 11.3 | 9.9  | 8.6  | 9.9  |
| 2022-05-23 12:00 PM | 32.4 | 13.6 | 11.4 | 19.1 |
| 2022-05-23 1:00 PM  | 27.6 | 13.5 | 14.6 | 18.6 |
| 2022-05-23 2:00 PM  | 30.0 | 13.4 | 16.0 | 19.8 |
| 2022-05-23 3:00 PM  | 38.3 | 15.1 | 22.0 | 25.1 |
| 2022-05-23 4:00 PM  | 31.3 | 17.0 | 27.1 | 25.1 |
| 2022-05-23 5:00 PM  | 30.7 | 18.9 | 34.2 | 27.9 |
| 2022-05-23 6:00 PM  | 21.0 | 15.0 | 24.2 | 20.1 |

|                     |      |      |      |      |
|---------------------|------|------|------|------|
| 2022-05-23 7:00 PM  | 16.7 | 13.8 | 18.0 | 16.2 |
| 2022-05-23 8:00 PM  | 12.7 | 12.6 | 13.8 | 13.0 |
| 2022-05-23 9:00 PM  | 11.1 | 12.0 | 12.1 | 11.7 |
| 2022-05-23 10:00 PM | 8.6  | 11.2 | 10.9 | 10.2 |
| 2022-05-23 11:00 PM | 5.9  | 10.2 | 9.6  | 8.6  |
| 2022-05-24 12:00 AM | 4.4  | 9.2  | 8.2  | 7.3  |
| 2022-05-24 1:00 AM  | 3.5  | 8.5  | 6.9  | 6.3  |
| 2022-05-24 2:00 AM  | 3.1  | 7.8  | 6.0  | 5.6  |
| 2022-05-24 3:00 AM  | 2.5  | 7.1  | 5.0  | 4.9  |
| 2022-05-24 4:00 AM  | 1.7  | 6.5  | 3.9  | 4.0  |
| 2022-05-24 5:00 AM  | 1.3  | 6.0  | 3.3  | 3.5  |
| 2022-05-24 6:00 AM  | 1.1  | 5.7  | 3.0  | 3.3  |
| 2022-05-24 7:00 AM  | 2.5  | 6.2  | 3.8  | 4.2  |
| 2022-05-24 8:00 AM  | 4.8  | 6.9  | 5.5  | 5.7  |
| 2022-05-24 9:00 AM  | 9.9  | 8.9  | 8.3  | 9.0  |
| 2022-05-24 10:00 AM | 11.9 | 9.8  | 9.4  | 10.4 |
| 2022-05-24 11:00 AM | 12.8 | 11.0 | 9.7  | 11.2 |
| 2022-05-24 12:00 PM | 34.9 | 15.0 | 11.6 | 20.5 |
| 2022-05-24 1:00 PM  | 40.9 | 14.8 | 14.9 | 23.5 |
| 2022-05-24 2:00 PM  | 25.2 | 15.5 | 17.5 | 19.4 |
| 2022-05-24 3:00 PM  | 23.0 | 17.0 | 19.9 | 20.0 |
| 2022-05-24 4:00 PM  | 21.5 | 18.4 | 23.2 | 21.0 |
| 2022-05-24 5:00 PM  | 19.9 | 17.7 | 23.7 | 20.4 |
| 2022-05-24 6:00 PM  | 19.2 | 17.0 | 23.4 | 19.9 |
| 2022-05-24 7:00 PM  | 18.9 | 16.8 | 21.3 | 19.0 |
| 2022-05-24 8:00 PM  | 17.6 | 15.9 | 17.0 | 16.8 |
| 2022-05-24 9:00 PM  | 16.0 | 15.0 | 15.2 | 15.4 |
| 2022-05-24 10:00 PM | 13.4 | 13.8 | 13.6 | 13.6 |
| 2022-05-24 11:00 PM | 10.6 | 12.1 | 11.8 | 11.5 |
| 2022-05-25 12:00 AM | 9.6  | 11.3 | 10.8 | 10.6 |
| 2022-05-25 1:00 AM  | 9.0  | 10.7 | 10.1 | 9.9  |
| 2022-05-25 2:00 AM  | 8.7  | 10.4 | 9.5  | 9.5  |
| 2022-05-25 3:00 AM  | 8.4  | 10.0 | 9.0  | 9.1  |
| 2022-05-25 4:00 AM  | 8.0  | 9.7  | 8.4  | 8.7  |
| 2022-05-25 5:00 AM  | 7.8  | 9.4  | 8.0  | 8.4  |
| 2022-05-25 6:00 AM  | 7.7  | 9.3  | 7.7  | 8.2  |
| 2022-05-25 7:00 AM  | 7.9  | 9.3  | 8.3  | 8.5  |
| 2022-05-25 8:00 AM  | 8.7  | 9.9  | 8.8  | 9.1  |
| 2022-05-25 9:00 AM  | 9.2  | 10.4 | 9.7  | 9.8  |
| 2022-05-25 10:00 AM | 9.8  | 10.9 | 10.5 | 10.4 |
| 2022-05-25 11:00 AM | 10.1 | 11.1 | 10.8 | 10.7 |
| 2022-05-25 12:00 PM | 10.5 | 11.2 | 10.9 | 10.9 |
| 2022-05-25 1:00 PM  | 11.2 | 11.7 | 11.9 | 11.6 |

|                     |      |      |      |      |
|---------------------|------|------|------|------|
| 2022-05-25 2:00 PM  | 12.8 | 12.6 | 13.3 | 12.9 |
| 2022-05-25 3:00 PM  | 12.9 | 13.0 | 13.4 | 13.1 |
| 2022-05-25 4:00 PM  | 11.8 | 12.4 | 12.2 | 12.1 |
| 2022-05-25 5:00 PM  | 10.9 | 11.6 | 10.9 | 11.1 |
| 2022-05-25 6:00 PM  | 10.3 | 11.1 | 10.1 | 10.5 |
| 2022-05-25 7:00 PM  | 10.4 | 10.9 | 9.9  | 10.4 |
| 2022-05-25 8:00 PM  | 10.0 | 10.7 | 9.7  | 10.1 |
| 2022-05-25 9:00 PM  | 9.6  | 10.4 | 9.4  | 9.8  |
| 2022-05-25 10:00 PM | 9.4  | 10.2 | 9.2  | 9.6  |
| 2022-05-25 11:00 PM | 9.2  | 10.0 | 9.0  | 9.4  |
| 2022-05-26 12:00 AM | 9.3  | 9.9  | 9.0  | 9.4  |
| 2022-05-26 1:00 AM  | 9.4  | 10.0 | 9.3  | 9.6  |
| 2022-05-26 2:00 AM  | 9.5  | 10.0 | 9.3  | 9.6  |
| 2022-05-26 3:00 AM  | 9.5  | 10.0 | 9.3  | 9.6  |
| 2022-05-26 4:00 AM  | 9.5  | 10.1 | 9.4  | 9.7  |
| 2022-05-26 5:00 AM  | 9.5  | 10.1 | 9.3  | 9.6  |
| 2022-05-26 6:00 AM  | 9.5  | 9.9  | 9.2  | 9.5  |
| 2022-05-26 7:00 AM  | 9.4  | 9.8  | 9.1  | 9.4  |
| 2022-05-26 8:00 AM  | 9.7  | 9.9  | 9.4  | 9.7  |
| 2022-05-26 9:00 AM  | 10.3 | 10.3 | 10.0 | 10.2 |
| 2022-05-26 10:00 AM | 11.7 | 11.1 | 11.2 | 11.3 |
| 2022-05-26 11:00 AM | 13.7 | 12.2 | 12.6 | 12.8 |
| 2022-05-26 12:00 PM | 14.6 | 12.6 | 13.1 | 13.4 |
| 2022-05-26 1:00 PM  | 14.0 | 12.5 | 13.4 | 13.3 |
| 2022-05-26 2:00 PM  | 14.5 | 12.9 | 14.2 | 13.9 |
| 2022-05-26 3:00 PM  | 15.5 | 13.6 | 14.8 | 14.6 |
| 2022-05-26 4:00 PM  | 17.0 | 14.7 | 17.2 | 16.3 |
| 2022-05-26 5:00 PM  | 15.7 | 14.1 | 15.5 | 15.1 |
| 2022-05-26 6:00 PM  | 14.5 | 13.3 | 15.0 | 14.3 |
| 2022-05-26 7:00 PM  | 14.4 | 13.3 | 14.7 | 14.1 |
| 2022-05-26 8:00 PM  | 14.0 | 13.2 | 14.4 | 13.9 |
| 2022-05-26 9:00 PM  | 13.1 | 12.8 | 13.9 | 13.3 |
| 2022-05-26 10:00 PM | 12.3 | 12.5 | 12.9 | 12.6 |
| 2022-05-26 11:00 PM | 11.9 | 12.4 | 12.4 | 12.2 |
| 2022-05-27 12:00 AM | 11.7 | 12.2 | 12.2 | 12.0 |
| 2022-05-27 1:00 AM  | 11.4 | 12.1 | 11.9 | 11.8 |
| 2022-05-27 2:00 AM  | 11.1 | 11.9 | 11.6 | 11.5 |
| 2022-05-27 3:00 AM  | 10.9 | 11.7 | 11.6 | 11.4 |
| 2022-05-27 4:00 AM  | 10.6 | 11.5 | 11.5 | 11.2 |
| 2022-05-27 5:00 AM  | 10.3 | 11.3 | 11.3 | 11.0 |
| 2022-05-27 6:00 AM  | 10.3 | 11.3 | 11.2 | 10.9 |
| 2022-05-27 7:00 AM  | 10.6 | 11.3 | 10.9 | 10.9 |
| 2022-05-27 8:00 AM  | 10.6 | 11.3 | 10.8 | 10.9 |

|                     |      |      |      |      |
|---------------------|------|------|------|------|
| 2022-05-27 9:00 AM  | 10.4 | 11.3 | 11.0 | 10.9 |
| 2022-05-27 10:00 AM | 12.0 | 12.1 | 12.0 | 12.0 |
| 2022-05-27 11:00 AM | 16.8 | 14.3 | 14.1 | 15.1 |
| 2022-05-27 12:00 PM | 21.7 | 16.1 | 15.2 | 17.7 |
| 2022-05-27 1:00 PM  | 20.7 | 16.5 | 16.9 | 18.0 |
| 2022-05-27 2:00 PM  | 24.1 | 17.1 | 19.7 | 20.3 |
| 2022-05-27 3:00 PM  | 25.4 | 18.6 | 25.4 | 23.1 |
| 2022-05-27 4:00 PM  | 25.3 | 21.7 | 34.0 | 27.0 |
| 2022-05-27 5:00 PM  | 22.7 | 21.5 | 32.5 | 25.6 |
| 2022-05-27 6:00 PM  | 18.9 | 18.2 | 25.8 | 21.0 |
| 2022-05-27 7:00 PM  | 17.9 | 17.3 | 22.4 | 19.2 |
| 2022-05-27 8:00 PM  | 16.0 | 15.8 | 17.2 | 16.3 |
| 2022-05-27 9:00 PM  | 14.8 | 15.3 | 15.9 | 15.3 |
| 2022-05-27 10:00 PM | 12.7 | 14.0 | 13.9 | 13.5 |
| 2022-05-27 11:00 PM | 11.9 | 13.4 | 12.9 | 12.7 |
| 2022-05-28 12:00 AM | 12.0 | 13.1 | 12.4 | 12.5 |
| 2022-05-28 1:00 AM  | 10.9 | 12.4 | 11.4 | 11.6 |
| 2022-05-28 2:00 AM  | 10.1 | 11.9 | 10.9 | 11.0 |
| 2022-05-28 3:00 AM  | 9.5  | 11.4 | 10.3 | 10.4 |
| 2022-05-28 4:00 AM  | 9.5  | 11.3 | 9.6  | 10.1 |
| 2022-05-28 5:00 AM  | 9.5  | 11.3 | 9.2  | 10.0 |
| 2022-05-28 6:00 AM  | 9.7  | 11.2 | 9.2  | 10.0 |
| 2022-05-28 7:00 AM  | 10.1 | 11.4 | 9.8  | 10.4 |
| 2022-05-28 8:00 AM  | 10.6 | 11.7 | 11.0 | 11.1 |
| 2022-05-28 9:00 AM  | 10.4 | 11.6 | 11.0 | 11.0 |
| 2022-05-28 10:00 AM | 10.7 | 11.7 | 10.7 | 11.0 |
| 2022-05-28 11:00 AM | 10.7 | 11.9 | 11.6 | 11.4 |
| 2022-05-28 12:00 PM | 11.5 | 12.4 | 12.3 | 12.1 |
| 2022-05-28 1:00 PM  | 11.5 | 12.6 | 12.3 | 12.1 |
| 2022-05-28 2:00 PM  | 12.3 | 13.2 | 13.3 | 12.9 |
| 2022-05-28 3:00 PM  | 12.1 | 13.1 | 12.9 | 12.7 |
| 2022-05-28 4:00 PM  | 11.6 | 12.7 | 12.1 | 12.1 |
| 2022-05-28 5:00 PM  | 11.1 | 12.4 | 11.4 | 11.6 |
| 2022-05-28 6:00 PM  | 11.5 | 12.3 | 11.6 | 11.8 |
| 2022-05-28 7:00 PM  | 11.7 | 12.4 | 11.9 | 12.0 |
| 2022-05-28 8:00 PM  | 11.3 | 12.2 | 11.5 | 11.7 |
| 2022-05-28 9:00 PM  | 11.0 | 11.9 | 11.1 | 11.3 |
| 2022-05-28 10:00 PM | 10.7 | 11.7 | 11.0 | 11.1 |
| 2022-05-28 11:00 PM | 10.6 | 11.5 | 10.7 | 10.9 |
| 2022-05-29 12:00 AM | 10.5 | 11.5 | 10.9 | 11.0 |
| 2022-05-29 1:00 AM  | 10.7 | 11.5 | 10.8 | 11.0 |
| 2022-05-29 2:00 AM  | 10.5 | 11.4 | 10.6 | 10.8 |
| 2022-05-29 3:00 AM  | 10.1 | 11.1 | 10.1 | 10.4 |

|                     |      |      |      |      |
|---------------------|------|------|------|------|
| 2022-05-29 4:00 AM  | 9.4  | 10.7 | 9.6  | 9.9  |
| 2022-05-29 5:00 AM  | 9.1  | 10.5 | 9.2  | 9.6  |
| 2022-05-29 6:00 AM  | 9.0  | 10.4 | 9.2  | 9.5  |
| 2022-05-29 7:00 AM  | 9.1  | 10.5 | 9.4  | 9.7  |
| 2022-05-29 8:00 AM  | 9.3  | 10.6 | 9.6  | 9.8  |
| 2022-05-29 9:00 AM  | 10.1 | 11.1 | 10.2 | 10.5 |
| 2022-05-29 10:00 AM | 11.4 | 11.9 | 11.1 | 11.5 |
| 2022-05-29 11:00 AM | 13.0 | 12.5 | 11.1 | 12.2 |
| 2022-05-29 12:00 PM | 18.7 | 14.7 | 12.4 | 15.3 |
| 2022-05-29 1:00 PM  | 17.7 | 15.0 | 14.2 | 15.6 |
| 2022-05-29 2:00 PM  | 16.5 | 14.9 | 14.8 | 15.4 |
| 2022-05-29 3:00 PM  | 16.2 | 15.1 | 15.5 | 15.6 |
| 2022-05-29 4:00 PM  | 14.4 | 14.5 | 14.2 | 14.4 |
| 2022-05-29 5:00 PM  | 13.0 | 13.5 | 12.5 | 13.0 |
| 2022-05-29 6:00 PM  | 14.0 | 14.1 | 15.9 | 14.7 |
| 2022-05-29 7:00 PM  | 14.4 | 14.4 | 16.2 | 15.0 |
| 2022-05-29 8:00 PM  | 13.5 | 13.7 | 14.1 | 13.8 |
| 2022-05-29 9:00 PM  | 12.6 | 13.2 | 12.9 | 12.9 |
| 2022-05-29 10:00 PM | 11.9 | 12.7 | 12.1 | 12.2 |
| 2022-05-29 11:00 PM | 12.0 | 12.7 | 12.2 | 12.3 |
| 2022-05-30 12:00 AM | 11.8 | 12.7 | 12.2 | 12.2 |
| 2022-05-30 1:00 AM  | 11.6 | 12.5 | 11.8 | 12.0 |
| 2022-05-30 2:00 AM  | 11.5 | 12.4 | 11.7 | 11.9 |
| 2022-05-30 3:00 AM  | 11.4 | 12.3 | 11.6 | 11.8 |
| 2022-05-30 4:00 AM  | 10.9 | 11.9 | 11.0 | 11.3 |
| 2022-05-30 5:00 AM  | 10.7 | 11.8 | 11.1 | 11.2 |
| 2022-05-30 6:00 AM  | 10.6 | 11.8 | 11.0 | 11.1 |
| 2022-05-30 7:00 AM  | 10.6 | 11.8 | 11.2 | 11.2 |
| 2022-05-30 8:00 AM  | 11.2 | 12.2 | 11.6 | 11.7 |
| 2022-05-30 9:00 AM  | 11.0 | 12.1 | 11.4 | 11.5 |
| 2022-05-30 10:00 AM | 10.6 | 11.6 | 11.0 | 11.1 |
| 2022-05-30 11:00 AM | 11.8 | 12.4 | 12.7 | 12.3 |
| 2022-05-30 12:00 PM | 12.3 | 12.8 | 12.7 | 12.6 |
| 2022-05-30 1:00 PM  | 14.5 | 13.7 | 14.1 | 14.1 |
| 2022-05-30 2:00 PM  | 12.2 | 12.6 | 12.2 | 12.3 |
| 2022-05-30 3:00 PM  | 13.1 | 13.4 | 13.7 | 13.4 |
| 2022-05-30 4:00 PM  | 15.4 | 14.8 | 17.1 | 15.8 |
| 2022-05-30 5:00 PM  | 17.4 | 16.2 | 23.5 | 19.0 |
| 2022-05-30 6:00 PM  | 17.1 | 15.9 | 22.3 | 18.4 |
| 2022-05-30 7:00 PM  | 16.0 | 15.3 | 18.0 | 16.4 |
| 2022-05-30 8:00 PM  | 15.3 | 14.9 | 16.5 | 15.6 |
| 2022-05-30 9:00 PM  | 14.6 | 14.5 | 15.6 | 14.9 |
| 2022-05-30 10:00 PM | 13.6 | 13.8 | 14.1 | 13.8 |

|                     |      |      |      |      |
|---------------------|------|------|------|------|
| 2022-05-30 11:00 PM | 12.6 | 13.3 | 13.1 | 13.0 |
| 2022-05-31 12:00 AM | 12.4 | 13.1 | 12.9 | 12.8 |
| 2022-05-31 1:00 AM  | 12.3 | 13.0 | 12.8 | 12.7 |
| 2022-05-31 2:00 AM  | 11.8 | 12.8 | 12.3 | 12.3 |
| 2022-05-31 3:00 AM  | 11.2 | 12.4 | 11.9 | 11.8 |
| 2022-05-31 4:00 AM  | 10.9 | 12.2 | 11.4 | 11.5 |
| 2022-05-31 5:00 AM  | 10.6 | 11.9 | 11.2 | 11.2 |
| 2022-05-31 6:00 AM  | 10.6 | 11.9 | 11.0 | 11.2 |
| 2022-05-31 7:00 AM  | 10.6 | 11.8 | 10.8 | 11.1 |
| 2022-05-31 8:00 AM  | 11.0 | 12.1 | 11.4 | 11.5 |
| 2022-05-31 9:00 AM  | 11.8 | 12.6 | 12.2 | 12.2 |
| 2022-05-31 10:00 AM | 13.3 | 13.3 | 13.7 | 13.4 |
| 2022-05-31 11:00 AM | 16.0 | 14.3 | 14.2 | 14.8 |
| 2022-05-31 12:00 PM | 22.3 | 17.2 | 17.4 | 19.0 |
| 2022-05-31 1:00 PM  | 21.6 | 17.7 | 19.4 | 19.6 |
| 2022-05-31 2:00 PM  | 20.6 | 17.9 | 20.0 | 19.5 |
| 2022-05-31 3:00 PM  | 20.7 | 18.4 | 20.7 | 19.9 |
| 2022-05-31 4:00 PM  | 21.2 | 18.9 | 22.3 | 20.8 |
| 2022-05-31 5:00 PM  | 19.4 | 18.0 | 21.0 | 19.5 |
| 2022-05-31 6:00 PM  | 19.6 | 18.1 | 23.2 | 20.3 |
| 2022-05-31 7:00 PM  | 17.6 | 16.7 | 18.1 | 17.5 |
| 2022-05-31 8:00 PM  | 16.7 | 16.0 | 17.0 | 16.6 |
| 2022-05-31 9:00 PM  | 15.8 | 15.3 | 16.0 | 15.7 |
| 2022-05-31 10:00 PM | 14.5 | 14.4 | 14.7 | 14.5 |
| 2022-05-31 11:00 PM | 13.2 | 13.6 | 13.5 | 13.4 |
| 2022-06-01 12:00 AM | 12.7 | 13.3 | 13.0 | 13.0 |
| 2022-06-01 1:00 AM  | 11.7 | 12.6 | 11.9 | 12.1 |
| 2022-06-01 2:00 AM  | 11.0 | 12.1 | 11.3 | 11.5 |
| 2022-06-01 3:00 AM  | 10.8 | 11.9 | 11.1 | 11.3 |
| 2022-06-01 4:00 AM  | 10.8 | 11.8 | 11.0 | 11.2 |
| 2022-06-01 5:00 AM  | 10.7 | 11.5 | 10.2 | 10.8 |
| 2022-06-01 6:00 AM  | 10.2 | 11.1 | 9.7  | 10.3 |
| 2022-06-01 7:00 AM  | 9.6  | 10.8 | 9.1  | 9.8  |
| 2022-06-01 8:00 AM  | 10.4 | 11.1 | 9.7  | 10.4 |
| 2022-06-01 9:00 AM  | 10.7 | 11.0 | 9.6  | 10.4 |
| 2022-06-01 10:00 AM | 11.4 | 11.5 | 10.6 | 11.2 |
| 2022-06-01 11:00 AM | 13.6 | 12.1 | 11.6 | 12.4 |
| 2022-06-01 12:00 PM | 20.5 | 13.9 | 11.7 | 15.4 |
| 2022-06-01 1:00 PM  | 22.4 | 15.0 | 14.2 | 17.2 |
| 2022-06-01 2:00 PM  | 22.9 | 16.2 | 16.8 | 18.6 |
| 2022-06-01 3:00 PM  | 24.3 | 17.4 | 21.3 | 21.0 |
| 2022-06-01 4:00 PM  | 24.3 | 19.8 | 28.5 | 24.2 |
| 2022-06-01 5:00 PM  | 23.7 | 21.4 | 32.6 | 25.9 |



|                     |      |      |      |      |
|---------------------|------|------|------|------|
| 2022-06-01 6:00 PM  | 21.1 | 20.0 | 32.9 | 24.7 |
| 2022-06-01 7:00 PM  | 18.2 | 17.8 | 22.2 | 19.4 |
| 2022-06-01 8:00 PM  | 16.7 | 16.8 | 17.7 | 17.1 |
| 2022-06-01 9:00 PM  | 14.9 | 15.4 | 15.9 | 15.4 |
| 2022-06-01 10:00 PM | 13.3 | 13.9 | 14.0 | 13.7 |
| 2022-06-01 11:00 PM | 12.1 | 13.0 | 12.3 | 12.5 |
| 2022-06-02 12:00 AM | 11.2 | 12.2 | 11.1 | 11.5 |
| 2022-06-02 1:00 AM  | 10.6 | 11.5 | 10.5 | 10.9 |
| 2022-06-02 2:00 AM  | 9.9  | 11.1 | 9.6  | 10.2 |
| 2022-06-02 3:00 AM  | 9.7  | 11.1 | 9.0  | 9.9  |
| 2022-06-02 4:00 AM  | 9.5  | 10.8 | 8.5  | 9.6  |
| 2022-06-02 5:00 AM  | 9.0  | 10.1 | 8.2  | 9.1  |
| 2022-06-02 6:00 AM  | 8.6  | 9.8  | 7.2  | 8.5  |
| 2022-06-02 7:00 AM  | 8.6  | 9.6  | 6.9  | 8.4  |
| 2022-06-02 8:00 AM  | 9.3  | 10.2 | 9.1  | 9.5  |
| 2022-06-02 9:00 AM  | 10.1 | 11.3 | 10.6 | 10.7 |
| 2022-06-02 10:00 AM | 11.3 | 12.1 | 11.4 | 11.6 |
| 2022-06-02 11:00 AM | 13.7 | 13.5 | 11.9 | 13.0 |
| 2022-06-02 12:00 PM | 18.7 | 16.1 | 12.8 | 15.9 |
| 2022-06-02 1:00 PM  | 22.0 | 16.1 | 15.3 | 17.8 |
| 2022-06-02 2:00 PM  | 24.0 | 17.3 | 18.8 | 20.0 |
| 2022-06-02 3:00 PM  | 20.1 | 17.1 | 19.1 | 18.8 |
| 2022-06-02 4:00 PM  | 17.1 | 16.2 | 16.6 | 16.6 |
| 2022-06-02 5:00 PM  | 19.4 | 18.5 | 23.9 | 20.6 |
| 2022-06-02 6:00 PM  | 18.9 | 18.3 | 23.9 | 20.4 |
| 2022-06-02 7:00 PM  | 17.1 | 16.8 | 19.1 | 17.7 |
| 2022-06-02 8:00 PM  | 15.7 | 15.7 | 16.5 | 16.0 |
| 2022-06-02 9:00 PM  | 14.3 | 14.5 | 15.0 | 14.6 |
| 2022-06-02 10:00 PM | 13.2 | 13.8 | 13.8 | 13.6 |
| 2022-06-02 11:00 PM | 12.7 | 13.4 | 13.4 | 13.2 |
| 2022-06-03 12:00 AM | 12.2 | 12.9 | 12.5 | 12.5 |
| 2022-06-03 1:00 AM  | 12.2 | 12.9 | 12.6 | 12.6 |
| 2022-06-03 2:00 AM  | 12.1 | 12.7 | 12.2 | 12.3 |
| 2022-06-03 3:00 AM  | 11.7 | 12.1 | 11.3 | 11.7 |
| 2022-06-03 4:00 AM  | 11.5 | 12.0 | 11.1 | 11.5 |
| 2022-06-03 5:00 AM  | 11.2 | 11.8 | 10.7 | 11.2 |
| 2022-06-03 6:00 AM  | 10.9 | 11.4 | 10.2 | 10.8 |
| 2022-06-03 7:00 AM  | 10.6 | 11.1 | 9.4  | 10.4 |
| 2022-06-03 8:00 AM  | 10.6 | 11.0 | 9.2  | 10.3 |
| 2022-06-03 9:00 AM  | 11.0 | 11.3 | 9.5  | 10.6 |
| 2022-06-03 10:00 AM | 11.9 | 11.6 | 10.3 | 11.3 |
| 2022-06-03 11:00 AM | 13.5 | 12.7 | 11.3 | 12.5 |
| 2022-06-03 12:00 PM | 18.4 | 14.8 | 12.2 | 15.1 |

|                     |      |      |      |      |
|---------------------|------|------|------|------|
| 2022-06-03 1:00 PM  | 18.9 | 14.9 | 13.6 | 15.8 |
| 2022-06-03 2:00 PM  | 21.2 | 15.3 | 15.3 | 17.3 |
| 2022-06-03 3:00 PM  | 20.7 | 15.3 | 16.1 | 17.4 |
| 2022-06-03 4:00 PM  | 19.9 | 17.1 | 21.8 | 19.6 |
| 2022-06-03 5:00 PM  | 17.4 | 15.8 | 17.6 | 16.9 |
| 2022-06-03 6:00 PM  | 15.2 | 13.8 | 13.4 | 14.1 |
| 2022-06-03 7:00 PM  | 14.4 | 13.5 | 12.4 | 13.4 |
| 2022-06-03 8:00 PM  | 13.5 | 12.7 | 12.2 | 12.8 |
| 2022-06-03 9:00 PM  | 12.7 | 12.6 | 12.2 | 12.5 |
| 2022-06-03 10:00 PM | 12.4 | 12.5 | 12.1 | 12.3 |
| 2022-06-03 11:00 PM | 11.6 | 11.9 | 11.4 | 11.6 |
| 2022-06-04 12:00 AM | 11.1 | 11.7 | 11.3 | 11.4 |
| 2022-06-04 1:00 AM  | 10.8 | 11.2 | 10.6 | 10.9 |
| 2022-06-04 2:00 AM  | 9.3  | 9.9  | 8.6  | 9.3  |
| 2022-06-04 3:00 AM  | 8.6  | 10.0 | 7.5  | 8.7  |
| 2022-06-04 4:00 AM  | 8.2  | 9.5  | 6.5  | 8.1  |
| 2022-06-04 5:00 AM  | 8.0  | 8.8  | 6.6  | 7.8  |
| 2022-06-04 6:00 AM  | 7.3  | 8.1  | 6.3  | 7.2  |
| 2022-06-04 7:00 AM  | 7.4  | 8.2  | 5.9  | 7.2  |
| 2022-06-04 8:00 AM  | 8.7  | 9.2  | 7.5  | 8.5  |
| 2022-06-04 9:00 AM  | 9.2  | 10.1 | 9.1  | 9.5  |
| 2022-06-04 10:00 AM | 9.7  | 10.8 | 9.7  | 10.1 |
| 2022-06-04 11:00 AM | 11.7 | 12.1 | 10.4 | 11.4 |
| 2022-06-04 12:00 PM | 18.1 | 15.3 | 11.5 | 15.0 |
| 2022-06-04 1:00 PM  | 20.4 | 15.5 | 14.1 | 16.7 |
| 2022-06-04 2:00 PM  | 20.3 | 15.9 | 16.5 | 17.6 |
| 2022-06-04 3:00 PM  | 22.1 | 17.1 | 21.3 | 20.2 |
| 2022-06-04 4:00 PM  | 22.3 | 18.8 | 26.2 | 22.4 |
| 2022-06-04 5:00 PM  | 21.1 | 20.6 | 32.0 | 24.6 |
| 2022-06-04 6:00 PM  | 17.2 | 17.5 | 26.7 | 20.5 |
| 2022-06-04 7:00 PM  | 15.1 | 15.8 | 19.4 | 16.8 |
| 2022-06-04 8:00 PM  | 13.2 | 14.2 | 14.6 | 14.0 |
| 2022-06-04 9:00 PM  | 12.3 | 13.2 | 12.9 | 12.8 |
| 2022-06-04 10:00 PM | 11.3 | 12.3 | 11.6 | 11.7 |
| 2022-06-04 11:00 PM | 10.7 | 11.6 | 10.8 | 11.0 |
| 2022-06-05 12:00 AM | 10.2 | 11.0 | 10.2 | 10.5 |
| 2022-06-05 1:00 AM  | 9.7  | 10.7 | 8.9  | 9.8  |
| 2022-06-05 2:00 AM  | 9.1  | 10.4 | 7.9  | 9.1  |
| 2022-06-05 3:00 AM  | 8.7  | 10.0 | 6.7  | 8.5  |
| 2022-06-05 4:00 AM  | 8.3  | 9.6  | 6.0  | 8.0  |
| 2022-06-05 5:00 AM  | 8.0  | 9.3  | 5.4  | 7.6  |
| 2022-06-05 6:00 AM  | 7.7  | 8.7  | 5.3  | 7.2  |
| 2022-06-05 7:00 AM  | 7.3  | 8.7  | 4.8  | 6.9  |

|                     |      |      |      |      |
|---------------------|------|------|------|------|
| 2022-06-05 8:00 AM  | 7.9  | 8.7  | 6.2  | 7.6  |
| 2022-06-05 9:00 AM  | 8.9  | 9.6  | 8.6  | 9.0  |
| 2022-06-05 10:00 AM | 9.8  | 10.8 | 9.7  | 10.1 |
| 2022-06-05 11:00 AM | 11.9 | 12.1 | 10.7 | 11.6 |
| 2022-06-05 12:00 PM | 17.0 | 14.9 | 12.9 | 14.9 |
| 2022-06-05 1:00 PM  | 19.7 | 15.8 | 15.4 | 17.0 |
| 2022-06-05 2:00 PM  | 22.2 | 16.2 | 17.9 | 18.8 |
| 2022-06-05 3:00 PM  | 23.7 | 17.0 | 22.1 | 20.9 |
| 2022-06-05 4:00 PM  | 21.6 | 19.3 | 25.9 | 22.3 |
| 2022-06-05 5:00 PM  | 18.7 | 18.7 | 23.9 | 20.4 |
| 2022-06-05 6:00 PM  | 19.1 | 18.6 | 28.5 | 22.1 |
| 2022-06-05 7:00 PM  | 16.1 | 16.6 | 20.1 | 17.6 |
| 2022-06-05 8:00 PM  | 13.9 | 15.0 | 15.4 | 14.8 |
| 2022-06-05 9:00 PM  | 12.3 | 14.0 | 13.7 | 13.3 |
| 2022-06-05 10:00 PM | 11.6 | 12.9 | 12.6 | 12.4 |
| 2022-06-05 11:00 PM | 11.2 | 12.7 | 11.9 | 11.9 |
| 2022-06-06 12:00 AM | 10.8 | 12.2 | 11.8 | 11.6 |
| 2022-06-06 1:00 AM  | 10.7 | 12.1 | 11.1 | 11.3 |
| 2022-06-06 2:00 AM  | 10.9 | 12.3 | 11.1 | 11.4 |
| 2022-06-06 3:00 AM  | 11.1 | 12.3 | 11.4 | 11.6 |
| 2022-06-06 4:00 AM  | 11.1 | 12.2 | 11.6 | 11.6 |
| 2022-06-06 5:00 AM  | 11.5 | 12.6 | 11.7 | 11.9 |
| 2022-06-06 6:00 AM  | 11.3 | 12.3 | 11.9 | 11.8 |
| 2022-06-06 7:00 AM  | 11.5 | 12.5 | 11.5 | 11.8 |
| 2022-06-06 8:00 AM  | 11.9 | 12.7 | 12.2 | 12.3 |
| 2022-06-06 9:00 AM  | 12.4 | 12.9 | 11.9 | 12.4 |
| 2022-06-06 10:00 AM | 12.4 | 12.8 | 11.6 | 12.3 |
| 2022-06-06 11:00 AM | 12.7 | 13.1 | 12.8 | 12.9 |
| 2022-06-06 12:00 PM | 13.3 | 13.2 | 12.2 | 12.9 |
| 2022-06-06 1:00 PM  | 14.9 | 13.9 | 13.4 | 14.1 |
| 2022-06-06 2:00 PM  | 21.6 | 16.1 | 17.8 | 18.5 |
| 2022-06-06 3:00 PM  | 26.1 | 17.8 | 23.8 | 22.6 |
| 2022-06-06 4:00 PM  | 25.4 | 20.4 | 31.0 | 25.6 |
| 2022-06-06 5:00 PM  | 24.6 | 21.4 | 31.9 | 26.0 |
| 2022-06-06 6:00 PM  | 21.3 | 19.4 | 29.7 | 23.5 |
| 2022-06-06 7:00 PM  | 18.6 | 17.7 | 21.9 | 19.4 |
| 2022-06-06 8:00 PM  | 16.1 | 16.5 | 17.9 | 16.8 |
| 2022-06-06 9:00 PM  | 15.4 | 16.1 | 16.9 | 16.1 |
| 2022-06-06 10:00 PM | 14.4 | 15.3 | 15.6 | 15.1 |
| 2022-06-06 11:00 PM | 12.6 | 13.8 | 13.5 | 13.3 |
| 2022-06-07 12:00 AM | 12.0 | 13.2 | 12.7 | 12.6 |
| 2022-06-07 1:00 AM  | 11.2 | 13.0 | 12.0 | 12.1 |
| 2022-06-07 2:00 AM  | 10.9 | 12.9 | 11.3 | 11.7 |

|                     |      |      |      |      |
|---------------------|------|------|------|------|
| 2022-06-07 3:00 AM  | 10.5 | 12.3 | 10.8 | 11.2 |
| 2022-06-07 4:00 AM  | 9.7  | 11.3 | 10.6 | 10.5 |
| 2022-06-07 5:00 AM  | 9.2  | 10.6 | 9.6  | 9.8  |
| 2022-06-07 6:00 AM  | 8.8  | 10.3 | 9.4  | 9.5  |
| 2022-06-07 7:00 AM  | 8.7  | 10.4 | 9.7  | 9.6  |
| 2022-06-07 8:00 AM  | 9.1  | 10.9 | 10.7 | 10.2 |
| 2022-06-07 9:00 AM  | 10.7 | 12.0 | 11.9 | 11.5 |
| 2022-06-07 10:00 AM | 13.0 | 13.9 | 13.6 | 13.5 |
| 2022-06-07 11:00 AM | 15.2 | 14.9 | 13.8 | 14.6 |
| 2022-06-07 12:00 PM | 16.7 | 15.3 | 15.0 | 15.7 |
| 2022-06-07 1:00 PM  | 19.8 | 16.3 | 17.1 | 17.7 |
| 2022-06-07 2:00 PM  | 19.4 | 16.8 | 17.0 | 17.7 |
| 2022-06-07 3:00 PM  | 19.6 | 16.9 | 20.1 | 18.9 |
| 2022-06-07 4:00 PM  | 22.8 | 19.3 | 25.3 | 22.5 |
| 2022-06-07 5:00 PM  | 20.3 | 18.8 | 23.7 | 20.9 |
| 2022-06-07 6:00 PM  | 19.1 | 18.1 | 24.2 | 20.5 |
| 2022-06-07 7:00 PM  | 18.0 | 17.3 | 20.0 | 18.4 |
| 2022-06-07 8:00 PM  | 16.4 | 16.2 | 17.1 | 16.6 |
| 2022-06-07 9:00 PM  | 15.5 | 15.9 | 16.3 | 15.9 |
| 2022-06-07 10:00 PM | 13.2 | 14.5 | 14.3 | 14.0 |
| 2022-06-07 11:00 PM | 12.7 | 14.1 | 13.8 | 13.5 |
| 2022-06-08 12:00 AM | 11.8 | 13.3 | 12.6 | 12.6 |
| 2022-06-08 1:00 AM  | 11.5 | 13.6 | 12.2 | 12.4 |
| 2022-06-08 2:00 AM  | 11.5 | 13.4 | 12.0 | 12.3 |
| 2022-06-08 3:00 AM  | 11.0 | 13.1 | 11.6 | 11.9 |
| 2022-06-08 4:00 AM  | 10.6 | 12.2 | 11.1 | 11.3 |
| 2022-06-08 5:00 AM  | 10.2 | 12.4 | 10.6 | 11.1 |
| 2022-06-08 6:00 AM  | 11.0 | 12.8 | 10.8 | 11.5 |
| 2022-06-08 7:00 AM  | 11.4 | 12.7 | 11.3 | 11.8 |
| 2022-06-08 8:00 AM  | 11.9 | 13.0 | 12.6 | 12.5 |
| 2022-06-08 9:00 AM  | 12.8 | 13.9 | 13.5 | 13.4 |
| 2022-06-08 10:00 AM | 13.7 | 14.1 | 14.1 | 14.0 |
| 2022-06-08 11:00 AM | 16.1 | 15.1 | 14.7 | 15.3 |
| 2022-06-08 12:00 PM | 23.8 | 18.1 | 16.1 | 19.3 |
| 2022-06-08 1:00 PM  | 22.9 | 17.6 | 18.3 | 19.6 |
| 2022-06-08 2:00 PM  | 21.1 | 17.1 | 17.8 | 18.7 |
| 2022-06-08 3:00 PM  | 15.1 | 15.7 | 15.2 | 15.3 |
| 2022-06-08 4:00 PM  | 15.4 | 15.7 | 15.4 | 15.5 |
| 2022-06-08 5:00 PM  | 16.8 | 16.4 | 17.1 | 16.8 |
| 2022-06-08 6:00 PM  | 18.3 | 17.6 | 21.0 | 19.0 |
| 2022-06-08 7:00 PM  | 17.4 | 16.9 | 19.5 | 17.9 |
| 2022-06-08 8:00 PM  | 16.8 | 16.6 | 17.4 | 16.9 |
| 2022-06-08 9:00 PM  | 15.6 | 16.0 | 16.3 | 16.0 |

|                     |      |      |      |      |
|---------------------|------|------|------|------|
| 2022-06-08 10:00 PM | 14.4 | 15.3 | 14.8 | 14.8 |
| 2022-06-08 11:00 PM | 13.3 | 14.7 | 14.1 | 14.0 |
| 2022-06-09 12:00 AM | 13.3 | 14.4 | 13.3 | 13.7 |
| 2022-06-09 1:00 AM  | 13.0 | 14.1 | 13.4 | 13.5 |
| 2022-06-09 2:00 AM  | 12.6 | 13.8 | 12.8 | 13.1 |
| 2022-06-09 3:00 AM  | 11.6 | 13.2 | 12.2 | 12.3 |
| 2022-06-09 4:00 AM  | 11.2 | 12.7 | 11.9 | 11.9 |
| 2022-06-09 5:00 AM  | 11.1 | 12.5 | 12.1 | 11.9 |
| 2022-06-09 6:00 AM  | 11.2 | 12.5 | 12.1 | 11.9 |
| 2022-06-09 7:00 AM  | 11.5 | 12.8 | 12.4 | 12.2 |
| 2022-06-09 8:00 AM  | 12.5 | 13.5 | 13.1 | 13.0 |
| 2022-06-09 9:00 AM  | 13.7 | 14.1 | 13.8 | 13.9 |
| 2022-06-09 10:00 AM | 13.3 | 13.7 | 13.8 | 13.6 |
| 2022-06-09 11:00 AM | 15.2 | 14.1 | 15.1 | 14.8 |
| 2022-06-09 12:00 PM | 20.9 | 15.3 | 17.3 | 17.8 |
| 2022-06-09 1:00 PM  | 25.0 | 16.8 | 19.9 | 20.6 |
| 2022-06-09 2:00 PM  | 21.5 | 16.3 | 17.3 | 18.4 |
| 2022-06-09 3:00 PM  | 22.5 | 17.4 | 19.8 | 19.9 |
| 2022-06-09 4:00 PM  | 25.0 | 19.0 | 25.6 | 23.2 |
| 2022-06-09 5:00 PM  | 21.3 | 17.8 | 23.0 | 20.7 |
| 2022-06-09 6:00 PM  | 19.8 | 17.8 | 26.2 | 21.3 |
| 2022-06-09 7:00 PM  | 18.4 | 17.1 | 22.1 | 19.2 |
| 2022-06-09 8:00 PM  | 16.8 | 16.4 | 18.5 | 17.2 |
| 2022-06-09 9:00 PM  | 16.3 | 16.4 | 17.9 | 16.9 |
| 2022-06-09 10:00 PM | 15.4 | 16.0 | 16.2 | 15.9 |
| 2022-06-09 11:00 PM | 13.6 | 14.9 | 14.6 | 14.4 |
| 2022-06-10 12:00 AM | 13.0 | 14.5 | 13.9 | 13.8 |
| 2022-06-10 1:00 AM  | 13.0 | 14.2 | 13.7 | 13.6 |
| 2022-06-10 2:00 AM  | 12.1 | 13.4 | 12.7 | 12.7 |
| 2022-06-10 3:00 AM  | 12.2 | 13.4 | 12.8 | 12.8 |
| 2022-06-10 4:00 AM  | 12.0 | 13.2 | 12.6 | 12.6 |
| 2022-06-10 5:00 AM  | 11.0 | 12.4 | 11.4 | 11.6 |
| 2022-06-10 6:00 AM  | 10.4 | 12.0 | 10.9 | 11.1 |
| 2022-06-10 7:00 AM  | 10.4 | 11.9 | 11.1 | 11.1 |
| 2022-06-10 8:00 AM  | 10.4 | 12.0 | 11.4 | 11.3 |
| 2022-06-10 9:00 AM  | 11.6 | 12.8 | 12.5 | 12.3 |
| 2022-06-10 10:00 AM | 13.1 | 13.7 | 13.3 | 13.4 |
| 2022-06-10 11:00 AM | 16.3 | 15.4 | 15.4 | 15.7 |
| 2022-06-10 12:00 PM | 22.1 | 17.0 | 18.3 | 19.1 |
| 2022-06-10 1:00 PM  | 25.7 | 17.9 | 20.3 | 21.3 |
| 2022-06-10 2:00 PM  | 27.5 | 18.7 | 21.7 | 22.6 |
| 2022-06-10 3:00 PM  | 29.5 | 19.7 | 25.3 | 24.8 |
| 2022-06-10 4:00 PM  | 30.0 | 22.1 | 33.7 | 28.6 |

|                     |      |      |      |      |
|---------------------|------|------|------|------|
| 2022-06-10 5:00 PM  | 27.7 | 23.4 | 34.9 | 28.7 |
| 2022-06-10 6:00 PM  | 23.7 | 21.2 | 34.2 | 26.4 |
| 2022-06-10 7:00 PM  | 20.1 | 19.0 | 24.4 | 21.2 |
| 2022-06-10 8:00 PM  | 17.8 | 17.8 | 21.4 | 19.0 |
| 2022-06-10 9:00 PM  | 17.0 | 17.4 | 20.2 | 18.2 |
| 2022-06-10 10:00 PM | 15.9 | 16.8 | 17.7 | 16.8 |
| 2022-06-10 11:00 PM | 13.8 | 15.0 | 14.5 | 14.4 |
| 2022-06-11 12:00 AM | 12.8 | 14.2 | 13.4 | 13.5 |
| 2022-06-11 1:00 AM  | 12.1 | 13.6 | 12.7 | 12.8 |
| 2022-06-11 2:00 AM  | 11.9 | 13.4 | 12.5 | 12.6 |
| 2022-06-11 3:00 AM  | 11.6 | 13.4 | 12.4 | 12.5 |
| 2022-06-11 4:00 AM  | 11.2 | 12.7 | 11.7 | 11.9 |
| 2022-06-11 5:00 AM  | 10.7 | 12.5 | 10.7 | 11.3 |
| 2022-06-11 6:00 AM  | 10.4 | 12.2 | 10.7 | 11.1 |
| 2022-06-11 7:00 AM  | 10.7 | 12.7 | 10.7 | 11.4 |
| 2022-06-11 8:00 AM  | 11.4 | 12.7 | 11.2 | 11.8 |
| 2022-06-11 9:00 AM  | 12.2 | 13.1 | 12.0 | 12.4 |
| 2022-06-11 10:00 AM | 14.1 | 14.2 | 13.7 | 14.0 |
| 2022-06-11 11:00 AM | 15.5 | 15.4 | 15.2 | 15.4 |
| 2022-06-11 12:00 PM | 16.7 | 16.1 | 15.8 | 16.2 |
| 2022-06-11 1:00 PM  | 24.1 | 17.6 | 17.9 | 19.9 |
| 2022-06-11 2:00 PM  | 25.9 | 18.4 | 20.2 | 21.5 |
| 2022-06-11 3:00 PM  | 26.4 | 19.5 | 25.1 | 23.7 |
| 2022-06-11 4:00 PM  | 26.7 | 22.0 | 34.1 | 27.6 |
| 2022-06-11 5:00 PM  | 23.2 | 23.0 | 34.6 | 26.9 |
| 2022-06-11 6:00 PM  | 19.7 | 20.5 | 33.1 | 24.4 |
| 2022-06-11 7:00 PM  | 17.2 | 18.3 | 22.6 | 19.4 |
| 2022-06-11 8:00 PM  | 15.0 | 16.6 | 17.5 | 16.4 |
| 2022-06-11 9:00 PM  | 14.3 | 15.8 | 16.3 | 15.5 |
| 2022-06-11 10:00 PM | 13.5 | 15.1 | 15.1 | 14.6 |
| 2022-06-11 11:00 PM | 12.5 | 14.2 | 13.6 | 13.4 |
| 2022-06-12 12:00 AM | 11.8 | 13.9 | 12.6 | 12.8 |
| 2022-06-12 1:00 AM  | 11.2 | 13.0 | 12.0 | 12.1 |
| 2022-06-12 2:00 AM  | 10.6 | 12.6 | 11.0 | 11.4 |
| 2022-06-12 3:00 AM  | 10.2 | 12.5 | 10.2 | 11.0 |
| 2022-06-12 4:00 AM  | 9.7  | 11.9 | 9.6  | 10.4 |
| 2022-06-12 5:00 AM  | 9.4  | 11.7 | 9.0  | 10.0 |
| 2022-06-12 6:00 AM  | 8.9  | 11.3 | 8.5  | 9.6  |
| 2022-06-12 7:00 AM  | 8.9  | 11.0 | 8.3  | 9.4  |
| 2022-06-12 8:00 AM  | 9.3  | 11.1 | 9.5  | 10.0 |
| 2022-06-12 9:00 AM  | 10.5 | 11.9 | 11.4 | 11.3 |
| 2022-06-12 10:00 AM | 11.9 | 13.0 | 12.6 | 12.5 |
| 2022-06-12 11:00 AM | 14.9 | 14.3 | 13.4 | 14.2 |

|                     |      |      |      |      |
|---------------------|------|------|------|------|
| 2022-06-12 12:00 PM | 21.5 | 16.5 | 14.9 | 17.6 |
| 2022-06-12 1:00 PM  | 23.1 | 16.8 | 16.7 | 18.9 |
| 2022-06-12 2:00 PM  | 22.1 | 17.3 | 18.1 | 19.2 |
| 2022-06-12 3:00 PM  | 21.1 | 17.9 | 21.0 | 20.0 |
| 2022-06-12 4:00 PM  | 21.7 | 19.2 | 26.5 | 22.5 |
| 2022-06-12 5:00 PM  | 17.9 | 17.7 | 20.8 | 18.8 |
| 2022-06-12 6:00 PM  | 17.4 | 17.8 | 21.5 | 18.9 |
| 2022-06-12 7:00 PM  | 16.6 | 17.2 | 18.4 | 17.4 |
| 2022-06-12 8:00 PM  | 15.6 | 16.4 | 17.1 | 16.4 |
| 2022-06-12 9:00 PM  | 15.0 | 16.0 | 16.3 | 15.8 |
| 2022-06-12 10:00 PM | 13.7 | 15.0 | 14.7 | 14.5 |
| 2022-06-12 11:00 PM | 13.1 | 14.4 | 14.0 | 13.8 |
| 2022-06-13 12:00 AM | 12.9 | 14.2 | 13.3 | 13.5 |
| 2022-06-13 1:00 AM  | 13.0 | 14.3 | 13.8 | 13.7 |
| 2022-06-13 2:00 AM  | 12.8 | 14.4 | 13.7 | 13.6 |
| 2022-06-13 3:00 AM  | 12.7 | 14.2 | 13.5 | 13.5 |
| 2022-06-13 4:00 AM  | 12.9 | 14.2 | 12.8 | 13.3 |
| 2022-06-13 5:00 AM  | 12.8 | 14.0 | 13.1 | 13.3 |
| 2022-06-13 6:00 AM  | 12.3 | 13.6 | 12.6 | 12.8 |
| 2022-06-13 7:00 AM  | 11.8 | 13.3 | 12.0 | 12.4 |
| 2022-06-13 8:00 AM  | 11.6 | 13.4 | 11.7 | 12.2 |
| 2022-06-13 9:00 AM  | 11.9 | 13.6 | 11.8 | 12.4 |
| 2022-06-13 10:00 AM | 12.5 | 14.1 | 12.3 | 13.0 |
| 2022-06-13 11:00 AM | 12.6 | 14.0 | 12.3 | 13.0 |
| 2022-06-13 12:00 PM | 12.8 | 14.2 | 12.7 | 13.2 |
| 2022-06-13 1:00 PM  | 13.3 | 14.6 | 13.6 | 13.8 |
| 2022-06-13 2:00 PM  | 13.5 | 14.7 | 13.6 | 13.9 |
| 2022-06-13 3:00 PM  | 12.9 | 14.3 | 13.0 | 13.4 |
| 2022-06-13 4:00 PM  | 12.6 | 14.2 | 12.7 | 13.2 |
| 2022-06-13 5:00 PM  | 12.4 | 13.9 | 12.3 | 12.9 |
| 2022-06-13 6:00 PM  | 12.4 | 13.7 | 11.8 | 12.6 |
| 2022-06-13 7:00 PM  | 12.2 | 13.6 | 12.0 | 12.6 |
| 2022-06-13 8:00 PM  | 12.3 | 13.5 | 11.7 | 12.5 |
| 2022-06-13 9:00 PM  | 12.7 | 13.5 | 11.9 | 12.7 |
| 2022-06-13 10:00 PM | 12.6 | 13.5 | 11.9 | 12.7 |
| 2022-06-13 11:00 PM | 12.2 | 13.2 | 11.7 | 12.4 |
| 2022-06-14 12:00 AM | 12.2 | 13.1 | 11.9 | 12.4 |
| 2022-06-14 1:00 AM  | 12.1 | 13.1 | 11.9 | 12.4 |
| 2022-06-14 2:00 AM  | 12.1 | 13.1 | 12.0 | 12.4 |
| 2022-06-14 3:00 AM  | 12.0 | 13.0 | 11.9 | 12.3 |
| 2022-06-14 4:00 AM  | 12.0 | 12.9 | 11.7 | 12.2 |
| 2022-06-14 5:00 AM  | 12.0 | 12.8 | 11.8 | 12.2 |
| 2022-06-14 6:00 AM  | 12.0 | 12.8 | 11.8 | 12.2 |

|                     |      |      |      |      |
|---------------------|------|------|------|------|
| 2022-06-14 7:00 AM  | 12.1 | 12.9 | 11.9 | 12.3 |
| 2022-06-14 8:00 AM  | 12.3 | 13.0 | 12.0 | 12.4 |
| 2022-06-14 9:00 AM  | 12.3 | 12.9 | 12.0 | 12.4 |
| 2022-06-14 10:00 AM | 12.4 | 13.0 | 12.3 | 12.6 |
| 2022-06-14 11:00 AM | 12.6 | 13.0 | 12.5 | 12.7 |
| 2022-06-14 12:00 PM | 12.4 | 12.9 | 12.2 | 12.5 |
| 2022-06-14 1:00 PM  | 12.6 | 13.1 | 12.4 | 12.7 |
| 2022-06-14 2:00 PM  | 12.8 | 13.4 | 12.6 | 12.9 |
| 2022-06-14 3:00 PM  | 13.4 | 13.7 | 13.2 | 13.4 |
| 2022-06-14 4:00 PM  | 14.2 | 14.1 | 14.1 | 14.1 |
| 2022-06-14 5:00 PM  | 14.5 | 14.4 | 14.5 | 14.5 |
| 2022-06-14 6:00 PM  | 14.6 | 14.4 | 14.7 | 14.6 |
| 2022-06-14 7:00 PM  | 14.8 | 14.6 | 14.9 | 14.8 |
| 2022-06-14 8:00 PM  | 14.5 | 14.4 | 14.5 | 14.5 |
| 2022-06-14 9:00 PM  | 13.7 | 14.0 | 13.7 | 13.8 |
| 2022-06-14 10:00 PM | 13.3 | 13.7 | 13.3 | 13.4 |
| 2022-06-14 11:00 PM | 13.2 | 13.7 | 13.4 | 13.4 |
| 2022-06-15 12:00 AM | 13.3 | 13.8 | 13.6 | 13.6 |
| 2022-06-15 1:00 AM  | 13.4 | 13.9 | 13.8 | 13.7 |
| 2022-06-15 2:00 AM  | 13.3 | 13.9 | 13.6 | 13.6 |
| 2022-06-15 3:00 AM  | 13.0 | 13.7 | 13.3 | 13.3 |
| 2022-06-15 4:00 AM  | 12.9 | 13.6 | 13.3 | 13.3 |
| 2022-06-15 5:00 AM  | 12.9 | 13.5 | 13.3 | 13.2 |
| 2022-06-15 6:00 AM  | 12.8 | 13.5 | 13.1 | 13.1 |
| 2022-06-15 7:00 AM  | 12.7 | 13.5 | 13.3 | 13.2 |
| 2022-06-15 8:00 AM  | 13.0 | 13.7 | 13.3 | 13.3 |
| 2022-06-15 9:00 AM  | 13.5 | 14.1 | 14.1 | 13.9 |
| 2022-06-15 10:00 AM | 15.0 | 15.0 | 15.1 | 15.0 |
| 2022-06-15 11:00 AM | 16.9 | 16.3 | 16.5 | 16.6 |
| 2022-06-15 12:00 PM | 18.2 | 17.0 | 17.7 | 17.6 |
| 2022-06-15 1:00 PM  | 20.4 | 17.9 | 19.2 | 19.2 |
| 2022-06-15 2:00 PM  | 18.0 | 17.1 | 17.6 | 17.6 |
| 2022-06-15 3:00 PM  | 20.0 | 18.0 | 20.4 | 19.5 |
| 2022-06-15 4:00 PM  | 22.1 | 19.1 | 23.7 | 21.6 |
| 2022-06-15 5:00 PM  | 19.8 | 18.9 | 22.1 | 20.3 |
| 2022-06-15 6:00 PM  | 18.4 | 18.1 | 19.1 | 18.5 |
| 2022-06-15 7:00 PM  | 17.8 | 17.6 | 18.4 | 17.9 |
| 2022-06-15 8:00 PM  | 16.5 | 17.0 | 17.2 | 16.9 |
| 2022-06-15 9:00 PM  | 16.0 | 16.8 | 16.6 | 16.5 |
| 2022-06-15 10:00 PM | 14.5 | 15.8 | 14.5 | 14.9 |
| 2022-06-15 11:00 PM | 13.8 | 15.1 | 13.7 | 14.2 |
| 2022-06-16 12:00 AM | 14.0 | 15.1 | 12.7 | 13.9 |
| 2022-06-16 1:00 AM  | 13.7 | 14.7 | 13.9 | 14.1 |



|                     |      |      |      |      |
|---------------------|------|------|------|------|
| 2022-06-16 2:00 AM  | 13.4 | 14.7 | 14.3 | 14.1 |
| 2022-06-16 3:00 AM  | 13.3 | 14.6 | 13.1 | 13.7 |
| 2022-06-16 4:00 AM  | 12.9 | 14.1 | 12.4 | 13.1 |
| 2022-06-16 5:00 AM  | 12.5 | 13.6 | 12.1 | 12.7 |
| 2022-06-16 6:00 AM  | 12.2 | 13.4 | 11.4 | 12.3 |
| 2022-06-16 7:00 AM  | 12.3 | 13.4 | 11.1 | 12.3 |
| 2022-06-16 8:00 AM  | 12.5 | 13.7 | 11.6 | 12.6 |
| 2022-06-16 9:00 AM  | 13.1 | 14.1 | 12.2 | 13.1 |
| 2022-06-16 10:00 AM | 14.1 | 14.7 | 13.4 | 14.1 |
| 2022-06-16 11:00 AM | 14.8 | 15.4 | 15.1 | 15.1 |
| 2022-06-16 12:00 PM | 19.6 | 17.6 | 16.1 | 17.8 |
| 2022-06-16 1:00 PM  | 20.4 | 17.9 | 17.6 | 18.6 |
| 2022-06-16 2:00 PM  | 20.8 | 17.9 | 18.4 | 19.0 |
| 2022-06-16 3:00 PM  | 20.6 | 17.8 | 18.7 | 19.0 |
| 2022-06-16 4:00 PM  | 20.0 | 17.9 | 20.7 | 19.5 |
| 2022-06-16 5:00 PM  | 19.8 | 18.1 | 20.9 | 19.6 |
| 2022-06-16 6:00 PM  | 19.3 | 18.1 | 24.1 | 20.5 |
| 2022-06-16 7:00 PM  | 18.4 | 17.5 | 20.0 | 18.6 |
| 2022-06-16 8:00 PM  | 17.2 | 17.0 | 18.5 | 17.6 |
| 2022-06-16 9:00 PM  | 16.6 | 16.7 | 17.8 | 17.0 |
| 2022-06-16 10:00 PM | 16.0 | 16.4 | 17.1 | 16.5 |
| 2022-06-16 11:00 PM | 15.5 | 16.1 | 16.7 | 16.1 |
| 2022-06-17 12:00 AM | 15.1 | 15.9 | 16.3 | 15.8 |
| 2022-06-17 1:00 AM  | 14.9 | 15.8 | 16.1 | 15.6 |
| 2022-06-17 2:00 AM  | 14.6 | 15.6 | 15.7 | 15.3 |
| 2022-06-17 3:00 AM  | 14.2 | 15.4 | 15.4 | 15.0 |
| 2022-06-17 4:00 AM  | 14.0 | 15.2 | 15.1 | 14.8 |
| 2022-06-17 5:00 AM  | 14.0 | 15.1 | 15.1 | 14.7 |
| 2022-06-17 6:00 AM  | 13.9 | 15.0 | 15.0 | 14.6 |
| 2022-06-17 7:00 AM  | 14.1 | 15.0 | 15.1 | 14.7 |
| 2022-06-17 8:00 AM  | 14.4 | 14.9 | 15.4 | 14.9 |
| 2022-06-17 9:00 AM  | 14.2 | 14.7 | 15.5 | 14.8 |
| 2022-06-17 10:00 AM | 14.2 | 14.5 | 15.6 | 14.8 |
| 2022-06-17 11:00 AM | 15.3 | 14.5 | 15.9 | 15.2 |
| 2022-06-17 12:00 PM | 21.2 | 16.4 | 17.4 | 18.3 |
| 2022-06-17 1:00 PM  | 24.8 | 17.3 | 19.6 | 20.6 |
| 2022-06-17 2:00 PM  | 26.8 | 17.9 | 21.3 | 22.0 |
| 2022-06-17 3:00 PM  | 27.4 | 18.8 | 23.8 | 23.3 |
| 2022-06-17 4:00 PM  | 25.9 | 20.3 | 28.6 | 24.9 |
| 2022-06-17 5:00 PM  | 23.7 | 20.6 | 30.3 | 24.9 |
| 2022-06-17 6:00 PM  | 21.6 | 19.1 | 30.7 | 23.8 |
| 2022-06-17 7:00 PM  | 18.9 | 17.7 | 22.9 | 19.8 |
| 2022-06-17 8:00 PM  | 17.1 | 16.9 | 19.8 | 17.9 |

|                     |      |      |      |      |
|---------------------|------|------|------|------|
| 2022-06-17 9:00 PM  | 16.1 | 16.8 | 18.6 | 17.2 |
| 2022-06-17 10:00 PM | 15.0 | 16.0 | 16.4 | 15.8 |
| 2022-06-17 11:00 PM | 13.6 | 15.2 | 14.8 | 14.5 |
| 2022-06-18 12:00 AM | 12.9 | 14.8 | 14.1 | 13.9 |
| 2022-06-18 1:00 AM  | 12.2 | 14.2 | 13.2 | 13.2 |
| 2022-06-18 2:00 AM  | 11.8 | 14.0 | 12.2 | 12.7 |
| 2022-06-18 3:00 AM  | 11.4 | 13.4 | 11.7 | 12.2 |
| 2022-06-18 4:00 AM  | 10.6 | 12.7 | 10.9 | 11.4 |
| 2022-06-18 5:00 AM  | 10.1 | 12.4 | 10.0 | 10.8 |
| 2022-06-18 6:00 AM  | 9.3  | 11.5 | 9.4  | 10.1 |
| 2022-06-18 7:00 AM  | 9.3  | 11.6 | 9.0  | 10.0 |
| 2022-06-18 8:00 AM  | 10.0 | 11.7 | 10.4 | 10.7 |
| 2022-06-18 9:00 AM  | 11.4 | 12.8 | 12.5 | 12.2 |
| 2022-06-18 10:00 AM | 12.7 | 13.9 | 13.4 | 13.3 |
| 2022-06-18 11:00 AM | 14.3 | 14.6 | 14.0 | 14.3 |
| 2022-06-18 12:00 PM | 18.1 | 16.5 | 14.8 | 16.5 |
| 2022-06-18 1:00 PM  | 20.1 | 17.1 | 16.7 | 18.0 |
| 2022-06-18 2:00 PM  | 23.7 | 17.8 | 19.2 | 20.2 |
| 2022-06-18 3:00 PM  | 22.7 | 18.4 | 21.3 | 20.8 |
| 2022-06-18 4:00 PM  | 21.5 | 19.1 | 25.2 | 21.9 |
| 2022-06-18 5:00 PM  | 20.2 | 19.8 | 27.4 | 22.5 |
| 2022-06-18 6:00 PM  | 18.0 | 18.5 | 26.6 | 21.0 |
| 2022-06-18 7:00 PM  | 16.3 | 17.3 | 20.1 | 17.9 |
| 2022-06-18 8:00 PM  | 15.3 | 16.5 | 17.6 | 16.5 |
| 2022-06-18 9:00 PM  | 14.5 | 15.6 | 16.1 | 15.4 |
| 2022-06-18 10:00 PM | 13.4 | 14.7 | 14.7 | 14.3 |
| 2022-06-18 11:00 PM | 12.5 | 13.9 | 13.5 | 13.3 |
| 2022-06-19 12:00 AM | 11.8 | 13.5 | 12.4 | 12.6 |
| 2022-06-19 1:00 AM  | 11.9 | 13.7 | 12.2 | 12.6 |
| 2022-06-19 2:00 AM  | 12.0 | 13.9 | 11.8 | 12.6 |
| 2022-06-19 3:00 AM  | 12.4 | 13.9 | 13.1 | 13.1 |
| 2022-06-19 4:00 AM  | 11.9 | 13.4 | 12.3 | 12.5 |
| 2022-06-19 5:00 AM  | 11.6 | 13.0 | 12.3 | 12.3 |
| 2022-06-19 6:00 AM  | 11.7 | 13.1 | 12.7 | 12.5 |
| 2022-06-19 7:00 AM  | 11.3 | 12.8 | 12.4 | 12.2 |
| 2022-06-19 8:00 AM  | 11.6 | 13.1 | 12.3 | 12.3 |
| 2022-06-19 9:00 AM  | 11.9 | 13.2 | 12.4 | 12.5 |
| 2022-06-19 10:00 AM | 10.4 | 11.4 | 10.4 | 10.7 |
| 2022-06-19 11:00 AM | 9.5  | 10.9 | 10.0 | 10.1 |
| 2022-06-19 12:00 PM | 10.2 | 11.6 | 10.7 | 10.8 |
| 2022-06-19 1:00 PM  | 11.8 | 12.6 | 12.6 | 12.3 |
| 2022-06-19 2:00 PM  | 14.2 | 13.9 | 14.4 | 14.2 |
| 2022-06-19 3:00 PM  | 18.4 | 15.5 | 17.6 | 17.2 |

|                     |      |      |      |      |
|---------------------|------|------|------|------|
| 2022-06-19 4:00 PM  | 15.9 | 15.4 | 16.9 | 16.1 |
| 2022-06-19 5:00 PM  | 15.5 | 15.9 | 18.3 | 16.6 |
| 2022-06-19 6:00 PM  | 15.1 | 15.2 | 15.9 | 15.4 |
| 2022-06-19 7:00 PM  | 14.6 | 15.0 | 15.5 | 15.0 |
| 2022-06-19 8:00 PM  | 14.2 | 14.8 | 15.1 | 14.7 |
| 2022-06-19 9:00 PM  | 13.3 | 14.3 | 14.1 | 13.9 |
| 2022-06-19 10:00 PM | 12.4 | 13.6 | 12.9 | 13.0 |
| 2022-06-19 11:00 PM | 12.2 | 13.4 | 12.5 | 12.7 |
| 2022-06-20 12:00 AM | 12.0 | 13.2 | 12.5 | 12.6 |
| 2022-06-20 1:00 AM  | 12.1 | 13.2 | 12.7 | 12.7 |
| 2022-06-20 2:00 AM  | 12.0 | 13.2 | 12.6 | 12.6 |
| 2022-06-20 3:00 AM  | 12.0 | 13.2 | 12.5 | 12.6 |
| 2022-06-20 4:00 AM  | 11.9 | 13.0 | 12.6 | 12.5 |
| 2022-06-20 5:00 AM  | 11.7 | 12.7 | 12.6 | 12.3 |
| 2022-06-20 6:00 AM  | 11.5 | 12.4 | 12.2 | 12.0 |
| 2022-06-20 7:00 AM  | 11.8 | 12.6 | 12.5 | 12.3 |
| 2022-06-20 8:00 AM  | 12.2 | 13.3 | 13.2 | 12.9 |
| 2022-06-20 9:00 AM  | 12.3 | 13.3 | 12.9 | 12.8 |
| 2022-06-20 10:00 AM | 12.8 | 13.6 | 13.2 | 13.2 |
| 2022-06-20 11:00 AM | 14.2 | 14.2 | 13.5 | 14.0 |
| 2022-06-20 12:00 PM | 20.0 | 16.8 | 14.6 | 17.1 |
| 2022-06-20 1:00 PM  | 23.4 | 17.6 | 17.4 | 19.5 |
| 2022-06-20 2:00 PM  | 24.9 | 18.3 | 19.8 | 21.0 |
| 2022-06-20 3:00 PM  | 25.5 | 18.9 | 22.7 | 22.4 |
| 2022-06-20 4:00 PM  | 24.9 | 20.3 | 26.8 | 24.0 |
| 2022-06-20 5:00 PM  | 22.5 | 21.1 | 28.9 | 24.2 |
| 2022-06-20 6:00 PM  | 21.0 | 20.0 | 29.8 | 23.6 |
| 2022-06-20 7:00 PM  | 19.7 | 19.1 | 23.9 | 20.9 |
| 2022-06-20 8:00 PM  | 18.6 | 18.5 | 20.3 | 19.1 |
| 2022-06-20 9:00 PM  | 18.3 | 18.4 | 20.0 | 18.9 |
| 2022-06-20 10:00 PM | 17.9 | 18.1 | 19.4 | 18.5 |
| 2022-06-20 11:00 PM | 17.0 | 17.6 | 18.3 | 17.6 |
| 2022-06-21 12:00 AM | 16.5 | 17.3 | 17.7 | 17.2 |
| 2022-06-21 1:00 AM  | 16.3 | 17.1 | 17.5 | 17.0 |
| 2022-06-21 2:00 AM  | 16.3 | 17.0 | 17.5 | 16.9 |
| 2022-06-21 3:00 AM  | 17.4 | 17.8 | 19.3 | 18.2 |
| 2022-06-21 4:00 AM  | 17.7 | 17.8 | 18.8 | 18.1 |
| 2022-06-21 5:00 AM  | 17.5 | 17.7 | 18.6 | 17.9 |
| 2022-06-21 6:00 AM  | 17.5 | 17.7 | 18.4 | 17.9 |
| 2022-06-21 7:00 AM  | 17.4 | 17.5 | 18.8 | 17.9 |
| 2022-06-21 8:00 AM  | 17.4 | 17.6 | 18.4 | 17.8 |
| 2022-06-21 9:00 AM  | 17.3 | 17.4 | 16.9 | 17.2 |
| 2022-06-21 10:00 AM | 17.5 | 17.8 | 18.0 | 17.8 |

|                     |      |      |      |      |
|---------------------|------|------|------|------|
| 2022-06-21 11:00 AM | 18.2 | 18.3 | 18.8 | 18.4 |
| 2022-06-21 12:00 PM | 21.6 | 20.3 | 20.2 | 20.7 |
| 2022-06-21 1:00 PM  | 25.2 | 21.9 | 22.5 | 23.2 |
| 2022-06-21 2:00 PM  | 26.9 | 22.6 | 24.0 | 24.5 |
| 2022-06-21 3:00 PM  | 28.6 | 22.9 | 26.2 | 25.9 |
| 2022-06-21 4:00 PM  | 28.0 | 24.0 | 28.2 | 26.7 |
| 2022-06-21 5:00 PM  | 27.8 | 24.2 | 27.9 | 26.6 |
| 2022-06-21 6:00 PM  | 26.1 | 23.0 | 29.7 | 26.3 |
| 2022-06-21 7:00 PM  | 23.8 | 21.7 | 24.7 | 23.4 |
| 2022-06-21 8:00 PM  | 21.7 | 20.9 | 22.1 | 21.6 |
| 2022-06-21 9:00 PM  | 20.9 | 20.6 | 21.4 | 21.0 |
| 2022-06-21 10:00 PM | 20.0 | 20.3 | 21.0 | 20.4 |
| 2022-06-21 11:00 PM | 19.0 | 19.9 | 20.4 | 19.8 |
| 2022-06-22 12:00 AM | 18.3 | 19.5 | 19.9 | 19.2 |
| 2022-06-22 1:00 AM  | 18.0 | 19.1 | 19.5 | 18.9 |
| 2022-06-22 2:00 AM  | 17.6 | 18.8 | 19.1 | 18.5 |
| 2022-06-22 3:00 AM  | 17.4 | 18.6 | 18.8 | 18.3 |
| 2022-06-22 4:00 AM  | 17.1 | 18.4 | 18.1 | 17.9 |
| 2022-06-22 5:00 AM  | 16.2 | 17.8 | 17.0 | 17.0 |
| 2022-06-22 6:00 AM  | 15.7 | 17.4 | 16.6 | 16.6 |
| 2022-06-22 7:00 AM  | 15.5 | 17.2 | 16.5 | 16.4 |
| 2022-06-22 8:00 AM  | 16.1 | 17.4 | 16.4 | 16.6 |
| 2022-06-22 9:00 AM  | 16.2 | 17.0 | 15.6 | 16.3 |
| 2022-06-22 10:00 AM | 15.9 | 16.7 | 15.8 | 16.1 |
| 2022-06-22 11:00 AM | 18.0 | 17.3 | 16.6 | 17.3 |
| 2022-06-22 12:00 PM | 24.4 | 18.8 | 18.3 | 20.5 |
| 2022-06-22 1:00 PM  | 27.0 | 19.4 | 20.7 | 22.4 |
| 2022-06-22 2:00 PM  | 28.8 | 20.5 | 22.3 | 23.9 |
| 2022-06-22 3:00 PM  | 28.1 | 20.9 | 23.6 | 24.2 |
| 2022-06-22 4:00 PM  | 26.9 | 21.5 | 25.0 | 24.5 |

**Table S4:** Hourly air temperature under 30% shade from May 10 to September 23, 2023.

|                    | Port 1                      | Port 2                      | Port 3                      | Average                     |
|--------------------|-----------------------------|-----------------------------|-----------------------------|-----------------------------|
|                    | 5TE<br>Moisture/<br>Temp/EC | 5TE<br>Moisture/<br>Temp/EC | 5TE<br>Moisture/<br>Temp/EC | 5TE<br>Moisture/<br>Temp/EC |
| Measurement Time   | °C Temp                     | °C Temp                     | °C Temp                     | °C Temp                     |
| 2022-05-11 2:00 PM | 18.4                        | 20.1                        | 21.2                        | 19.9                        |
| 2022-05-11 3:00 PM | 18.4                        | 21.1                        | 21.0                        | 20.2                        |
| 2022-05-11 4:00 PM | 18.6                        | 24.9                        | 21.0                        | 21.5                        |

|                     |      |      |      |      |
|---------------------|------|------|------|------|
| 2022-05-11 5:00 PM  | 18.5 | 21.5 | 20.2 | 20.1 |
| 2022-05-11 6:00 PM  | 17.1 | 17.8 | 18.2 | 17.7 |
| 2022-05-11 7:00 PM  | 15.7 | 16.2 | 16.6 | 16.2 |
| 2022-05-11 8:00 PM  | 15.0 | 15.8 | 15.6 | 15.5 |
| 2022-05-11 9:00 PM  | 14.0 | 14.7 | 14.8 | 14.5 |
| 2022-05-11 10:00 PM | 12.5 | 12.7 | 13.1 | 12.8 |
| 2022-05-11 11:00 PM | 11.8 | 12.0 | 12.0 | 11.9 |
| 2022-05-12 12:00 AM | 11.4 | 11.6 | 11.6 | 11.5 |
| 2022-05-12 1:00 AM  | 10.8 | 10.9 | 10.6 | 10.8 |
| 2022-05-12 2:00 AM  | 11.6 | 11.9 | 11.7 | 11.7 |
| 2022-05-12 3:00 AM  | 12.4 | 12.7 | 13.2 | 12.8 |
| 2022-05-12 4:00 AM  | 9.8  | 9.8  | 9.6  | 9.7  |
| 2022-05-12 5:00 AM  | 10.0 | 10.2 | 9.7  | 10.0 |
| 2022-05-12 6:00 AM  | 10.5 | 10.7 | 10.3 | 10.5 |
| 2022-05-12 7:00 AM  | 10.4 | 10.5 | 10.2 | 10.4 |
| 2022-05-12 8:00 AM  | 9.9  | 10.0 | 9.7  | 9.9  |
| 2022-05-12 9:00 AM  | 10.4 | 10.6 | 10.2 | 10.4 |
| 2022-05-12 10:00 AM | 10.8 | 10.9 | 10.5 | 10.7 |
| 2022-05-12 11:00 AM | 11.4 | 11.5 | 11.0 | 11.3 |
| 2022-05-12 12:00 PM | 13.6 | 13.4 | 12.5 | 13.2 |
| 2022-05-12 1:00 PM  | 15.1 | 15.2 | 14.8 | 15.0 |
| 2022-05-12 2:00 PM  | 17.0 | 17.3 | 17.4 | 17.2 |
| 2022-05-12 3:00 PM  | 17.3 | 18.5 | 18.7 | 18.2 |
| 2022-05-12 4:00 PM  | 16.1 | 16.7 | 16.3 | 16.4 |
| 2022-05-12 5:00 PM  | 14.9 | 15.6 | 15.3 | 15.3 |
| 2022-05-12 6:00 PM  | 15.0 | 15.9 | 15.2 | 15.4 |
| 2022-05-12 7:00 PM  | 14.4 | 15.2 | 14.6 | 14.7 |
| 2022-05-12 8:00 PM  | 13.4 | 14.1 | 13.8 | 13.8 |
| 2022-05-12 9:00 PM  | 11.7 | 11.7 | 11.5 | 11.6 |
| 2022-05-12 10:00 PM | 10.9 | 11.0 | 10.7 | 10.9 |
| 2022-05-12 11:00 PM | 11.0 | 11.3 | 11.0 | 11.1 |
| 2022-05-13 12:00 AM | 11.1 | 11.3 | 11.1 | 11.2 |
| 2022-05-13 1:00 AM  | 10.7 | 10.8 | 10.5 | 10.7 |
| 2022-05-13 2:00 AM  | 10.2 | 10.4 | 9.9  | 10.2 |
| 2022-05-13 3:00 AM  | 11.1 | 11.3 | 11.0 | 11.1 |
| 2022-05-13 4:00 AM  | 10.3 | 10.4 | 10.0 | 10.2 |
| 2022-05-13 5:00 AM  | 10.1 | 10.2 | 9.9  | 10.1 |
| 2022-05-13 6:00 AM  | 10.1 | 10.3 | 10.0 | 10.1 |
| 2022-05-13 7:00 AM  | 9.6  | 9.7  | 9.3  | 9.5  |
| 2022-05-13 8:00 AM  | 9.7  | 9.7  | 9.4  | 9.6  |
| 2022-05-13 9:00 AM  | 10.2 | 10.2 | 9.8  | 10.1 |
| 2022-05-13 10:00 AM | 11.0 | 10.8 | 10.3 | 10.7 |
| 2022-05-13 11:00 AM | 13.2 | 12.1 | 11.6 | 12.3 |

|                     |      |      |      |      |
|---------------------|------|------|------|------|
| 2022-05-13 12:00 PM | 16.0 | 13.5 | 14.9 | 14.8 |
| 2022-05-13 1:00 PM  | 14.8 | 14.5 | 16.7 | 15.3 |
| 2022-05-13 2:00 PM  | 14.9 | 15.6 | 16.9 | 15.8 |
| 2022-05-13 3:00 PM  | 15.2 | 17.2 | 17.6 | 16.7 |
| 2022-05-13 4:00 PM  | 15.9 | 25.0 | 18.5 | 19.8 |
| 2022-05-13 5:00 PM  | 15.7 | 24.6 | 18.0 | 19.4 |
| 2022-05-13 6:00 PM  | 15.2 | 26.5 | 18.0 | 19.9 |
| 2022-05-13 7:00 PM  | 14.1 | 19.8 | 15.8 | 16.6 |
| 2022-05-13 8:00 PM  | 13.1 | 14.6 | 13.9 | 13.9 |
| 2022-05-13 9:00 PM  | 12.5 | 13.4 | 13.3 | 13.1 |
| 2022-05-13 10:00 PM | 10.8 | 11.3 | 11.1 | 11.1 |
| 2022-05-13 11:00 PM | 9.4  | 9.8  | 9.2  | 9.5  |
| 2022-05-14 12:00 AM | 8.9  | 9.2  | 8.8  | 9.0  |
| 2022-05-14 1:00 AM  | 9.3  | 9.5  | 9.1  | 9.3  |
| 2022-05-14 2:00 AM  | 8.9  | 9.3  | 8.7  | 9.0  |
| 2022-05-14 3:00 AM  | 8.9  | 9.2  | 8.6  | 8.9  |
| 2022-05-14 4:00 AM  | 8.8  | 9.2  | 8.5  | 8.8  |
| 2022-05-14 5:00 AM  | 8.5  | 8.8  | 8.2  | 8.5  |
| 2022-05-14 6:00 AM  | 7.9  | 8.2  | 7.5  | 7.9  |
| 2022-05-14 7:00 AM  | 7.2  | 7.4  | 6.7  | 7.1  |
| 2022-05-14 8:00 AM  | 8.5  | 8.6  | 7.6  | 8.2  |
| 2022-05-14 9:00 AM  | 9.6  | 9.5  | 8.8  | 9.3  |
| 2022-05-14 10:00 AM | 11.7 | 11.7 | 11.7 | 11.7 |
| 2022-05-14 11:00 AM | 15.9 | 14.7 | 16.2 | 15.6 |
| 2022-05-14 12:00 PM | 18.2 | 14.8 | 17.5 | 16.8 |
| 2022-05-14 1:00 PM  | 15.5 | 15.5 | 18.8 | 16.6 |
| 2022-05-14 2:00 PM  | 15.7 | 17.0 | 19.3 | 17.3 |
| 2022-05-14 3:00 PM  | 15.4 | 17.9 | 18.8 | 17.4 |
| 2022-05-14 4:00 PM  | 16.6 | 30.8 | 20.8 | 22.7 |
| 2022-05-14 5:00 PM  | 16.6 | 26.8 | 19.8 | 21.1 |
| 2022-05-14 6:00 PM  | 17.8 | 25.3 | 20.8 | 21.3 |
| 2022-05-14 7:00 PM  | 18.1 | 26.8 | 22.5 | 22.5 |
| 2022-05-14 8:00 PM  | 16.9 | 19.8 | 20.0 | 18.9 |
| 2022-05-14 9:00 PM  | 15.4 | 17.2 | 17.5 | 16.7 |
| 2022-05-14 10:00 PM | 13.7 | 14.9 | 14.9 | 14.5 |
| 2022-05-14 11:00 PM | 13.3 | 15.0 | 14.6 | 14.3 |
| 2022-05-15 12:00 AM | 12.3 | 13.9 | 13.3 | 13.2 |
| 2022-05-15 1:00 AM  | 11.3 | 12.3 | 11.7 | 11.8 |
| 2022-05-15 2:00 AM  | 10.4 | 11.2 | 10.5 | 10.7 |
| 2022-05-15 3:00 AM  | 9.6  | 10.4 | 9.5  | 9.8  |
| 2022-05-15 4:00 AM  | 8.7  | 9.3  | 8.4  | 8.8  |
| 2022-05-15 5:00 AM  | 8.6  | 9.0  | 8.2  | 8.6  |
| 2022-05-15 6:00 AM  | 8.5  | 8.5  | 8.1  | 8.4  |

|                     |      |      |      |      |
|---------------------|------|------|------|------|
| 2022-05-15 7:00 AM  | 7.6  | 7.8  | 7.1  | 7.5  |
| 2022-05-15 8:00 AM  | 7.8  | 8.2  | 7.2  | 7.7  |
| 2022-05-15 9:00 AM  | 9.8  | 10.3 | 9.5  | 9.9  |
| 2022-05-15 10:00 AM | 12.8 | 12.7 | 12.5 | 12.7 |
| 2022-05-15 11:00 AM | 14.6 | 14.3 | 14.3 | 14.4 |
| 2022-05-15 12:00 PM | 15.7 | 15.3 | 15.7 | 15.6 |
| 2022-05-15 1:00 PM  | 16.5 | 16.7 | 17.7 | 17.0 |
| 2022-05-15 2:00 PM  | 17.3 | 18.6 | 19.6 | 18.5 |
| 2022-05-15 3:00 PM  | 17.2 | 18.5 | 18.5 | 18.1 |
| 2022-05-15 4:00 PM  | 17.0 | 22.1 | 18.6 | 19.2 |
| 2022-05-15 5:00 PM  | 17.3 | 22.0 | 19.1 | 19.5 |
| 2022-05-15 6:00 PM  | 17.1 | 18.7 | 18.0 | 17.9 |
| 2022-05-15 7:00 PM  | 15.8 | 16.8 | 16.8 | 16.5 |
| 2022-05-15 8:00 PM  | 14.9 | 15.6 | 15.5 | 15.3 |
| 2022-05-15 9:00 PM  | 13.7 | 15.0 | 14.4 | 14.4 |
| 2022-05-15 10:00 PM | 13.1 | 14.1 | 13.9 | 13.7 |
| 2022-05-15 11:00 PM | 12.0 | 12.6 | 12.3 | 12.3 |
| 2022-05-16 12:00 AM | 11.2 | 12.0 | 11.4 | 11.5 |
| 2022-05-16 1:00 AM  | 11.0 | 11.9 | 11.4 | 11.4 |
| 2022-05-16 2:00 AM  | 10.4 | 10.9 | 10.5 | 10.6 |
| 2022-05-16 3:00 AM  | 9.4  | 9.6  | 9.3  | 9.4  |
| 2022-05-16 4:00 AM  | 8.7  | 8.8  | 8.5  | 8.7  |
| 2022-05-16 5:00 AM  | 8.3  | 8.5  | 8.0  | 8.3  |
| 2022-05-16 6:00 AM  | 8.0  | 8.3  | 7.4  | 7.9  |
| 2022-05-16 7:00 AM  | 8.1  | 8.2  | 7.5  | 7.9  |
| 2022-05-16 8:00 AM  | 8.8  | 8.6  | 8.1  | 8.5  |
| 2022-05-16 9:00 AM  | 10.0 | 9.2  | 8.8  | 9.3  |
| 2022-05-16 10:00 AM | 11.0 | 9.8  | 9.5  | 10.1 |
| 2022-05-16 11:00 AM | 11.4 | 9.7  | 8.8  | 10.0 |
| 2022-05-16 12:00 PM | 13.1 | 11.5 | 11.0 | 11.9 |
| 2022-05-16 1:00 PM  | 13.3 | 13.1 | 13.2 | 13.2 |
| 2022-05-16 2:00 PM  | 13.6 | 14.7 | 15.4 | 14.6 |
| 2022-05-16 3:00 PM  | 14.8 | 15.9 | 15.5 | 15.4 |
| 2022-05-16 4:00 PM  | 15.3 | 23.2 | 17.5 | 18.7 |
| 2022-05-16 5:00 PM  | 14.8 | 18.0 | 16.0 | 16.3 |
| 2022-05-16 6:00 PM  | 14.5 | 15.5 | 14.7 | 14.9 |
| 2022-05-16 7:00 PM  | 12.9 | 14.1 | 13.3 | 13.4 |
| 2022-05-16 8:00 PM  | 11.9 | 12.7 | 12.3 | 12.3 |
| 2022-05-16 9:00 PM  | 11.0 | 11.4 | 11.2 | 11.2 |
| 2022-05-16 10:00 PM | 9.2  | 9.7  | 9.4  | 9.4  |
| 2022-05-16 11:00 PM | 9.4  | 9.6  | 9.3  | 9.4  |
| 2022-05-17 12:00 AM | 8.2  | 8.5  | 8.1  | 8.3  |
| 2022-05-17 1:00 AM  | 7.3  | 7.6  | 6.9  | 7.3  |

|                     |      |      |      |      |
|---------------------|------|------|------|------|
| 2022-05-17 2:00 AM  | 7.0  | 7.2  | 6.6  | 6.9  |
| 2022-05-17 3:00 AM  | 5.9  | 5.9  | 5.2  | 5.7  |
| 2022-05-17 4:00 AM  | 5.7  | 5.9  | 5.0  | 5.5  |
| 2022-05-17 5:00 AM  | 5.1  | 5.3  | 4.4  | 4.9  |
| 2022-05-17 6:00 AM  | 4.2  | 4.1  | 3.6  | 4.0  |
| 2022-05-17 7:00 AM  | 3.7  | 3.2  | 2.8  | 3.2  |
| 2022-05-17 8:00 AM  | 4.2  | 4.0  | 3.3  | 3.8  |
| 2022-05-17 9:00 AM  | 5.8  | 6.0  | 5.1  | 5.6  |
| 2022-05-17 10:00 AM | 7.7  | 7.4  | 6.9  | 7.3  |
| 2022-05-17 11:00 AM | 11.0 | 9.0  | 9.5  | 9.8  |
| 2022-05-17 12:00 PM | 14.0 | 10.3 | 12.4 | 12.2 |
| 2022-05-17 1:00 PM  | 11.6 | 11.2 | 13.3 | 12.0 |
| 2022-05-17 2:00 PM  | 11.8 | 12.4 | 13.7 | 12.6 |
| 2022-05-17 3:00 PM  | 12.4 | 14.5 | 14.7 | 13.9 |
| 2022-05-17 4:00 PM  | 13.5 | 26.6 | 15.8 | 18.6 |
| 2022-05-17 5:00 PM  | 13.0 | 23.2 | 14.8 | 17.0 |
| 2022-05-17 6:00 PM  | 12.5 | 22.0 | 14.1 | 16.2 |
| 2022-05-17 7:00 PM  | 11.9 | 15.5 | 12.7 | 13.4 |
| 2022-05-17 8:00 PM  | 11.2 | 12.3 | 11.8 | 11.8 |
| 2022-05-17 9:00 PM  | 9.9  | 10.5 | 10.3 | 10.2 |
| 2022-05-17 10:00 PM | 7.9  | 8.3  | 7.7  | 8.0  |
| 2022-05-17 11:00 PM | 6.8  | 7.1  | 6.5  | 6.8  |
| 2022-05-18 12:00 AM | 5.9  | 6.1  | 5.5  | 5.8  |
| 2022-05-18 1:00 AM  | 5.4  | 5.3  | 5.0  | 5.2  |
| 2022-05-18 2:00 AM  | 5.5  | 5.3  | 5.1  | 5.3  |
| 2022-05-18 3:00 AM  | 6.2  | 5.8  | 5.6  | 5.9  |
| 2022-05-18 4:00 AM  | 6.7  | 6.7  | 5.9  | 6.4  |
| 2022-05-18 5:00 AM  | 6.5  | 6.4  | 5.9  | 6.3  |
| 2022-05-18 6:00 AM  | 6.5  | 6.4  | 6.0  | 6.3  |
| 2022-05-18 7:00 AM  | 6.7  | 6.7  | 6.3  | 6.6  |
| 2022-05-18 8:00 AM  | 7.1  | 7.1  | 6.6  | 6.9  |
| 2022-05-18 9:00 AM  | 7.4  | 7.3  | 6.5  | 7.1  |
| 2022-05-18 10:00 AM | 9.2  | 8.2  | 7.5  | 8.3  |
| 2022-05-18 11:00 AM | 9.4  | 8.7  | 7.9  | 8.7  |
| 2022-05-18 12:00 PM | 9.6  | 9.1  | 8.5  | 9.1  |
| 2022-05-18 1:00 PM  | 8.7  | 8.3  | 8.2  | 8.4  |
| 2022-05-18 2:00 PM  | 10.1 | 9.5  | 10.0 | 9.9  |
| 2022-05-18 3:00 PM  | 9.3  | 9.0  | 9.0  | 9.1  |
| 2022-05-18 4:00 PM  | 8.3  | 7.7  | 7.4  | 7.8  |
| 2022-05-18 5:00 PM  | 8.0  | 7.6  | 7.0  | 7.5  |
| 2022-05-18 6:00 PM  | 7.0  | 6.6  | 5.9  | 6.5  |
| 2022-05-18 7:00 PM  | 7.5  | 7.7  | 6.4  | 7.2  |
| 2022-05-18 8:00 PM  | 6.7  | 6.3  | 5.3  | 6.1  |



|                     |      |      |      |      |
|---------------------|------|------|------|------|
| 2022-05-18 9:00 PM  | 6.3  | 5.9  | 5.1  | 5.8  |
| 2022-05-18 10:00 PM | 6.3  | 6.1  | 5.2  | 5.9  |
| 2022-05-18 11:00 PM | 6.0  | 5.8  | 4.9  | 5.6  |
| 2022-05-19 12:00 AM | 5.9  | 5.7  | 4.9  | 5.5  |
| 2022-05-19 1:00 AM  | 6.0  | 5.8  | 5.0  | 5.6  |
| 2022-05-19 2:00 AM  | 6.1  | 5.9  | 4.9  | 5.6  |
| 2022-05-19 3:00 AM  | 6.1  | 5.9  | 4.9  | 5.6  |
| 2022-05-19 4:00 AM  | 6.0  | 5.9  | 5.0  | 5.6  |
| 2022-05-19 5:00 AM  | 6.2  | 6.2  | 5.3  | 5.9  |
| 2022-05-19 6:00 AM  | 6.2  | 6.2  | 5.3  | 5.9  |
| 2022-05-19 7:00 AM  | 6.5  | 6.4  | 5.7  | 6.2  |
| 2022-05-19 8:00 AM  | 7.0  | 6.9  | 6.3  | 6.7  |
| 2022-05-19 9:00 AM  | 7.6  | 7.6  | 7.0  | 7.4  |
| 2022-05-19 10:00 AM | 8.7  | 8.5  | 8.1  | 8.4  |
| 2022-05-19 11:00 AM | 11.2 | 10.4 | 10.7 | 10.8 |
| 2022-05-19 12:00 PM | 12.7 | 11.7 | 12.5 | 12.3 |
| 2022-05-19 1:00 PM  | 13.1 | 12.7 | 14.1 | 13.3 |
| 2022-05-19 2:00 PM  | 12.8 | 12.4 | 13.1 | 12.8 |
| 2022-05-19 3:00 PM  | 13.5 | 13.7 | 14.4 | 13.9 |
| 2022-05-19 4:00 PM  | 13.0 | 13.4 | 13.6 | 13.3 |
| 2022-05-19 5:00 PM  | 12.9 | 14.4 | 13.7 | 13.7 |
| 2022-05-19 6:00 PM  | 12.2 | 12.9 | 12.4 | 12.5 |
| 2022-05-19 7:00 PM  | 11.9 | 12.1 | 12.1 | 12.0 |
| 2022-05-19 8:00 PM  | 10.4 | 11.2 | 10.7 | 10.8 |
| 2022-05-19 9:00 PM  | 8.9  | 9.1  | 8.6  | 8.9  |
| 2022-05-19 10:00 PM | 7.8  | 7.9  | 7.0  | 7.6  |
| 2022-05-19 11:00 PM | 7.9  | 7.8  | 7.0  | 7.6  |
| 2022-05-20 12:00 AM | 7.5  | 7.4  | 6.7  | 7.2  |
| 2022-05-20 1:00 AM  | 6.9  | 6.8  | 6.1  | 6.6  |
| 2022-05-20 2:00 AM  | 6.4  | 6.4  | 5.6  | 6.1  |
| 2022-05-20 3:00 AM  | 6.4  | 6.3  | 5.6  | 6.1  |
| 2022-05-20 4:00 AM  | 6.9  | 6.6  | 6.1  | 6.5  |
| 2022-05-20 5:00 AM  | 7.1  | 7.0  | 6.5  | 6.9  |
| 2022-05-20 6:00 AM  | 7.3  | 7.3  | 6.7  | 7.1  |
| 2022-05-20 7:00 AM  | 6.8  | 6.9  | 6.2  | 6.6  |
| 2022-05-20 8:00 AM  | 6.5  | 6.5  | 5.7  | 6.2  |
| 2022-05-20 9:00 AM  | 7.1  | 7.1  | 6.2  | 6.8  |
| 2022-05-20 10:00 AM | 7.8  | 7.8  | 7.1  | 7.6  |
| 2022-05-20 11:00 AM | 8.2  | 8.2  | 7.6  | 8.0  |
| 2022-05-20 12:00 PM | 9.4  | 9.3  | 9.5  | 9.4  |
| 2022-05-20 1:00 PM  | 12.8 | 12.8 | 17.7 | 14.4 |
| 2022-05-20 2:00 PM  | 13.3 | 14.3 | 18.3 | 15.3 |
| 2022-05-20 3:00 PM  | 14.2 | 15.9 | 21.9 | 17.3 |

|                     |      |      |      |      |
|---------------------|------|------|------|------|
| 2022-05-20 4:00 PM  | 15.1 | 22.7 | 25.1 | 21.0 |
| 2022-05-20 5:00 PM  | 15.0 | 19.1 | 19.4 | 17.8 |
| 2022-05-20 6:00 PM  | 14.8 | 20.0 | 18.9 | 17.9 |
| 2022-05-20 7:00 PM  | 14.2 | 18.3 | 17.1 | 16.5 |
| 2022-05-20 8:00 PM  | 13.5 | 15.4 | 15.5 | 14.8 |
| 2022-05-20 9:00 PM  | 12.7 | 13.9 | 13.5 | 13.4 |
| 2022-05-20 10:00 PM | 11.1 | 11.3 | 11.1 | 11.2 |
| 2022-05-20 11:00 PM | 9.0  | 8.5  | 8.3  | 8.6  |
| 2022-05-21 12:00 AM | 7.7  | 7.0  | 6.8  | 7.2  |
| 2022-05-21 1:00 AM  | 7.0  | 6.2  | 6.1  | 6.4  |
| 2022-05-21 2:00 AM  | 6.6  | 5.6  | 5.5  | 5.9  |
| 2022-05-21 3:00 AM  | 6.1  | 5.2  | 5.1  | 5.5  |
| 2022-05-21 4:00 AM  | 5.6  | 4.8  | 4.5  | 5.0  |
| 2022-05-21 5:00 AM  | 5.0  | 4.6  | 3.8  | 4.5  |
| 2022-05-21 6:00 AM  | 4.0  | 4.3  | 2.8  | 3.7  |
| 2022-05-21 7:00 AM  | 3.4  | 3.9  | 2.1  | 3.1  |
| 2022-05-21 8:00 AM  | 4.3  | 4.6  | 3.1  | 4.0  |
| 2022-05-21 9:00 AM  | 6.6  | 5.9  | 5.6  | 6.0  |
| 2022-05-21 10:00 AM | 8.0  | 7.2  | 7.5  | 7.6  |
| 2022-05-21 11:00 AM | 9.0  | 8.1  | 8.8  | 8.6  |
| 2022-05-21 12:00 PM | 9.6  | 8.8  | 11.0 | 9.8  |
| 2022-05-21 1:00 PM  | 11.3 | 10.7 | 14.9 | 12.3 |
| 2022-05-21 2:00 PM  | 10.8 | 10.6 | 11.7 | 11.0 |
| 2022-05-21 3:00 PM  | 10.3 | 10.5 | 11.0 | 10.6 |
| 2022-05-21 4:00 PM  | 11.1 | 11.4 | 12.3 | 11.6 |
| 2022-05-21 5:00 PM  | 11.9 | 13.6 | 14.3 | 13.3 |
| 2022-05-21 6:00 PM  | 11.4 | 12.6 | 13.3 | 12.4 |
| 2022-05-21 7:00 PM  | 9.9  | 10.0 | 10.1 | 10.0 |
| 2022-05-21 8:00 PM  | 8.8  | 8.9  | 8.5  | 8.7  |
| 2022-05-21 9:00 PM  | 8.3  | 8.5  | 8.1  | 8.3  |
| 2022-05-21 10:00 PM | 7.9  | 7.9  | 7.4  | 7.7  |
| 2022-05-21 11:00 PM | 7.4  | 7.5  | 6.8  | 7.2  |
| 2022-05-22 12:00 AM | 7.1  | 7.2  | 6.5  | 6.9  |
| 2022-05-22 1:00 AM  | 6.9  | 7.0  | 6.1  | 6.7  |
| 2022-05-22 2:00 AM  | 6.5  | 6.4  | 5.5  | 6.1  |
| 2022-05-22 3:00 AM  | 5.7  | 5.8  | 4.9  | 5.5  |
| 2022-05-22 4:00 AM  | 5.4  | 5.4  | 4.5  | 5.1  |
| 2022-05-22 5:00 AM  | 5.2  | 5.3  | 4.3  | 4.9  |
| 2022-05-22 6:00 AM  | 5.4  | 5.2  | 4.6  | 5.1  |
| 2022-05-22 7:00 AM  | 5.5  | 5.5  | 4.7  | 5.2  |
| 2022-05-22 8:00 AM  | 5.9  | 5.8  | 5.0  | 5.6  |
| 2022-05-22 9:00 AM  | 6.9  | 6.8  | 6.4  | 6.7  |
| 2022-05-22 10:00 AM | 8.9  | 8.0  | 8.6  | 8.5  |

|                     |      |      |      |      |
|---------------------|------|------|------|------|
| 2022-05-22 11:00 AM | 9.6  | 8.8  | 9.6  | 9.3  |
| 2022-05-22 12:00 PM | 10.7 | 9.1  | 14.1 | 11.3 |
| 2022-05-22 1:00 PM  | 10.2 | 10.3 | 14.9 | 11.8 |
| 2022-05-22 2:00 PM  | 11.1 | 11.6 | 15.4 | 12.7 |
| 2022-05-22 3:00 PM  | 11.8 | 13.2 | 18.8 | 14.6 |
| 2022-05-22 4:00 PM  | 10.8 | 11.5 | 13.2 | 11.8 |
| 2022-05-22 5:00 PM  | 11.4 | 12.9 | 14.1 | 12.8 |
| 2022-05-22 6:00 PM  | 11.1 | 16.1 | 15.1 | 14.1 |
| 2022-05-22 7:00 PM  | 10.3 | 12.5 | 12.3 | 11.7 |
| 2022-05-22 8:00 PM  | 9.2  | 10.6 | 10.0 | 9.9  |
| 2022-05-22 9:00 PM  | 8.8  | 9.5  | 9.2  | 9.2  |
| 2022-05-22 10:00 PM | 7.4  | 8.1  | 6.9  | 7.5  |
| 2022-05-22 11:00 PM | 6.4  | 6.6  | 5.4  | 6.1  |
| 2022-05-23 12:00 AM | 5.7  | 5.6  | 4.6  | 5.3  |
| 2022-05-23 1:00 AM  | 5.1  | 4.9  | 3.9  | 4.6  |
| 2022-05-23 2:00 AM  | 4.3  | 4.3  | 3.0  | 3.9  |
| 2022-05-23 3:00 AM  | 3.7  | 4.0  | 2.4  | 3.4  |
| 2022-05-23 4:00 AM  | 3.3  | 3.4  | 2.0  | 2.9  |
| 2022-05-23 5:00 AM  | 2.8  | 2.8  | 1.7  | 2.4  |
| 2022-05-23 6:00 AM  | 2.8  | 3.0  | 1.5  | 2.4  |
| 2022-05-23 7:00 AM  | 2.8  | 2.7  | 1.5  | 2.3  |
| 2022-05-23 8:00 AM  | 3.7  | 3.5  | 2.7  | 3.3  |
| 2022-05-23 9:00 AM  | 5.5  | 5.7  | 4.8  | 5.3  |
| 2022-05-23 10:00 AM | 8.0  | 7.7  | 8.1  | 7.9  |
| 2022-05-23 11:00 AM | 11.1 | 9.7  | 11.3 | 10.7 |
| 2022-05-23 12:00 PM | 13.3 | 11.0 | 18.2 | 14.2 |
| 2022-05-23 1:00 PM  | 13.1 | 13.0 | 17.5 | 14.5 |
| 2022-05-23 2:00 PM  | 12.5 | 13.7 | 18.1 | 14.8 |
| 2022-05-23 3:00 PM  | 13.4 | 16.1 | 22.4 | 17.3 |
| 2022-05-23 4:00 PM  | 14.0 | 24.1 | 22.3 | 20.1 |
| 2022-05-23 5:00 PM  | 14.1 | 24.1 | 19.6 | 19.3 |
| 2022-05-23 6:00 PM  | 13.2 | 19.5 | 16.6 | 16.4 |
| 2022-05-23 7:00 PM  | 12.8 | 16.0 | 14.9 | 14.6 |
| 2022-05-23 8:00 PM  | 12.0 | 13.4 | 13.2 | 12.9 |
| 2022-05-23 9:00 PM  | 11.0 | 12.0 | 11.9 | 11.6 |
| 2022-05-23 10:00 PM | 9.9  | 10.6 | 10.2 | 10.2 |
| 2022-05-23 11:00 PM | 8.7  | 9.2  | 8.2  | 8.7  |
| 2022-05-24 12:00 AM | 7.7  | 8.0  | 6.7  | 7.5  |
| 2022-05-24 1:00 AM  | 6.8  | 6.9  | 5.6  | 6.4  |
| 2022-05-24 2:00 AM  | 6.2  | 6.4  | 5.0  | 5.9  |
| 2022-05-24 3:00 AM  | 5.6  | 5.8  | 4.4  | 5.3  |
| 2022-05-24 4:00 AM  | 5.0  | 5.1  | 3.7  | 4.6  |
| 2022-05-24 5:00 AM  | 4.6  | 4.2  | 3.4  | 4.1  |

|                     |      |      |      |      |
|---------------------|------|------|------|------|
| 2022-05-24 6:00 AM  | 4.2  | 3.9  | 3.1  | 3.7  |
| 2022-05-24 7:00 AM  | 4.9  | 4.6  | 3.8  | 4.4  |
| 2022-05-24 8:00 AM  | 5.8  | 5.9  | 4.8  | 5.5  |
| 2022-05-24 9:00 AM  | 8.3  | 8.0  | 7.7  | 8.0  |
| 2022-05-24 10:00 AM | 9.9  | 9.4  | 9.7  | 9.7  |
| 2022-05-24 11:00 AM | 12.0 | 10.8 | 12.2 | 11.7 |
| 2022-05-24 12:00 PM | 14.6 | 12.1 | 20.6 | 15.8 |
| 2022-05-24 1:00 PM  | 14.1 | 14.1 | 27.4 | 18.5 |
| 2022-05-24 2:00 PM  | 14.4 | 15.4 | 21.5 | 17.1 |
| 2022-05-24 3:00 PM  | 15.6 | 17.5 | 21.0 | 18.0 |
| 2022-05-24 4:00 PM  | 16.4 | 22.5 | 21.3 | 20.1 |
| 2022-05-24 5:00 PM  | 16.4 | 20.4 | 19.4 | 18.7 |
| 2022-05-24 6:00 PM  | 16.0 | 20.9 | 19.4 | 18.8 |
| 2022-05-24 7:00 PM  | 16.2 | 20.2 | 19.6 | 18.7 |
| 2022-05-24 8:00 PM  | 15.1 | 16.7 | 17.2 | 16.3 |
| 2022-05-24 9:00 PM  | 13.9 | 14.9 | 15.3 | 14.7 |
| 2022-05-24 10:00 PM | 12.6 | 13.0 | 12.9 | 12.8 |
| 2022-05-24 11:00 PM | 10.9 | 11.3 | 10.3 | 10.8 |
| 2022-05-25 12:00 AM | 10.0 | 10.4 | 9.1  | 9.8  |
| 2022-05-25 1:00 AM  | 9.4  | 9.7  | 8.4  | 9.2  |
| 2022-05-25 2:00 AM  | 9.0  | 9.3  | 7.9  | 8.7  |
| 2022-05-25 3:00 AM  | 8.6  | 8.9  | 7.4  | 8.3  |
| 2022-05-25 4:00 AM  | 8.3  | 8.4  | 7.0  | 7.9  |
| 2022-05-25 5:00 AM  | 8.0  | 8.2  | 6.6  | 7.6  |
| 2022-05-25 6:00 AM  | 7.8  | 8.0  | 6.6  | 7.5  |
| 2022-05-25 7:00 AM  | 8.0  | 8.3  | 6.7  | 7.7  |
| 2022-05-25 8:00 AM  | 8.7  | 8.8  | 7.7  | 8.4  |
| 2022-05-25 9:00 AM  | 9.3  | 9.2  | 8.4  | 9.0  |
| 2022-05-25 10:00 AM | 9.7  | 9.7  | 9.2  | 9.5  |
| 2022-05-25 11:00 AM | 9.9  | 9.8  | 9.4  | 9.7  |
| 2022-05-25 12:00 PM | 10.0 | 10.1 | 9.8  | 10.0 |
| 2022-05-25 1:00 PM  | 10.7 | 10.8 | 10.7 | 10.7 |
| 2022-05-25 2:00 PM  | 11.7 | 11.8 | 12.1 | 11.9 |
| 2022-05-25 3:00 PM  | 11.9 | 12.1 | 12.3 | 12.1 |
| 2022-05-25 4:00 PM  | 11.2 | 11.1 | 11.1 | 11.1 |
| 2022-05-25 5:00 PM  | 10.4 | 10.2 | 9.9  | 10.2 |
| 2022-05-25 6:00 PM  | 9.9  | 9.7  | 9.3  | 9.6  |
| 2022-05-25 7:00 PM  | 9.9  | 9.7  | 9.4  | 9.7  |
| 2022-05-25 8:00 PM  | 9.6  | 9.5  | 9.2  | 9.4  |
| 2022-05-25 9:00 PM  | 9.4  | 9.3  | 8.9  | 9.2  |
| 2022-05-25 10:00 PM | 9.2  | 9.1  | 8.7  | 9.0  |
| 2022-05-25 11:00 PM | 9.1  | 9.0  | 8.6  | 8.9  |
| 2022-05-26 12:00 AM | 9.1  | 9.0  | 8.7  | 8.9  |

|                     |      |      |      |      |
|---------------------|------|------|------|------|
| 2022-05-26 1:00 AM  | 9.3  | 9.3  | 8.9  | 9.2  |
| 2022-05-26 2:00 AM  | 9.3  | 9.3  | 9.0  | 9.2  |
| 2022-05-26 3:00 AM  | 9.3  | 9.3  | 9.0  | 9.2  |
| 2022-05-26 4:00 AM  | 9.3  | 9.3  | 8.9  | 9.2  |
| 2022-05-26 5:00 AM  | 9.3  | 9.3  | 8.9  | 9.2  |
| 2022-05-26 6:00 AM  | 9.2  | 9.2  | 8.9  | 9.1  |
| 2022-05-26 7:00 AM  | 9.2  | 9.2  | 8.9  | 9.1  |
| 2022-05-26 8:00 AM  | 9.4  | 9.4  | 9.1  | 9.3  |
| 2022-05-26 9:00 AM  | 9.9  | 9.9  | 9.7  | 9.8  |
| 2022-05-26 10:00 AM | 11.0 | 10.8 | 11.0 | 10.9 |
| 2022-05-26 11:00 AM | 12.3 | 12.0 | 12.7 | 12.3 |
| 2022-05-26 12:00 PM | 12.8 | 12.3 | 13.1 | 12.7 |
| 2022-05-26 1:00 PM  | 12.5 | 12.4 | 13.0 | 12.6 |
| 2022-05-26 2:00 PM  | 12.8 | 13.0 | 13.7 | 13.2 |
| 2022-05-26 3:00 PM  | 13.5 | 13.6 | 14.6 | 13.9 |
| 2022-05-26 4:00 PM  | 14.2 | 15.5 | 16.3 | 15.3 |
| 2022-05-26 5:00 PM  | 13.7 | 14.3 | 15.3 | 14.4 |
| 2022-05-26 6:00 PM  | 13.1 | 14.1 | 14.5 | 13.9 |
| 2022-05-26 7:00 PM  | 13.1 | 14.0 | 14.3 | 13.8 |
| 2022-05-26 8:00 PM  | 12.8 | 13.4 | 13.9 | 13.4 |
| 2022-05-26 9:00 PM  | 12.3 | 13.0 | 13.1 | 12.8 |
| 2022-05-26 10:00 PM | 11.8 | 12.2 | 12.2 | 12.1 |
| 2022-05-26 11:00 PM | 11.6 | 11.7 | 11.5 | 11.6 |
| 2022-05-27 12:00 AM | 11.4 | 11.5 | 11.3 | 11.4 |
| 2022-05-27 1:00 AM  | 11.2 | 11.3 | 10.9 | 11.1 |
| 2022-05-27 2:00 AM  | 11.0 | 11.1 | 10.6 | 10.9 |
| 2022-05-27 3:00 AM  | 10.9 | 11.0 | 10.5 | 10.8 |
| 2022-05-27 4:00 AM  | 10.6 | 10.7 | 10.0 | 10.4 |
| 2022-05-27 5:00 AM  | 10.4 | 10.5 | 9.7  | 10.2 |
| 2022-05-27 6:00 AM  | 10.4 | 10.5 | 9.7  | 10.2 |
| 2022-05-27 7:00 AM  | 10.5 | 10.5 | 9.9  | 10.3 |
| 2022-05-27 8:00 AM  | 10.8 | 10.6 | 10.3 | 10.6 |
| 2022-05-27 9:00 AM  | 10.6 | 10.6 | 9.9  | 10.4 |
| 2022-05-27 10:00 AM | 12.6 | 11.8 | 12.3 | 12.2 |
| 2022-05-27 11:00 AM | 15.5 | 14.1 | 16.6 | 15.4 |
| 2022-05-27 12:00 PM | 16.2 | 14.8 | 19.0 | 16.7 |
| 2022-05-27 1:00 PM  | 16.2 | 15.7 | 19.7 | 17.2 |
| 2022-05-27 2:00 PM  | 16.1 | 16.7 | 22.1 | 18.3 |
| 2022-05-27 3:00 PM  | 16.7 | 18.5 | 24.6 | 19.9 |
| 2022-05-27 4:00 PM  | 17.4 | 30.2 | 27.9 | 25.2 |
| 2022-05-27 5:00 PM  | 17.1 | 26.3 | 23.5 | 22.3 |
| 2022-05-27 6:00 PM  | 16.1 | 21.9 | 21.1 | 19.7 |
| 2022-05-27 7:00 PM  | 15.7 | 20.7 | 20.8 | 19.1 |

|                     |      |      |      |      |
|---------------------|------|------|------|------|
| 2022-05-27 8:00 PM  | 14.6 | 15.8 | 16.2 | 15.5 |
| 2022-05-27 9:00 PM  | 13.9 | 14.6 | 14.6 | 14.4 |
| 2022-05-27 10:00 PM | 12.4 | 13.0 | 12.2 | 12.5 |
| 2022-05-27 11:00 PM | 11.7 | 12.1 | 11.2 | 11.7 |
| 2022-05-28 12:00 AM | 11.5 | 11.7 | 10.9 | 11.4 |
| 2022-05-28 1:00 AM  | 10.8 | 11.0 | 9.9  | 10.6 |
| 2022-05-28 2:00 AM  | 10.2 | 10.6 | 9.0  | 9.9  |
| 2022-05-28 3:00 AM  | 9.6  | 10.0 | 8.3  | 9.3  |
| 2022-05-28 4:00 AM  | 9.4  | 9.8  | 8.1  | 9.1  |
| 2022-05-28 5:00 AM  | 9.4  | 9.6  | 8.2  | 9.1  |
| 2022-05-28 6:00 AM  | 9.5  | 9.7  | 8.4  | 9.2  |
| 2022-05-28 7:00 AM  | 9.8  | 10.0 | 8.8  | 9.5  |
| 2022-05-28 8:00 AM  | 10.6 | 10.6 | 9.6  | 10.3 |
| 2022-05-28 9:00 AM  | 10.5 | 10.5 | 9.7  | 10.2 |
| 2022-05-28 10:00 AM | 10.6 | 10.6 | 9.8  | 10.3 |
| 2022-05-28 11:00 AM | 10.8 | 10.8 | 10.2 | 10.6 |
| 2022-05-28 12:00 PM | 11.3 | 11.4 | 11.2 | 11.3 |
| 2022-05-28 1:00 PM  | 11.5 | 11.6 | 11.5 | 11.5 |
| 2022-05-28 2:00 PM  | 12.0 | 12.1 | 12.3 | 12.1 |
| 2022-05-28 3:00 PM  | 11.9 | 11.8 | 12.0 | 11.9 |
| 2022-05-28 4:00 PM  | 11.4 | 11.4 | 11.2 | 11.3 |
| 2022-05-28 5:00 PM  | 11.0 | 11.0 | 10.6 | 10.9 |
| 2022-05-28 6:00 PM  | 11.1 | 11.0 | 10.8 | 11.0 |
| 2022-05-28 7:00 PM  | 11.3 | 11.3 | 11.1 | 11.2 |
| 2022-05-28 8:00 PM  | 11.1 | 11.0 | 10.7 | 10.9 |
| 2022-05-28 9:00 PM  | 10.8 | 10.7 | 10.3 | 10.6 |
| 2022-05-28 10:00 PM | 10.6 | 10.6 | 10.0 | 10.4 |
| 2022-05-28 11:00 PM | 10.5 | 10.4 | 9.9  | 10.3 |
| 2022-05-29 12:00 AM | 10.5 | 10.5 | 10.0 | 10.3 |
| 2022-05-29 1:00 AM  | 10.5 | 10.6 | 10.1 | 10.4 |
| 2022-05-29 2:00 AM  | 10.4 | 10.4 | 9.9  | 10.2 |
| 2022-05-29 3:00 AM  | 10.0 | 10.0 | 9.4  | 9.8  |
| 2022-05-29 4:00 AM  | 9.5  | 9.5  | 8.8  | 9.3  |
| 2022-05-29 5:00 AM  | 9.2  | 9.2  | 8.4  | 8.9  |
| 2022-05-29 6:00 AM  | 9.1  | 9.1  | 8.3  | 8.8  |
| 2022-05-29 7:00 AM  | 9.2  | 9.2  | 8.5  | 9.0  |
| 2022-05-29 8:00 AM  | 9.4  | 9.4  | 8.7  | 9.2  |
| 2022-05-29 9:00 AM  | 10.0 | 9.8  | 9.4  | 9.7  |
| 2022-05-29 10:00 AM | 11.5 | 10.8 | 11.0 | 11.1 |
| 2022-05-29 11:00 AM | 12.6 | 11.2 | 12.4 | 12.1 |
| 2022-05-29 12:00 PM | 14.1 | 12.0 | 15.7 | 13.9 |
| 2022-05-29 1:00 PM  | 13.8 | 12.9 | 16.1 | 14.3 |
| 2022-05-29 2:00 PM  | 13.7 | 13.3 | 15.4 | 14.1 |

|                     |      |      |      |      |
|---------------------|------|------|------|------|
| 2022-05-29 3:00 PM  | 13.5 | 13.5 | 15.5 | 14.2 |
| 2022-05-29 4:00 PM  | 13.1 | 12.9 | 14.0 | 13.3 |
| 2022-05-29 5:00 PM  | 12.1 | 11.7 | 12.1 | 12.0 |
| 2022-05-29 6:00 PM  | 12.5 | 13.6 | 14.0 | 13.4 |
| 2022-05-29 7:00 PM  | 13.0 | 14.4 | 15.1 | 14.2 |
| 2022-05-29 8:00 PM  | 12.5 | 12.7 | 13.2 | 12.8 |
| 2022-05-29 9:00 PM  | 12.0 | 12.0 | 12.2 | 12.1 |
| 2022-05-29 10:00 PM | 11.5 | 11.6 | 11.4 | 11.5 |
| 2022-05-29 11:00 PM | 11.6 | 11.6 | 11.5 | 11.6 |
| 2022-05-30 12:00 AM | 11.5 | 11.5 | 11.4 | 11.5 |
| 2022-05-30 1:00 AM  | 11.3 | 11.3 | 11.0 | 11.2 |
| 2022-05-30 2:00 AM  | 11.2 | 11.1 | 10.9 | 11.1 |
| 2022-05-30 3:00 AM  | 11.1 | 11.1 | 10.8 | 11.0 |
| 2022-05-30 4:00 AM  | 10.8 | 10.8 | 10.1 | 10.6 |
| 2022-05-30 5:00 AM  | 10.7 | 10.7 | 9.9  | 10.4 |
| 2022-05-30 6:00 AM  | 10.6 | 10.7 | 9.8  | 10.4 |
| 2022-05-30 7:00 AM  | 10.7 | 10.7 | 9.9  | 10.4 |
| 2022-05-30 8:00 AM  | 11.2 | 11.1 | 10.7 | 11.0 |
| 2022-05-30 9:00 AM  | 11.0 | 10.9 | 10.6 | 10.8 |
| 2022-05-30 10:00 AM | 10.7 | 10.7 | 10.2 | 10.5 |
| 2022-05-30 11:00 AM | 11.8 | 12.1 | 12.1 | 12.0 |
| 2022-05-30 12:00 PM | 12.0 | 12.0 | 12.3 | 12.1 |
| 2022-05-30 1:00 PM  | 13.0 | 12.9 | 14.3 | 13.4 |
| 2022-05-30 2:00 PM  | 11.9 | 11.9 | 11.8 | 11.9 |
| 2022-05-30 3:00 PM  | 12.3 | 12.3 | 12.9 | 12.5 |
| 2022-05-30 4:00 PM  | 13.9 | 14.3 | 16.2 | 14.8 |
| 2022-05-30 5:00 PM  | 14.3 | 16.9 | 18.7 | 16.6 |
| 2022-05-30 6:00 PM  | 14.6 | 17.7 | 19.1 | 17.1 |
| 2022-05-30 7:00 PM  | 14.2 | 15.5 | 16.9 | 15.5 |
| 2022-05-30 8:00 PM  | 14.0 | 14.6 | 15.7 | 14.8 |
| 2022-05-30 9:00 PM  | 13.8 | 14.1 | 14.8 | 14.2 |
| 2022-05-30 10:00 PM | 13.0 | 13.2 | 13.4 | 13.2 |
| 2022-05-30 11:00 PM | 12.3 | 12.4 | 12.2 | 12.3 |
| 2022-05-31 12:00 AM | 12.2 | 12.3 | 12.0 | 12.2 |
| 2022-05-31 1:00 AM  | 12.1 | 12.2 | 11.8 | 12.0 |
| 2022-05-31 2:00 AM  | 11.7 | 11.8 | 11.2 | 11.6 |
| 2022-05-31 3:00 AM  | 11.3 | 11.5 | 10.5 | 11.1 |
| 2022-05-31 4:00 AM  | 11.1 | 11.2 | 10.2 | 10.8 |
| 2022-05-31 5:00 AM  | 10.8 | 11.0 | 9.7  | 10.5 |
| 2022-05-31 6:00 AM  | 10.8 | 10.9 | 9.8  | 10.5 |
| 2022-05-31 7:00 AM  | 10.7 | 10.7 | 9.9  | 10.4 |
| 2022-05-31 8:00 AM  | 11.1 | 11.0 | 10.4 | 10.8 |
| 2022-05-31 9:00 AM  | 11.8 | 11.6 | 11.4 | 11.6 |

|                     |      |      |      |      |
|---------------------|------|------|------|------|
| 2022-05-31 10:00 AM | 13.3 | 12.7 | 13.4 | 13.1 |
| 2022-05-31 11:00 AM | 14.5 | 13.4 | 15.3 | 14.4 |
| 2022-05-31 12:00 PM | 16.8 | 15.6 | 19.9 | 17.4 |
| 2022-05-31 1:00 PM  | 16.9 | 16.6 | 20.8 | 18.1 |
| 2022-05-31 2:00 PM  | 16.9 | 17.2 | 19.8 | 18.0 |
| 2022-05-31 3:00 PM  | 17.4 | 17.8 | 20.1 | 18.4 |
| 2022-05-31 4:00 PM  | 17.8 | 19.4 | 21.1 | 19.4 |
| 2022-05-31 5:00 PM  | 17.0 | 18.1 | 19.3 | 18.1 |
| 2022-05-31 6:00 PM  | 17.0 | 19.9 | 20.5 | 19.1 |
| 2022-05-31 7:00 PM  | 16.0 | 16.8 | 17.7 | 16.8 |
| 2022-05-31 8:00 PM  | 15.3 | 15.9 | 16.5 | 15.9 |
| 2022-05-31 9:00 PM  | 14.6 | 15.2 | 15.4 | 15.1 |
| 2022-05-31 10:00 PM | 13.6 | 14.1 | 13.9 | 13.9 |
| 2022-05-31 11:00 PM | 12.7 | 13.1 | 12.6 | 12.8 |
| 2022-06-01 12:00 AM | 12.6 | 12.8 | 12.2 | 12.5 |
| 2022-06-01 1:00 AM  | 11.9 | 12.0 | 11.2 | 11.7 |
| 2022-06-01 2:00 AM  | 11.1 | 11.3 | 10.3 | 10.9 |
| 2022-06-01 3:00 AM  | 11.1 | 11.1 | 10.1 | 10.8 |
| 2022-06-01 4:00 AM  | 11.0 | 11.0 | 10.1 | 10.7 |
| 2022-06-01 5:00 AM  | 10.5 | 10.5 | 9.7  | 10.2 |
| 2022-06-01 6:00 AM  | 10.0 | 10.1 | 9.2  | 9.8  |
| 2022-06-01 7:00 AM  | 9.5  | 9.6  | 8.6  | 9.2  |
| 2022-06-01 8:00 AM  | 10.1 | 10.1 | 9.2  | 9.8  |
| 2022-06-01 9:00 AM  | 10.3 | 10.0 | 9.4  | 9.9  |
| 2022-06-01 10:00 AM | 11.3 | 10.8 | 10.5 | 10.9 |
| 2022-06-01 11:00 AM | 13.0 | 12.0 | 12.7 | 12.6 |
| 2022-06-01 12:00 PM | 14.5 | 12.7 | 15.5 | 14.2 |
| 2022-06-01 1:00 PM  | 13.3 | 13.1 | 17.9 | 14.8 |
| 2022-06-01 2:00 PM  | 13.7 | 14.4 | 18.8 | 15.6 |
| 2022-06-01 3:00 PM  | 14.5 | 16.6 | 21.4 | 17.5 |
| 2022-06-01 4:00 PM  | 15.4 | 24.1 | 24.3 | 21.3 |
| 2022-06-01 5:00 PM  | 15.3 | 24.1 | 23.2 | 20.9 |
| 2022-06-01 6:00 PM  | 15.3 | 26.7 | 24.8 | 22.3 |
| 2022-06-01 7:00 PM  | 15.1 | 20.2 | 20.6 | 18.6 |
| 2022-06-01 8:00 PM  | 14.7 | 16.4 | 16.9 | 16.0 |
| 2022-06-01 9:00 PM  | 13.7 | 14.8 | 14.6 | 14.4 |
| 2022-06-01 10:00 PM | 12.6 | 13.3 | 12.4 | 12.8 |
| 2022-06-01 11:00 PM | 11.7 | 12.1 | 10.8 | 11.5 |
| 2022-06-02 12:00 AM | 10.9 | 11.0 | 9.6  | 10.5 |
| 2022-06-02 1:00 AM  | 10.4 | 10.6 | 8.8  | 9.9  |
| 2022-06-02 2:00 AM  | 9.8  | 10.0 | 8.2  | 9.3  |
| 2022-06-02 3:00 AM  | 9.6  | 9.6  | 7.9  | 9.0  |
| 2022-06-02 4:00 AM  | 9.4  | 9.4  | 7.6  | 8.8  |



|                     |      |      |      |      |
|---------------------|------|------|------|------|
| 2022-06-02 5:00 AM  | 8.9  | 9.0  | 6.9  | 8.3  |
| 2022-06-02 6:00 AM  | 8.6  | 8.6  | 6.6  | 7.9  |
| 2022-06-02 7:00 AM  | 8.4  | 8.4  | 6.3  | 7.7  |
| 2022-06-02 8:00 AM  | 9.4  | 9.4  | 7.5  | 8.8  |
| 2022-06-02 9:00 AM  | 10.6 | 10.5 | 9.1  | 10.1 |
| 2022-06-02 10:00 AM | 12.2 | 11.5 | 11.0 | 11.6 |
| 2022-06-02 11:00 AM | 13.9 | 12.5 | 13.7 | 13.4 |
| 2022-06-02 12:00 PM | 14.8 | 12.7 | 15.7 | 14.4 |
| 2022-06-02 1:00 PM  | 14.4 | 13.9 | 19.3 | 15.9 |
| 2022-06-02 2:00 PM  | 15.5 | 16.1 | 20.5 | 17.4 |
| 2022-06-02 3:00 PM  | 15.4 | 16.0 | 18.6 | 16.7 |
| 2022-06-02 4:00 PM  | 14.7 | 15.0 | 16.3 | 15.3 |
| 2022-06-02 5:00 PM  | 15.4 | 18.9 | 19.0 | 17.8 |
| 2022-06-02 6:00 PM  | 15.6 | 20.6 | 20.7 | 19.0 |
| 2022-06-02 7:00 PM  | 15.1 | 17.7 | 18.3 | 17.0 |
| 2022-06-02 8:00 PM  | 14.3 | 15.4 | 15.7 | 15.1 |
| 2022-06-02 9:00 PM  | 13.4 | 14.2 | 14.1 | 13.9 |
| 2022-06-02 10:00 PM | 12.6 | 13.1 | 12.5 | 12.7 |
| 2022-06-02 11:00 PM | 12.3 | 12.7 | 11.9 | 12.3 |
| 2022-06-03 12:00 AM | 11.8 | 12.1 | 11.0 | 11.6 |
| 2022-06-03 1:00 AM  | 11.9 | 12.1 | 11.1 | 11.7 |
| 2022-06-03 2:00 AM  | 11.7 | 11.9 | 11.1 | 11.6 |
| 2022-06-03 3:00 AM  | 11.3 | 11.4 | 10.7 | 11.1 |
| 2022-06-03 4:00 AM  | 11.1 | 11.2 | 10.3 | 10.9 |
| 2022-06-03 5:00 AM  | 10.8 | 11.0 | 10.0 | 10.6 |
| 2022-06-03 6:00 AM  | 10.5 | 10.6 | 9.5  | 10.2 |
| 2022-06-03 7:00 AM  | 10.3 | 10.1 | 9.2  | 9.9  |
| 2022-06-03 8:00 AM  | 10.2 | 10.0 | 9.0  | 9.7  |
| 2022-06-03 9:00 AM  | 10.6 | 10.2 | 9.3  | 10.0 |
| 2022-06-03 10:00 AM | 11.4 | 10.7 | 10.2 | 10.8 |
| 2022-06-03 11:00 AM | 12.8 | 11.6 | 11.9 | 12.1 |
| 2022-06-03 12:00 PM | 14.5 | 12.5 | 15.0 | 14.0 |
| 2022-06-03 1:00 PM  | 14.1 | 13.3 | 16.3 | 14.6 |
| 2022-06-03 2:00 PM  | 14.1 | 14.3 | 17.5 | 15.3 |
| 2022-06-03 3:00 PM  | 13.9 | 14.6 | 17.2 | 15.2 |
| 2022-06-03 4:00 PM  | 14.3 | 19.6 | 19.2 | 17.7 |
| 2022-06-03 5:00 PM  | 14.3 | 17.3 | 17.2 | 16.3 |
| 2022-06-03 6:00 PM  | 13.0 | 13.7 | 14.2 | 13.6 |
| 2022-06-03 7:00 PM  | 12.6 | 12.4 | 12.9 | 12.6 |
| 2022-06-03 8:00 PM  | 11.8 | 11.7 | 12.1 | 11.9 |
| 2022-06-03 9:00 PM  | 11.6 | 11.7 | 11.6 | 11.6 |
| 2022-06-03 10:00 PM | 11.5 | 11.5 | 11.3 | 11.4 |
| 2022-06-03 11:00 PM | 10.9 | 11.1 | 10.4 | 10.8 |

|                     |      |      |      |      |
|---------------------|------|------|------|------|
| 2022-06-04 12:00 AM | 10.7 | 10.9 | 9.8  | 10.5 |
| 2022-06-04 1:00 AM  | 10.2 | 10.4 | 9.4  | 10.0 |
| 2022-06-04 2:00 AM  | 8.9  | 9.2  | 7.6  | 8.6  |
| 2022-06-04 3:00 AM  | 8.4  | 8.5  | 6.8  | 7.9  |
| 2022-06-04 4:00 AM  | 8.0  | 8.0  | 6.4  | 7.5  |
| 2022-06-04 5:00 AM  | 7.6  | 7.6  | 6.0  | 7.1  |
| 2022-06-04 6:00 AM  | 6.9  | 7.1  | 5.2  | 6.4  |
| 2022-06-04 7:00 AM  | 7.0  | 7.2  | 5.3  | 6.5  |
| 2022-06-04 8:00 AM  | 8.3  | 8.3  | 7.0  | 7.9  |
| 2022-06-04 9:00 AM  | 9.4  | 9.0  | 8.1  | 8.8  |
| 2022-06-04 10:00 AM | 11.0 | 10.1 | 9.4  | 10.2 |
| 2022-06-04 11:00 AM | 12.5 | 11.0 | 11.5 | 11.7 |
| 2022-06-04 12:00 PM | 13.8 | 11.7 | 14.9 | 13.5 |
| 2022-06-04 1:00 PM  | 13.5 | 12.7 | 17.6 | 14.6 |
| 2022-06-04 2:00 PM  | 13.6 | 13.7 | 17.7 | 15.0 |
| 2022-06-04 3:00 PM  | 14.2 | 15.6 | 18.9 | 16.2 |
| 2022-06-04 4:00 PM  | 14.1 | 21.2 | 21.3 | 18.9 |
| 2022-06-04 5:00 PM  | 13.8 | 21.6 | 20.1 | 18.5 |
| 2022-06-04 6:00 PM  | 13.0 | 20.3 | 19.2 | 17.5 |
| 2022-06-04 7:00 PM  | 12.7 | 16.6 | 16.9 | 15.4 |
| 2022-06-04 8:00 PM  | 11.8 | 13.0 | 12.8 | 12.5 |
| 2022-06-04 9:00 PM  | 11.3 | 12.0 | 11.5 | 11.6 |
| 2022-06-04 10:00 PM | 10.5 | 11.1 | 10.2 | 10.6 |
| 2022-06-04 11:00 PM | 10.0 | 10.6 | 9.4  | 10.0 |
| 2022-06-05 12:00 AM | 9.6  | 10.1 | 8.9  | 9.5  |
| 2022-06-05 1:00 AM  | 9.1  | 9.4  | 8.2  | 8.9  |
| 2022-06-05 2:00 AM  | 8.5  | 8.8  | 7.2  | 8.2  |
| 2022-06-05 3:00 AM  | 8.0  | 8.2  | 6.6  | 7.6  |
| 2022-06-05 4:00 AM  | 7.5  | 7.7  | 6.2  | 7.1  |
| 2022-06-05 5:00 AM  | 7.1  | 7.3  | 5.7  | 6.7  |
| 2022-06-05 6:00 AM  | 6.8  | 7.0  | 5.4  | 6.4  |
| 2022-06-05 7:00 AM  | 6.5  | 6.9  | 5.1  | 6.2  |
| 2022-06-05 8:00 AM  | 7.2  | 7.6  | 5.8  | 6.9  |
| 2022-06-05 9:00 AM  | 8.8  | 9.0  | 7.5  | 8.4  |
| 2022-06-05 10:00 AM | 10.9 | 10.1 | 9.4  | 10.1 |
| 2022-06-05 11:00 AM | 12.4 | 11.2 | 11.8 | 11.8 |
| 2022-06-05 12:00 PM | 13.6 | 12.3 | 14.9 | 13.6 |
| 2022-06-05 1:00 PM  | 14.1 | 13.5 | 17.4 | 15.0 |
| 2022-06-05 2:00 PM  | 13.7 | 14.7 | 18.6 | 15.7 |
| 2022-06-05 3:00 PM  | 13.9 | 16.0 | 20.0 | 16.6 |
| 2022-06-05 4:00 PM  | 14.6 | 22.8 | 22.3 | 19.9 |
| 2022-06-05 5:00 PM  | 14.4 | 18.4 | 18.7 | 17.2 |
| 2022-06-05 6:00 PM  | 14.3 | 21.2 | 21.1 | 18.9 |

|                     |      |      |      |      |
|---------------------|------|------|------|------|
| 2022-06-05 7:00 PM  | 13.4 | 16.7 | 17.9 | 16.0 |
| 2022-06-05 8:00 PM  | 12.6 | 13.6 | 13.8 | 13.3 |
| 2022-06-05 9:00 PM  | 11.9 | 12.6 | 12.2 | 12.2 |
| 2022-06-05 10:00 PM | 11.2 | 11.8 | 11.1 | 11.4 |
| 2022-06-05 11:00 PM | 10.9 | 11.4 | 10.5 | 10.9 |
| 2022-06-06 12:00 AM | 10.7 | 11.2 | 10.1 | 10.7 |
| 2022-06-06 1:00 AM  | 10.4 | 10.9 | 9.7  | 10.3 |
| 2022-06-06 2:00 AM  | 10.6 | 11.0 | 10.0 | 10.5 |
| 2022-06-06 3:00 AM  | 10.7 | 11.2 | 10.2 | 10.7 |
| 2022-06-06 4:00 AM  | 10.8 | 11.2 | 10.3 | 10.8 |
| 2022-06-06 5:00 AM  | 11.2 | 11.3 | 10.6 | 11.0 |
| 2022-06-06 6:00 AM  | 11.0 | 11.4 | 10.5 | 11.0 |
| 2022-06-06 7:00 AM  | 11.2 | 11.4 | 10.6 | 11.1 |
| 2022-06-06 8:00 AM  | 11.7 | 11.6 | 11.2 | 11.5 |
| 2022-06-06 9:00 AM  | 11.7 | 11.9 | 11.4 | 11.7 |
| 2022-06-06 10:00 AM | 11.8 | 11.7 | 11.5 | 11.7 |
| 2022-06-06 11:00 AM | 12.2 | 12.2 | 12.1 | 12.2 |
| 2022-06-06 12:00 PM | 12.3 | 12.3 | 12.2 | 12.3 |
| 2022-06-06 1:00 PM  | 13.2 | 13.0 | 13.2 | 13.1 |
| 2022-06-06 2:00 PM  | 14.6 | 14.9 | 16.8 | 15.4 |
| 2022-06-06 3:00 PM  | 15.1 | 16.5 | 20.5 | 17.4 |
| 2022-06-06 4:00 PM  | 16.0 | 22.1 | 24.3 | 20.8 |
| 2022-06-06 5:00 PM  | 15.8 | 21.9 | 22.7 | 20.1 |
| 2022-06-06 6:00 PM  | 15.2 | 22.1 | 23.0 | 20.1 |
| 2022-06-06 7:00 PM  | 14.8 | 18.6 | 20.2 | 17.9 |
| 2022-06-06 8:00 PM  | 14.2 | 15.5 | 16.0 | 15.2 |
| 2022-06-06 9:00 PM  | 14.1 | 14.9 | 15.1 | 14.7 |
| 2022-06-06 10:00 PM | 13.4 | 14.1 | 14.0 | 13.8 |
| 2022-06-06 11:00 PM | 12.2 | 12.8 | 12.0 | 12.3 |
| 2022-06-07 12:00 AM | 11.7 | 12.3 | 11.2 | 11.7 |
| 2022-06-07 1:00 AM  | 11.2 | 11.8 | 10.5 | 11.2 |
| 2022-06-07 2:00 AM  | 11.1 | 11.5 | 10.2 | 10.9 |
| 2022-06-07 3:00 AM  | 10.6 | 11.2 | 9.6  | 10.5 |
| 2022-06-07 4:00 AM  | 9.8  | 10.5 | 8.9  | 9.7  |
| 2022-06-07 5:00 AM  | 9.3  | 9.9  | 8.3  | 9.2  |
| 2022-06-07 6:00 AM  | 9.0  | 9.6  | 7.9  | 8.8  |
| 2022-06-07 7:00 AM  | 9.1  | 9.6  | 7.9  | 8.9  |
| 2022-06-07 8:00 AM  | 9.8  | 10.3 | 8.6  | 9.6  |
| 2022-06-07 9:00 AM  | 11.1 | 11.3 | 10.2 | 10.9 |
| 2022-06-07 10:00 AM | 12.9 | 13.0 | 12.4 | 12.8 |
| 2022-06-07 11:00 AM | 14.0 | 14.5 | 15.0 | 14.5 |
| 2022-06-07 12:00 PM | 14.0 | 14.4 | 15.4 | 14.6 |
| 2022-06-07 1:00 PM  | 14.5 | 14.9 | 17.6 | 15.7 |

|                     |      |      |      |      |
|---------------------|------|------|------|------|
| 2022-06-07 2:00 PM  | 14.8 | 15.1 | 17.5 | 15.8 |
| 2022-06-07 3:00 PM  | 14.6 | 15.7 | 16.9 | 15.7 |
| 2022-06-07 4:00 PM  | 15.8 | 19.5 | 20.9 | 18.7 |
| 2022-06-07 5:00 PM  | 15.0 | 18.3 | 19.1 | 17.5 |
| 2022-06-07 6:00 PM  | 15.1 | 18.7 | 19.4 | 17.7 |
| 2022-06-07 7:00 PM  | 15.2 | 17.1 | 18.6 | 17.0 |
| 2022-06-07 8:00 PM  | 14.5 | 15.3 | 15.8 | 15.2 |
| 2022-06-07 9:00 PM  | 14.4 | 14.9 | 15.1 | 14.8 |
| 2022-06-07 10:00 PM | 13.2 | 13.6 | 13.0 | 13.3 |
| 2022-06-07 11:00 PM | 12.8 | 13.1 | 12.3 | 12.7 |
| 2022-06-08 12:00 AM | 12.0 | 12.4 | 11.4 | 11.9 |
| 2022-06-08 1:00 AM  | 11.9 | 12.2 | 11.1 | 11.7 |
| 2022-06-08 2:00 AM  | 11.8 | 12.1 | 11.1 | 11.7 |
| 2022-06-08 3:00 AM  | 11.5 | 11.9 | 10.6 | 11.3 |
| 2022-06-08 4:00 AM  | 11.0 | 11.3 | 10.0 | 10.8 |
| 2022-06-08 5:00 AM  | 10.7 | 11.1 | 9.6  | 10.5 |
| 2022-06-08 6:00 AM  | 11.2 | 11.5 | 10.3 | 11.0 |
| 2022-06-08 7:00 AM  | 11.5 | 11.7 | 10.6 | 11.3 |
| 2022-06-08 8:00 AM  | 12.1 | 12.1 | 11.2 | 11.8 |
| 2022-06-08 9:00 AM  | 13.0 | 12.8 | 12.4 | 12.7 |
| 2022-06-08 10:00 AM | 14.2 | 13.4 | 13.4 | 13.7 |
| 2022-06-08 11:00 AM | 15.3 | 14.8 | 15.7 | 15.3 |
| 2022-06-08 12:00 PM | 16.6 | 15.5 | 18.7 | 16.9 |
| 2022-06-08 1:00 PM  | 16.1 | 15.8 | 19.2 | 17.0 |
| 2022-06-08 2:00 PM  | 15.6 | 15.6 | 17.9 | 16.4 |
| 2022-06-08 3:00 PM  | 14.6 | 14.3 | 14.7 | 14.5 |
| 2022-06-08 4:00 PM  | 14.7 | 14.5 | 14.9 | 14.7 |
| 2022-06-08 5:00 PM  | 15.1 | 15.2 | 15.8 | 15.4 |
| 2022-06-08 6:00 PM  | 15.7 | 16.7 | 17.7 | 16.7 |
| 2022-06-08 7:00 PM  | 15.3 | 16.2 | 17.5 | 16.3 |
| 2022-06-08 8:00 PM  | 15.2 | 15.4 | 16.2 | 15.6 |
| 2022-06-08 9:00 PM  | 14.7 | 14.8 | 15.1 | 14.9 |
| 2022-06-08 10:00 PM | 14.0 | 14.0 | 13.9 | 14.0 |
| 2022-06-08 11:00 PM | 13.4 | 13.4 | 13.0 | 13.3 |
| 2022-06-09 12:00 AM | 13.2 | 13.1 | 12.6 | 13.0 |
| 2022-06-09 1:00 AM  | 13.1 | 13.1 | 12.5 | 12.9 |
| 2022-06-09 2:00 AM  | 12.8 | 12.8 | 12.1 | 12.6 |
| 2022-06-09 3:00 AM  | 12.2 | 12.3 | 11.3 | 11.9 |
| 2022-06-09 4:00 AM  | 11.8 | 11.9 | 10.7 | 11.5 |
| 2022-06-09 5:00 AM  | 11.9 | 12.1 | 10.9 | 11.6 |
| 2022-06-09 6:00 AM  | 11.9 | 12.1 | 11.0 | 11.7 |
| 2022-06-09 7:00 AM  | 12.0 | 12.0 | 11.1 | 11.7 |
| 2022-06-09 8:00 AM  | 12.7 | 12.6 | 11.9 | 12.4 |

|                     |      |      |      |      |
|---------------------|------|------|------|------|
| 2022-06-09 9:00 AM  | 13.4 | 13.2 | 13.0 | 13.2 |
| 2022-06-09 10:00 AM | 14.0 | 13.2 | 12.9 | 13.4 |
| 2022-06-09 11:00 AM | 14.6 | 14.0 | 14.4 | 14.3 |
| 2022-06-09 12:00 PM | 15.2 | 14.5 | 16.1 | 15.3 |
| 2022-06-09 1:00 PM  | 15.9 | 15.6 | 18.7 | 16.7 |
| 2022-06-09 2:00 PM  | 15.3 | 15.3 | 16.6 | 15.7 |
| 2022-06-09 3:00 PM  | 15.5 | 16.1 | 17.7 | 16.4 |
| 2022-06-09 4:00 PM  | 16.2 | 19.2 | 20.3 | 18.6 |
| 2022-06-09 5:00 PM  | 15.6 | 17.5 | 18.2 | 17.1 |
| 2022-06-09 6:00 PM  | 15.5 | 18.7 | 19.1 | 17.8 |
| 2022-06-09 7:00 PM  | 15.4 | 17.5 | 18.7 | 17.2 |
| 2022-06-09 8:00 PM  | 15.0 | 15.7 | 16.3 | 15.7 |
| 2022-06-09 9:00 PM  | 15.0 | 15.4 | 15.6 | 15.3 |
| 2022-06-09 10:00 PM | 14.8 | 15.0 | 15.0 | 14.9 |
| 2022-06-09 11:00 PM | 13.6 | 14.0 | 13.3 | 13.6 |
| 2022-06-10 12:00 AM | 13.2 | 13.5 | 12.6 | 13.1 |
| 2022-06-10 1:00 AM  | 13.0 | 13.3 | 12.4 | 12.9 |
| 2022-06-10 2:00 AM  | 12.5 | 12.6 | 11.6 | 12.2 |
| 2022-06-10 3:00 AM  | 12.4 | 12.6 | 11.6 | 12.2 |
| 2022-06-10 4:00 AM  | 12.2 | 12.4 | 11.4 | 12.0 |
| 2022-06-10 5:00 AM  | 11.6 | 11.8 | 10.5 | 11.3 |
| 2022-06-10 6:00 AM  | 11.2 | 11.4 | 9.9  | 10.8 |
| 2022-06-10 7:00 AM  | 11.2 | 11.3 | 9.9  | 10.8 |
| 2022-06-10 8:00 AM  | 11.2 | 11.4 | 10.0 | 10.9 |
| 2022-06-10 9:00 AM  | 12.3 | 12.4 | 11.2 | 12.0 |
| 2022-06-10 10:00 AM | 14.0 | 13.2 | 12.9 | 13.4 |
| 2022-06-10 11:00 AM | 14.8 | 14.3 | 14.8 | 14.6 |
| 2022-06-10 12:00 PM | 15.9 | 15.2 | 16.8 | 16.0 |
| 2022-06-10 1:00 PM  | 16.4 | 16.5 | 19.3 | 17.4 |
| 2022-06-10 2:00 PM  | 16.1 | 17.3 | 19.6 | 17.7 |
| 2022-06-10 3:00 PM  | 16.1 | 17.8 | 20.4 | 18.1 |
| 2022-06-10 4:00 PM  | 16.8 | 24.2 | 24.8 | 21.9 |
| 2022-06-10 5:00 PM  | 16.3 | 21.3 | 21.8 | 19.8 |
| 2022-06-10 6:00 PM  | 16.5 | 22.7 | 23.6 | 20.9 |
| 2022-06-10 7:00 PM  | 16.2 | 19.6 | 21.4 | 19.1 |
| 2022-06-10 8:00 PM  | 15.7 | 17.2 | 18.0 | 17.0 |
| 2022-06-10 9:00 PM  | 15.6 | 16.6 | 17.0 | 16.4 |
| 2022-06-10 10:00 PM | 15.1 | 15.9 | 15.8 | 15.6 |
| 2022-06-10 11:00 PM | 13.6 | 14.3 | 13.4 | 13.8 |
| 2022-06-11 12:00 AM | 12.9 | 13.4 | 12.3 | 12.9 |
| 2022-06-11 1:00 AM  | 12.4 | 12.8 | 11.6 | 12.3 |
| 2022-06-11 2:00 AM  | 12.3 | 12.6 | 11.4 | 12.1 |
| 2022-06-11 3:00 AM  | 12.2 | 12.4 | 11.2 | 11.9 |

|                     |      |      |      |      |
|---------------------|------|------|------|------|
| 2022-06-11 4:00 AM  | 11.9 | 12.1 | 10.8 | 11.6 |
| 2022-06-11 5:00 AM  | 11.4 | 11.5 | 10.2 | 11.0 |
| 2022-06-11 6:00 AM  | 11.3 | 11.4 | 9.9  | 10.9 |
| 2022-06-11 7:00 AM  | 11.6 | 11.5 | 10.3 | 11.1 |
| 2022-06-11 8:00 AM  | 12.1 | 11.6 | 10.8 | 11.5 |
| 2022-06-11 9:00 AM  | 12.5 | 12.1 | 11.3 | 12.0 |
| 2022-06-11 10:00 AM | 13.7 | 13.3 | 12.8 | 13.3 |
| 2022-06-11 11:00 AM | 14.4 | 14.3 | 14.5 | 14.4 |
| 2022-06-11 12:00 PM | 14.4 | 14.4 | 14.8 | 14.5 |
| 2022-06-11 1:00 PM  | 15.4 | 15.7 | 18.6 | 16.6 |
| 2022-06-11 2:00 PM  | 15.1 | 16.6 | 19.2 | 17.0 |
| 2022-06-11 3:00 PM  | 14.9 | 16.3 | 17.4 | 16.2 |
| 2022-06-11 4:00 PM  | 15.5 | 23.6 | 21.4 | 20.2 |
| 2022-06-11 5:00 PM  | 14.8 | 19.4 | 17.9 | 17.4 |
| 2022-06-11 6:00 PM  | 14.7 | 20.3 | 18.3 | 17.8 |
| 2022-06-11 7:00 PM  | 14.5 | 17.6 | 17.9 | 16.7 |
| 2022-06-11 8:00 PM  | 13.8 | 14.8 | 14.4 | 14.3 |
| 2022-06-11 9:00 PM  | 13.5 | 14.2 | 13.6 | 13.8 |
| 2022-06-11 10:00 PM | 13.2 | 13.7 | 12.9 | 13.3 |
| 2022-06-11 11:00 PM | 12.5 | 12.9 | 12.0 | 12.5 |
| 2022-06-12 12:00 AM | 12.1 | 12.3 | 11.4 | 11.9 |
| 2022-06-12 1:00 AM  | 11.6 | 11.8 | 10.7 | 11.4 |
| 2022-06-12 2:00 AM  | 11.2 | 11.3 | 10.0 | 10.8 |
| 2022-06-12 3:00 AM  | 10.8 | 10.8 | 9.6  | 10.4 |
| 2022-06-12 4:00 AM  | 10.4 | 10.4 | 9.1  | 10.0 |
| 2022-06-12 5:00 AM  | 10.0 | 10.0 | 8.8  | 9.6  |
| 2022-06-12 6:00 AM  | 9.5  | 9.6  | 8.3  | 9.1  |
| 2022-06-12 7:00 AM  | 9.4  | 9.5  | 8.2  | 9.0  |
| 2022-06-12 8:00 AM  | 9.9  | 10.0 | 8.7  | 9.5  |
| 2022-06-12 9:00 AM  | 11.1 | 11.2 | 10.0 | 10.8 |
| 2022-06-12 10:00 AM | 12.9 | 12.4 | 11.9 | 12.4 |
| 2022-06-12 11:00 AM | 14.1 | 13.8 | 14.3 | 14.1 |
| 2022-06-12 12:00 PM | 15.2 | 14.8 | 16.4 | 15.5 |
| 2022-06-12 1:00 PM  | 15.3 | 15.5 | 18.7 | 16.5 |
| 2022-06-12 2:00 PM  | 14.8 | 15.5 | 17.8 | 16.0 |
| 2022-06-12 3:00 PM  | 14.7 | 15.3 | 17.3 | 15.8 |
| 2022-06-12 4:00 PM  | 14.8 | 18.3 | 20.9 | 18.0 |
| 2022-06-12 5:00 PM  | 14.4 | 15.6 | 16.7 | 15.6 |
| 2022-06-12 6:00 PM  | 14.5 | 15.8 | 16.8 | 15.7 |
| 2022-06-12 7:00 PM  | 14.4 | 15.1 | 16.0 | 15.2 |
| 2022-06-12 8:00 PM  | 14.1 | 14.4 | 14.9 | 14.5 |
| 2022-06-12 9:00 PM  | 13.9 | 14.1 | 14.2 | 14.1 |
| 2022-06-12 10:00 PM | 13.3 | 13.4 | 12.8 | 13.2 |

|                     |      |      |      |      |
|---------------------|------|------|------|------|
| 2022-06-12 11:00 PM | 12.9 | 13.0 | 12.1 | 12.7 |
| 2022-06-13 12:00 AM | 12.7 | 12.8 | 11.7 | 12.4 |
| 2022-06-13 1:00 AM  | 12.9 | 12.9 | 11.9 | 12.6 |
| 2022-06-13 2:00 AM  | 12.9 | 12.7 | 11.9 | 12.5 |
| 2022-06-13 3:00 AM  | 12.7 | 12.6 | 11.8 | 12.4 |
| 2022-06-13 4:00 AM  | 12.7 | 12.5 | 11.7 | 12.3 |
| 2022-06-13 5:00 AM  | 12.6 | 12.5 | 11.7 | 12.3 |
| 2022-06-13 6:00 AM  | 12.3 | 12.2 | 11.2 | 11.9 |
| 2022-06-13 7:00 AM  | 12.1 | 11.9 | 10.7 | 11.6 |
| 2022-06-13 8:00 AM  | 12.0 | 11.7 | 10.6 | 11.4 |
| 2022-06-13 9:00 AM  | 12.1 | 11.8 | 10.8 | 11.6 |
| 2022-06-13 10:00 AM | 12.5 | 12.1 | 11.4 | 12.0 |
| 2022-06-13 11:00 AM | 12.4 | 12.1 | 11.4 | 12.0 |
| 2022-06-13 12:00 PM | 12.5 | 12.3 | 11.7 | 12.2 |
| 2022-06-13 1:00 PM  | 12.9 | 12.6 | 12.4 | 12.6 |
| 2022-06-13 2:00 PM  | 12.9 | 12.7 | 12.5 | 12.7 |
| 2022-06-13 3:00 PM  | 12.6 | 12.4 | 11.9 | 12.3 |
| 2022-06-13 4:00 PM  | 12.6 | 12.3 | 11.7 | 12.2 |
| 2022-06-13 5:00 PM  | 12.3 | 12.1 | 11.4 | 11.9 |
| 2022-06-13 6:00 PM  | 12.2 | 12.0 | 11.3 | 11.8 |
| 2022-06-13 7:00 PM  | 12.2 | 12.0 | 11.2 | 11.8 |
| 2022-06-13 8:00 PM  | 12.1 | 11.9 | 11.1 | 11.7 |
| 2022-06-13 9:00 PM  | 12.2 | 12.1 | 11.5 | 11.9 |
| 2022-06-13 10:00 PM | 12.3 | 12.1 | 11.4 | 11.9 |
| 2022-06-13 11:00 PM | 12.0 | 12.0 | 11.2 | 11.7 |
| 2022-06-14 12:00 AM | 12.0 | 12.0 | 11.2 | 11.7 |
| 2022-06-14 1:00 AM  | 12.0 | 11.9 | 11.2 | 11.7 |
| 2022-06-14 2:00 AM  | 12.0 | 11.9 | 11.2 | 11.7 |
| 2022-06-14 3:00 AM  | 12.0 | 11.8 | 11.1 | 11.6 |
| 2022-06-14 4:00 AM  | 11.9 | 11.8 | 11.1 | 11.6 |
| 2022-06-14 5:00 AM  | 11.9 | 11.8 | 11.1 | 11.6 |
| 2022-06-14 6:00 AM  | 11.9 | 11.8 | 11.1 | 11.6 |
| 2022-06-14 7:00 AM  | 11.9 | 11.8 | 11.2 | 11.6 |
| 2022-06-14 8:00 AM  | 12.0 | 11.9 | 11.4 | 11.8 |
| 2022-06-14 9:00 AM  | 11.9 | 11.8 | 11.3 | 11.7 |
| 2022-06-14 10:00 AM | 12.0 | 11.9 | 11.5 | 11.8 |
| 2022-06-14 11:00 AM | 12.1 | 12.0 | 11.8 | 12.0 |
| 2022-06-14 12:00 PM | 11.9 | 11.8 | 11.4 | 11.7 |
| 2022-06-14 1:00 PM  | 12.0 | 11.9 | 11.6 | 11.8 |
| 2022-06-14 2:00 PM  | 12.2 | 12.1 | 11.9 | 12.1 |
| 2022-06-14 3:00 PM  | 12.4 | 12.4 | 12.4 | 12.4 |
| 2022-06-14 4:00 PM  | 12.7 | 12.8 | 13.1 | 12.9 |
| 2022-06-14 5:00 PM  | 12.9 | 13.0 | 13.6 | 13.2 |

|                     |      |      |      |      |
|---------------------|------|------|------|------|
| 2022-06-14 6:00 PM  | 13.0 | 13.2 | 13.8 | 13.3 |
| 2022-06-14 7:00 PM  | 13.1 | 13.3 | 14.0 | 13.5 |
| 2022-06-14 8:00 PM  | 13.0 | 13.1 | 13.6 | 13.2 |
| 2022-06-14 9:00 PM  | 12.7 | 12.7 | 12.8 | 12.7 |
| 2022-06-14 10:00 PM | 12.6 | 12.5 | 12.4 | 12.5 |
| 2022-06-14 11:00 PM | 12.6 | 12.6 | 12.4 | 12.5 |
| 2022-06-15 12:00 AM | 12.8 | 12.8 | 12.8 | 12.8 |
| 2022-06-15 1:00 AM  | 12.9 | 12.9 | 13.0 | 12.9 |
| 2022-06-15 2:00 AM  | 12.8 | 12.8 | 12.8 | 12.8 |
| 2022-06-15 3:00 AM  | 12.7 | 12.6 | 12.4 | 12.6 |
| 2022-06-15 4:00 AM  | 12.6 | 12.6 | 12.3 | 12.5 |
| 2022-06-15 5:00 AM  | 12.6 | 12.6 | 12.3 | 12.5 |
| 2022-06-15 6:00 AM  | 12.6 | 12.6 | 12.1 | 12.4 |
| 2022-06-15 7:00 AM  | 12.6 | 12.6 | 12.1 | 12.4 |
| 2022-06-15 8:00 AM  | 12.7 | 12.7 | 12.4 | 12.6 |
| 2022-06-15 9:00 AM  | 13.0 | 13.0 | 13.1 | 13.0 |
| 2022-06-15 10:00 AM | 14.2 | 13.9 | 14.2 | 14.1 |
| 2022-06-15 11:00 AM | 15.8 | 15.5 | 15.9 | 15.7 |
| 2022-06-15 12:00 PM | 17.0 | 16.2 | 17.2 | 16.8 |
| 2022-06-15 1:00 PM  | 18.1 | 17.4 | 19.0 | 18.2 |
| 2022-06-15 2:00 PM  | 16.5 | 16.3 | 17.2 | 16.7 |
| 2022-06-15 3:00 PM  | 16.8 | 17.2 | 17.6 | 17.2 |
| 2022-06-15 4:00 PM  | 16.6 | 21.2 | 20.2 | 19.3 |
| 2022-06-15 5:00 PM  | 16.9 | 17.9 | 18.0 | 17.6 |
| 2022-06-15 6:00 PM  | 16.6 | 16.9 | 17.3 | 16.9 |
| 2022-06-15 7:00 PM  | 16.2 | 16.6 | 17.0 | 16.6 |
| 2022-06-15 8:00 PM  | 15.5 | 15.6 | 15.8 | 15.6 |
| 2022-06-15 9:00 PM  | 15.2 | 15.2 | 15.3 | 15.2 |
| 2022-06-15 10:00 PM | 13.8 | 13.7 | 13.7 | 13.7 |
| 2022-06-15 11:00 PM | 13.2 | 13.1 | 12.9 | 13.1 |
| 2022-06-16 12:00 AM | 13.0 | 12.8 | 12.6 | 12.8 |
| 2022-06-16 1:00 AM  | 13.1 | 13.0 | 12.7 | 12.9 |
| 2022-06-16 2:00 AM  | 13.1 | 13.2 | 12.7 | 13.0 |
| 2022-06-16 3:00 AM  | 12.8 | 12.7 | 12.3 | 12.6 |
| 2022-06-16 4:00 AM  | 12.3 | 12.2 | 11.7 | 12.1 |
| 2022-06-16 5:00 AM  | 11.9 | 12.0 | 11.4 | 11.8 |
| 2022-06-16 6:00 AM  | 11.5 | 11.5 | 11.0 | 11.3 |
| 2022-06-16 7:00 AM  | 11.6 | 11.4 | 10.9 | 11.3 |
| 2022-06-16 8:00 AM  | 12.0 | 11.8 | 11.2 | 11.7 |
| 2022-06-16 9:00 AM  | 12.6 | 12.1 | 11.8 | 12.2 |
| 2022-06-16 10:00 AM | 13.5 | 13.0 | 12.7 | 13.1 |
| 2022-06-16 11:00 AM | 14.9 | 14.1 | 13.9 | 14.3 |
| 2022-06-16 12:00 PM | 18.6 | 15.5 | 17.1 | 17.1 |



|                     |      |      |      |      |
|---------------------|------|------|------|------|
| 2022-06-16 1:00 PM  | 17.6 | 16.6 | 18.2 | 17.5 |
| 2022-06-16 2:00 PM  | 16.9 | 16.8 | 18.1 | 17.3 |
| 2022-06-16 3:00 PM  | 17.1 | 17.1 | 17.8 | 17.3 |
| 2022-06-16 4:00 PM  | 17.1 | 19.8 | 18.7 | 18.5 |
| 2022-06-16 5:00 PM  | 17.3 | 18.3 | 18.2 | 17.9 |
| 2022-06-16 6:00 PM  | 17.3 | 21.3 | 19.8 | 19.5 |
| 2022-06-16 7:00 PM  | 17.1 | 19.0 | 18.7 | 18.3 |
| 2022-06-16 8:00 PM  | 16.2 | 17.3 | 17.1 | 16.9 |
| 2022-06-16 9:00 PM  | 15.9 | 16.6 | 16.4 | 16.3 |
| 2022-06-16 10:00 PM | 15.4 | 16.0 | 15.8 | 15.7 |
| 2022-06-16 11:00 PM | 15.0 | 15.6 | 15.2 | 15.3 |
| 2022-06-17 12:00 AM | 14.8 | 15.3 | 14.8 | 15.0 |
| 2022-06-17 1:00 AM  | 14.6 | 15.1 | 14.6 | 14.8 |
| 2022-06-17 2:00 AM  | 14.4 | 14.9 | 14.3 | 14.5 |
| 2022-06-17 3:00 AM  | 14.1 | 14.6 | 13.8 | 14.2 |
| 2022-06-17 4:00 AM  | 13.8 | 14.3 | 13.5 | 13.9 |
| 2022-06-17 5:00 AM  | 13.9 | 14.3 | 13.5 | 13.9 |
| 2022-06-17 6:00 AM  | 13.8 | 14.2 | 13.5 | 13.8 |
| 2022-06-17 7:00 AM  | 14.0 | 14.4 | 13.7 | 14.0 |
| 2022-06-17 8:00 AM  | 14.1 | 14.7 | 14.1 | 14.3 |
| 2022-06-17 9:00 AM  | 14.1 | 14.9 | 14.1 | 14.4 |
| 2022-06-17 10:00 AM | 16.1 | 15.5 | 14.6 | 15.4 |
| 2022-06-17 11:00 AM | 17.3 | 16.3 | 15.9 | 16.5 |
| 2022-06-17 12:00 PM | 21.2 | 17.3 | 18.5 | 19.0 |
| 2022-06-17 1:00 PM  | 19.5 | 18.5 | 21.2 | 19.7 |
| 2022-06-17 2:00 PM  | 17.3 | 19.5 | 21.4 | 19.4 |
| 2022-06-17 3:00 PM  | 17.3 | 20.8 | 21.4 | 19.8 |
| 2022-06-17 4:00 PM  | 17.5 | 29.6 | 25.8 | 24.3 |
| 2022-06-17 5:00 PM  | 16.6 | 22.2 | 20.3 | 19.7 |
| 2022-06-17 6:00 PM  | 17.0 | 28.1 | 22.8 | 22.6 |
| 2022-06-17 7:00 PM  | 16.5 | 23.0 | 21.3 | 20.3 |
| 2022-06-17 8:00 PM  | 15.6 | 18.2 | 17.3 | 17.0 |
| 2022-06-17 9:00 PM  | 15.2 | 17.3 | 16.4 | 16.3 |
| 2022-06-17 10:00 PM | 14.4 | 15.9 | 15.0 | 15.1 |
| 2022-06-17 11:00 PM | 13.3 | 14.5 | 13.4 | 13.7 |
| 2022-06-18 12:00 AM | 12.8 | 13.8 | 12.6 | 13.1 |
| 2022-06-18 1:00 AM  | 12.0 | 13.0 | 11.6 | 12.2 |
| 2022-06-18 2:00 AM  | 11.7 | 12.2 | 11.1 | 11.7 |
| 2022-06-18 3:00 AM  | 11.3 | 12.0 | 10.7 | 11.3 |
| 2022-06-18 4:00 AM  | 10.7 | 11.4 | 10.0 | 10.7 |
| 2022-06-18 5:00 AM  | 9.9  | 10.9 | 9.1  | 10.0 |
| 2022-06-18 6:00 AM  | 9.3  | 10.2 | 8.5  | 9.3  |
| 2022-06-18 7:00 AM  | 9.1  | 10.1 | 8.3  | 9.2  |

|                     |      |      |      |      |
|---------------------|------|------|------|------|
| 2022-06-18 8:00 AM  | 10.1 | 10.8 | 9.2  | 10.0 |
| 2022-06-18 9:00 AM  | 12.0 | 12.4 | 11.0 | 11.8 |
| 2022-06-18 10:00 AM | 14.7 | 13.4 | 12.6 | 13.6 |
| 2022-06-18 11:00 AM | 15.9 | 14.5 | 14.5 | 15.0 |
| 2022-06-18 12:00 PM | 17.9 | 14.9 | 16.3 | 16.4 |
| 2022-06-18 1:00 PM  | 17.1 | 15.6 | 17.9 | 16.9 |
| 2022-06-18 2:00 PM  | 15.4 | 16.2 | 18.3 | 16.6 |
| 2022-06-18 3:00 PM  | 14.7 | 15.5 | 15.4 | 15.2 |
| 2022-06-18 4:00 PM  | 14.6 | 25.2 | 19.5 | 19.8 |
| 2022-06-18 5:00 PM  | 14.3 | 18.3 | 16.3 | 16.3 |
| 2022-06-18 6:00 PM  | 14.3 | 20.9 | 17.1 | 17.4 |
| 2022-06-18 7:00 PM  | 14.0 | 17.8 | 16.6 | 16.1 |
| 2022-06-18 8:00 PM  | 13.9 | 15.2 | 14.6 | 14.6 |
| 2022-06-18 9:00 PM  | 13.2 | 14.3 | 13.7 | 13.7 |
| 2022-06-18 10:00 PM | 12.4 | 13.4 | 12.6 | 12.8 |
| 2022-06-18 11:00 PM | 11.7 | 12.6 | 11.7 | 12.0 |
| 2022-06-19 12:00 AM | 11.2 | 12.0 | 10.9 | 11.4 |
| 2022-06-19 1:00 AM  | 11.2 | 11.8 | 10.8 | 11.3 |
| 2022-06-19 2:00 AM  | 11.2 | 11.7 | 10.8 | 11.2 |
| 2022-06-19 3:00 AM  | 11.8 | 12.2 | 11.3 | 11.8 |
| 2022-06-19 4:00 AM  | 11.3 | 11.9 | 11.0 | 11.4 |
| 2022-06-19 5:00 AM  | 11.1 | 11.7 | 10.8 | 11.2 |
| 2022-06-19 6:00 AM  | 11.3 | 11.8 | 11.0 | 11.4 |
| 2022-06-19 7:00 AM  | 11.1 | 11.5 | 10.6 | 11.1 |
| 2022-06-19 8:00 AM  | 11.4 | 11.6 | 10.8 | 11.3 |
| 2022-06-19 9:00 AM  | 11.5 | 11.7 | 11.0 | 11.4 |
| 2022-06-19 10:00 AM | 9.9  | 10.4 | 9.4  | 9.9  |
| 2022-06-19 11:00 AM | 9.9  | 10.1 | 9.2  | 9.7  |
| 2022-06-19 12:00 PM | 10.7 | 10.7 | 9.8  | 10.4 |
| 2022-06-19 1:00 PM  | 12.1 | 12.2 | 11.6 | 12.0 |
| 2022-06-19 2:00 PM  | 13.4 | 13.3 | 13.2 | 13.3 |
| 2022-06-19 3:00 PM  | 13.0 | 13.3 | 13.5 | 13.3 |
| 2022-06-19 4:00 PM  | 13.3 | 14.6 | 13.9 | 13.9 |
| 2022-06-19 5:00 PM  | 13.2 | 14.2 | 13.4 | 13.6 |
| 2022-06-19 6:00 PM  | 13.6 | 13.8 | 13.7 | 13.7 |
| 2022-06-19 7:00 PM  | 13.4 | 13.6 | 13.6 | 13.5 |
| 2022-06-19 8:00 PM  | 13.2 | 13.2 | 13.2 | 13.2 |
| 2022-06-19 9:00 PM  | 12.6 | 12.6 | 12.5 | 12.6 |
| 2022-06-19 10:00 PM | 11.7 | 11.7 | 11.4 | 11.6 |
| 2022-06-19 11:00 PM | 11.6 | 11.4 | 11.1 | 11.4 |
| 2022-06-20 12:00 AM | 11.5 | 11.3 | 11.0 | 11.3 |
| 2022-06-20 1:00 AM  | 11.6 | 11.6 | 11.2 | 11.5 |
| 2022-06-20 2:00 AM  | 11.6 | 11.5 | 11.1 | 11.4 |

|                     |      |      |      |      |
|---------------------|------|------|------|------|
| 2022-06-20 3:00 AM  | 11.5 | 11.5 | 11.1 | 11.4 |
| 2022-06-20 4:00 AM  | 11.6 | 11.7 | 11.1 | 11.5 |
| 2022-06-20 5:00 AM  | 11.3 | 11.5 | 10.9 | 11.2 |
| 2022-06-20 6:00 AM  | 11.1 | 11.4 | 10.7 | 11.1 |
| 2022-06-20 7:00 AM  | 11.4 | 11.6 | 11.0 | 11.3 |
| 2022-06-20 8:00 AM  | 12.2 | 12.1 | 11.5 | 11.9 |
| 2022-06-20 9:00 AM  | 12.3 | 12.1 | 11.6 | 12.0 |
| 2022-06-20 10:00 AM | 14.1 | 12.7 | 12.4 | 13.1 |
| 2022-06-20 11:00 AM | 15.5 | 13.5 | 14.1 | 14.4 |
| 2022-06-20 12:00 PM | 18.7 | 14.6 | 16.9 | 16.7 |
| 2022-06-20 1:00 PM  | 18.1 | 15.7 | 19.7 | 17.8 |
| 2022-06-20 2:00 PM  | 16.0 | 16.4 | 19.2 | 17.2 |
| 2022-06-20 3:00 PM  | 15.6 | 16.2 | 17.1 | 16.3 |
| 2022-06-20 4:00 PM  | 16.2 | 26.0 | 22.4 | 21.5 |
| 2022-06-20 5:00 PM  | 15.3 | 18.6 | 17.6 | 17.2 |
| 2022-06-20 6:00 PM  | 15.8 | 22.7 | 19.4 | 19.3 |
| 2022-06-20 7:00 PM  | 16.5 | 20.8 | 20.6 | 19.3 |
| 2022-06-20 8:00 PM  | 16.0 | 17.2 | 17.7 | 17.0 |
| 2022-06-20 9:00 PM  | 16.1 | 16.8 | 17.3 | 16.7 |
| 2022-06-20 10:00 PM | 15.9 | 16.4 | 16.9 | 16.4 |
| 2022-06-20 11:00 PM | 15.4 | 15.9 | 16.0 | 15.8 |
| 2022-06-21 12:00 AM | 15.1 | 15.6 | 15.5 | 15.4 |
| 2022-06-21 1:00 AM  | 15.0 | 15.4 | 15.3 | 15.2 |
| 2022-06-21 2:00 AM  | 15.1 | 15.5 | 15.2 | 15.3 |
| 2022-06-21 3:00 AM  | 16.4 | 17.2 | 17.3 | 17.0 |
| 2022-06-21 4:00 AM  | 16.3 | 16.8 | 17.1 | 16.7 |
| 2022-06-21 5:00 AM  | 16.2 | 16.6 | 16.9 | 16.6 |
| 2022-06-21 6:00 AM  | 16.1 | 16.4 | 16.6 | 16.4 |
| 2022-06-21 7:00 AM  | 16.4 | 16.7 | 16.8 | 16.6 |
| 2022-06-21 8:00 AM  | 16.3 | 16.5 | 16.7 | 16.5 |
| 2022-06-21 9:00 AM  | 16.3 | 16.1 | 16.0 | 16.1 |
| 2022-06-21 10:00 AM | 17.4 | 16.6 | 16.7 | 16.9 |
| 2022-06-21 11:00 AM | 17.9 | 17.1 | 17.5 | 17.5 |
| 2022-06-21 12:00 PM | 20.2 | 18.7 | 20.0 | 19.6 |
| 2022-06-21 1:00 PM  | 21.2 | 20.8 | 23.1 | 21.7 |
| 2022-06-21 2:00 PM  | 20.5 | 21.4 | 23.5 | 21.8 |
| 2022-06-21 3:00 PM  | 21.0 | 22.3 | 23.6 | 22.3 |
| 2022-06-21 4:00 PM  | 21.0 | 30.5 | 28.0 | 26.5 |
| 2022-06-21 5:00 PM  | 20.0 | 23.1 | 23.2 | 22.1 |
| 2022-06-21 6:00 PM  | 19.7 | 25.7 | 25.0 | 23.5 |
| 2022-06-21 7:00 PM  | 19.1 | 23.9 | 24.7 | 22.6 |
| 2022-06-21 8:00 PM  | 18.4 | 20.2 | 20.9 | 19.8 |
| 2022-06-21 9:00 PM  | 18.1 | 19.5 | 20.0 | 19.2 |

|                     |      |      |      |      |
|---------------------|------|------|------|------|
| 2022-06-21 10:00 PM | 17.9 | 19.1 | 19.3 | 18.8 |
| 2022-06-21 11:00 PM | 17.6 | 18.6 | 18.5 | 18.2 |
| 2022-06-22 12:00 AM | 17.2 | 18.1 | 17.7 | 17.7 |
| 2022-06-22 1:00 AM  | 17.0 | 17.7 | 17.3 | 17.3 |
| 2022-06-22 2:00 AM  | 16.7 | 17.5 | 16.9 | 17.0 |
| 2022-06-22 3:00 AM  | 16.6 | 17.3 | 16.8 | 16.9 |
| 2022-06-22 4:00 AM  | 16.3 | 16.9 | 16.4 | 16.5 |
| 2022-06-22 5:00 AM  | 15.5 | 16.1 | 15.2 | 15.6 |
| 2022-06-22 6:00 AM  | 15.2 | 15.7 | 14.7 | 15.2 |
| 2022-06-22 7:00 AM  | 15.1 | 15.6 | 14.5 | 15.1 |
| 2022-06-22 8:00 AM  | 15.5 | 15.7 | 14.9 | 15.4 |
| 2022-06-22 9:00 AM  | 15.5 | 15.4 | 14.7 | 15.2 |
| 2022-06-22 10:00 AM | 16.7 | 15.7 | 15.0 | 15.8 |
| 2022-06-22 11:00 AM | 18.1 | 17.0 | 16.9 | 17.3 |
| 2022-06-22 12:00 PM | 21.4 | 18.2 | 19.9 | 19.8 |
| 2022-06-22 1:00 PM  | 20.3 | 19.5 | 22.5 | 20.8 |
| 2022-06-22 2:00 PM  | 18.6 | 20.3 | 22.2 | 20.4 |
| 2022-06-22 3:00 PM  | 19.2 | 20.7 | 21.8 | 20.6 |
| 2022-06-22 4:00 PM  | 19.7 | 24.6 | 24.7 | 23.0 |
| 2022-06-22 5:00 PM  | 18.9 | 20.8 | 20.9 | 20.2 |
| 2022-06-22 6:00 PM  | 18.7 | 24.1 | 21.9 | 21.6 |
| 2022-06-22 7:00 PM  | 18.6 | 22.6 | 22.8 | 21.3 |
| 2022-06-22 8:00 PM  | 17.8 | 18.9 | 18.9 | 18.5 |
| 2022-06-22 9:00 PM  | 17.3 | 18.1 | 17.9 | 17.8 |
| 2022-06-22 10:00 PM | 16.7 | 17.6 | 17.0 | 17.1 |
| 2022-06-22 11:00 PM | 15.9 | 16.7 | 15.8 | 16.1 |
| 2022-06-23 12:00 AM | 15.3 | 16.1 | 14.9 | 15.4 |
| 2022-06-23 1:00 AM  | 14.9 | 15.5 | 14.3 | 14.9 |
| 2022-06-23 2:00 AM  | 14.4 | 14.9 | 13.5 | 14.3 |
| 2022-06-23 3:00 AM  | 14.1 | 14.5 | 13.0 | 13.9 |
| 2022-06-23 4:00 AM  | 13.5 | 14.0 | 12.4 | 13.3 |
| 2022-06-23 5:00 AM  | 13.2 | 13.6 | 12.1 | 13.0 |
| 2022-06-23 6:00 AM  | 13.1 | 13.4 | 12.0 | 12.8 |
| 2022-06-23 7:00 AM  | 13.0 | 13.3 | 11.8 | 12.7 |
| 2022-06-23 8:00 AM  | 13.8 | 14.0 | 12.6 | 13.5 |
| 2022-06-23 9:00 AM  | 14.3 | 14.5 | 13.4 | 14.1 |
| 2022-06-23 10:00 AM | 16.3 | 15.3 | 14.6 | 15.4 |
| 2022-06-23 11:00 AM | 17.6 | 16.3 | 16.7 | 16.9 |
| 2022-06-23 12:00 PM | 20.3 | 17.2 | 19.6 | 19.0 |
| 2022-06-23 1:00 PM  | 19.7 | 18.1 | 22.2 | 20.0 |
| 2022-06-23 2:00 PM  | 17.6 | 18.5 | 20.6 | 18.9 |
| 2022-06-23 3:00 PM  | 18.3 | 19.0 | 20.1 | 19.1 |
| 2022-06-23 4:00 PM  | 19.0 | 25.5 | 24.8 | 23.1 |

|                     |      |      |      |      |
|---------------------|------|------|------|------|
| 2022-06-23 5:00 PM  | 19.0 | 21.3 | 21.9 | 20.7 |
| 2022-06-23 6:00 PM  | 18.6 | 21.6 | 21.4 | 20.5 |
| 2022-06-23 7:00 PM  | 18.5 | 19.8 | 20.8 | 19.7 |
| 2022-06-23 8:00 PM  | 18.8 | 19.3 | 20.0 | 19.4 |
| 2022-06-23 9:00 PM  | 18.2 | 18.6 | 19.0 | 18.6 |
| 2022-06-23 10:00 PM | 17.9 | 18.2 | 18.3 | 18.1 |
| 2022-06-23 11:00 PM | 17.5 | 17.8 | 17.7 | 17.7 |
| 2022-06-24 12:00 AM | 17.0 | 17.3 | 16.9 | 17.1 |
| 2022-06-24 1:00 AM  | 16.1 | 16.3 | 15.7 | 16.0 |
| 2022-06-24 2:00 AM  | 15.9 | 16.2 | 15.3 | 15.8 |
| 2022-06-24 3:00 AM  | 15.6 | 15.9 | 15.0 | 15.5 |
| 2022-06-24 4:00 AM  | 14.5 | 14.7 | 13.5 | 14.2 |
| 2022-06-24 5:00 AM  | 14.2 | 14.4 | 13.2 | 13.9 |
| 2022-06-24 6:00 AM  | 14.1 | 14.2 | 12.9 | 13.7 |
| 2022-06-24 7:00 AM  | 14.2 | 14.4 | 13.0 | 13.9 |
| 2022-06-24 8:00 AM  | 14.9 | 15.0 | 13.9 | 14.6 |
| 2022-06-24 9:00 AM  | 16.1 | 16.1 | 15.5 | 15.9 |
| 2022-06-24 10:00 AM | 17.3 | 16.4 | 16.2 | 16.6 |
| 2022-06-24 11:00 AM | 18.2 | 16.9 | 17.3 | 17.5 |
| 2022-06-24 12:00 PM | 20.3 | 17.6 | 19.5 | 19.1 |
| 2022-06-24 1:00 PM  | 20.1 | 18.5 | 22.0 | 20.2 |
| 2022-06-24 2:00 PM  | 18.4 | 18.8 | 21.1 | 19.4 |
| 2022-06-24 3:00 PM  | 18.8 | 19.2 | 20.1 | 19.4 |
| 2022-06-24 4:00 PM  | 18.6 | 22.6 | 22.6 | 21.3 |
| 2022-06-24 5:00 PM  | 17.8 | 19.4 | 19.0 | 18.7 |
| 2022-06-24 6:00 PM  | 17.7 | 20.2 | 19.0 | 19.0 |
| 2022-06-24 7:00 PM  | 17.6 | 19.5 | 19.4 | 18.8 |
| 2022-06-24 8:00 PM  | 17.4 | 18.0 | 17.9 | 17.8 |
| 2022-06-24 9:00 PM  | 17.2 | 17.7 | 17.5 | 17.5 |
| 2022-06-24 10:00 PM | 16.8 | 17.2 | 16.8 | 16.9 |
| 2022-06-24 11:00 PM | 16.4 | 16.8 | 16.1 | 16.4 |
| 2022-06-25 12:00 AM | 16.1 | 16.4 | 15.6 | 16.0 |
| 2022-06-25 1:00 AM  | 15.7 | 16.1 | 15.2 | 15.7 |
| 2022-06-25 2:00 AM  | 15.6 | 16.0 | 15.0 | 15.5 |
| 2022-06-25 3:00 AM  | 15.8 | 16.1 | 15.2 | 15.7 |
| 2022-06-25 4:00 AM  | 15.8 | 16.0 | 15.3 | 15.7 |
| 2022-06-25 5:00 AM  | 15.5 | 15.6 | 14.9 | 15.3 |
| 2022-06-25 6:00 AM  | 15.3 | 15.4 | 14.5 | 15.1 |
| 2022-06-25 7:00 AM  | 15.1 | 15.2 | 14.3 | 14.9 |
| 2022-06-25 8:00 AM  | 15.2 | 15.1 | 14.3 | 14.9 |
| 2022-06-25 9:00 AM  | 15.6 | 15.3 | 14.6 | 15.2 |
| 2022-06-25 10:00 AM | 15.9 | 15.6 | 15.2 | 15.6 |
| 2022-06-25 11:00 AM | 16.1 | 15.9 | 15.6 | 15.9 |

|                     |      |      |      |      |
|---------------------|------|------|------|------|
| 2022-06-25 12:00 PM | 15.9 | 15.8 | 15.5 | 15.7 |
| 2022-06-25 1:00 PM  | 16.0 | 15.8 | 15.5 | 15.8 |
| 2022-06-25 2:00 PM  | 16.6 | 16.3 | 16.2 | 16.4 |
| 2022-06-25 3:00 PM  | 17.1 | 17.1 | 17.3 | 17.2 |
| 2022-06-25 4:00 PM  | 17.4 | 21.0 | 20.2 | 19.5 |
| 2022-06-25 5:00 PM  | 17.2 | 17.8 | 18.0 | 17.7 |
| 2022-06-25 6:00 PM  | 17.2 | 18.5 | 18.0 | 17.9 |
| 2022-06-25 7:00 PM  | 16.8 | 17.3 | 17.4 | 17.2 |
| 2022-06-25 8:00 PM  | 16.6 | 16.6 | 16.6 | 16.6 |
| 2022-06-25 9:00 PM  | 16.4 | 16.5 | 16.3 | 16.4 |
| 2022-06-25 10:00 PM | 15.8 | 16.0 | 15.5 | 15.8 |
| 2022-06-25 11:00 PM | 15.2 | 15.5 | 14.7 | 15.1 |
| 2022-06-26 12:00 AM | 14.8 | 15.1 | 14.1 | 14.7 |
| 2022-06-26 1:00 AM  | 14.6 | 14.9 | 13.9 | 14.5 |
| 2022-06-26 2:00 AM  | 14.6 | 14.9 | 13.9 | 14.5 |
| 2022-06-26 3:00 AM  | 14.7 | 15.1 | 14.1 | 14.6 |
| 2022-06-26 4:00 AM  | 14.3 | 14.8 | 13.6 | 14.2 |
| 2022-06-26 5:00 AM  | 13.9 | 14.5 | 13.1 | 13.8 |
| 2022-06-26 6:00 AM  | 13.3 | 13.8 | 12.5 | 13.2 |
| 2022-06-26 7:00 AM  | 13.1 | 13.4 | 12.1 | 12.9 |
| 2022-06-26 8:00 AM  | 13.6 | 14.0 | 12.7 | 13.4 |
| 2022-06-26 9:00 AM  | 14.5 | 14.6 | 13.9 | 14.3 |
| 2022-06-26 10:00 AM | 15.7 | 14.9 | 14.4 | 15.0 |
| 2022-06-26 11:00 AM | 16.6 | 15.6 | 15.7 | 16.0 |
| 2022-06-26 12:00 PM | 17.3 | 16.0 | 16.5 | 16.6 |
| 2022-06-26 1:00 PM  | 17.2 | 16.4 | 17.0 | 16.9 |
| 2022-06-26 2:00 PM  | 17.1 | 16.5 | 17.0 | 16.9 |
| 2022-06-26 3:00 PM  | 17.2 | 16.8 | 17.3 | 17.1 |
| 2022-06-26 4:00 PM  | 16.6 | 19.4 | 18.5 | 18.2 |
| 2022-06-26 5:00 PM  | 16.3 | 17.3 | 16.9 | 16.8 |
| 2022-06-26 6:00 PM  | 16.1 | 17.3 | 17.0 | 16.8 |
| 2022-06-26 7:00 PM  | 15.5 | 15.7 | 15.5 | 15.6 |
| 2022-06-26 8:00 PM  | 15.3 | 15.0 | 14.8 | 15.0 |
| 2022-06-26 9:00 PM  | 14.7 | 14.4 | 14.0 | 14.4 |
| 2022-06-26 10:00 PM | 14.1 | 13.9 | 13.2 | 13.7 |
| 2022-06-26 11:00 PM | 13.5 | 13.5 | 12.5 | 13.2 |
| 2022-06-27 12:00 AM | 13.3 | 13.3 | 12.3 | 13.0 |
| 2022-06-27 1:00 AM  | 13.2 | 13.0 | 12.1 | 12.8 |
| 2022-06-27 2:00 AM  | 13.2 | 13.1 | 12.2 | 12.8 |
| 2022-06-27 3:00 AM  | 13.0 | 12.8 | 11.9 | 12.6 |
| 2022-06-27 4:00 AM  | 12.8 | 12.6 | 11.6 | 12.3 |
| 2022-06-27 5:00 AM  | 12.5 | 12.6 | 11.4 | 12.2 |
| 2022-06-27 6:00 AM  | 12.0 | 12.2 | 10.8 | 11.7 |

|                     |      |      |      |      |
|---------------------|------|------|------|------|
| 2022-06-27 7:00 AM  | 11.3 | 11.6 | 10.0 | 11.0 |
| 2022-06-27 8:00 AM  | 11.6 | 12.0 | 10.5 | 11.4 |
| 2022-06-27 9:00 AM  | 12.6 | 12.8 | 11.6 | 12.3 |
| 2022-06-27 10:00 AM | 14.7 | 13.6 | 12.7 | 13.7 |
| 2022-06-27 11:00 AM | 16.0 | 14.8 | 14.9 | 15.2 |
| 2022-06-27 12:00 PM | 18.2 | 15.8 | 17.7 | 17.2 |
| 2022-06-27 1:00 PM  | 18.0 | 16.7 | 20.2 | 18.3 |
| 2022-06-27 2:00 PM  | 16.1 | 16.5 | 17.7 | 16.8 |
| 2022-06-27 3:00 PM  | 16.8 | 17.3 | 17.8 | 17.3 |
| 2022-06-27 4:00 PM  | 16.8 | 19.3 | 19.4 | 18.5 |
| 2022-06-27 5:00 PM  | 16.3 | 17.7 | 17.7 | 17.2 |
| 2022-06-27 6:00 PM  | 16.4 | 18.8 | 18.2 | 17.8 |
| 2022-06-27 7:00 PM  | 16.5 | 17.8 | 17.8 | 17.4 |
| 2022-06-27 8:00 PM  | 16.3 | 16.8 | 16.9 | 16.7 |
| 2022-06-27 9:00 PM  | 16.0 | 16.4 | 16.3 | 16.2 |
| 2022-06-27 10:00 PM | 15.3 | 15.7 | 15.4 | 15.5 |
| 2022-06-27 11:00 PM | 14.3 | 14.6 | 13.8 | 14.2 |
| 2022-06-28 12:00 AM | 13.8 | 14.1 | 12.9 | 13.6 |
| 2022-06-28 1:00 AM  | 13.8 | 14.0 | 12.9 | 13.6 |
| 2022-06-28 2:00 AM  | 14.7 | 15.0 | 14.2 | 14.6 |
| 2022-06-28 3:00 AM  | 14.9 | 15.2 | 14.6 | 14.9 |
| 2022-06-28 4:00 AM  | 15.1 | 15.3 | 14.9 | 15.1 |
| 2022-06-28 5:00 AM  | 15.0 | 15.3 | 14.7 | 15.0 |
| 2022-06-28 6:00 AM  | 14.8 | 15.1 | 14.4 | 14.8 |
| 2022-06-28 7:00 AM  | 14.8 | 15.1 | 14.3 | 14.7 |
| 2022-06-28 8:00 AM  | 15.0 | 15.2 | 14.6 | 14.9 |
| 2022-06-28 9:00 AM  | 15.1 | 15.2 | 14.7 | 15.0 |
| 2022-06-28 10:00 AM | 16.5 | 15.9 | 15.7 | 16.0 |
| 2022-06-28 11:00 AM | 17.4 | 16.6 | 16.9 | 17.0 |
| 2022-06-28 12:00 PM | 17.2 | 16.3 | 16.7 | 16.7 |
| 2022-06-28 1:00 PM  | 17.0 | 16.1 | 16.4 | 16.5 |
| 2022-06-28 2:00 PM  | 16.4 | 15.8 | 15.9 | 16.0 |
| 2022-06-28 3:00 PM  | 17.3 | 17.0 | 17.6 | 17.3 |
| 2022-06-28 4:00 PM  | 17.3 | 21.3 | 21.6 | 20.1 |
| 2022-06-28 5:00 PM  | 16.8 | 18.0 | 18.1 | 17.6 |
| 2022-06-28 6:00 PM  | 16.8 | 20.9 | 19.9 | 19.2 |
| 2022-06-28 7:00 PM  | 16.4 | 19.3 | 19.4 | 18.4 |
| 2022-06-28 8:00 PM  | 15.8 | 16.5 | 16.3 | 16.2 |
| 2022-06-28 9:00 PM  | 15.3 | 15.8 | 15.4 | 15.5 |
| 2022-06-28 10:00 PM | 14.8 | 15.3 | 14.6 | 14.9 |
| 2022-06-28 11:00 PM | 13.9 | 14.5 | 13.1 | 13.8 |
| 2022-06-29 12:00 AM | 13.2 | 13.6 | 12.2 | 13.0 |
| 2022-06-29 1:00 AM  | 12.7 | 12.8 | 11.6 | 12.4 |

|                     |      |      |      |      |
|---------------------|------|------|------|------|
| 2022-06-29 2:00 AM  | 12.0 | 12.3 | 10.8 | 11.7 |
| 2022-06-29 3:00 AM  | 11.5 | 11.9 | 10.1 | 11.2 |
| 2022-06-29 4:00 AM  | 11.3 | 11.6 | 9.8  | 10.9 |
| 2022-06-29 5:00 AM  | 10.8 | 11.3 | 9.3  | 10.5 |
| 2022-06-29 6:00 AM  | 10.5 | 10.8 | 8.9  | 10.1 |
| 2022-06-29 7:00 AM  | 10.0 | 10.4 | 8.3  | 9.6  |
| 2022-06-29 8:00 AM  | 10.6 | 10.9 | 9.0  | 10.2 |
| 2022-06-29 9:00 AM  | 12.4 | 12.6 | 11.2 | 12.1 |
| 2022-06-29 10:00 AM | 14.8 | 13.7 | 13.0 | 13.8 |
| 2022-06-29 11:00 AM | 16.2 | 15.1 | 15.7 | 15.7 |
| 2022-06-29 12:00 PM | 18.5 | 16.2 | 18.6 | 17.8 |
| 2022-06-29 1:00 PM  | 17.8 | 16.6 | 19.1 | 17.8 |
| 2022-06-29 2:00 PM  | 16.2 | 16.2 | 17.6 | 16.7 |
| 2022-06-29 3:00 PM  | 15.8 | 15.9 | 15.8 | 15.8 |
| 2022-06-29 4:00 PM  | 16.3 | 16.7 | 16.9 | 16.6 |
| 2022-06-29 5:00 PM  | 16.1 | 16.0 | 16.5 | 16.2 |
| 2022-06-29 6:00 PM  | 15.8 | 15.6 | 15.6 | 15.7 |
| 2022-06-29 7:00 PM  | 15.5 | 15.2 | 15.0 | 15.2 |
| 2022-06-29 8:00 PM  | 14.8 | 14.6 | 14.2 | 14.5 |
| 2022-06-29 9:00 PM  | 14.2 | 14.1 | 13.2 | 13.8 |
| 2022-06-29 10:00 PM | 13.6 | 13.6 | 12.8 | 13.3 |
| 2022-06-29 11:00 PM | 13.4 | 13.5 | 12.6 | 13.2 |
| 2022-06-30 12:00 AM | 13.3 | 13.3 | 12.5 | 13.0 |
| 2022-06-30 1:00 AM  | 13.0 | 13.0 | 12.2 | 12.7 |
| 2022-06-30 2:00 AM  | 12.8 | 12.4 | 11.7 | 12.3 |
| 2022-06-30 3:00 AM  | 12.9 | 12.7 | 11.9 | 12.5 |
| 2022-06-30 4:00 AM  | 12.9 | 12.9 | 12.1 | 12.6 |
| 2022-06-30 5:00 AM  | 13.1 | 13.1 | 12.4 | 12.9 |
| 2022-06-30 6:00 AM  | 13.1 | 13.1 | 12.4 | 12.9 |
| 2022-06-30 7:00 AM  | 13.2 | 13.3 | 12.6 | 13.0 |
| 2022-06-30 8:00 AM  | 13.6 | 13.5 | 12.9 | 13.3 |
| 2022-06-30 9:00 AM  | 13.7 | 13.7 | 13.2 | 13.5 |
| 2022-06-30 10:00 AM | 14.0 | 14.0 | 13.4 | 13.8 |
| 2022-06-30 11:00 AM | 16.2 | 15.1 | 14.2 | 15.2 |
| 2022-06-30 12:00 PM | 17.8 | 16.9 | 17.9 | 17.5 |
| 2022-06-30 1:00 PM  | 17.4 | 16.8 | 19.3 | 17.8 |
| 2022-06-30 2:00 PM  | 16.5 | 17.0 | 18.7 | 17.4 |
| 2022-06-30 3:00 PM  | 16.5 | 16.8 | 17.7 | 17.0 |
| 2022-06-30 4:00 PM  | 17.2 | 20.9 | 21.6 | 19.9 |
| 2022-06-30 5:00 PM  | 17.5 | 19.2 | 20.4 | 19.0 |
| 2022-06-30 6:00 PM  | 18.0 | 21.4 | 22.2 | 20.5 |
| 2022-06-30 7:00 PM  | 17.8 | 20.8 | 22.1 | 20.2 |
| 2022-06-30 8:00 PM  | 17.4 | 18.8 | 19.4 | 18.5 |



|                     |      |      |      |      |
|---------------------|------|------|------|------|
| 2022-06-30 9:00 PM  | 17.0 | 18.1 | 18.4 | 17.8 |
| 2022-06-30 10:00 PM | 16.6 | 17.4 | 17.4 | 17.1 |
| 2022-06-30 11:00 PM | 16.1 | 16.7 | 16.3 | 16.4 |
| 2022-07-01 12:00 AM | 15.6 | 16.2 | 15.5 | 15.8 |
| 2022-07-01 1:00 AM  | 15.5 | 15.8 | 15.2 | 15.5 |
| 2022-07-01 2:00 AM  | 15.0 | 15.5 | 14.6 | 15.0 |
| 2022-07-01 3:00 AM  | 14.4 | 14.7 | 13.6 | 14.2 |
| 2022-07-01 4:00 AM  | 13.8 | 14.1 | 12.8 | 13.6 |
| 2022-07-01 5:00 AM  | 13.2 | 13.2 | 12.0 | 12.8 |
| 2022-07-01 6:00 AM  | 12.8 | 13.0 | 11.6 | 12.5 |
| 2022-07-01 7:00 AM  | 12.6 | 12.8 | 11.5 | 12.3 |
| 2022-07-01 8:00 AM  | 12.7 | 12.9 | 11.6 | 12.4 |
| 2022-07-01 9:00 AM  | 13.8 | 13.9 | 12.7 | 13.5 |
| 2022-07-01 10:00 AM | 15.3 | 14.8 | 14.0 | 14.7 |
| 2022-07-01 11:00 AM | 16.0 | 15.8 | 15.7 | 15.8 |
| 2022-07-01 12:00 PM | 16.8 | 16.6 | 17.8 | 17.1 |
| 2022-07-01 1:00 PM  | 16.4 | 16.7 | 17.7 | 16.9 |
| 2022-07-01 2:00 PM  | 16.3 | 16.7 | 17.3 | 16.8 |
| 2022-07-01 3:00 PM  | 16.4 | 17.1 | 17.4 | 17.0 |
| 2022-07-01 4:00 PM  | 17.0 | 21.9 | 23.1 | 20.7 |
| 2022-07-01 5:00 PM  | 16.5 | 18.5 | 19.0 | 18.0 |
| 2022-07-01 6:00 PM  | 16.7 | 20.0 | 19.6 | 18.8 |
| 2022-07-01 7:00 PM  | 16.5 | 19.0 | 19.5 | 18.3 |
| 2022-07-01 8:00 PM  | 16.1 | 17.1 | 17.3 | 16.8 |
| 2022-07-01 9:00 PM  | 15.8 | 16.7 | 16.6 | 16.4 |
| 2022-07-01 10:00 PM | 15.5 | 16.2 | 15.9 | 15.9 |
| 2022-07-01 11:00 PM | 15.0 | 15.7 | 15.1 | 15.3 |
| 2022-07-02 12:00 AM | 14.5 | 15.1 | 14.2 | 14.6 |
| 2022-07-02 1:00 AM  | 14.1 | 14.7 | 13.7 | 14.2 |
| 2022-07-02 2:00 AM  | 13.5 | 14.0 | 13.0 | 13.5 |
| 2022-07-02 3:00 AM  | 12.9 | 13.3 | 12.2 | 12.8 |
| 2022-07-02 4:00 AM  | 12.5 | 12.9 | 11.7 | 12.4 |
| 2022-07-02 5:00 AM  | 12.1 | 12.5 | 11.2 | 11.9 |
| 2022-07-02 6:00 AM  | 11.9 | 12.4 | 10.9 | 11.7 |
| 2022-07-02 7:00 AM  | 11.6 | 12.0 | 10.6 | 11.4 |
| 2022-07-02 8:00 AM  | 11.9 | 12.3 | 10.9 | 11.7 |
| 2022-07-02 9:00 AM  | 12.9 | 13.2 | 12.0 | 12.7 |
| 2022-07-02 10:00 AM | 14.7 | 14.1 | 13.3 | 14.0 |
| 2022-07-02 11:00 AM | 15.7 | 15.5 | 15.6 | 15.6 |
| 2022-07-02 12:00 PM | 17.5 | 16.7 | 18.2 | 17.5 |
| 2022-07-02 1:00 PM  | 17.3 | 18.0 | 20.8 | 18.7 |
| 2022-07-02 2:00 PM  | 16.7 | 18.1 | 19.7 | 18.2 |
| 2022-07-02 3:00 PM  | 17.0 | 17.9 | 18.5 | 17.8 |

|                     |      |      |      |      |
|---------------------|------|------|------|------|
| 2022-07-02 4:00 PM  | 16.9 | 17.5 | 17.9 | 17.4 |
| 2022-07-02 5:00 PM  | 16.6 | 17.3 | 17.5 | 17.1 |
| 2022-07-02 6:00 PM  | 16.6 | 19.7 | 18.9 | 18.4 |
| 2022-07-02 7:00 PM  | 16.5 | 19.3 | 19.6 | 18.5 |
| 2022-07-02 8:00 PM  | 16.0 | 16.8 | 16.7 | 16.5 |
| 2022-07-02 9:00 PM  | 15.7 | 16.3 | 15.9 | 16.0 |
| 2022-07-02 10:00 PM | 15.3 | 15.9 | 15.3 | 15.5 |
| 2022-07-02 11:00 PM | 14.8 | 15.3 | 14.4 | 14.8 |
| 2022-07-03 12:00 AM | 14.3 | 14.8 | 13.7 | 14.3 |
| 2022-07-03 1:00 AM  | 14.0 | 14.4 | 13.3 | 13.9 |
| 2022-07-03 2:00 AM  | 13.3 | 13.7 | 12.5 | 13.2 |
| 2022-07-03 3:00 AM  | 12.9 | 13.3 | 12.1 | 12.8 |
| 2022-07-03 4:00 AM  | 12.5 | 12.8 | 11.7 | 12.3 |
| 2022-07-03 5:00 AM  | 12.3 | 12.5 | 11.3 | 12.0 |
| 2022-07-03 6:00 AM  | 12.1 | 12.3 | 11.1 | 11.8 |
| 2022-07-03 7:00 AM  | 12.4 | 12.6 | 11.6 | 12.2 |
| 2022-07-03 8:00 AM  | 13.1 | 13.3 | 12.3 | 12.9 |
| 2022-07-03 9:00 AM  | 14.1 | 14.1 | 13.3 | 13.8 |
| 2022-07-03 10:00 AM | 15.2 | 14.9 | 14.6 | 14.9 |
| 2022-07-03 11:00 AM | 16.1 | 16.1 | 16.4 | 16.2 |
| 2022-07-03 12:00 PM | 17.4 | 17.0 | 18.6 | 17.7 |
| 2022-07-03 1:00 PM  | 17.5 | 18.1 | 21.6 | 19.1 |
| 2022-07-03 2:00 PM  | 16.4 | 17.8 | 19.6 | 17.9 |
| 2022-07-03 3:00 PM  | 16.3 | 17.1 | 17.6 | 17.0 |
| 2022-07-03 4:00 PM  | 16.7 | 21.7 | 21.5 | 20.0 |
| 2022-07-03 5:00 PM  | 16.5 | 18.4 | 18.2 | 17.7 |
| 2022-07-03 6:00 PM  | 16.3 | 17.2 | 17.1 | 16.9 |
| 2022-07-03 7:00 PM  | 16.2 | 16.8 | 16.8 | 16.6 |
| 2022-07-03 8:00 PM  | 16.1 | 16.6 | 16.4 | 16.4 |
| 2022-07-03 9:00 PM  | 15.9 | 16.3 | 16.1 | 16.1 |
| 2022-07-03 10:00 PM | 15.2 | 15.4 | 15.1 | 15.2 |
| 2022-07-03 11:00 PM | 15.0 | 15.1 | 14.6 | 14.9 |
| 2022-07-04 12:00 AM | 14.3 | 14.5 | 13.9 | 14.2 |
| 2022-07-04 1:00 AM  | 13.8 | 14.0 | 13.2 | 13.7 |
| 2022-07-04 2:00 AM  | 13.5 | 13.6 | 12.8 | 13.3 |
| 2022-07-04 3:00 AM  | 13.2 | 13.3 | 12.4 | 13.0 |
| 2022-07-04 4:00 AM  | 12.9 | 13.0 | 12.1 | 12.7 |
| 2022-07-04 5:00 AM  | 12.8 | 12.8 | 11.9 | 12.5 |
| 2022-07-04 6:00 AM  | 12.6 | 12.7 | 11.8 | 12.4 |
| 2022-07-04 7:00 AM  | 12.8 | 12.7 | 11.9 | 12.5 |
| 2022-07-04 8:00 AM  | 13.5 | 13.6 | 12.7 | 13.3 |
| 2022-07-04 9:00 AM  | 14.1 | 14.0 | 13.3 | 13.8 |
| 2022-07-04 10:00 AM | 14.6 | 14.1 | 13.8 | 14.2 |

|                     |      |      |      |      |
|---------------------|------|------|------|------|
| 2022-07-04 11:00 AM | 14.8 | 14.4 | 14.3 | 14.5 |
| 2022-07-04 12:00 PM | 14.7 | 14.6 | 14.5 | 14.6 |
| 2022-07-04 1:00 PM  | 15.4 | 15.6 | 16.0 | 15.7 |
| 2022-07-04 2:00 PM  | 15.4 | 15.7 | 16.0 | 15.7 |
| 2022-07-04 3:00 PM  | 14.9 | 15.1 | 15.1 | 15.0 |
| 2022-07-04 4:00 PM  | 14.6 | 14.6 | 14.4 | 14.5 |
| 2022-07-04 5:00 PM  | 14.9 | 14.9 | 14.7 | 14.8 |
| 2022-07-04 6:00 PM  | 15.1 | 15.1 | 15.1 | 15.1 |
| 2022-07-04 7:00 PM  | 14.9 | 14.9 | 14.8 | 14.9 |
| 2022-07-04 8:00 PM  | 14.8 | 14.7 | 14.5 | 14.7 |
| 2022-07-04 9:00 PM  | 14.4 | 14.4 | 14.0 | 14.3 |
| 2022-07-04 10:00 PM | 14.4 | 14.4 | 13.9 | 14.2 |
| 2022-07-04 11:00 PM | 14.5 | 14.4 | 14.0 | 14.3 |
| 2022-07-05 12:00 AM | 14.3 | 14.3 | 13.8 | 14.1 |
| 2022-07-05 1:00 AM  | 14.4 | 14.4 | 13.9 | 14.2 |
| 2022-07-05 2:00 AM  | 14.6 | 14.6 | 14.2 | 14.5 |
| 2022-07-05 3:00 AM  | 14.6 | 14.7 | 14.3 | 14.5 |
| 2022-07-05 4:00 AM  | 14.6 | 14.7 | 14.3 | 14.5 |
| 2022-07-05 5:00 AM  | 14.6 | 14.7 | 14.3 | 14.5 |
| 2022-07-05 6:00 AM  | 14.6 | 14.7 | 14.3 | 14.5 |
| 2022-07-05 7:00 AM  | 14.6 | 14.7 | 14.3 | 14.5 |
| 2022-07-05 8:00 AM  | 14.6 | 14.7 | 14.3 | 14.5 |
| 2022-07-05 9:00 AM  | 14.5 | 14.6 | 14.2 | 14.4 |
| 2022-07-05 10:00 AM | 14.7 | 14.7 | 14.3 | 14.6 |
| 2022-07-05 11:00 AM | 14.8 | 14.9 | 14.6 | 14.8 |
| 2022-07-05 12:00 PM | 14.9 | 15.0 | 14.8 | 14.9 |
| 2022-07-05 1:00 PM  | 15.2 | 15.5 | 15.5 | 15.4 |
| 2022-07-05 2:00 PM  | 15.7 | 16.2 | 16.6 | 16.2 |
| 2022-07-05 3:00 PM  | 15.9 | 16.6 | 17.0 | 16.5 |
| 2022-07-05 4:00 PM  | 16.3 | 17.4 | 17.7 | 17.1 |
| 2022-07-05 5:00 PM  | 16.6 | 18.1 | 18.4 | 17.7 |
| 2022-07-05 6:00 PM  | 16.7 | 18.0 | 18.4 | 17.7 |
| 2022-07-05 7:00 PM  | 16.5 | 18.1 | 18.6 | 17.7 |
| 2022-07-05 8:00 PM  | 16.1 | 16.9 | 17.0 | 16.7 |
| 2022-07-05 9:00 PM  | 16.0 | 16.6 | 16.6 | 16.4 |
| 2022-07-05 10:00 PM | 15.8 | 16.3 | 16.1 | 16.1 |
| 2022-07-05 11:00 PM | 15.4 | 15.8 | 15.3 | 15.5 |
| 2022-07-06 12:00 AM | 14.9 | 15.3 | 14.5 | 14.9 |
| 2022-07-06 1:00 AM  | 14.4 | 14.7 | 13.8 | 14.3 |
| 2022-07-06 2:00 AM  | 14.1 | 14.4 | 13.4 | 14.0 |
| 2022-07-06 3:00 AM  | 13.8 | 14.1 | 13.1 | 13.7 |
| 2022-07-06 4:00 AM  | 13.4 | 13.7 | 12.7 | 13.3 |
| 2022-07-06 5:00 AM  | 13.1 | 13.3 | 12.4 | 12.9 |

|                     |      |      |      |      |
|---------------------|------|------|------|------|
| 2022-07-06 6:00 AM  | 12.8 | 13.1 | 12.1 | 12.7 |
| 2022-07-06 7:00 AM  | 12.6 | 12.8 | 11.7 | 12.4 |
| 2022-07-06 8:00 AM  | 12.9 | 13.1 | 12.0 | 12.7 |
| 2022-07-06 9:00 AM  | 13.8 | 14.1 | 13.1 | 13.7 |
| 2022-07-06 10:00 AM | 15.1 | 14.9 | 14.6 | 14.9 |
| 2022-07-06 11:00 AM | 16.2 | 16.1 | 16.5 | 16.3 |
| 2022-07-06 12:00 PM | 17.8 | 16.9 | 18.6 | 17.8 |
| 2022-07-06 1:00 PM  | 17.6 | 17.3 | 20.3 | 18.4 |
| 2022-07-06 2:00 PM  | 16.3 | 17.2 | 18.7 | 17.4 |
| 2022-07-06 3:00 PM  | 16.2 | 16.6 | 17.0 | 16.6 |
| 2022-07-06 4:00 PM  | 16.5 | 21.2 | 21.3 | 19.7 |
| 2022-07-06 5:00 PM  | 15.9 | 17.5 | 17.4 | 16.9 |
| 2022-07-06 6:00 PM  | 15.8 | 17.5 | 16.8 | 16.7 |
| 2022-07-06 7:00 PM  | 15.9 | 18.0 | 17.8 | 17.2 |
| 2022-07-06 8:00 PM  | 15.6 | 16.3 | 16.0 | 16.0 |
| 2022-07-06 9:00 PM  | 15.5 | 16.0 | 15.6 | 15.7 |
| 2022-07-06 10:00 PM | 15.1 | 15.6 | 15.0 | 15.2 |
| 2022-07-06 11:00 PM | 14.4 | 14.8 | 13.9 | 14.4 |
| 2022-07-07 12:00 AM | 13.9 | 14.1 | 13.3 | 13.8 |
| 2022-07-07 1:00 AM  | 13.6 | 13.8 | 12.8 | 13.4 |
| 2022-07-07 2:00 AM  | 13.3 | 13.4 | 12.4 | 13.0 |
| 2022-07-07 3:00 AM  | 13.0 | 13.1 | 12.1 | 12.7 |
| 2022-07-07 4:00 AM  | 12.6 | 12.7 | 11.7 | 12.3 |
| 2022-07-07 5:00 AM  | 12.2 | 12.5 | 11.3 | 12.0 |
| 2022-07-07 6:00 AM  | 12.2 | 12.3 | 11.2 | 11.9 |
| 2022-07-07 7:00 AM  | 12.5 | 12.6 | 11.5 | 12.2 |
| 2022-07-07 8:00 AM  | 13.0 | 13.1 | 12.1 | 12.7 |
| 2022-07-07 9:00 AM  | 13.7 | 13.6 | 12.9 | 13.4 |
| 2022-07-07 10:00 AM | 14.7 | 14.5 | 14.1 | 14.4 |
| 2022-07-07 11:00 AM | 15.8 | 15.7 | 16.0 | 15.8 |
| 2022-07-07 12:00 PM | 17.6 | 17.1 | 18.7 | 17.8 |
| 2022-07-07 1:00 PM  | 18.0 | 18.4 | 21.2 | 19.2 |
| 2022-07-07 2:00 PM  | 17.3 | 18.9 | 20.2 | 18.8 |
| 2022-07-07 3:00 PM  | 17.5 | 18.6 | 19.9 | 18.7 |
| 2022-07-07 4:00 PM  | 17.5 | 21.4 | 22.4 | 20.4 |
| 2022-07-07 5:00 PM  | 17.0 | 18.8 | 19.3 | 18.4 |
| 2022-07-07 6:00 PM  | 17.1 | 18.3 | 18.4 | 17.9 |
| 2022-07-07 7:00 PM  | 17.2 | 18.4 | 18.8 | 18.1 |
| 2022-07-07 8:00 PM  | 16.9 | 17.6 | 17.8 | 17.4 |
| 2022-07-07 9:00 PM  | 16.7 | 17.3 | 17.5 | 17.2 |
| 2022-07-07 10:00 PM | 16.5 | 17.0 | 16.9 | 16.8 |
| 2022-07-07 11:00 PM | 16.2 | 16.6 | 16.3 | 16.4 |
| 2022-07-08 12:00 AM | 16.0 | 16.3 | 15.8 | 16.0 |

|                     |      |      |      |      |
|---------------------|------|------|------|------|
| 2022-07-08 1:00 AM  | 15.7 | 16.0 | 15.4 | 15.7 |
| 2022-07-08 2:00 AM  | 15.2 | 15.7 | 14.8 | 15.2 |
| 2022-07-08 3:00 AM  | 14.8 | 15.2 | 14.2 | 14.7 |
| 2022-07-08 4:00 AM  | 14.3 | 14.5 | 13.5 | 14.1 |
| 2022-07-08 5:00 AM  | 13.9 | 14.1 | 13.0 | 13.7 |
| 2022-07-08 6:00 AM  | 13.3 | 13.5 | 12.3 | 13.0 |
| 2022-07-08 7:00 AM  | 12.9 | 13.1 | 12.0 | 12.7 |
| 2022-07-08 8:00 AM  | 13.3 | 13.6 | 12.4 | 13.1 |
| 2022-07-08 9:00 AM  | 14.4 | 14.6 | 13.6 | 14.2 |
| 2022-07-08 10:00 AM | 15.7 | 15.6 | 15.2 | 15.5 |
| 2022-07-08 11:00 AM | 16.9 | 16.8 | 17.2 | 17.0 |
| 2022-07-08 12:00 PM | 18.3 | 17.8 | 19.3 | 18.5 |
| 2022-07-08 1:00 PM  | 18.9 | 18.7 | 21.5 | 19.7 |
| 2022-07-08 2:00 PM  | 17.5 | 18.4 | 19.6 | 18.5 |
| 2022-07-08 3:00 PM  | 17.3 | 18.0 | 18.7 | 18.0 |
| 2022-07-08 4:00 PM  | 17.6 | 22.5 | 22.7 | 20.9 |
| 2022-07-08 5:00 PM  | 17.9 | 19.3 | 19.0 | 18.7 |
| 2022-07-08 6:00 PM  | 19.0 | 18.7 | 17.6 | 18.4 |
| 2022-07-08 7:00 PM  | 17.8 | 18.7 | 19.1 | 18.5 |
| 2022-07-08 8:00 PM  | 17.3 | 17.6 | 17.5 | 17.5 |
| 2022-07-08 9:00 PM  | 17.0 | 17.3 | 17.0 | 17.1 |
| 2022-07-08 10:00 PM | 16.4 | 16.9 | 16.3 | 16.5 |
| 2022-07-08 11:00 PM | 15.8 | 16.4 | 15.5 | 15.9 |
| 2022-07-09 12:00 AM | 15.4 | 15.8 | 15.0 | 15.4 |
| 2022-07-09 1:00 AM  | 15.0 | 15.4 | 14.3 | 14.9 |
| 2022-07-09 2:00 AM  | 14.7 | 15.1 | 13.9 | 14.6 |
| 2022-07-09 3:00 AM  | 14.4 | 14.7 | 13.4 | 14.2 |
| 2022-07-09 4:00 AM  | 14.0 | 14.2 | 13.0 | 13.7 |
| 2022-07-09 5:00 AM  | 13.6 | 13.8 | 12.5 | 13.3 |
| 2022-07-09 6:00 AM  | 13.4 | 13.6 | 12.3 | 13.1 |
| 2022-07-09 7:00 AM  | 13.1 | 13.2 | 12.0 | 12.8 |
| 2022-07-09 8:00 AM  | 13.5 | 13.6 | 12.4 | 13.2 |
| 2022-07-09 9:00 AM  | 14.7 | 14.9 | 13.8 | 14.5 |
| 2022-07-09 10:00 AM | 15.8 | 15.8 | 15.4 | 15.7 |
| 2022-07-09 11:00 AM | 17.0 | 17.1 | 17.5 | 17.2 |
| 2022-07-09 12:00 PM | 19.1 | 18.2 | 19.8 | 19.0 |
| 2022-07-09 1:00 PM  | 19.1 | 18.9 | 22.1 | 20.0 |
| 2022-07-09 2:00 PM  | 17.8 | 18.8 | 21.2 | 19.3 |
| 2022-07-09 3:00 PM  | 17.6 | 18.3 | 19.7 | 18.5 |
| 2022-07-09 4:00 PM  | 17.8 | 21.3 | 22.2 | 20.4 |
| 2022-07-09 5:00 PM  | 17.6 | 19.2 | 19.9 | 18.9 |
| 2022-07-09 6:00 PM  | 17.7 | 19.4 | 19.7 | 18.9 |
| 2022-07-09 7:00 PM  | 17.6 | 19.6 | 20.3 | 19.2 |

|                     |      |      |      |      |
|---------------------|------|------|------|------|
| 2022-07-09 8:00 PM  | 17.1 | 18.0 | 18.0 | 17.7 |
| 2022-07-09 9:00 PM  | 16.9 | 17.6 | 17.4 | 17.3 |
| 2022-07-09 10:00 PM | 16.5 | 17.1 | 16.7 | 16.8 |
| 2022-07-09 11:00 PM | 15.7 | 16.2 | 15.4 | 15.8 |
| 2022-07-10 12:00 AM | 15.3 | 15.6 | 14.8 | 15.2 |
| 2022-07-10 1:00 AM  | 14.8 | 15.0 | 14.1 | 14.6 |
| 2022-07-10 2:00 AM  | 14.5 | 14.8 | 13.6 | 14.3 |
| 2022-07-10 3:00 AM  | 14.7 | 14.6 | 13.6 | 14.3 |
| 2022-07-10 4:00 AM  | 14.7 | 14.8 | 13.9 | 14.5 |
| 2022-07-10 5:00 AM  | 14.8 | 14.4 | 13.6 | 14.3 |
| 2022-07-10 6:00 AM  | 14.5 | 14.5 | 13.4 | 14.1 |
| 2022-07-10 7:00 AM  | 14.7 | 14.5 | 13.4 | 14.2 |
| 2022-07-10 8:00 AM  | 15.2 | 15.2 | 14.4 | 14.9 |
| 2022-07-10 9:00 AM  | 15.5 | 15.6 | 15.1 | 15.4 |
| 2022-07-10 10:00 AM | 16.3 | 16.1 | 15.9 | 16.1 |
| 2022-07-10 11:00 AM | 17.0 | 16.9 | 17.1 | 17.0 |
| 2022-07-10 12:00 PM | 17.6 | 17.5 | 18.0 | 17.7 |
| 2022-07-10 1:00 PM  | 18.0 | 18.1 | 18.9 | 18.3 |
| 2022-07-10 2:00 PM  | 17.9 | 18.7 | 19.7 | 18.8 |
| 2022-07-10 3:00 PM  | 18.1 | 18.7 | 19.8 | 18.9 |
| 2022-07-10 4:00 PM  | 18.0 | 18.2 | 18.7 | 18.3 |
| 2022-07-10 5:00 PM  | 17.3 | 17.4 | 17.5 | 17.4 |
| 2022-07-10 6:00 PM  | 17.5 | 17.8 | 18.0 | 17.8 |
| 2022-07-10 7:00 PM  | 17.5 | 17.8 | 18.0 | 17.8 |
| 2022-07-10 8:00 PM  | 17.6 | 18.0 | 18.2 | 17.9 |
| 2022-07-10 9:00 PM  | 17.5 | 17.8 | 17.9 | 17.7 |
| 2022-07-10 10:00 PM | 17.2 | 17.5 | 17.4 | 17.4 |
| 2022-07-10 11:00 PM | 17.0 | 17.4 | 17.1 | 17.2 |
| 2022-07-11 12:00 AM | 16.8 | 17.1 | 16.6 | 16.8 |
| 2022-07-11 1:00 AM  | 16.7 | 17.0 | 16.4 | 16.7 |
| 2022-07-11 2:00 AM  | 16.5 | 16.8 | 16.2 | 16.5 |
| 2022-07-11 3:00 AM  | 16.5 | 16.8 | 16.2 | 16.5 |
| 2022-07-11 4:00 AM  | 16.8 | 17.1 | 16.6 | 16.8 |
| 2022-07-11 5:00 AM  | 16.6 | 16.9 | 16.4 | 16.6 |
| 2022-07-11 6:00 AM  | 16.5 | 16.9 | 16.3 | 16.6 |
| 2022-07-11 7:00 AM  | 16.3 | 16.7 | 16.0 | 16.3 |
| 2022-07-11 8:00 AM  | 16.4 | 16.8 | 16.1 | 16.4 |
| 2022-07-11 9:00 AM  | 16.8 | 17.3 | 16.9 | 17.0 |
| 2022-07-11 10:00 AM | 17.7 | 17.9 | 17.8 | 17.8 |
| 2022-07-11 11:00 AM | 18.7 | 18.8 | 19.1 | 18.9 |
| 2022-07-11 12:00 PM | 20.3 | 19.7 | 20.8 | 20.3 |
| 2022-07-11 1:00 PM  | 19.8 | 20.0 | 21.2 | 20.3 |
| 2022-07-11 2:00 PM  | 19.7 | 20.3 | 21.2 | 20.4 |

|                     |      |      |      |      |
|---------------------|------|------|------|------|
| 2022-07-11 3:00 PM  | 19.8 | 20.5 | 21.4 | 20.6 |
| 2022-07-11 4:00 PM  | 19.8 | 20.4 | 21.2 | 20.5 |
| 2022-07-11 5:00 PM  | 19.6 | 20.1 | 20.6 | 20.1 |
| 2022-07-11 6:00 PM  | 19.6 | 20.1 | 20.6 | 20.1 |
| 2022-07-11 7:00 PM  | 19.2 | 19.6 | 19.9 | 19.6 |
| 2022-07-11 8:00 PM  | 19.2 | 19.7 | 20.0 | 19.6 |
| 2022-07-11 9:00 PM  | 18.6 | 18.5 | 19.0 | 18.7 |
| 2022-07-11 10:00 PM | 18.1 | 17.9 | 17.7 | 17.9 |
| 2022-07-11 11:00 PM | 17.8 | 17.7 | 17.3 | 17.6 |
| 2022-07-12 12:00 AM | 17.5 | 17.5 | 16.9 | 17.3 |
| 2022-07-12 1:00 AM  | 17.4 | 17.4 | 16.7 | 17.2 |
| 2022-07-12 2:00 AM  | 17.5 | 17.6 | 16.9 | 17.3 |
| 2022-07-12 3:00 AM  | 17.5 | 17.6 | 17.0 | 17.4 |
| 2022-07-12 4:00 AM  | 17.3 | 17.5 | 16.8 | 17.2 |
| 2022-07-12 5:00 AM  | 17.3 | 17.4 | 16.7 | 17.1 |
| 2022-07-12 6:00 AM  | 17.2 | 17.2 | 16.6 | 17.0 |
| 2022-07-12 7:00 AM  | 17.1 | 17.2 | 16.6 | 17.0 |
| 2022-07-12 8:00 AM  | 16.9 | 17.0 | 16.4 | 16.8 |
| 2022-07-12 9:00 AM  | 16.9 | 16.8 | 16.2 | 16.6 |
| 2022-07-12 10:00 AM | 16.8 | 16.6 | 16.1 | 16.5 |
| 2022-07-12 11:00 AM | 16.5 | 16.2 | 15.6 | 16.1 |
| 2022-07-12 12:00 PM | 16.5 | 16.2 | 15.6 | 16.1 |
| 2022-07-12 1:00 PM  | 16.2 | 15.9 | 16.0 | 16.0 |
| 2022-07-12 2:00 PM  | 17.2 | 16.8 | 16.6 | 16.9 |
| 2022-07-12 3:00 PM  | 17.9 | 17.6 | 17.9 | 17.8 |
| 2022-07-12 4:00 PM  | 17.8 | 17.4 | 17.7 | 17.6 |
| 2022-07-12 5:00 PM  | 17.6 | 17.1 | 17.3 | 17.3 |
| 2022-07-12 6:00 PM  | 17.6 | 17.4 | 17.6 | 17.5 |
| 2022-07-12 7:00 PM  | 17.3 | 17.0 | 17.1 | 17.1 |
| 2022-07-12 8:00 PM  | 17.1 | 16.8 | 16.8 | 16.9 |
| 2022-07-12 9:00 PM  | 16.8 | 16.6 | 16.4 | 16.6 |
| 2022-07-12 10:00 PM | 16.2 | 16.2 | 15.8 | 16.1 |
| 2022-07-12 11:00 PM | 15.5 | 15.6 | 14.8 | 15.3 |
| 2022-07-13 12:00 AM | 15.2 | 15.4 | 14.3 | 15.0 |
| 2022-07-13 1:00 AM  | 14.6 | 14.9 | 13.7 | 14.4 |
| 2022-07-13 2:00 AM  | 14.1 | 14.3 | 13.0 | 13.8 |
| 2022-07-13 3:00 AM  | 13.7 | 13.9 | 12.5 | 13.4 |
| 2022-07-13 4:00 AM  | 13.2 | 13.4 | 12.0 | 12.9 |
| 2022-07-13 5:00 AM  | 12.8 | 13.0 | 11.5 | 12.4 |
| 2022-07-13 6:00 AM  | 12.6 | 12.8 | 11.3 | 12.2 |
| 2022-07-13 7:00 AM  | 12.5 | 12.6 | 11.2 | 12.1 |
| 2022-07-13 8:00 AM  | 12.9 | 13.1 | 11.8 | 12.6 |
| 2022-07-13 9:00 AM  | 14.0 | 14.3 | 13.1 | 13.8 |

|                     |      |      |      |      |
|---------------------|------|------|------|------|
| 2022-07-13 10:00 AM | 15.3 | 15.1 | 14.6 | 15.0 |
| 2022-07-13 11:00 AM | 16.5 | 16.5 | 16.8 | 16.6 |
| 2022-07-13 12:00 PM | 18.6 | 17.4 | 19.0 | 18.3 |
| 2022-07-13 1:00 PM  | 18.3 | 17.9 | 20.4 | 18.9 |
| 2022-07-13 2:00 PM  | 17.5 | 18.4 | 20.4 | 18.8 |
| 2022-07-13 3:00 PM  | 17.6 | 18.1 | 19.0 | 18.2 |
| 2022-07-13 4:00 PM  | 17.6 | 20.9 | 21.2 | 19.9 |
| 2022-07-13 5:00 PM  | 17.1 | 18.3 | 18.7 | 18.0 |
| 2022-07-13 6:00 PM  | 16.9 | 18.2 | 18.1 | 17.7 |
| 2022-07-13 7:00 PM  | 16.9 | 18.7 | 19.2 | 18.3 |
| 2022-07-13 8:00 PM  | 16.6 | 17.2 | 17.1 | 17.0 |
| 2022-07-13 9:00 PM  | 16.5 | 16.9 | 16.6 | 16.7 |
| 2022-07-13 10:00 PM | 16.1 | 16.5 | 16.0 | 16.2 |
| 2022-07-13 11:00 PM | 15.4 | 15.8 | 15.0 | 15.4 |
| 2022-07-14 12:00 AM | 15.0 | 15.3 | 14.5 | 14.9 |
| 2022-07-14 1:00 AM  | 14.7 | 14.9 | 13.9 | 14.5 |
| 2022-07-14 2:00 AM  | 14.4 | 14.6 | 13.4 | 14.1 |
| 2022-07-14 3:00 AM  | 14.1 | 14.3 | 13.0 | 13.8 |
| 2022-07-14 4:00 AM  | 13.6 | 13.8 | 12.4 | 13.3 |
| 2022-07-14 5:00 AM  | 13.0 | 13.3 | 11.7 | 12.7 |
| 2022-07-14 6:00 AM  | 12.6 | 12.8 | 11.0 | 12.1 |
| 2022-07-14 7:00 AM  | 12.3 | 12.5 | 10.7 | 11.8 |
| 2022-07-14 8:00 AM  | 12.8 | 13.1 | 11.3 | 12.4 |
| 2022-07-14 9:00 AM  | 14.2 | 14.3 | 13.0 | 13.8 |
| 2022-07-14 10:00 AM | 15.9 | 15.5 | 15.0 | 15.5 |
| 2022-07-14 11:00 AM | 17.2 | 16.0 | 16.2 | 16.5 |
| 2022-07-14 12:00 PM | 20.8 | 17.3 | 19.3 | 19.1 |
| 2022-07-14 1:00 PM  | 19.6 | 18.6 | 22.7 | 20.3 |
| 2022-07-14 2:00 PM  | 17.9 | 19.3 | 21.3 | 19.5 |
| 2022-07-14 3:00 PM  | 17.6 | 19.4 | 19.3 | 18.8 |
| 2022-07-14 4:00 PM  | 17.8 | 27.0 | 23.3 | 22.7 |
| 2022-07-14 5:00 PM  | 17.4 | 20.6 | 19.5 | 19.2 |
| 2022-07-14 6:00 PM  | 17.4 | 21.1 | 19.5 | 19.3 |
| 2022-07-14 7:00 PM  | 17.4 | 22.0 | 21.0 | 20.1 |
| 2022-07-14 8:00 PM  | 16.9 | 19.2 | 17.9 | 18.0 |
| 2022-07-14 9:00 PM  | 16.5 | 17.9 | 17.0 | 17.1 |
| 2022-07-14 10:00 PM | 16.1 | 16.7 | 16.0 | 16.3 |
| 2022-07-14 11:00 PM | 15.8 | 16.2 | 15.3 | 15.8 |
| 2022-07-15 12:00 AM | 15.3 | 15.7 | 14.7 | 15.2 |
| 2022-07-15 1:00 AM  | 15.1 | 15.4 | 14.4 | 15.0 |
| 2022-07-15 2:00 AM  | 14.9 | 15.1 | 14.1 | 14.7 |
| 2022-07-15 3:00 AM  | 14.8 | 15.1 | 14.0 | 14.6 |
| 2022-07-15 4:00 AM  | 14.7 | 15.0 | 13.9 | 14.5 |



|                     |      |      |      |      |
|---------------------|------|------|------|------|
| 2022-07-15 5:00 AM  | 14.9 | 15.1 | 14.1 | 14.7 |
| 2022-07-15 6:00 AM  | 14.8 | 14.9 | 14.1 | 14.6 |
| 2022-07-15 7:00 AM  | 14.6 | 14.7 | 13.8 | 14.4 |
| 2022-07-15 8:00 AM  | 15.1 | 15.1 | 14.1 | 14.8 |
| 2022-07-15 9:00 AM  | 15.9 | 15.7 | 15.2 | 15.6 |
| 2022-07-15 10:00 AM | 16.8 | 16.2 | 15.7 | 16.2 |
| 2022-07-15 11:00 AM | 18.2 | 17.2 | 17.3 | 17.6 |
| 2022-07-15 12:00 PM | 22.1 | 18.1 | 19.8 | 20.0 |
| 2022-07-15 1:00 PM  | 20.3 | 19.0 | 22.6 | 20.6 |
| 2022-07-15 2:00 PM  | 18.1 | 18.7 | 20.5 | 19.1 |
| 2022-07-15 3:00 PM  | 17.7 | 18.7 | 18.8 | 18.4 |
| 2022-07-15 4:00 PM  | 17.9 | 26.4 | 23.1 | 22.5 |
| 2022-07-15 5:00 PM  | 17.7 | 19.9 | 19.4 | 19.0 |
| 2022-07-15 6:00 PM  | 17.6 | 20.4 | 19.3 | 19.1 |
| 2022-07-15 7:00 PM  | 18.1 | 22.7 | 22.2 | 21.0 |
| 2022-07-15 8:00 PM  | 17.8 | 19.3 | 19.2 | 18.8 |
| 2022-07-15 9:00 PM  | 17.5 | 18.7 | 18.3 | 18.2 |
| 2022-07-15 10:00 PM | 17.3 | 18.1 | 17.6 | 17.7 |
| 2022-07-15 11:00 PM | 16.8 | 17.2 | 16.7 | 16.9 |
| 2022-07-16 12:00 AM | 16.4 | 16.5 | 15.9 | 16.3 |
| 2022-07-16 1:00 AM  | 16.0 | 16.1 | 15.3 | 15.8 |
| 2022-07-16 2:00 AM  | 15.9 | 16.1 | 15.2 | 15.7 |
| 2022-07-16 3:00 AM  | 15.6 | 16.0 | 14.8 | 15.5 |
| 2022-07-16 4:00 AM  | 15.3 | 15.7 | 14.5 | 15.2 |
| 2022-07-16 5:00 AM  | 15.1 | 15.4 | 14.2 | 14.9 |
| 2022-07-16 6:00 AM  | 15.2 | 15.4 | 14.2 | 14.9 |
| 2022-07-16 7:00 AM  | 15.0 | 15.3 | 14.1 | 14.8 |
| 2022-07-16 8:00 AM  | 15.3 | 15.6 | 14.4 | 15.1 |
| 2022-07-16 9:00 AM  | 16.2 | 16.6 | 15.8 | 16.2 |
| 2022-07-16 10:00 AM | 17.7 | 17.6 | 17.4 | 17.6 |
| 2022-07-16 11:00 AM | 19.6 | 19.0 | 19.4 | 19.3 |
| 2022-07-16 12:00 PM | 23.1 | 19.6 | 21.4 | 21.4 |
| 2022-07-16 1:00 PM  | 21.1 | 19.7 | 22.9 | 21.2 |
| 2022-07-16 2:00 PM  | 19.0 | 19.7 | 21.2 | 20.0 |
| 2022-07-16 3:00 PM  | 19.2 | 19.7 | 20.0 | 19.6 |
| 2022-07-16 4:00 PM  | 19.2 | 27.3 | 23.9 | 23.5 |
| 2022-07-16 5:00 PM  | 19.1 | 21.7 | 21.2 | 20.7 |
| 2022-07-16 6:00 PM  | 19.2 | 22.0 | 21.4 | 20.9 |
| 2022-07-16 7:00 PM  | 19.1 | 23.1 | 22.9 | 21.7 |
| 2022-07-16 8:00 PM  | 18.8 | 20.0 | 19.9 | 19.6 |
| 2022-07-16 9:00 PM  | 18.4 | 19.2 | 18.8 | 18.8 |
| 2022-07-16 10:00 PM | 17.8 | 18.5 | 18.0 | 18.1 |
| 2022-07-16 11:00 PM | 17.3 | 17.9 | 17.0 | 17.4 |

|                     |      |      |      |      |
|---------------------|------|------|------|------|
| 2022-07-17 12:00 AM | 17.0 | 17.5 | 16.6 | 17.0 |
| 2022-07-17 1:00 AM  | 16.7 | 17.0 | 16.1 | 16.6 |
| 2022-07-17 2:00 AM  | 16.4 | 16.7 | 15.6 | 16.2 |
| 2022-07-17 3:00 AM  | 16.1 | 16.3 | 15.3 | 15.9 |
| 2022-07-17 4:00 AM  | 15.8 | 16.1 | 14.9 | 15.6 |
| 2022-07-17 5:00 AM  | 15.4 | 15.6 | 14.4 | 15.1 |
| 2022-07-17 6:00 AM  | 15.3 | 15.5 | 14.4 | 15.1 |
| 2022-07-17 7:00 AM  | 15.2 | 15.3 | 14.3 | 14.9 |
| 2022-07-17 8:00 AM  | 15.5 | 15.7 | 14.5 | 15.2 |
| 2022-07-17 9:00 AM  | 16.3 | 16.6 | 15.6 | 16.2 |
| 2022-07-17 10:00 AM | 17.4 | 17.1 | 16.5 | 17.0 |
| 2022-07-17 11:00 AM | 18.8 | 17.2 | 17.4 | 17.8 |
| 2022-07-17 12:00 PM | 21.4 | 17.6 | 19.3 | 19.4 |
| 2022-07-17 1:00 PM  | 20.5 | 18.8 | 22.4 | 20.6 |
| 2022-07-17 2:00 PM  | 18.9 | 19.4 | 21.6 | 20.0 |
| 2022-07-17 3:00 PM  | 18.6 | 19.2 | 19.7 | 19.2 |
| 2022-07-17 4:00 PM  | 18.7 | 25.6 | 23.1 | 22.5 |
| 2022-07-17 5:00 PM  | 18.0 | 19.5 | 19.2 | 18.9 |
| 2022-07-17 6:00 PM  | 18.0 | 19.8 | 19.1 | 19.0 |
| 2022-07-17 7:00 PM  | 17.9 | 21.0 | 20.8 | 19.9 |
| 2022-07-17 8:00 PM  | 17.4 | 17.9 | 17.6 | 17.6 |
| 2022-07-17 9:00 PM  | 17.1 | 17.3 | 16.8 | 17.1 |
| 2022-07-17 10:00 PM | 16.5 | 16.6 | 16.0 | 16.4 |
| 2022-07-17 11:00 PM | 16.2 | 16.3 | 15.5 | 16.0 |
| 2022-07-18 12:00 AM | 16.2 | 16.2 | 15.5 | 16.0 |
| 2022-07-18 1:00 AM  | 16.2 | 16.1 | 15.4 | 15.9 |
| 2022-07-18 2:00 AM  | 16.0 | 16.0 | 15.2 | 15.7 |
| 2022-07-18 3:00 AM  | 15.9 | 16.0 | 15.2 | 15.7 |
| 2022-07-18 4:00 AM  | 15.8 | 16.1 | 15.1 | 15.7 |
| 2022-07-18 5:00 AM  | 16.0 | 16.2 | 15.3 | 15.8 |
| 2022-07-18 6:00 AM  | 16.1 | 16.3 | 15.5 | 16.0 |
| 2022-07-18 7:00 AM  | 16.3 | 16.5 | 15.8 | 16.2 |
| 2022-07-18 8:00 AM  | 16.2 | 16.6 | 15.7 | 16.2 |
| 2022-07-18 9:00 AM  | 16.9 | 17.3 | 16.9 | 17.0 |
| 2022-07-18 10:00 AM | 18.1 | 18.3 | 18.2 | 18.2 |
| 2022-07-18 11:00 AM | 20.0 | 20.0 | 20.6 | 20.2 |
| 2022-07-18 12:00 PM | 24.4 | 21.6 | 23.9 | 23.3 |
| 2022-07-18 1:00 PM  | 22.8 | 22.9 | 27.1 | 24.3 |
| 2022-07-18 2:00 PM  | 21.0 | 23.3 | 25.5 | 23.3 |
| 2022-07-18 3:00 PM  | 21.6 | 23.6 | 24.6 | 23.3 |
| 2022-07-18 4:00 PM  | 21.9 | 28.7 | 27.7 | 26.1 |
| 2022-07-18 5:00 PM  | 21.3 | 24.6 | 24.7 | 23.5 |
| 2022-07-18 6:00 PM  | 21.3 | 25.0 | 25.0 | 23.8 |

|                     |      |      |      |      |
|---------------------|------|------|------|------|
| 2022-07-18 7:00 PM  | 21.3 | 26.7 | 26.8 | 24.9 |
| 2022-07-18 8:00 PM  | 21.0 | 23.0 | 23.4 | 22.5 |
| 2022-07-18 9:00 PM  | 20.9 | 22.3 | 22.7 | 22.0 |
| 2022-07-18 10:00 PM | 20.5 | 21.6 | 21.6 | 21.2 |
| 2022-07-18 11:00 PM | 20.1 | 21.1 | 20.8 | 20.7 |
| 2022-07-19 12:00 AM | 19.8 | 20.6 | 20.1 | 20.2 |
| 2022-07-19 1:00 AM  | 19.8 | 20.6 | 20.0 | 20.1 |
| 2022-07-19 2:00 AM  | 19.8 | 20.5 | 20.0 | 20.1 |
| 2022-07-19 3:00 AM  | 19.6 | 20.3 | 19.8 | 19.9 |
| 2022-07-19 4:00 AM  | 19.6 | 20.3 | 19.7 | 19.9 |
| 2022-07-19 5:00 AM  | 19.4 | 20.1 | 19.5 | 19.7 |
| 2022-07-19 6:00 AM  | 19.2 | 19.9 | 19.2 | 19.4 |
| 2022-07-19 7:00 AM  | 19.2 | 19.8 | 19.0 | 19.3 |
| 2022-07-19 8:00 AM  | 19.1 | 19.7 | 19.0 | 19.3 |
| 2022-07-19 9:00 AM  | 19.1 | 19.6 | 19.0 | 19.2 |
| 2022-07-19 10:00 AM | 19.1 | 19.5 | 19.0 | 19.2 |
| 2022-07-19 11:00 AM | 19.2 | 19.4 | 18.9 | 19.2 |
| 2022-07-19 12:00 PM | 18.8 | 18.6 | 18.2 | 18.5 |
| 2022-07-19 1:00 PM  | 18.2 | 17.7 | 17.3 | 17.7 |
| 2022-07-19 2:00 PM  | 18.6 | 18.4 | 17.9 | 18.3 |
| 2022-07-19 3:00 PM  | 18.7 | 18.5 | 18.1 | 18.4 |
| 2022-07-19 4:00 PM  | 18.3 | 17.7 | 17.4 | 17.8 |
| 2022-07-19 5:00 PM  | 18.1 | 17.5 | 17.2 | 17.6 |
| 2022-07-19 6:00 PM  | 18.8 | 18.4 | 18.1 | 18.4 |
| 2022-07-19 7:00 PM  | 18.8 | 18.4 | 18.3 | 18.5 |
| 2022-07-19 8:00 PM  | 18.5 | 18.3 | 18.1 | 18.3 |
| 2022-07-19 9:00 PM  | 18.1 | 17.8 | 17.5 | 17.8 |
| 2022-07-19 10:00 PM | 17.7 | 17.5 | 17.1 | 17.4 |
| 2022-07-19 11:00 PM | 17.5 | 17.1 | 16.6 | 17.1 |
| 2022-07-20 12:00 AM | 17.4 | 17.0 | 16.5 | 17.0 |
| 2022-07-20 1:00 AM  | 17.4 | 17.4 | 16.7 | 17.2 |
| 2022-07-20 2:00 AM  | 17.3 | 17.3 | 16.7 | 17.1 |
| 2022-07-20 3:00 AM  | 17.1 | 17.2 | 16.4 | 16.9 |
| 2022-07-20 4:00 AM  | 16.9 | 17.0 | 16.2 | 16.7 |
| 2022-07-20 5:00 AM  | 16.5 | 16.6 | 15.7 | 16.3 |
| 2022-07-20 6:00 AM  | 16.2 | 16.3 | 15.3 | 15.9 |
| 2022-07-20 7:00 AM  | 15.8 | 15.9 | 15.0 | 15.6 |
| 2022-07-20 8:00 AM  | 16.1 | 16.1 | 15.2 | 15.8 |
| 2022-07-20 9:00 AM  | 17.0 | 16.9 | 16.2 | 16.7 |
| 2022-07-20 10:00 AM | 17.9 | 17.6 | 17.3 | 17.6 |
| 2022-07-20 11:00 AM | 19.5 | 19.1 | 19.3 | 19.3 |
| 2022-07-20 12:00 PM | 21.0 | 19.9 | 20.8 | 20.6 |
| 2022-07-20 1:00 PM  | 20.6 | 20.4 | 21.4 | 20.8 |

|                     |      |      |      |      |
|---------------------|------|------|------|------|
| 2022-07-20 2:00 PM  | 20.4 | 20.5 | 21.3 | 20.7 |
| 2022-07-20 3:00 PM  | 19.9 | 20.2 | 20.7 | 20.3 |
| 2022-07-20 4:00 PM  | 20.1 | 20.6 | 20.8 | 20.5 |
| 2022-07-20 5:00 PM  | 19.9 | 20.3 | 20.4 | 20.2 |
| 2022-07-20 6:00 PM  | 20.2 | 20.5 | 20.7 | 20.5 |
| 2022-07-20 7:00 PM  | 20.2 | 20.8 | 20.9 | 20.6 |
| 2022-07-20 8:00 PM  | 20.1 | 20.5 | 20.8 | 20.5 |
| 2022-07-20 9:00 PM  | 19.9 | 20.3 | 20.5 | 20.2 |
| 2022-07-20 10:00 PM | 19.8 | 20.1 | 20.2 | 20.0 |
| 2022-07-20 11:00 PM | 19.1 | 19.5 | 19.1 | 19.2 |
| 2022-07-21 12:00 AM | 18.6 | 19.0 | 18.3 | 18.6 |
| 2022-07-21 1:00 AM  | 18.3 | 18.7 | 17.9 | 18.3 |
| 2022-07-21 2:00 AM  | 18.0 | 18.3 | 17.4 | 17.9 |
| 2022-07-21 3:00 AM  | 17.8 | 18.1 | 17.1 | 17.7 |
| 2022-07-21 4:00 AM  | 17.9 | 18.1 | 17.3 | 17.8 |
| 2022-07-21 5:00 AM  | 17.9 | 18.2 | 17.3 | 17.8 |
| 2022-07-21 6:00 AM  | 17.8 | 18.1 | 17.3 | 17.7 |
| 2022-07-21 7:00 AM  | 17.6 | 17.9 | 17.0 | 17.5 |
| 2022-07-21 8:00 AM  | 17.7 | 17.9 | 16.9 | 17.5 |
| 2022-07-21 9:00 AM  | 18.1 | 18.2 | 17.5 | 17.9 |
| 2022-07-21 10:00 AM | 18.9 | 18.8 | 18.3 | 18.7 |
| 2022-07-21 11:00 AM | 20.4 | 19.8 | 20.1 | 20.1 |
| 2022-07-21 12:00 PM | 24.2 | 20.8 | 23.0 | 22.7 |
| 2022-07-21 1:00 PM  | 22.2 | 21.5 | 24.1 | 22.6 |
| 2022-07-21 2:00 PM  | 20.9 | 21.4 | 22.6 | 21.6 |
| 2022-07-21 3:00 PM  | 20.7 | 22.0 | 22.7 | 21.8 |
| 2022-07-21 4:00 PM  | 20.8 | 29.5 | 25.8 | 25.4 |
| 2022-07-21 5:00 PM  | 20.4 | 22.7 | 22.3 | 21.8 |
| 2022-07-21 6:00 PM  | 20.3 | 21.9 | 21.6 | 21.3 |
| 2022-07-21 7:00 PM  | 19.9 | 22.7 | 21.6 | 21.4 |
| 2022-07-21 8:00 PM  | 19.5 | 20.5 | 20.0 | 20.0 |
| 2022-07-21 9:00 PM  | 19.4 | 20.1 | 19.5 | 19.7 |
| 2022-07-21 10:00 PM | 19.0 | 19.7 | 18.9 | 19.2 |
| 2022-07-21 11:00 PM | 18.3 | 18.9 | 17.9 | 18.4 |
| 2022-07-22 12:00 AM | 17.8 | 18.1 | 17.1 | 17.7 |
| 2022-07-22 1:00 AM  | 17.4 | 17.7 | 16.6 | 17.2 |
| 2022-07-22 2:00 AM  | 17.1 | 17.4 | 16.2 | 16.9 |
| 2022-07-22 3:00 AM  | 16.9 | 17.1 | 15.9 | 16.6 |
| 2022-07-22 4:00 AM  | 16.6 | 16.8 | 15.6 | 16.3 |
| 2022-07-22 5:00 AM  | 16.3 | 16.5 | 15.2 | 16.0 |
| 2022-07-22 6:00 AM  | 16.0 | 16.2 | 14.9 | 15.7 |
| 2022-07-22 7:00 AM  | 15.9 | 16.1 | 14.8 | 15.6 |
| 2022-07-22 8:00 AM  | 16.1 | 16.4 | 15.0 | 15.8 |

|                     |      |      |      |      |
|---------------------|------|------|------|------|
| 2022-07-22 9:00 AM  | 17.1 | 17.4 | 16.3 | 16.9 |
| 2022-07-22 10:00 AM | 18.2 | 18.3 | 17.8 | 18.1 |
| 2022-07-22 11:00 AM | 19.8 | 19.7 | 19.9 | 19.8 |
| 2022-07-22 12:00 PM | 23.5 | 20.8 | 22.6 | 22.3 |
| 2022-07-22 1:00 PM  | 22.3 | 21.8 | 25.2 | 23.1 |
| 2022-07-22 2:00 PM  | 20.7 | 21.7 | 23.1 | 21.8 |
| 2022-07-22 3:00 PM  | 20.7 | 21.9 | 22.1 | 21.6 |
| 2022-07-22 4:00 PM  | 21.0 | 25.3 | 23.9 | 23.4 |
| 2022-07-22 5:00 PM  | 20.6 | 21.9 | 22.2 | 21.6 |
| 2022-07-22 6:00 PM  | 20.7 | 22.1 | 22.6 | 21.8 |
| 2022-07-22 7:00 PM  | 20.6 | 21.8 | 22.2 | 21.5 |
| 2022-07-22 8:00 PM  | 20.2 | 21.2 | 21.2 | 20.9 |
| 2022-07-22 9:00 PM  | 20.1 | 20.9 | 20.8 | 20.6 |
| 2022-07-22 10:00 PM | 19.6 | 20.4 | 19.8 | 19.9 |
| 2022-07-22 11:00 PM | 19.1 | 19.8 | 18.7 | 19.2 |
| 2022-07-23 12:00 AM | 18.7 | 19.3 | 18.2 | 18.7 |
| 2022-07-23 1:00 AM  | 18.3 | 18.8 | 17.5 | 18.2 |
| 2022-07-23 2:00 AM  | 18.1 | 18.5 | 17.3 | 18.0 |
| 2022-07-23 3:00 AM  | 17.6 | 18.0 | 16.7 | 17.4 |
| 2022-07-23 4:00 AM  | 17.2 | 17.6 | 16.1 | 17.0 |
| 2022-07-23 5:00 AM  | 17.0 | 17.3 | 15.9 | 16.7 |
| 2022-07-23 6:00 AM  | 16.8 | 17.2 | 15.8 | 16.6 |
| 2022-07-23 7:00 AM  | 16.7 | 17.1 | 15.7 | 16.5 |
| 2022-07-23 8:00 AM  | 17.1 | 17.3 | 16.1 | 16.8 |
| 2022-07-23 9:00 AM  | 17.9 | 17.9 | 17.0 | 17.6 |
| 2022-07-23 10:00 AM | 18.6 | 18.6 | 18.1 | 18.4 |
| 2022-07-23 11:00 AM | 19.8 | 19.2 | 19.1 | 19.4 |
| 2022-07-23 12:00 PM | 23.3 | 20.1 | 21.9 | 21.8 |
| 2022-07-23 1:00 PM  | 21.7 | 20.9 | 23.4 | 22.0 |
| 2022-07-23 2:00 PM  | 21.0 | 20.9 | 21.9 | 21.3 |
| 2022-07-23 3:00 PM  | 20.8 | 20.8 | 21.4 | 21.0 |
| 2022-07-23 4:00 PM  | 19.8 | 19.7 | 19.8 | 19.8 |
| 2022-07-23 5:00 PM  | 20.2 | 20.1 | 20.3 | 20.2 |
| 2022-07-23 6:00 PM  | 19.7 | 19.7 | 19.8 | 19.7 |
| 2022-07-23 7:00 PM  | 19.1 | 19.1 | 18.7 | 19.0 |
| 2022-07-23 8:00 PM  | 18.8 | 18.8 | 18.3 | 18.6 |
| 2022-07-23 9:00 PM  | 18.7 | 18.8 | 18.1 | 18.5 |
| 2022-07-23 10:00 PM | 18.6 | 18.7 | 18.1 | 18.5 |
| 2022-07-23 11:00 PM | 18.5 | 18.6 | 17.9 | 18.3 |
| 2022-07-24 12:00 AM | 18.1 | 18.3 | 17.5 | 18.0 |
| 2022-07-24 1:00 AM  | 17.7 | 17.9 | 16.9 | 17.5 |
| 2022-07-24 2:00 AM  | 18.0 | 18.2 | 17.3 | 17.8 |
| 2022-07-24 3:00 AM  | 17.9 | 18.0 | 17.3 | 17.7 |

|                     |      |      |      |      |
|---------------------|------|------|------|------|
| 2022-07-24 4:00 AM  | 17.8 | 17.9 | 17.1 | 17.6 |
| 2022-07-24 5:00 AM  | 17.6 | 17.7 | 16.9 | 17.4 |
| 2022-07-24 6:00 AM  | 17.5 | 17.7 | 16.8 | 17.3 |
| 2022-07-24 7:00 AM  | 17.4 | 17.5 | 16.6 | 17.2 |
| 2022-07-24 8:00 AM  | 17.3 | 17.3 | 16.4 | 17.0 |
| 2022-07-24 9:00 AM  | 17.6 | 17.8 | 16.9 | 17.4 |
| 2022-07-24 10:00 AM | 18.3 | 18.1 | 17.5 | 18.0 |
| 2022-07-24 11:00 AM | 19.4 | 18.8 | 18.7 | 19.0 |
| 2022-07-24 12:00 PM | 19.3 | 18.3 | 18.4 | 18.7 |
| 2022-07-24 1:00 PM  | 19.2 | 18.3 | 18.3 | 18.6 |
| 2022-07-24 2:00 PM  | 19.3 | 18.1 | 18.3 | 18.6 |
| 2022-07-24 3:00 PM  | 18.7 | 17.3 | 17.5 | 17.8 |
| 2022-07-24 4:00 PM  | 18.4 | 16.9 | 17.0 | 17.4 |
| 2022-07-24 5:00 PM  | 18.3 | 17.4 | 17.3 | 17.7 |
| 2022-07-24 6:00 PM  | 18.1 | 17.6 | 17.4 | 17.7 |
| 2022-07-24 7:00 PM  | 17.7 | 18.3 | 17.9 | 18.0 |
| 2022-07-24 8:00 PM  | 17.1 | 16.9 | 16.2 | 16.7 |
| 2022-07-24 9:00 PM  | 16.7 | 16.5 | 15.8 | 16.3 |
| 2022-07-24 10:00 PM | 16.3 | 16.0 | 15.2 | 15.8 |
| 2022-07-24 11:00 PM | 16.0 | 16.0 | 14.8 | 15.6 |
| 2022-07-25 12:00 AM | 16.0 | 16.0 | 15.0 | 15.7 |
| 2022-07-25 1:00 AM  | 16.0 | 15.9 | 15.0 | 15.6 |
| 2022-07-25 2:00 AM  | 16.0 | 15.6 | 14.9 | 15.5 |
| 2022-07-25 3:00 AM  | 15.8 | 15.6 | 14.8 | 15.4 |
| 2022-07-25 4:00 AM  | 15.4 | 15.4 | 14.2 | 15.0 |
| 2022-07-25 5:00 AM  | 15.1 | 15.1 | 13.8 | 14.7 |
| 2022-07-25 6:00 AM  | 14.8 | 14.9 | 13.5 | 14.4 |
| 2022-07-25 7:00 AM  | 14.6 | 14.8 | 13.3 | 14.2 |
| 2022-07-25 8:00 AM  | 14.8 | 15.0 | 13.5 | 14.4 |
| 2022-07-25 9:00 AM  | 15.4 | 15.6 | 14.3 | 15.1 |
| 2022-07-25 10:00 AM | 16.4 | 16.3 | 15.5 | 16.1 |
| 2022-07-25 11:00 AM | 17.9 | 17.4 | 17.4 | 17.6 |
| 2022-07-25 12:00 PM | 21.4 | 18.4 | 20.1 | 20.0 |
| 2022-07-25 1:00 PM  | 20.3 | 19.6 | 22.5 | 20.8 |
| 2022-07-25 2:00 PM  | 18.9 | 19.7 | 20.9 | 19.8 |
| 2022-07-25 3:00 PM  | 18.8 | 19.8 | 20.1 | 19.6 |
| 2022-07-25 4:00 PM  | 19.0 | 24.8 | 22.3 | 22.0 |
| 2022-07-25 5:00 PM  | 18.7 | 20.3 | 20.2 | 19.7 |
| 2022-07-25 6:00 PM  | 18.9 | 21.1 | 20.5 | 20.2 |
| 2022-07-25 7:00 PM  | 18.9 | 22.5 | 22.3 | 21.2 |
| 2022-07-25 8:00 PM  | 18.2 | 19.3 | 19.1 | 18.9 |
| 2022-07-25 9:00 PM  | 18.0 | 18.8 | 18.4 | 18.4 |
| 2022-07-25 10:00 PM | 17.5 | 18.2 | 17.5 | 17.7 |

|                     |      |      |      |      |
|---------------------|------|------|------|------|
| 2022-07-25 11:00 PM | 17.0 | 17.6 | 16.6 | 17.1 |
| 2022-07-26 12:00 AM | 16.6 | 16.9 | 15.8 | 16.4 |
| 2022-07-26 1:00 AM  | 16.1 | 16.3 | 15.1 | 15.8 |
| 2022-07-26 2:00 AM  | 15.8 | 16.0 | 14.8 | 15.5 |
| 2022-07-26 3:00 AM  | 15.6 | 15.7 | 14.5 | 15.3 |
| 2022-07-26 4:00 AM  | 15.4 | 15.5 | 14.3 | 15.1 |
| 2022-07-26 5:00 AM  | 15.1 | 15.2 | 14.0 | 14.8 |
| 2022-07-26 6:00 AM  | 15.0 | 15.2 | 13.7 | 14.6 |
| 2022-07-26 7:00 AM  | 14.9 | 14.9 | 13.6 | 14.5 |
| 2022-07-26 8:00 AM  | 15.2 | 15.4 | 14.2 | 14.9 |
| 2022-07-26 9:00 AM  | 16.2 | 16.2 | 15.2 | 15.9 |
| 2022-07-26 10:00 AM | 17.1 | 17.0 | 16.5 | 16.9 |
| 2022-07-26 11:00 AM | 18.1 | 17.8 | 17.8 | 17.9 |
| 2022-07-26 12:00 PM | 19.0 | 18.1 | 18.5 | 18.5 |
| 2022-07-26 1:00 PM  | 18.7 | 18.6 | 19.5 | 18.9 |
| 2022-07-26 2:00 PM  | 18.9 | 19.8 | 21.0 | 19.9 |
| 2022-07-26 3:00 PM  | 19.1 | 19.8 | 20.5 | 19.8 |
| 2022-07-26 4:00 PM  | 19.0 | 19.5 | 20.0 | 19.5 |
| 2022-07-26 5:00 PM  | 19.2 | 19.8 | 20.2 | 19.7 |
| 2022-07-26 6:00 PM  | 19.3 | 19.8 | 20.3 | 19.8 |
| 2022-07-26 7:00 PM  | 19.0 | 19.5 | 19.8 | 19.4 |
| 2022-07-26 8:00 PM  | 18.7 | 19.1 | 19.2 | 19.0 |
| 2022-07-26 9:00 PM  | 18.5 | 18.8 | 18.7 | 18.7 |
| 2022-07-26 10:00 PM | 18.5 | 18.8 | 18.6 | 18.6 |
| 2022-07-26 11:00 PM | 18.1 | 18.4 | 17.9 | 18.1 |
| 2022-07-27 12:00 AM | 17.8 | 18.1 | 17.4 | 17.8 |
| 2022-07-27 1:00 AM  | 18.0 | 18.2 | 17.6 | 17.9 |
| 2022-07-27 2:00 AM  | 17.7 | 18.0 | 17.2 | 17.6 |
| 2022-07-27 3:00 AM  | 17.6 | 17.9 | 17.1 | 17.5 |
| 2022-07-27 4:00 AM  | 17.1 | 17.5 | 16.4 | 17.0 |
| 2022-07-27 5:00 AM  | 16.6 | 16.9 | 15.7 | 16.4 |
| 2022-07-27 6:00 AM  | 16.4 | 16.7 | 15.5 | 16.2 |
| 2022-07-27 7:00 AM  | 16.3 | 16.5 | 15.4 | 16.1 |
| 2022-07-27 8:00 AM  | 16.4 | 16.6 | 15.5 | 16.2 |
| 2022-07-27 9:00 AM  | 17.0 | 17.3 | 16.2 | 16.8 |
| 2022-07-27 10:00 AM | 17.7 | 17.8 | 17.2 | 17.6 |
| 2022-07-27 11:00 AM | 19.0 | 18.5 | 18.5 | 18.7 |
| 2022-07-27 12:00 PM | 22.2 | 19.3 | 20.8 | 20.8 |
| 2022-07-27 1:00 PM  | 21.1 | 20.2 | 23.6 | 21.6 |
| 2022-07-27 2:00 PM  | 20.1 | 20.3 | 22.0 | 20.8 |
| 2022-07-27 3:00 PM  | 19.9 | 20.1 | 20.9 | 20.3 |
| 2022-07-27 4:00 PM  | 19.9 | 25.0 | 23.0 | 22.6 |
| 2022-07-27 5:00 PM  | 19.7 | 21.1 | 21.1 | 20.6 |

|                     |      |      |      |      |
|---------------------|------|------|------|------|
| 2022-07-27 6:00 PM  | 19.6 | 20.4 | 20.6 | 20.2 |
| 2022-07-27 7:00 PM  | 18.9 | 18.8 | 18.8 | 18.8 |
| 2022-07-27 8:00 PM  | 18.3 | 18.3 | 17.9 | 18.2 |
| 2022-07-27 9:00 PM  | 17.7 | 16.7 | 16.6 | 17.0 |
| 2022-07-27 10:00 PM | 17.3 | 17.0 | 16.3 | 16.9 |
| 2022-07-27 11:00 PM | 17.0 | 17.1 | 16.3 | 16.8 |
| 2022-07-28 12:00 AM | 16.5 | 16.6 | 15.8 | 16.3 |
| 2022-07-28 1:00 AM  | 16.2 | 16.3 | 15.3 | 15.9 |
| 2022-07-28 2:00 AM  | 16.3 | 16.4 | 15.5 | 16.1 |
| 2022-07-28 3:00 AM  | 16.3 | 16.3 | 15.5 | 16.0 |
| 2022-07-28 4:00 AM  | 16.2 | 16.4 | 15.5 | 16.0 |
| 2022-07-28 5:00 AM  | 16.2 | 16.4 | 15.5 | 16.0 |
| 2022-07-28 6:00 AM  | 16.1 | 16.2 | 15.2 | 15.8 |
| 2022-07-28 7:00 AM  | 15.8 | 16.0 | 14.9 | 15.6 |
| 2022-07-28 8:00 AM  | 15.8 | 15.9 | 14.8 | 15.5 |
| 2022-07-28 9:00 AM  | 16.2 | 16.3 | 15.4 | 16.0 |
| 2022-07-28 10:00 AM | 16.7 | 16.2 | 15.7 | 16.2 |
| 2022-07-28 11:00 AM | 17.7 | 16.9 | 16.8 | 17.1 |
| 2022-07-28 12:00 PM | 18.6 | 17.3 | 17.6 | 17.8 |
| 2022-07-28 1:00 PM  | 18.8 | 18.0 | 19.3 | 18.7 |
| 2022-07-28 2:00 PM  | 18.6 | 18.4 | 19.3 | 18.8 |
| 2022-07-28 3:00 PM  | 18.5 | 18.3 | 18.5 | 18.4 |
| 2022-07-28 4:00 PM  | 18.5 | 18.3 | 18.3 | 18.4 |
| 2022-07-28 5:00 PM  | 18.7 | 18.9 | 18.9 | 18.8 |
| 2022-07-28 6:00 PM  | 18.6 | 19.1 | 19.0 | 18.9 |
| 2022-07-28 7:00 PM  | 18.4 | 18.3 | 18.3 | 18.3 |
| 2022-07-28 8:00 PM  | 18.0 | 18.0 | 17.8 | 17.9 |
| 2022-07-28 9:00 PM  | 17.7 | 17.9 | 17.4 | 17.7 |
| 2022-07-28 10:00 PM | 17.1 | 17.4 | 16.6 | 17.0 |
| 2022-07-28 11:00 PM | 16.9 | 17.2 | 16.3 | 16.8 |
| 2022-07-29 12:00 AM | 16.6 | 16.8 | 15.8 | 16.4 |
| 2022-07-29 1:00 AM  | 16.2 | 16.5 | 15.3 | 16.0 |
| 2022-07-29 2:00 AM  | 16.0 | 16.1 | 15.1 | 15.7 |
| 2022-07-29 3:00 AM  | 16.1 | 16.3 | 15.3 | 15.9 |
| 2022-07-29 4:00 AM  | 16.2 | 16.4 | 15.5 | 16.0 |
| 2022-07-29 5:00 AM  | 16.2 | 16.4 | 15.5 | 16.0 |
| 2022-07-29 6:00 AM  | 16.2 | 16.3 | 15.4 | 16.0 |
| 2022-07-29 7:00 AM  | 16.2 | 16.4 | 15.5 | 16.0 |
| 2022-07-29 8:00 AM  | 16.4 | 16.3 | 15.6 | 16.1 |
| 2022-07-29 9:00 AM  | 16.7 | 16.2 | 15.6 | 16.2 |
| 2022-07-29 10:00 AM | 17.3 | 16.9 | 16.5 | 16.9 |
| 2022-07-29 11:00 AM | 18.3 | 18.1 | 18.1 | 18.2 |
| 2022-07-29 12:00 PM | 19.7 | 18.7 | 19.2 | 19.2 |



|                     |      |      |      |      |
|---------------------|------|------|------|------|
| 2022-07-29 1:00 PM  | 19.7 | 19.2 | 20.0 | 19.6 |
| 2022-07-29 2:00 PM  | 19.4 | 19.2 | 19.8 | 19.5 |
| 2022-07-29 3:00 PM  | 19.2 | 19.0 | 19.4 | 19.2 |
| 2022-07-29 4:00 PM  | 19.3 | 19.1 | 19.4 | 19.3 |
| 2022-07-29 5:00 PM  | 19.0 | 18.8 | 19.1 | 19.0 |
| 2022-07-29 6:00 PM  | 18.9 | 18.6 | 19.0 | 18.8 |
| 2022-07-29 7:00 PM  | 18.8 | 18.6 | 19.0 | 18.8 |
| 2022-07-29 8:00 PM  | 18.1 | 17.8 | 17.9 | 17.9 |
| 2022-07-29 9:00 PM  | 17.8 | 17.9 | 17.4 | 17.7 |
| 2022-07-29 10:00 PM | 17.3 | 17.5 | 16.7 | 17.2 |
| 2022-07-29 11:00 PM | 17.2 | 17.2 | 16.4 | 16.9 |
| 2022-07-30 12:00 AM | 16.9 | 17.0 | 16.1 | 16.7 |
| 2022-07-30 1:00 AM  | 16.5 | 16.5 | 15.5 | 16.2 |
| 2022-07-30 2:00 AM  | 16.1 | 16.1 | 15.0 | 15.7 |
| 2022-07-30 3:00 AM  | 15.7 | 15.8 | 14.6 | 15.4 |
| 2022-07-30 4:00 AM  | 15.4 | 15.4 | 14.3 | 15.0 |
| 2022-07-30 5:00 AM  | 15.1 | 15.2 | 14.0 | 14.8 |
| 2022-07-30 6:00 AM  | 15.0 | 15.0 | 13.9 | 14.6 |
| 2022-07-30 7:00 AM  | 14.9 | 14.9 | 13.8 | 14.5 |
| 2022-07-30 8:00 AM  | 15.1 | 15.3 | 14.1 | 14.8 |
| 2022-07-30 9:00 AM  | 16.0 | 16.3 | 15.2 | 15.8 |
| 2022-07-30 10:00 AM | 16.9 | 17.0 | 16.5 | 16.8 |
| 2022-07-30 11:00 AM | 18.2 | 18.2 | 18.5 | 18.3 |
| 2022-07-30 12:00 PM | 21.7 | 19.4 | 21.4 | 20.8 |
| 2022-07-30 1:00 PM  | 20.9 | 20.3 | 23.5 | 21.6 |
| 2022-07-30 2:00 PM  | 19.7 | 20.1 | 21.8 | 20.5 |
| 2022-07-30 3:00 PM  | 19.8 | 20.2 | 21.2 | 20.4 |
| 2022-07-30 4:00 PM  | 19.8 | 22.3 | 21.8 | 21.3 |
| 2022-07-30 5:00 PM  | 19.6 | 20.7 | 21.1 | 20.5 |
| 2022-07-30 6:00 PM  | 19.6 | 21.4 | 21.2 | 20.7 |
| 2022-07-30 7:00 PM  | 19.6 | 22.8 | 22.5 | 21.6 |
| 2022-07-30 8:00 PM  | 19.2 | 20.4 | 20.5 | 20.0 |
| 2022-07-30 9:00 PM  | 19.0 | 19.8 | 19.7 | 19.5 |
| 2022-07-30 10:00 PM | 18.6 | 19.3 | 18.8 | 18.9 |
| 2022-07-30 11:00 PM | 18.2 | 18.7 | 18.0 | 18.3 |
| 2022-07-31 12:00 AM | 17.8 | 18.2 | 17.3 | 17.8 |
| 2022-07-31 1:00 AM  | 17.4 | 17.8 | 16.8 | 17.3 |
| 2022-07-31 2:00 AM  | 17.3 | 17.7 | 16.7 | 17.2 |
| 2022-07-31 3:00 AM  | 17.1 | 17.4 | 16.4 | 17.0 |
| 2022-07-31 4:00 AM  | 16.9 | 17.1 | 16.0 | 16.7 |
| 2022-07-31 5:00 AM  | 16.8 | 16.9 | 16.0 | 16.6 |
| 2022-07-31 6:00 AM  | 16.9 | 16.8 | 16.1 | 16.6 |
| 2022-07-31 7:00 AM  | 16.6 | 16.6 | 15.8 | 16.3 |

|                     |      |      |      |      |
|---------------------|------|------|------|------|
| 2022-07-31 8:00 AM  | 16.8 | 16.8 | 15.9 | 16.5 |
| 2022-07-31 9:00 AM  | 17.6 | 17.8 | 17.0 | 17.5 |
| 2022-07-31 10:00 AM | 18.1 | 18.1 | 17.6 | 17.9 |
| 2022-07-31 11:00 AM | 18.9 | 18.5 | 18.4 | 18.6 |
| 2022-07-31 12:00 PM | 20.2 | 19.2 | 19.8 | 19.7 |
| 2022-07-31 1:00 PM  | 20.4 | 19.8 | 22.0 | 20.7 |
| 2022-07-31 2:00 PM  | 20.0 | 20.5 | 22.2 | 20.9 |
| 2022-07-31 3:00 PM  | 19.8 | 19.6 | 20.4 | 19.9 |
| 2022-07-31 4:00 PM  | 19.6 | 19.6 | 19.9 | 19.7 |
| 2022-07-31 5:00 PM  | 20.1 | 20.7 | 21.2 | 20.7 |
| 2022-07-31 6:00 PM  | 19.7 | 20.1 | 20.4 | 20.1 |
| 2022-07-31 7:00 PM  | 19.3 | 19.6 | 19.6 | 19.5 |
| 2022-07-31 8:00 PM  | 19.1 | 19.4 | 19.2 | 19.2 |
| 2022-07-31 9:00 PM  | 18.9 | 18.9 | 18.6 | 18.8 |
| 2022-07-31 10:00 PM | 18.3 | 18.2 | 17.8 | 18.1 |
| 2022-07-31 11:00 PM | 18.1 | 18.1 | 17.6 | 17.9 |
| 2022-08-01 12:00 AM | 17.9 | 17.7 | 17.1 | 17.6 |
| 2022-08-01 1:00 AM  | 17.6 | 17.6 | 16.9 | 17.4 |
| 2022-08-01 2:00 AM  | 17.6 | 17.5 | 16.9 | 17.3 |
| 2022-08-01 3:00 AM  | 17.6 | 17.7 | 17.0 | 17.4 |
| 2022-08-01 4:00 AM  | 17.6 | 17.7 | 16.9 | 17.4 |
| 2022-08-01 5:00 AM  | 17.6 | 17.8 | 17.0 | 17.5 |
| 2022-08-01 6:00 AM  | 17.6 | 17.8 | 16.9 | 17.4 |
| 2022-08-01 7:00 AM  | 17.7 | 17.9 | 17.2 | 17.6 |
| 2022-08-01 8:00 AM  | 17.9 | 17.9 | 17.3 | 17.7 |
| 2022-08-01 9:00 AM  | 17.9 | 17.7 | 17.1 | 17.6 |
| 2022-08-01 10:00 AM | 18.3 | 17.5 | 17.2 | 17.7 |
| 2022-08-01 11:00 AM | 18.7 | 17.7 | 17.8 | 18.1 |
| 2022-08-01 12:00 PM | 19.1 | 17.9 | 18.2 | 18.4 |
| 2022-08-01 1:00 PM  | 19.5 | 18.3 | 19.2 | 19.0 |
| 2022-08-01 2:00 PM  | 19.4 | 18.4 | 19.1 | 19.0 |
| 2022-08-01 3:00 PM  | 19.4 | 18.7 | 19.3 | 19.1 |
| 2022-08-01 4:00 PM  | 19.4 | 19.0 | 19.5 | 19.3 |
| 2022-08-01 5:00 PM  | 19.4 | 19.4 | 19.8 | 19.5 |
| 2022-08-01 6:00 PM  | 19.1 | 19.6 | 19.8 | 19.5 |
| 2022-08-01 7:00 PM  | 19.0 | 20.5 | 20.4 | 20.0 |
| 2022-08-01 8:00 PM  | 18.4 | 18.7 | 18.7 | 18.6 |
| 2022-08-01 9:00 PM  | 18.0 | 18.3 | 17.8 | 18.0 |
| 2022-08-01 10:00 PM | 17.4 | 17.8 | 16.9 | 17.4 |
| 2022-08-01 11:00 PM | 17.1 | 17.3 | 16.1 | 16.8 |
| 2022-08-02 12:00 AM | 16.7 | 16.9 | 15.6 | 16.4 |
| 2022-08-02 1:00 AM  | 16.3 | 16.4 | 15.1 | 15.9 |
| 2022-08-02 2:00 AM  | 15.9 | 16.1 | 14.7 | 15.6 |

|                     |      |      |      |      |
|---------------------|------|------|------|------|
| 2022-08-02 3:00 AM  | 15.9 | 16.1 | 14.9 | 15.6 |
| 2022-08-02 4:00 AM  | 15.6 | 15.7 | 14.4 | 15.2 |
| 2022-08-02 5:00 AM  | 15.4 | 15.4 | 14.1 | 15.0 |
| 2022-08-02 6:00 AM  | 15.2 | 15.3 | 14.0 | 14.8 |
| 2022-08-02 7:00 AM  | 15.2 | 15.5 | 14.2 | 15.0 |
| 2022-08-02 8:00 AM  | 15.6 | 15.7 | 14.6 | 15.3 |
| 2022-08-02 9:00 AM  | 16.4 | 16.4 | 15.4 | 16.1 |
| 2022-08-02 10:00 AM | 17.4 | 17.3 | 16.9 | 17.2 |
| 2022-08-02 11:00 AM | 18.2 | 18.0 | 18.3 | 18.2 |
| 2022-08-02 12:00 PM | 20.9 | 18.7 | 20.6 | 20.1 |
| 2022-08-02 1:00 PM  | 20.3 | 19.4 | 22.9 | 20.9 |
| 2022-08-02 2:00 PM  | 19.1 | 20.0 | 22.2 | 20.4 |
| 2022-08-02 3:00 PM  | 19.1 | 19.8 | 20.9 | 19.9 |
| 2022-08-02 4:00 PM  | 19.3 | 21.6 | 21.4 | 20.8 |
| 2022-08-02 5:00 PM  | 18.6 | 19.2 | 18.7 | 18.8 |
| 2022-08-02 6:00 PM  | 18.5 | 19.2 | 18.7 | 18.8 |
| 2022-08-02 7:00 PM  | 18.2 | 18.4 | 17.8 | 18.1 |
| 2022-08-02 8:00 PM  | 17.9 | 17.9 | 17.4 | 17.7 |
| 2022-08-02 9:00 PM  | 17.7 | 17.6 | 17.2 | 17.5 |
| 2022-08-02 10:00 PM | 17.6 | 17.6 | 17.0 | 17.4 |
| 2022-08-02 11:00 PM | 17.4 | 17.3 | 16.6 | 17.1 |
| 2022-08-03 12:00 AM | 17.2 | 17.2 | 16.3 | 16.9 |
| 2022-08-03 1:00 AM  | 17.2 | 17.3 | 16.4 | 17.0 |
| 2022-08-03 2:00 AM  | 17.2 | 17.2 | 16.5 | 17.0 |
| 2022-08-03 3:00 AM  | 17.3 | 17.3 | 16.5 | 17.0 |
| 2022-08-03 4:00 AM  | 17.3 | 17.4 | 16.6 | 17.1 |
| 2022-08-03 5:00 AM  | 17.2 | 17.3 | 16.6 | 17.0 |
| 2022-08-03 6:00 AM  | 16.9 | 17.1 | 16.1 | 16.7 |
| 2022-08-03 7:00 AM  | 16.8 | 17.0 | 15.9 | 16.6 |
| 2022-08-03 8:00 AM  | 16.9 | 17.1 | 16.0 | 16.7 |
| 2022-08-03 9:00 AM  | 17.4 | 17.6 | 17.0 | 17.3 |
| 2022-08-03 10:00 AM | 18.2 | 18.5 | 18.5 | 18.4 |
| 2022-08-03 11:00 AM | 19.4 | 19.7 | 20.3 | 19.8 |
| 2022-08-03 12:00 PM | 20.6 | 20.2 | 21.2 | 20.7 |
| 2022-08-03 1:00 PM  | 19.8 | 20.0 | 20.7 | 20.2 |
| 2022-08-03 2:00 PM  | 20.0 | 20.6 | 21.4 | 20.7 |
| 2022-08-03 3:00 PM  | 20.2 | 20.8 | 21.3 | 20.8 |
| 2022-08-03 4:00 PM  | 20.1 | 23.0 | 22.5 | 21.9 |
| 2022-08-03 5:00 PM  | 19.8 | 21.1 | 21.1 | 20.7 |
| 2022-08-03 6:00 PM  | 20.0 | 20.9 | 20.9 | 20.6 |
| 2022-08-03 7:00 PM  | 19.5 | 20.1 | 19.8 | 19.8 |
| 2022-08-03 8:00 PM  | 19.3 | 19.7 | 19.3 | 19.4 |
| 2022-08-03 9:00 PM  | 18.9 | 19.3 | 18.8 | 19.0 |

|                     |      |      |      |      |
|---------------------|------|------|------|------|
| 2022-08-03 10:00 PM | 18.5 | 18.7 | 18.1 | 18.4 |
| 2022-08-03 11:00 PM | 18.1 | 18.2 | 17.6 | 18.0 |
| 2022-08-04 12:00 AM | 18.0 | 18.3 | 17.4 | 17.9 |
| 2022-08-04 1:00 AM  | 17.9 | 18.1 | 17.3 | 17.8 |
| 2022-08-04 2:00 AM  | 17.3 | 17.5 | 16.5 | 17.1 |
| 2022-08-04 3:00 AM  | 17.1 | 17.2 | 16.1 | 16.8 |
| 2022-08-04 4:00 AM  | 16.4 | 16.5 | 15.4 | 16.1 |
| 2022-08-04 5:00 AM  | 16.0 | 16.2 | 14.9 | 15.7 |
| 2022-08-04 6:00 AM  | 15.7 | 15.7 | 14.3 | 15.2 |
| 2022-08-04 7:00 AM  | 15.3 | 15.4 | 14.0 | 14.9 |
| 2022-08-04 8:00 AM  | 15.4 | 15.5 | 14.1 | 15.0 |
| 2022-08-04 9:00 AM  | 16.1 | 16.3 | 15.0 | 15.8 |
| 2022-08-04 10:00 AM | 17.2 | 17.4 | 16.6 | 17.1 |
| 2022-08-04 11:00 AM | 18.2 | 18.1 | 17.9 | 18.1 |
| 2022-08-04 12:00 PM | 19.8 | 18.5 | 19.4 | 19.2 |
| 2022-08-04 1:00 PM  | 19.6 | 19.1 | 21.4 | 20.0 |
| 2022-08-04 2:00 PM  | 18.9 | 19.6 | 21.0 | 19.8 |
| 2022-08-04 3:00 PM  | 18.9 | 19.4 | 20.0 | 19.4 |
| 2022-08-04 4:00 PM  | 19.1 | 21.0 | 21.0 | 20.4 |
| 2022-08-04 5:00 PM  | 18.8 | 19.5 | 19.8 | 19.4 |
| 2022-08-04 6:00 PM  | 18.6 | 19.5 | 19.8 | 19.3 |
| 2022-08-04 7:00 PM  | 18.7 | 20.9 | 20.5 | 20.0 |
| 2022-08-04 8:00 PM  | 18.3 | 19.0 | 18.6 | 18.6 |
| 2022-08-04 9:00 PM  | 18.1 | 18.6 | 18.0 | 18.2 |
| 2022-08-04 10:00 PM | 17.7 | 18.1 | 17.3 | 17.7 |
| 2022-08-04 11:00 PM | 17.2 | 17.5 | 16.6 | 17.1 |
| 2022-08-05 12:00 AM | 16.9 | 17.0 | 16.1 | 16.7 |
| 2022-08-05 1:00 AM  | 16.6 | 16.7 | 15.5 | 16.3 |
| 2022-08-05 2:00 AM  | 16.2 | 16.4 | 15.1 | 15.9 |
| 2022-08-05 3:00 AM  | 16.1 | 16.1 | 14.7 | 15.6 |
| 2022-08-05 4:00 AM  | 15.8 | 15.9 | 14.6 | 15.4 |
| 2022-08-05 5:00 AM  | 15.8 | 16.0 | 14.6 | 15.5 |
| 2022-08-05 6:00 AM  | 15.6 | 15.8 | 14.5 | 15.3 |
| 2022-08-05 7:00 AM  | 15.4 | 15.6 | 14.3 | 15.1 |
| 2022-08-05 8:00 AM  | 16.0 | 16.1 | 15.0 | 15.7 |
| 2022-08-05 9:00 AM  | 16.6 | 16.7 | 15.6 | 16.3 |
| 2022-08-05 10:00 AM | 17.1 | 17.2 | 16.6 | 17.0 |
| 2022-08-05 11:00 AM | 18.1 | 17.9 | 18.2 | 18.1 |
| 2022-08-05 12:00 PM | 20.4 | 18.7 | 21.0 | 20.0 |
| 2022-08-05 1:00 PM  | 20.2 | 19.6 | 24.1 | 21.3 |
| 2022-08-05 2:00 PM  | 19.4 | 20.2 | 23.1 | 20.9 |
| 2022-08-05 3:00 PM  | 19.7 | 20.4 | 22.0 | 20.7 |
| 2022-08-05 4:00 PM  | 19.8 | 21.7 | 22.8 | 21.4 |

|                     |      |      |      |      |
|---------------------|------|------|------|------|
| 2022-08-05 5:00 PM  | 19.6 | 20.8 | 21.8 | 20.7 |
| 2022-08-05 6:00 PM  | 19.4 | 19.9 | 20.4 | 19.9 |
| 2022-08-05 7:00 PM  | 18.9 | 19.2 | 19.0 | 19.0 |
| 2022-08-05 8:00 PM  | 18.8 | 19.2 | 18.9 | 19.0 |
| 2022-08-05 9:00 PM  | 18.7 | 18.9 | 18.5 | 18.7 |
| 2022-08-05 10:00 PM | 18.4 | 18.5 | 18.0 | 18.3 |
| 2022-08-05 11:00 PM | 18.2 | 18.3 | 17.6 | 18.0 |
| 2022-08-06 12:00 AM | 17.8 | 17.7 | 16.9 | 17.5 |
| 2022-08-06 1:00 AM  | 17.8 | 17.9 | 17.1 | 17.6 |
| 2022-08-06 2:00 AM  | 18.0 | 18.1 | 17.5 | 17.9 |
| 2022-08-06 3:00 AM  | 18.1 | 18.2 | 17.6 | 18.0 |
| 2022-08-06 4:00 AM  | 18.1 | 18.3 | 17.6 | 18.0 |
| 2022-08-06 5:00 AM  | 18.2 | 18.4 | 17.8 | 18.1 |
| 2022-08-06 6:00 AM  | 18.3 | 18.6 | 18.3 | 18.4 |
| 2022-08-06 7:00 AM  | 18.3 | 18.5 | 18.1 | 18.3 |
| 2022-08-06 8:00 AM  | 18.3 | 18.6 | 18.2 | 18.4 |
| 2022-08-06 9:00 AM  | 18.7 | 19.0 | 18.8 | 18.8 |
| 2022-08-06 10:00 AM | 19.4 | 19.7 | 20.0 | 19.7 |
| 2022-08-06 11:00 AM | 19.9 | 20.3 | 20.8 | 20.3 |
| 2022-08-06 12:00 PM | 20.4 | 20.6 | 21.3 | 20.8 |
| 2022-08-06 1:00 PM  | 20.6 | 20.7 | 21.6 | 21.0 |
| 2022-08-06 2:00 PM  | 20.5 | 20.8 | 21.7 | 21.0 |
| 2022-08-06 3:00 PM  | 20.5 | 21.0 | 21.8 | 21.1 |
| 2022-08-06 4:00 PM  | 20.5 | 22.2 | 22.6 | 21.8 |
| 2022-08-06 5:00 PM  | 20.2 | 21.1 | 21.5 | 20.9 |
| 2022-08-06 6:00 PM  | 20.5 | 21.5 | 22.1 | 21.4 |
| 2022-08-06 7:00 PM  | 20.4 | 21.3 | 21.8 | 21.2 |
| 2022-08-06 8:00 PM  | 20.0 | 20.2 | 20.6 | 20.3 |
| 2022-08-06 9:00 PM  | 19.6 | 19.8 | 19.8 | 19.7 |
| 2022-08-06 10:00 PM | 19.1 | 19.4 | 18.8 | 19.1 |
| 2022-08-06 11:00 PM | 18.8 | 18.7 | 18.2 | 18.6 |
| 2022-08-07 12:00 AM | 18.2 | 17.7 | 17.3 | 17.7 |
| 2022-08-07 1:00 AM  | 17.7 | 17.3 | 16.6 | 17.2 |
| 2022-08-07 2:00 AM  | 17.5 | 17.0 | 16.3 | 16.9 |
| 2022-08-07 3:00 AM  | 17.3 | 16.9 | 16.1 | 16.8 |
| 2022-08-07 4:00 AM  | 17.1 | 16.6 | 15.9 | 16.5 |
| 2022-08-07 5:00 AM  | 16.8 | 16.6 | 15.7 | 16.4 |
| 2022-08-07 6:00 AM  | 16.6 | 16.2 | 15.3 | 16.0 |
| 2022-08-07 7:00 AM  | 16.4 | 16.1 | 15.1 | 15.9 |
| 2022-08-07 8:00 AM  | 16.4 | 16.0 | 15.1 | 15.8 |
| 2022-08-07 9:00 AM  | 16.7 | 16.1 | 15.5 | 16.1 |
| 2022-08-07 10:00 AM | 17.3 | 16.5 | 16.1 | 16.6 |
| 2022-08-07 11:00 AM | 18.4 | 17.5 | 17.4 | 17.8 |

|                     |      |      |      |      |
|---------------------|------|------|------|------|
| 2022-08-07 12:00 PM | 19.6 | 17.9 | 18.9 | 18.8 |
| 2022-08-07 1:00 PM  | 19.6 | 18.7 | 21.4 | 19.9 |
| 2022-08-07 2:00 PM  | 18.9 | 19.0 | 20.2 | 19.4 |
| 2022-08-07 3:00 PM  | 18.1 | 18.3 | 17.7 | 18.0 |
| 2022-08-07 4:00 PM  | 17.6 | 18.8 | 17.7 | 18.0 |
| 2022-08-07 5:00 PM  | 17.3 | 17.9 | 16.8 | 17.3 |
| 2022-08-07 6:00 PM  | 17.2 | 17.6 | 16.6 | 17.1 |
| 2022-08-07 7:00 PM  | 17.2 | 17.4 | 16.5 | 17.0 |
| 2022-08-07 8:00 PM  | 17.0 | 17.0 | 16.2 | 16.7 |
| 2022-08-07 9:00 PM  | 16.8 | 16.7 | 16.0 | 16.5 |
| 2022-08-07 10:00 PM | 16.5 | 16.4 | 15.5 | 16.1 |
| 2022-08-07 11:00 PM | 16.3 | 16.2 | 15.4 | 16.0 |
| 2022-08-08 12:00 AM | 16.2 | 16.2 | 15.2 | 15.9 |
| 2022-08-08 1:00 AM  | 16.0 | 16.2 | 15.1 | 15.8 |
| 2022-08-08 2:00 AM  | 16.0 | 16.0 | 15.0 | 15.7 |
| 2022-08-08 3:00 AM  | 15.7 | 15.7 | 14.8 | 15.4 |
| 2022-08-08 4:00 AM  | 15.6 | 15.5 | 14.7 | 15.3 |
| 2022-08-08 5:00 AM  | 15.6 | 15.6 | 14.7 | 15.3 |
| 2022-08-08 6:00 AM  | 15.5 | 15.7 | 14.8 | 15.3 |
| 2022-08-08 7:00 AM  | 15.5 | 15.6 | 14.6 | 15.2 |
| 2022-08-08 8:00 AM  | 15.6 | 15.6 | 14.8 | 15.3 |
| 2022-08-08 9:00 AM  | 15.9 | 15.9 | 15.2 | 15.7 |
| 2022-08-08 10:00 AM | 16.5 | 16.4 | 15.8 | 16.2 |
| 2022-08-08 11:00 AM | 17.4 | 17.2 | 17.2 | 17.3 |
| 2022-08-08 12:00 PM | 19.2 | 17.8 | 19.1 | 18.7 |
| 2022-08-08 1:00 PM  | 18.7 | 18.4 | 21.3 | 19.5 |
| 2022-08-08 2:00 PM  | 17.9 | 18.5 | 20.0 | 18.8 |
| 2022-08-08 3:00 PM  | 17.7 | 18.2 | 18.6 | 18.2 |
| 2022-08-08 4:00 PM  | 18.1 | 19.1 | 19.6 | 18.9 |
| 2022-08-08 5:00 PM  | 18.2 | 18.8 | 19.5 | 18.8 |
| 2022-08-08 6:00 PM  | 18.2 | 19.0 | 19.4 | 18.9 |
| 2022-08-08 7:00 PM  | 18.4 | 20.5 | 20.9 | 19.9 |
| 2022-08-08 8:00 PM  | 17.9 | 18.6 | 18.5 | 18.3 |
| 2022-08-08 9:00 PM  | 17.7 | 18.2 | 17.8 | 17.9 |
| 2022-08-08 10:00 PM | 17.3 | 17.6 | 16.9 | 17.3 |
| 2022-08-08 11:00 PM | 16.8 | 17.0 | 16.2 | 16.7 |
| 2022-08-09 12:00 AM | 16.4 | 16.6 | 15.7 | 16.2 |
| 2022-08-09 1:00 AM  | 16.1 | 16.3 | 15.3 | 15.9 |
| 2022-08-09 2:00 AM  | 15.8 | 16.0 | 14.9 | 15.6 |
| 2022-08-09 3:00 AM  | 15.6 | 15.8 | 14.6 | 15.3 |
| 2022-08-09 4:00 AM  | 15.4 | 15.6 | 14.2 | 15.1 |
| 2022-08-09 5:00 AM  | 15.2 | 15.4 | 14.1 | 14.9 |
| 2022-08-09 6:00 AM  | 15.0 | 15.2 | 13.7 | 14.6 |

|                     |      |      |      |      |
|---------------------|------|------|------|------|
| 2022-08-09 7:00 AM  | 14.7 | 14.9 | 13.7 | 14.4 |
| 2022-08-09 8:00 AM  | 14.8 | 14.9 | 13.7 | 14.5 |
| 2022-08-09 9:00 AM  | 15.6 | 15.8 | 14.6 | 15.3 |
| 2022-08-09 10:00 AM | 16.7 | 16.9 | 16.4 | 16.7 |
| 2022-08-09 11:00 AM | 17.7 | 17.8 | 18.1 | 17.9 |
| 2022-08-09 12:00 PM | 19.3 | 18.6 | 20.1 | 19.3 |
| 2022-08-09 1:00 PM  | 19.3 | 19.6 | 22.3 | 20.4 |
| 2022-08-09 2:00 PM  | 18.6 | 19.8 | 21.4 | 19.9 |
| 2022-08-09 3:00 PM  | 18.6 | 19.3 | 20.2 | 19.4 |
| 2022-08-09 4:00 PM  | 18.9 | 20.8 | 21.6 | 20.4 |
| 2022-08-09 5:00 PM  | 19.1 | 19.9 | 20.8 | 19.9 |
| 2022-08-09 6:00 PM  | 19.4 | 20.7 | 21.4 | 20.5 |
| 2022-08-09 7:00 PM  | 19.7 | 22.4 | 23.0 | 21.7 |
| 2022-08-09 8:00 PM  | 19.5 | 20.5 | 21.0 | 20.3 |
| 2022-08-09 9:00 PM  | 19.4 | 20.2 | 20.4 | 20.0 |
| 2022-08-09 10:00 PM | 19.2 | 19.8 | 19.8 | 19.6 |
| 2022-08-09 11:00 PM | 19.0 | 19.6 | 19.4 | 19.3 |
| 2022-08-10 12:00 AM | 18.8 | 19.4 | 18.9 | 19.0 |
| 2022-08-10 1:00 AM  | 18.5 | 19.0 | 18.3 | 18.6 |
| 2022-08-10 2:00 AM  | 18.2 | 18.7 | 17.8 | 18.2 |
| 2022-08-10 3:00 AM  | 17.7 | 18.1 | 17.1 | 17.6 |
| 2022-08-10 4:00 AM  | 17.1 | 17.6 | 16.4 | 17.0 |
| 2022-08-10 5:00 AM  | 16.7 | 17.1 | 15.8 | 16.5 |
| 2022-08-10 6:00 AM  | 16.7 | 17.0 | 15.7 | 16.5 |
| 2022-08-10 7:00 AM  | 16.4 | 16.8 | 15.4 | 16.2 |
| 2022-08-10 8:00 AM  | 16.4 | 16.8 | 15.3 | 16.2 |
| 2022-08-10 9:00 AM  | 16.8 | 17.3 | 16.0 | 16.7 |
| 2022-08-10 10:00 AM | 17.5 | 17.8 | 17.0 | 17.4 |
| 2022-08-10 11:00 AM | 18.6 | 18.6 | 18.7 | 18.6 |
| 2022-08-10 12:00 PM | 20.6 | 19.3 | 20.7 | 20.2 |
| 2022-08-10 1:00 PM  | 20.0 | 19.8 | 21.4 | 20.4 |
| 2022-08-10 2:00 PM  | 18.4 | 19.1 | 19.6 | 19.0 |
| 2022-08-10 3:00 PM  | 18.3 | 19.3 | 19.7 | 19.1 |
| 2022-08-10 4:00 PM  | 18.3 | 20.4 | 20.1 | 19.6 |
| 2022-08-10 5:00 PM  | 18.6 | 19.8 | 20.0 | 19.5 |
| 2022-08-10 6:00 PM  | 18.7 | 20.3 | 20.4 | 19.8 |
| 2022-08-10 7:00 PM  | 18.7 | 20.4 | 20.2 | 19.8 |
| 2022-08-10 8:00 PM  | 18.4 | 19.1 | 18.9 | 18.8 |
| 2022-08-10 9:00 PM  | 18.2 | 18.7 | 18.2 | 18.4 |
| 2022-08-10 10:00 PM | 17.6 | 18.3 | 17.2 | 17.7 |
| 2022-08-10 11:00 PM | 17.2 | 17.7 | 16.5 | 17.1 |
| 2022-08-11 12:00 AM | 16.8 | 17.3 | 15.9 | 16.7 |
| 2022-08-11 1:00 AM  | 16.4 | 16.8 | 15.4 | 16.2 |

|                     |      |      |      |      |
|---------------------|------|------|------|------|
| 2022-08-11 2:00 AM  | 16.0 | 16.5 | 14.8 | 15.8 |
| 2022-08-11 3:00 AM  | 15.6 | 16.2 | 14.5 | 15.4 |
| 2022-08-11 4:00 AM  | 15.4 | 15.7 | 14.1 | 15.1 |
| 2022-08-11 5:00 AM  | 15.0 | 15.3 | 13.6 | 14.6 |
| 2022-08-11 6:00 AM  | 14.8 | 14.9 | 13.2 | 14.3 |
| 2022-08-11 7:00 AM  | 14.3 | 14.5 | 12.8 | 13.9 |
| 2022-08-11 8:00 AM  | 14.1 | 14.4 | 12.8 | 13.8 |
| 2022-08-11 9:00 AM  | 14.7 | 15.2 | 13.6 | 14.5 |
| 2022-08-11 10:00 AM | 15.9 | 16.3 | 15.1 | 15.8 |
| 2022-08-11 11:00 AM | 17.1 | 17.2 | 17.0 | 17.1 |
| 2022-08-11 12:00 PM | 19.3 | 18.0 | 19.5 | 18.9 |
| 2022-08-11 1:00 PM  | 18.8 | 18.9 | 21.6 | 19.8 |
| 2022-08-11 2:00 PM  | 17.9 | 18.9 | 20.0 | 18.9 |
| 2022-08-11 3:00 PM  | 17.6 | 18.4 | 18.5 | 18.2 |
| 2022-08-11 4:00 PM  | 17.8 | 20.2 | 20.1 | 19.4 |
| 2022-08-11 5:00 PM  | 17.8 | 18.8 | 18.8 | 18.5 |
| 2022-08-11 6:00 PM  | 18.0 | 19.1 | 19.4 | 18.8 |
| 2022-08-11 7:00 PM  | 18.2 | 20.9 | 20.4 | 19.8 |
| 2022-08-11 8:00 PM  | 17.7 | 18.6 | 18.3 | 18.2 |
| 2022-08-11 9:00 PM  | 17.4 | 18.0 | 17.5 | 17.6 |
| 2022-08-11 10:00 PM | 16.7 | 17.3 | 16.4 | 16.8 |
| 2022-08-11 11:00 PM | 16.3 | 16.7 | 15.6 | 16.2 |
| 2022-08-12 12:00 AM | 15.8 | 16.1 | 14.9 | 15.6 |
| 2022-08-12 1:00 AM  | 15.3 | 15.6 | 14.2 | 15.0 |
| 2022-08-12 2:00 AM  | 14.9 | 15.2 | 13.8 | 14.6 |
| 2022-08-12 3:00 AM  | 14.5 | 14.8 | 13.3 | 14.2 |
| 2022-08-12 4:00 AM  | 14.1 | 14.5 | 12.8 | 13.8 |
| 2022-08-12 5:00 AM  | 13.8 | 14.2 | 12.4 | 13.5 |
| 2022-08-12 6:00 AM  | 13.4 | 13.9 | 12.0 | 13.1 |
| 2022-08-12 7:00 AM  | 13.2 | 13.5 | 11.9 | 12.9 |
| 2022-08-12 8:00 AM  | 13.2 | 13.5 | 12.0 | 12.9 |
| 2022-08-12 9:00 AM  | 13.6 | 13.9 | 12.4 | 13.3 |
| 2022-08-12 10:00 AM | 15.2 | 15.6 | 14.5 | 15.1 |
| 2022-08-12 11:00 AM | 16.5 | 16.6 | 16.2 | 16.4 |
| 2022-08-12 12:00 PM | 17.4 | 17.0 | 17.5 | 17.3 |
| 2022-08-12 1:00 PM  | 17.5 | 17.7 | 19.4 | 18.2 |
| 2022-08-12 2:00 PM  | 16.9 | 18.0 | 19.0 | 18.0 |
| 2022-08-12 3:00 PM  | 16.8 | 17.6 | 17.8 | 17.4 |
| 2022-08-12 4:00 PM  | 16.8 | 18.8 | 18.4 | 18.0 |
| 2022-08-12 5:00 PM  | 16.8 | 17.7 | 17.6 | 17.4 |
| 2022-08-12 6:00 PM  | 17.2 | 18.1 | 18.3 | 17.9 |
| 2022-08-12 7:00 PM  | 17.2 | 18.2 | 18.0 | 17.8 |
| 2022-08-12 8:00 PM  | 16.8 | 17.1 | 16.7 | 16.9 |



|                     |      |      |      |      |
|---------------------|------|------|------|------|
| 2022-08-12 9:00 PM  | 16.5 | 16.7 | 16.1 | 16.4 |
| 2022-08-12 10:00 PM | 16.2 | 16.4 | 15.6 | 16.1 |
| 2022-08-12 11:00 PM | 15.8 | 16.0 | 15.1 | 15.6 |
| 2022-08-13 12:00 AM | 15.5 | 15.7 | 14.7 | 15.3 |
| 2022-08-13 1:00 AM  | 15.2 | 15.6 | 14.3 | 15.0 |
| 2022-08-13 2:00 AM  | 15.1 | 15.3 | 14.0 | 14.8 |
| 2022-08-13 3:00 AM  | 15.0 | 15.2 | 14.1 | 14.8 |
| 2022-08-13 4:00 AM  | 15.4 | 15.6 | 14.6 | 15.2 |
| 2022-08-13 5:00 AM  | 15.6 | 15.8 | 14.9 | 15.4 |
| 2022-08-13 6:00 AM  | 15.7 | 15.9 | 15.0 | 15.5 |
| 2022-08-13 7:00 AM  | 15.8 | 16.0 | 15.1 | 15.6 |
| 2022-08-13 8:00 AM  | 15.9 | 16.1 | 15.2 | 15.7 |
| 2022-08-13 9:00 AM  | 16.1 | 16.3 | 15.6 | 16.0 |
| 2022-08-13 10:00 AM | 16.4 | 16.7 | 16.2 | 16.4 |
| 2022-08-13 11:00 AM | 16.7 | 16.9 | 16.5 | 16.7 |
| 2022-08-13 12:00 PM | 17.8 | 17.8 | 17.9 | 17.8 |
| 2022-08-13 1:00 PM  | 18.6 | 18.9 | 20.9 | 19.5 |
| 2022-08-13 2:00 PM  | 17.9 | 19.2 | 20.5 | 19.2 |
| 2022-08-13 3:00 PM  | 17.6 | 18.4 | 18.8 | 18.3 |
| 2022-08-13 4:00 PM  | 17.6 | 19.8 | 19.3 | 18.9 |
| 2022-08-13 5:00 PM  | 17.5 | 18.5 | 18.4 | 18.1 |
| 2022-08-13 6:00 PM  | 17.6 | 18.5 | 18.3 | 18.1 |
| 2022-08-13 7:00 PM  | 17.5 | 19.7 | 18.6 | 18.6 |
| 2022-08-13 8:00 PM  | 17.0 | 17.6 | 16.9 | 17.2 |
| 2022-08-13 9:00 PM  | 16.6 | 17.1 | 16.2 | 16.6 |
| 2022-08-13 10:00 PM | 16.6 | 16.9 | 16.0 | 16.5 |
| 2022-08-13 11:00 PM | 16.6 | 16.8 | 16.1 | 16.5 |
| 2022-08-14 12:00 AM | 16.4 | 16.6 | 15.8 | 16.3 |
| 2022-08-14 1:00 AM  | 16.4 | 16.6 | 15.7 | 16.2 |
| 2022-08-14 2:00 AM  | 16.5 | 16.7 | 15.8 | 16.3 |
| 2022-08-14 3:00 AM  | 16.5 | 16.7 | 15.8 | 16.3 |
| 2022-08-14 4:00 AM  | 16.4 | 16.7 | 15.8 | 16.3 |
| 2022-08-14 5:00 AM  | 16.4 | 16.6 | 15.8 | 16.3 |
| 2022-08-14 6:00 AM  | 16.4 | 16.6 | 15.8 | 16.3 |
| 2022-08-14 7:00 AM  | 16.4 | 16.6 | 15.8 | 16.3 |
| 2022-08-14 8:00 AM  | 16.5 | 16.7 | 15.9 | 16.4 |
| 2022-08-14 9:00 AM  | 16.6 | 16.7 | 16.0 | 16.4 |
| 2022-08-14 10:00 AM | 16.7 | 16.8 | 16.0 | 16.5 |
| 2022-08-14 11:00 AM | 16.9 | 17.0 | 16.4 | 16.8 |
| 2022-08-14 12:00 PM | 17.0 | 17.1 | 16.6 | 16.9 |
| 2022-08-14 1:00 PM  | 17.5 | 17.7 | 17.4 | 17.5 |
| 2022-08-14 2:00 PM  | 17.6 | 18.2 | 18.0 | 17.9 |
| 2022-08-14 3:00 PM  | 17.9 | 18.5 | 18.3 | 18.2 |

|                     |      |      |      |      |
|---------------------|------|------|------|------|
| 2022-08-14 4:00 PM  | 18.1 | 18.6 | 18.5 | 18.4 |
| 2022-08-14 5:00 PM  | 18.0 | 18.7 | 18.6 | 18.4 |
| 2022-08-14 6:00 PM  | 17.8 | 18.5 | 18.2 | 18.2 |
| 2022-08-14 7:00 PM  | 17.7 | 18.9 | 18.1 | 18.2 |
| 2022-08-14 8:00 PM  | 17.4 | 17.8 | 17.2 | 17.5 |
| 2022-08-14 9:00 PM  | 17.0 | 17.2 | 16.5 | 16.9 |
| 2022-08-14 10:00 PM | 16.5 | 16.7 | 15.9 | 16.4 |
| 2022-08-14 11:00 PM | 16.1 | 16.3 | 15.5 | 16.0 |
| 2022-08-15 12:00 AM | 16.1 | 16.3 | 15.4 | 15.9 |
| 2022-08-15 1:00 AM  | 16.4 | 16.6 | 15.7 | 16.2 |
| 2022-08-15 2:00 AM  | 16.5 | 16.7 | 15.9 | 16.4 |
| 2022-08-15 3:00 AM  | 16.4 | 16.6 | 15.7 | 16.2 |
| 2022-08-15 4:00 AM  | 16.5 | 16.7 | 15.9 | 16.4 |
| 2022-08-15 5:00 AM  | 16.5 | 16.7 | 15.8 | 16.3 |
| 2022-08-15 6:00 AM  | 16.5 | 16.6 | 15.7 | 16.3 |
| 2022-08-15 7:00 AM  | 16.5 | 16.7 | 15.8 | 16.3 |
| 2022-08-15 8:00 AM  | 16.5 | 16.7 | 15.9 | 16.4 |
| 2022-08-15 9:00 AM  | 16.7 | 16.8 | 16.2 | 16.6 |
| 2022-08-15 10:00 AM | 17.1 | 17.2 | 16.8 | 17.0 |
| 2022-08-15 11:00 AM | 17.7 | 17.8 | 17.7 | 17.7 |
| 2022-08-15 12:00 PM | 19.2 | 18.6 | 19.5 | 19.1 |
| 2022-08-15 1:00 PM  | 19.3 | 19.3 | 21.3 | 20.0 |
| 2022-08-15 2:00 PM  | 18.4 | 19.6 | 20.6 | 19.5 |
| 2022-08-15 3:00 PM  | 19.2 | 18.9 | 18.8 | 19.0 |
| 2022-08-15 4:00 PM  | 18.4 | 19.2 | 18.6 | 18.7 |
| 2022-08-15 5:00 PM  | 18.0 | 18.4 | 18.1 | 18.2 |
| 2022-08-15 6:00 PM  | 18.2 | 18.7 | 18.5 | 18.5 |
| 2022-08-15 7:00 PM  | 18.1 | 19.6 | 19.1 | 18.9 |
| 2022-08-15 8:00 PM  | 17.7 | 18.1 | 17.8 | 17.9 |
| 2022-08-15 9:00 PM  | 17.4 | 17.8 | 17.2 | 17.5 |
| 2022-08-15 10:00 PM | 17.0 | 17.5 | 16.6 | 17.0 |
| 2022-08-15 11:00 PM | 16.5 | 17.0 | 16.0 | 16.5 |
| 2022-08-16 12:00 AM | 16.2 | 16.6 | 15.7 | 16.2 |
| 2022-08-16 1:00 AM  | 15.9 | 16.1 | 15.2 | 15.7 |
| 2022-08-16 2:00 AM  | 15.5 | 15.7 | 14.7 | 15.3 |
| 2022-08-16 3:00 AM  | 15.2 | 15.4 | 14.3 | 15.0 |
| 2022-08-16 4:00 AM  | 14.9 | 15.1 | 13.9 | 14.6 |
| 2022-08-16 5:00 AM  | 14.8 | 14.9 | 13.7 | 14.5 |
| 2022-08-16 6:00 AM  | 14.6 | 14.7 | 13.5 | 14.3 |
| 2022-08-16 7:00 AM  | 14.4 | 14.5 | 13.3 | 14.1 |
| 2022-08-16 8:00 AM  | 14.4 | 14.6 | 13.3 | 14.1 |
| 2022-08-16 9:00 AM  | 15.2 | 15.6 | 14.3 | 15.0 |
| 2022-08-16 10:00 AM | 16.1 | 16.5 | 16.0 | 16.2 |

|                     |      |      |      |      |
|---------------------|------|------|------|------|
| 2022-08-16 11:00 AM | 17.5 | 17.6 | 17.9 | 17.7 |
| 2022-08-16 12:00 PM | 19.1 | 18.4 | 19.9 | 19.1 |
| 2022-08-16 1:00 PM  | 19.0 | 19.2 | 21.7 | 20.0 |
| 2022-08-16 2:00 PM  | 18.2 | 19.4 | 20.8 | 19.5 |
| 2022-08-16 3:00 PM  | 17.9 | 18.8 | 19.5 | 18.7 |
| 2022-08-16 4:00 PM  | 18.0 | 19.5 | 19.8 | 19.1 |
| 2022-08-16 5:00 PM  | 18.1 | 19.1 | 19.4 | 18.9 |
| 2022-08-16 6:00 PM  | 18.4 | 19.4 | 19.6 | 19.1 |
| 2022-08-16 7:00 PM  | 18.2 | 19.8 | 19.5 | 19.2 |
| 2022-08-16 8:00 PM  | 17.7 | 18.3 | 18.0 | 18.0 |
| 2022-08-16 9:00 PM  | 17.7 | 18.0 | 17.5 | 17.7 |
| 2022-08-16 10:00 PM | 17.4 | 17.7 | 17.1 | 17.4 |
| 2022-08-16 11:00 PM | 17.1 | 17.5 | 16.6 | 17.1 |
| 2022-08-17 12:00 AM | 16.9 | 17.3 | 16.3 | 16.8 |
| 2022-08-17 1:00 AM  | 17.0 | 17.3 | 16.5 | 16.9 |
| 2022-08-17 2:00 AM  | 17.2 | 17.5 | 16.7 | 17.1 |
| 2022-08-17 3:00 AM  | 17.2 | 17.5 | 16.8 | 17.2 |
| 2022-08-17 4:00 AM  | 17.2 | 17.5 | 16.7 | 17.1 |
| 2022-08-17 5:00 AM  | 16.9 | 17.3 | 16.3 | 16.8 |
| 2022-08-17 6:00 AM  | 16.7 | 16.9 | 16.1 | 16.6 |
| 2022-08-17 7:00 AM  | 16.7 | 16.9 | 15.9 | 16.5 |
| 2022-08-17 8:00 AM  | 16.8 | 17.0 | 16.2 | 16.7 |
| 2022-08-17 9:00 AM  | 17.2 | 17.4 | 16.8 | 17.1 |
| 2022-08-17 10:00 AM | 17.6 | 17.8 | 17.4 | 17.6 |
| 2022-08-17 11:00 AM | 18.2 | 18.2 | 18.1 | 18.2 |
| 2022-08-17 12:00 PM | 19.0 | 18.7 | 19.0 | 18.9 |
| 2022-08-17 1:00 PM  | 19.6 | 19.6 | 20.2 | 19.8 |
| 2022-08-17 2:00 PM  | 19.8 | 20.1 | 20.9 | 20.3 |
| 2022-08-17 3:00 PM  | 19.9 | 20.2 | 20.9 | 20.3 |
| 2022-08-17 4:00 PM  | 19.7 | 20.6 | 21.0 | 20.4 |
| 2022-08-17 5:00 PM  | 19.4 | 19.7 | 20.2 | 19.8 |
| 2022-08-17 6:00 PM  | 19.1 | 19.3 | 19.3 | 19.2 |
| 2022-08-17 7:00 PM  | 19.1 | 19.5 | 19.4 | 19.3 |
| 2022-08-17 8:00 PM  | 18.7 | 18.8 | 18.6 | 18.7 |
| 2022-08-17 9:00 PM  | 18.5 | 18.5 | 18.1 | 18.4 |
| 2022-08-17 10:00 PM | 18.1 | 18.0 | 17.5 | 17.9 |
| 2022-08-17 11:00 PM | 17.7 | 17.8 | 17.0 | 17.5 |
| 2022-08-18 12:00 AM | 17.5 | 17.6 | 16.7 | 17.3 |
| 2022-08-18 1:00 AM  | 17.5 | 17.5 | 16.7 | 17.2 |
| 2022-08-18 2:00 AM  | 17.7 | 17.8 | 17.0 | 17.5 |
| 2022-08-18 3:00 AM  | 17.5 | 17.7 | 16.8 | 17.3 |
| 2022-08-18 4:00 AM  | 17.3 | 17.5 | 16.6 | 17.1 |
| 2022-08-18 5:00 AM  | 17.1 | 17.3 | 16.2 | 16.9 |

|                     |      |      |      |      |
|---------------------|------|------|------|------|
| 2022-08-18 6:00 AM  | 16.8 | 16.8 | 15.8 | 16.5 |
| 2022-08-18 7:00 AM  | 16.7 | 16.7 | 15.8 | 16.4 |
| 2022-08-18 8:00 AM  | 16.8 | 16.9 | 16.0 | 16.6 |
| 2022-08-18 9:00 AM  | 17.1 | 17.3 | 16.5 | 17.0 |
| 2022-08-18 10:00 AM | 17.8 | 18.1 | 17.8 | 17.9 |
| 2022-08-18 11:00 AM | 18.7 | 19.0 | 19.2 | 19.0 |
| 2022-08-18 12:00 PM | 19.8 | 20.1 | 20.9 | 20.3 |
| 2022-08-18 1:00 PM  | 20.8 | 21.6 | 23.6 | 22.0 |
| 2022-08-18 2:00 PM  | 20.5 | 21.5 | 22.5 | 21.5 |
| 2022-08-18 3:00 PM  | 20.0 | 20.4 | 20.9 | 20.4 |
| 2022-08-18 4:00 PM  | 19.8 | 20.0 | 19.7 | 19.8 |
| 2022-08-18 5:00 PM  | 20.0 | 20.0 | 19.9 | 20.0 |
| 2022-08-18 6:00 PM  | 19.6 | 19.6 | 19.4 | 19.5 |
| 2022-08-18 7:00 PM  | 19.6 | 19.6 | 19.3 | 19.5 |
| 2022-08-18 8:00 PM  | 19.4 | 19.7 | 19.3 | 19.5 |
| 2022-08-18 9:00 PM  | 19.0 | 19.1 | 18.6 | 18.9 |
| 2022-08-18 10:00 PM | 18.5 | 18.7 | 17.8 | 18.3 |
| 2022-08-18 11:00 PM | 18.2 | 18.4 | 17.5 | 18.0 |
| 2022-08-19 12:00 AM | 18.0 | 18.1 | 17.2 | 17.8 |
| 2022-08-19 1:00 AM  | 18.1 | 18.2 | 17.3 | 17.9 |
| 2022-08-19 2:00 AM  | 18.3 | 18.4 | 17.6 | 18.1 |
| 2022-08-19 3:00 AM  | 18.2 | 18.4 | 17.6 | 18.1 |
| 2022-08-19 4:00 AM  | 18.2 | 18.4 | 17.6 | 18.1 |
| 2022-08-19 5:00 AM  | 18.2 | 18.4 | 17.6 | 18.1 |
| 2022-08-19 6:00 AM  | 18.2 | 18.3 | 17.6 | 18.0 |
| 2022-08-19 7:00 AM  | 18.1 | 18.2 | 17.5 | 17.9 |
| 2022-08-19 8:00 AM  | 18.0 | 18.1 | 17.4 | 17.8 |
| 2022-08-19 9:00 AM  | 18.2 | 18.3 | 17.6 | 18.0 |
| 2022-08-19 10:00 AM | 18.4 | 18.5 | 18.0 | 18.3 |
| 2022-08-19 11:00 AM | 18.7 | 18.9 | 18.4 | 18.7 |
| 2022-08-19 12:00 PM | 19.2 | 19.3 | 19.0 | 19.2 |
| 2022-08-19 1:00 PM  | 19.7 | 19.9 | 20.1 | 19.9 |
| 2022-08-19 2:00 PM  | 19.4 | 20.3 | 20.7 | 20.1 |
| 2022-08-19 3:00 PM  | 19.3 | 19.9 | 20.0 | 19.7 |
| 2022-08-19 4:00 PM  | 19.6 | 20.6 | 20.3 | 20.2 |
| 2022-08-19 5:00 PM  | 20.0 | 20.3 | 20.3 | 20.2 |
| 2022-08-19 6:00 PM  | 19.8 | 20.0 | 20.1 | 20.0 |
| 2022-08-19 7:00 PM  | 19.6 | 19.8 | 19.6 | 19.7 |
| 2022-08-19 8:00 PM  | 19.6 | 19.8 | 19.7 | 19.7 |
| 2022-08-19 9:00 PM  | 19.2 | 19.5 | 19.1 | 19.3 |
| 2022-08-19 10:00 PM | 19.0 | 19.1 | 18.7 | 18.9 |
| 2022-08-19 11:00 PM | 18.7 | 18.6 | 18.1 | 18.5 |
| 2022-08-20 12:00 AM | 18.5 | 18.5 | 17.8 | 18.3 |

|                     |      |      |      |      |
|---------------------|------|------|------|------|
| 2022-08-20 1:00 AM  | 18.4 | 18.2 | 17.6 | 18.1 |
| 2022-08-20 2:00 AM  | 18.4 | 18.2 | 17.6 | 18.1 |
| 2022-08-20 3:00 AM  | 18.3 | 18.3 | 17.6 | 18.1 |
| 2022-08-20 4:00 AM  | 18.3 | 18.1 | 17.4 | 17.9 |
| 2022-08-20 5:00 AM  | 18.2 | 18.0 | 17.4 | 17.9 |
| 2022-08-20 6:00 AM  | 18.1 | 17.8 | 17.1 | 17.7 |
| 2022-08-20 7:00 AM  | 17.7 | 17.8 | 16.7 | 17.4 |
| 2022-08-20 8:00 AM  | 17.5 | 17.4 | 16.4 | 17.1 |
| 2022-08-20 9:00 AM  | 17.9 | 17.5 | 16.7 | 17.4 |
| 2022-08-20 10:00 AM | 18.3 | 17.8 | 17.1 | 17.7 |
| 2022-08-20 11:00 AM | 18.9 | 18.7 | 18.2 | 18.6 |
| 2022-08-20 12:00 PM | 19.8 | 19.8 | 19.9 | 19.8 |
| 2022-08-20 1:00 PM  | 19.6 | 19.7 | 19.7 | 19.7 |
| 2022-08-20 2:00 PM  | 19.6 | 20.0 | 20.0 | 19.9 |
| 2022-08-20 3:00 PM  | 19.0 | 19.5 | 19.2 | 19.2 |
| 2022-08-20 4:00 PM  | 18.8 | 20.2 | 19.1 | 19.4 |
| 2022-08-20 5:00 PM  | 18.9 | 19.4 | 18.8 | 19.0 |
| 2022-08-20 6:00 PM  | 19.1 | 20.2 | 19.3 | 19.5 |
| 2022-08-20 7:00 PM  | 19.0 | 20.7 | 19.8 | 19.8 |
| 2022-08-20 8:00 PM  | 18.5 | 19.0 | 18.2 | 18.6 |
| 2022-08-20 9:00 PM  | 18.2 | 18.5 | 17.6 | 18.1 |
| 2022-08-20 10:00 PM | 17.6 | 17.9 | 16.8 | 17.4 |
| 2022-08-20 11:00 PM | 17.2 | 17.4 | 16.1 | 16.9 |
| 2022-08-21 12:00 AM | 16.9 | 16.7 | 15.6 | 16.4 |
| 2022-08-21 1:00 AM  | 16.5 | 16.4 | 15.2 | 16.0 |
| 2022-08-21 2:00 AM  | 16.1 | 16.0 | 14.8 | 15.6 |
| 2022-08-21 3:00 AM  | 15.8 | 15.6 | 14.4 | 15.3 |
| 2022-08-21 4:00 AM  | 15.4 | 15.1 | 13.9 | 14.8 |
| 2022-08-21 5:00 AM  | 15.1 | 14.8 | 13.5 | 14.5 |
| 2022-08-21 6:00 AM  | 14.8 | 14.5 | 13.3 | 14.2 |
| 2022-08-21 7:00 AM  | 14.6 | 14.2 | 13.0 | 13.9 |
| 2022-08-21 8:00 AM  | 14.5 | 14.1 | 13.0 | 13.9 |
| 2022-08-21 9:00 AM  | 15.1 | 15.1 | 13.9 | 14.7 |
| 2022-08-21 10:00 AM | 16.2 | 16.5 | 15.5 | 16.1 |
| 2022-08-21 11:00 AM | 17.5 | 17.7 | 17.6 | 17.6 |
| 2022-08-21 12:00 PM | 18.8 | 18.8 | 19.6 | 19.1 |
| 2022-08-21 1:00 PM  | 18.9 | 19.7 | 21.3 | 20.0 |
| 2022-08-21 2:00 PM  | 18.4 | 19.9 | 20.9 | 19.7 |
| 2022-08-21 3:00 PM  | 18.1 | 19.1 | 19.4 | 18.9 |
| 2022-08-21 4:00 PM  | 18.1 | 20.0 | 19.6 | 19.2 |
| 2022-08-21 5:00 PM  | 18.3 | 19.3 | 19.5 | 19.0 |
| 2022-08-21 6:00 PM  | 18.5 | 20.1 | 19.7 | 19.4 |
| 2022-08-21 7:00 PM  | 18.4 | 20.8 | 20.2 | 19.8 |

|                     |      |      |      |      |
|---------------------|------|------|------|------|
| 2022-08-21 8:00 PM  | 18.2 | 19.1 | 18.9 | 18.7 |
| 2022-08-21 9:00 PM  | 17.9 | 18.6 | 18.0 | 18.2 |
| 2022-08-21 10:00 PM | 17.5 | 18.0 | 17.0 | 17.5 |
| 2022-08-21 11:00 PM | 17.3 | 17.7 | 16.6 | 17.2 |
| 2022-08-22 12:00 AM | 17.1 | 17.3 | 16.2 | 16.9 |
| 2022-08-22 1:00 AM  | 16.8 | 16.9 | 15.8 | 16.5 |
| 2022-08-22 2:00 AM  | 16.5 | 16.6 | 15.4 | 16.2 |
| 2022-08-22 3:00 AM  | 16.3 | 16.3 | 15.2 | 15.9 |
| 2022-08-22 4:00 AM  | 16.1 | 16.2 | 14.9 | 15.7 |
| 2022-08-22 5:00 AM  | 15.8 | 15.8 | 14.7 | 15.4 |
| 2022-08-22 6:00 AM  | 15.8 | 15.8 | 14.8 | 15.5 |
| 2022-08-22 7:00 AM  | 15.7 | 15.7 | 14.6 | 15.3 |
| 2022-08-22 8:00 AM  | 15.6 | 15.6 | 14.6 | 15.3 |
| 2022-08-22 9:00 AM  | 15.9 | 16.0 | 14.9 | 15.6 |
| 2022-08-22 10:00 AM | 17.0 | 17.3 | 16.6 | 17.0 |
| 2022-08-22 11:00 AM | 18.0 | 18.4 | 18.4 | 18.3 |
| 2022-08-22 12:00 PM | 18.9 | 19.4 | 19.8 | 19.4 |
| 2022-08-22 1:00 PM  | 19.0 | 20.1 | 21.1 | 20.1 |
| 2022-08-22 2:00 PM  | 19.1 | 20.2 | 21.0 | 20.1 |
| 2022-08-22 3:00 PM  | 19.0 | 19.9 | 20.3 | 19.7 |
| 2022-08-22 4:00 PM  | 18.9 | 19.6 | 19.8 | 19.4 |
| 2022-08-22 5:00 PM  | 18.5 | 18.8 | 18.6 | 18.6 |
| 2022-08-22 6:00 PM  | 18.8 | 19.2 | 19.0 | 19.0 |
| 2022-08-22 7:00 PM  | 19.0 | 19.7 | 19.7 | 19.5 |
| 2022-08-22 8:00 PM  | 18.9 | 19.4 | 19.4 | 19.2 |
| 2022-08-22 9:00 PM  | 18.7 | 19.0 | 18.7 | 18.8 |
| 2022-08-22 10:00 PM | 18.4 | 18.6 | 18.1 | 18.4 |
| 2022-08-22 11:00 PM | 18.5 | 18.7 | 18.2 | 18.5 |
| 2022-08-23 12:00 AM | 18.4 | 18.7 | 18.1 | 18.4 |
| 2022-08-23 1:00 AM  | 18.4 | 18.4 | 17.9 | 18.2 |
| 2022-08-23 2:00 AM  | 18.3 | 18.4 | 17.8 | 18.2 |
| 2022-08-23 3:00 AM  | 18.3 | 18.5 | 17.9 | 18.2 |
| 2022-08-23 4:00 AM  | 18.3 | 18.5 | 17.9 | 18.2 |
| 2022-08-23 5:00 AM  | 18.2 | 18.4 | 17.8 | 18.1 |
| 2022-08-23 6:00 AM  | 18.1 | 18.2 | 17.5 | 17.9 |
| 2022-08-23 7:00 AM  | 18.0 | 18.0 | 17.3 | 17.8 |
| 2022-08-23 8:00 AM  | 18.0 | 18.0 | 17.2 | 17.7 |
| 2022-08-23 9:00 AM  | 18.1 | 18.2 | 17.5 | 17.9 |
| 2022-08-23 10:00 AM | 18.4 | 18.5 | 17.9 | 18.3 |
| 2022-08-23 11:00 AM | 18.9 | 19.1 | 18.8 | 18.9 |
| 2022-08-23 12:00 PM | 19.1 | 19.4 | 19.2 | 19.2 |
| 2022-08-23 1:00 PM  | 19.4 | 19.9 | 20.1 | 19.8 |
| 2022-08-23 2:00 PM  | 19.8 | 20.7 | 21.1 | 20.5 |

|                     |      |      |      |      |
|---------------------|------|------|------|------|
| 2022-08-23 3:00 PM  | 19.9 | 20.6 | 20.9 | 20.5 |
| 2022-08-23 4:00 PM  | 19.8 | 20.6 | 20.6 | 20.3 |
| 2022-08-23 5:00 PM  | 19.8 | 20.4 | 20.5 | 20.2 |
| 2022-08-23 6:00 PM  | 20.0 | 20.7 | 20.7 | 20.5 |
| 2022-08-23 7:00 PM  | 19.8 | 21.0 | 20.7 | 20.5 |
| 2022-08-23 8:00 PM  | 19.3 | 19.6 | 19.3 | 19.4 |
| 2022-08-23 9:00 PM  | 18.8 | 19.0 | 18.4 | 18.7 |
| 2022-08-23 10:00 PM | 18.6 | 18.8 | 18.0 | 18.5 |
| 2022-08-23 11:00 PM | 18.2 | 18.3 | 17.4 | 18.0 |
| 2022-08-24 12:00 AM | 17.8 | 17.9 | 16.7 | 17.5 |
| 2022-08-24 1:00 AM  | 17.5 | 17.6 | 16.5 | 17.2 |
| 2022-08-24 2:00 AM  | 17.2 | 17.3 | 16.0 | 16.8 |
| 2022-08-24 3:00 AM  | 16.8 | 16.7 | 15.5 | 16.3 |
| 2022-08-24 4:00 AM  | 16.5 | 16.4 | 15.2 | 16.0 |
| 2022-08-24 5:00 AM  | 16.5 | 16.5 | 15.3 | 16.1 |
| 2022-08-24 6:00 AM  | 16.7 | 16.7 | 15.6 | 16.3 |
| 2022-08-24 7:00 AM  | 16.8 | 16.9 | 15.7 | 16.5 |
| 2022-08-24 8:00 AM  | 16.8 | 16.9 | 15.9 | 16.5 |
| 2022-08-24 9:00 AM  | 17.0 | 17.0 | 16.1 | 16.7 |
| 2022-08-24 10:00 AM | 17.3 | 17.1 | 16.4 | 16.9 |
| 2022-08-24 11:00 AM | 17.5 | 17.6 | 16.9 | 17.3 |
| 2022-08-24 12:00 PM | 17.7 | 17.7 | 17.2 | 17.5 |
| 2022-08-24 1:00 PM  | 17.7 | 17.9 | 17.3 | 17.6 |
| 2022-08-24 2:00 PM  | 17.8 | 17.9 | 17.4 | 17.7 |
| 2022-08-24 3:00 PM  | 17.9 | 17.8 | 17.4 | 17.7 |
| 2022-08-24 4:00 PM  | 18.0 | 17.8 | 17.4 | 17.7 |
| 2022-08-24 5:00 PM  | 18.1 | 18.0 | 17.6 | 17.9 |
| 2022-08-24 6:00 PM  | 18.1 | 18.0 | 17.5 | 17.9 |
| 2022-08-24 7:00 PM  | 18.0 | 18.2 | 17.6 | 17.9 |
| 2022-08-24 8:00 PM  | 18.0 | 18.1 | 17.6 | 17.9 |
| 2022-08-24 9:00 PM  | 17.8 | 17.8 | 17.3 | 17.6 |
| 2022-08-24 10:00 PM | 17.6 | 17.7 | 17.1 | 17.5 |
| 2022-08-24 11:00 PM | 17.5 | 17.5 | 16.8 | 17.3 |
| 2022-08-25 12:00 AM | 17.3 | 17.1 | 16.3 | 16.9 |
| 2022-08-25 1:00 AM  | 16.9 | 16.7 | 15.8 | 16.5 |
| 2022-08-25 2:00 AM  | 16.9 | 16.1 | 15.4 | 16.1 |
| 2022-08-25 3:00 AM  | 16.8 | 15.9 | 15.3 | 16.0 |
| 2022-08-25 4:00 AM  | 16.7 | 16.4 | 15.5 | 16.2 |
| 2022-08-25 5:00 AM  | 16.6 | 16.0 | 15.3 | 16.0 |
| 2022-08-25 6:00 AM  | 16.3 | 15.6 | 14.8 | 15.6 |
| 2022-08-25 7:00 AM  | 16.3 | 15.9 | 15.1 | 15.8 |
| 2022-08-25 8:00 AM  | 16.3 | 15.7 | 14.9 | 15.6 |
| 2022-08-25 9:00 AM  | 16.3 | 15.7 | 14.9 | 15.6 |

|                     |      |      |      |      |
|---------------------|------|------|------|------|
| 2022-08-25 10:00 AM | 16.8 | 16.5 | 15.8 | 16.4 |
| 2022-08-25 11:00 AM | 17.2 | 17.0 | 16.6 | 16.9 |
| 2022-08-25 12:00 PM | 17.7 | 17.7 | 17.5 | 17.6 |
| 2022-08-25 1:00 PM  | 18.2 | 18.8 | 19.3 | 18.8 |
| 2022-08-25 2:00 PM  | 18.2 | 19.1 | 19.4 | 18.9 |
| 2022-08-25 3:00 PM  | 18.2 | 18.8 | 18.9 | 18.6 |
| 2022-08-25 4:00 PM  | 18.3 | 19.2 | 19.1 | 18.9 |
| 2022-08-25 5:00 PM  | 18.4 | 18.9 | 18.9 | 18.7 |
| 2022-08-25 6:00 PM  | 18.4 | 18.8 | 18.6 | 18.6 |
| 2022-08-25 7:00 PM  | 18.4 | 18.7 | 18.5 | 18.5 |
| 2022-08-25 8:00 PM  | 18.1 | 18.3 | 17.9 | 18.1 |
| 2022-08-25 9:00 PM  | 17.9 | 18.0 | 17.4 | 17.8 |
| 2022-08-25 10:00 PM | 17.7 | 17.8 | 17.2 | 17.6 |
| 2022-08-25 11:00 PM | 17.6 | 17.7 | 17.0 | 17.4 |
| 2022-08-26 12:00 AM | 17.5 | 17.5 | 16.8 | 17.3 |
| 2022-08-26 1:00 AM  | 17.4 | 17.4 | 16.6 | 17.1 |
| 2022-08-26 2:00 AM  | 17.4 | 17.4 | 16.6 | 17.1 |
| 2022-08-26 3:00 AM  | 17.1 | 17.1 | 16.2 | 16.8 |
| 2022-08-26 4:00 AM  | 16.6 | 16.6 | 15.5 | 16.2 |
| 2022-08-26 5:00 AM  | 16.6 | 16.7 | 15.7 | 16.3 |
| 2022-08-26 6:00 AM  | 16.6 | 16.6 | 15.6 | 16.3 |
| 2022-08-26 7:00 AM  | 16.4 | 16.4 | 15.3 | 16.0 |
| 2022-08-26 8:00 AM  | 16.5 | 16.5 | 15.6 | 16.2 |
| 2022-08-26 9:00 AM  | 16.8 | 16.8 | 16.0 | 16.5 |
| 2022-08-26 10:00 AM | 17.2 | 17.3 | 16.6 | 17.0 |
| 2022-08-26 11:00 AM | 17.8 | 18.0 | 17.7 | 17.8 |
| 2022-08-26 12:00 PM | 18.4 | 18.7 | 18.9 | 18.7 |
| 2022-08-26 1:00 PM  | 18.5 | 19.4 | 19.9 | 19.3 |
| 2022-08-26 2:00 PM  | 18.5 | 19.8 | 20.3 | 19.5 |
| 2022-08-26 3:00 PM  | 18.8 | 19.8 | 20.3 | 19.6 |
| 2022-08-26 4:00 PM  | 18.9 | 20.1 | 20.5 | 19.8 |
| 2022-08-26 5:00 PM  | 19.1 | 20.1 | 20.5 | 19.9 |
| 2022-08-26 6:00 PM  | 19.4 | 20.5 | 21.0 | 20.3 |
| 2022-08-26 7:00 PM  | 19.4 | 21.3 | 21.6 | 20.8 |
| 2022-08-26 8:00 PM  | 19.3 | 20.1 | 20.4 | 19.9 |
| 2022-08-26 9:00 PM  | 19.1 | 19.6 | 19.6 | 19.4 |
| 2022-08-26 10:00 PM | 18.7 | 19.2 | 18.7 | 18.9 |
| 2022-08-26 11:00 PM | 18.5 | 18.9 | 18.2 | 18.5 |
| 2022-08-27 12:00 AM | 18.2 | 18.7 | 17.8 | 18.2 |
| 2022-08-27 1:00 AM  | 18.0 | 18.3 | 17.3 | 17.9 |
| 2022-08-27 2:00 AM  | 17.8 | 18.1 | 17.1 | 17.7 |
| 2022-08-27 3:00 AM  | 17.7 | 18.0 | 16.9 | 17.5 |
| 2022-08-27 4:00 AM  | 17.5 | 17.7 | 16.5 | 17.2 |



|                     |      |      |      |      |
|---------------------|------|------|------|------|
| 2022-08-27 5:00 AM  | 17.3 | 17.4 | 16.3 | 17.0 |
| 2022-08-27 6:00 AM  | 17.0 | 17.1 | 16.0 | 16.7 |
| 2022-08-27 7:00 AM  | 16.8 | 16.9 | 15.7 | 16.5 |
| 2022-08-27 8:00 AM  | 16.7 | 16.6 | 15.5 | 16.3 |
| 2022-08-27 9:00 AM  | 17.0 | 17.2 | 16.1 | 16.8 |
| 2022-08-27 10:00 AM | 17.9 | 18.2 | 17.6 | 17.9 |
| 2022-08-27 11:00 AM | 18.8 | 19.1 | 19.0 | 19.0 |
| 2022-08-27 12:00 PM | 19.1 | 19.6 | 19.9 | 19.5 |
| 2022-08-27 1:00 PM  | 19.3 | 20.0 | 20.7 | 20.0 |
| 2022-08-27 2:00 PM  | 19.1 | 19.7 | 20.0 | 19.6 |
| 2022-08-27 3:00 PM  | 19.1 | 19.8 | 19.9 | 19.6 |
| 2022-08-27 4:00 PM  | 19.0 | 19.3 | 19.2 | 19.2 |
| 2022-08-27 5:00 PM  | 18.7 | 18.9 | 18.5 | 18.7 |
| 2022-08-27 6:00 PM  | 18.8 | 19.0 | 18.5 | 18.8 |
| 2022-08-27 7:00 PM  | 18.7 | 18.9 | 18.4 | 18.7 |
| 2022-08-27 8:00 PM  | 18.6 | 18.8 | 18.3 | 18.6 |
| 2022-08-27 9:00 PM  | 18.6 | 18.8 | 18.3 | 18.6 |
| 2022-08-27 10:00 PM | 18.6 | 18.8 | 18.2 | 18.5 |
| 2022-08-27 11:00 PM | 18.6 | 18.8 | 18.3 | 18.6 |
| 2022-08-28 12:00 AM | 18.5 | 18.7 | 18.1 | 18.4 |
| 2022-08-28 1:00 AM  | 18.4 | 18.6 | 17.9 | 18.3 |
| 2022-08-28 2:00 AM  | 18.5 | 18.7 | 18.2 | 18.5 |
| 2022-08-28 3:00 AM  | 18.5 | 18.7 | 18.3 | 18.5 |
| 2022-08-28 4:00 AM  | 18.5 | 18.7 | 18.3 | 18.5 |
| 2022-08-28 5:00 AM  | 18.5 | 18.7 | 18.3 | 18.5 |
| 2022-08-28 6:00 AM  | 18.5 | 18.8 | 18.4 | 18.6 |
| 2022-08-28 7:00 AM  | 18.3 | 18.6 | 18.0 | 18.3 |
| 2022-08-28 8:00 AM  | 18.3 | 18.5 | 17.9 | 18.2 |
| 2022-08-28 9:00 AM  | 18.5 | 18.7 | 18.2 | 18.5 |
| 2022-08-28 10:00 AM | 18.6 | 18.9 | 18.5 | 18.7 |
| 2022-08-28 11:00 AM | 19.0 | 19.3 | 19.1 | 19.1 |
| 2022-08-28 12:00 PM | 19.4 | 19.8 | 19.9 | 19.7 |
| 2022-08-28 1:00 PM  | 19.7 | 20.3 | 20.5 | 20.2 |
| 2022-08-28 2:00 PM  | 19.6 | 20.1 | 20.2 | 20.0 |
| 2022-08-28 3:00 PM  | 19.7 | 20.2 | 20.4 | 20.1 |
| 2022-08-28 4:00 PM  | 19.9 | 20.4 | 20.6 | 20.3 |
| 2022-08-28 5:00 PM  | 19.7 | 20.0 | 20.0 | 19.9 |
| 2022-08-28 6:00 PM  | 19.6 | 19.9 | 19.8 | 19.8 |
| 2022-08-28 7:00 PM  | 19.7 | 20.0 | 19.8 | 19.8 |
| 2022-08-28 8:00 PM  | 19.6 | 19.9 | 19.7 | 19.7 |
| 2022-08-28 9:00 PM  | 19.4 | 19.5 | 19.1 | 19.3 |
| 2022-08-28 10:00 PM | 19.2 | 19.4 | 18.9 | 19.2 |
| 2022-08-28 11:00 PM | 19.1 | 19.2 | 18.6 | 19.0 |

|                     |      |      |      |      |
|---------------------|------|------|------|------|
| 2022-08-29 12:00 AM | 18.8 | 19.0 | 18.2 | 18.7 |
| 2022-08-29 1:00 AM  | 18.5 | 18.6 | 17.7 | 18.3 |
| 2022-08-29 2:00 AM  | 18.2 | 18.4 | 17.4 | 18.0 |
| 2022-08-29 3:00 AM  | 18.5 | 18.6 | 17.8 | 18.3 |
| 2022-08-29 4:00 AM  | 18.5 | 18.7 | 18.0 | 18.4 |
| 2022-08-29 5:00 AM  | 18.5 | 18.7 | 17.9 | 18.4 |
| 2022-08-29 6:00 AM  | 18.6 | 18.7 | 18.0 | 18.4 |
| 2022-08-29 7:00 AM  | 18.6 | 18.7 | 18.0 | 18.4 |
| 2022-08-29 8:00 AM  | 18.4 | 18.6 | 17.8 | 18.3 |
| 2022-08-29 9:00 AM  | 18.6 | 18.8 | 18.2 | 18.5 |
| 2022-08-29 10:00 AM | 18.9 | 19.1 | 18.6 | 18.9 |
| 2022-08-29 11:00 AM | 19.6 | 19.8 | 19.7 | 19.7 |
| 2022-08-29 12:00 PM | 20.1 | 20.6 | 20.9 | 20.5 |
| 2022-08-29 1:00 PM  | 19.9 | 20.8 | 21.1 | 20.6 |
| 2022-08-29 2:00 PM  | 19.7 | 20.7 | 20.6 | 20.3 |
| 2022-08-29 3:00 PM  | 19.6 | 20.2 | 20.0 | 19.9 |
| 2022-08-29 4:00 PM  | 19.4 | 19.9 | 19.7 | 19.7 |
| 2022-08-29 5:00 PM  | 19.6 | 20.0 | 19.9 | 19.8 |
| 2022-08-29 6:00 PM  | 19.7 | 20.0 | 20.0 | 19.9 |
| 2022-08-29 7:00 PM  | 19.5 | 19.8 | 19.6 | 19.6 |
| 2022-08-29 8:00 PM  | 19.6 | 19.9 | 19.6 | 19.7 |
| 2022-08-29 9:00 PM  | 19.2 | 19.4 | 18.7 | 19.1 |
| 2022-08-29 10:00 PM | 18.9 | 19.1 | 18.2 | 18.7 |
| 2022-08-29 11:00 PM | 18.8 | 18.9 | 17.9 | 18.5 |
| 2022-08-30 12:00 AM | 18.8 | 18.9 | 18.0 | 18.6 |
| 2022-08-30 1:00 AM  | 18.4 | 18.4 | 17.4 | 18.1 |
| 2022-08-30 2:00 AM  | 18.0 | 18.1 | 16.8 | 17.6 |
| 2022-08-30 3:00 AM  | 17.9 | 17.9 | 16.7 | 17.5 |
| 2022-08-30 4:00 AM  | 17.9 | 17.9 | 16.7 | 17.5 |
| 2022-08-30 5:00 AM  | 17.9 | 17.9 | 16.8 | 17.5 |
| 2022-08-30 6:00 AM  | 17.7 | 17.6 | 16.7 | 17.3 |
| 2022-08-30 7:00 AM  | 17.5 | 17.1 | 16.3 | 17.0 |
| 2022-08-30 8:00 AM  | 17.0 | 16.4 | 15.4 | 16.3 |
| 2022-08-30 9:00 AM  | 16.5 | 15.9 | 14.8 | 15.7 |
| 2022-08-30 10:00 AM | 16.7 | 16.3 | 15.3 | 16.1 |
| 2022-08-30 11:00 AM | 17.7 | 17.2 | 16.6 | 17.2 |
| 2022-08-30 12:00 PM | 18.4 | 18.2 | 18.1 | 18.2 |
| 2022-08-30 1:00 PM  | 18.5 | 19.2 | 19.3 | 19.0 |
| 2022-08-30 2:00 PM  | 18.2 | 19.5 | 19.2 | 19.0 |
| 2022-08-30 3:00 PM  | 18.2 | 19.5 | 19.3 | 19.0 |
| 2022-08-30 4:00 PM  | 18.2 | 19.9 | 19.6 | 19.2 |
| 2022-08-30 5:00 PM  | 18.7 | 20.1 | 20.0 | 19.6 |
| 2022-08-30 6:00 PM  | 18.6 | 19.9 | 19.7 | 19.4 |

|                     |      |      |      |      |
|---------------------|------|------|------|------|
| 2022-08-30 7:00 PM  | 18.6 | 20.4 | 20.0 | 19.7 |
| 2022-08-30 8:00 PM  | 18.4 | 19.3 | 18.9 | 18.9 |
| 2022-08-30 9:00 PM  | 18.0 | 18.6 | 17.8 | 18.1 |
| 2022-08-30 10:00 PM | 17.6 | 18.1 | 16.9 | 17.5 |
| 2022-08-30 11:00 PM | 17.3 | 17.8 | 16.4 | 17.2 |
| 2022-08-31 12:00 AM | 17.2 | 17.5 | 16.1 | 16.9 |
| 2022-08-31 1:00 AM  | 17.1 | 17.3 | 15.9 | 16.8 |
| 2022-08-31 2:00 AM  | 16.8 | 17.1 | 15.7 | 16.5 |
| 2022-08-31 3:00 AM  | 16.7 | 16.9 | 15.5 | 16.4 |
| 2022-08-31 4:00 AM  | 16.5 | 16.7 | 15.2 | 16.1 |
| 2022-08-31 5:00 AM  | 16.2 | 16.4 | 14.9 | 15.8 |
| 2022-08-31 6:00 AM  | 15.9 | 16.1 | 14.5 | 15.5 |
| 2022-08-31 7:00 AM  | 15.7 | 15.8 | 14.2 | 15.2 |
| 2022-08-31 8:00 AM  | 15.4 | 15.3 | 13.7 | 14.8 |
| 2022-08-31 9:00 AM  | 15.3 | 15.3 | 13.6 | 14.7 |
| 2022-08-31 10:00 AM | 15.6 | 15.4 | 14.1 | 15.0 |
| 2022-08-31 11:00 AM | 16.7 | 16.2 | 15.3 | 16.1 |
| 2022-08-31 12:00 PM | 17.3 | 17.1 | 16.6 | 17.0 |
| 2022-08-31 1:00 PM  | 17.2 | 17.8 | 17.5 | 17.5 |
| 2022-08-31 2:00 PM  | 16.7 | 17.7 | 16.9 | 17.1 |
| 2022-08-31 3:00 PM  | 16.6 | 17.1 | 16.6 | 16.8 |
| 2022-08-31 4:00 PM  | 16.5 | 16.1 | 17.1 | 16.6 |
| 2022-08-31 5:00 PM  | 16.9 | 16.7 | 18.0 | 17.2 |
| 2022-08-31 6:00 PM  | 17.2 | 17.9 | 19.8 | 18.3 |
| 2022-08-31 7:00 PM  | 17.1 | 18.7 | 19.8 | 18.5 |
| 2022-08-31 8:00 PM  | 16.6 | 17.2 | 17.1 | 17.0 |
| 2022-08-31 9:00 PM  | 16.3 | 16.8 | 15.6 | 16.2 |
| 2022-08-31 10:00 PM | 16.0 | 16.3 | 14.5 | 15.6 |
| 2022-08-31 11:00 PM | 15.8 | 16.1 | 14.2 | 15.4 |
| 2022-09-01 12:00 AM | 15.7 | 16.0 | 14.3 | 15.3 |
| 2022-09-01 1:00 AM  | 16.0 | 16.2 | 14.6 | 15.6 |
| 2022-09-01 2:00 AM  | 16.0 | 16.1 | 14.6 | 15.6 |
| 2022-09-01 3:00 AM  | 15.4 | 15.4 | 13.3 | 14.7 |
| 2022-09-01 4:00 AM  | 15.2 | 15.2 | 13.0 | 14.5 |
| 2022-09-01 5:00 AM  | 15.3 | 15.1 | 13.1 | 14.5 |
| 2022-09-01 6:00 AM  | 15.0 | 14.9 | 12.7 | 14.2 |
| 2022-09-01 7:00 AM  | 14.8 | 14.6 | 12.4 | 13.9 |
| 2022-09-01 8:00 AM  | 14.7 | 14.6 | 12.5 | 13.9 |
| 2022-09-01 9:00 AM  | 15.0 | 15.0 | 13.1 | 14.4 |
| 2022-09-01 10:00 AM | 15.9 | 16.1 | 15.1 | 15.7 |
| 2022-09-01 11:00 AM | 16.7 | 16.7 | 16.6 | 16.7 |
| 2022-09-01 12:00 PM | 17.3 | 17.4 | 17.9 | 17.5 |
| 2022-09-01 1:00 PM  | 17.6 | 18.4 | 19.9 | 18.6 |

|                     |      |      |      |      |
|---------------------|------|------|------|------|
| 2022-09-01 2:00 PM  | 17.3 | 18.5 | 19.4 | 18.4 |
| 2022-09-01 3:00 PM  | 17.2 | 18.0 | 18.3 | 17.8 |
| 2022-09-01 4:00 PM  | 17.3 | 18.0 | 18.2 | 17.8 |
| 2022-09-01 5:00 PM  | 17.5 | 18.1 | 18.2 | 17.9 |
| 2022-09-01 6:00 PM  | 17.8 | 18.7 | 19.4 | 18.6 |
| 2022-09-01 7:00 PM  | 17.7 | 19.3 | 19.9 | 19.0 |
| 2022-09-01 8:00 PM  | 17.5 | 18.2 | 18.2 | 18.0 |
| 2022-09-01 9:00 PM  | 17.3 | 17.7 | 17.2 | 17.4 |
| 2022-09-01 10:00 PM | 17.0 | 17.4 | 16.5 | 17.0 |
| 2022-09-01 11:00 PM | 16.6 | 17.0 | 15.6 | 16.4 |
| 2022-09-02 12:00 AM | 16.3 | 16.5 | 14.8 | 15.9 |
| 2022-09-02 1:00 AM  | 16.0 | 16.2 | 14.3 | 15.5 |
| 2022-09-02 2:00 AM  | 15.8 | 15.9 | 14.0 | 15.2 |
| 2022-09-02 3:00 AM  | 15.7 | 15.8 | 13.8 | 15.1 |
| 2022-09-02 4:00 AM  | 15.6 | 15.7 | 13.7 | 15.0 |
| 2022-09-02 5:00 AM  | 15.5 | 15.5 | 13.5 | 14.8 |
| 2022-09-02 6:00 AM  | 15.4 | 15.5 | 13.5 | 14.8 |
| 2022-09-02 7:00 AM  | 15.3 | 15.4 | 13.4 | 14.7 |
| 2022-09-02 8:00 AM  | 15.6 | 15.8 | 14.1 | 15.2 |
| 2022-09-02 9:00 AM  | 16.1 | 16.4 | 15.5 | 16.0 |
| 2022-09-02 10:00 AM | 16.6 | 17.1 | 17.0 | 16.9 |
| 2022-09-02 11:00 AM | 17.9 | 18.6 | 19.8 | 18.8 |
| 2022-09-02 12:00 PM | 18.2 | 19.1 | 20.5 | 19.3 |
| 2022-09-02 1:00 PM  | 18.3 | 19.3 | 20.5 | 19.4 |
| 2022-09-02 2:00 PM  | 18.8 | 19.9 | 21.4 | 20.0 |
| 2022-09-02 3:00 PM  | 19.2 | 20.3 | 21.8 | 20.4 |
| 2022-09-02 4:00 PM  | 19.4 | 20.4 | 21.9 | 20.6 |
| 2022-09-02 5:00 PM  | 19.3 | 19.8 | 21.5 | 20.2 |
| 2022-09-02 6:00 PM  | 19.0 | 20.1 | 22.2 | 20.4 |
| 2022-09-02 7:00 PM  | 18.8 | 20.3 | 22.0 | 20.4 |
| 2022-09-02 8:00 PM  | 18.2 | 18.9 | 19.9 | 19.0 |
| 2022-09-02 9:00 PM  | 17.9 | 18.5 | 18.6 | 18.3 |
| 2022-09-02 10:00 PM | 17.6 | 18.1 | 17.5 | 17.7 |
| 2022-09-02 11:00 PM | 17.0 | 17.6 | 16.3 | 17.0 |
| 2022-09-03 12:00 AM | 16.6 | 17.1 | 15.5 | 16.4 |
| 2022-09-03 1:00 AM  | 16.2 | 16.6 | 14.8 | 15.9 |
| 2022-09-03 2:00 AM  | 16.1 | 15.8 | 14.4 | 15.4 |
| 2022-09-03 3:00 AM  | 15.6 | 15.0 | 13.4 | 14.7 |
| 2022-09-03 4:00 AM  | 15.0 | 14.4 | 12.4 | 13.9 |
| 2022-09-03 5:00 AM  | 14.4 | 13.7 | 11.4 | 13.2 |
| 2022-09-03 6:00 AM  | 13.6 | 13.4 | 10.6 | 12.5 |
| 2022-09-03 7:00 AM  | 12.9 | 12.7 | 9.4  | 11.7 |
| 2022-09-03 8:00 AM  | 12.6 | 12.4 | 9.2  | 11.4 |

|                     |      |      |      |      |
|---------------------|------|------|------|------|
| 2022-09-03 9:00 AM  | 13.0 | 12.4 | 9.9  | 11.8 |
| 2022-09-03 10:00 AM | 13.8 | 12.8 | 11.1 | 12.6 |
| 2022-09-03 11:00 AM | 14.8 | 13.4 | 12.5 | 13.6 |
| 2022-09-03 12:00 PM | 15.4 | 14.5 | 14.2 | 14.7 |
| 2022-09-03 1:00 PM  | 15.5 | 15.6 | 15.6 | 15.6 |
| 2022-09-03 2:00 PM  | 15.2 | 15.5 | 15.1 | 15.3 |
| 2022-09-03 3:00 PM  | 15.2 | 15.6 | 15.0 | 15.3 |
| 2022-09-03 4:00 PM  | 15.5 | 16.0 | 15.6 | 15.7 |
| 2022-09-03 5:00 PM  | 15.8 | 16.0 | 15.7 | 15.8 |
| 2022-09-03 6:00 PM  | 15.9 | 16.6 | 16.2 | 16.2 |
| 2022-09-03 7:00 PM  | 15.6 | 16.6 | 15.7 | 16.0 |
| 2022-09-03 8:00 PM  | 15.3 | 15.7 | 14.7 | 15.2 |
| 2022-09-03 9:00 PM  | 14.7 | 15.0 | 13.3 | 14.3 |
| 2022-09-03 10:00 PM | 14.1 | 14.0 | 12.1 | 13.4 |
| 2022-09-03 11:00 PM | 13.7 | 13.6 | 11.3 | 12.9 |
| 2022-09-04 12:00 AM | 13.0 | 13.2 | 10.7 | 12.3 |
| 2022-09-04 1:00 AM  | 12.5 | 12.7 | 10.1 | 11.8 |
| 2022-09-04 2:00 AM  | 12.0 | 11.9 | 8.9  | 10.9 |
| 2022-09-04 3:00 AM  | 11.6 | 11.3 | 8.4  | 10.4 |
| 2022-09-04 4:00 AM  | 11.1 | 10.9 | 7.6  | 9.9  |
| 2022-09-04 5:00 AM  | 10.8 | 10.4 | 7.2  | 9.5  |
| 2022-09-04 6:00 AM  | 10.4 | 10.3 | 6.8  | 9.2  |
| 2022-09-04 7:00 AM  | 9.8  | 9.6  | 6.1  | 8.5  |
| 2022-09-04 8:00 AM  | 9.8  | 9.6  | 6.1  | 8.5  |
| 2022-09-04 9:00 AM  | 10.4 | 10.2 | 7.4  | 9.3  |
| 2022-09-04 10:00 AM | 11.8 | 12.1 | 10.1 | 11.3 |
| 2022-09-04 11:00 AM | 13.8 | 13.9 | 13.9 | 13.9 |
| 2022-09-04 12:00 PM | 14.9 | 15.4 | 16.9 | 15.7 |
| 2022-09-04 1:00 PM  | 15.2 | 16.3 | 18.2 | 16.6 |
| 2022-09-04 2:00 PM  | 14.8 | 16.1 | 16.8 | 15.9 |
| 2022-09-04 3:00 PM  | 14.7 | 15.6 | 15.9 | 15.4 |
| 2022-09-04 4:00 PM  | 14.8 | 15.6 | 16.0 | 15.5 |
| 2022-09-04 5:00 PM  | 14.9 | 15.5 | 15.5 | 15.3 |
| 2022-09-04 6:00 PM  | 15.1 | 16.1 | 15.7 | 15.6 |
| 2022-09-04 7:00 PM  | 14.8 | 16.0 | 15.2 | 15.3 |
| 2022-09-04 8:00 PM  | 14.5 | 14.9 | 14.1 | 14.5 |
| 2022-09-04 9:00 PM  | 13.8 | 14.2 | 12.6 | 13.5 |
| 2022-09-04 10:00 PM | 13.1 | 13.4 | 11.4 | 12.6 |
| 2022-09-04 11:00 PM | 12.7 | 12.7 | 10.6 | 12.0 |
| 2022-09-05 12:00 AM | 12.1 | 12.2 | 9.8  | 11.4 |
| 2022-09-05 1:00 AM  | 11.6 | 11.7 | 9.1  | 10.8 |
| 2022-09-05 2:00 AM  | 11.2 | 11.4 | 8.6  | 10.4 |
| 2022-09-05 3:00 AM  | 11.0 | 10.9 | 8.1  | 10.0 |

|                     |      |      |      |      |
|---------------------|------|------|------|------|
| 2022-09-05 4:00 AM  | 10.7 | 10.4 | 7.7  | 9.6  |
| 2022-09-05 5:00 AM  | 10.2 | 10.2 | 7.0  | 9.1  |
| 2022-09-05 6:00 AM  | 9.7  | 9.5  | 6.2  | 8.5  |
| 2022-09-05 7:00 AM  | 9.6  | 9.3  | 6.1  | 8.3  |
| 2022-09-05 8:00 AM  | 9.2  | 9.0  | 5.6  | 7.9  |
| 2022-09-05 9:00 AM  | 9.6  | 9.8  | 7.0  | 8.8  |
| 2022-09-05 10:00 AM | 11.1 | 11.4 | 9.6  | 10.7 |
| 2022-09-05 11:00 AM | 13.2 | 13.3 | 13.5 | 13.3 |
| 2022-09-05 12:00 PM | 14.3 | 14.7 | 16.2 | 15.1 |
| 2022-09-05 1:00 PM  | 14.7 | 15.8 | 17.9 | 16.1 |
| 2022-09-05 2:00 PM  | 14.3 | 15.8 | 16.6 | 15.6 |
| 2022-09-05 3:00 PM  | 14.2 | 15.2 | 15.8 | 15.1 |
| 2022-09-05 4:00 PM  | 14.4 | 15.4 | 16.4 | 15.4 |
| 2022-09-05 5:00 PM  | 14.8 | 15.6 | 16.4 | 15.6 |
| 2022-09-05 6:00 PM  | 15.0 | 16.2 | 16.5 | 15.9 |
| 2022-09-05 7:00 PM  | 14.8 | 16.3 | 16.2 | 15.8 |
| 2022-09-05 8:00 PM  | 14.6 | 15.4 | 15.1 | 15.0 |
| 2022-09-05 9:00 PM  | 14.1 | 14.8 | 13.7 | 14.2 |
| 2022-09-05 10:00 PM | 13.7 | 14.2 | 12.6 | 13.5 |
| 2022-09-05 11:00 PM | 13.3 | 13.7 | 12.0 | 13.0 |
| 2022-09-06 12:00 AM | 12.9 | 13.3 | 11.5 | 12.6 |
| 2022-09-06 1:00 AM  | 12.7 | 13.0 | 11.0 | 12.2 |
| 2022-09-06 2:00 AM  | 12.3 | 12.5 | 10.4 | 11.7 |
| 2022-09-06 3:00 AM  | 12.1 | 12.2 | 10.1 | 11.5 |
| 2022-09-06 4:00 AM  | 11.8 | 11.9 | 9.6  | 11.1 |
| 2022-09-06 5:00 AM  | 11.4 | 11.5 | 8.9  | 10.6 |
| 2022-09-06 6:00 AM  | 10.9 | 11.0 | 8.1  | 10.0 |
| 2022-09-06 7:00 AM  | 10.6 | 10.6 | 7.7  | 9.6  |
| 2022-09-06 8:00 AM  | 10.5 | 10.5 | 7.6  | 9.5  |
| 2022-09-06 9:00 AM  | 10.8 | 11.0 | 8.4  | 10.1 |
| 2022-09-06 10:00 AM | 12.1 | 12.5 | 11.1 | 11.9 |
| 2022-09-06 11:00 AM | 14.0 | 14.2 | 14.6 | 14.3 |
| 2022-09-06 12:00 PM | 15.1 | 15.7 | 17.4 | 16.1 |
| 2022-09-06 1:00 PM  | 15.5 | 16.9 | 19.0 | 17.1 |
| 2022-09-06 2:00 PM  | 15.4 | 16.7 | 17.6 | 16.6 |
| 2022-09-06 3:00 PM  | 15.4 | 16.4 | 16.8 | 16.2 |
| 2022-09-06 4:00 PM  | 15.7 | 16.7 | 18.3 | 16.9 |
| 2022-09-06 5:00 PM  | 16.2 | 17.2 | 19.1 | 17.5 |
| 2022-09-06 6:00 PM  | 16.4 | 17.6 | 18.9 | 17.6 |
| 2022-09-06 7:00 PM  | 16.3 | 17.5 | 18.5 | 17.4 |
| 2022-09-06 8:00 PM  | 16.1 | 16.9 | 17.5 | 16.8 |
| 2022-09-06 9:00 PM  | 15.8 | 16.5 | 16.3 | 16.2 |
| 2022-09-06 10:00 PM | 15.6 | 16.1 | 15.5 | 15.7 |

|                     |      |      |      |      |
|---------------------|------|------|------|------|
| 2022-09-06 11:00 PM | 15.6 | 15.9 | 15.3 | 15.6 |
| 2022-09-07 12:00 AM | 15.5 | 15.8 | 15.0 | 15.4 |
| 2022-09-07 1:00 AM  | 15.1 | 15.5 | 14.5 | 15.0 |
| 2022-09-07 2:00 AM  | 14.9 | 15.2 | 14.0 | 14.7 |
| 2022-09-07 3:00 AM  | 14.5 | 14.9 | 13.3 | 14.2 |
| 2022-09-07 4:00 AM  | 14.3 | 14.7 | 13.0 | 14.0 |
| 2022-09-07 5:00 AM  | 14.2 | 14.5 | 12.8 | 13.8 |
| 2022-09-07 6:00 AM  | 14.0 | 14.4 | 12.6 | 13.7 |
| 2022-09-07 7:00 AM  | 13.7 | 14.1 | 12.3 | 13.4 |
| 2022-09-07 8:00 AM  | 13.4 | 13.7 | 11.8 | 13.0 |
| 2022-09-07 9:00 AM  | 13.7 | 14.1 | 12.4 | 13.4 |
| 2022-09-07 10:00 AM | 14.7 | 15.1 | 14.5 | 14.8 |
| 2022-09-07 11:00 AM | 16.1 | 16.4 | 16.8 | 16.4 |
| 2022-09-07 12:00 PM | 16.8 | 17.7 | 19.4 | 18.0 |
| 2022-09-07 1:00 PM  | 17.2 | 18.7 | 21.5 | 19.1 |
| 2022-09-07 2:00 PM  | 16.7 | 18.5 | 20.0 | 18.4 |
| 2022-09-07 3:00 PM  | 16.5 | 17.9 | 19.0 | 17.8 |
| 2022-09-07 4:00 PM  | 16.7 | 18.1 | 20.2 | 18.3 |
| 2022-09-07 5:00 PM  | 17.0 | 18.2 | 20.0 | 18.4 |
| 2022-09-07 6:00 PM  | 17.1 | 18.7 | 20.4 | 18.7 |
| 2022-09-07 7:00 PM  | 16.9 | 18.5 | 19.6 | 18.3 |
| 2022-09-07 8:00 PM  | 16.5 | 17.5 | 17.7 | 17.2 |
| 2022-09-07 9:00 PM  | 15.8 | 16.6 | 15.7 | 16.0 |
| 2022-09-07 10:00 PM | 15.3 | 15.8 | 14.5 | 15.2 |
| 2022-09-07 11:00 PM | 14.8 | 15.2 | 13.6 | 14.5 |
| 2022-09-08 12:00 AM | 14.3 | 14.7 | 12.8 | 13.9 |
| 2022-09-08 1:00 AM  | 13.9 | 14.1 | 12.2 | 13.4 |
| 2022-09-08 2:00 AM  | 13.6 | 13.5 | 11.5 | 12.9 |
| 2022-09-08 3:00 AM  | 13.2 | 13.0 | 11.0 | 12.4 |
| 2022-09-08 4:00 AM  | 12.7 | 12.9 | 10.5 | 12.0 |
| 2022-09-08 5:00 AM  | 12.4 | 12.7 | 10.2 | 11.8 |
| 2022-09-08 6:00 AM  | 12.2 | 12.4 | 9.9  | 11.5 |
| 2022-09-08 7:00 AM  | 12.2 | 12.6 | 10.2 | 11.7 |
| 2022-09-08 8:00 AM  | 12.4 | 12.6 | 10.5 | 11.8 |
| 2022-09-08 9:00 AM  | 13.0 | 13.2 | 11.5 | 12.6 |
| 2022-09-08 10:00 AM | 14.4 | 14.7 | 14.4 | 14.5 |
| 2022-09-08 11:00 AM | 15.5 | 16.0 | 16.7 | 16.1 |
| 2022-09-08 12:00 PM | 16.6 | 17.3 | 19.4 | 17.8 |
| 2022-09-08 1:00 PM  | 17.3 | 18.4 | 21.0 | 18.9 |
| 2022-09-08 2:00 PM  | 17.6 | 18.6 | 20.6 | 18.9 |
| 2022-09-08 3:00 PM  | 17.6 | 18.3 | 19.8 | 18.6 |
| 2022-09-08 4:00 PM  | 17.9 | 18.7 | 20.6 | 19.1 |
| 2022-09-08 5:00 PM  | 18.0 | 18.6 | 20.2 | 18.9 |

|                     |      |      |      |      |
|---------------------|------|------|------|------|
| 2022-09-08 6:00 PM  | 18.0 | 18.4 | 19.7 | 18.7 |
| 2022-09-08 7:00 PM  | 17.8 | 18.3 | 19.1 | 18.4 |
| 2022-09-08 8:00 PM  | 17.7 | 18.1 | 18.7 | 18.2 |
| 2022-09-08 9:00 PM  | 17.5 | 17.9 | 18.0 | 17.8 |
| 2022-09-08 10:00 PM | 17.5 | 17.9 | 18.0 | 17.8 |
| 2022-09-08 11:00 PM | 17.5 | 17.8 | 17.8 | 17.7 |
| 2022-09-09 12:00 AM | 17.5 | 17.8 | 17.8 | 17.7 |
| 2022-09-09 1:00 AM  | 17.4 | 17.7 | 17.6 | 17.6 |
| 2022-09-09 2:00 AM  | 17.4 | 17.7 | 17.6 | 17.6 |
| 2022-09-09 3:00 AM  | 17.4 | 17.8 | 17.6 | 17.6 |
| 2022-09-09 4:00 AM  | 17.5 | 17.9 | 17.9 | 17.8 |
| 2022-09-09 5:00 AM  | 17.4 | 17.7 | 17.6 | 17.6 |
| 2022-09-09 6:00 AM  | 17.3 | 17.6 | 17.3 | 17.4 |
| 2022-09-09 7:00 AM  | 17.2 | 17.4 | 17.0 | 17.2 |
| 2022-09-09 8:00 AM  | 17.0 | 17.2 | 16.5 | 16.9 |
| 2022-09-09 9:00 AM  | 16.8 | 16.9 | 16.2 | 16.6 |
| 2022-09-09 10:00 AM | 16.8 | 16.8 | 16.1 | 16.6 |
| 2022-09-09 11:00 AM | 16.8 | 16.7 | 16.0 | 16.5 |
| 2022-09-09 12:00 PM | 16.5 | 16.5 | 15.6 | 16.2 |
| 2022-09-09 1:00 PM  | 16.3 | 16.0 | 15.2 | 15.8 |
| 2022-09-09 2:00 PM  | 16.4 | 15.8 | 15.2 | 15.8 |
| 2022-09-09 3:00 PM  | 16.4 | 16.1 | 15.3 | 15.9 |
| 2022-09-09 4:00 PM  | 16.5 | 16.1 | 15.1 | 15.9 |
| 2022-09-09 5:00 PM  | 16.4 | 16.1 | 15.3 | 15.9 |
| 2022-09-09 6:00 PM  | 16.3 | 16.0 | 15.3 | 15.9 |
| 2022-09-09 7:00 PM  | 16.3 | 16.2 | 15.3 | 15.9 |
| 2022-09-09 8:00 PM  | 16.0 | 16.0 | 15.0 | 15.7 |
| 2022-09-09 9:00 PM  | 15.7 | 15.7 | 14.6 | 15.3 |
| 2022-09-09 10:00 PM | 15.7 | 15.7 | 14.6 | 15.3 |
| 2022-09-09 11:00 PM | 15.5 | 15.5 | 14.4 | 15.1 |
| 2022-09-10 12:00 AM | 15.5 | 15.5 | 14.4 | 15.1 |
| 2022-09-10 1:00 AM  | 15.3 | 15.3 | 14.2 | 14.9 |
| 2022-09-10 2:00 AM  | 15.3 | 15.2 | 14.1 | 14.9 |
| 2022-09-10 3:00 AM  | 15.3 | 15.2 | 14.1 | 14.9 |
| 2022-09-10 4:00 AM  | 15.1 | 15.1 | 13.8 | 14.7 |
| 2022-09-10 5:00 AM  | 15.0 | 15.1 | 13.8 | 14.6 |
| 2022-09-10 6:00 AM  | 14.5 | 14.6 | 13.0 | 14.0 |
| 2022-09-10 7:00 AM  | 14.5 | 14.5 | 13.0 | 14.0 |
| 2022-09-10 8:00 AM  | 14.2 | 14.1 | 12.5 | 13.6 |
| 2022-09-10 9:00 AM  | 14.4 | 14.4 | 12.9 | 13.9 |
| 2022-09-10 10:00 AM | 15.1 | 15.2 | 14.2 | 14.8 |
| 2022-09-10 11:00 AM | 15.5 | 15.5 | 15.0 | 15.3 |
| 2022-09-10 12:00 PM | 15.9 | 16.1 | 15.8 | 15.9 |



|                     |      |      |      |      |
|---------------------|------|------|------|------|
| 2022-09-10 1:00 PM  | 16.2 | 16.5 | 16.6 | 16.4 |
| 2022-09-10 2:00 PM  | 16.3 | 16.5 | 16.7 | 16.5 |
| 2022-09-10 3:00 PM  | 16.4 | 16.7 | 16.8 | 16.6 |
| 2022-09-10 4:00 PM  | 16.4 | 16.8 | 16.9 | 16.7 |
| 2022-09-10 5:00 PM  | 16.4 | 16.6 | 16.5 | 16.5 |
| 2022-09-10 6:00 PM  | 16.1 | 16.3 | 16.0 | 16.1 |
| 2022-09-10 7:00 PM  | 16.0 | 16.3 | 16.0 | 16.1 |
| 2022-09-10 8:00 PM  | 15.7 | 16.0 | 15.4 | 15.7 |
| 2022-09-10 9:00 PM  | 15.1 | 15.2 | 14.0 | 14.8 |
| 2022-09-10 10:00 PM | 14.7 | 14.6 | 13.2 | 14.2 |
| 2022-09-10 11:00 PM | 14.3 | 14.3 | 12.6 | 13.7 |
| 2022-09-11 12:00 AM | 14.1 | 14.2 | 12.5 | 13.6 |
| 2022-09-11 1:00 AM  | 13.8 | 13.8 | 12.0 | 13.2 |
| 2022-09-11 2:00 AM  | 13.3 | 13.2 | 11.3 | 12.6 |
| 2022-09-11 3:00 AM  | 12.9 | 12.7 | 10.6 | 12.1 |
| 2022-09-11 4:00 AM  | 12.5 | 12.2 | 10.1 | 11.6 |
| 2022-09-11 5:00 AM  | 12.1 | 11.8 | 9.5  | 11.1 |
| 2022-09-11 6:00 AM  | 11.9 | 11.6 | 9.2  | 10.9 |
| 2022-09-11 7:00 AM  | 11.6 | 11.2 | 9.0  | 10.6 |
| 2022-09-11 8:00 AM  | 11.4 | 11.0 | 8.8  | 10.4 |
| 2022-09-11 9:00 AM  | 11.5 | 11.3 | 9.0  | 10.6 |
| 2022-09-11 10:00 AM | 12.7 | 12.8 | 11.1 | 12.2 |
| 2022-09-11 11:00 AM | 14.1 | 14.2 | 13.6 | 14.0 |
| 2022-09-11 12:00 PM | 15.0 | 15.5 | 16.3 | 15.6 |
| 2022-09-11 1:00 PM  | 15.2 | 16.2 | 17.7 | 16.4 |
| 2022-09-11 2:00 PM  | 15.0 | 16.1 | 16.7 | 15.9 |
| 2022-09-11 3:00 PM  | 15.2 | 16.2 | 16.9 | 16.1 |
| 2022-09-11 4:00 PM  | 15.4 | 16.6 | 17.4 | 16.5 |
| 2022-09-11 5:00 PM  | 15.6 | 16.5 | 17.1 | 16.4 |
| 2022-09-11 6:00 PM  | 15.7 | 16.4 | 16.8 | 16.3 |
| 2022-09-11 7:00 PM  | 15.5 | 16.3 | 16.5 | 16.1 |
| 2022-09-11 8:00 PM  | 15.3 | 15.9 | 15.7 | 15.6 |
| 2022-09-11 9:00 PM  | 14.8 | 15.3 | 14.3 | 14.8 |
| 2022-09-11 10:00 PM | 14.4 | 14.7 | 13.4 | 14.2 |
| 2022-09-11 11:00 PM | 14.0 | 14.3 | 12.7 | 13.7 |
| 2022-09-12 12:00 AM | 13.6 | 13.8 | 12.0 | 13.1 |
| 2022-09-12 1:00 AM  | 13.1 | 13.2 | 11.2 | 12.5 |
| 2022-09-12 2:00 AM  | 12.8 | 12.6 | 10.7 | 12.0 |
| 2022-09-12 3:00 AM  | 12.2 | 12.1 | 9.9  | 11.4 |
| 2022-09-12 4:00 AM  | 11.9 | 11.7 | 9.5  | 11.0 |
| 2022-09-12 5:00 AM  | 11.7 | 11.4 | 9.2  | 10.8 |
| 2022-09-12 6:00 AM  | 11.4 | 11.2 | 9.0  | 10.5 |
| 2022-09-12 7:00 AM  | 11.1 | 10.9 | 8.6  | 10.2 |

|                     |      |      |      |      |
|---------------------|------|------|------|------|
| 2022-09-12 8:00 AM  | 10.9 | 10.6 | 8.3  | 9.9  |
| 2022-09-12 9:00 AM  | 11.2 | 11.0 | 8.8  | 10.3 |
| 2022-09-12 10:00 AM | 12.6 | 12.7 | 11.2 | 12.2 |
| 2022-09-12 11:00 AM | 13.9 | 14.0 | 13.6 | 13.8 |
| 2022-09-12 12:00 PM | 14.6 | 15.1 | 15.9 | 15.2 |
| 2022-09-12 1:00 PM  | 15.0 | 16.3 | 17.6 | 16.3 |
| 2022-09-12 2:00 PM  | 15.0 | 16.4 | 17.6 | 16.3 |
| 2022-09-12 3:00 PM  | 15.0 | 16.2 | 17.5 | 16.2 |
| 2022-09-12 4:00 PM  | 15.2 | 16.4 | 17.2 | 16.3 |
| 2022-09-12 5:00 PM  | 15.4 | 16.2 | 16.4 | 16.0 |
| 2022-09-12 6:00 PM  | 15.5 | 16.3 | 16.8 | 16.2 |
| 2022-09-12 7:00 PM  | 15.5 | 16.2 | 16.6 | 16.1 |
| 2022-09-12 8:00 PM  | 15.4 | 15.9 | 16.0 | 15.8 |
| 2022-09-12 9:00 PM  | 15.0 | 15.5 | 14.9 | 15.1 |
| 2022-09-12 10:00 PM | 14.7 | 15.1 | 14.0 | 14.6 |
| 2022-09-12 11:00 PM | 14.3 | 14.7 | 13.3 | 14.1 |
| 2022-09-13 12:00 AM | 13.9 | 14.2 | 12.7 | 13.6 |
| 2022-09-13 1:00 AM  | 13.7 | 13.7 | 12.2 | 13.2 |
| 2022-09-13 2:00 AM  | 13.3 | 13.4 | 11.7 | 12.8 |
| 2022-09-13 3:00 AM  | 13.0 | 13.0 | 11.3 | 12.4 |
| 2022-09-13 4:00 AM  | 12.5 | 12.7 | 10.6 | 11.9 |
| 2022-09-13 5:00 AM  | 12.3 | 12.4 | 10.4 | 11.7 |
| 2022-09-13 6:00 AM  | 12.0 | 12.0 | 10.0 | 11.3 |
| 2022-09-13 7:00 AM  | 12.1 | 12.2 | 10.2 | 11.5 |
| 2022-09-13 8:00 AM  | 12.1 | 12.3 | 10.3 | 11.6 |
| 2022-09-13 9:00 AM  | 12.8 | 13.1 | 11.5 | 12.5 |
| 2022-09-13 10:00 AM | 13.8 | 14.0 | 13.3 | 13.7 |
| 2022-09-13 11:00 AM | 14.8 | 15.1 | 14.9 | 14.9 |
| 2022-09-13 12:00 PM | 15.1 | 16.2 | 16.5 | 15.9 |
| 2022-09-13 1:00 PM  | 15.3 | 16.9 | 17.1 | 16.4 |
| 2022-09-13 2:00 PM  | 15.3 | 16.7 | 16.5 | 16.2 |
| 2022-09-13 3:00 PM  | 15.3 | 16.8 | 16.7 | 16.3 |
| 2022-09-13 4:00 PM  | 15.5 | 16.8 | 16.6 | 16.3 |
| 2022-09-13 5:00 PM  | 15.5 | 16.3 | 16.1 | 16.0 |
| 2022-09-13 6:00 PM  | 15.2 | 15.7 | 15.3 | 15.4 |
| 2022-09-13 7:00 PM  | 15.1 | 15.4 | 15.0 | 15.2 |
| 2022-09-13 8:00 PM  | 14.6 | 15.0 | 14.1 | 14.6 |
| 2022-09-13 9:00 PM  | 13.9 | 14.1 | 12.4 | 13.5 |
| 2022-09-13 10:00 PM | 13.6 | 13.3 | 11.8 | 12.9 |
| 2022-09-13 11:00 PM | 13.4 | 12.4 | 11.4 | 12.4 |
| 2022-09-14 12:00 AM | 12.7 | 12.2 | 10.6 | 11.8 |
| 2022-09-14 1:00 AM  | 11.9 | 11.7 | 9.5  | 11.0 |
| 2022-09-14 2:00 AM  | 11.5 | 11.3 | 8.9  | 10.6 |

|                     |      |      |      |      |
|---------------------|------|------|------|------|
| 2022-09-14 3:00 AM  | 11.2 | 11.0 | 8.6  | 10.3 |
| 2022-09-14 4:00 AM  | 11.0 | 11.0 | 8.5  | 10.2 |
| 2022-09-14 5:00 AM  | 10.5 | 10.2 | 7.7  | 9.5  |
| 2022-09-14 6:00 AM  | 10.1 | 9.6  | 7.0  | 8.9  |
| 2022-09-14 7:00 AM  | 9.6  | 9.3  | 6.5  | 8.5  |
| 2022-09-14 8:00 AM  | 9.3  | 8.9  | 6.2  | 8.1  |
| 2022-09-14 9:00 AM  | 9.6  | 9.3  | 6.8  | 8.6  |
| 2022-09-14 10:00 AM | 10.9 | 10.9 | 8.9  | 10.2 |
| 2022-09-14 11:00 AM | 12.8 | 12.7 | 12.2 | 12.6 |
| 2022-09-14 12:00 PM | 13.4 | 13.8 | 14.6 | 13.9 |
| 2022-09-14 1:00 PM  | 13.7 | 14.8 | 15.9 | 14.8 |
| 2022-09-14 2:00 PM  | 13.7 | 14.7 | 14.9 | 14.4 |
| 2022-09-14 3:00 PM  | 13.4 | 14.3 | 14.2 | 14.0 |
| 2022-09-14 4:00 PM  | 13.4 | 14.3 | 14.3 | 14.0 |
| 2022-09-14 5:00 PM  | 13.6 | 14.3 | 14.2 | 14.0 |
| 2022-09-14 6:00 PM  | 13.4 | 14.0 | 13.5 | 13.6 |
| 2022-09-14 7:00 PM  | 13.1 | 13.6 | 12.7 | 13.1 |
| 2022-09-14 8:00 PM  | 13.1 | 13.4 | 12.4 | 13.0 |
| 2022-09-14 9:00 PM  | 12.8 | 13.0 | 11.7 | 12.5 |
| 2022-09-14 10:00 PM | 12.1 | 12.3 | 10.5 | 11.6 |
| 2022-09-14 11:00 PM | 11.7 | 11.6 | 9.8  | 11.0 |
| 2022-09-15 12:00 AM | 11.4 | 11.0 | 9.3  | 10.6 |
| 2022-09-15 1:00 AM  | 11.2 | 11.2 | 9.2  | 10.5 |
| 2022-09-15 2:00 AM  | 11.7 | 11.9 | 10.4 | 11.3 |
| 2022-09-15 3:00 AM  | 12.0 | 12.2 | 11.1 | 11.8 |
| 2022-09-15 4:00 AM  | 12.2 | 12.4 | 11.3 | 12.0 |
| 2022-09-15 5:00 AM  | 12.4 | 12.6 | 11.6 | 12.2 |
| 2022-09-15 6:00 AM  | 12.5 | 12.7 | 11.8 | 12.3 |
| 2022-09-15 7:00 AM  | 12.5 | 12.8 | 11.7 | 12.3 |
| 2022-09-15 8:00 AM  | 12.6 | 12.8 | 11.9 | 12.4 |
| 2022-09-15 9:00 AM  | 12.8 | 13.1 | 12.5 | 12.8 |
| 2022-09-15 10:00 AM | 12.9 | 13.1 | 12.4 | 12.8 |
| 2022-09-15 11:00 AM | 13.0 | 13.2 | 12.5 | 12.9 |
| 2022-09-15 12:00 PM | 13.2 | 13.4 | 12.9 | 13.2 |
| 2022-09-15 1:00 PM  | 13.4 | 13.7 | 13.3 | 13.5 |
| 2022-09-15 2:00 PM  | 13.5 | 13.8 | 13.4 | 13.6 |
| 2022-09-15 3:00 PM  | 13.6 | 14.0 | 13.7 | 13.8 |
| 2022-09-15 4:00 PM  | 13.8 | 14.1 | 14.0 | 14.0 |
| 2022-09-15 5:00 PM  | 13.8 | 14.1 | 14.0 | 14.0 |
| 2022-09-15 6:00 PM  | 14.0 | 14.3 | 14.2 | 14.2 |
| 2022-09-15 7:00 PM  | 14.0 | 14.3 | 14.1 | 14.1 |
| 2022-09-15 8:00 PM  | 14.0 | 14.3 | 14.0 | 14.1 |
| 2022-09-15 9:00 PM  | 14.0 | 14.2 | 13.9 | 14.0 |

|                     |      |      |      |      |
|---------------------|------|------|------|------|
| 2022-09-15 10:00 PM | 14.0 | 14.2 | 13.9 | 14.0 |
| 2022-09-15 11:00 PM | 14.0 | 14.3 | 13.9 | 14.1 |
| 2022-09-16 12:00 AM | 14.0 | 14.1 | 13.6 | 13.9 |
| 2022-09-16 1:00 AM  | 14.0 | 14.1 | 13.6 | 13.9 |
| 2022-09-16 2:00 AM  | 14.0 | 14.1 | 13.6 | 13.9 |
| 2022-09-16 3:00 AM  | 13.9 | 13.9 | 13.2 | 13.7 |
| 2022-09-16 4:00 AM  | 13.8 | 13.6 | 12.8 | 13.4 |
| 2022-09-16 5:00 AM  | 13.6 | 13.2 | 12.5 | 13.1 |
| 2022-09-16 6:00 AM  | 13.6 | 13.2 | 12.4 | 13.1 |
| 2022-09-16 7:00 AM  | 13.5 | 13.1 | 12.2 | 12.9 |
| 2022-09-16 8:00 AM  | 13.3 | 12.7 | 11.8 | 12.6 |
| 2022-09-16 9:00 AM  | 13.2 | 12.7 | 11.8 | 12.6 |
| 2022-09-16 10:00 AM | 13.3 | 13.0 | 12.1 | 12.8 |
| 2022-09-16 11:00 AM | 13.4 | 13.1 | 12.3 | 12.9 |
| 2022-09-16 12:00 PM | 13.4 | 13.3 | 12.5 | 13.1 |
| 2022-09-16 1:00 PM  | 13.5 | 13.5 | 12.7 | 13.2 |
| 2022-09-16 2:00 PM  | 13.6 | 13.5 | 12.9 | 13.3 |
| 2022-09-16 3:00 PM  | 13.6 | 13.5 | 12.8 | 13.3 |
| 2022-09-16 4:00 PM  | 13.6 | 13.5 | 12.8 | 13.3 |
| 2022-09-16 5:00 PM  | 13.6 | 13.5 | 12.8 | 13.3 |
| 2022-09-16 6:00 PM  | 13.6 | 13.5 | 12.9 | 13.3 |
| 2022-09-16 7:00 PM  | 13.5 | 13.5 | 12.9 | 13.3 |
| 2022-09-16 8:00 PM  | 13.5 | 13.5 | 12.9 | 13.3 |
| 2022-09-16 9:00 PM  | 13.5 | 13.6 | 13.0 | 13.4 |
| 2022-09-16 10:00 PM | 13.6 | 13.8 | 13.3 | 13.6 |
| 2022-09-16 11:00 PM | 13.7 | 13.9 | 13.5 | 13.7 |
| 2022-09-17 12:00 AM | 13.8 | 14.0 | 13.6 | 13.8 |
| 2022-09-17 1:00 AM  | 13.9 | 14.2 | 13.7 | 13.9 |
| 2022-09-17 2:00 AM  | 14.0 | 14.2 | 13.8 | 14.0 |
| 2022-09-17 3:00 AM  | 14.0 | 14.2 | 13.8 | 14.0 |
| 2022-09-17 4:00 AM  | 14.0 | 14.2 | 13.9 | 14.0 |
| 2022-09-17 5:00 AM  | 14.0 | 14.3 | 13.9 | 14.1 |
| 2022-09-17 6:00 AM  | 14.1 | 14.3 | 13.9 | 14.1 |
| 2022-09-17 7:00 AM  | 14.1 | 14.3 | 13.9 | 14.1 |
| 2022-09-17 8:00 AM  | 14.1 | 14.3 | 13.9 | 14.1 |
| 2022-09-17 9:00 AM  | 14.3 | 14.4 | 14.2 | 14.3 |
| 2022-09-17 10:00 AM | 14.5 | 14.7 | 14.6 | 14.6 |
| 2022-09-17 11:00 AM | 14.7 | 14.9 | 14.9 | 14.8 |
| 2022-09-17 12:00 PM | 14.9 | 15.2 | 15.3 | 15.1 |
| 2022-09-17 1:00 PM  | 15.2 | 15.5 | 15.8 | 15.5 |
| 2022-09-17 2:00 PM  | 15.5 | 15.8 | 16.2 | 15.8 |
| 2022-09-17 3:00 PM  | 15.6 | 15.9 | 16.2 | 15.9 |
| 2022-09-17 4:00 PM  | 15.6 | 15.8 | 16.0 | 15.8 |

|                     |      |      |      |      |
|---------------------|------|------|------|------|
| 2022-09-17 5:00 PM  | 15.5 | 15.7 | 15.8 | 15.7 |
| 2022-09-17 6:00 PM  | 15.5 | 15.7 | 15.8 | 15.7 |
| 2022-09-17 7:00 PM  | 15.4 | 15.6 | 15.7 | 15.6 |
| 2022-09-17 8:00 PM  | 15.4 | 15.6 | 15.5 | 15.5 |
| 2022-09-17 9:00 PM  | 15.3 | 15.5 | 15.4 | 15.4 |
| 2022-09-17 10:00 PM | 15.3 | 15.5 | 15.3 | 15.4 |
| 2022-09-17 11:00 PM | 15.3 | 15.5 | 15.3 | 15.4 |
| 2022-09-18 12:00 AM | 15.3 | 15.5 | 15.3 | 15.4 |
| 2022-09-18 1:00 AM  | 15.3 | 15.5 | 15.4 | 15.4 |
| 2022-09-18 2:00 AM  | 15.3 | 15.5 | 15.4 | 15.4 |
| 2022-09-18 3:00 AM  | 15.3 | 15.5 | 15.3 | 15.4 |
| 2022-09-18 4:00 AM  | 15.3 | 15.5 | 15.3 | 15.4 |
| 2022-09-18 5:00 AM  | 15.3 | 15.5 | 15.2 | 15.3 |
| 2022-09-18 6:00 AM  | 15.3 | 15.5 | 15.2 | 15.3 |
| 2022-09-18 7:00 AM  | 15.3 | 15.6 | 15.2 | 15.4 |
| 2022-09-18 8:00 AM  | 15.3 | 15.5 | 15.1 | 15.3 |
| 2022-09-18 9:00 AM  | 15.3 | 15.4 | 15.0 | 15.2 |
| 2022-09-18 10:00 AM | 15.4 | 15.5 | 15.2 | 15.4 |
| 2022-09-18 11:00 AM | 15.6 | 15.8 | 15.6 | 15.7 |
| 2022-09-18 12:00 PM | 15.8 | 16.0 | 15.8 | 15.9 |
| 2022-09-18 1:00 PM  | 16.2 | 16.5 | 16.5 | 16.4 |
| 2022-09-18 2:00 PM  | 16.7 | 17.0 | 17.5 | 17.1 |
| 2022-09-18 3:00 PM  | 16.7 | 17.1 | 17.6 | 17.1 |
| 2022-09-18 4:00 PM  | 16.8 | 17.2 | 18.0 | 17.3 |
| 2022-09-18 5:00 PM  | 16.8 | 17.2 | 17.6 | 17.2 |
| 2022-09-18 6:00 PM  | 16.9 | 17.4 | 17.9 | 17.4 |
| 2022-09-18 7:00 PM  | 16.9 | 17.2 | 17.7 | 17.3 |
| 2022-09-18 8:00 PM  | 16.6 | 16.8 | 16.9 | 16.8 |
| 2022-09-18 9:00 PM  | 16.3 | 16.4 | 16.2 | 16.3 |
| 2022-09-18 10:00 PM | 16.0 | 16.1 | 15.6 | 15.9 |
| 2022-09-18 11:00 PM | 15.5 | 15.6 | 14.6 | 15.2 |
| 2022-09-19 12:00 AM | 15.1 | 15.0 | 13.8 | 14.6 |
| 2022-09-19 1:00 AM  | 14.8 | 14.5 | 13.2 | 14.2 |
| 2022-09-19 2:00 AM  | 14.6 | 14.3 | 12.9 | 13.9 |
| 2022-09-19 3:00 AM  | 14.3 | 13.9 | 12.5 | 13.6 |
| 2022-09-19 4:00 AM  | 14.1 | 13.6 | 12.1 | 13.3 |
| 2022-09-19 5:00 AM  | 14.2 | 14.0 | 12.5 | 13.6 |
| 2022-09-19 6:00 AM  | 14.0 | 13.6 | 12.1 | 13.2 |
| 2022-09-19 7:00 AM  | 13.8 | 13.5 | 12.0 | 13.1 |
| 2022-09-19 8:00 AM  | 13.7 | 13.5 | 11.8 | 13.0 |
| 2022-09-19 9:00 AM  | 13.8 | 13.6 | 12.1 | 13.2 |
| 2022-09-19 10:00 AM | 14.6 | 14.7 | 13.9 | 14.4 |
| 2022-09-19 11:00 AM | 15.7 | 15.7 | 15.7 | 15.7 |

|                     |      |      |      |      |
|---------------------|------|------|------|------|
| 2022-09-19 12:00 PM | 16.0 | 16.4 | 17.1 | 16.5 |
| 2022-09-19 1:00 PM  | 16.1 | 17.2 | 18.3 | 17.2 |
| 2022-09-19 2:00 PM  | 16.2 | 17.2 | 18.1 | 17.2 |
| 2022-09-19 3:00 PM  | 16.3 | 17.3 | 18.6 | 17.4 |
| 2022-09-19 4:00 PM  | 16.6 | 18.0 | 18.7 | 17.8 |
| 2022-09-19 5:00 PM  | 16.8 | 18.1 | 18.7 | 17.9 |
| 2022-09-19 6:00 PM  | 16.7 | 17.9 | 18.1 | 17.6 |
| 2022-09-19 7:00 PM  | 16.4 | 17.3 | 17.1 | 16.9 |
| 2022-09-19 8:00 PM  | 16.2 | 16.6 | 16.2 | 16.3 |
| 2022-09-19 9:00 PM  | 15.7 | 15.9 | 15.2 | 15.6 |
| 2022-09-19 10:00 PM | 15.4 | 15.6 | 14.6 | 15.2 |
| 2022-09-19 11:00 PM | 15.3 | 15.4 | 14.4 | 15.0 |
| 2022-09-20 12:00 AM | 15.4 | 15.5 | 14.7 | 15.2 |
| 2022-09-20 1:00 AM  | 15.5 | 15.5 | 14.8 | 15.3 |
| 2022-09-20 2:00 AM  | 15.5 | 15.5 | 14.7 | 15.2 |
| 2022-09-20 3:00 AM  | 15.3 | 15.4 | 14.5 | 15.1 |
| 2022-09-20 4:00 AM  | 15.4 | 15.6 | 14.7 | 15.2 |
| 2022-09-20 5:00 AM  | 15.4 | 15.5 | 14.7 | 15.2 |
| 2022-09-20 6:00 AM  | 15.2 | 15.4 | 14.5 | 15.0 |
| 2022-09-20 7:00 AM  | 15.3 | 15.6 | 14.8 | 15.2 |
| 2022-09-20 8:00 AM  | 15.4 | 15.6 | 14.9 | 15.3 |
| 2022-09-20 9:00 AM  | 15.5 | 15.7 | 15.1 | 15.4 |
| 2022-09-20 10:00 AM | 15.8 | 16.0 | 15.5 | 15.8 |
| 2022-09-20 11:00 AM | 16.2 | 16.4 | 16.3 | 16.3 |
| 2022-09-20 12:00 PM | 16.6 | 17.0 | 17.8 | 17.1 |
| 2022-09-20 1:00 PM  | 16.8 | 18.0 | 19.8 | 18.2 |
| 2022-09-20 2:00 PM  | 16.8 | 18.0 | 18.7 | 17.8 |
| 2022-09-20 3:00 PM  | 16.9 | 18.0 | 18.6 | 17.8 |
| 2022-09-20 4:00 PM  | 17.4 | 18.6 | 19.4 | 18.5 |
| 2022-09-20 5:00 PM  | 17.4 | 18.3 | 18.7 | 18.1 |
| 2022-09-20 6:00 PM  | 17.2 | 18.0 | 17.9 | 17.7 |
| 2022-09-20 7:00 PM  | 17.1 | 17.8 | 17.8 | 17.6 |
| 2022-09-20 8:00 PM  | 17.0 | 17.6 | 17.5 | 17.4 |
| 2022-09-20 9:00 PM  | 16.8 | 17.3 | 17.0 | 17.0 |
| 2022-09-20 10:00 PM | 16.4 | 16.8 | 16.2 | 16.5 |
| 2022-09-20 11:00 PM | 16.4 | 16.8 | 16.2 | 16.5 |
| 2022-09-21 12:00 AM | 16.4 | 16.8 | 16.3 | 16.5 |
| 2022-09-21 1:00 AM  | 16.4 | 16.7 | 16.3 | 16.5 |
| 2022-09-21 2:00 AM  | 16.2 | 16.5 | 16.0 | 16.2 |
| 2022-09-21 3:00 AM  | 16.0 | 16.2 | 15.5 | 15.9 |
| 2022-09-21 4:00 AM  | 15.9 | 16.0 | 15.3 | 15.7 |
| 2022-09-21 5:00 AM  | 15.7 | 15.8 | 15.0 | 15.5 |
| 2022-09-21 6:00 AM  | 15.4 | 15.5 | 14.5 | 15.1 |

|                     |      |      |      |      |
|---------------------|------|------|------|------|
| 2022-09-21 7:00 AM  | 14.9 | 14.6 | 13.5 | 14.3 |
| 2022-09-21 8:00 AM  | 14.5 | 14.2 | 12.8 | 13.8 |
| 2022-09-21 9:00 AM  | 14.5 | 14.3 | 12.9 | 13.9 |
| 2022-09-21 10:00 AM | 15.0 | 15.0 | 14.1 | 14.7 |
| 2022-09-21 11:00 AM | 15.5 | 15.2 | 14.8 | 15.2 |
| 2022-09-21 12:00 PM | 15.5 | 15.1 | 15.2 | 15.3 |
| 2022-09-21 1:00 PM  | 15.3 | 15.0 | 15.0 | 15.1 |
| 2022-09-21 2:00 PM  | 15.4 | 15.3 | 15.1 | 15.3 |
| 2022-09-21 3:00 PM  | 15.3 | 14.3 | 13.9 | 14.5 |
| 2022-09-21 4:00 PM  | 15.0 | 13.9 | 13.4 | 14.1 |
| 2022-09-21 5:00 PM  | 14.9 | 13.9 | 13.5 | 14.1 |
| 2022-09-21 6:00 PM  | 14.5 | 13.2 | 12.7 | 13.5 |
| 2022-09-21 7:00 PM  | 13.9 | 12.4 | 11.8 | 12.7 |
| 2022-09-21 8:00 PM  | 13.6 | 12.0 | 11.3 | 12.3 |
| 2022-09-21 9:00 PM  | 13.2 | 11.6 | 10.9 | 11.9 |
| 2022-09-21 10:00 PM | 12.8 | 11.9 | 10.8 | 11.8 |
| 2022-09-21 11:00 PM | 12.6 | 11.9 | 10.6 | 11.7 |
| 2022-09-22 12:00 AM | 12.4 | 11.7 | 10.4 | 11.5 |
| 2022-09-22 1:00 AM  | 12.1 | 11.0 | 9.7  | 10.9 |
| 2022-09-22 2:00 AM  | 12.0 | 10.5 | 9.4  | 10.6 |
| 2022-09-22 3:00 AM  | 11.7 | 10.5 | 9.2  | 10.5 |
| 2022-09-22 4:00 AM  | 11.1 | 10.2 | 8.5  | 9.9  |
| 2022-09-22 5:00 AM  | 11.2 | 9.8  | 8.6  | 9.9  |
| 2022-09-22 6:00 AM  | 11.2 | 10.2 | 8.8  | 10.1 |
| 2022-09-22 7:00 AM  | 11.3 | 10.1 | 8.9  | 10.1 |
| 2022-09-22 8:00 AM  | 11.0 | 8.9  | 8.1  | 9.3  |
| 2022-09-22 9:00 AM  | 10.6 | 9.2  | 7.9  | 9.2  |
| 2022-09-22 10:00 AM | 10.8 | 8.4  | 7.9  | 9.0  |
| 2022-09-22 11:00 AM | 11.8 | 9.3  | 9.1  | 10.1 |
| 2022-09-22 12:00 PM | 12.1 | 10.6 | 10.9 | 11.2 |
| 2022-09-22 1:00 PM  | 12.2 | 11.6 | 12.1 | 12.0 |
| 2022-09-22 2:00 PM  | 12.1 | 11.6 | 11.1 | 11.6 |
| 2022-09-22 3:00 PM  | 11.9 | 11.7 | 11.0 | 11.5 |
| 2022-09-22 4:00 PM  | 12.0 | 12.6 | 12.1 | 12.2 |
| 2022-09-22 5:00 PM  | 12.4 | 13.0 | 12.6 | 12.7 |
| 2022-09-22 6:00 PM  | 12.3 | 12.7 | 11.7 | 12.2 |
| 2022-09-22 7:00 PM  | 12.1 | 12.6 | 11.4 | 12.0 |
| 2022-09-22 8:00 PM  | 11.8 | 12.0 | 10.5 | 11.4 |
| 2022-09-22 9:00 PM  | 11.3 | 11.1 | 9.5  | 10.6 |
| 2022-09-22 10:00 PM | 10.7 | 10.3 | 8.6  | 9.9  |
| 2022-09-22 11:00 PM | 10.3 | 9.7  | 8.0  | 9.3  |
| 2022-09-23 12:00 AM | 9.8  | 9.1  | 7.3  | 8.7  |
| 2022-09-23 1:00 AM  | 9.4  | 8.4  | 6.7  | 8.2  |

|                     |      |      |      |      |
|---------------------|------|------|------|------|
| 2022-09-23 2:00 AM  | 9.1  | 8.4  | 6.3  | 7.9  |
| 2022-09-23 3:00 AM  | 8.9  | 8.0  | 6.1  | 7.7  |
| 2022-09-23 4:00 AM  | 8.7  | 7.7  | 5.8  | 7.4  |
| 2022-09-23 5:00 AM  | 8.6  | 7.5  | 5.7  | 7.3  |
| 2022-09-23 6:00 AM  | 8.5  | 7.1  | 5.5  | 7.0  |
| 2022-09-23 7:00 AM  | 8.1  | 6.9  | 5.1  | 6.7  |
| 2022-09-23 8:00 AM  | 7.9  | 6.0  | 4.5  | 6.1  |
| 2022-09-23 9:00 AM  | 7.9  | 7.0  | 4.9  | 6.6  |
| 2022-09-23 10:00 AM | 9.4  | 8.9  | 7.4  | 8.6  |
| 2022-09-23 11:00 AM | 11.3 | 11.1 | 10.7 | 11.0 |
| 2022-09-23 12:00 PM | 11.8 | 12.2 | 13.3 | 12.4 |
| 2022-09-23 1:00 PM  | 12.3 | 13.1 | 14.2 | 13.2 |
| 2022-09-23 2:00 PM  | 12.7 | 13.5 | 14.1 | 13.4 |

**Table S5:** Hourly air temperature under 50% shade from May 10 to September 23, 2023.

|                     | Port 1                      | Port 2                      | Port 3                      | Average                     |
|---------------------|-----------------------------|-----------------------------|-----------------------------|-----------------------------|
|                     | 5TE<br>Moisture/<br>Temp/EC | 5TE<br>Moisture/<br>Temp/EC | 5TE<br>Moisture/<br>Temp/EC | 5TE<br>Moisture/<br>Temp/EC |
| Measurement Time    | °C Temp                     | °C Temp                     | °C Temp                     | °C Temp                     |
| 2022-05-11 1:53 PM  | 16.6                        | 26.1                        | 21.3                        | 21.3                        |
| 2022-05-11 2:00 PM  | 19.4                        | 26.0                        | 21.7                        | 22.4                        |
| 2022-05-11 3:00 PM  | 21.2                        | 24.7                        | 25.9                        | 23.9                        |
| 2022-05-11 4:00 PM  | 20.6                        | 22.1                        | 26.0                        | 22.9                        |
| 2022-05-11 5:00 PM  | 19.8                        | 20.9                        | 22.4                        | 21.0                        |
| 2022-05-11 6:00 PM  | 17.7                        | 18.5                        | 17.9                        | 18.0                        |
| 2022-05-11 7:00 PM  | 16.5                        | 17.0                        | 16.3                        | 16.6                        |
| 2022-05-11 8:00 PM  | 16.4                        | 16.7                        | 15.6                        | 16.2                        |
| 2022-05-11 9:00 PM  | 15.7                        | 15.9                        | 14.9                        | 15.5                        |
| 2022-05-11 10:00 PM | 13.3                        | 13.4                        | 13.1                        | 13.3                        |
| 2022-05-11 11:00 PM | 12.5                        | 12.4                        | 12.3                        | 12.4                        |
| 2022-05-12 12:00 AM | 11.9                        | 11.8                        | 11.8                        | 11.8                        |
| 2022-05-12 1:00 AM  | 11.4                        | 11.2                        | 11.3                        | 11.3                        |
| 2022-05-12 2:00 AM  | 12.2                        | 12.2                        | 11.9                        | 12.1                        |
| 2022-05-12 3:00 AM  | 12.9                        | 13.1                        | 12.5                        | 12.8                        |
| 2022-05-12 4:00 AM  | 9.9                         | 9.8                         | 10.0                        | 9.9                         |
| 2022-05-12 5:00 AM  | 10.2                        | 10.1                        | 10.2                        | 10.2                        |
| 2022-05-12 6:00 AM  | 10.8                        | 10.7                        | 10.7                        | 10.7                        |
| 2022-05-12 7:00 AM  | 10.6                        | 10.6                        | 10.6                        | 10.6                        |
| 2022-05-12 8:00 AM  | 10.3                        | 10.1                        | 10.2                        | 10.2                        |
| 2022-05-12 9:00 AM  | 10.6                        | 10.6                        | 10.6                        | 10.6                        |



|                     |      |      |      |      |
|---------------------|------|------|------|------|
| 2022-05-12 10:00 AM | 10.8 | 10.8 | 10.8 | 10.8 |
| 2022-05-12 11:00 AM | 11.3 | 11.3 | 11.2 | 11.3 |
| 2022-05-12 12:00 PM | 13.1 | 13.1 | 12.5 | 12.9 |
| 2022-05-12 1:00 PM  | 15.4 | 16.2 | 14.4 | 15.3 |
| 2022-05-12 2:00 PM  | 17.5 | 19.1 | 17.1 | 17.9 |
| 2022-05-12 3:00 PM  | 17.6 | 18.7 | 18.3 | 18.2 |
| 2022-05-12 4:00 PM  | 16.0 | 16.2 | 15.8 | 16.0 |
| 2022-05-12 5:00 PM  | 15.4 | 15.5 | 14.9 | 15.3 |
| 2022-05-12 6:00 PM  | 15.2 | 15.2 | 14.8 | 15.1 |
| 2022-05-12 7:00 PM  | 14.6 | 14.4 | 14.2 | 14.4 |
| 2022-05-12 8:00 PM  | 13.9 | 13.8 | 13.6 | 13.8 |
| 2022-05-12 9:00 PM  | 12.3 | 12.1 | 12.1 | 12.2 |
| 2022-05-12 10:00 PM | 11.4 | 11.0 | 11.3 | 11.2 |
| 2022-05-12 11:00 PM | 11.5 | 11.2 | 11.4 | 11.4 |
| 2022-05-13 12:00 AM | 11.4 | 11.2 | 11.3 | 11.3 |
| 2022-05-13 1:00 AM  | 10.9 | 10.8 | 10.9 | 10.9 |
| 2022-05-13 2:00 AM  | 10.5 | 10.3 | 10.5 | 10.4 |
| 2022-05-13 3:00 AM  | 11.3 | 11.2 | 11.3 | 11.3 |
| 2022-05-13 4:00 AM  | 10.4 | 10.3 | 10.5 | 10.4 |
| 2022-05-13 5:00 AM  | 10.3 | 10.2 | 10.3 | 10.3 |
| 2022-05-13 6:00 AM  | 10.3 | 10.2 | 10.4 | 10.3 |
| 2022-05-13 7:00 AM  | 9.6  | 9.6  | 9.8  | 9.7  |
| 2022-05-13 8:00 AM  | 9.8  | 9.7  | 9.9  | 9.8  |
| 2022-05-13 9:00 AM  | 10.2 | 10.1 | 10.2 | 10.2 |
| 2022-05-13 10:00 AM | 10.8 | 10.9 | 10.8 | 10.8 |
| 2022-05-13 11:00 AM | 13.2 | 13.9 | 12.0 | 13.0 |
| 2022-05-13 12:00 PM | 18.5 | 22.7 | 13.3 | 18.2 |
| 2022-05-13 1:00 PM  | 19.2 | 23.9 | 15.0 | 19.4 |
| 2022-05-13 2:00 PM  | 18.8 | 22.9 | 17.9 | 19.9 |
| 2022-05-13 3:00 PM  | 17.4 | 20.6 | 23.0 | 20.3 |
| 2022-05-13 4:00 PM  | 17.3 | 18.2 | 24.2 | 19.9 |
| 2022-05-13 5:00 PM  | 17.6 | 17.8 | 26.8 | 20.7 |
| 2022-05-13 6:00 PM  | 16.6 | 16.6 | 23.3 | 18.8 |
| 2022-05-13 7:00 PM  | 15.0 | 14.9 | 16.4 | 15.4 |
| 2022-05-13 8:00 PM  | 14.1 | 13.8 | 14.7 | 14.2 |
| 2022-05-13 9:00 PM  | 13.3 | 12.9 | 13.7 | 13.3 |
| 2022-05-13 10:00 PM | 11.5 | 11.0 | 11.9 | 11.5 |
| 2022-05-13 11:00 PM | 10.0 | 9.4  | 10.4 | 9.9  |
| 2022-05-14 12:00 AM | 9.3  | 8.7  | 9.8  | 9.3  |
| 2022-05-14 1:00 AM  | 9.6  | 9.0  | 10.0 | 9.5  |
| 2022-05-14 2:00 AM  | 9.4  | 8.8  | 9.7  | 9.3  |
| 2022-05-14 3:00 AM  | 9.3  | 8.8  | 9.6  | 9.2  |
| 2022-05-14 4:00 AM  | 9.2  | 8.7  | 9.4  | 9.1  |
| 2022-05-14 5:00 AM  | 8.8  | 8.3  | 9.1  | 8.7  |
| 2022-05-14 6:00 AM  | 8.3  | 7.8  | 8.6  | 8.2  |

|                     |      |      |      |      |
|---------------------|------|------|------|------|
| 2022-05-14 7:00 AM  | 7.5  | 6.9  | 7.9  | 7.4  |
| 2022-05-14 8:00 AM  | 8.5  | 8.0  | 8.6  | 8.4  |
| 2022-05-14 9:00 AM  | 9.8  | 9.5  | 9.2  | 9.5  |
| 2022-05-14 10:00 AM | 12.3 | 12.6 | 10.6 | 11.8 |
| 2022-05-14 11:00 AM | 20.2 | 26.3 | 13.0 | 19.8 |
| 2022-05-14 12:00 PM | 20.8 | 26.8 | 13.2 | 20.3 |
| 2022-05-14 1:00 PM  | 20.0 | 26.0 | 14.4 | 20.1 |
| 2022-05-14 2:00 PM  | 19.4 | 24.1 | 17.9 | 20.5 |
| 2022-05-14 3:00 PM  | 17.1 | 20.5 | 23.2 | 20.3 |
| 2022-05-14 4:00 PM  | 18.0 | 18.9 | 27.2 | 21.4 |
| 2022-05-14 5:00 PM  | 18.4 | 18.9 | 28.0 | 21.8 |
| 2022-05-14 6:00 PM  | 18.7 | 19.4 | 22.3 | 20.1 |
| 2022-05-14 7:00 PM  | 18.2 | 18.6 | 20.0 | 18.9 |
| 2022-05-14 8:00 PM  | 17.3 | 17.7 | 18.8 | 17.9 |
| 2022-05-14 9:00 PM  | 16.0 | 16.3 | 16.9 | 16.4 |
| 2022-05-14 10:00 PM | 14.4 | 14.3 | 14.8 | 14.5 |
| 2022-05-14 11:00 PM | 14.9 | 14.8 | 14.8 | 14.8 |
| 2022-05-15 12:00 AM | 13.7 | 13.6 | 13.7 | 13.7 |
| 2022-05-15 1:00 AM  | 12.3 | 12.0 | 12.5 | 12.3 |
| 2022-05-15 2:00 AM  | 11.3 | 10.8 | 11.5 | 11.2 |
| 2022-05-15 3:00 AM  | 10.3 | 9.5  | 10.5 | 10.1 |
| 2022-05-15 4:00 AM  | 9.2  | 8.4  | 9.4  | 9.0  |
| 2022-05-15 5:00 AM  | 8.8  | 8.2  | 9.2  | 8.7  |
| 2022-05-15 6:00 AM  | 8.5  | 7.8  | 8.7  | 8.3  |
| 2022-05-15 7:00 AM  | 7.8  | 7.0  | 8.2  | 7.7  |
| 2022-05-15 8:00 AM  | 7.8  | 7.2  | 8.3  | 7.8  |
| 2022-05-15 9:00 AM  | 9.8  | 9.4  | 9.7  | 9.6  |
| 2022-05-15 10:00 AM | 13.2 | 13.3 | 12.1 | 12.9 |
| 2022-05-15 11:00 AM | 16.0 | 17.7 | 13.6 | 15.8 |
| 2022-05-15 12:00 PM | 16.6 | 18.2 | 14.5 | 16.4 |
| 2022-05-15 1:00 PM  | 18.0 | 20.2 | 16.1 | 18.1 |
| 2022-05-15 2:00 PM  | 19.1 | 21.8 | 18.7 | 19.9 |
| 2022-05-15 3:00 PM  | 17.5 | 18.7 | 18.4 | 18.2 |
| 2022-05-15 4:00 PM  | 17.0 | 17.6 | 19.2 | 17.9 |
| 2022-05-15 5:00 PM  | 17.4 | 18.1 | 19.9 | 18.5 |
| 2022-05-15 6:00 PM  | 17.0 | 17.7 | 17.4 | 17.4 |
| 2022-05-15 7:00 PM  | 16.0 | 16.6 | 16.2 | 16.3 |
| 2022-05-15 8:00 PM  | 15.2 | 15.6 | 15.2 | 15.3 |
| 2022-05-15 9:00 PM  | 14.6 | 14.7 | 14.4 | 14.6 |
| 2022-05-15 10:00 PM | 13.9 | 14.0 | 13.9 | 13.9 |
| 2022-05-15 11:00 PM | 12.5 | 12.3 | 12.5 | 12.4 |
| 2022-05-16 12:00 AM | 11.7 | 11.5 | 11.9 | 11.7 |
| 2022-05-16 1:00 AM  | 11.8 | 11.7 | 11.5 | 11.7 |
| 2022-05-16 2:00 AM  | 10.8 | 10.6 | 10.6 | 10.7 |
| 2022-05-16 3:00 AM  | 9.6  | 9.3  | 9.5  | 9.5  |

|                     |      |      |      |      |
|---------------------|------|------|------|------|
| 2022-05-16 4:00 AM  | 8.8  | 8.4  | 8.9  | 8.7  |
| 2022-05-16 5:00 AM  | 8.5  | 7.8  | 8.6  | 8.3  |
| 2022-05-16 6:00 AM  | 8.2  | 7.3  | 8.2  | 7.9  |
| 2022-05-16 7:00 AM  | 8.2  | 7.4  | 8.2  | 7.9  |
| 2022-05-16 8:00 AM  | 8.5  | 8.0  | 8.5  | 8.3  |
| 2022-05-16 9:00 AM  | 9.3  | 9.2  | 8.8  | 9.1  |
| 2022-05-16 10:00 AM | 10.1 | 10.3 | 9.2  | 9.9  |
| 2022-05-16 11:00 AM | 10.9 | 11.8 | 9.1  | 10.6 |
| 2022-05-16 12:00 PM | 12.5 | 13.8 | 9.7  | 12.0 |
| 2022-05-16 1:00 PM  | 13.2 | 14.8 | 11.4 | 13.1 |
| 2022-05-16 2:00 PM  | 14.5 | 16.6 | 13.8 | 15.0 |
| 2022-05-16 3:00 PM  | 14.3 | 15.2 | 14.8 | 14.8 |
| 2022-05-16 4:00 PM  | 14.6 | 15.0 | 18.5 | 16.0 |
| 2022-05-16 5:00 PM  | 14.1 | 14.4 | 16.6 | 15.0 |
| 2022-05-16 6:00 PM  | 13.7 | 13.9 | 14.2 | 13.9 |
| 2022-05-16 7:00 PM  | 12.6 | 12.6 | 12.7 | 12.6 |
| 2022-05-16 8:00 PM  | 11.8 | 11.7 | 11.7 | 11.7 |
| 2022-05-16 9:00 PM  | 11.0 | 10.8 | 10.8 | 10.9 |
| 2022-05-16 10:00 PM | 9.5  | 9.2  | 9.4  | 9.4  |
| 2022-05-16 11:00 PM | 9.4  | 9.1  | 9.3  | 9.3  |
| 2022-05-17 12:00 AM | 8.5  | 8.0  | 8.4  | 8.3  |
| 2022-05-17 1:00 AM  | 7.4  | 6.7  | 7.6  | 7.2  |
| 2022-05-17 2:00 AM  | 7.0  | 6.4  | 7.3  | 6.9  |
| 2022-05-17 3:00 AM  | 5.9  | 5.2  | 6.4  | 5.8  |
| 2022-05-17 4:00 AM  | 5.9  | 5.2  | 6.2  | 5.8  |
| 2022-05-17 5:00 AM  | 5.2  | 4.3  | 5.6  | 5.0  |
| 2022-05-17 6:00 AM  | 4.1  | 3.2  | 4.8  | 4.0  |
| 2022-05-17 7:00 AM  | 3.4  | 2.4  | 4.1  | 3.3  |
| 2022-05-17 8:00 AM  | 3.8  | 3.1  | 4.4  | 3.8  |
| 2022-05-17 9:00 AM  | 5.7  | 5.2  | 5.6  | 5.5  |
| 2022-05-17 10:00 AM | 8.2  | 7.8  | 6.7  | 7.6  |
| 2022-05-17 11:00 AM | 14.8 | 19.7 | 8.5  | 14.3 |
| 2022-05-17 12:00 PM | 19.2 | 25.0 | 10.7 | 18.3 |
| 2022-05-17 1:00 PM  | 18.0 | 23.8 | 12.8 | 18.2 |
| 2022-05-17 2:00 PM  | 17.3 | 22.0 | 17.4 | 18.9 |
| 2022-05-17 3:00 PM  | 15.2 | 19.4 | 23.4 | 19.3 |
| 2022-05-17 4:00 PM  | 15.2 | 16.5 | 25.9 | 19.2 |
| 2022-05-17 5:00 PM  | 14.8 | 15.2 | 26.9 | 19.0 |
| 2022-05-17 6:00 PM  | 13.8 | 13.9 | 20.3 | 16.0 |
| 2022-05-17 7:00 PM  | 12.2 | 12.1 | 13.4 | 12.6 |
| 2022-05-17 8:00 PM  | 11.6 | 11.4 | 12.1 | 11.7 |
| 2022-05-17 9:00 PM  | 10.4 | 10.0 | 10.8 | 10.4 |
| 2022-05-17 10:00 PM | 8.5  | 7.8  | 8.9  | 8.4  |
| 2022-05-17 11:00 PM | 7.4  | 6.6  | 7.9  | 7.3  |
| 2022-05-18 12:00 AM | 6.4  | 5.6  | 7.0  | 6.3  |

|                     |      |      |      |      |
|---------------------|------|------|------|------|
| 2022-05-18 1:00 AM  | 5.7  | 4.9  | 6.4  | 5.7  |
| 2022-05-18 2:00 AM  | 5.6  | 4.8  | 6.4  | 5.6  |
| 2022-05-18 3:00 AM  | 6.0  | 5.3  | 6.7  | 6.0  |
| 2022-05-18 4:00 AM  | 6.6  | 6.1  | 7.0  | 6.6  |
| 2022-05-18 5:00 AM  | 6.4  | 5.8  | 6.9  | 6.4  |
| 2022-05-18 6:00 AM  | 6.3  | 5.6  | 6.7  | 6.2  |
| 2022-05-18 7:00 AM  | 6.6  | 6.1  | 6.9  | 6.5  |
| 2022-05-18 8:00 AM  | 7.0  | 6.6  | 7.1  | 6.9  |
| 2022-05-18 9:00 AM  | 7.1  | 6.9  | 7.4  | 7.1  |
| 2022-05-18 10:00 AM | 8.2  | 8.6  | 8.2  | 8.3  |
| 2022-05-18 11:00 AM | 9.4  | 9.7  | 8.8  | 9.3  |
| 2022-05-18 12:00 PM | 9.5  | 9.9  | 9.3  | 9.6  |
| 2022-05-18 1:00 PM  | 8.4  | 8.4  | 8.3  | 8.4  |
| 2022-05-18 2:00 PM  | 10.3 | 10.7 | 9.4  | 10.1 |
| 2022-05-18 3:00 PM  | 9.4  | 9.5  | 9.0  | 9.3  |
| 2022-05-18 4:00 PM  | 7.7  | 7.7  | 8.0  | 7.8  |
| 2022-05-18 5:00 PM  | 7.5  | 7.4  | 7.8  | 7.6  |
| 2022-05-18 6:00 PM  | 6.6  | 6.4  | 6.9  | 6.6  |
| 2022-05-18 7:00 PM  | 6.7  | 6.7  | 7.4  | 6.9  |
| 2022-05-18 8:00 PM  | 6.5  | 6.0  | 6.7  | 6.4  |
| 2022-05-18 9:00 PM  | 5.9  | 5.5  | 6.4  | 5.9  |
| 2022-05-18 10:00 PM | 5.9  | 5.5  | 6.3  | 5.9  |
| 2022-05-18 11:00 PM | 5.7  | 5.4  | 6.1  | 5.7  |
| 2022-05-19 12:00 AM | 5.5  | 5.2  | 5.9  | 5.5  |
| 2022-05-19 1:00 AM  | 5.8  | 5.3  | 5.9  | 5.7  |
| 2022-05-19 2:00 AM  | 6.0  | 5.5  | 5.9  | 5.8  |
| 2022-05-19 3:00 AM  | 6.0  | 5.5  | 5.8  | 5.8  |
| 2022-05-19 4:00 AM  | 5.9  | 5.5  | 5.9  | 5.8  |
| 2022-05-19 5:00 AM  | 6.1  | 5.6  | 5.8  | 5.8  |
| 2022-05-19 6:00 AM  | 6.1  | 5.7  | 5.8  | 5.9  |
| 2022-05-19 7:00 AM  | 6.3  | 5.9  | 6.2  | 6.1  |
| 2022-05-19 8:00 AM  | 6.7  | 6.5  | 6.6  | 6.6  |
| 2022-05-19 9:00 AM  | 7.3  | 7.3  | 7.1  | 7.2  |
| 2022-05-19 10:00 AM | 8.3  | 8.6  | 8.1  | 8.3  |
| 2022-05-19 11:00 AM | 10.6 | 11.5 | 9.9  | 10.7 |
| 2022-05-19 12:00 PM | 12.1 | 13.1 | 11.5 | 12.2 |
| 2022-05-19 1:00 PM  | 13.6 | 15.0 | 13.0 | 13.9 |
| 2022-05-19 2:00 PM  | 13.1 | 13.7 | 15.1 | 14.0 |
| 2022-05-19 3:00 PM  | 14.0 | 14.9 | 17.7 | 15.5 |
| 2022-05-19 4:00 PM  | 13.1 | 13.5 | 16.3 | 14.3 |
| 2022-05-19 5:00 PM  | 12.8 | 13.1 | 16.4 | 14.1 |
| 2022-05-19 6:00 PM  | 11.9 | 12.1 | 14.5 | 12.8 |
| 2022-05-19 7:00 PM  | 11.9 | 11.9 | 13.6 | 12.5 |
| 2022-05-19 8:00 PM  | 10.3 | 10.0 | 10.5 | 10.3 |
| 2022-05-19 9:00 PM  | 8.9  | 8.5  | 8.8  | 8.7  |

|                     |      |      |      |      |
|---------------------|------|------|------|------|
| 2022-05-19 10:00 PM | 7.9  | 7.4  | 7.5  | 7.6  |
| 2022-05-19 11:00 PM | 7.8  | 7.3  | 7.7  | 7.6  |
| 2022-05-20 12:00 AM | 7.4  | 7.0  | 7.3  | 7.2  |
| 2022-05-20 1:00 AM  | 6.5  | 6.4  | 6.7  | 6.5  |
| 2022-05-20 2:00 AM  | 6.2  | 5.9  | 6.4  | 6.2  |
| 2022-05-20 3:00 AM  | 6.3  | 5.9  | 6.3  | 6.2  |
| 2022-05-20 4:00 AM  | 6.5  | 6.1  | 6.5  | 6.4  |
| 2022-05-20 5:00 AM  | 6.8  | 6.6  | 6.8  | 6.7  |
| 2022-05-20 6:00 AM  | 7.1  | 6.9  | 7.0  | 7.0  |
| 2022-05-20 7:00 AM  | 6.8  | 6.6  | 6.8  | 6.7  |
| 2022-05-20 8:00 AM  | 6.4  | 6.1  | 6.4  | 6.3  |
| 2022-05-20 9:00 AM  | 6.9  | 6.5  | 6.9  | 6.8  |
| 2022-05-20 10:00 AM | 7.6  | 7.4  | 7.7  | 7.6  |
| 2022-05-20 11:00 AM | 8.1  | 8.0  | 8.3  | 8.1  |
| 2022-05-20 12:00 PM | 9.6  | 10.2 | 11.1 | 10.3 |
| 2022-05-20 1:00 PM  | 15.3 | 19.7 | 22.8 | 19.3 |
| 2022-05-20 2:00 PM  | 15.2 | 18.6 | 21.8 | 18.5 |
| 2022-05-20 3:00 PM  | 14.9 | 17.7 | 24.5 | 19.0 |
| 2022-05-20 4:00 PM  | 15.5 | 17.1 | 26.2 | 19.6 |
| 2022-05-20 5:00 PM  | 15.5 | 16.5 | 21.4 | 17.8 |
| 2022-05-20 6:00 PM  | 15.4 | 15.6 | 19.8 | 16.9 |
| 2022-05-20 7:00 PM  | 14.6 | 14.7 | 16.1 | 15.1 |
| 2022-05-20 8:00 PM  | 13.8 | 14.1 | 15.0 | 14.3 |
| 2022-05-20 9:00 PM  | 13.5 | 13.3 | 13.6 | 13.5 |
| 2022-05-20 10:00 PM | 10.9 | 10.9 | 10.9 | 10.9 |
| 2022-05-20 11:00 PM | 8.2  | 8.1  | 8.1  | 8.1  |
| 2022-05-21 12:00 AM | 7.1  | 6.7  | 6.5  | 6.8  |
| 2022-05-21 1:00 AM  | 6.3  | 5.7  | 5.8  | 5.9  |
| 2022-05-21 2:00 AM  | 5.5  | 5.2  | 5.2  | 5.3  |
| 2022-05-21 3:00 AM  | 5.2  | 4.7  | 4.8  | 4.9  |
| 2022-05-21 4:00 AM  | 4.8  | 4.2  | 4.4  | 4.5  |
| 2022-05-21 5:00 AM  | 4.6  | 3.7  | 3.7  | 4.0  |
| 2022-05-21 6:00 AM  | 4.1  | 3.1  | 3.0  | 3.4  |
| 2022-05-21 7:00 AM  | 3.5  | 2.6  | 2.4  | 2.8  |
| 2022-05-21 8:00 AM  | 4.3  | 3.3  | 3.4  | 3.7  |
| 2022-05-21 9:00 AM  | 6.0  | 5.6  | 5.7  | 5.8  |
| 2022-05-21 10:00 AM | 7.3  | 7.4  | 7.5  | 7.4  |
| 2022-05-21 11:00 AM | 7.6  | 7.9  | 8.8  | 8.1  |
| 2022-05-21 12:00 PM | 9.0  | 9.5  | 11.6 | 10.0 |
| 2022-05-21 1:00 PM  | 11.1 | 12.7 | 16.0 | 13.3 |
| 2022-05-21 2:00 PM  | 10.1 | 10.5 | 12.5 | 11.0 |
| 2022-05-21 3:00 PM  | 10.1 | 10.5 | 11.9 | 10.8 |
| 2022-05-21 4:00 PM  | 10.6 | 10.9 | 13.2 | 11.6 |
| 2022-05-21 5:00 PM  | 11.4 | 11.9 | 15.6 | 13.0 |
| 2022-05-21 6:00 PM  | 10.9 | 11.0 | 13.5 | 11.8 |

|                     |      |      |      |      |
|---------------------|------|------|------|------|
| 2022-05-21 7:00 PM  | 9.5  | 9.6  | 10.7 | 9.9  |
| 2022-05-21 8:00 PM  | 8.8  | 8.7  | 9.2  | 8.9  |
| 2022-05-21 9:00 PM  | 8.3  | 8.0  | 8.4  | 8.2  |
| 2022-05-21 10:00 PM | 7.6  | 7.2  | 7.4  | 7.4  |
| 2022-05-21 11:00 PM | 7.2  | 6.9  | 7.0  | 7.0  |
| 2022-05-22 12:00 AM | 6.9  | 6.5  | 6.7  | 6.7  |
| 2022-05-22 1:00 AM  | 6.7  | 6.3  | 6.3  | 6.4  |
| 2022-05-22 2:00 AM  | 6.2  | 5.7  | 5.8  | 5.9  |
| 2022-05-22 3:00 AM  | 5.5  | 5.1  | 5.1  | 5.2  |
| 2022-05-22 4:00 AM  | 5.2  | 4.5  | 4.7  | 4.8  |
| 2022-05-22 5:00 AM  | 5.0  | 4.4  | 4.6  | 4.7  |
| 2022-05-22 6:00 AM  | 5.1  | 4.5  | 4.8  | 4.8  |
| 2022-05-22 7:00 AM  | 5.3  | 4.8  | 4.9  | 5.0  |
| 2022-05-22 8:00 AM  | 5.6  | 5.2  | 5.3  | 5.4  |
| 2022-05-22 9:00 AM  | 6.5  | 6.3  | 6.6  | 6.5  |
| 2022-05-22 10:00 AM | 8.3  | 8.7  | 8.9  | 8.6  |
| 2022-05-22 11:00 AM | 11.5 | 14.2 | 11.2 | 12.3 |
| 2022-05-22 12:00 PM | 12.3 | 14.8 | 15.4 | 14.2 |
| 2022-05-22 1:00 PM  | 10.5 | 11.4 | 9.2  | 10.4 |
| 2022-05-22 2:00 PM  | 11.8 | 12.7 | 10.8 | 11.8 |
| 2022-05-22 3:00 PM  | 12.3 | 13.6 | 14.6 | 13.5 |
| 2022-05-22 4:00 PM  | 11.2 | 11.5 | 11.2 | 11.3 |
| 2022-05-22 5:00 PM  | 11.5 | 11.8 | 12.1 | 11.8 |
| 2022-05-22 6:00 PM  | 11.4 | 11.5 | 14.4 | 12.4 |
| 2022-05-22 7:00 PM  | 10.5 | 10.6 | 10.9 | 10.7 |
| 2022-05-22 8:00 PM  | 9.3  | 9.1  | 9.7  | 9.4  |
| 2022-05-22 9:00 PM  | 8.8  | 8.5  | 9.0  | 8.8  |
| 2022-05-22 10:00 PM | 7.4  | 6.9  | 7.6  | 7.3  |
| 2022-05-22 11:00 PM | 6.4  | 5.8  | 6.6  | 6.3  |
| 2022-05-23 12:00 AM | 5.6  | 5.0  | 5.8  | 5.5  |
| 2022-05-23 1:00 AM  | 4.8  | 4.1  | 5.1  | 4.7  |
| 2022-05-23 2:00 AM  | 3.9  | 3.0  | 4.3  | 3.7  |
| 2022-05-23 3:00 AM  | 3.5  | 2.7  | 4.0  | 3.4  |
| 2022-05-23 4:00 AM  | 2.8  | 2.2  | 3.6  | 2.9  |
| 2022-05-23 5:00 AM  | 2.5  | 1.5  | 2.9  | 2.3  |
| 2022-05-23 6:00 AM  | 2.6  | 1.5  | 2.9  | 2.3  |
| 2022-05-23 7:00 AM  | 2.5  | 1.4  | 2.7  | 2.2  |
| 2022-05-23 8:00 AM  | 3.2  | 2.7  | 3.5  | 3.1  |
| 2022-05-23 9:00 AM  | 4.9  | 4.6  | 4.9  | 4.8  |
| 2022-05-23 10:00 AM | 8.0  | 9.1  | 6.6  | 7.9  |
| 2022-05-23 11:00 AM | 16.1 | 23.0 | 9.5  | 16.2 |
| 2022-05-23 12:00 PM | 19.0 | 25.8 | 11.6 | 18.8 |
| 2022-05-23 1:00 PM  | 16.0 | 18.9 | 13.2 | 16.0 |
| 2022-05-23 2:00 PM  | 15.6 | 18.4 | 14.6 | 16.2 |
| 2022-05-23 3:00 PM  | 15.8 | 20.2 | 22.4 | 19.5 |

|                     |      |      |      |      |
|---------------------|------|------|------|------|
| 2022-05-23 4:00 PM  | 15.3 | 16.7 | 23.7 | 18.6 |
| 2022-05-23 5:00 PM  | 15.6 | 16.4 | 26.8 | 19.6 |
| 2022-05-23 6:00 PM  | 14.1 | 14.6 | 17.0 | 15.2 |
| 2022-05-23 7:00 PM  | 13.1 | 13.3 | 14.4 | 13.6 |
| 2022-05-23 8:00 PM  | 12.1 | 12.1 | 12.9 | 12.4 |
| 2022-05-23 9:00 PM  | 11.0 | 10.9 | 11.8 | 11.2 |
| 2022-05-23 10:00 PM | 10.0 | 9.6  | 10.5 | 10.0 |
| 2022-05-23 11:00 PM | 8.9  | 8.3  | 9.2  | 8.8  |
| 2022-05-24 12:00 AM | 8.0  | 7.5  | 8.3  | 7.9  |
| 2022-05-24 1:00 AM  | 7.0  | 6.4  | 7.4  | 6.9  |
| 2022-05-24 2:00 AM  | 6.4  | 5.6  | 6.8  | 6.3  |
| 2022-05-24 3:00 AM  | 5.7  | 4.7  | 6.1  | 5.5  |
| 2022-05-24 4:00 AM  | 5.1  | 3.9  | 5.5  | 4.8  |
| 2022-05-24 5:00 AM  | 4.3  | 3.6  | 5.0  | 4.3  |
| 2022-05-24 6:00 AM  | 3.8  | 3.1  | 4.4  | 3.8  |
| 2022-05-24 7:00 AM  | 4.4  | 3.8  | 4.9  | 4.4  |
| 2022-05-24 8:00 AM  | 5.6  | 4.9  | 5.8  | 5.4  |
| 2022-05-24 9:00 AM  | 8.0  | 8.1  | 7.4  | 7.8  |
| 2022-05-24 10:00 AM | 10.7 | 12.1 | 8.9  | 10.6 |
| 2022-05-24 11:00 AM | 16.4 | 22.3 | 10.3 | 16.3 |
| 2022-05-24 12:00 PM | 19.0 | 25.8 | 12.1 | 19.0 |
| 2022-05-24 1:00 PM  | 19.4 | 25.3 | 14.1 | 19.6 |
| 2022-05-24 2:00 PM  | 18.5 | 22.6 | 16.3 | 19.1 |
| 2022-05-24 3:00 PM  | 17.3 | 20.1 | 20.4 | 19.3 |
| 2022-05-24 4:00 PM  | 17.5 | 19.0 | 22.2 | 19.6 |
| 2022-05-24 5:00 PM  | 16.9 | 17.7 | 21.2 | 18.6 |
| 2022-05-24 6:00 PM  | 16.4 | 17.2 | 19.2 | 17.6 |
| 2022-05-24 7:00 PM  | 15.9 | 16.6 | 17.5 | 16.7 |
| 2022-05-24 8:00 PM  | 15.0 | 15.4 | 16.2 | 15.5 |
| 2022-05-24 9:00 PM  | 13.9 | 14.1 | 14.6 | 14.2 |
| 2022-05-24 10:00 PM | 12.7 | 12.5 | 12.8 | 12.7 |
| 2022-05-24 11:00 PM | 11.4 | 10.9 | 11.5 | 11.3 |
| 2022-05-25 12:00 AM | 10.5 | 9.8  | 10.7 | 10.3 |
| 2022-05-25 1:00 AM  | 9.8  | 9.2  | 10.1 | 9.7  |
| 2022-05-25 2:00 AM  | 9.4  | 8.7  | 9.6  | 9.2  |
| 2022-05-25 3:00 AM  | 8.8  | 8.3  | 9.3  | 8.8  |
| 2022-05-25 4:00 AM  | 8.4  | 7.7  | 8.8  | 8.3  |
| 2022-05-25 5:00 AM  | 8.0  | 7.2  | 8.4  | 7.9  |
| 2022-05-25 6:00 AM  | 7.8  | 7.1  | 8.2  | 7.7  |
| 2022-05-25 7:00 AM  | 7.8  | 7.3  | 8.2  | 7.8  |
| 2022-05-25 8:00 AM  | 8.4  | 8.0  | 8.7  | 8.4  |
| 2022-05-25 9:00 AM  | 9.0  | 8.7  | 9.1  | 8.9  |
| 2022-05-25 10:00 AM | 9.7  | 9.6  | 9.6  | 9.6  |
| 2022-05-25 11:00 AM | 9.8  | 9.8  | 9.7  | 9.8  |
| 2022-05-25 12:00 PM | 10.0 | 10.0 | 10.0 | 10.0 |

|                     |      |      |      |      |
|---------------------|------|------|------|------|
| 2022-05-25 1:00 PM  | 10.8 | 10.9 | 10.7 | 10.8 |
| 2022-05-25 2:00 PM  | 11.6 | 12.1 | 11.7 | 11.8 |
| 2022-05-25 3:00 PM  | 11.9 | 12.3 | 12.0 | 12.1 |
| 2022-05-25 4:00 PM  | 10.9 | 10.9 | 10.9 | 10.9 |
| 2022-05-25 5:00 PM  | 10.0 | 9.9  | 10.1 | 10.0 |
| 2022-05-25 6:00 PM  | 9.6  | 9.3  | 9.6  | 9.5  |
| 2022-05-25 7:00 PM  | 9.5  | 9.3  | 9.6  | 9.5  |
| 2022-05-25 8:00 PM  | 9.4  | 9.2  | 9.4  | 9.3  |
| 2022-05-25 9:00 PM  | 9.2  | 8.9  | 9.2  | 9.1  |
| 2022-05-25 10:00 PM | 9.0  | 8.8  | 9.0  | 8.9  |
| 2022-05-25 11:00 PM | 8.8  | 8.7  | 8.9  | 8.8  |
| 2022-05-26 12:00 AM | 8.9  | 8.7  | 8.9  | 8.8  |
| 2022-05-26 1:00 AM  | 9.1  | 9.0  | 9.2  | 9.1  |
| 2022-05-26 2:00 AM  | 9.1  | 9.0  | 9.2  | 9.1  |
| 2022-05-26 3:00 AM  | 9.1  | 9.0  | 9.2  | 9.1  |
| 2022-05-26 4:00 AM  | 9.1  | 9.0  | 9.2  | 9.1  |
| 2022-05-26 5:00 AM  | 9.0  | 9.0  | 9.1  | 9.0  |
| 2022-05-26 6:00 AM  | 9.0  | 8.9  | 9.1  | 9.0  |
| 2022-05-26 7:00 AM  | 9.0  | 8.9  | 9.1  | 9.0  |
| 2022-05-26 8:00 AM  | 9.3  | 9.1  | 9.2  | 9.2  |
| 2022-05-26 9:00 AM  | 9.7  | 9.6  | 9.6  | 9.6  |
| 2022-05-26 10:00 AM | 10.7 | 10.6 | 10.5 | 10.6 |
| 2022-05-26 11:00 AM | 12.0 | 12.2 | 11.6 | 11.9 |
| 2022-05-26 12:00 PM | 12.1 | 12.7 | 11.8 | 12.2 |
| 2022-05-26 1:00 PM  | 12.3 | 12.4 | 11.8 | 12.2 |
| 2022-05-26 2:00 PM  | 12.8 | 12.9 | 12.6 | 12.8 |
| 2022-05-26 3:00 PM  | 13.5 | 13.8 | 13.2 | 13.5 |
| 2022-05-26 4:00 PM  | 14.3 | 14.6 | 15.0 | 14.6 |
| 2022-05-26 5:00 PM  | 14.2 | 14.4 | 13.9 | 14.2 |
| 2022-05-26 6:00 PM  | 13.9 | 13.9 | 13.5 | 13.8 |
| 2022-05-26 7:00 PM  | 13.9 | 14.0 | 13.4 | 13.8 |
| 2022-05-26 8:00 PM  | 13.3 | 13.6 | 13.0 | 13.3 |
| 2022-05-26 9:00 PM  | 13.1 | 13.1 | 12.6 | 12.9 |
| 2022-05-26 10:00 PM | 12.1 | 12.2 | 12.0 | 12.1 |
| 2022-05-26 11:00 PM | 11.6 | 11.5 | 11.5 | 11.5 |
| 2022-05-27 12:00 AM | 11.4 | 11.2 | 11.3 | 11.3 |
| 2022-05-27 1:00 AM  | 11.1 | 10.9 | 11.1 | 11.0 |
| 2022-05-27 2:00 AM  | 10.9 | 10.7 | 10.9 | 10.8 |
| 2022-05-27 3:00 AM  | 10.7 | 10.5 | 10.8 | 10.7 |
| 2022-05-27 4:00 AM  | 10.5 | 10.1 | 10.5 | 10.4 |
| 2022-05-27 5:00 AM  | 10.1 | 9.7  | 10.3 | 10.0 |
| 2022-05-27 6:00 AM  | 10.1 | 9.7  | 10.3 | 10.0 |
| 2022-05-27 7:00 AM  | 10.3 | 10.0 | 10.4 | 10.2 |
| 2022-05-27 8:00 AM  | 10.6 | 10.5 | 10.3 | 10.5 |
| 2022-05-27 9:00 AM  | 10.4 | 10.1 | 10.2 | 10.2 |



|                     |      |      |      |      |
|---------------------|------|------|------|------|
| 2022-05-27 10:00 AM | 13.5 | 14.4 | 11.4 | 13.1 |
| 2022-05-27 11:00 AM | 19.8 | 25.5 | 14.2 | 19.8 |
| 2022-05-27 12:00 PM | 19.4 | 24.7 | 15.6 | 19.9 |
| 2022-05-27 1:00 PM  | 18.7 | 21.7 | 16.4 | 18.9 |
| 2022-05-27 2:00 PM  | 19.7 | 24.0 | 18.2 | 20.6 |
| 2022-05-27 3:00 PM  | 18.9 | 24.0 | 26.9 | 23.3 |
| 2022-05-27 4:00 PM  | 18.3 | 20.6 | 31.3 | 23.4 |
| 2022-05-27 5:00 PM  | 18.4 | 19.8 | 28.6 | 22.3 |
| 2022-05-27 6:00 PM  | 17.3 | 17.9 | 20.4 | 18.5 |
| 2022-05-27 7:00 PM  | 16.0 | 16.2 | 17.1 | 16.4 |
| 2022-05-27 8:00 PM  | 15.1 | 15.1 | 15.5 | 15.2 |
| 2022-05-27 9:00 PM  | 14.6 | 14.4 | 14.7 | 14.6 |
| 2022-05-27 10:00 PM | 13.1 | 12.5 | 13.3 | 13.0 |
| 2022-05-27 11:00 PM | 12.3 | 11.6 | 12.5 | 12.1 |
| 2022-05-28 12:00 AM | 11.9 | 11.1 | 12.2 | 11.7 |
| 2022-05-28 1:00 AM  | 11.0 | 10.3 | 11.4 | 10.9 |
| 2022-05-28 2:00 AM  | 10.6 | 9.6  | 10.9 | 10.4 |
| 2022-05-28 3:00 AM  | 9.8  | 9.1  | 10.5 | 9.8  |
| 2022-05-28 4:00 AM  | 9.6  | 8.8  | 10.3 | 9.6  |
| 2022-05-28 5:00 AM  | 9.5  | 8.8  | 10.0 | 9.4  |
| 2022-05-28 6:00 AM  | 9.5  | 8.9  | 10.1 | 9.5  |
| 2022-05-28 7:00 AM  | 9.7  | 9.2  | 10.3 | 9.7  |
| 2022-05-28 8:00 AM  | 10.4 | 9.9  | 10.6 | 10.3 |
| 2022-05-28 9:00 AM  | 10.3 | 9.8  | 10.4 | 10.2 |
| 2022-05-28 10:00 AM | 10.3 | 9.9  | 10.5 | 10.2 |
| 2022-05-28 11:00 AM | 10.6 | 10.4 | 10.7 | 10.6 |
| 2022-05-28 12:00 PM | 11.2 | 11.2 | 11.3 | 11.2 |
| 2022-05-28 1:00 PM  | 11.6 | 11.5 | 11.5 | 11.5 |
| 2022-05-28 2:00 PM  | 12.0 | 12.0 | 12.0 | 12.0 |
| 2022-05-28 3:00 PM  | 11.7 | 11.5 | 11.7 | 11.6 |
| 2022-05-28 4:00 PM  | 11.1 | 10.7 | 11.1 | 11.0 |
| 2022-05-28 5:00 PM  | 10.7 | 10.3 | 10.8 | 10.6 |
| 2022-05-28 6:00 PM  | 10.9 | 10.5 | 10.9 | 10.8 |
| 2022-05-28 7:00 PM  | 11.1 | 10.9 | 11.1 | 11.0 |
| 2022-05-28 8:00 PM  | 10.8 | 10.5 | 10.8 | 10.7 |
| 2022-05-28 9:00 PM  | 10.5 | 10.3 | 10.6 | 10.5 |
| 2022-05-28 10:00 PM | 10.4 | 10.0 | 10.4 | 10.3 |
| 2022-05-28 11:00 PM | 10.2 | 9.9  | 10.3 | 10.1 |
| 2022-05-29 12:00 AM | 10.3 | 10.0 | 10.3 | 10.2 |
| 2022-05-29 1:00 AM  | 10.4 | 10.2 | 10.4 | 10.3 |
| 2022-05-29 2:00 AM  | 10.1 | 9.9  | 10.2 | 10.1 |
| 2022-05-29 3:00 AM  | 9.7  | 9.5  | 9.8  | 9.7  |
| 2022-05-29 4:00 AM  | 9.2  | 8.9  | 9.3  | 9.1  |
| 2022-05-29 5:00 AM  | 8.9  | 8.5  | 9.0  | 8.8  |
| 2022-05-29 6:00 AM  | 8.8  | 8.4  | 9.0  | 8.7  |

|                     |      |      |      |      |
|---------------------|------|------|------|------|
| 2022-05-29 7:00 AM  | 8.9  | 8.5  | 9.0  | 8.8  |
| 2022-05-29 8:00 AM  | 9.0  | 8.6  | 9.2  | 8.9  |
| 2022-05-29 9:00 AM  | 9.5  | 9.2  | 9.6  | 9.4  |
| 2022-05-29 10:00 AM | 11.8 | 11.9 | 10.5 | 11.4 |
| 2022-05-29 11:00 AM | 15.0 | 17.0 | 10.9 | 14.3 |
| 2022-05-29 12:00 PM | 16.0 | 19.3 | 12.0 | 15.8 |
| 2022-05-29 1:00 PM  | 15.1 | 16.8 | 13.1 | 15.0 |
| 2022-05-29 2:00 PM  | 14.2 | 14.9 | 13.6 | 14.2 |
| 2022-05-29 3:00 PM  | 14.1 | 14.8 | 14.6 | 14.5 |
| 2022-05-29 4:00 PM  | 13.6 | 13.7 | 13.3 | 13.5 |
| 2022-05-29 5:00 PM  | 12.2 | 11.9 | 11.9 | 12.0 |
| 2022-05-29 6:00 PM  | 12.8 | 12.6 | 12.9 | 12.8 |
| 2022-05-29 7:00 PM  | 13.1 | 13.0 | 13.4 | 13.2 |
| 2022-05-29 8:00 PM  | 12.8 | 12.7 | 12.6 | 12.7 |
| 2022-05-29 9:00 PM  | 12.2 | 11.9 | 12.0 | 12.0 |
| 2022-05-29 10:00 PM | 11.7 | 11.4 | 11.5 | 11.5 |
| 2022-05-29 11:00 PM | 11.7 | 11.5 | 11.6 | 11.6 |
| 2022-05-30 12:00 AM | 11.6 | 11.3 | 11.4 | 11.4 |
| 2022-05-30 1:00 AM  | 11.3 | 11.0 | 11.2 | 11.2 |
| 2022-05-30 2:00 AM  | 11.2 | 10.8 | 11.1 | 11.0 |
| 2022-05-30 3:00 AM  | 11.1 | 10.7 | 11.0 | 10.9 |
| 2022-05-30 4:00 AM  | 10.6 | 10.2 | 10.6 | 10.5 |
| 2022-05-30 5:00 AM  | 10.5 | 10.1 | 10.5 | 10.4 |
| 2022-05-30 6:00 AM  | 10.5 | 10.0 | 10.4 | 10.3 |
| 2022-05-30 7:00 AM  | 10.5 | 10.1 | 10.4 | 10.3 |
| 2022-05-30 8:00 AM  | 11.0 | 10.8 | 10.8 | 10.9 |
| 2022-05-30 9:00 AM  | 10.8 | 10.6 | 10.7 | 10.7 |
| 2022-05-30 10:00 AM | 10.5 | 10.2 | 10.4 | 10.4 |
| 2022-05-30 11:00 AM | 12.2 | 12.4 | 12.1 | 12.2 |
| 2022-05-30 12:00 PM | 12.1 | 12.2 | 12.0 | 12.1 |
| 2022-05-30 1:00 PM  | 13.4 | 14.2 | 13.0 | 13.5 |
| 2022-05-30 2:00 PM  | 11.9 | 11.9 | 11.8 | 11.9 |
| 2022-05-30 3:00 PM  | 12.5 | 12.8 | 12.9 | 12.7 |
| 2022-05-30 4:00 PM  | 14.4 | 15.1 | 15.1 | 14.9 |
| 2022-05-30 5:00 PM  | 15.0 | 15.8 | 19.9 | 16.9 |
| 2022-05-30 6:00 PM  | 15.0 | 15.6 | 18.0 | 16.2 |
| 2022-05-30 7:00 PM  | 14.7 | 15.2 | 15.5 | 15.1 |
| 2022-05-30 8:00 PM  | 14.4 | 14.7 | 14.7 | 14.6 |
| 2022-05-30 9:00 PM  | 14.1 | 14.4 | 14.2 | 14.2 |
| 2022-05-30 10:00 PM | 13.2 | 13.3 | 13.3 | 13.3 |
| 2022-05-30 11:00 PM | 12.5 | 12.3 | 12.5 | 12.4 |
| 2022-05-31 12:00 AM | 12.3 | 12.1 | 12.3 | 12.2 |
| 2022-05-31 1:00 AM  | 12.1 | 11.9 | 12.2 | 12.1 |
| 2022-05-31 2:00 AM  | 11.7 | 11.4 | 11.8 | 11.6 |
| 2022-05-31 3:00 AM  | 11.2 | 10.8 | 11.3 | 11.1 |

|                     |      |      |      |      |
|---------------------|------|------|------|------|
| 2022-05-31 4:00 AM  | 11.0 | 10.5 | 11.1 | 10.9 |
| 2022-05-31 5:00 AM  | 10.7 | 10.2 | 10.8 | 10.6 |
| 2022-05-31 6:00 AM  | 10.6 | 10.1 | 10.7 | 10.5 |
| 2022-05-31 7:00 AM  | 10.5 | 10.0 | 10.6 | 10.4 |
| 2022-05-31 8:00 AM  | 10.9 | 10.6 | 10.9 | 10.8 |
| 2022-05-31 9:00 AM  | 11.7 | 11.7 | 11.5 | 11.6 |
| 2022-05-31 10:00 AM | 13.7 | 14.4 | 12.7 | 13.6 |
| 2022-05-31 11:00 AM | 16.3 | 18.8 | 13.3 | 16.1 |
| 2022-05-31 12:00 PM | 19.0 | 23.8 | 16.7 | 19.8 |
| 2022-05-31 1:00 PM  | 19.2 | 23.3 | 18.4 | 20.3 |
| 2022-05-31 2:00 PM  | 18.3 | 21.2 | 19.2 | 19.6 |
| 2022-05-31 3:00 PM  | 18.7 | 21.4 | 20.0 | 20.0 |
| 2022-05-31 4:00 PM  | 18.8 | 21.1 | 21.4 | 20.4 |
| 2022-05-31 5:00 PM  | 17.9 | 19.6 | 19.8 | 19.1 |
| 2022-05-31 6:00 PM  | 17.8 | 19.3 | 21.1 | 19.4 |
| 2022-05-31 7:00 PM  | 16.7 | 17.7 | 17.4 | 17.3 |
| 2022-05-31 8:00 PM  | 16.0 | 16.6 | 16.5 | 16.4 |
| 2022-05-31 9:00 PM  | 15.2 | 15.5 | 15.5 | 15.4 |
| 2022-05-31 10:00 PM | 14.2 | 13.9 | 14.2 | 14.1 |
| 2022-05-31 11:00 PM | 13.1 | 12.5 | 13.2 | 12.9 |
| 2022-06-01 12:00 AM | 12.9 | 12.2 | 12.9 | 12.7 |
| 2022-06-01 1:00 AM  | 12.1 | 11.2 | 12.0 | 11.8 |
| 2022-06-01 2:00 AM  | 11.4 | 10.4 | 11.4 | 11.1 |
| 2022-06-01 3:00 AM  | 11.1 | 10.2 | 11.2 | 10.8 |
| 2022-06-01 4:00 AM  | 11.0 | 10.2 | 11.1 | 10.8 |
| 2022-06-01 5:00 AM  | 10.3 | 9.6  | 10.6 | 10.2 |
| 2022-06-01 6:00 AM  | 9.9  | 9.1  | 10.1 | 9.7  |
| 2022-06-01 7:00 AM  | 9.4  | 8.6  | 9.6  | 9.2  |
| 2022-06-01 8:00 AM  | 9.9  | 9.3  | 10.1 | 9.8  |
| 2022-06-01 9:00 AM  | 10.0 | 9.6  | 9.9  | 9.8  |
| 2022-06-01 10:00 AM | 11.6 | 11.6 | 10.7 | 11.3 |
| 2022-06-01 11:00 AM | 15.9 | 18.4 | 11.6 | 15.3 |
| 2022-06-01 12:00 PM | 16.5 | 20.7 | 12.7 | 16.6 |
| 2022-06-01 1:00 PM  | 15.5 | 18.4 | 12.3 | 15.4 |
| 2022-06-01 2:00 PM  | 16.1 | 20.8 | 14.5 | 17.1 |
| 2022-06-01 3:00 PM  | 15.7 | 21.6 | 22.8 | 20.0 |
| 2022-06-01 4:00 PM  | 16.0 | 18.7 | 26.0 | 20.2 |
| 2022-06-01 5:00 PM  | 16.2 | 18.2 | 28.2 | 20.9 |
| 2022-06-01 6:00 PM  | 16.1 | 17.2 | 22.8 | 18.7 |
| 2022-06-01 7:00 PM  | 15.5 | 16.3 | 17.1 | 16.3 |
| 2022-06-01 8:00 PM  | 15.3 | 15.8 | 16.1 | 15.7 |
| 2022-06-01 9:00 PM  | 14.1 | 13.9 | 14.7 | 14.2 |
| 2022-06-01 10:00 PM | 12.8 | 12.1 | 13.4 | 12.8 |
| 2022-06-01 11:00 PM | 11.8 | 10.9 | 12.3 | 11.7 |
| 2022-06-02 12:00 AM | 11.1 | 9.9  | 11.6 | 10.9 |

|                     |      |      |      |      |
|---------------------|------|------|------|------|
| 2022-06-02 1:00 AM  | 10.5 | 9.2  | 11.0 | 10.2 |
| 2022-06-02 2:00 AM  | 9.9  | 8.7  | 10.5 | 9.7  |
| 2022-06-02 3:00 AM  | 9.6  | 8.3  | 10.1 | 9.3  |
| 2022-06-02 4:00 AM  | 9.3  | 8.1  | 9.8  | 9.1  |
| 2022-06-02 5:00 AM  | 8.7  | 7.2  | 9.1  | 8.3  |
| 2022-06-02 6:00 AM  | 8.3  | 7.0  | 9.0  | 8.1  |
| 2022-06-02 7:00 AM  | 8.1  | 6.8  | 8.6  | 7.8  |
| 2022-06-02 8:00 AM  | 9.0  | 8.1  | 9.2  | 8.8  |
| 2022-06-02 9:00 AM  | 10.1 | 9.7  | 10.1 | 10.0 |
| 2022-06-02 10:00 AM | 12.6 | 12.8 | 11.1 | 12.2 |
| 2022-06-02 11:00 AM | 17.5 | 20.0 | 12.0 | 16.5 |
| 2022-06-02 12:00 PM | 17.4 | 21.1 | 12.5 | 17.0 |
| 2022-06-02 1:00 PM  | 18.6 | 23.1 | 13.8 | 18.5 |
| 2022-06-02 2:00 PM  | 18.2 | 22.6 | 15.9 | 18.9 |
| 2022-06-02 3:00 PM  | 16.8 | 19.6 | 18.2 | 18.2 |
| 2022-06-02 4:00 PM  | 15.8 | 16.9 | 15.5 | 16.1 |
| 2022-06-02 5:00 PM  | 16.5 | 18.3 | 20.9 | 18.6 |
| 2022-06-02 6:00 PM  | 16.5 | 18.0 | 19.0 | 17.8 |
| 2022-06-02 7:00 PM  | 15.7 | 16.7 | 16.3 | 16.2 |
| 2022-06-02 8:00 PM  | 14.9 | 15.4 | 15.1 | 15.1 |
| 2022-06-02 9:00 PM  | 13.9 | 13.9 | 13.9 | 13.9 |
| 2022-06-02 10:00 PM | 13.1 | 12.7 | 13.0 | 12.9 |
| 2022-06-02 11:00 PM | 12.6 | 11.9 | 12.7 | 12.4 |
| 2022-06-03 12:00 AM | 11.9 | 11.0 | 12.2 | 11.7 |
| 2022-06-03 1:00 AM  | 12.0 | 11.3 | 12.1 | 11.8 |
| 2022-06-03 2:00 AM  | 11.8 | 11.2 | 11.9 | 11.6 |
| 2022-06-03 3:00 AM  | 11.3 | 10.7 | 11.5 | 11.2 |
| 2022-06-03 4:00 AM  | 11.0 | 10.4 | 11.2 | 10.9 |
| 2022-06-03 5:00 AM  | 10.8 | 10.0 | 11.0 | 10.6 |
| 2022-06-03 6:00 AM  | 10.3 | 9.6  | 10.6 | 10.2 |
| 2022-06-03 7:00 AM  | 9.8  | 9.1  | 10.3 | 9.7  |
| 2022-06-03 8:00 AM  | 9.8  | 9.0  | 10.1 | 9.6  |
| 2022-06-03 9:00 AM  | 10.0 | 9.5  | 10.2 | 9.9  |
| 2022-06-03 10:00 AM | 10.7 | 10.6 | 10.7 | 10.7 |
| 2022-06-03 11:00 AM | 12.3 | 13.2 | 11.4 | 12.3 |
| 2022-06-03 12:00 PM | 15.2 | 18.6 | 12.1 | 15.3 |
| 2022-06-03 1:00 PM  | 15.5 | 19.1 | 13.0 | 15.9 |
| 2022-06-03 2:00 PM  | 15.6 | 19.3 | 14.2 | 16.4 |
| 2022-06-03 3:00 PM  | 13.8 | 16.8 | 16.7 | 15.8 |
| 2022-06-03 4:00 PM  | 14.0 | 16.0 | 21.0 | 17.0 |
| 2022-06-03 5:00 PM  | 14.4 | 15.7 | 17.7 | 15.9 |
| 2022-06-03 6:00 PM  | 12.8 | 11.9 | 13.5 | 12.7 |
| 2022-06-03 7:00 PM  | 12.1 | 11.4 | 12.5 | 12.0 |
| 2022-06-03 8:00 PM  | 11.4 | 11.1 | 11.9 | 11.5 |
| 2022-06-03 9:00 PM  | 11.5 | 11.1 | 11.6 | 11.4 |

|                     |      |      |      |      |
|---------------------|------|------|------|------|
| 2022-06-03 10:00 PM | 11.3 | 10.9 | 11.5 | 11.2 |
| 2022-06-03 11:00 PM | 10.7 | 10.0 | 11.0 | 10.6 |
| 2022-06-04 12:00 AM | 10.4 | 9.6  | 10.7 | 10.2 |
| 2022-06-04 1:00 AM  | 9.9  | 9.0  | 10.3 | 9.7  |
| 2022-06-04 2:00 AM  | 8.6  | 7.3  | 9.4  | 8.4  |
| 2022-06-04 3:00 AM  | 8.2  | 6.7  | 8.9  | 7.9  |
| 2022-06-04 4:00 AM  | 7.7  | 6.2  | 8.4  | 7.4  |
| 2022-06-04 5:00 AM  | 7.1  | 5.6  | 8.0  | 6.9  |
| 2022-06-04 6:00 AM  | 6.5  | 5.0  | 7.4  | 6.3  |
| 2022-06-04 7:00 AM  | 6.6  | 5.1  | 7.5  | 6.4  |
| 2022-06-04 8:00 AM  | 7.6  | 6.7  | 8.3  | 7.5  |
| 2022-06-04 9:00 AM  | 8.6  | 8.2  | 8.7  | 8.5  |
| 2022-06-04 10:00 AM | 11.0 | 11.5 | 9.4  | 10.6 |
| 2022-06-04 11:00 AM | 16.3 | 19.1 | 10.3 | 15.2 |
| 2022-06-04 12:00 PM | 17.7 | 21.0 | 11.0 | 16.6 |
| 2022-06-04 1:00 PM  | 17.6 | 17.0 | 12.0 | 15.5 |
| 2022-06-04 2:00 PM  | 17.0 | 16.6 | 13.4 | 15.7 |
| 2022-06-04 3:00 PM  | 15.8 | 16.5 | 19.9 | 17.4 |
| 2022-06-04 4:00 PM  | 14.8 | 15.1 | 22.0 | 17.3 |
| 2022-06-04 5:00 PM  | 14.7 | 15.4 | 25.1 | 18.4 |
| 2022-06-04 6:00 PM  | 13.8 | 13.7 | 18.5 | 15.3 |
| 2022-06-04 7:00 PM  | 12.8 | 12.3 | 13.6 | 12.9 |
| 2022-06-04 8:00 PM  | 12.2 | 11.6 | 12.6 | 12.1 |
| 2022-06-04 9:00 PM  | 11.6 | 10.9 | 12.0 | 11.5 |
| 2022-06-04 10:00 PM | 10.8 | 9.9  | 11.3 | 10.7 |
| 2022-06-04 11:00 PM | 10.3 | 9.2  | 10.8 | 10.1 |
| 2022-06-05 12:00 AM | 9.7  | 8.7  | 10.4 | 9.6  |
| 2022-06-05 1:00 AM  | 9.2  | 8.2  | 10.1 | 9.2  |
| 2022-06-05 2:00 AM  | 8.7  | 7.3  | 9.4  | 8.5  |
| 2022-06-05 3:00 AM  | 8.1  | 6.4  | 9.1  | 7.9  |
| 2022-06-05 4:00 AM  | 7.5  | 5.7  | 8.6  | 7.3  |
| 2022-06-05 5:00 AM  | 7.2  | 5.3  | 8.3  | 6.9  |
| 2022-06-05 6:00 AM  | 6.8  | 5.1  | 7.8  | 6.6  |
| 2022-06-05 7:00 AM  | 6.6  | 4.9  | 7.5  | 6.3  |
| 2022-06-05 8:00 AM  | 7.1  | 5.9  | 8.1  | 7.0  |
| 2022-06-05 9:00 AM  | 8.3  | 7.8  | 8.7  | 8.3  |
| 2022-06-05 10:00 AM | 10.9 | 11.5 | 9.5  | 10.6 |
| 2022-06-05 11:00 AM | 15.9 | 18.4 | 10.5 | 14.9 |
| 2022-06-05 12:00 PM | 16.6 | 18.8 | 11.8 | 15.7 |
| 2022-06-05 1:00 PM  | 17.1 | 17.5 | 12.8 | 15.8 |
| 2022-06-05 2:00 PM  | 17.0 | 16.6 | 14.0 | 15.9 |
| 2022-06-05 3:00 PM  | 15.9 | 16.6 | 21.5 | 18.0 |
| 2022-06-05 4:00 PM  | 15.1 | 15.7 | 22.7 | 17.8 |
| 2022-06-05 5:00 PM  | 14.9 | 15.1 | 19.3 | 16.4 |
| 2022-06-05 6:00 PM  | 14.7 | 14.9 | 19.3 | 16.3 |

|                     |      |      |      |      |
|---------------------|------|------|------|------|
| 2022-06-05 7:00 PM  | 13.3 | 12.8 | 14.1 | 13.4 |
| 2022-06-05 8:00 PM  | 12.7 | 12.2 | 13.2 | 12.7 |
| 2022-06-05 9:00 PM  | 12.1 | 11.4 | 12.3 | 11.9 |
| 2022-06-05 10:00 PM | 11.4 | 10.6 | 11.9 | 11.3 |
| 2022-06-05 11:00 PM | 11.0 | 10.2 | 11.6 | 10.9 |
| 2022-06-06 12:00 AM | 10.8 | 9.9  | 11.2 | 10.6 |
| 2022-06-06 1:00 AM  | 10.5 | 9.6  | 11.1 | 10.4 |
| 2022-06-06 2:00 AM  | 10.6 | 9.9  | 11.1 | 10.5 |
| 2022-06-06 3:00 AM  | 10.7 | 10.1 | 11.0 | 10.6 |
| 2022-06-06 4:00 AM  | 10.7 | 10.1 | 11.0 | 10.6 |
| 2022-06-06 5:00 AM  | 10.9 | 10.6 | 11.2 | 10.9 |
| 2022-06-06 6:00 AM  | 10.8 | 10.4 | 11.1 | 10.8 |
| 2022-06-06 7:00 AM  | 10.9 | 10.6 | 11.1 | 10.9 |
| 2022-06-06 8:00 AM  | 11.2 | 11.1 | 11.3 | 11.2 |
| 2022-06-06 9:00 AM  | 11.3 | 11.2 | 11.5 | 11.3 |
| 2022-06-06 10:00 AM | 11.3 | 11.2 | 11.5 | 11.3 |
| 2022-06-06 11:00 AM | 11.8 | 12.1 | 11.9 | 11.9 |
| 2022-06-06 12:00 PM | 11.8 | 11.9 | 11.9 | 11.9 |
| 2022-06-06 1:00 PM  | 12.6 | 13.1 | 12.6 | 12.8 |
| 2022-06-06 2:00 PM  | 14.4 | 15.0 | 14.2 | 14.5 |
| 2022-06-06 3:00 PM  | 15.3 | 16.4 | 21.0 | 17.6 |
| 2022-06-06 4:00 PM  | 16.5 | 17.3 | 26.5 | 20.1 |
| 2022-06-06 5:00 PM  | 16.5 | 17.6 | 26.8 | 20.3 |
| 2022-06-06 6:00 PM  | 15.8 | 16.5 | 21.0 | 17.8 |
| 2022-06-06 7:00 PM  | 14.8 | 15.0 | 16.1 | 15.3 |
| 2022-06-06 8:00 PM  | 14.3 | 14.3 | 15.2 | 14.6 |
| 2022-06-06 9:00 PM  | 14.2 | 14.2 | 14.8 | 14.4 |
| 2022-06-06 10:00 PM | 13.6 | 13.4 | 14.0 | 13.7 |
| 2022-06-06 11:00 PM | 12.4 | 11.9 | 12.9 | 12.4 |
| 2022-06-07 12:00 AM | 11.8 | 11.2 | 12.5 | 11.8 |
| 2022-06-07 1:00 AM  | 11.4 | 10.6 | 12.1 | 11.4 |
| 2022-06-07 2:00 AM  | 11.1 | 10.4 | 11.8 | 11.1 |
| 2022-06-07 3:00 AM  | 10.6 | 9.8  | 11.4 | 10.6 |
| 2022-06-07 4:00 AM  | 9.8  | 9.0  | 10.6 | 9.8  |
| 2022-06-07 5:00 AM  | 9.2  | 8.4  | 10.0 | 9.2  |
| 2022-06-07 6:00 AM  | 8.9  | 8.0  | 9.6  | 8.8  |
| 2022-06-07 7:00 AM  | 8.8  | 8.1  | 9.6  | 8.8  |
| 2022-06-07 8:00 AM  | 9.3  | 8.8  | 10.0 | 9.4  |
| 2022-06-07 9:00 AM  | 10.5 | 10.4 | 10.8 | 10.6 |
| 2022-06-07 10:00 AM | 13.0 | 13.4 | 11.7 | 12.7 |
| 2022-06-07 11:00 AM | 17.6 | 18.8 | 12.8 | 16.4 |
| 2022-06-07 12:00 PM | 16.2 | 16.5 | 13.5 | 15.4 |
| 2022-06-07 1:00 PM  | 17.7 | 16.9 | 14.6 | 16.4 |
| 2022-06-07 2:00 PM  | 16.7 | 16.5 | 14.6 | 15.9 |
| 2022-06-07 3:00 PM  | 16.1 | 16.1 | 19.4 | 17.2 |

|                     |      |      |      |      |
|---------------------|------|------|------|------|
| 2022-06-07 4:00 PM  | 17.1 | 17.4 | 21.2 | 18.6 |
| 2022-06-07 5:00 PM  | 16.3 | 16.4 | 19.9 | 17.5 |
| 2022-06-07 6:00 PM  | 16.3 | 16.5 | 18.8 | 17.2 |
| 2022-06-07 7:00 PM  | 15.8 | 15.7 | 15.8 | 15.8 |
| 2022-06-07 8:00 PM  | 15.1 | 14.9 | 15.2 | 15.1 |
| 2022-06-07 9:00 PM  | 14.8 | 14.6 | 14.7 | 14.7 |
| 2022-06-07 10:00 PM | 13.5 | 13.0 | 13.6 | 13.4 |
| 2022-06-07 11:00 PM | 13.0 | 12.5 | 13.1 | 12.9 |
| 2022-06-08 12:00 AM | 12.2 | 11.5 | 12.6 | 12.1 |
| 2022-06-08 1:00 AM  | 12.0 | 11.3 | 12.3 | 11.9 |
| 2022-06-08 2:00 AM  | 11.9 | 11.4 | 12.2 | 11.8 |
| 2022-06-08 3:00 AM  | 11.5 | 10.9 | 11.8 | 11.4 |
| 2022-06-08 4:00 AM  | 11.0 | 10.1 | 11.3 | 10.8 |
| 2022-06-08 5:00 AM  | 10.8 | 9.9  | 11.3 | 10.7 |
| 2022-06-08 6:00 AM  | 11.0 | 10.5 | 11.5 | 11.0 |
| 2022-06-08 7:00 AM  | 11.2 | 10.8 | 11.6 | 11.2 |
| 2022-06-08 8:00 AM  | 11.7 | 11.6 | 11.8 | 11.7 |
| 2022-06-08 9:00 AM  | 12.7 | 13.1 | 12.3 | 12.7 |
| 2022-06-08 10:00 AM | 14.6 | 15.1 | 12.8 | 14.2 |
| 2022-06-08 11:00 AM | 19.9 | 21.4 | 13.8 | 18.4 |
| 2022-06-08 12:00 PM | 21.1 | 22.4 | 14.8 | 19.4 |
| 2022-06-08 1:00 PM  | 19.9 | 19.0 | 15.5 | 18.1 |
| 2022-06-08 2:00 PM  | 18.2 | 17.3 | 15.5 | 17.0 |
| 2022-06-08 3:00 PM  | 15.9 | 15.3 | 14.3 | 15.2 |
| 2022-06-08 4:00 PM  | 15.7 | 15.4 | 14.5 | 15.2 |
| 2022-06-08 5:00 PM  | 16.2 | 16.0 | 15.4 | 15.9 |
| 2022-06-08 6:00 PM  | 16.9 | 16.9 | 16.1 | 16.6 |
| 2022-06-08 7:00 PM  | 15.9 | 15.6 | 15.3 | 15.6 |
| 2022-06-08 8:00 PM  | 15.9 | 15.7 | 15.1 | 15.6 |
| 2022-06-08 9:00 PM  | 15.2 | 14.9 | 14.6 | 14.9 |
| 2022-06-08 10:00 PM | 14.4 | 13.9 | 13.9 | 14.1 |
| 2022-06-08 11:00 PM | 13.8 | 13.2 | 13.3 | 13.4 |
| 2022-06-09 12:00 AM | 13.4 | 12.9 | 13.2 | 13.2 |
| 2022-06-09 1:00 AM  | 13.2 | 12.8 | 13.1 | 13.0 |
| 2022-06-09 2:00 AM  | 12.9 | 12.3 | 12.8 | 12.7 |
| 2022-06-09 3:00 AM  | 12.3 | 11.7 | 12.3 | 12.1 |
| 2022-06-09 4:00 AM  | 11.8 | 11.0 | 11.9 | 11.6 |
| 2022-06-09 5:00 AM  | 11.7 | 11.4 | 11.8 | 11.6 |
| 2022-06-09 6:00 AM  | 11.6 | 11.4 | 11.8 | 11.6 |
| 2022-06-09 7:00 AM  | 11.7 | 11.4 | 11.9 | 11.7 |
| 2022-06-09 8:00 AM  | 12.4 | 12.4 | 12.3 | 12.4 |
| 2022-06-09 9:00 AM  | 13.3 | 13.5 | 12.7 | 13.2 |
| 2022-06-09 10:00 AM | 13.8 | 14.1 | 12.8 | 13.6 |
| 2022-06-09 11:00 AM | 16.5 | 17.4 | 13.3 | 15.7 |
| 2022-06-09 12:00 PM | 16.8 | 18.1 | 13.8 | 16.2 |

|                     |      |      |      |      |
|---------------------|------|------|------|------|
| 2022-06-09 1:00 PM  | 18.2 | 18.3 | 14.9 | 17.1 |
| 2022-06-09 2:00 PM  | 16.5 | 16.2 | 15.1 | 15.9 |
| 2022-06-09 3:00 PM  | 17.1 | 17.0 | 17.6 | 17.2 |
| 2022-06-09 4:00 PM  | 16.9 | 17.1 | 19.7 | 17.9 |
| 2022-06-09 5:00 PM  | 15.8 | 16.1 | 17.5 | 16.5 |
| 2022-06-09 6:00 PM  | 16.0 | 15.9 | 16.5 | 16.1 |
| 2022-06-09 7:00 PM  | 16.1 | 16.0 | 15.5 | 15.9 |
| 2022-06-09 8:00 PM  | 15.7 | 15.5 | 15.2 | 15.5 |
| 2022-06-09 9:00 PM  | 15.4 | 15.0 | 15.1 | 15.2 |
| 2022-06-09 10:00 PM | 15.0 | 14.7 | 14.7 | 14.8 |
| 2022-06-09 11:00 PM | 13.9 | 13.3 | 14.0 | 13.7 |
| 2022-06-10 12:00 AM | 13.3 | 12.8 | 13.6 | 13.2 |
| 2022-06-10 1:00 AM  | 13.1 | 12.6 | 13.3 | 13.0 |
| 2022-06-10 2:00 AM  | 12.4 | 11.8 | 12.7 | 12.3 |
| 2022-06-10 3:00 AM  | 12.3 | 11.9 | 12.7 | 12.3 |
| 2022-06-10 4:00 AM  | 12.1 | 11.6 | 12.4 | 12.0 |
| 2022-06-10 5:00 AM  | 11.5 | 10.7 | 12.0 | 11.4 |
| 2022-06-10 6:00 AM  | 11.0 | 10.2 | 11.5 | 10.9 |
| 2022-06-10 7:00 AM  | 10.9 | 10.2 | 11.3 | 10.8 |
| 2022-06-10 8:00 AM  | 10.8 | 10.2 | 11.3 | 10.8 |
| 2022-06-10 9:00 AM  | 11.8 | 11.7 | 11.9 | 11.8 |
| 2022-06-10 10:00 AM | 14.0 | 14.7 | 12.6 | 13.8 |
| 2022-06-10 11:00 AM | 15.7 | 16.4 | 13.7 | 15.3 |
| 2022-06-10 12:00 PM | 18.1 | 19.8 | 14.6 | 17.5 |
| 2022-06-10 1:00 PM  | 19.2 | 19.8 | 15.5 | 18.2 |
| 2022-06-10 2:00 PM  | 19.2 | 19.3 | 16.7 | 18.4 |
| 2022-06-10 3:00 PM  | 18.8 | 19.1 | 22.4 | 20.1 |
| 2022-06-10 4:00 PM  | 18.7 | 19.5 | 25.3 | 21.2 |
| 2022-06-10 5:00 PM  | 18.7 | 19.7 | 24.8 | 21.1 |
| 2022-06-10 6:00 PM  | 18.4 | 19.0 | 20.2 | 19.2 |
| 2022-06-10 7:00 PM  | 17.3 | 17.4 | 17.0 | 17.2 |
| 2022-06-10 8:00 PM  | 17.2 | 17.4 | 16.5 | 17.0 |
| 2022-06-10 9:00 PM  | 16.6 | 16.5 | 16.2 | 16.4 |
| 2022-06-10 10:00 PM | 15.7 | 15.4 | 15.8 | 15.6 |
| 2022-06-10 11:00 PM | 14.0 | 13.2 | 14.5 | 13.9 |
| 2022-06-11 12:00 AM | 13.0 | 12.3 | 13.7 | 13.0 |
| 2022-06-11 1:00 AM  | 12.4 | 11.6 | 13.1 | 12.4 |
| 2022-06-11 2:00 AM  | 12.3 | 11.6 | 13.1 | 12.3 |
| 2022-06-11 3:00 AM  | 12.3 | 11.7 | 12.9 | 12.3 |
| 2022-06-11 4:00 AM  | 11.7 | 11.0 | 12.4 | 11.7 |
| 2022-06-11 5:00 AM  | 11.2 | 10.4 | 12.0 | 11.2 |
| 2022-06-11 6:00 AM  | 10.9 | 10.1 | 11.6 | 10.9 |
| 2022-06-11 7:00 AM  | 11.2 | 10.6 | 11.8 | 11.2 |
| 2022-06-11 8:00 AM  | 11.5 | 11.1 | 12.1 | 11.6 |
| 2022-06-11 9:00 AM  | 12.0 | 11.8 | 12.3 | 12.0 |



|                     |      |      |      |      |
|---------------------|------|------|------|------|
| 2022-06-11 10:00 AM | 13.7 | 14.1 | 13.0 | 13.6 |
| 2022-06-11 11:00 AM | 16.5 | 17.0 | 13.9 | 15.8 |
| 2022-06-11 12:00 PM | 16.3 | 16.5 | 14.2 | 15.7 |
| 2022-06-11 1:00 PM  | 19.6 | 18.3 | 15.2 | 17.7 |
| 2022-06-11 2:00 PM  | 19.5 | 18.4 | 16.5 | 18.1 |
| 2022-06-11 3:00 PM  | 18.3 | 18.5 | 21.2 | 19.3 |
| 2022-06-11 4:00 PM  | 17.8 | 18.1 | 24.7 | 20.2 |
| 2022-06-11 5:00 PM  | 17.4 | 18.0 | 24.7 | 20.0 |
| 2022-06-11 6:00 PM  | 16.9 | 17.1 | 20.4 | 18.1 |
| 2022-06-11 7:00 PM  | 15.3 | 14.9 | 16.1 | 15.4 |
| 2022-06-11 8:00 PM  | 14.6 | 14.1 | 15.2 | 14.6 |
| 2022-06-11 9:00 PM  | 14.2 | 13.6 | 14.8 | 14.2 |
| 2022-06-11 10:00 PM | 13.6 | 13.0 | 14.3 | 13.6 |
| 2022-06-11 11:00 PM | 12.8 | 12.0 | 13.6 | 12.8 |
| 2022-06-12 12:00 AM | 12.4 | 11.6 | 13.2 | 12.4 |
| 2022-06-12 1:00 AM  | 11.8 | 10.9 | 12.5 | 11.7 |
| 2022-06-12 2:00 AM  | 11.1 | 10.1 | 12.0 | 11.1 |
| 2022-06-12 3:00 AM  | 10.8 | 9.7  | 11.7 | 10.7 |
| 2022-06-12 4:00 AM  | 10.2 | 9.1  | 11.1 | 10.1 |
| 2022-06-12 5:00 AM  | 9.8  | 8.8  | 10.7 | 9.8  |
| 2022-06-12 6:00 AM  | 9.4  | 8.3  | 10.3 | 9.3  |
| 2022-06-12 7:00 AM  | 9.1  | 8.2  | 9.8  | 9.0  |
| 2022-06-12 8:00 AM  | 9.4  | 8.7  | 10.2 | 9.4  |
| 2022-06-12 9:00 AM  | 10.4 | 10.0 | 11.1 | 10.5 |
| 2022-06-12 10:00 AM | 13.0 | 13.2 | 11.9 | 12.7 |
| 2022-06-12 11:00 AM | 18.0 | 18.8 | 13.1 | 16.6 |
| 2022-06-12 12:00 PM | 19.0 | 19.6 | 14.2 | 17.6 |
| 2022-06-12 1:00 PM  | 19.8 | 17.3 | 14.9 | 17.3 |
| 2022-06-12 2:00 PM  | 17.9 | 16.9 | 15.5 | 16.8 |
| 2022-06-12 3:00 PM  | 17.5 | 17.5 | 18.3 | 17.8 |
| 2022-06-12 4:00 PM  | 17.2 | 17.7 | 20.8 | 18.6 |
| 2022-06-12 5:00 PM  | 16.6 | 16.5 | 17.1 | 16.7 |
| 2022-06-12 6:00 PM  | 16.4 | 16.4 | 17.2 | 16.7 |
| 2022-06-12 7:00 PM  | 16.2 | 15.9 | 15.9 | 16.0 |
| 2022-06-12 8:00 PM  | 15.3 | 14.9 | 15.0 | 15.1 |
| 2022-06-12 9:00 PM  | 14.8 | 14.4 | 14.7 | 14.6 |
| 2022-06-12 10:00 PM | 13.9 | 13.4 | 14.0 | 13.8 |
| 2022-06-12 11:00 PM | 13.5 | 12.9 | 13.5 | 13.3 |
| 2022-06-13 12:00 AM | 13.2 | 12.6 | 13.3 | 13.0 |
| 2022-06-13 1:00 AM  | 13.2 | 12.7 | 13.3 | 13.1 |
| 2022-06-13 2:00 AM  | 13.1 | 12.8 | 13.1 | 13.0 |
| 2022-06-13 3:00 AM  | 13.0 | 12.6 | 13.0 | 12.9 |
| 2022-06-13 4:00 AM  | 12.9 | 12.5 | 13.0 | 12.8 |
| 2022-06-13 5:00 AM  | 12.8 | 12.4 | 12.8 | 12.7 |
| 2022-06-13 6:00 AM  | 12.5 | 12.0 | 12.4 | 12.3 |

|                     |      |      |      |      |
|---------------------|------|------|------|------|
| 2022-06-13 7:00 AM  | 12.1 | 11.7 | 12.2 | 12.0 |
| 2022-06-13 8:00 AM  | 12.0 | 11.6 | 12.0 | 11.9 |
| 2022-06-13 9:00 AM  | 12.2 | 11.7 | 12.0 | 12.0 |
| 2022-06-13 10:00 AM | 12.6 | 12.1 | 12.3 | 12.3 |
| 2022-06-13 11:00 AM | 12.4 | 12.0 | 12.2 | 12.2 |
| 2022-06-13 12:00 PM | 12.7 | 12.4 | 12.4 | 12.5 |
| 2022-06-13 1:00 PM  | 13.2 | 12.8 | 12.6 | 12.9 |
| 2022-06-13 2:00 PM  | 13.2 | 12.7 | 12.6 | 12.8 |
| 2022-06-13 3:00 PM  | 12.7 | 12.3 | 12.4 | 12.5 |
| 2022-06-13 4:00 PM  | 12.7 | 12.3 | 12.3 | 12.4 |
| 2022-06-13 5:00 PM  | 12.3 | 12.0 | 12.1 | 12.1 |
| 2022-06-13 6:00 PM  | 12.2 | 11.9 | 12.0 | 12.0 |
| 2022-06-13 7:00 PM  | 12.2 | 11.9 | 12.0 | 12.0 |
| 2022-06-13 8:00 PM  | 12.0 | 11.8 | 11.9 | 11.9 |
| 2022-06-13 9:00 PM  | 12.2 | 12.0 | 12.0 | 12.1 |
| 2022-06-13 10:00 PM | 12.1 | 11.9 | 12.0 | 12.0 |
| 2022-06-13 11:00 PM | 11.8 | 11.7 | 11.8 | 11.8 |
| 2022-06-14 12:00 AM | 11.8 | 11.7 | 11.8 | 11.8 |
| 2022-06-14 1:00 AM  | 11.8 | 11.7 | 11.8 | 11.8 |
| 2022-06-14 2:00 AM  | 11.8 | 11.7 | 11.8 | 11.8 |
| 2022-06-14 3:00 AM  | 11.8 | 11.6 | 11.7 | 11.7 |
| 2022-06-14 4:00 AM  | 11.7 | 11.6 | 11.7 | 11.7 |
| 2022-06-14 5:00 AM  | 11.7 | 11.5 | 11.6 | 11.6 |
| 2022-06-14 6:00 AM  | 11.7 | 11.5 | 11.6 | 11.6 |
| 2022-06-14 7:00 AM  | 11.8 | 11.5 | 11.6 | 11.6 |
| 2022-06-14 8:00 AM  | 11.9 | 11.6 | 11.7 | 11.7 |
| 2022-06-14 9:00 AM  | 11.8 | 11.6 | 11.6 | 11.7 |
| 2022-06-14 10:00 AM | 11.9 | 11.7 | 11.7 | 11.8 |
| 2022-06-14 11:00 AM | 12.0 | 11.8 | 11.8 | 11.9 |
| 2022-06-14 12:00 PM | 11.9 | 11.6 | 11.7 | 11.7 |
| 2022-06-14 1:00 PM  | 12.0 | 11.8 | 11.8 | 11.9 |
| 2022-06-14 2:00 PM  | 12.2 | 11.9 | 11.9 | 12.0 |
| 2022-06-14 3:00 PM  | 12.5 | 12.3 | 12.1 | 12.3 |
| 2022-06-14 4:00 PM  | 13.0 | 12.8 | 12.5 | 12.8 |
| 2022-06-14 5:00 PM  | 13.2 | 13.1 | 12.7 | 13.0 |
| 2022-06-14 6:00 PM  | 13.2 | 13.1 | 12.8 | 13.0 |
| 2022-06-14 7:00 PM  | 13.3 | 13.2 | 12.9 | 13.1 |
| 2022-06-14 8:00 PM  | 13.2 | 13.0 | 12.8 | 13.0 |
| 2022-06-14 9:00 PM  | 12.8 | 12.6 | 12.4 | 12.6 |
| 2022-06-14 10:00 PM | 12.6 | 12.4 | 12.3 | 12.4 |
| 2022-06-14 11:00 PM | 12.6 | 12.4 | 12.4 | 12.5 |
| 2022-06-15 12:00 AM | 12.7 | 12.5 | 12.5 | 12.6 |
| 2022-06-15 1:00 AM  | 12.8 | 12.6 | 12.6 | 12.7 |
| 2022-06-15 2:00 AM  | 12.7 | 12.6 | 12.5 | 12.6 |
| 2022-06-15 3:00 AM  | 12.5 | 12.4 | 12.4 | 12.4 |

|                     |      |      |      |      |
|---------------------|------|------|------|------|
| 2022-06-15 4:00 AM  | 12.5 | 12.4 | 12.4 | 12.4 |
| 2022-06-15 5:00 AM  | 12.4 | 12.4 | 12.4 | 12.4 |
| 2022-06-15 6:00 AM  | 12.4 | 12.3 | 12.3 | 12.3 |
| 2022-06-15 7:00 AM  | 12.4 | 12.3 | 12.3 | 12.3 |
| 2022-06-15 8:00 AM  | 12.5 | 12.5 | 12.4 | 12.5 |
| 2022-06-15 9:00 AM  | 13.1 | 13.0 | 12.7 | 12.9 |
| 2022-06-15 10:00 AM | 14.1 | 14.3 | 13.4 | 13.9 |
| 2022-06-15 11:00 AM | 16.9 | 17.6 | 14.6 | 16.4 |
| 2022-06-15 12:00 PM | 17.9 | 19.0 | 15.9 | 17.6 |
| 2022-06-15 1:00 PM  | 18.9 | 20.1 | 16.7 | 18.6 |
| 2022-06-15 2:00 PM  | 17.1 | 17.5 | 16.1 | 16.9 |
| 2022-06-15 3:00 PM  | 17.6 | 18.2 | 18.5 | 18.1 |
| 2022-06-15 4:00 PM  | 16.9 | 17.5 | 19.4 | 17.9 |
| 2022-06-15 5:00 PM  | 17.4 | 18.1 | 18.9 | 18.1 |
| 2022-06-15 6:00 PM  | 17.2 | 17.5 | 17.1 | 17.3 |
| 2022-06-15 7:00 PM  | 16.7 | 16.9 | 16.4 | 16.7 |
| 2022-06-15 8:00 PM  | 16.1 | 16.0 | 15.8 | 16.0 |
| 2022-06-15 9:00 PM  | 15.7 | 15.5 | 15.4 | 15.5 |
| 2022-06-15 10:00 PM | 14.4 | 13.9 | 14.1 | 14.1 |
| 2022-06-15 11:00 PM | 13.7 | 13.2 | 13.5 | 13.5 |
| 2022-06-16 12:00 AM | 13.4 | 12.8 | 13.3 | 13.2 |
| 2022-06-16 1:00 AM  | 13.4 | 13.0 | 13.2 | 13.2 |
| 2022-06-16 2:00 AM  | 13.4 | 13.1 | 13.2 | 13.2 |
| 2022-06-16 3:00 AM  | 13.1 | 12.7 | 13.0 | 12.9 |
| 2022-06-16 4:00 AM  | 12.6 | 12.2 | 12.5 | 12.4 |
| 2022-06-16 5:00 AM  | 12.2 | 11.7 | 12.2 | 12.0 |
| 2022-06-16 6:00 AM  | 11.9 | 11.4 | 11.9 | 11.7 |
| 2022-06-16 7:00 AM  | 11.8 | 11.3 | 11.8 | 11.6 |
| 2022-06-16 8:00 AM  | 12.0 | 11.5 | 12.0 | 11.8 |
| 2022-06-16 9:00 AM  | 12.4 | 12.1 | 12.2 | 12.2 |
| 2022-06-16 10:00 AM | 13.2 | 13.2 | 12.9 | 13.1 |
| 2022-06-16 11:00 AM | 14.8 | 15.2 | 13.7 | 14.6 |
| 2022-06-16 12:00 PM | 19.9 | 22.3 | 15.2 | 19.1 |
| 2022-06-16 1:00 PM  | 19.4 | 19.4 | 16.2 | 18.3 |
| 2022-06-16 2:00 PM  | 18.5 | 18.3 | 16.5 | 17.8 |
| 2022-06-16 3:00 PM  | 17.8 | 18.4 | 16.8 | 17.7 |
| 2022-06-16 4:00 PM  | 17.6 | 18.2 | 18.2 | 18.0 |
| 2022-06-16 5:00 PM  | 17.7 | 18.5 | 18.4 | 18.2 |
| 2022-06-16 6:00 PM  | 17.5 | 18.4 | 18.5 | 18.1 |
| 2022-06-16 7:00 PM  | 17.4 | 18.1 | 17.1 | 17.5 |
| 2022-06-16 8:00 PM  | 16.8 | 17.2 | 16.5 | 16.8 |
| 2022-06-16 9:00 PM  | 16.4 | 16.8 | 16.2 | 16.5 |
| 2022-06-16 10:00 PM | 15.9 | 16.1 | 15.8 | 15.9 |
| 2022-06-16 11:00 PM | 15.5 | 15.7 | 15.4 | 15.5 |
| 2022-06-17 12:00 AM | 15.2 | 15.3 | 15.2 | 15.2 |

|                     |      |      |      |      |
|---------------------|------|------|------|------|
| 2022-06-17 1:00 AM  | 15.1 | 15.1 | 15.1 | 15.1 |
| 2022-06-17 2:00 AM  | 14.7 | 14.7 | 14.8 | 14.7 |
| 2022-06-17 3:00 AM  | 14.3 | 14.2 | 14.5 | 14.3 |
| 2022-06-17 4:00 AM  | 14.1 | 14.0 | 14.3 | 14.1 |
| 2022-06-17 5:00 AM  | 14.1 | 14.1 | 14.3 | 14.2 |
| 2022-06-17 6:00 AM  | 14.0 | 14.0 | 14.2 | 14.1 |
| 2022-06-17 7:00 AM  | 14.2 | 14.3 | 14.3 | 14.3 |
| 2022-06-17 8:00 AM  | 14.4 | 14.8 | 14.4 | 14.5 |
| 2022-06-17 9:00 AM  | 14.5 | 14.9 | 14.4 | 14.6 |
| 2022-06-17 10:00 AM | 15.7 | 17.9 | 14.6 | 16.1 |
| 2022-06-17 11:00 AM | 20.0 | 24.1 | 14.7 | 19.6 |
| 2022-06-17 12:00 PM | 22.0 | 24.8 | 15.4 | 20.7 |
| 2022-06-17 1:00 PM  | 23.4 | 21.5 | 16.1 | 20.3 |
| 2022-06-17 2:00 PM  | 20.9 | 20.2 | 17.3 | 19.5 |
| 2022-06-17 3:00 PM  | 18.8 | 20.2 | 21.2 | 20.1 |
| 2022-06-17 4:00 PM  | 18.5 | 20.1 | 24.3 | 21.0 |
| 2022-06-17 5:00 PM  | 18.3 | 20.5 | 26.0 | 21.6 |
| 2022-06-17 6:00 PM  | 17.8 | 19.3 | 21.2 | 19.4 |
| 2022-06-17 7:00 PM  | 16.9 | 17.5 | 17.3 | 17.2 |
| 2022-06-17 8:00 PM  | 16.5 | 17.1 | 16.6 | 16.7 |
| 2022-06-17 9:00 PM  | 16.0 | 16.2 | 16.3 | 16.2 |
| 2022-06-17 10:00 PM | 15.0 | 14.8 | 15.4 | 15.1 |
| 2022-06-17 11:00 PM | 14.0 | 13.3 | 14.5 | 13.9 |
| 2022-06-18 12:00 AM | 13.4 | 12.7 | 14.0 | 13.4 |
| 2022-06-18 1:00 AM  | 12.7 | 11.8 | 13.1 | 12.5 |
| 2022-06-18 2:00 AM  | 12.2 | 11.4 | 12.7 | 12.1 |
| 2022-06-18 3:00 AM  | 11.8 | 10.9 | 12.3 | 11.7 |
| 2022-06-18 4:00 AM  | 11.2 | 9.9  | 11.9 | 11.0 |
| 2022-06-18 5:00 AM  | 10.6 | 9.2  | 11.1 | 10.3 |
| 2022-06-18 6:00 AM  | 9.9  | 8.4  | 10.3 | 9.5  |
| 2022-06-18 7:00 AM  | 9.7  | 8.1  | 10.4 | 9.4  |
| 2022-06-18 8:00 AM  | 10.3 | 9.2  | 10.8 | 10.1 |
| 2022-06-18 9:00 AM  | 11.7 | 11.3 | 11.8 | 11.6 |
| 2022-06-18 10:00 AM | 14.3 | 16.0 | 12.7 | 14.3 |
| 2022-06-18 11:00 AM | 19.2 | 22.3 | 13.7 | 18.4 |
| 2022-06-18 12:00 PM | 20.6 | 22.1 | 14.4 | 19.0 |
| 2022-06-18 1:00 PM  | 21.4 | 19.8 | 15.2 | 18.8 |
| 2022-06-18 2:00 PM  | 20.2 | 18.9 | 16.8 | 18.6 |
| 2022-06-18 3:00 PM  | 18.0 | 18.3 | 19.9 | 18.7 |
| 2022-06-18 4:00 PM  | 17.2 | 17.4 | 23.1 | 19.2 |
| 2022-06-18 5:00 PM  | 16.6 | 17.0 | 23.8 | 19.1 |
| 2022-06-18 6:00 PM  | 16.1 | 16.2 | 19.7 | 17.3 |
| 2022-06-18 7:00 PM  | 15.3 | 14.8 | 16.0 | 15.4 |
| 2022-06-18 8:00 PM  | 15.2 | 14.6 | 15.4 | 15.1 |
| 2022-06-18 9:00 PM  | 14.6 | 13.8 | 14.7 | 14.4 |

|                     |      |      |      |      |
|---------------------|------|------|------|------|
| 2022-06-18 10:00 PM | 13.7 | 12.6 | 14.0 | 13.4 |
| 2022-06-18 11:00 PM | 13.0 | 11.7 | 13.4 | 12.7 |
| 2022-06-19 12:00 AM | 12.4 | 10.9 | 12.8 | 12.0 |
| 2022-06-19 1:00 AM  | 12.2 | 10.9 | 12.5 | 11.9 |
| 2022-06-19 2:00 AM  | 12.1 | 10.8 | 12.4 | 11.8 |
| 2022-06-19 3:00 AM  | 12.4 | 11.6 | 12.6 | 12.2 |
| 2022-06-19 4:00 AM  | 12.1 | 11.1 | 12.3 | 11.8 |
| 2022-06-19 5:00 AM  | 11.8 | 10.9 | 12.2 | 11.6 |
| 2022-06-19 6:00 AM  | 11.8 | 11.1 | 12.0 | 11.6 |
| 2022-06-19 7:00 AM  | 11.5 | 10.8 | 11.7 | 11.3 |
| 2022-06-19 8:00 AM  | 11.7 | 11.1 | 11.6 | 11.5 |
| 2022-06-19 9:00 AM  | 11.7 | 11.2 | 11.7 | 11.5 |
| 2022-06-19 10:00 AM | 10.3 | 9.6  | 10.6 | 10.2 |
| 2022-06-19 11:00 AM | 9.8  | 9.7  | 10.4 | 10.0 |
| 2022-06-19 12:00 PM | 10.4 | 10.3 | 10.8 | 10.5 |
| 2022-06-19 1:00 PM  | 11.9 | 12.2 | 11.9 | 12.0 |
| 2022-06-19 2:00 PM  | 13.5 | 14.1 | 13.1 | 13.6 |
| 2022-06-19 3:00 PM  | 14.0 | 14.8 | 15.4 | 14.7 |
| 2022-06-19 4:00 PM  | 13.9 | 14.4 | 15.1 | 14.5 |
| 2022-06-19 5:00 PM  | 14.3 | 15.1 | 17.2 | 15.5 |
| 2022-06-19 6:00 PM  | 14.3 | 14.7 | 14.6 | 14.5 |
| 2022-06-19 7:00 PM  | 14.2 | 14.3 | 14.0 | 14.2 |
| 2022-06-19 8:00 PM  | 13.8 | 13.7 | 13.5 | 13.7 |
| 2022-06-19 9:00 PM  | 13.0 | 12.6 | 12.9 | 12.8 |
| 2022-06-19 10:00 PM | 12.1 | 11.5 | 12.1 | 11.9 |
| 2022-06-19 11:00 PM | 11.9 | 11.2 | 11.8 | 11.6 |
| 2022-06-20 12:00 AM | 11.8 | 11.2 | 11.8 | 11.6 |
| 2022-06-20 1:00 AM  | 11.9 | 11.4 | 11.9 | 11.7 |
| 2022-06-20 2:00 AM  | 11.8 | 11.3 | 11.8 | 11.6 |
| 2022-06-20 3:00 AM  | 11.8 | 11.3 | 11.7 | 11.6 |
| 2022-06-20 4:00 AM  | 11.8 | 11.4 | 11.8 | 11.7 |
| 2022-06-20 5:00 AM  | 11.5 | 11.1 | 11.6 | 11.4 |
| 2022-06-20 6:00 AM  | 11.3 | 10.8 | 11.5 | 11.2 |
| 2022-06-20 7:00 AM  | 11.6 | 11.2 | 11.7 | 11.5 |
| 2022-06-20 8:00 AM  | 12.2 | 12.1 | 12.0 | 12.1 |
| 2022-06-20 9:00 AM  | 12.3 | 12.3 | 11.9 | 12.2 |
| 2022-06-20 10:00 AM | 14.2 | 15.5 | 12.3 | 14.0 |
| 2022-06-20 11:00 AM | 19.5 | 22.0 | 12.9 | 18.1 |
| 2022-06-20 12:00 PM | 21.9 | 23.9 | 13.9 | 19.9 |
| 2022-06-20 1:00 PM  | 23.0 | 21.1 | 15.1 | 19.7 |
| 2022-06-20 2:00 PM  | 21.2 | 20.2 | 17.0 | 19.5 |
| 2022-06-20 3:00 PM  | 19.0 | 19.9 | 20.5 | 19.8 |
| 2022-06-20 4:00 PM  | 18.4 | 19.3 | 23.9 | 20.5 |
| 2022-06-20 5:00 PM  | 18.0 | 19.2 | 25.3 | 20.8 |
| 2022-06-20 6:00 PM  | 18.1 | 19.1 | 21.5 | 19.6 |

|                     |      |      |      |      |
|---------------------|------|------|------|------|
| 2022-06-20 7:00 PM  | 17.8 | 18.2 | 18.0 | 18.0 |
| 2022-06-20 8:00 PM  | 17.5 | 17.8 | 17.4 | 17.6 |
| 2022-06-20 9:00 PM  | 17.5 | 17.8 | 17.1 | 17.5 |
| 2022-06-20 10:00 PM | 17.2 | 17.4 | 16.8 | 17.1 |
| 2022-06-20 11:00 PM | 16.6 | 16.5 | 16.4 | 16.5 |
| 2022-06-21 12:00 AM | 16.2 | 16.1 | 16.0 | 16.1 |
| 2022-06-21 1:00 AM  | 16.0 | 15.9 | 15.8 | 15.9 |
| 2022-06-21 2:00 AM  | 16.0 | 15.9 | 15.8 | 15.9 |
| 2022-06-21 3:00 AM  | 17.4 | 18.0 | 16.9 | 17.4 |
| 2022-06-21 4:00 AM  | 17.2 | 17.7 | 16.8 | 17.2 |
| 2022-06-21 5:00 AM  | 17.0 | 17.4 | 16.6 | 17.0 |
| 2022-06-21 6:00 AM  | 16.9 | 17.3 | 16.5 | 16.9 |
| 2022-06-21 7:00 AM  | 17.1 | 17.5 | 16.6 | 17.1 |
| 2022-06-21 8:00 AM  | 17.1 | 17.3 | 16.6 | 17.0 |
| 2022-06-21 9:00 AM  | 16.8 | 16.9 | 16.2 | 16.6 |
| 2022-06-21 10:00 AM | 18.3 | 19.0 | 16.6 | 18.0 |
| 2022-06-21 11:00 AM | 19.3 | 20.0 | 17.2 | 18.8 |
| 2022-06-21 12:00 PM | 22.9 | 24.4 | 18.4 | 21.9 |
| 2022-06-21 1:00 PM  | 25.1 | 25.3 | 20.1 | 23.5 |
| 2022-06-21 2:00 PM  | 24.5 | 24.8 | 21.3 | 23.5 |
| 2022-06-21 3:00 PM  | 23.8 | 25.2 | 23.2 | 24.1 |
| 2022-06-21 4:00 PM  | 23.5 | 25.3 | 27.5 | 25.4 |
| 2022-06-21 5:00 PM  | 22.9 | 24.2 | 28.3 | 25.1 |
| 2022-06-21 6:00 PM  | 22.0 | 22.9 | 24.8 | 23.2 |
| 2022-06-21 7:00 PM  | 20.5 | 20.6 | 21.1 | 20.7 |
| 2022-06-21 8:00 PM  | 19.9 | 20.1 | 20.3 | 20.1 |
| 2022-06-21 9:00 PM  | 19.5 | 19.8 | 19.8 | 19.7 |
| 2022-06-21 10:00 PM | 19.2 | 19.3 | 19.3 | 19.3 |
| 2022-06-21 11:00 PM | 18.7 | 18.7 | 18.9 | 18.8 |
| 2022-06-22 12:00 AM | 18.3 | 18.2 | 18.5 | 18.3 |
| 2022-06-22 1:00 AM  | 17.9 | 17.8 | 18.1 | 17.9 |
| 2022-06-22 2:00 AM  | 17.6 | 17.4 | 17.7 | 17.6 |
| 2022-06-22 3:00 AM  | 17.4 | 17.3 | 17.6 | 17.4 |
| 2022-06-22 4:00 AM  | 16.9 | 16.9 | 17.0 | 16.9 |
| 2022-06-22 5:00 AM  | 16.1 | 15.8 | 16.4 | 16.1 |
| 2022-06-22 6:00 AM  | 15.7 | 15.3 | 16.1 | 15.7 |
| 2022-06-22 7:00 AM  | 15.6 | 15.2 | 15.9 | 15.6 |
| 2022-06-22 8:00 AM  | 15.9 | 15.7 | 15.9 | 15.8 |
| 2022-06-22 9:00 AM  | 15.4 | 15.3 | 15.4 | 15.4 |
| 2022-06-22 10:00 AM | 16.4 | 17.5 | 15.3 | 16.4 |
| 2022-06-22 11:00 AM | 21.2 | 23.9 | 15.8 | 20.3 |
| 2022-06-22 12:00 PM | 23.6 | 25.6 | 16.6 | 21.9 |
| 2022-06-22 1:00 PM  | 24.5 | 23.0 | 17.3 | 21.6 |
| 2022-06-22 2:00 PM  | 23.3 | 22.2 | 18.8 | 21.4 |
| 2022-06-22 3:00 PM  | 21.2 | 21.9 | 20.5 | 21.2 |

|                     |      |      |      |      |
|---------------------|------|------|------|------|
| 2022-06-22 4:00 PM  | 21.2 | 22.0 | 22.0 | 21.7 |
| 2022-06-23 11:00 AM | 22.1 | 24.6 | 15.7 | 20.8 |
| 2022-06-23 12:00 PM | 25.1 | 26.4 | 16.6 | 22.7 |
| 2022-06-23 1:00 PM  | 25.9 | 23.6 | 17.5 | 22.3 |
| 2022-06-23 2:00 PM  | 23.8 | 22.4 | 18.9 | 21.7 |
| 2022-06-23 3:00 PM  | 22.0 | 22.7 | 21.3 | 22.0 |
| 2022-06-23 4:00 PM  | 21.9 | 22.9 | 23.7 | 22.8 |
| 2022-06-23 5:00 PM  | 22.1 | 23.7 | 25.8 | 23.9 |
| 2022-06-23 6:00 PM  | 21.6 | 22.4 | 23.2 | 22.4 |
| 2022-06-23 7:00 PM  | 20.7 | 20.6 | 20.7 | 20.7 |
| 2022-06-23 8:00 PM  | 20.8 | 20.9 | 20.3 | 20.7 |
| 2022-06-23 9:00 PM  | 20.0 | 19.9 | 19.7 | 19.9 |
| 2022-06-23 10:00 PM | 19.4 | 19.2 | 19.2 | 19.3 |
| 2022-06-23 11:00 PM | 18.8 | 18.5 | 18.8 | 18.7 |
| 2022-06-24 12:00 AM | 18.2 | 17.7 | 18.2 | 18.0 |
| 2022-06-24 1:00 AM  | 17.2 | 16.4 | 17.3 | 17.0 |
| 2022-06-24 2:00 AM  | 16.9 | 16.1 | 17.0 | 16.7 |
| 2022-06-24 3:00 AM  | 16.5 | 15.8 | 16.8 | 16.4 |
| 2022-06-24 4:00 AM  | 15.4 | 14.3 | 15.9 | 15.2 |
| 2022-06-24 5:00 AM  | 14.9 | 13.8 | 15.5 | 14.7 |
| 2022-06-24 6:00 AM  | 14.7 | 13.5 | 15.3 | 14.5 |
| 2022-06-24 7:00 AM  | 14.7 | 13.8 | 15.3 | 14.6 |
| 2022-06-24 8:00 AM  | 15.3 | 14.8 | 15.6 | 15.2 |
| 2022-06-24 9:00 AM  | 16.5 | 16.4 | 16.2 | 16.4 |
| 2022-06-24 10:00 AM | 18.1 | 18.6 | 16.4 | 17.7 |
| 2022-06-24 11:00 AM | 22.6 | 23.5 | 16.7 | 20.9 |
| 2022-06-24 12:00 PM | 24.6 | 25.1 | 17.5 | 22.4 |
| 2022-06-24 1:00 PM  | 26.2 | 24.2 | 18.6 | 23.0 |
| 2022-06-24 2:00 PM  | 24.7 | 23.3 | 20.1 | 22.7 |
| 2022-06-24 3:00 PM  | 22.6 | 22.9 | 21.8 | 22.4 |
| 2022-06-24 4:00 PM  | 21.8 | 22.2 | 23.7 | 22.6 |
| 2022-06-24 5:00 PM  | 21.0 | 21.7 | 25.0 | 22.6 |
| 2022-06-24 6:00 PM  | 20.5 | 21.0 | 22.4 | 21.3 |
| 2022-06-24 7:00 PM  | 19.6 | 19.3 | 19.7 | 19.5 |
| 2022-06-24 8:00 PM  | 19.2 | 18.8 | 19.1 | 19.0 |
| 2022-06-24 9:00 PM  | 18.8 | 18.5 | 18.7 | 18.7 |
| 2022-06-24 10:00 PM | 18.2 | 17.7 | 18.2 | 18.0 |
| 2022-06-24 11:00 PM | 17.6 | 17.0 | 17.8 | 17.5 |
| 2022-06-25 12:00 AM | 17.1 | 16.5 | 17.3 | 17.0 |
| 2022-06-25 1:00 AM  | 16.7 | 16.0 | 17.0 | 16.6 |
| 2022-06-25 2:00 AM  | 16.5 | 15.9 | 16.8 | 16.4 |
| 2022-06-25 3:00 AM  | 16.5 | 16.1 | 16.8 | 16.5 |
| 2022-06-25 4:00 AM  | 16.5 | 16.2 | 16.7 | 16.5 |
| 2022-06-25 5:00 AM  | 16.1 | 15.7 | 16.4 | 16.1 |
| 2022-06-25 6:00 AM  | 15.8 | 15.4 | 16.1 | 15.8 |

|                     |      |      |      |      |
|---------------------|------|------|------|------|
| 2022-06-25 7:00 AM  | 15.7 | 15.2 | 15.9 | 15.6 |
| 2022-06-25 8:00 AM  | 15.7 | 15.3 | 15.8 | 15.6 |
| 2022-06-25 9:00 AM  | 16.2 | 15.9 | 15.8 | 16.0 |
| 2022-06-25 10:00 AM | 16.4 | 16.2 | 16.1 | 16.2 |
| 2022-06-25 11:00 AM | 16.6 | 16.6 | 16.3 | 16.5 |
| 2022-06-25 12:00 PM | 16.5 | 16.3 | 16.1 | 16.3 |
| 2022-06-25 1:00 PM  | 16.6 | 16.5 | 16.2 | 16.4 |
| 2022-06-25 2:00 PM  | 17.5 | 17.4 | 16.6 | 17.2 |
| 2022-06-25 3:00 PM  | 18.7 | 19.1 | 18.3 | 18.7 |
| 2022-06-25 4:00 PM  | 18.9 | 19.4 | 20.1 | 19.5 |
| 2022-06-25 5:00 PM  | 18.2 | 18.3 | 18.6 | 18.4 |
| 2022-06-25 6:00 PM  | 17.9 | 17.9 | 17.8 | 17.9 |
| 2022-06-25 7:00 PM  | 17.6 | 17.5 | 17.4 | 17.5 |
| 2022-06-25 8:00 PM  | 17.5 | 17.2 | 17.1 | 17.3 |
| 2022-06-25 9:00 PM  | 17.1 | 16.9 | 16.9 | 17.0 |
| 2022-06-25 10:00 PM | 16.4 | 15.9 | 16.5 | 16.3 |
| 2022-06-25 11:00 PM | 15.8 | 15.1 | 16.0 | 15.6 |
| 2022-06-26 12:00 AM | 15.3 | 14.5 | 15.7 | 15.2 |
| 2022-06-26 1:00 AM  | 15.1 | 14.4 | 15.5 | 15.0 |
| 2022-06-26 2:00 AM  | 15.0 | 14.3 | 15.3 | 14.9 |
| 2022-06-26 3:00 AM  | 15.1 | 14.6 | 15.5 | 15.1 |
| 2022-06-26 4:00 AM  | 14.6 | 14.1 | 15.2 | 14.6 |
| 2022-06-26 5:00 AM  | 14.2 | 13.4 | 14.8 | 14.1 |
| 2022-06-26 6:00 AM  | 13.6 | 12.6 | 14.3 | 13.5 |
| 2022-06-26 7:00 AM  | 13.3 | 12.4 | 14.1 | 13.3 |
| 2022-06-26 8:00 AM  | 13.6 | 12.8 | 14.2 | 13.5 |
| 2022-06-26 9:00 AM  | 14.4 | 14.1 | 14.6 | 14.4 |
| 2022-06-26 10:00 AM | 15.5 | 15.8 | 14.7 | 15.3 |
| 2022-06-26 11:00 AM | 18.0 | 18.4 | 15.3 | 17.2 |
| 2022-06-26 12:00 PM | 18.8 | 18.6 | 15.6 | 17.7 |
| 2022-06-26 1:00 PM  | 18.7 | 18.2 | 16.1 | 17.7 |
| 2022-06-26 2:00 PM  | 18.1 | 17.7 | 16.2 | 17.3 |
| 2022-06-26 3:00 PM  | 17.6 | 17.4 | 16.3 | 17.1 |
| 2022-06-26 4:00 PM  | 16.7 | 16.6 | 17.2 | 16.8 |
| 2022-06-26 5:00 PM  | 16.5 | 17.0 | 17.9 | 17.1 |
| 2022-06-26 6:00 PM  | 15.9 | 16.1 | 16.3 | 16.1 |
| 2022-06-26 7:00 PM  | 15.2 | 15.0 | 15.0 | 15.1 |
| 2022-06-26 8:00 PM  | 15.0 | 14.7 | 14.7 | 14.8 |
| 2022-06-26 9:00 PM  | 14.5 | 14.1 | 14.4 | 14.3 |
| 2022-06-26 10:00 PM | 14.0 | 13.5 | 14.1 | 13.9 |
| 2022-06-26 11:00 PM | 13.4 | 12.9 | 13.8 | 13.4 |
| 2022-06-27 12:00 AM | 13.2 | 12.6 | 13.6 | 13.1 |
| 2022-06-27 1:00 AM  | 13.0 | 12.4 | 13.4 | 12.9 |
| 2022-06-27 2:00 AM  | 13.0 | 12.4 | 13.4 | 12.9 |
| 2022-06-27 3:00 AM  | 12.7 | 12.2 | 13.3 | 12.7 |



|                     |      |      |      |      |
|---------------------|------|------|------|------|
| 2022-06-27 4:00 AM  | 12.4 | 11.9 | 13.1 | 12.5 |
| 2022-06-27 5:00 AM  | 12.3 | 11.7 | 13.0 | 12.3 |
| 2022-06-27 6:00 AM  | 11.9 | 11.0 | 12.5 | 11.8 |
| 2022-06-27 7:00 AM  | 11.2 | 9.9  | 12.0 | 11.0 |
| 2022-06-27 8:00 AM  | 11.4 | 10.4 | 12.1 | 11.3 |
| 2022-06-27 9:00 AM  | 12.0 | 11.4 | 12.5 | 12.0 |
| 2022-06-27 10:00 AM | 13.9 | 14.2 | 13.0 | 13.7 |
| 2022-06-27 11:00 AM | 19.9 | 20.3 | 13.9 | 18.0 |
| 2022-06-27 12:00 PM | 22.7 | 22.5 | 14.8 | 20.0 |
| 2022-06-27 1:00 PM  | 23.2 | 21.0 | 16.1 | 20.1 |
| 2022-06-27 2:00 PM  | 20.9 | 19.3 | 17.1 | 19.1 |
| 2022-06-27 3:00 PM  | 19.5 | 19.3 | 17.6 | 18.8 |
| 2022-06-27 4:00 PM  | 19.0 | 19.0 | 18.8 | 18.9 |
| 2022-06-27 5:00 PM  | 18.8 | 19.7 | 20.9 | 19.8 |
| 2022-06-27 6:00 PM  | 18.7 | 19.6 | 20.4 | 19.6 |
| 2022-06-27 7:00 PM  | 18.0 | 17.8 | 17.9 | 17.9 |
| 2022-06-27 8:00 PM  | 17.6 | 17.3 | 17.4 | 17.4 |
| 2022-06-27 9:00 PM  | 17.0 | 16.7 | 17.0 | 16.9 |
| 2022-06-27 10:00 PM | 16.3 | 15.7 | 16.4 | 16.1 |
| 2022-06-27 11:00 PM | 15.2 | 14.3 | 15.5 | 15.0 |
| 2022-06-28 12:00 AM | 14.6 | 13.5 | 15.0 | 14.4 |
| 2022-06-28 1:00 AM  | 14.4 | 13.4 | 14.9 | 14.2 |
| 2022-06-28 2:00 AM  | 15.2 | 14.8 | 15.4 | 15.1 |
| 2022-06-28 3:00 AM  | 15.3 | 15.0 | 15.5 | 15.3 |
| 2022-06-28 4:00 AM  | 15.5 | 15.3 | 15.6 | 15.5 |
| 2022-06-28 5:00 AM  | 15.3 | 15.1 | 15.5 | 15.3 |
| 2022-06-28 6:00 AM  | 15.1 | 14.8 | 15.3 | 15.1 |
| 2022-06-28 7:00 AM  | 15.0 | 14.7 | 15.3 | 15.0 |
| 2022-06-28 8:00 AM  | 15.2 | 15.1 | 15.4 | 15.2 |
| 2022-06-28 9:00 AM  | 15.3 | 15.2 | 15.3 | 15.3 |
| 2022-06-28 10:00 AM | 16.5 | 16.8 | 15.6 | 16.3 |
| 2022-06-28 11:00 AM | 18.1 | 18.7 | 16.0 | 17.6 |
| 2022-06-28 12:00 PM | 17.2 | 17.3 | 15.9 | 16.8 |
| 2022-06-28 1:00 PM  | 16.6 | 16.6 | 15.6 | 16.3 |
| 2022-06-28 2:00 PM  | 16.3 | 16.1 | 15.4 | 15.9 |
| 2022-06-28 3:00 PM  | 17.4 | 17.6 | 16.1 | 17.0 |
| 2022-06-28 4:00 PM  | 17.8 | 18.4 | 18.1 | 18.1 |
| 2022-06-28 5:00 PM  | 17.5 | 18.7 | 19.4 | 18.5 |
| 2022-06-28 6:00 PM  | 17.1 | 18.1 | 18.2 | 17.8 |
| 2022-06-28 7:00 PM  | 16.2 | 16.4 | 16.3 | 16.3 |
| 2022-06-28 8:00 PM  | 16.0 | 16.0 | 15.9 | 16.0 |
| 2022-06-28 9:00 PM  | 15.5 | 15.5 | 15.5 | 15.5 |
| 2022-06-28 10:00 PM | 15.0 | 14.7 | 15.3 | 15.0 |
| 2022-06-28 11:00 PM | 14.1 | 13.2 | 14.7 | 14.0 |
| 2022-06-29 12:00 AM | 13.4 | 12.4 | 14.0 | 13.3 |

|                     |      |      |      |      |
|---------------------|------|------|------|------|
| 2022-06-29 1:00 AM  | 12.7 | 11.7 | 13.6 | 12.7 |
| 2022-06-29 2:00 AM  | 12.0 | 10.8 | 12.9 | 11.9 |
| 2022-06-29 3:00 AM  | 11.5 | 10.3 | 12.5 | 11.4 |
| 2022-06-29 4:00 AM  | 11.3 | 10.0 | 12.3 | 11.2 |
| 2022-06-29 5:00 AM  | 10.9 | 9.6  | 11.7 | 10.7 |
| 2022-06-29 6:00 AM  | 10.5 | 9.1  | 11.3 | 10.3 |
| 2022-06-29 7:00 AM  | 9.9  | 8.6  | 11.0 | 9.8  |
| 2022-06-29 8:00 AM  | 10.2 | 9.3  | 11.3 | 10.3 |
| 2022-06-29 9:00 AM  | 11.5 | 11.0 | 12.1 | 11.5 |
| 2022-06-29 10:00 AM | 13.7 | 14.2 | 12.9 | 13.6 |
| 2022-06-29 11:00 AM | 19.8 | 20.8 | 13.9 | 18.2 |
| 2022-06-29 12:00 PM | 21.9 | 22.1 | 14.9 | 19.6 |
| 2022-06-29 1:00 PM  | 20.5 | 19.4 | 15.6 | 18.5 |
| 2022-06-29 2:00 PM  | 20.1 | 19.1 | 16.6 | 18.6 |
| 2022-06-29 3:00 PM  | 18.3 | 18.1 | 16.8 | 17.7 |
| 2022-06-29 4:00 PM  | 18.1 | 17.8 | 16.6 | 17.5 |
| 2022-06-29 5:00 PM  | 17.5 | 16.9 | 16.0 | 16.8 |
| 2022-06-29 6:00 PM  | 17.0 | 16.5 | 15.6 | 16.4 |
| 2022-06-29 7:00 PM  | 16.5 | 15.8 | 15.3 | 15.9 |
| 2022-06-29 8:00 PM  | 15.8 | 15.0 | 14.9 | 15.2 |
| 2022-06-29 9:00 PM  | 15.2 | 14.4 | 14.6 | 14.7 |
| 2022-06-29 10:00 PM | 14.6 | 13.6 | 14.2 | 14.1 |
| 2022-06-29 11:00 PM | 14.1 | 13.2 | 14.0 | 13.8 |
| 2022-06-30 12:00 AM | 13.8 | 13.1 | 13.9 | 13.6 |
| 2022-06-30 1:00 AM  | 13.5 | 12.9 | 13.6 | 13.3 |
| 2022-06-30 2:00 AM  | 13.2 | 12.5 | 13.2 | 13.0 |
| 2022-06-30 3:00 AM  | 13.2 | 12.7 | 13.2 | 13.0 |
| 2022-06-30 4:00 AM  | 13.2 | 12.7 | 13.2 | 13.0 |
| 2022-06-30 5:00 AM  | 13.3 | 12.9 | 13.3 | 13.2 |
| 2022-06-30 6:00 AM  | 13.3 | 13.0 | 13.3 | 13.2 |
| 2022-06-30 7:00 AM  | 13.4 | 13.1 | 13.4 | 13.3 |
| 2022-06-30 8:00 AM  | 13.7 | 13.4 | 13.5 | 13.5 |
| 2022-06-30 9:00 AM  | 13.9 | 13.7 | 13.7 | 13.8 |
| 2022-06-30 10:00 AM | 14.1 | 14.0 | 13.9 | 14.0 |
| 2022-06-30 11:00 AM | 15.2 | 15.3 | 14.1 | 14.9 |
| 2022-06-30 12:00 PM | 19.2 | 19.5 | 15.7 | 18.1 |
| 2022-06-30 1:00 PM  | 20.6 | 20.1 | 16.5 | 19.1 |
| 2022-06-30 2:00 PM  | 20.8 | 20.1 | 17.1 | 19.3 |
| 2022-06-30 3:00 PM  | 19.6 | 20.2 | 18.2 | 19.3 |
| 2022-06-30 4:00 PM  | 19.9 | 20.9 | 20.0 | 20.3 |
| 2022-06-30 5:00 PM  | 20.5 | 22.1 | 21.7 | 21.4 |
| 2022-06-30 6:00 PM  | 20.1 | 21.3 | 20.3 | 20.6 |
| 2022-06-30 7:00 PM  | 19.4 | 20.0 | 18.9 | 19.4 |
| 2022-06-30 8:00 PM  | 19.1 | 19.6 | 18.5 | 19.1 |
| 2022-06-30 9:00 PM  | 18.5 | 18.7 | 18.1 | 18.4 |

|                     |      |      |      |      |
|---------------------|------|------|------|------|
| 2022-06-30 10:00 PM | 17.8 | 17.8 | 17.6 | 17.7 |
| 2022-06-30 11:00 PM | 16.9 | 16.7 | 17.1 | 16.9 |
| 2022-07-01 12:00 AM | 16.3 | 15.8 | 16.6 | 16.2 |
| 2022-07-01 1:00 AM  | 16.0 | 15.7 | 16.3 | 16.0 |
| 2022-07-01 2:00 AM  | 15.4 | 15.0 | 15.9 | 15.4 |
| 2022-07-01 3:00 AM  | 14.6 | 14.0 | 15.3 | 14.6 |
| 2022-07-01 4:00 AM  | 13.9 | 13.0 | 14.7 | 13.9 |
| 2022-07-01 5:00 AM  | 12.9 | 12.1 | 14.0 | 13.0 |
| 2022-07-01 6:00 AM  | 12.7 | 11.8 | 13.8 | 12.8 |
| 2022-07-01 7:00 AM  | 12.5 | 11.6 | 13.4 | 12.5 |
| 2022-07-01 8:00 AM  | 12.4 | 11.7 | 13.2 | 12.4 |
| 2022-07-01 9:00 AM  | 13.1 | 12.7 | 13.7 | 13.2 |
| 2022-07-01 10:00 AM | 15.1 | 15.1 | 14.4 | 14.9 |
| 2022-07-01 11:00 AM | 19.9 | 19.8 | 15.1 | 18.3 |
| 2022-07-01 12:00 PM | 21.3 | 21.0 | 15.9 | 19.4 |
| 2022-07-01 1:00 PM  | 18.9 | 18.5 | 16.1 | 17.8 |
| 2022-07-01 2:00 PM  | 18.3 | 18.0 | 16.3 | 17.5 |
| 2022-07-01 3:00 PM  | 17.8 | 17.6 | 16.5 | 17.3 |
| 2022-07-01 4:00 PM  | 19.1 | 19.9 | 19.4 | 19.5 |
| 2022-07-01 5:00 PM  | 18.9 | 20.2 | 20.6 | 19.9 |
| 2022-07-01 6:00 PM  | 18.2 | 19.3 | 19.0 | 18.8 |
| 2022-07-01 7:00 PM  | 17.4 | 17.7 | 17.2 | 17.4 |
| 2022-07-01 8:00 PM  | 17.0 | 17.3 | 16.8 | 17.0 |
| 2022-07-01 9:00 PM  | 16.7 | 16.8 | 16.4 | 16.6 |
| 2022-07-01 10:00 PM | 16.2 | 16.0 | 16.2 | 16.1 |
| 2022-07-01 11:00 PM | 15.5 | 15.2 | 15.8 | 15.5 |
| 2022-07-02 12:00 AM | 14.9 | 14.3 | 15.4 | 14.9 |
| 2022-07-02 1:00 AM  | 14.4 | 13.9 | 15.1 | 14.5 |
| 2022-07-02 2:00 AM  | 13.7 | 12.9 | 14.5 | 13.7 |
| 2022-07-02 3:00 AM  | 12.9 | 12.1 | 13.9 | 13.0 |
| 2022-07-02 4:00 AM  | 12.4 | 11.5 | 13.4 | 12.4 |
| 2022-07-02 5:00 AM  | 11.9 | 11.0 | 13.0 | 12.0 |
| 2022-07-02 6:00 AM  | 11.7 | 10.9 | 12.7 | 11.8 |
| 2022-07-02 7:00 AM  | 11.2 | 10.4 | 12.3 | 11.3 |
| 2022-07-02 8:00 AM  | 11.5 | 10.8 | 12.4 | 11.6 |
| 2022-07-02 9:00 AM  | 12.3 | 11.9 | 12.9 | 12.4 |
| 2022-07-02 10:00 AM | 14.1 | 14.2 | 13.4 | 13.9 |
| 2022-07-02 11:00 AM | 19.6 | 20.3 | 14.3 | 18.1 |
| 2022-07-02 12:00 PM | 21.4 | 21.7 | 15.3 | 19.5 |
| 2022-07-02 1:00 PM  | 22.0 | 20.9 | 16.1 | 19.7 |
| 2022-07-02 2:00 PM  | 20.7 | 20.0 | 16.6 | 19.1 |
| 2022-07-02 3:00 PM  | 18.8 | 18.8 | 16.6 | 18.1 |
| 2022-07-02 4:00 PM  | 18.1 | 18.0 | 16.3 | 17.5 |
| 2022-07-02 5:00 PM  | 17.9 | 17.8 | 16.5 | 17.4 |
| 2022-07-02 6:00 PM  | 17.7 | 18.3 | 17.6 | 17.9 |

|                     |      |      |      |      |
|---------------------|------|------|------|------|
| 2022-07-02 7:00 PM  | 16.8 | 16.7 | 16.3 | 16.6 |
| 2022-07-02 8:00 PM  | 16.5 | 16.3 | 16.0 | 16.3 |
| 2022-07-02 9:00 PM  | 16.0 | 15.8 | 15.8 | 15.9 |
| 2022-07-02 10:00 PM | 15.6 | 15.1 | 15.6 | 15.4 |
| 2022-07-02 11:00 PM | 15.0 | 14.3 | 15.1 | 14.8 |
| 2022-07-03 12:00 AM | 14.5 | 13.8 | 14.7 | 14.3 |
| 2022-07-03 1:00 AM  | 14.0 | 13.4 | 14.4 | 13.9 |
| 2022-07-03 2:00 AM  | 13.2 | 12.5 | 13.8 | 13.2 |
| 2022-07-03 3:00 AM  | 12.7 | 11.9 | 13.5 | 12.7 |
| 2022-07-03 4:00 AM  | 12.1 | 11.3 | 13.1 | 12.2 |
| 2022-07-03 5:00 AM  | 11.7 | 11.0 | 12.7 | 11.8 |
| 2022-07-03 6:00 AM  | 11.6 | 10.7 | 12.4 | 11.6 |
| 2022-07-03 7:00 AM  | 12.0 | 11.4 | 12.7 | 12.0 |
| 2022-07-03 8:00 AM  | 12.8 | 12.5 | 13.1 | 12.8 |
| 2022-07-03 9:00 AM  | 13.9 | 13.8 | 13.5 | 13.7 |
| 2022-07-03 10:00 AM | 15.4 | 15.5 | 14.1 | 15.0 |
| 2022-07-03 11:00 AM | 18.2 | 18.6 | 15.0 | 17.3 |
| 2022-07-03 12:00 PM | 21.1 | 21.3 | 16.0 | 19.5 |
| 2022-07-03 1:00 PM  | 22.6 | 21.5 | 17.0 | 20.4 |
| 2022-07-03 2:00 PM  | 21.7 | 21.1 | 18.0 | 20.3 |
| 2022-07-03 3:00 PM  | 20.3 | 21.1 | 20.5 | 20.6 |
| 2022-07-03 4:00 PM  | 20.0 | 21.1 | 22.2 | 21.1 |
| 2022-07-03 5:00 PM  | 19.4 | 20.1 | 20.4 | 20.0 |
| 2022-07-03 6:00 PM  | 18.5 | 18.4 | 17.9 | 18.3 |
| 2022-07-03 7:00 PM  | 18.1 | 17.9 | 17.4 | 17.8 |
| 2022-07-03 8:00 PM  | 17.8 | 17.6 | 17.2 | 17.5 |
| 2022-07-03 9:00 PM  | 17.3 | 17.0 | 16.8 | 17.0 |
| 2022-07-03 10:00 PM | 16.3 | 15.7 | 16.1 | 16.0 |
| 2022-07-03 11:00 PM | 15.9 | 15.3 | 15.8 | 15.7 |
| 2022-07-04 12:00 AM | 15.2 | 14.3 | 15.3 | 14.9 |
| 2022-07-04 1:00 AM  | 14.5 | 13.5 | 14.8 | 14.3 |
| 2022-07-04 2:00 AM  | 14.1 | 13.0 | 14.5 | 13.9 |
| 2022-07-04 3:00 AM  | 13.6 | 12.5 | 14.1 | 13.4 |
| 2022-07-04 4:00 AM  | 13.2 | 12.1 | 13.9 | 13.1 |
| 2022-07-04 5:00 AM  | 13.0 | 12.0 | 13.6 | 12.9 |
| 2022-07-04 6:00 AM  | 12.7 | 11.8 | 13.5 | 12.7 |
| 2022-07-04 7:00 AM  | 12.8 | 12.0 | 13.5 | 12.8 |
| 2022-07-04 8:00 AM  | 13.5 | 13.1 | 13.8 | 13.5 |
| 2022-07-04 9:00 AM  | 14.3 | 14.1 | 14.2 | 14.2 |
| 2022-07-04 10:00 AM | 15.1 | 14.7 | 14.4 | 14.7 |
| 2022-07-04 11:00 AM | 15.7 | 15.4 | 14.4 | 15.2 |
| 2022-07-04 12:00 PM | 15.6 | 15.2 | 14.6 | 15.1 |
| 2022-07-04 1:00 PM  | 16.8 | 16.7 | 15.2 | 16.2 |
| 2022-07-04 2:00 PM  | 16.4 | 16.2 | 15.2 | 15.9 |
| 2022-07-04 3:00 PM  | 15.9 | 15.5 | 15.0 | 15.5 |

|                     |      |      |      |      |
|---------------------|------|------|------|------|
| 2022-07-04 4:00 PM  | 15.3 | 14.8 | 14.7 | 14.9 |
| 2022-07-04 5:00 PM  | 15.5 | 15.2 | 14.9 | 15.2 |
| 2022-07-04 6:00 PM  | 15.8 | 15.5 | 15.0 | 15.4 |
| 2022-07-04 7:00 PM  | 15.6 | 15.3 | 14.9 | 15.3 |
| 2022-07-04 8:00 PM  | 15.3 | 15.0 | 14.8 | 15.0 |
| 2022-07-04 9:00 PM  | 14.8 | 14.4 | 14.5 | 14.6 |
| 2022-07-04 10:00 PM | 14.7 | 14.4 | 14.5 | 14.5 |
| 2022-07-04 11:00 PM | 14.7 | 14.4 | 14.5 | 14.5 |
| 2022-07-05 12:00 AM | 14.5 | 14.2 | 14.4 | 14.4 |
| 2022-07-05 1:00 AM  | 14.6 | 14.3 | 14.5 | 14.5 |
| 2022-07-05 2:00 AM  | 14.7 | 14.5 | 14.6 | 14.6 |
| 2022-07-05 3:00 AM  | 14.7 | 14.6 | 14.6 | 14.6 |
| 2022-07-05 4:00 AM  | 14.7 | 14.6 | 14.6 | 14.6 |
| 2022-07-05 5:00 AM  | 14.7 | 14.5 | 14.6 | 14.6 |
| 2022-07-05 6:00 AM  | 14.6 | 14.5 | 14.6 | 14.6 |
| 2022-07-05 7:00 AM  | 14.7 | 14.5 | 14.6 | 14.6 |
| 2022-07-05 8:00 AM  | 14.7 | 14.6 | 14.6 | 14.6 |
| 2022-07-05 9:00 AM  | 14.6 | 14.5 | 14.5 | 14.5 |
| 2022-07-05 10:00 AM | 14.7 | 14.6 | 14.6 | 14.6 |
| 2022-07-05 11:00 AM | 14.9 | 14.8 | 14.7 | 14.8 |
| 2022-07-05 12:00 PM | 15.1 | 15.1 | 14.8 | 15.0 |
| 2022-07-05 1:00 PM  | 15.6 | 15.6 | 15.1 | 15.4 |
| 2022-07-05 2:00 PM  | 16.4 | 16.7 | 15.7 | 16.3 |
| 2022-07-05 3:00 PM  | 16.6 | 16.9 | 15.8 | 16.4 |
| 2022-07-05 4:00 PM  | 17.2 | 17.5 | 16.1 | 16.9 |
| 2022-07-05 5:00 PM  | 17.3 | 17.9 | 16.7 | 17.3 |
| 2022-07-05 6:00 PM  | 17.1 | 17.6 | 16.6 | 17.1 |
| 2022-07-05 7:00 PM  | 16.6 | 16.8 | 16.4 | 16.6 |
| 2022-07-05 8:00 PM  | 16.3 | 16.4 | 16.2 | 16.3 |
| 2022-07-05 9:00 PM  | 16.1 | 16.2 | 16.1 | 16.1 |
| 2022-07-05 10:00 PM | 15.9 | 15.9 | 15.9 | 15.9 |
| 2022-07-05 11:00 PM | 15.4 | 15.2 | 15.6 | 15.4 |
| 2022-07-06 12:00 AM | 14.9 | 14.4 | 15.1 | 14.8 |
| 2022-07-06 1:00 AM  | 14.4 | 13.6 | 14.7 | 14.2 |
| 2022-07-06 2:00 AM  | 14.0 | 13.3 | 14.4 | 13.9 |
| 2022-07-06 3:00 AM  | 13.7 | 12.9 | 14.1 | 13.6 |
| 2022-07-06 4:00 AM  | 13.3 | 12.4 | 14.0 | 13.2 |
| 2022-07-06 5:00 AM  | 13.0 | 12.1 | 13.7 | 12.9 |
| 2022-07-06 6:00 AM  | 12.8 | 11.7 | 13.3 | 12.6 |
| 2022-07-06 7:00 AM  | 12.5 | 11.4 | 13.1 | 12.3 |
| 2022-07-06 8:00 AM  | 12.6 | 11.7 | 13.0 | 12.4 |
| 2022-07-06 9:00 AM  | 13.2 | 12.7 | 13.5 | 13.1 |
| 2022-07-06 10:00 AM | 14.8 | 15.1 | 14.2 | 14.7 |
| 2022-07-06 11:00 AM | 19.1 | 21.0 | 15.1 | 18.4 |
| 2022-07-06 12:00 PM | 21.1 | 23.1 | 16.1 | 20.1 |

|                     |      |      |      |      |
|---------------------|------|------|------|------|
| 2022-07-06 1:00 PM  | 22.5 | 22.1 | 17.0 | 20.5 |
| 2022-07-06 2:00 PM  | 21.8 | 21.3 | 18.0 | 20.4 |
| 2022-07-06 3:00 PM  | 20.3 | 21.0 | 20.2 | 20.5 |
| 2022-07-06 4:00 PM  | 19.9 | 20.8 | 21.8 | 20.8 |
| 2022-07-06 5:00 PM  | 19.3 | 20.7 | 21.9 | 20.6 |
| 2022-07-06 6:00 PM  | 18.6 | 19.8 | 20.4 | 19.6 |
| 2022-07-06 7:00 PM  | 17.4 | 17.3 | 17.8 | 17.5 |
| 2022-07-06 8:00 PM  | 16.8 | 16.5 | 17.0 | 16.8 |
| 2022-07-06 9:00 PM  | 16.5 | 16.0 | 16.7 | 16.4 |
| 2022-07-06 10:00 PM | 16.1 | 15.4 | 16.3 | 15.9 |
| 2022-07-06 11:00 PM | 15.2 | 14.3 | 15.6 | 15.0 |
| 2022-07-07 12:00 AM | 14.8 | 13.6 | 15.2 | 14.5 |
| 2022-07-07 1:00 AM  | 14.4 | 13.2 | 14.7 | 14.1 |
| 2022-07-07 2:00 AM  | 13.9 | 12.7 | 14.3 | 13.6 |
| 2022-07-07 3:00 AM  | 13.5 | 12.3 | 14.0 | 13.3 |
| 2022-07-07 4:00 AM  | 12.9 | 11.8 | 13.6 | 12.8 |
| 2022-07-07 5:00 AM  | 12.5 | 11.3 | 13.1 | 12.3 |
| 2022-07-07 6:00 AM  | 12.5 | 11.3 | 13.0 | 12.3 |
| 2022-07-07 7:00 AM  | 12.7 | 11.8 | 13.1 | 12.5 |
| 2022-07-07 8:00 AM  | 13.1 | 12.5 | 13.5 | 13.0 |
| 2022-07-07 9:00 AM  | 13.7 | 13.4 | 14.0 | 13.7 |
| 2022-07-07 10:00 AM | 15.2 | 15.4 | 14.5 | 15.0 |
| 2022-07-07 11:00 AM | 19.0 | 20.5 | 15.3 | 18.3 |
| 2022-07-07 12:00 PM | 21.1 | 23.5 | 16.5 | 20.4 |
| 2022-07-07 1:00 PM  | 22.1 | 22.5 | 17.6 | 20.7 |
| 2022-07-07 2:00 PM  | 21.4 | 21.7 | 18.3 | 20.5 |
| 2022-07-07 3:00 PM  | 21.1 | 22.0 | 20.2 | 21.1 |
| 2022-07-07 4:00 PM  | 20.7 | 21.7 | 21.7 | 21.4 |
| 2022-07-07 5:00 PM  | 20.1 | 21.3 | 21.7 | 21.0 |
| 2022-07-07 6:00 PM  | 19.8 | 20.6 | 20.4 | 20.3 |
| 2022-07-07 7:00 PM  | 19.2 | 19.4 | 18.9 | 19.2 |
| 2022-07-07 8:00 PM  | 18.7 | 18.6 | 18.4 | 18.6 |
| 2022-07-07 9:00 PM  | 18.0 | 18.0 | 17.9 | 18.0 |
| 2022-07-07 10:00 PM | 17.6 | 17.4 | 17.5 | 17.5 |
| 2022-07-07 11:00 PM | 17.2 | 17.0 | 17.2 | 17.1 |
| 2022-07-08 12:00 AM | 16.8 | 16.5 | 16.9 | 16.7 |
| 2022-07-08 1:00 AM  | 16.5 | 16.1 | 16.6 | 16.4 |
| 2022-07-08 2:00 AM  | 15.9 | 15.3 | 16.2 | 15.8 |
| 2022-07-08 3:00 AM  | 15.4 | 14.7 | 15.8 | 15.3 |
| 2022-07-08 4:00 AM  | 14.8 | 13.9 | 15.3 | 14.7 |
| 2022-07-08 5:00 AM  | 14.3 | 13.3 | 14.8 | 14.1 |
| 2022-07-08 6:00 AM  | 13.6 | 12.5 | 14.2 | 13.4 |
| 2022-07-08 7:00 AM  | 13.1 | 12.2 | 13.8 | 13.0 |
| 2022-07-08 8:00 AM  | 13.4 | 12.7 | 14.0 | 13.4 |
| 2022-07-08 9:00 AM  | 14.3 | 13.9 | 14.6 | 14.3 |

|                     |      |      |      |      |
|---------------------|------|------|------|------|
| 2022-07-08 10:00 AM | 15.9 | 16.1 | 15.3 | 15.8 |
| 2022-07-08 11:00 AM | 20.1 | 21.9 | 16.2 | 19.4 |
| 2022-07-08 12:00 PM | 21.5 | 23.3 | 17.2 | 20.7 |
| 2022-07-08 1:00 PM  | 23.3 | 23.2 | 18.3 | 21.6 |
| 2022-07-08 2:00 PM  | 22.4 | 22.1 | 19.2 | 21.2 |
| 2022-07-08 3:00 PM  | 21.6 | 22.3 | 21.5 | 21.8 |
| 2022-07-08 4:00 PM  | 21.2 | 22.1 | 23.6 | 22.3 |
| 2022-07-08 5:00 PM  | 20.7 | 22.1 | 23.9 | 22.2 |
| 2022-07-08 6:00 PM  | 20.3 | 21.3 | 21.7 | 21.1 |
| 2022-07-08 7:00 PM  | 18.9 | 18.9 | 19.3 | 19.0 |
| 2022-07-08 8:00 PM  | 18.4 | 18.2 | 18.6 | 18.4 |
| 2022-07-08 9:00 PM  | 18.1 | 17.8 | 18.3 | 18.1 |
| 2022-07-08 10:00 PM | 17.5 | 17.0 | 17.9 | 17.5 |
| 2022-07-08 11:00 PM | 16.9 | 16.1 | 17.4 | 16.8 |
| 2022-07-09 12:00 AM | 16.4 | 15.6 | 17.1 | 16.4 |
| 2022-07-09 1:00 AM  | 15.8 | 15.0 | 16.4 | 15.7 |
| 2022-07-09 2:00 AM  | 15.5 | 14.7 | 16.0 | 15.4 |
| 2022-07-09 3:00 AM  | 15.0 | 14.2 | 15.6 | 14.9 |
| 2022-07-09 4:00 AM  | 14.5 | 13.4 | 15.2 | 14.4 |
| 2022-07-09 5:00 AM  | 13.9 | 12.8 | 14.8 | 13.8 |
| 2022-07-09 6:00 AM  | 13.6 | 12.6 | 14.4 | 13.5 |
| 2022-07-09 7:00 AM  | 13.3 | 12.2 | 14.0 | 13.2 |
| 2022-07-09 8:00 AM  | 13.5 | 12.8 | 14.1 | 13.5 |
| 2022-07-09 9:00 AM  | 14.6 | 14.4 | 15.0 | 14.7 |
| 2022-07-09 10:00 AM | 16.1 | 16.2 | 15.7 | 16.0 |
| 2022-07-09 11:00 AM | 20.1 | 20.9 | 16.7 | 19.2 |
| 2022-07-09 12:00 PM | 21.6 | 23.3 | 17.8 | 20.9 |
| 2022-07-09 1:00 PM  | 24.1 | 23.2 | 18.8 | 22.0 |
| 2022-07-09 2:00 PM  | 23.7 | 23.0 | 20.0 | 22.2 |
| 2022-07-09 3:00 PM  | 22.1 | 22.7 | 22.1 | 22.3 |
| 2022-07-09 4:00 PM  | 21.6 | 22.5 | 23.6 | 22.6 |
| 2022-07-09 5:00 PM  | 21.1 | 22.3 | 23.3 | 22.2 |
| 2022-07-09 6:00 PM  | 20.9 | 21.9 | 22.1 | 21.6 |
| 2022-07-09 7:00 PM  | 19.3 | 19.2 | 19.6 | 19.4 |
| 2022-07-09 8:00 PM  | 18.6 | 18.4 | 18.9 | 18.6 |
| 2022-07-09 9:00 PM  | 18.3 | 17.9 | 18.5 | 18.2 |
| 2022-07-09 10:00 PM | 17.8 | 17.3 | 18.1 | 17.7 |
| 2022-07-09 11:00 PM | 16.9 | 16.1 | 17.3 | 16.8 |
| 2022-07-10 12:00 AM | 16.3 | 15.5 | 16.8 | 16.2 |
| 2022-07-10 1:00 AM  | 15.8 | 14.9 | 16.4 | 15.7 |
| 2022-07-10 2:00 AM  | 15.3 | 14.3 | 15.9 | 15.2 |
| 2022-07-10 3:00 AM  | 15.3 | 14.6 | 15.8 | 15.2 |
| 2022-07-10 4:00 AM  | 15.3 | 14.7 | 15.7 | 15.2 |
| 2022-07-10 5:00 AM  | 15.0 | 14.4 | 15.3 | 14.9 |
| 2022-07-10 6:00 AM  | 14.9 | 14.1 | 15.2 | 14.7 |

|                     |      |      |      |      |
|---------------------|------|------|------|------|
| 2022-07-10 7:00 AM  | 14.8 | 14.4 | 15.1 | 14.8 |
| 2022-07-10 8:00 AM  | 15.5 | 15.2 | 15.6 | 15.4 |
| 2022-07-10 9:00 AM  | 15.9 | 15.7 | 15.9 | 15.8 |
| 2022-07-10 10:00 AM | 16.9 | 17.0 | 16.3 | 16.7 |
| 2022-07-10 11:00 AM | 18.4 | 18.9 | 16.9 | 18.1 |
| 2022-07-10 12:00 PM | 18.8 | 19.2 | 17.4 | 18.5 |
| 2022-07-10 1:00 PM  | 19.4 | 20.0 | 17.9 | 19.1 |
| 2022-07-10 2:00 PM  | 21.1 | 21.5 | 19.0 | 20.5 |
| 2022-07-10 3:00 PM  | 21.0 | 21.7 | 19.9 | 20.9 |
| 2022-07-10 4:00 PM  | 19.8 | 19.8 | 18.8 | 19.5 |
| 2022-07-10 5:00 PM  | 18.6 | 18.3 | 18.0 | 18.3 |
| 2022-07-10 6:00 PM  | 18.8 | 18.6 | 18.2 | 18.5 |
| 2022-07-10 7:00 PM  | 18.9 | 18.7 | 18.2 | 18.6 |
| 2022-07-10 8:00 PM  | 18.9 | 18.9 | 18.4 | 18.7 |
| 2022-07-10 9:00 PM  | 18.7 | 18.6 | 18.3 | 18.5 |
| 2022-07-10 10:00 PM | 18.2 | 18.0 | 17.9 | 18.0 |
| 2022-07-10 11:00 PM | 17.9 | 17.7 | 17.8 | 17.8 |
| 2022-07-11 12:00 AM | 17.5 | 17.2 | 17.5 | 17.4 |
| 2022-07-11 1:00 AM  | 17.4 | 17.1 | 17.4 | 17.3 |
| 2022-07-11 2:00 AM  | 17.2 | 16.9 | 17.2 | 17.1 |
| 2022-07-11 3:00 AM  | 17.1 | 16.9 | 17.1 | 17.0 |
| 2022-07-11 4:00 AM  | 17.4 | 17.3 | 17.3 | 17.3 |
| 2022-07-11 5:00 AM  | 17.1 | 16.9 | 17.2 | 17.1 |
| 2022-07-11 6:00 AM  | 17.0 | 16.8 | 17.1 | 17.0 |
| 2022-07-11 7:00 AM  | 16.8 | 16.5 | 16.9 | 16.7 |
| 2022-07-11 8:00 AM  | 16.8 | 16.6 | 16.9 | 16.8 |
| 2022-07-11 9:00 AM  | 17.3 | 17.3 | 17.1 | 17.2 |
| 2022-07-11 10:00 AM | 18.2 | 18.5 | 17.5 | 18.1 |
| 2022-07-11 11:00 AM | 21.0 | 22.4 | 18.1 | 20.5 |
| 2022-07-11 12:00 PM | 22.6 | 24.6 | 19.0 | 22.1 |
| 2022-07-11 1:00 PM  | 22.1 | 22.8 | 19.3 | 21.4 |
| 2022-07-11 2:00 PM  | 21.9 | 22.4 | 19.6 | 21.3 |
| 2022-07-11 3:00 PM  | 21.8 | 22.4 | 20.1 | 21.4 |
| 2022-07-11 4:00 PM  | 21.5 | 21.9 | 19.9 | 21.1 |
| 2022-07-11 5:00 PM  | 21.2 | 21.4 | 19.7 | 20.8 |
| 2022-07-11 6:00 PM  | 21.0 | 21.2 | 19.7 | 20.6 |
| 2022-07-11 7:00 PM  | 20.4 | 20.4 | 19.3 | 20.0 |
| 2022-07-11 8:00 PM  | 20.3 | 20.4 | 19.3 | 20.0 |
| 2022-07-11 9:00 PM  | 19.2 | 19.3 | 18.7 | 19.1 |
| 2022-07-11 10:00 PM | 18.6 | 18.3 | 18.3 | 18.4 |
| 2022-07-11 11:00 PM | 18.1 | 17.8 | 18.0 | 18.0 |
| 2022-07-12 12:00 AM | 17.9 | 17.5 | 17.9 | 17.8 |
| 2022-07-12 1:00 AM  | 17.7 | 17.3 | 17.7 | 17.6 |
| 2022-07-12 2:00 AM  | 17.9 | 17.6 | 17.8 | 17.8 |
| 2022-07-12 3:00 AM  | 17.9 | 17.7 | 17.8 | 17.8 |



|                     |      |      |      |      |
|---------------------|------|------|------|------|
| 2022-07-12 4:00 AM  | 17.7 | 17.5 | 17.7 | 17.6 |
| 2022-07-12 5:00 AM  | 17.6 | 17.4 | 17.6 | 17.5 |
| 2022-07-12 6:00 AM  | 17.6 | 17.3 | 17.5 | 17.5 |
| 2022-07-12 7:00 AM  | 17.4 | 17.2 | 17.4 | 17.3 |
| 2022-07-12 8:00 AM  | 17.2 | 17.1 | 17.3 | 17.2 |
| 2022-07-12 9:00 AM  | 17.2 | 17.0 | 17.1 | 17.1 |
| 2022-07-12 10:00 AM | 17.3 | 17.1 | 17.1 | 17.2 |
| 2022-07-12 11:00 AM | 17.1 | 16.8 | 16.9 | 16.9 |
| 2022-07-12 12:00 PM | 16.8 | 16.4 | 16.8 | 16.7 |
| 2022-07-12 1:00 PM  | 16.6 | 16.2 | 16.5 | 16.4 |
| 2022-07-12 2:00 PM  | 17.7 | 17.6 | 17.0 | 17.4 |
| 2022-07-12 3:00 PM  | 19.1 | 19.2 | 18.2 | 18.8 |
| 2022-07-12 4:00 PM  | 19.1 | 19.0 | 18.3 | 18.8 |
| 2022-07-12 5:00 PM  | 18.6 | 18.3 | 17.9 | 18.3 |
| 2022-07-12 6:00 PM  | 18.8 | 18.6 | 18.1 | 18.5 |
| 2022-07-12 7:00 PM  | 18.2 | 17.8 | 17.6 | 17.9 |
| 2022-07-12 8:00 PM  | 17.9 | 17.5 | 17.4 | 17.6 |
| 2022-07-12 9:00 PM  | 17.5 | 17.0 | 17.2 | 17.2 |
| 2022-07-12 10:00 PM | 16.8 | 16.3 | 16.9 | 16.7 |
| 2022-07-12 11:00 PM | 15.8 | 15.2 | 16.2 | 15.7 |
| 2022-07-13 12:00 AM | 15.6 | 14.8 | 15.7 | 15.4 |
| 2022-07-13 1:00 AM  | 14.9 | 14.1 | 15.2 | 14.7 |
| 2022-07-13 2:00 AM  | 14.3 | 13.2 | 14.8 | 14.1 |
| 2022-07-13 3:00 AM  | 14.0 | 12.8 | 14.4 | 13.7 |
| 2022-07-13 4:00 AM  | 13.2 | 12.5 | 13.9 | 13.2 |
| 2022-07-13 5:00 AM  | 12.7 | 12.0 | 13.4 | 12.7 |
| 2022-07-13 6:00 AM  | 12.4 | 11.9 | 13.1 | 12.5 |
| 2022-07-13 7:00 AM  | 12.2 | 11.7 | 13.0 | 12.3 |
| 2022-07-13 8:00 AM  | 12.6 | 12.0 | 13.2 | 12.6 |
| 2022-07-13 9:00 AM  | 13.5 | 13.1 | 14.0 | 13.5 |
| 2022-07-13 10:00 AM | 14.8 | 15.1 | 14.7 | 14.9 |
| 2022-07-13 11:00 AM | 18.4 | 20.2 | 15.6 | 18.1 |
| 2022-07-13 12:00 PM | 20.4 | 22.3 | 16.8 | 19.8 |
| 2022-07-13 1:00 PM  | 21.6 | 21.1 | 17.3 | 20.0 |
| 2022-07-13 2:00 PM  | 21.8 | 21.0 | 18.4 | 20.4 |
| 2022-07-13 3:00 PM  | 20.8 | 19.6 | 19.8 | 20.1 |
| 2022-07-13 4:00 PM  | 20.5 | 19.5 | 21.8 | 20.6 |
| 2022-07-13 5:00 PM  | 20.1 | 19.9 | 23.0 | 21.0 |
| 2022-07-13 6:00 PM  | 19.6 | 19.9 | 21.6 | 20.4 |
| 2022-07-13 7:00 PM  | 18.4 | 18.0 | 18.8 | 18.4 |
| 2022-07-13 8:00 PM  | 17.7 | 17.4 | 17.9 | 17.7 |
| 2022-07-13 9:00 PM  | 17.4 | 17.1 | 17.5 | 17.3 |
| 2022-07-13 10:00 PM | 17.0 | 16.7 | 17.2 | 17.0 |
| 2022-07-13 11:00 PM | 16.2 | 16.0 | 16.6 | 16.3 |
| 2022-07-14 12:00 AM | 15.8 | 15.7 | 16.3 | 15.9 |

|                     |      |      |      |      |
|---------------------|------|------|------|------|
| 2022-07-14 1:00 AM  | 15.3 | 15.4 | 15.8 | 15.5 |
| 2022-07-14 2:00 AM  | 14.6 | 15.2 | 15.6 | 15.1 |
| 2022-07-14 3:00 AM  | 14.5 | 14.7 | 15.0 | 14.7 |
| 2022-07-14 4:00 AM  | 13.8 | 14.1 | 14.6 | 14.2 |
| 2022-07-14 5:00 AM  | 13.1 | 13.6 | 14.1 | 13.6 |
| 2022-07-14 6:00 AM  | 12.6 | 13.0 | 13.6 | 13.1 |
| 2022-07-14 7:00 AM  | 12.2 | 12.7 | 13.3 | 12.7 |
| 2022-07-14 8:00 AM  | 12.8 | 13.1 | 13.5 | 13.1 |
| 2022-07-14 9:00 AM  | 14.1 | 14.1 | 14.2 | 14.1 |
| 2022-07-14 10:00 AM | 15.7 | 15.5 | 15.1 | 15.4 |
| 2022-07-14 11:00 AM | 20.2 | 18.8 | 15.8 | 18.3 |
| 2022-07-14 12:00 PM | 22.4 | 20.1 | 16.6 | 19.7 |
| 2022-07-14 1:00 PM  | 24.5 | 19.6 | 17.4 | 20.5 |
| 2022-07-14 2:00 PM  | 23.9 | 19.5 | 18.9 | 20.8 |
| 2022-07-14 3:00 PM  | 21.7 | 19.4 | 21.9 | 21.0 |
| 2022-07-14 4:00 PM  | 21.3 | 19.6 | 25.2 | 22.0 |
| 2022-07-14 5:00 PM  | 20.8 | 19.8 | 26.9 | 22.5 |
| 2022-07-14 6:00 PM  | 20.2 | 19.6 | 24.7 | 21.5 |
| 2022-07-14 7:00 PM  | 19.0 | 18.2 | 19.8 | 19.0 |
| 2022-07-14 8:00 PM  | 18.3 | 17.7 | 18.7 | 18.2 |
| 2022-07-14 9:00 PM  | 17.8 | 17.4 | 18.2 | 17.8 |
| 2022-07-14 10:00 PM | 17.3 | 17.2 | 17.7 | 17.4 |
| 2022-07-14 11:00 PM | 16.8 | 16.8 | 17.2 | 16.9 |
| 2022-07-15 12:00 AM | 16.2 | 16.4 | 16.7 | 16.4 |
| 2022-07-15 1:00 AM  | 15.9 | 16.1 | 16.4 | 16.1 |
| 2022-07-15 2:00 AM  | 15.6 | 15.9 | 16.1 | 15.9 |
| 2022-07-15 3:00 AM  | 15.5 | 15.7 | 15.9 | 15.7 |
| 2022-07-15 4:00 AM  | 15.3 | 15.5 | 15.8 | 15.5 |
| 2022-07-15 5:00 AM  | 15.5 | 15.6 | 15.8 | 15.6 |
| 2022-07-15 6:00 AM  | 15.3 | 15.4 | 15.8 | 15.5 |
| 2022-07-15 7:00 AM  | 15.1 | 15.3 | 15.5 | 15.3 |
| 2022-07-15 8:00 AM  | 15.4 | 15.5 | 15.6 | 15.5 |
| 2022-07-15 9:00 AM  | 16.2 | 16.1 | 16.1 | 16.1 |
| 2022-07-15 10:00 AM | 16.8 | 16.6 | 16.3 | 16.6 |
| 2022-07-15 11:00 AM | 21.1 | 19.3 | 16.8 | 19.1 |
| 2022-07-15 12:00 PM | 23.6 | 20.8 | 17.5 | 20.6 |
| 2022-07-15 1:00 PM  | 25.2 | 20.3 | 18.2 | 21.2 |
| 2022-07-15 2:00 PM  | 24.0 | 19.8 | 19.4 | 21.1 |
| 2022-07-15 3:00 PM  | 21.7 | 19.9 | 22.0 | 21.2 |
| 2022-07-15 4:00 PM  | 21.1 | 19.9 | 25.2 | 22.1 |
| 2022-07-15 5:00 PM  | 20.8 | 20.2 | 27.2 | 22.7 |
| 2022-07-15 6:00 PM  | 20.2 | 20.0 | 24.8 | 21.7 |
| 2022-07-15 7:00 PM  | 19.7 | 18.9 | 20.4 | 19.7 |
| 2022-07-15 8:00 PM  | 19.6 | 18.9 | 19.8 | 19.4 |
| 2022-07-15 9:00 PM  | 19.1 | 18.6 | 19.3 | 19.0 |

|                     |      |      |      |      |
|---------------------|------|------|------|------|
| 2022-07-15 10:00 PM | 18.7 | 18.3 | 18.9 | 18.6 |
| 2022-07-15 11:00 PM | 17.9 | 17.7 | 18.4 | 18.0 |
| 2022-07-16 12:00 AM | 17.3 | 17.2 | 17.9 | 17.5 |
| 2022-07-16 1:00 AM  | 16.9 | 16.8 | 17.5 | 17.1 |
| 2022-07-16 2:00 AM  | 16.7 | 16.7 | 17.2 | 16.9 |
| 2022-07-16 3:00 AM  | 16.3 | 16.3 | 16.7 | 16.4 |
| 2022-07-16 4:00 AM  | 15.9 | 16.0 | 16.4 | 16.1 |
| 2022-07-16 5:00 AM  | 15.6 | 15.8 | 16.2 | 15.9 |
| 2022-07-16 6:00 AM  | 15.6 | 15.8 | 16.2 | 15.9 |
| 2022-07-16 7:00 AM  | 15.5 | 15.6 | 15.9 | 15.7 |
| 2022-07-16 8:00 AM  | 15.6 | 15.7 | 16.0 | 15.8 |
| 2022-07-16 9:00 AM  | 16.5 | 16.5 | 16.6 | 16.5 |
| 2022-07-16 10:00 AM | 18.1 | 17.5 | 17.2 | 17.6 |
| 2022-07-16 11:00 AM | 22.4 | 20.7 | 18.0 | 20.4 |
| 2022-07-16 12:00 PM | 24.7 | 22.0 | 18.9 | 21.9 |
| 2022-07-16 1:00 PM  | 24.8 | 21.1 | 19.1 | 21.7 |
| 2022-07-16 2:00 PM  | 24.4 | 20.8 | 20.3 | 21.8 |
| 2022-07-16 3:00 PM  | 22.8 | 20.9 | 21.8 | 21.8 |
| 2022-07-16 4:00 PM  | 22.2 | 20.9 | 25.5 | 22.9 |
| 2022-07-16 5:00 PM  | 22.2 | 21.3 | 27.4 | 23.6 |
| 2022-07-16 6:00 PM  | 22.0 | 21.6 | 25.8 | 23.1 |
| 2022-07-16 7:00 PM  | 21.0 | 20.2 | 21.5 | 20.9 |
| 2022-07-16 8:00 PM  | 20.5 | 19.8 | 20.7 | 20.3 |
| 2022-07-16 9:00 PM  | 19.9 | 19.3 | 20.1 | 19.8 |
| 2022-07-16 10:00 PM | 19.2 | 18.8 | 19.4 | 19.1 |
| 2022-07-16 11:00 PM | 18.4 | 18.1 | 18.7 | 18.4 |
| 2022-07-17 12:00 AM | 18.0 | 17.8 | 18.4 | 18.1 |
| 2022-07-17 1:00 AM  | 17.5 | 17.4 | 17.9 | 17.6 |
| 2022-07-17 2:00 AM  | 17.1 | 17.1 | 17.6 | 17.3 |
| 2022-07-17 3:00 AM  | 16.8 | 16.8 | 17.2 | 16.9 |
| 2022-07-17 4:00 AM  | 16.3 | 16.4 | 16.8 | 16.5 |
| 2022-07-17 5:00 AM  | 15.9 | 16.0 | 16.5 | 16.1 |
| 2022-07-17 6:00 AM  | 15.9 | 15.9 | 16.4 | 16.1 |
| 2022-07-17 7:00 AM  | 15.7 | 15.8 | 16.3 | 15.9 |
| 2022-07-17 8:00 AM  | 15.9 | 15.9 | 16.3 | 16.0 |
| 2022-07-17 9:00 AM  | 16.5 | 16.5 | 16.7 | 16.6 |
| 2022-07-17 10:00 AM | 17.6 | 17.3 | 17.1 | 17.3 |
| 2022-07-17 11:00 AM | 20.9 | 19.7 | 17.4 | 19.3 |
| 2022-07-17 12:00 PM | 22.8 | 20.5 | 17.9 | 20.4 |
| 2022-07-17 1:00 PM  | 24.1 | 20.6 | 18.7 | 21.1 |
| 2022-07-17 2:00 PM  | 24.0 | 21.0 | 20.4 | 21.8 |
| 2022-07-17 3:00 PM  | 22.1 | 20.8 | 22.3 | 21.7 |
| 2022-07-17 4:00 PM  | 21.4 | 20.4 | 25.0 | 22.3 |
| 2022-07-17 5:00 PM  | 20.6 | 20.1 | 26.3 | 22.3 |
| 2022-07-17 6:00 PM  | 20.4 | 20.3 | 24.8 | 21.8 |

|                     |      |      |      |      |
|---------------------|------|------|------|------|
| 2022-07-17 7:00 PM  | 19.2 | 18.8 | 20.2 | 19.4 |
| 2022-07-17 8:00 PM  | 18.6 | 18.3 | 19.1 | 18.7 |
| 2022-07-17 9:00 PM  | 18.2 | 17.9 | 18.6 | 18.2 |
| 2022-07-17 10:00 PM | 17.6 | 17.4 | 18.0 | 17.7 |
| 2022-07-17 11:00 PM | 17.1 | 17.0 | 17.6 | 17.2 |
| 2022-07-18 12:00 AM | 17.0 | 17.0 | 17.6 | 17.2 |
| 2022-07-18 1:00 AM  | 16.9 | 16.9 | 17.4 | 17.1 |
| 2022-07-18 2:00 AM  | 16.6 | 16.6 | 17.2 | 16.8 |
| 2022-07-18 3:00 AM  | 16.6 | 16.6 | 17.1 | 16.8 |
| 2022-07-18 4:00 AM  | 16.4 | 16.4 | 16.8 | 16.5 |
| 2022-07-18 5:00 AM  | 16.5 | 16.5 | 16.8 | 16.6 |
| 2022-07-18 6:00 AM  | 16.6 | 16.6 | 16.9 | 16.7 |
| 2022-07-18 7:00 AM  | 16.8 | 16.8 | 17.0 | 16.9 |
| 2022-07-18 8:00 AM  | 16.6 | 16.6 | 16.9 | 16.7 |
| 2022-07-18 9:00 AM  | 17.3 | 17.2 | 17.3 | 17.3 |
| 2022-07-18 10:00 AM | 18.6 | 18.0 | 17.8 | 18.1 |
| 2022-07-18 11:00 AM | 23.0 | 21.3 | 18.8 | 21.0 |
| 2022-07-18 12:00 PM | 26.6 | 23.0 | 20.1 | 23.2 |
| 2022-07-18 1:00 PM  | 27.7 | 23.3 | 21.4 | 24.1 |
| 2022-07-18 2:00 PM  | 27.6 | 23.5 | 22.9 | 24.7 |
| 2022-07-18 3:00 PM  | 25.7 | 23.6 | 23.7 | 24.3 |
| 2022-07-18 4:00 PM  | 25.6 | 23.9 | 26.4 | 25.3 |
| 2022-07-18 5:00 PM  | 25.0 | 23.9 | 28.4 | 25.8 |
| 2022-07-18 6:00 PM  | 24.6 | 23.7 | 26.8 | 25.0 |
| 2022-07-18 7:00 PM  | 23.7 | 22.2 | 23.1 | 23.0 |
| 2022-07-18 8:00 PM  | 23.3 | 22.2 | 22.7 | 22.7 |
| 2022-07-18 9:00 PM  | 23.1 | 22.1 | 22.3 | 22.5 |
| 2022-07-18 10:00 PM | 22.4 | 21.7 | 21.9 | 22.0 |
| 2022-07-18 11:00 PM | 21.8 | 21.1 | 21.5 | 21.5 |
| 2022-07-19 12:00 AM | 21.3 | 20.8 | 21.2 | 21.1 |
| 2022-07-19 1:00 AM  | 21.2 | 20.8 | 21.1 | 21.0 |
| 2022-07-19 2:00 AM  | 21.1 | 20.7 | 21.0 | 20.9 |
| 2022-07-19 3:00 AM  | 20.9 | 20.5 | 20.8 | 20.7 |
| 2022-07-19 4:00 AM  | 20.8 | 20.4 | 20.7 | 20.6 |
| 2022-07-19 5:00 AM  | 20.5 | 20.3 | 20.5 | 20.4 |
| 2022-07-19 6:00 AM  | 20.3 | 20.1 | 20.3 | 20.2 |
| 2022-07-19 7:00 AM  | 20.2 | 20.0 | 20.2 | 20.1 |
| 2022-07-19 8:00 AM  | 20.1 | 19.9 | 20.1 | 20.0 |
| 2022-07-19 9:00 AM  | 20.0 | 19.9 | 20.0 | 20.0 |
| 2022-07-19 10:00 AM | 20.0 | 19.8 | 19.9 | 19.9 |
| 2022-07-19 11:00 AM | 20.0 | 19.8 | 19.9 | 19.9 |
| 2022-07-19 12:00 PM | 19.4 | 19.2 | 19.4 | 19.3 |
| 2022-07-19 1:00 PM  | 18.6 | 18.6 | 18.9 | 18.7 |
| 2022-07-19 2:00 PM  | 19.1 | 19.0 | 19.0 | 19.0 |
| 2022-07-19 3:00 PM  | 19.3 | 19.2 | 19.1 | 19.2 |

|                     |      |      |      |      |
|---------------------|------|------|------|------|
| 2022-07-19 4:00 PM  | 18.8 | 18.7 | 18.7 | 18.7 |
| 2022-07-19 5:00 PM  | 18.7 | 18.5 | 18.4 | 18.5 |
| 2022-07-19 6:00 PM  | 19.4 | 19.1 | 18.9 | 19.1 |
| 2022-07-19 7:00 PM  | 19.4 | 19.2 | 19.0 | 19.2 |
| 2022-07-19 8:00 PM  | 19.1 | 18.9 | 18.8 | 18.9 |
| 2022-07-19 9:00 PM  | 18.5 | 18.4 | 18.5 | 18.5 |
| 2022-07-19 10:00 PM | 18.1 | 18.0 | 18.1 | 18.1 |
| 2022-07-19 11:00 PM | 17.7 | 17.8 | 17.8 | 17.8 |
| 2022-07-20 12:00 AM | 17.7 | 17.7 | 17.7 | 17.7 |
| 2022-07-20 1:00 AM  | 17.7 | 17.6 | 17.7 | 17.7 |
| 2022-07-20 2:00 AM  | 17.6 | 17.5 | 17.6 | 17.6 |
| 2022-07-20 3:00 AM  | 17.4 | 17.3 | 17.4 | 17.4 |
| 2022-07-20 4:00 AM  | 17.2 | 17.1 | 17.3 | 17.2 |
| 2022-07-20 5:00 AM  | 16.8 | 16.8 | 17.1 | 16.9 |
| 2022-07-20 6:00 AM  | 16.4 | 16.4 | 16.7 | 16.5 |
| 2022-07-20 7:00 AM  | 16.1 | 16.1 | 16.3 | 16.2 |
| 2022-07-20 8:00 AM  | 16.2 | 16.2 | 16.3 | 16.2 |
| 2022-07-20 9:00 AM  | 17.1 | 17.0 | 16.9 | 17.0 |
| 2022-07-20 10:00 AM | 18.0 | 17.7 | 17.3 | 17.7 |
| 2022-07-20 11:00 AM | 20.9 | 20.0 | 18.1 | 19.7 |
| 2022-07-20 12:00 PM | 22.1 | 20.8 | 18.9 | 20.6 |
| 2022-07-20 1:00 PM  | 21.9 | 20.9 | 19.5 | 20.8 |
| 2022-07-20 2:00 PM  | 21.7 | 20.8 | 19.7 | 20.7 |
| 2022-07-20 3:00 PM  | 21.0 | 20.3 | 19.7 | 20.3 |
| 2022-07-20 4:00 PM  | 21.0 | 20.5 | 19.8 | 20.4 |
| 2022-07-20 5:00 PM  | 20.8 | 20.3 | 19.7 | 20.3 |
| 2022-07-20 6:00 PM  | 20.9 | 20.4 | 19.8 | 20.4 |
| 2022-07-20 7:00 PM  | 20.8 | 20.3 | 19.9 | 20.3 |
| 2022-07-20 8:00 PM  | 20.7 | 20.2 | 19.9 | 20.3 |
| 2022-07-20 9:00 PM  | 20.6 | 20.2 | 19.8 | 20.2 |
| 2022-07-20 10:00 PM | 20.4 | 20.0 | 19.7 | 20.0 |
| 2022-07-20 11:00 PM | 19.7 | 19.3 | 19.3 | 19.4 |
| 2022-07-21 12:00 AM | 19.0 | 18.7 | 18.9 | 18.9 |
| 2022-07-21 1:00 AM  | 18.7 | 18.5 | 18.7 | 18.6 |
| 2022-07-21 2:00 AM  | 18.3 | 18.1 | 18.4 | 18.3 |
| 2022-07-21 3:00 AM  | 18.0 | 17.9 | 18.2 | 18.0 |
| 2022-07-21 4:00 AM  | 18.1 | 18.0 | 18.2 | 18.1 |
| 2022-07-21 5:00 AM  | 18.0 | 18.0 | 18.2 | 18.1 |
| 2022-07-21 6:00 AM  | 17.9 | 17.9 | 18.1 | 18.0 |
| 2022-07-21 7:00 AM  | 17.7 | 17.7 | 18.0 | 17.8 |
| 2022-07-21 8:00 AM  | 17.7 | 17.6 | 17.9 | 17.7 |
| 2022-07-21 9:00 AM  | 18.0 | 17.9 | 18.0 | 18.0 |
| 2022-07-21 10:00 AM | 18.7 | 18.3 | 18.2 | 18.4 |
| 2022-07-21 11:00 AM | 22.1 | 20.6 | 18.7 | 20.5 |
| 2022-07-21 12:00 PM | 25.5 | 21.9 | 19.5 | 22.3 |

|                     |      |      |      |      |
|---------------------|------|------|------|------|
| 2022-07-21 1:00 PM  | 24.5 | 21.6 | 20.1 | 22.1 |
| 2022-07-21 2:00 PM  | 23.7 | 21.3 | 20.5 | 21.8 |
| 2022-07-21 3:00 PM  | 23.1 | 21.3 | 22.4 | 22.3 |
| 2022-07-21 4:00 PM  | 22.9 | 21.3 | 25.0 | 23.1 |
| 2022-07-21 5:00 PM  | 22.8 | 21.7 | 27.5 | 24.0 |
| 2022-07-21 6:00 PM  | 21.9 | 21.0 | 23.1 | 22.0 |
| 2022-07-21 7:00 PM  | 20.7 | 19.9 | 20.7 | 20.4 |
| 2022-07-21 8:00 PM  | 20.5 | 19.9 | 20.6 | 20.3 |
| 2022-07-21 9:00 PM  | 20.2 | 19.8 | 20.4 | 20.1 |
| 2022-07-21 10:00 PM | 19.9 | 19.5 | 20.0 | 19.8 |
| 2022-07-21 11:00 PM | 19.0 | 18.7 | 19.2 | 19.0 |
| 2022-07-22 12:00 AM | 18.2 | 18.0 | 18.6 | 18.3 |
| 2022-07-22 1:00 AM  | 17.8 | 17.7 | 18.2 | 17.9 |
| 2022-07-22 2:00 AM  | 17.4 | 17.4 | 17.8 | 17.5 |
| 2022-07-22 3:00 AM  | 17.0 | 17.1 | 17.5 | 17.2 |
| 2022-07-22 4:00 AM  | 16.7 | 16.7 | 17.1 | 16.8 |
| 2022-07-22 5:00 AM  | 16.3 | 16.5 | 16.8 | 16.5 |
| 2022-07-22 6:00 AM  | 16.0 | 16.1 | 16.4 | 16.2 |
| 2022-07-22 7:00 AM  | 15.8 | 16.0 | 16.2 | 16.0 |
| 2022-07-22 8:00 AM  | 16.0 | 16.1 | 16.4 | 16.2 |
| 2022-07-22 9:00 AM  | 16.9 | 16.9 | 17.0 | 16.9 |
| 2022-07-22 10:00 AM | 18.2 | 17.9 | 17.7 | 17.9 |
| 2022-07-22 11:00 AM | 21.9 | 20.6 | 18.6 | 20.4 |
| 2022-07-22 12:00 PM | 25.2 | 21.8 | 19.6 | 22.2 |
| 2022-07-22 1:00 PM  | 25.5 | 22.2 | 20.5 | 22.7 |
| 2022-07-22 2:00 PM  | 24.9 | 21.9 | 21.3 | 22.7 |
| 2022-07-22 3:00 PM  | 23.5 | 21.7 | 23.4 | 22.9 |
| 2022-07-22 4:00 PM  | 21.6 | 21.1 | 23.5 | 22.1 |
| 2022-07-22 5:00 PM  | 21.6 | 21.1 | 23.3 | 22.0 |
| 2022-07-22 6:00 PM  | 21.2 | 20.5 | 21.5 | 21.1 |
| 2022-07-22 7:00 PM  | 21.1 | 20.4 | 21.0 | 20.8 |
| 2022-07-22 8:00 PM  | 20.8 | 20.1 | 20.7 | 20.5 |
| 2022-07-22 9:00 PM  | 20.6 | 20.0 | 20.5 | 20.4 |
| 2022-07-22 10:00 PM | 20.2 | 19.8 | 20.2 | 20.1 |
| 2022-07-22 11:00 PM | 19.6 | 19.2 | 19.8 | 19.5 |
| 2022-07-23 12:00 AM | 19.1 | 18.9 | 19.3 | 19.1 |
| 2022-07-23 1:00 AM  | 18.6 | 18.4 | 18.8 | 18.6 |
| 2022-07-23 2:00 AM  | 18.4 | 18.2 | 18.6 | 18.4 |
| 2022-07-23 3:00 AM  | 17.8 | 17.7 | 18.1 | 17.9 |
| 2022-07-23 4:00 AM  | 17.3 | 17.2 | 17.5 | 17.3 |
| 2022-07-23 5:00 AM  | 17.0 | 17.0 | 17.3 | 17.1 |
| 2022-07-23 6:00 AM  | 16.9 | 16.9 | 17.2 | 17.0 |
| 2022-07-23 7:00 AM  | 16.8 | 16.8 | 17.0 | 16.9 |
| 2022-07-23 8:00 AM  | 17.2 | 17.1 | 17.1 | 17.1 |
| 2022-07-23 9:00 AM  | 17.9 | 17.7 | 17.6 | 17.7 |

|                     |      |      |      |      |
|---------------------|------|------|------|------|
| 2022-07-23 10:00 AM | 18.7 | 18.4 | 18.2 | 18.4 |
| 2022-07-23 11:00 AM | 20.4 | 19.4 | 18.6 | 19.5 |
| 2022-07-23 12:00 PM | 24.2 | 20.9 | 19.5 | 21.5 |
| 2022-07-23 1:00 PM  | 23.7 | 21.4 | 20.6 | 21.9 |
| 2022-07-23 2:00 PM  | 22.4 | 21.2 | 20.6 | 21.4 |
| 2022-07-23 3:00 PM  | 22.2 | 21.1 | 20.7 | 21.3 |
| 2022-07-23 4:00 PM  | 20.9 | 20.1 | 19.8 | 20.3 |
| 2022-07-23 5:00 PM  | 21.2 | 20.3 | 20.0 | 20.5 |
| 2022-07-23 6:00 PM  | 20.6 | 19.9 | 19.7 | 20.1 |
| 2022-07-23 7:00 PM  | 19.9 | 19.3 | 19.2 | 19.5 |
| 2022-07-23 8:00 PM  | 19.4 | 19.0 | 19.0 | 19.1 |
| 2022-07-23 9:00 PM  | 19.2 | 18.8 | 18.8 | 18.9 |
| 2022-07-23 10:00 PM | 19.0 | 18.8 | 18.7 | 18.8 |
| 2022-07-23 11:00 PM | 18.8 | 18.6 | 18.6 | 18.7 |
| 2022-07-24 12:00 AM | 18.4 | 18.3 | 18.4 | 18.4 |
| 2022-07-24 1:00 AM  | 18.0 | 17.9 | 18.0 | 18.0 |
| 2022-07-24 2:00 AM  | 18.2 | 18.1 | 18.1 | 18.1 |
| 2022-07-24 3:00 AM  | 18.1 | 18.0 | 18.0 | 18.0 |
| 2022-07-24 4:00 AM  | 18.0 | 17.8 | 17.8 | 17.9 |
| 2022-07-24 5:00 AM  | 17.7 | 17.6 | 17.7 | 17.7 |
| 2022-07-24 6:00 AM  | 17.7 | 17.6 | 17.6 | 17.6 |
| 2022-07-24 7:00 AM  | 17.6 | 17.4 | 17.5 | 17.5 |
| 2022-07-24 8:00 AM  | 17.4 | 17.3 | 17.5 | 17.4 |
| 2022-07-24 9:00 AM  | 17.5 | 17.5 | 17.6 | 17.5 |
| 2022-07-24 10:00 AM | 18.1 | 17.8 | 17.7 | 17.9 |
| 2022-07-24 11:00 AM | 20.2 | 19.6 | 18.1 | 19.3 |
| 2022-07-24 12:00 PM | 19.0 | 18.7 | 18.0 | 18.6 |
| 2022-07-24 1:00 PM  | 18.9 | 18.5 | 18.1 | 18.5 |
| 2022-07-24 2:00 PM  | 18.5 | 18.1 | 17.9 | 18.2 |
| 2022-07-24 3:00 PM  | 17.8 | 17.5 | 17.4 | 17.6 |
| 2022-07-24 4:00 PM  | 17.5 | 17.1 | 17.2 | 17.3 |
| 2022-07-24 5:00 PM  | 17.5 | 17.1 | 18.3 | 17.6 |
| 2022-07-24 6:00 PM  | 17.3 | 16.9 | 18.1 | 17.4 |
| 2022-07-24 7:00 PM  | 16.7 | 16.4 | 17.1 | 16.7 |
| 2022-07-24 8:00 PM  | 16.5 | 16.4 | 16.7 | 16.5 |
| 2022-07-24 9:00 PM  | 16.3 | 16.2 | 16.5 | 16.3 |
| 2022-07-24 10:00 PM | 16.0 | 15.9 | 16.3 | 16.1 |
| 2022-07-24 11:00 PM | 15.8 | 15.6 | 16.0 | 15.8 |
| 2022-07-25 12:00 AM | 15.8 | 15.7 | 16.0 | 15.8 |
| 2022-07-25 1:00 AM  | 15.7 | 15.7 | 16.0 | 15.8 |
| 2022-07-25 2:00 AM  | 15.6 | 15.6 | 15.9 | 15.7 |
| 2022-07-25 3:00 AM  | 15.5 | 15.4 | 15.7 | 15.5 |
| 2022-07-25 4:00 AM  | 15.1 | 15.1 | 15.4 | 15.2 |
| 2022-07-25 5:00 AM  | 14.7 | 14.6 | 15.0 | 14.8 |
| 2022-07-25 6:00 AM  | 14.3 | 14.3 | 14.8 | 14.5 |

|                     |      |      |      |      |
|---------------------|------|------|------|------|
| 2022-07-25 7:00 AM  | 14.2 | 14.1 | 14.5 | 14.3 |
| 2022-07-25 8:00 AM  | 14.3 | 14.3 | 14.6 | 14.4 |
| 2022-07-25 9:00 AM  | 14.8 | 14.8 | 15.0 | 14.9 |
| 2022-07-25 10:00 AM | 16.0 | 15.7 | 15.5 | 15.7 |
| 2022-07-25 11:00 AM | 19.4 | 18.1 | 16.2 | 17.9 |
| 2022-07-25 12:00 PM | 21.9 | 19.3 | 16.9 | 19.4 |
| 2022-07-25 1:00 PM  | 22.1 | 19.4 | 17.7 | 19.7 |
| 2022-07-25 2:00 PM  | 22.0 | 19.5 | 18.6 | 20.0 |
| 2022-07-25 3:00 PM  | 20.6 | 19.3 | 20.1 | 20.0 |
| 2022-07-25 4:00 PM  | 20.7 | 19.7 | 23.3 | 21.2 |
| 2022-07-25 5:00 PM  | 20.4 | 19.6 | 24.3 | 21.4 |
| 2022-07-25 6:00 PM  | 20.4 | 19.8 | 22.8 | 21.0 |
| 2022-07-25 7:00 PM  | 19.5 | 18.8 | 19.7 | 19.3 |
| 2022-07-25 8:00 PM  | 18.9 | 18.3 | 18.9 | 18.7 |
| 2022-07-25 9:00 PM  | 18.6 | 18.1 | 18.7 | 18.5 |
| 2022-07-25 10:00 PM | 18.1 | 17.6 | 18.3 | 18.0 |
| 2022-07-25 11:00 PM | 17.5 | 17.1 | 17.7 | 17.4 |
| 2022-07-26 12:00 AM | 16.8 | 16.5 | 17.1 | 16.8 |
| 2022-07-26 1:00 AM  | 16.2 | 16.0 | 16.5 | 16.2 |
| 2022-07-26 2:00 AM  | 15.9 | 15.7 | 16.3 | 16.0 |
| 2022-07-26 3:00 AM  | 15.6 | 15.5 | 16.0 | 15.7 |
| 2022-07-26 4:00 AM  | 15.4 | 15.3 | 15.9 | 15.5 |
| 2022-07-26 5:00 AM  | 15.0 | 14.9 | 15.4 | 15.1 |
| 2022-07-26 6:00 AM  | 15.0 | 14.8 | 15.3 | 15.0 |
| 2022-07-26 7:00 AM  | 14.9 | 14.7 | 15.3 | 15.0 |
| 2022-07-26 8:00 AM  | 15.1 | 15.0 | 15.4 | 15.2 |
| 2022-07-26 9:00 AM  | 16.0 | 15.9 | 15.9 | 15.9 |
| 2022-07-26 10:00 AM | 17.1 | 16.7 | 16.4 | 16.7 |
| 2022-07-26 11:00 AM | 19.1 | 18.3 | 17.0 | 18.1 |
| 2022-07-26 12:00 PM | 19.9 | 18.8 | 17.6 | 18.8 |
| 2022-07-26 1:00 PM  | 20.3 | 19.0 | 18.1 | 19.1 |
| 2022-07-26 2:00 PM  | 21.6 | 20.0 | 19.5 | 20.4 |
| 2022-07-26 3:00 PM  | 20.7 | 19.8 | 19.4 | 20.0 |
| 2022-07-26 4:00 PM  | 20.2 | 19.4 | 19.1 | 19.6 |
| 2022-07-26 5:00 PM  | 20.4 | 19.7 | 19.6 | 19.9 |
| 2022-07-26 6:00 PM  | 20.4 | 19.7 | 19.5 | 19.9 |
| 2022-07-26 7:00 PM  | 20.0 | 19.3 | 19.2 | 19.5 |
| 2022-07-26 8:00 PM  | 19.6 | 19.0 | 18.9 | 19.2 |
| 2022-07-26 9:00 PM  | 19.1 | 18.7 | 18.7 | 18.8 |
| 2022-07-26 10:00 PM | 19.0 | 18.7 | 18.6 | 18.8 |
| 2022-07-26 11:00 PM | 18.5 | 18.2 | 18.3 | 18.3 |
| 2022-07-27 12:00 AM | 18.1 | 17.9 | 18.0 | 18.0 |
| 2022-07-27 1:00 AM  | 18.3 | 18.0 | 18.1 | 18.1 |
| 2022-07-27 2:00 AM  | 17.9 | 17.7 | 17.9 | 17.8 |
| 2022-07-27 3:00 AM  | 17.8 | 17.6 | 17.8 | 17.7 |



|                     |      |      |      |      |
|---------------------|------|------|------|------|
| 2022-07-27 4:00 AM  | 17.3 | 17.2 | 17.4 | 17.3 |
| 2022-07-27 5:00 AM  | 16.8 | 16.6 | 16.9 | 16.8 |
| 2022-07-27 6:00 AM  | 16.5 | 16.3 | 16.7 | 16.5 |
| 2022-07-27 7:00 AM  | 16.3 | 16.1 | 16.5 | 16.3 |
| 2022-07-27 8:00 AM  | 16.4 | 16.2 | 16.5 | 16.4 |
| 2022-07-27 9:00 AM  | 16.9 | 16.8 | 16.9 | 16.9 |
| 2022-07-27 10:00 AM | 17.8 | 17.5 | 17.2 | 17.5 |
| 2022-07-27 11:00 AM | 20.3 | 19.5 | 17.7 | 19.2 |
| 2022-07-27 12:00 PM | 23.6 | 20.8 | 18.6 | 21.0 |
| 2022-07-27 1:00 PM  | 24.1 | 21.1 | 19.5 | 21.6 |
| 2022-07-27 2:00 PM  | 23.5 | 21.1 | 20.3 | 21.6 |
| 2022-07-27 3:00 PM  | 22.0 | 20.7 | 20.6 | 21.1 |
| 2022-07-27 4:00 PM  | 22.0 | 20.9 | 24.2 | 22.4 |
| 2022-07-27 5:00 PM  | 21.9 | 21.1 | 24.2 | 22.4 |
| 2022-07-27 6:00 PM  | 21.3 | 20.6 | 21.8 | 21.2 |
| 2022-07-27 7:00 PM  | 19.8 | 19.1 | 19.7 | 19.5 |
| 2022-07-27 8:00 PM  | 19.2 | 18.6 | 19.0 | 18.9 |
| 2022-07-27 9:00 PM  | 17.7 | 17.4 | 18.0 | 17.7 |
| 2022-07-27 10:00 PM | 17.7 | 17.4 | 17.7 | 17.6 |
| 2022-07-27 11:00 PM | 17.6 | 17.2 | 17.5 | 17.4 |
| 2022-07-28 12:00 AM | 17.1 | 16.7 | 17.1 | 17.0 |
| 2022-07-28 1:00 AM  | 16.6 | 16.2 | 16.7 | 16.5 |
| 2022-07-28 2:00 AM  | 16.6 | 16.3 | 16.8 | 16.6 |
| 2022-07-28 3:00 AM  | 16.6 | 16.3 | 16.6 | 16.5 |
| 2022-07-28 4:00 AM  | 16.6 | 16.3 | 16.6 | 16.5 |
| 2022-07-28 5:00 AM  | 16.5 | 16.3 | 16.5 | 16.4 |
| 2022-07-28 6:00 AM  | 16.3 | 16.2 | 16.4 | 16.3 |
| 2022-07-28 7:00 AM  | 16.0 | 15.8 | 16.1 | 16.0 |
| 2022-07-28 8:00 AM  | 15.9 | 15.8 | 16.1 | 15.9 |
| 2022-07-28 9:00 AM  | 16.1 | 16.0 | 16.3 | 16.1 |
| 2022-07-28 10:00 AM | 16.4 | 16.3 | 16.2 | 16.3 |
| 2022-07-28 11:00 AM | 18.3 | 17.8 | 16.5 | 17.5 |
| 2022-07-28 12:00 PM | 18.4 | 17.9 | 16.8 | 17.7 |
| 2022-07-28 1:00 PM  | 19.3 | 18.3 | 17.4 | 18.3 |
| 2022-07-28 2:00 PM  | 19.9 | 18.7 | 18.0 | 18.9 |
| 2022-07-28 3:00 PM  | 18.9 | 18.4 | 18.3 | 18.5 |
| 2022-07-28 4:00 PM  | 18.6 | 18.1 | 18.1 | 18.3 |
| 2022-07-28 5:00 PM  | 19.3 | 18.9 | 20.3 | 19.5 |
| 2022-07-28 6:00 PM  | 18.8 | 18.5 | 19.3 | 18.9 |
| 2022-07-28 7:00 PM  | 18.4 | 18.1 | 18.3 | 18.3 |
| 2022-07-28 8:00 PM  | 18.0 | 17.8 | 17.9 | 17.9 |
| 2022-07-28 9:00 PM  | 17.9 | 17.6 | 17.8 | 17.8 |
| 2022-07-28 10:00 PM | 17.3 | 17.0 | 17.4 | 17.2 |
| 2022-07-28 11:00 PM | 17.2 | 16.9 | 17.2 | 17.1 |
| 2022-07-29 12:00 AM | 16.8 | 16.5 | 16.8 | 16.7 |

|                     |      |      |      |      |
|---------------------|------|------|------|------|
| 2022-07-29 1:00 AM  | 16.4 | 16.1 | 16.6 | 16.4 |
| 2022-07-29 2:00 AM  | 16.1 | 15.9 | 16.3 | 16.1 |
| 2022-07-29 3:00 AM  | 16.2 | 16.0 | 16.4 | 16.2 |
| 2022-07-29 4:00 AM  | 16.3 | 16.1 | 16.4 | 16.3 |
| 2022-07-29 5:00 AM  | 16.2 | 16.1 | 16.3 | 16.2 |
| 2022-07-29 6:00 AM  | 16.1 | 15.9 | 16.2 | 16.1 |
| 2022-07-29 7:00 AM  | 16.2 | 16.0 | 16.2 | 16.1 |
| 2022-07-29 8:00 AM  | 16.2 | 16.1 | 16.3 | 16.2 |
| 2022-07-29 9:00 AM  | 16.2 | 16.1 | 16.2 | 16.2 |
| 2022-07-29 10:00 AM | 16.9 | 16.7 | 16.5 | 16.7 |
| 2022-07-29 11:00 AM | 19.4 | 18.2 | 17.0 | 18.2 |
| 2022-07-29 12:00 PM | 19.9 | 18.8 | 17.6 | 18.8 |
| 2022-07-29 1:00 PM  | 20.1 | 19.0 | 18.1 | 19.1 |
| 2022-07-29 2:00 PM  | 19.9 | 19.0 | 18.4 | 19.1 |
| 2022-07-29 3:00 PM  | 19.8 | 18.9 | 18.4 | 19.0 |
| 2022-07-29 4:00 PM  | 19.7 | 19.0 | 18.4 | 19.0 |
| 2022-07-29 5:00 PM  | 19.4 | 18.9 | 18.3 | 18.9 |
| 2022-07-29 6:00 PM  | 19.2 | 18.8 | 18.1 | 18.7 |
| 2022-07-29 7:00 PM  | 19.1 | 18.7 | 18.2 | 18.7 |
| 2022-07-29 8:00 PM  | 18.0 | 17.7 | 17.6 | 17.8 |
| 2022-07-29 9:00 PM  | 17.8 | 17.5 | 17.6 | 17.6 |
| 2022-07-29 10:00 PM | 17.3 | 17.0 | 17.2 | 17.2 |
| 2022-07-29 11:00 PM | 17.2 | 16.9 | 17.1 | 17.1 |
| 2022-07-30 12:00 AM | 17.0 | 16.7 | 16.8 | 16.8 |
| 2022-07-30 1:00 AM  | 16.5 | 16.1 | 16.4 | 16.3 |
| 2022-07-30 2:00 AM  | 16.1 | 15.7 | 16.0 | 15.9 |
| 2022-07-30 3:00 AM  | 15.7 | 15.4 | 15.6 | 15.6 |
| 2022-07-30 4:00 AM  | 15.3 | 15.0 | 15.3 | 15.2 |
| 2022-07-30 5:00 AM  | 15.1 | 14.7 | 15.0 | 14.9 |
| 2022-07-30 6:00 AM  | 14.8 | 14.5 | 15.0 | 14.8 |
| 2022-07-30 7:00 AM  | 14.8 | 14.5 | 15.0 | 14.8 |
| 2022-07-30 8:00 AM  | 14.9 | 14.7 | 15.1 | 14.9 |
| 2022-07-30 9:00 AM  | 15.5 | 15.4 | 15.6 | 15.5 |
| 2022-07-30 10:00 AM | 16.7 | 16.5 | 16.1 | 16.4 |
| 2022-07-30 11:00 AM | 19.8 | 18.4 | 17.1 | 18.4 |
| 2022-07-30 12:00 PM | 23.1 | 20.3 | 18.5 | 20.6 |
| 2022-07-30 1:00 PM  | 23.7 | 20.7 | 19.6 | 21.3 |
| 2022-07-30 2:00 PM  | 22.3 | 20.4 | 19.9 | 20.9 |
| 2022-07-30 3:00 PM  | 21.9 | 20.5 | 21.0 | 21.1 |
| 2022-07-30 4:00 PM  | 21.9 | 20.9 | 23.6 | 22.1 |
| 2022-07-30 5:00 PM  | 22.1 | 21.5 | 26.2 | 23.3 |
| 2022-07-30 6:00 PM  | 21.8 | 21.4 | 24.9 | 22.7 |
| 2022-07-30 7:00 PM  | 21.0 | 20.4 | 21.7 | 21.0 |
| 2022-07-30 8:00 PM  | 20.4 | 19.9 | 20.8 | 20.4 |
| 2022-07-30 9:00 PM  | 20.0 | 19.5 | 20.2 | 19.9 |

|                     |      |      |      |      |
|---------------------|------|------|------|------|
| 2022-07-30 10:00 PM | 19.5 | 19.0 | 19.7 | 19.4 |
| 2022-07-30 11:00 PM | 18.8 | 18.4 | 19.2 | 18.8 |
| 2022-07-31 12:00 AM | 18.3 | 17.9 | 18.6 | 18.3 |
| 2022-07-31 1:00 AM  | 17.9 | 17.6 | 18.2 | 17.9 |
| 2022-07-31 2:00 AM  | 17.8 | 17.4 | 18.0 | 17.7 |
| 2022-07-31 3:00 AM  | 17.5 | 17.2 | 17.7 | 17.5 |
| 2022-07-31 4:00 AM  | 17.3 | 17.0 | 17.5 | 17.3 |
| 2022-07-31 5:00 AM  | 17.1 | 16.8 | 17.2 | 17.0 |
| 2022-07-31 6:00 AM  | 17.2 | 17.0 | 17.3 | 17.2 |
| 2022-07-31 7:00 AM  | 16.9 | 16.6 | 17.0 | 16.8 |
| 2022-07-31 8:00 AM  | 17.0 | 16.7 | 17.0 | 16.9 |
| 2022-07-31 9:00 AM  | 17.8 | 17.5 | 17.5 | 17.6 |
| 2022-07-31 10:00 AM | 18.4 | 18.1 | 17.9 | 18.1 |
| 2022-07-31 11:00 AM | 20.4 | 19.4 | 18.3 | 19.4 |
| 2022-07-31 12:00 PM | 21.7 | 20.3 | 19.0 | 20.3 |
| 2022-07-31 1:00 PM  | 23.1 | 20.8 | 19.7 | 21.2 |
| 2022-07-31 2:00 PM  | 24.0 | 21.6 | 20.9 | 22.2 |
| 2022-07-31 3:00 PM  | 21.6 | 20.4 | 20.0 | 20.7 |
| 2022-07-31 4:00 PM  | 20.9 | 20.0 | 19.8 | 20.2 |
| 2022-07-31 5:00 PM  | 21.7 | 20.9 | 21.2 | 21.3 |
| 2022-07-31 6:00 PM  | 21.0 | 20.3 | 20.3 | 20.5 |
| 2022-07-31 7:00 PM  | 20.5 | 19.9 | 19.8 | 20.1 |
| 2022-07-31 8:00 PM  | 20.1 | 19.6 | 19.5 | 19.7 |
| 2022-07-31 9:00 PM  | 19.7 | 19.1 | 19.2 | 19.3 |
| 2022-07-31 10:00 PM | 19.0 | 18.4 | 18.5 | 18.6 |
| 2022-07-31 11:00 PM | 18.8 | 18.3 | 18.3 | 18.5 |
| 2022-08-01 12:00 AM | 18.4 | 18.0 | 18.1 | 18.2 |
| 2022-08-01 1:00 AM  | 18.0 | 17.7 | 17.9 | 17.9 |
| 2022-08-01 2:00 AM  | 17.9 | 17.7 | 17.8 | 17.8 |
| 2022-08-01 3:00 AM  | 17.9 | 17.7 | 17.8 | 17.8 |
| 2022-08-01 4:00 AM  | 17.9 | 17.7 | 17.7 | 17.8 |
| 2022-08-01 5:00 AM  | 17.9 | 17.7 | 17.8 | 17.8 |
| 2022-08-01 6:00 AM  | 17.7 | 17.6 | 17.7 | 17.7 |
| 2022-08-01 7:00 AM  | 17.8 | 17.8 | 17.8 | 17.8 |
| 2022-08-01 8:00 AM  | 17.9 | 17.8 | 17.8 | 17.8 |
| 2022-08-01 9:00 AM  | 17.7 | 17.7 | 17.6 | 17.7 |
| 2022-08-01 10:00 AM | 17.7 | 17.7 | 17.5 | 17.6 |
| 2022-08-01 11:00 AM | 18.7 | 18.3 | 17.5 | 18.2 |
| 2022-08-01 12:00 PM | 18.5 | 18.2 | 17.6 | 18.1 |
| 2022-08-01 1:00 PM  | 19.1 | 18.5 | 17.9 | 18.5 |
| 2022-08-01 2:00 PM  | 18.9 | 18.3 | 18.0 | 18.4 |
| 2022-08-01 3:00 PM  | 18.9 | 18.4 | 18.3 | 18.5 |
| 2022-08-01 4:00 PM  | 18.9 | 18.4 | 18.5 | 18.6 |
| 2022-08-01 5:00 PM  | 19.4 | 18.9 | 20.7 | 19.7 |
| 2022-08-01 6:00 PM  | 19.2 | 18.8 | 20.4 | 19.5 |

|                     |      |      |      |      |
|---------------------|------|------|------|------|
| 2022-08-01 7:00 PM  | 18.7 | 18.2 | 18.8 | 18.6 |
| 2022-08-01 8:00 PM  | 18.2 | 17.8 | 18.3 | 18.1 |
| 2022-08-01 9:00 PM  | 17.9 | 17.5 | 18.0 | 17.8 |
| 2022-08-01 10:00 PM | 17.3 | 17.1 | 17.6 | 17.3 |
| 2022-08-01 11:00 PM | 16.9 | 16.8 | 17.2 | 17.0 |
| 2022-08-02 12:00 AM | 16.5 | 16.4 | 16.8 | 16.6 |
| 2022-08-02 1:00 AM  | 16.1 | 16.0 | 16.5 | 16.2 |
| 2022-08-02 2:00 AM  | 15.8 | 15.6 | 16.0 | 15.8 |
| 2022-08-02 3:00 AM  | 15.8 | 15.7 | 16.0 | 15.8 |
| 2022-08-02 4:00 AM  | 15.4 | 15.4 | 15.6 | 15.5 |
| 2022-08-02 5:00 AM  | 15.2 | 15.1 | 15.4 | 15.2 |
| 2022-08-02 6:00 AM  | 15.0 | 15.0 | 15.3 | 15.1 |
| 2022-08-02 7:00 AM  | 15.2 | 15.1 | 15.3 | 15.2 |
| 2022-08-02 8:00 AM  | 15.4 | 15.3 | 15.5 | 15.4 |
| 2022-08-02 9:00 AM  | 16.1 | 16.0 | 15.9 | 16.0 |
| 2022-08-02 10:00 AM | 17.3 | 17.0 | 16.6 | 17.0 |
| 2022-08-02 11:00 AM | 19.9 | 18.5 | 17.1 | 18.5 |
| 2022-08-02 12:00 PM | 22.3 | 19.7 | 17.9 | 20.0 |
| 2022-08-02 1:00 PM  | 23.2 | 20.2 | 18.9 | 20.8 |
| 2022-08-02 2:00 PM  | 23.1 | 20.6 | 20.4 | 21.4 |
| 2022-08-02 3:00 PM  | 22.1 | 20.5 | 21.8 | 21.5 |
| 2022-08-02 4:00 PM  | 21.9 | 20.9 | 23.7 | 22.2 |
| 2022-08-02 5:00 PM  | 20.9 | 20.6 | 23.5 | 21.7 |
| 2022-08-02 6:00 PM  | 20.3 | 20.0 | 21.9 | 20.7 |
| 2022-08-02 7:00 PM  | 19.7 | 19.3 | 19.6 | 19.5 |
| 2022-08-02 8:00 PM  | 19.1 | 18.6 | 18.9 | 18.9 |
| 2022-08-02 9:00 PM  | 18.7 | 18.4 | 18.5 | 18.5 |
| 2022-08-02 10:00 PM | 18.5 | 18.2 | 18.3 | 18.3 |
| 2022-08-02 11:00 PM | 18.1 | 17.9 | 18.0 | 18.0 |
| 2022-08-03 12:00 AM | 17.9 | 17.8 | 17.8 | 17.8 |
| 2022-08-03 1:00 AM  | 17.9 | 17.6 | 17.7 | 17.7 |
| 2022-08-03 2:00 AM  | 17.8 | 17.6 | 17.7 | 17.7 |
| 2022-08-03 3:00 AM  | 17.8 | 17.6 | 17.7 | 17.7 |
| 2022-08-03 4:00 AM  | 17.8 | 17.6 | 17.7 | 17.7 |
| 2022-08-03 5:00 AM  | 17.7 | 17.5 | 17.6 | 17.6 |
| 2022-08-03 6:00 AM  | 17.3 | 17.1 | 17.4 | 17.3 |
| 2022-08-03 7:00 AM  | 17.0 | 16.9 | 17.1 | 17.0 |
| 2022-08-03 8:00 AM  | 17.0 | 16.8 | 17.1 | 17.0 |
| 2022-08-03 9:00 AM  | 17.4 | 17.3 | 17.5 | 17.4 |
| 2022-08-03 10:00 AM | 18.5 | 18.3 | 18.1 | 18.3 |
| 2022-08-03 11:00 AM | 21.0 | 19.9 | 19.1 | 20.0 |
| 2022-08-03 12:00 PM | 21.8 | 20.7 | 19.7 | 20.7 |
| 2022-08-03 1:00 PM  | 20.9 | 20.2 | 19.6 | 20.2 |
| 2022-08-03 2:00 PM  | 21.8 | 20.8 | 20.4 | 21.0 |
| 2022-08-03 3:00 PM  | 21.4 | 20.7 | 21.5 | 21.2 |

|                     |      |      |      |      |
|---------------------|------|------|------|------|
| 2022-08-03 4:00 PM  | 21.3 | 20.7 | 23.8 | 21.9 |
| 2022-08-03 5:00 PM  | 21.1 | 20.5 | 23.5 | 21.7 |
| 2022-08-03 6:00 PM  | 20.8 | 20.3 | 21.3 | 20.8 |
| 2022-08-03 7:00 PM  | 20.0 | 19.6 | 20.3 | 20.0 |
| 2022-08-03 8:00 PM  | 19.8 | 19.4 | 20.0 | 19.7 |
| 2022-08-03 9:00 PM  | 19.4 | 19.1 | 19.6 | 19.4 |
| 2022-08-03 10:00 PM | 18.8 | 18.5 | 19.1 | 18.8 |
| 2022-08-03 11:00 PM | 18.4 | 18.2 | 18.7 | 18.4 |
| 2022-08-04 12:00 AM | 18.5 | 18.1 | 18.6 | 18.4 |
| 2022-08-04 1:00 AM  | 18.4 | 17.9 | 18.4 | 18.2 |
| 2022-08-04 2:00 AM  | 17.8 | 17.4 | 17.8 | 17.7 |
| 2022-08-04 3:00 AM  | 17.4 | 17.0 | 17.4 | 17.3 |
| 2022-08-04 4:00 AM  | 16.7 | 16.2 | 16.7 | 16.5 |
| 2022-08-04 5:00 AM  | 16.3 | 15.8 | 16.2 | 16.1 |
| 2022-08-04 6:00 AM  | 16.0 | 15.4 | 15.6 | 15.7 |
| 2022-08-04 7:00 AM  | 15.4 | 15.1 | 15.4 | 15.3 |
| 2022-08-04 8:00 AM  | 15.5 | 15.1 | 15.3 | 15.3 |
| 2022-08-04 9:00 AM  | 15.9 | 15.7 | 15.9 | 15.8 |
| 2022-08-04 10:00 AM | 17.1 | 17.0 | 16.7 | 16.9 |
| 2022-08-04 11:00 AM | 19.4 | 18.4 | 17.5 | 18.4 |
| 2022-08-04 12:00 PM | 21.6 | 19.7 | 18.2 | 19.8 |
| 2022-08-04 1:00 PM  | 22.2 | 20.2 | 19.1 | 20.5 |
| 2022-08-04 2:00 PM  | 22.6 | 20.6 | 20.3 | 21.2 |
| 2022-08-04 3:00 PM  | 21.5 | 20.4 | 21.6 | 21.2 |
| 2022-08-04 4:00 PM  | 21.3 | 20.6 | 24.2 | 22.0 |
| 2022-08-04 5:00 PM  | 20.9 | 20.6 | 25.2 | 22.2 |
| 2022-08-04 6:00 PM  | 20.5 | 20.3 | 24.6 | 21.8 |
| 2022-08-04 7:00 PM  | 19.8 | 19.4 | 20.7 | 20.0 |
| 2022-08-04 8:00 PM  | 19.4 | 19.0 | 19.8 | 19.4 |
| 2022-08-04 9:00 PM  | 19.1 | 18.6 | 19.3 | 19.0 |
| 2022-08-04 10:00 PM | 18.6 | 18.1 | 18.8 | 18.5 |
| 2022-08-04 11:00 PM | 18.2 | 17.7 | 18.3 | 18.1 |
| 2022-08-05 12:00 AM | 17.7 | 17.3 | 17.9 | 17.6 |
| 2022-08-05 1:00 AM  | 17.3 | 16.9 | 17.4 | 17.2 |
| 2022-08-05 2:00 AM  | 16.9 | 16.5 | 17.1 | 16.8 |
| 2022-08-05 3:00 AM  | 16.6 | 16.2 | 16.8 | 16.5 |
| 2022-08-05 4:00 AM  | 16.3 | 16.0 | 16.6 | 16.3 |
| 2022-08-05 5:00 AM  | 16.3 | 16.0 | 16.4 | 16.2 |
| 2022-08-05 6:00 AM  | 16.1 | 15.8 | 16.4 | 16.1 |
| 2022-08-05 7:00 AM  | 15.9 | 15.6 | 16.1 | 15.9 |
| 2022-08-05 8:00 AM  | 16.2 | 16.1 | 16.4 | 16.2 |
| 2022-08-05 9:00 AM  | 16.6 | 16.6 | 16.7 | 16.6 |
| 2022-08-05 10:00 AM | 17.3 | 17.2 | 17.0 | 17.2 |
| 2022-08-05 11:00 AM | 19.3 | 18.3 | 17.4 | 18.3 |
| 2022-08-05 12:00 PM | 21.9 | 19.7 | 18.3 | 20.0 |

|                     |      |      |      |      |
|---------------------|------|------|------|------|
| 2022-08-05 1:00 PM  | 23.3 | 20.7 | 19.9 | 21.3 |
| 2022-08-05 2:00 PM  | 23.4 | 21.2 | 21.3 | 22.0 |
| 2022-08-05 3:00 PM  | 22.1 | 21.0 | 21.7 | 21.6 |
| 2022-08-05 4:00 PM  | 22.1 | 21.3 | 25.5 | 23.0 |
| 2022-08-05 5:00 PM  | 21.9 | 21.3 | 25.0 | 22.7 |
| 2022-08-05 6:00 PM  | 21.1 | 20.4 | 21.3 | 20.9 |
| 2022-08-05 7:00 PM  | 20.3 | 19.8 | 20.2 | 20.1 |
| 2022-08-05 8:00 PM  | 20.1 | 19.7 | 20.0 | 19.9 |
| 2022-08-05 9:00 PM  | 19.9 | 19.4 | 19.7 | 19.7 |
| 2022-08-05 10:00 PM | 19.4 | 19.1 | 19.2 | 19.2 |
| 2022-08-05 11:00 PM | 19.1 | 18.9 | 19.0 | 19.0 |
| 2022-08-06 12:00 AM | 18.6 | 18.4 | 18.4 | 18.5 |
| 2022-08-06 1:00 AM  | 18.5 | 18.4 | 18.4 | 18.4 |
| 2022-08-06 2:00 AM  | 18.7 | 18.5 | 18.6 | 18.6 |
| 2022-08-06 3:00 AM  | 18.7 | 18.5 | 18.6 | 18.6 |
| 2022-08-06 4:00 AM  | 18.6 | 18.5 | 18.6 | 18.6 |
| 2022-08-06 5:00 AM  | 18.7 | 18.6 | 18.6 | 18.6 |
| 2022-08-06 6:00 AM  | 18.8 | 18.7 | 18.8 | 18.8 |
| 2022-08-06 7:00 AM  | 18.7 | 18.6 | 18.7 | 18.7 |
| 2022-08-06 8:00 AM  | 18.8 | 18.7 | 18.7 | 18.7 |
| 2022-08-06 9:00 AM  | 19.2 | 19.0 | 19.0 | 19.1 |
| 2022-08-06 10:00 AM | 20.1 | 19.7 | 19.6 | 19.8 |
| 2022-08-06 11:00 AM | 20.9 | 20.3 | 20.0 | 20.4 |
| 2022-08-06 12:00 PM | 21.6 | 20.9 | 20.4 | 21.0 |
| 2022-08-06 1:00 PM  | 21.8 | 21.2 | 20.7 | 21.2 |
| 2022-08-06 2:00 PM  | 21.9 | 21.3 | 20.9 | 21.4 |
| 2022-08-06 3:00 PM  | 22.0 | 21.5 | 22.3 | 21.9 |
| 2022-08-06 4:00 PM  | 22.0 | 21.5 | 23.6 | 22.4 |
| 2022-08-06 5:00 PM  | 21.3 | 21.0 | 23.9 | 22.1 |
| 2022-08-06 6:00 PM  | 21.8 | 21.4 | 22.6 | 21.9 |
| 2022-08-06 7:00 PM  | 21.4 | 21.0 | 21.6 | 21.3 |
| 2022-08-06 8:00 PM  | 20.5 | 20.0 | 20.8 | 20.4 |
| 2022-08-06 9:00 PM  | 20.1 | 19.8 | 20.3 | 20.1 |
| 2022-08-06 10:00 PM | 19.7 | 19.4 | 19.9 | 19.7 |
| 2022-08-06 11:00 PM | 19.0 | 18.8 | 19.3 | 19.0 |
| 2022-08-07 12:00 AM | 18.3 | 18.0 | 18.5 | 18.3 |
| 2022-08-07 1:00 AM  | 18.0 | 17.7 | 18.2 | 18.0 |
| 2022-08-07 2:00 AM  | 17.6 | 17.5 | 17.9 | 17.7 |
| 2022-08-07 3:00 AM  | 17.5 | 17.3 | 17.7 | 17.5 |
| 2022-08-07 4:00 AM  | 17.3 | 17.1 | 17.5 | 17.3 |
| 2022-08-07 5:00 AM  | 17.1 | 16.9 | 17.2 | 17.1 |
| 2022-08-07 6:00 AM  | 16.7 | 16.7 | 17.0 | 16.8 |
| 2022-08-07 7:00 AM  | 16.5 | 16.5 | 16.8 | 16.6 |
| 2022-08-07 8:00 AM  | 16.4 | 16.4 | 16.7 | 16.5 |
| 2022-08-07 9:00 AM  | 16.6 | 16.6 | 16.7 | 16.6 |

|                     |      |      |      |      |
|---------------------|------|------|------|------|
| 2022-08-07 10:00 AM | 17.1 | 17.0 | 16.9 | 17.0 |
| 2022-08-07 11:00 AM | 18.7 | 18.0 | 17.3 | 18.0 |
| 2022-08-07 12:00 PM | 20.5 | 18.7 | 17.8 | 19.0 |
| 2022-08-07 1:00 PM  | 21.8 | 19.2 | 18.6 | 19.9 |
| 2022-08-07 2:00 PM  | 21.6 | 19.8 | 19.6 | 20.3 |
| 2022-08-07 3:00 PM  | 20.7 | 19.8 | 21.7 | 20.7 |
| 2022-08-07 4:00 PM  | 19.6 | 19.3 | 24.1 | 21.0 |
| 2022-08-07 5:00 PM  | 19.0 | 18.8 | 22.1 | 20.0 |
| 2022-08-07 6:00 PM  | 18.8 | 18.3 | 19.2 | 18.8 |
| 2022-08-07 7:00 PM  | 18.5 | 17.9 | 18.2 | 18.2 |
| 2022-08-07 8:00 PM  | 18.2 | 17.5 | 17.7 | 17.8 |
| 2022-08-07 9:00 PM  | 17.7 | 17.1 | 17.4 | 17.4 |
| 2022-08-07 10:00 PM | 17.3 | 16.8 | 17.2 | 17.1 |
| 2022-08-07 11:00 PM | 17.1 | 16.7 | 16.9 | 16.9 |
| 2022-08-08 12:00 AM | 17.0 | 16.5 | 16.7 | 16.7 |
| 2022-08-08 1:00 AM  | 16.7 | 16.4 | 16.6 | 16.6 |
| 2022-08-08 2:00 AM  | 16.6 | 16.1 | 16.4 | 16.4 |
| 2022-08-08 3:00 AM  | 16.3 | 15.8 | 15.9 | 16.0 |
| 2022-08-08 4:00 AM  | 16.2 | 15.7 | 15.9 | 15.9 |
| 2022-08-08 5:00 AM  | 16.1 | 15.7 | 15.8 | 15.9 |
| 2022-08-08 6:00 AM  | 16.0 | 15.7 | 15.8 | 15.8 |
| 2022-08-08 7:00 AM  | 15.9 | 15.5 | 15.7 | 15.7 |
| 2022-08-08 8:00 AM  | 15.9 | 15.6 | 15.7 | 15.7 |
| 2022-08-08 9:00 AM  | 16.1 | 15.9 | 15.9 | 16.0 |
| 2022-08-08 10:00 AM | 16.8 | 16.4 | 16.3 | 16.5 |
| 2022-08-08 11:00 AM | 18.9 | 17.7 | 16.8 | 17.8 |
| 2022-08-08 12:00 PM | 21.1 | 18.8 | 17.6 | 19.2 |
| 2022-08-08 1:00 PM  | 22.0 | 19.2 | 18.6 | 19.9 |
| 2022-08-08 2:00 PM  | 22.2 | 19.6 | 19.8 | 20.5 |
| 2022-08-08 3:00 PM  | 21.2 | 19.6 | 22.0 | 20.9 |
| 2022-08-08 4:00 PM  | 20.8 | 19.8 | 22.6 | 21.1 |
| 2022-08-08 5:00 PM  | 20.8 | 20.1 | 24.0 | 21.6 |
| 2022-08-08 6:00 PM  | 20.4 | 19.7 | 21.9 | 20.7 |
| 2022-08-08 7:00 PM  | 20.0 | 19.4 | 20.3 | 19.9 |
| 2022-08-08 8:00 PM  | 19.2 | 18.8 | 19.5 | 19.2 |
| 2022-08-08 9:00 PM  | 18.8 | 18.5 | 19.1 | 18.8 |
| 2022-08-08 10:00 PM | 18.3 | 18.1 | 18.6 | 18.3 |
| 2022-08-08 11:00 PM | 17.7 | 17.6 | 18.1 | 17.8 |
| 2022-08-09 12:00 AM | 17.1 | 17.1 | 17.5 | 17.2 |
| 2022-08-09 1:00 AM  | 16.7 | 16.8 | 17.2 | 16.9 |
| 2022-08-09 2:00 AM  | 16.3 | 16.5 | 16.8 | 16.5 |
| 2022-08-09 3:00 AM  | 16.0 | 16.2 | 16.5 | 16.2 |
| 2022-08-09 4:00 AM  | 15.6 | 15.9 | 16.1 | 15.9 |
| 2022-08-09 5:00 AM  | 15.4 | 15.6 | 15.9 | 15.6 |
| 2022-08-09 6:00 AM  | 15.1 | 15.4 | 15.6 | 15.4 |

|                     |      |      |      |      |
|---------------------|------|------|------|------|
| 2022-08-09 7:00 AM  | 14.9 | 15.2 | 15.4 | 15.2 |
| 2022-08-09 8:00 AM  | 14.8 | 15.2 | 15.5 | 15.2 |
| 2022-08-09 9:00 AM  | 15.5 | 15.7 | 15.9 | 15.7 |
| 2022-08-09 10:00 AM | 17.5 | 17.4 | 16.6 | 17.2 |
| 2022-08-09 11:00 AM | 20.3 | 18.8 | 17.3 | 18.8 |
| 2022-08-09 12:00 PM | 22.3 | 19.8 | 18.3 | 20.1 |
| 2022-08-09 1:00 PM  | 22.5 | 20.0 | 19.5 | 20.7 |
| 2022-08-09 2:00 PM  | 22.3 | 20.1 | 20.8 | 21.1 |
| 2022-08-09 3:00 PM  | 21.5 | 20.0 | 23.4 | 21.6 |
| 2022-08-09 4:00 PM  | 21.5 | 20.4 | 25.0 | 22.3 |
| 2022-08-09 5:00 PM  | 21.7 | 20.9 | 25.2 | 22.6 |
| 2022-08-09 6:00 PM  | 21.7 | 20.9 | 24.7 | 22.4 |
| 2022-08-09 7:00 PM  | 21.2 | 20.4 | 22.1 | 21.2 |
| 2022-08-09 8:00 PM  | 21.1 | 20.4 | 21.6 | 21.0 |
| 2022-08-09 9:00 PM  | 20.9 | 20.3 | 21.3 | 20.8 |
| 2022-08-09 10:00 PM | 20.5 | 20.1 | 20.9 | 20.5 |
| 2022-08-09 11:00 PM | 20.3 | 19.9 | 20.7 | 20.3 |
| 2022-08-10 12:00 AM | 19.9 | 19.6 | 20.4 | 20.0 |
| 2022-08-10 1:00 AM  | 19.3 | 19.2 | 19.8 | 19.4 |
| 2022-08-10 2:00 AM  | 18.9 | 18.8 | 19.3 | 19.0 |
| 2022-08-10 3:00 AM  | 18.3 | 18.3 | 18.8 | 18.5 |
| 2022-08-10 4:00 AM  | 17.5 | 17.7 | 18.1 | 17.8 |
| 2022-08-10 5:00 AM  | 17.1 | 17.2 | 17.7 | 17.3 |
| 2022-08-10 6:00 AM  | 17.1 | 17.3 | 17.7 | 17.4 |
| 2022-08-10 7:00 AM  | 16.8 | 17.1 | 17.5 | 17.1 |
| 2022-08-10 8:00 AM  | 16.7 | 16.9 | 17.2 | 16.9 |
| 2022-08-10 9:00 AM  | 17.0 | 17.1 | 17.4 | 17.2 |
| 2022-08-10 10:00 AM | 17.9 | 17.8 | 17.7 | 17.8 |
| 2022-08-10 11:00 AM | 21.0 | 19.4 | 18.2 | 19.5 |
| 2022-08-10 12:00 PM | 22.4 | 20.1 | 18.9 | 20.5 |
| 2022-08-10 1:00 PM  | 21.9 | 19.6 | 19.0 | 20.2 |
| 2022-08-10 2:00 PM  | 21.4 | 19.0 | 19.0 | 19.8 |
| 2022-08-10 3:00 PM  | 21.0 | 19.1 | 21.8 | 20.6 |
| 2022-08-10 4:00 PM  | 20.2 | 18.7 | 21.5 | 20.1 |
| 2022-08-10 5:00 PM  | 20.5 | 19.3 | 22.5 | 20.8 |
| 2022-08-10 6:00 PM  | 20.1 | 18.9 | 21.5 | 20.2 |
| 2022-08-10 7:00 PM  | 19.3 | 18.4 | 19.5 | 19.1 |
| 2022-08-10 8:00 PM  | 19.1 | 18.4 | 19.2 | 18.9 |
| 2022-08-10 9:00 PM  | 18.8 | 18.3 | 18.9 | 18.7 |
| 2022-08-10 10:00 PM | 18.3 | 18.0 | 18.6 | 18.3 |
| 2022-08-10 11:00 PM | 17.8 | 17.6 | 18.1 | 17.8 |
| 2022-08-11 12:00 AM | 17.3 | 17.2 | 17.5 | 17.3 |
| 2022-08-11 1:00 AM  | 16.7 | 16.9 | 17.0 | 16.9 |
| 2022-08-11 2:00 AM  | 16.2 | 16.5 | 16.4 | 16.4 |
| 2022-08-11 3:00 AM  | 16.1 | 16.2 | 16.0 | 16.1 |



|                     |      |      |      |      |
|---------------------|------|------|------|------|
| 2022-08-11 4:00 AM  | 15.6 | 15.8 | 15.8 | 15.7 |
| 2022-08-11 5:00 AM  | 15.3 | 15.5 | 15.5 | 15.4 |
| 2022-08-11 6:00 AM  | 14.8 | 15.2 | 15.2 | 15.1 |
| 2022-08-11 7:00 AM  | 14.2 | 14.7 | 14.6 | 14.5 |
| 2022-08-11 8:00 AM  | 13.8 | 14.4 | 14.4 | 14.2 |
| 2022-08-11 9:00 AM  | 14.4 | 14.8 | 14.9 | 14.7 |
| 2022-08-11 10:00 AM | 15.9 | 16.0 | 15.7 | 15.9 |
| 2022-08-11 11:00 AM | 19.2 | 17.7 | 16.5 | 17.8 |
| 2022-08-11 12:00 PM | 21.6 | 19.0 | 17.4 | 19.3 |
| 2022-08-11 1:00 PM  | 21.6 | 19.1 | 18.5 | 19.7 |
| 2022-08-11 2:00 PM  | 21.8 | 19.6 | 20.0 | 20.5 |
| 2022-08-11 3:00 PM  | 20.7 | 19.3 | 22.8 | 20.9 |
| 2022-08-11 4:00 PM  | 20.3 | 19.6 | 24.3 | 21.4 |
| 2022-08-11 5:00 PM  | 20.2 | 19.8 | 24.8 | 21.6 |
| 2022-08-11 6:00 PM  | 20.0 | 19.6 | 24.1 | 21.2 |
| 2022-08-11 7:00 PM  | 19.3 | 18.9 | 20.4 | 19.5 |
| 2022-08-11 8:00 PM  | 18.8 | 18.4 | 19.4 | 18.9 |
| 2022-08-11 9:00 PM  | 18.3 | 18.0 | 18.8 | 18.4 |
| 2022-08-11 10:00 PM | 17.5 | 17.4 | 18.2 | 17.7 |
| 2022-08-11 11:00 PM | 17.0 | 17.0 | 17.6 | 17.2 |
| 2022-08-12 12:00 AM | 16.5 | 16.4 | 17.0 | 16.6 |
| 2022-08-12 1:00 AM  | 16.0 | 15.9 | 16.5 | 16.1 |
| 2022-08-12 2:00 AM  | 15.6 | 15.5 | 16.0 | 15.7 |
| 2022-08-12 3:00 AM  | 15.2 | 15.0 | 15.6 | 15.3 |
| 2022-08-12 4:00 AM  | 14.9 | 14.8 | 15.0 | 14.9 |
| 2022-08-12 5:00 AM  | 14.4 | 14.5 | 14.5 | 14.5 |
| 2022-08-12 6:00 AM  | 13.9 | 14.1 | 14.0 | 14.0 |
| 2022-08-12 7:00 AM  | 13.5 | 13.8 | 13.8 | 13.7 |
| 2022-08-12 8:00 AM  | 13.6 | 13.6 | 13.6 | 13.6 |
| 2022-08-12 9:00 AM  | 13.5 | 13.8 | 13.9 | 13.7 |
| 2022-08-12 10:00 AM | 15.3 | 15.3 | 15.2 | 15.3 |
| 2022-08-12 11:00 AM | 17.5 | 16.9 | 16.1 | 16.8 |
| 2022-08-12 12:00 PM | 18.6 | 17.6 | 16.8 | 17.7 |
| 2022-08-12 1:00 PM  | 19.3 | 17.8 | 17.4 | 18.2 |
| 2022-08-12 2:00 PM  | 19.7 | 18.1 | 18.4 | 18.7 |
| 2022-08-12 3:00 PM  | 18.9 | 18.1 | 20.5 | 19.2 |
| 2022-08-12 4:00 PM  | 18.7 | 18.2 | 22.7 | 19.9 |
| 2022-08-12 5:00 PM  | 18.7 | 18.5 | 22.5 | 19.9 |
| 2022-08-12 6:00 PM  | 18.8 | 18.6 | 21.5 | 19.6 |
| 2022-08-12 7:00 PM  | 18.2 | 18.0 | 19.1 | 18.4 |
| 2022-08-12 8:00 PM  | 17.7 | 17.5 | 18.2 | 17.8 |
| 2022-08-12 9:00 PM  | 17.3 | 17.1 | 17.8 | 17.4 |
| 2022-08-12 10:00 PM | 16.9 | 16.8 | 17.4 | 17.0 |
| 2022-08-12 11:00 PM | 16.5 | 16.4 | 16.9 | 16.6 |
| 2022-08-13 12:00 AM | 16.2 | 16.0 | 16.6 | 16.3 |

|                     |      |      |      |      |
|---------------------|------|------|------|------|
| 2022-08-13 1:00 AM  | 16.0 | 15.7 | 16.2 | 16.0 |
| 2022-08-13 2:00 AM  | 15.7 | 15.5 | 15.9 | 15.7 |
| 2022-08-13 3:00 AM  | 15.6 | 15.5 | 15.9 | 15.7 |
| 2022-08-13 4:00 AM  | 15.9 | 15.8 | 16.1 | 15.9 |
| 2022-08-13 5:00 AM  | 16.0 | 16.0 | 16.2 | 16.1 |
| 2022-08-13 6:00 AM  | 16.1 | 16.1 | 16.3 | 16.2 |
| 2022-08-13 7:00 AM  | 16.1 | 16.2 | 16.3 | 16.2 |
| 2022-08-13 8:00 AM  | 16.2 | 16.2 | 16.4 | 16.3 |
| 2022-08-13 9:00 AM  | 16.4 | 16.5 | 16.5 | 16.5 |
| 2022-08-13 10:00 AM | 16.8 | 16.8 | 16.8 | 16.8 |
| 2022-08-13 11:00 AM | 17.2 | 17.1 | 17.0 | 17.1 |
| 2022-08-13 12:00 PM | 18.5 | 18.1 | 17.8 | 18.1 |
| 2022-08-13 1:00 PM  | 20.5 | 19.0 | 19.0 | 19.5 |
| 2022-08-13 2:00 PM  | 21.1 | 19.4 | 20.4 | 20.3 |
| 2022-08-13 3:00 PM  | 20.6 | 19.5 | 23.9 | 21.3 |
| 2022-08-13 4:00 PM  | 20.0 | 19.3 | 24.7 | 21.3 |
| 2022-08-13 5:00 PM  | 19.8 | 19.5 | 24.2 | 21.2 |
| 2022-08-13 6:00 PM  | 19.5 | 19.3 | 23.6 | 20.8 |
| 2022-08-13 7:00 PM  | 18.6 | 18.4 | 20.0 | 19.0 |
| 2022-08-13 8:00 PM  | 18.0 | 17.8 | 18.8 | 18.2 |
| 2022-08-13 9:00 PM  | 17.4 | 17.4 | 18.2 | 17.7 |
| 2022-08-13 10:00 PM | 17.4 | 17.3 | 18.0 | 17.6 |
| 2022-08-13 11:00 PM | 17.5 | 17.4 | 18.0 | 17.6 |
| 2022-08-14 12:00 AM | 17.2 | 17.2 | 17.7 | 17.4 |
| 2022-08-14 1:00 AM  | 17.0 | 17.0 | 17.5 | 17.2 |
| 2022-08-14 2:00 AM  | 17.2 | 17.1 | 17.4 | 17.2 |
| 2022-08-14 3:00 AM  | 17.1 | 17.0 | 17.3 | 17.1 |
| 2022-08-14 4:00 AM  | 17.1 | 16.9 | 17.2 | 17.1 |
| 2022-08-14 5:00 AM  | 17.0 | 16.9 | 17.1 | 17.0 |
| 2022-08-14 6:00 AM  | 17.0 | 16.9 | 17.0 | 17.0 |
| 2022-08-14 7:00 AM  | 16.9 | 16.8 | 17.0 | 16.9 |
| 2022-08-14 8:00 AM  | 17.0 | 16.9 | 17.0 | 17.0 |
| 2022-08-14 9:00 AM  | 17.1 | 17.0 | 17.1 | 17.1 |
| 2022-08-14 10:00 AM | 17.2 | 17.2 | 17.2 | 17.2 |
| 2022-08-14 11:00 AM | 17.5 | 17.4 | 17.3 | 17.4 |
| 2022-08-14 12:00 PM | 17.5 | 17.4 | 17.4 | 17.4 |
| 2022-08-14 1:00 PM  | 18.3 | 18.0 | 17.9 | 18.1 |
| 2022-08-14 2:00 PM  | 19.2 | 18.5 | 18.8 | 18.8 |
| 2022-08-14 3:00 PM  | 19.9 | 19.1 | 20.4 | 19.8 |
| 2022-08-14 4:00 PM  | 19.8 | 19.1 | 19.7 | 19.5 |
| 2022-08-14 5:00 PM  | 19.6 | 19.1 | 20.5 | 19.7 |
| 2022-08-14 6:00 PM  | 19.1 | 18.8 | 21.0 | 19.6 |
| 2022-08-14 7:00 PM  | 18.6 | 18.3 | 19.1 | 18.7 |
| 2022-08-14 8:00 PM  | 18.3 | 18.1 | 18.5 | 18.3 |
| 2022-08-14 9:00 PM  | 17.8 | 17.7 | 17.9 | 17.8 |

|                     |      |      |      |      |
|---------------------|------|------|------|------|
| 2022-08-14 10:00 PM | 17.1 | 17.1 | 17.5 | 17.2 |
| 2022-08-14 11:00 PM | 16.8 | 16.8 | 17.2 | 16.9 |
| 2022-08-15 12:00 AM | 16.6 | 16.7 | 17.0 | 16.8 |
| 2022-08-15 1:00 AM  | 16.9 | 16.8 | 17.1 | 16.9 |
| 2022-08-15 2:00 AM  | 17.0 | 16.9 | 17.1 | 17.0 |
| 2022-08-15 3:00 AM  | 16.8 | 16.8 | 17.0 | 16.9 |
| 2022-08-15 4:00 AM  | 17.0 | 16.9 | 17.1 | 17.0 |
| 2022-08-15 5:00 AM  | 16.9 | 16.9 | 17.0 | 16.9 |
| 2022-08-15 6:00 AM  | 16.8 | 16.8 | 16.9 | 16.8 |
| 2022-08-15 7:00 AM  | 16.8 | 16.8 | 16.9 | 16.8 |
| 2022-08-15 8:00 AM  | 16.8 | 16.8 | 16.9 | 16.8 |
| 2022-08-15 9:00 AM  | 17.1 | 17.0 | 17.0 | 17.0 |
| 2022-08-15 10:00 AM | 17.6 | 17.4 | 17.4 | 17.5 |
| 2022-08-15 11:00 AM | 18.7 | 18.1 | 17.9 | 18.2 |
| 2022-08-15 12:00 PM | 20.6 | 19.2 | 18.6 | 19.5 |
| 2022-08-15 1:00 PM  | 21.7 | 19.7 | 19.7 | 20.4 |
| 2022-08-15 2:00 PM  | 21.8 | 20.0 | 20.8 | 20.9 |
| 2022-08-15 3:00 PM  | 21.1 | 20.1 | 23.2 | 21.5 |
| 2022-08-15 4:00 PM  | 20.4 | 20.0 | 23.9 | 21.4 |
| 2022-08-15 5:00 PM  | 20.2 | 20.0 | 23.6 | 21.3 |
| 2022-08-15 6:00 PM  | 20.1 | 19.8 | 23.1 | 21.0 |
| 2022-08-15 7:00 PM  | 19.3 | 19.0 | 20.3 | 19.5 |
| 2022-08-15 8:00 PM  | 18.9 | 18.6 | 19.5 | 19.0 |
| 2022-08-15 9:00 PM  | 18.4 | 18.2 | 19.0 | 18.5 |
| 2022-08-15 10:00 PM | 18.0 | 17.8 | 18.6 | 18.1 |
| 2022-08-15 11:00 PM | 17.5 | 17.2 | 18.1 | 17.6 |
| 2022-08-16 12:00 AM | 17.1 | 16.9 | 17.8 | 17.3 |
| 2022-08-16 1:00 AM  | 16.8 | 16.5 | 17.4 | 16.9 |
| 2022-08-16 2:00 AM  | 16.6 | 16.1 | 16.9 | 16.5 |
| 2022-08-16 3:00 AM  | 16.1 | 15.6 | 16.5 | 16.1 |
| 2022-08-16 4:00 AM  | 15.7 | 15.3 | 16.0 | 15.7 |
| 2022-08-16 5:00 AM  | 15.4 | 15.1 | 15.7 | 15.4 |
| 2022-08-16 6:00 AM  | 15.4 | 15.0 | 15.4 | 15.3 |
| 2022-08-16 7:00 AM  | 15.1 | 14.8 | 15.1 | 15.0 |
| 2022-08-16 8:00 AM  | 15.1 | 14.7 | 15.2 | 15.0 |
| 2022-08-16 9:00 AM  | 15.5 | 15.3 | 15.8 | 15.5 |
| 2022-08-16 10:00 AM | 16.5 | 16.5 | 16.4 | 16.5 |
| 2022-08-16 11:00 AM | 19.0 | 18.5 | 17.1 | 18.2 |
| 2022-08-16 12:00 PM | 20.6 | 19.6 | 18.1 | 19.4 |
| 2022-08-16 1:00 PM  | 21.3 | 19.9 | 19.2 | 20.1 |
| 2022-08-16 2:00 PM  | 21.3 | 19.9 | 20.5 | 20.6 |
| 2022-08-16 3:00 PM  | 20.9 | 19.9 | 24.0 | 21.6 |
| 2022-08-16 4:00 PM  | 20.4 | 19.8 | 24.7 | 21.6 |
| 2022-08-16 5:00 PM  | 20.3 | 19.9 | 23.3 | 21.2 |
| 2022-08-16 6:00 PM  | 20.2 | 19.9 | 22.5 | 20.9 |

|                     |      |      |      |      |
|---------------------|------|------|------|------|
| 2022-08-16 7:00 PM  | 19.5 | 19.2 | 20.3 | 19.7 |
| 2022-08-16 8:00 PM  | 18.9 | 18.6 | 19.5 | 19.0 |
| 2022-08-16 9:00 PM  | 18.8 | 18.5 | 19.1 | 18.8 |
| 2022-08-16 10:00 PM | 18.4 | 18.1 | 18.8 | 18.4 |
| 2022-08-16 11:00 PM | 18.0 | 17.8 | 18.4 | 18.1 |
| 2022-08-17 12:00 AM | 17.7 | 17.5 | 18.0 | 17.7 |
| 2022-08-17 1:00 AM  | 17.8 | 17.7 | 18.1 | 17.9 |
| 2022-08-17 2:00 AM  | 17.9 | 17.8 | 18.2 | 18.0 |
| 2022-08-17 3:00 AM  | 17.9 | 17.9 | 18.2 | 18.0 |
| 2022-08-17 4:00 AM  | 17.8 | 17.8 | 18.1 | 17.9 |
| 2022-08-17 5:00 AM  | 17.6 | 17.5 | 17.8 | 17.6 |
| 2022-08-17 6:00 AM  | 17.4 | 17.3 | 17.6 | 17.4 |
| 2022-08-17 7:00 AM  | 17.2 | 17.1 | 17.4 | 17.2 |
| 2022-08-17 8:00 AM  | 17.3 | 17.2 | 17.5 | 17.3 |
| 2022-08-17 9:00 AM  | 17.7 | 17.7 | 17.8 | 17.7 |
| 2022-08-17 10:00 AM | 18.1 | 18.0 | 18.0 | 18.0 |
| 2022-08-17 11:00 AM | 19.1 | 18.9 | 18.4 | 18.8 |
| 2022-08-17 12:00 PM | 20.5 | 19.9 | 18.8 | 19.7 |
| 2022-08-17 1:00 PM  | 21.1 | 20.3 | 19.7 | 20.4 |
| 2022-08-17 2:00 PM  | 21.6 | 20.6 | 20.4 | 20.9 |
| 2022-08-17 3:00 PM  | 21.7 | 20.8 | 21.2 | 21.2 |
| 2022-08-17 4:00 PM  | 21.5 | 20.9 | 23.6 | 22.0 |
| 2022-08-17 5:00 PM  | 20.9 | 20.4 | 21.3 | 20.9 |
| 2022-08-17 6:00 PM  | 20.3 | 19.8 | 20.2 | 20.1 |
| 2022-08-17 7:00 PM  | 20.2 | 19.8 | 20.1 | 20.0 |
| 2022-08-17 8:00 PM  | 19.5 | 19.2 | 19.5 | 19.4 |
| 2022-08-17 9:00 PM  | 19.1 | 18.9 | 19.1 | 19.0 |
| 2022-08-17 10:00 PM | 18.6 | 18.5 | 18.7 | 18.6 |
| 2022-08-17 11:00 PM | 18.2 | 18.1 | 18.3 | 18.2 |
| 2022-08-18 12:00 AM | 17.9 | 17.9 | 18.1 | 18.0 |
| 2022-08-18 1:00 AM  | 17.9 | 17.9 | 18.1 | 18.0 |
| 2022-08-18 2:00 AM  | 18.0 | 18.0 | 18.2 | 18.1 |
| 2022-08-18 3:00 AM  | 17.8 | 17.8 | 18.0 | 17.9 |
| 2022-08-18 4:00 AM  | 17.6 | 17.6 | 17.7 | 17.6 |
| 2022-08-18 5:00 AM  | 17.3 | 17.4 | 17.5 | 17.4 |
| 2022-08-18 6:00 AM  | 16.9 | 17.1 | 17.2 | 17.1 |
| 2022-08-18 7:00 AM  | 16.8 | 16.9 | 17.0 | 16.9 |
| 2022-08-18 8:00 AM  | 17.0 | 17.0 | 17.1 | 17.0 |
| 2022-08-18 9:00 AM  | 17.3 | 17.3 | 17.4 | 17.3 |
| 2022-08-18 10:00 AM | 18.3 | 18.2 | 17.9 | 18.1 |
| 2022-08-18 11:00 AM | 20.1 | 19.8 | 18.6 | 19.5 |
| 2022-08-18 12:00 PM | 21.7 | 20.9 | 19.8 | 20.8 |
| 2022-08-18 1:00 PM  | 23.6 | 22.0 | 21.6 | 22.4 |
| 2022-08-18 2:00 PM  | 22.8 | 21.7 | 21.8 | 22.1 |
| 2022-08-18 3:00 PM  | 21.2 | 20.6 | 20.8 | 20.9 |

|                     |      |      |      |      |
|---------------------|------|------|------|------|
| 2022-08-18 4:00 PM  | 20.6 | 20.2 | 20.1 | 20.3 |
| 2022-08-18 5:00 PM  | 20.9 | 20.5 | 20.3 | 20.6 |
| 2022-08-18 6:00 PM  | 20.3 | 20.0 | 19.9 | 20.1 |
| 2022-08-18 7:00 PM  | 20.3 | 20.0 | 19.9 | 20.1 |
| 2022-08-18 8:00 PM  | 20.1 | 19.9 | 20.0 | 20.0 |
| 2022-08-18 9:00 PM  | 19.4 | 19.3 | 19.4 | 19.4 |
| 2022-08-18 10:00 PM | 18.8 | 18.8 | 18.9 | 18.8 |
| 2022-08-18 11:00 PM | 18.5 | 18.5 | 18.6 | 18.5 |
| 2022-08-19 12:00 AM | 18.2 | 18.2 | 18.4 | 18.3 |
| 2022-08-19 1:00 AM  | 18.4 | 18.4 | 18.5 | 18.4 |
| 2022-08-19 2:00 AM  | 18.5 | 18.5 | 18.6 | 18.5 |
| 2022-08-19 3:00 AM  | 18.5 | 18.5 | 18.5 | 18.5 |
| 2022-08-19 4:00 AM  | 18.4 | 18.4 | 18.5 | 18.4 |
| 2022-08-19 5:00 AM  | 18.4 | 18.4 | 18.5 | 18.4 |
| 2022-08-19 6:00 AM  | 18.4 | 18.4 | 18.5 | 18.4 |
| 2022-08-19 7:00 AM  | 18.2 | 18.3 | 18.4 | 18.3 |
| 2022-08-19 8:00 AM  | 18.2 | 18.2 | 18.3 | 18.2 |
| 2022-08-19 9:00 AM  | 18.4 | 18.3 | 18.4 | 18.4 |
| 2022-08-19 10:00 AM | 18.6 | 18.5 | 18.6 | 18.6 |
| 2022-08-19 11:00 AM | 19.2 | 19.0 | 18.9 | 19.0 |
| 2022-08-19 12:00 PM | 20.0 | 19.6 | 19.5 | 19.7 |
| 2022-08-19 1:00 PM  | 21.2 | 20.5 | 20.3 | 20.7 |
| 2022-08-19 2:00 PM  | 21.9 | 20.8 | 21.8 | 21.5 |
| 2022-08-19 3:00 PM  | 21.6 | 20.7 | 25.1 | 22.5 |
| 2022-08-19 4:00 PM  | 21.5 | 20.9 | 26.8 | 23.1 |
| 2022-08-19 5:00 PM  | 21.8 | 21.4 | 26.4 | 23.2 |
| 2022-08-19 6:00 PM  | 21.4 | 21.0 | 22.9 | 21.8 |
| 2022-08-19 7:00 PM  | 20.9 | 20.5 | 21.6 | 21.0 |
| 2022-08-19 8:00 PM  | 20.8 | 20.4 | 21.3 | 20.8 |
| 2022-08-19 9:00 PM  | 20.2 | 20.0 | 20.8 | 20.3 |
| 2022-08-19 10:00 PM | 19.8 | 19.7 | 20.3 | 19.9 |
| 2022-08-19 11:00 PM | 19.3 | 19.3 | 19.9 | 19.5 |
| 2022-08-20 12:00 AM | 19.0 | 19.0 | 19.5 | 19.2 |
| 2022-08-20 1:00 AM  | 18.8 | 18.8 | 19.2 | 18.9 |
| 2022-08-20 2:00 AM  | 18.8 | 18.8 | 19.2 | 18.9 |
| 2022-08-20 3:00 AM  | 18.7 | 18.7 | 19.1 | 18.8 |
| 2022-08-20 4:00 AM  | 18.5 | 18.6 | 18.9 | 18.7 |
| 2022-08-20 5:00 AM  | 18.4 | 18.5 | 18.7 | 18.5 |
| 2022-08-20 6:00 AM  | 18.2 | 18.3 | 18.6 | 18.4 |
| 2022-08-20 7:00 AM  | 17.8 | 18.0 | 18.3 | 18.0 |
| 2022-08-20 8:00 AM  | 17.5 | 17.7 | 18.0 | 17.7 |
| 2022-08-20 9:00 AM  | 17.9 | 18.0 | 18.1 | 18.0 |
| 2022-08-20 10:00 AM | 18.2 | 18.3 | 18.2 | 18.2 |
| 2022-08-20 11:00 AM | 20.3 | 20.5 | 18.5 | 19.8 |
| 2022-08-20 12:00 PM | 21.6 | 21.1 | 19.5 | 20.7 |

|                     |      |      |      |      |
|---------------------|------|------|------|------|
| 2022-08-20 1:00 PM  | 21.1 | 20.5 | 19.9 | 20.5 |
| 2022-08-20 2:00 PM  | 21.7 | 20.7 | 21.1 | 21.2 |
| 2022-08-20 3:00 PM  | 21.3 | 20.4 | 24.8 | 22.2 |
| 2022-08-20 4:00 PM  | 20.6 | 20.1 | 26.2 | 22.3 |
| 2022-08-20 5:00 PM  | 20.5 | 20.2 | 25.9 | 22.2 |
| 2022-08-20 6:00 PM  | 20.5 | 20.3 | 23.9 | 21.6 |
| 2022-08-20 7:00 PM  | 20.1 | 19.8 | 21.5 | 20.5 |
| 2022-08-20 8:00 PM  | 19.2 | 19.1 | 20.3 | 19.5 |
| 2022-08-20 9:00 PM  | 18.8 | 18.7 | 19.7 | 19.1 |
| 2022-08-20 10:00 PM | 18.1 | 18.2 | 19.0 | 18.4 |
| 2022-08-20 11:00 PM | 17.7 | 17.6 | 18.4 | 17.9 |
| 2022-08-21 12:00 AM | 17.2 | 17.2 | 17.8 | 17.4 |
| 2022-08-21 1:00 AM  | 16.7 | 16.8 | 17.2 | 16.9 |
| 2022-08-21 2:00 AM  | 16.0 | 16.3 | 16.6 | 16.3 |
| 2022-08-21 3:00 AM  | 15.7 | 15.9 | 16.1 | 15.9 |
| 2022-08-21 4:00 AM  | 14.8 | 15.5 | 15.6 | 15.3 |
| 2022-08-21 5:00 AM  | 14.4 | 15.2 | 15.3 | 15.0 |
| 2022-08-21 6:00 AM  | 14.7 | 14.8 | 14.9 | 14.8 |
| 2022-08-21 7:00 AM  | 14.1 | 14.7 | 14.7 | 14.5 |
| 2022-08-21 8:00 AM  | 13.9 | 14.6 | 14.5 | 14.3 |
| 2022-08-21 9:00 AM  | 14.6 | 15.0 | 15.2 | 14.9 |
| 2022-08-21 10:00 AM | 16.1 | 16.3 | 16.1 | 16.2 |
| 2022-08-21 11:00 AM | 19.0 | 19.1 | 16.9 | 18.3 |
| 2022-08-21 12:00 PM | 20.7 | 20.4 | 18.2 | 19.8 |
| 2022-08-21 1:00 PM  | 21.6 | 20.1 | 19.4 | 20.4 |
| 2022-08-21 2:00 PM  | 21.6 | 20.3 | 21.5 | 21.1 |
| 2022-08-21 3:00 PM  | 20.8 | 19.9 | 25.4 | 22.0 |
| 2022-08-21 4:00 PM  | 20.3 | 19.8 | 26.2 | 22.1 |
| 2022-08-21 5:00 PM  | 20.3 | 20.0 | 26.7 | 22.3 |
| 2022-08-21 6:00 PM  | 20.2 | 20.0 | 24.3 | 21.5 |
| 2022-08-21 7:00 PM  | 19.6 | 19.3 | 21.1 | 20.0 |
| 2022-08-21 8:00 PM  | 19.1 | 18.9 | 20.2 | 19.4 |
| 2022-08-21 9:00 PM  | 18.7 | 18.5 | 19.6 | 18.9 |
| 2022-08-21 10:00 PM | 18.1 | 18.1 | 19.0 | 18.4 |
| 2022-08-21 11:00 PM | 17.8 | 17.8 | 18.5 | 18.0 |
| 2022-08-22 12:00 AM | 17.5 | 17.6 | 18.2 | 17.8 |
| 2022-08-22 1:00 AM  | 17.2 | 17.2 | 17.8 | 17.4 |
| 2022-08-22 2:00 AM  | 16.9 | 16.9 | 17.5 | 17.1 |
| 2022-08-22 3:00 AM  | 16.6 | 16.7 | 17.2 | 16.8 |
| 2022-08-22 4:00 AM  | 16.3 | 16.5 | 16.8 | 16.5 |
| 2022-08-22 5:00 AM  | 15.8 | 16.2 | 16.4 | 16.1 |
| 2022-08-22 6:00 AM  | 15.6 | 16.0 | 16.2 | 15.9 |
| 2022-08-22 7:00 AM  | 15.4 | 15.9 | 15.9 | 15.7 |
| 2022-08-22 8:00 AM  | 15.4 | 15.8 | 15.9 | 15.7 |
| 2022-08-22 9:00 AM  | 15.8 | 16.0 | 16.2 | 16.0 |

|                     |      |      |      |      |
|---------------------|------|------|------|------|
| 2022-08-22 10:00 AM | 17.3 | 17.2 | 17.1 | 17.2 |
| 2022-08-22 11:00 AM | 19.5 | 19.0 | 18.1 | 18.9 |
| 2022-08-22 12:00 PM | 20.7 | 20.1 | 19.1 | 20.0 |
| 2022-08-22 1:00 PM  | 22.1 | 20.5 | 20.0 | 20.9 |
| 2022-08-22 2:00 PM  | 21.5 | 20.3 | 20.4 | 20.7 |
| 2022-08-22 3:00 PM  | 21.3 | 20.2 | 22.5 | 21.3 |
| 2022-08-22 4:00 PM  | 20.6 | 19.8 | 20.8 | 20.4 |
| 2022-08-22 5:00 PM  | 19.7 | 19.2 | 19.5 | 19.5 |
| 2022-08-22 6:00 PM  | 20.0 | 19.4 | 19.8 | 19.7 |
| 2022-08-22 7:00 PM  | 20.3 | 19.7 | 20.0 | 20.0 |
| 2022-08-22 8:00 PM  | 19.9 | 19.4 | 19.8 | 19.7 |
| 2022-08-22 9:00 PM  | 19.4 | 19.1 | 19.5 | 19.3 |
| 2022-08-22 10:00 PM | 19.0 | 18.8 | 19.1 | 19.0 |
| 2022-08-22 11:00 PM | 19.0 | 18.8 | 19.1 | 19.0 |
| 2022-08-23 12:00 AM | 19.0 | 18.8 | 19.0 | 18.9 |
| 2022-08-23 1:00 AM  | 18.8 | 18.7 | 18.8 | 18.8 |
| 2022-08-23 2:00 AM  | 18.7 | 18.6 | 18.8 | 18.7 |
| 2022-08-23 3:00 AM  | 18.7 | 18.7 | 18.8 | 18.7 |
| 2022-08-23 4:00 AM  | 18.7 | 18.6 | 18.8 | 18.7 |
| 2022-08-23 5:00 AM  | 18.6 | 18.6 | 18.6 | 18.6 |
| 2022-08-23 6:00 AM  | 18.4 | 18.4 | 18.5 | 18.4 |
| 2022-08-23 7:00 AM  | 18.2 | 18.3 | 18.3 | 18.3 |
| 2022-08-23 8:00 AM  | 18.2 | 18.2 | 18.2 | 18.2 |
| 2022-08-23 9:00 AM  | 18.5 | 18.4 | 18.4 | 18.4 |
| 2022-08-23 10:00 AM | 18.9 | 18.6 | 18.6 | 18.7 |
| 2022-08-23 11:00 AM | 19.8 | 19.2 | 19.2 | 19.4 |
| 2022-08-23 12:00 PM | 20.2 | 19.6 | 19.7 | 19.8 |
| 2022-08-23 1:00 PM  | 21.1 | 20.0 | 20.3 | 20.5 |
| 2022-08-23 2:00 PM  | 22.0 | 20.7 | 21.5 | 21.4 |
| 2022-08-23 3:00 PM  | 21.8 | 20.7 | 22.2 | 21.6 |
| 2022-08-23 4:00 PM  | 21.4 | 20.6 | 23.3 | 21.8 |
| 2022-08-23 5:00 PM  | 21.4 | 20.8 | 25.9 | 22.7 |
| 2022-08-23 6:00 PM  | 21.5 | 20.9 | 24.1 | 22.2 |
| 2022-08-23 7:00 PM  | 20.8 | 20.3 | 21.6 | 20.9 |
| 2022-08-23 8:00 PM  | 20.0 | 19.8 | 20.6 | 20.1 |
| 2022-08-23 9:00 PM  | 19.3 | 19.2 | 19.9 | 19.5 |
| 2022-08-23 10:00 PM | 18.9 | 19.0 | 19.5 | 19.1 |
| 2022-08-23 11:00 PM | 18.5 | 18.5 | 18.9 | 18.6 |
| 2022-08-24 12:00 AM | 18.1 | 18.2 | 18.5 | 18.3 |
| 2022-08-24 1:00 AM  | 17.8 | 17.8 | 17.9 | 17.8 |
| 2022-08-24 2:00 AM  | 17.4 | 17.5 | 17.5 | 17.5 |
| 2022-08-24 3:00 AM  | 16.9 | 17.1 | 16.9 | 17.0 |
| 2022-08-24 4:00 AM  | 16.6 | 16.8 | 16.6 | 16.7 |
| 2022-08-24 5:00 AM  | 16.7 | 16.7 | 16.7 | 16.7 |
| 2022-08-24 6:00 AM  | 16.8 | 16.8 | 16.9 | 16.8 |

|                     |      |      |      |      |
|---------------------|------|------|------|------|
| 2022-08-24 7:00 AM  | 16.9 | 16.9 | 17.0 | 16.9 |
| 2022-08-24 8:00 AM  | 16.9 | 16.9 | 17.0 | 16.9 |
| 2022-08-24 9:00 AM  | 17.1 | 17.1 | 17.2 | 17.1 |
| 2022-08-24 10:00 AM | 17.3 | 17.3 | 17.4 | 17.3 |
| 2022-08-24 11:00 AM | 17.7 | 17.6 | 17.7 | 17.7 |
| 2022-08-24 12:00 PM | 17.9 | 17.8 | 17.9 | 17.9 |
| 2022-08-24 1:00 PM  | 18.0 | 17.9 | 18.0 | 18.0 |
| 2022-08-24 2:00 PM  | 18.1 | 18.0 | 18.0 | 18.0 |
| 2022-08-24 3:00 PM  | 18.2 | 18.0 | 18.0 | 18.1 |
| 2022-08-24 4:00 PM  | 18.3 | 18.1 | 18.0 | 18.1 |
| 2022-08-24 5:00 PM  | 18.5 | 18.2 | 18.3 | 18.3 |
| 2022-08-24 6:00 PM  | 18.6 | 18.3 | 18.4 | 18.4 |
| 2022-08-24 7:00 PM  | 18.5 | 18.2 | 18.4 | 18.4 |
| 2022-08-24 8:00 PM  | 18.2 | 18.0 | 18.2 | 18.1 |
| 2022-08-24 9:00 PM  | 17.9 | 17.8 | 17.9 | 17.9 |
| 2022-08-24 10:00 PM | 17.7 | 17.6 | 17.7 | 17.7 |
| 2022-08-24 11:00 PM | 17.6 | 17.5 | 17.6 | 17.6 |
| 2022-08-25 12:00 AM | 17.2 | 17.3 | 17.3 | 17.3 |
| 2022-08-25 1:00 AM  | 16.8 | 16.8 | 16.9 | 16.8 |
| 2022-08-25 2:00 AM  | 16.6 | 16.7 | 16.6 | 16.6 |
| 2022-08-25 3:00 AM  | 16.5 | 16.6 | 16.3 | 16.5 |
| 2022-08-25 4:00 AM  | 16.5 | 16.5 | 16.5 | 16.5 |
| 2022-08-25 5:00 AM  | 16.3 | 16.5 | 16.2 | 16.3 |
| 2022-08-25 6:00 AM  | 16.0 | 16.0 | 15.9 | 16.0 |
| 2022-08-25 7:00 AM  | 16.1 | 16.1 | 16.1 | 16.1 |
| 2022-08-25 8:00 AM  | 15.9 | 15.9 | 15.9 | 15.9 |
| 2022-08-25 9:00 AM  | 15.9 | 15.9 | 15.9 | 15.9 |
| 2022-08-25 10:00 AM | 16.7 | 16.7 | 16.4 | 16.6 |
| 2022-08-25 11:00 AM | 17.3 | 17.1 | 16.9 | 17.1 |
| 2022-08-25 12:00 PM | 18.2 | 17.8 | 17.6 | 17.9 |
| 2022-08-25 1:00 PM  | 20.1 | 18.9 | 18.9 | 19.3 |
| 2022-08-25 2:00 PM  | 20.0 | 19.1 | 19.5 | 19.5 |
| 2022-08-25 3:00 PM  | 19.7 | 19.0 | 21.4 | 20.0 |
| 2022-08-25 4:00 PM  | 19.6 | 19.0 | 20.7 | 19.8 |
| 2022-08-25 5:00 PM  | 19.4 | 18.9 | 19.4 | 19.2 |
| 2022-08-25 6:00 PM  | 19.3 | 18.8 | 19.3 | 19.1 |
| 2022-08-25 7:00 PM  | 19.1 | 18.6 | 18.9 | 18.9 |
| 2022-08-25 8:00 PM  | 18.7 | 18.3 | 18.6 | 18.5 |
| 2022-08-25 9:00 PM  | 18.2 | 18.0 | 18.2 | 18.1 |
| 2022-08-25 10:00 PM | 18.0 | 17.8 | 18.1 | 18.0 |
| 2022-08-25 11:00 PM | 17.9 | 17.7 | 17.9 | 17.8 |
| 2022-08-26 12:00 AM | 17.6 | 17.5 | 17.6 | 17.6 |
| 2022-08-26 1:00 AM  | 17.4 | 17.4 | 17.5 | 17.4 |
| 2022-08-26 2:00 AM  | 17.4 | 17.4 | 17.5 | 17.4 |
| 2022-08-26 3:00 AM  | 17.0 | 17.0 | 17.2 | 17.1 |



|                     |      |      |      |      |
|---------------------|------|------|------|------|
| 2022-08-26 4:00 AM  | 16.5 | 16.6 | 16.7 | 16.6 |
| 2022-08-26 5:00 AM  | 16.4 | 16.5 | 16.6 | 16.5 |
| 2022-08-26 6:00 AM  | 16.5 | 16.5 | 16.5 | 16.5 |
| 2022-08-26 7:00 AM  | 16.3 | 16.3 | 16.3 | 16.3 |
| 2022-08-26 8:00 AM  | 16.4 | 16.4 | 16.4 | 16.4 |
| 2022-08-26 9:00 AM  | 16.8 | 16.7 | 16.7 | 16.7 |
| 2022-08-26 10:00 AM | 17.3 | 17.2 | 17.1 | 17.2 |
| 2022-08-26 11:00 AM | 18.7 | 18.6 | 17.5 | 18.3 |
| 2022-08-26 12:00 PM | 19.5 | 19.1 | 18.4 | 19.0 |
| 2022-08-26 1:00 PM  | 20.4 | 19.4 | 19.3 | 19.7 |
| 2022-08-26 2:00 PM  | 20.8 | 19.7 | 20.6 | 20.4 |
| 2022-08-26 3:00 PM  | 20.8 | 19.8 | 22.5 | 21.0 |
| 2022-08-26 4:00 PM  | 20.6 | 19.9 | 22.5 | 21.0 |
| 2022-08-26 5:00 PM  | 20.6 | 20.1 | 23.6 | 21.4 |
| 2022-08-26 6:00 PM  | 20.6 | 20.3 | 22.5 | 21.1 |
| 2022-08-26 7:00 PM  | 20.3 | 19.9 | 21.0 | 20.4 |
| 2022-08-26 8:00 PM  | 20.1 | 19.7 | 20.6 | 20.1 |
| 2022-08-26 9:00 PM  | 19.7 | 19.3 | 20.2 | 19.7 |
| 2022-08-26 10:00 PM | 19.2 | 19.0 | 19.7 | 19.3 |
| 2022-08-26 11:00 PM | 18.9 | 18.7 | 19.3 | 19.0 |
| 2022-08-27 12:00 AM | 18.6 | 18.5 | 19.0 | 18.7 |
| 2022-08-27 1:00 AM  | 18.2 | 18.2 | 18.6 | 18.3 |
| 2022-08-27 2:00 AM  | 18.0 | 18.0 | 18.4 | 18.1 |
| 2022-08-27 3:00 AM  | 17.8 | 17.8 | 18.2 | 17.9 |
| 2022-08-27 4:00 AM  | 17.5 | 17.6 | 17.8 | 17.6 |
| 2022-08-27 5:00 AM  | 17.3 | 17.4 | 17.6 | 17.4 |
| 2022-08-27 6:00 AM  | 17.1 | 17.2 | 17.4 | 17.2 |
| 2022-08-27 7:00 AM  | 16.9 | 17.0 | 17.1 | 17.0 |
| 2022-08-27 8:00 AM  | 16.7 | 16.8 | 17.0 | 16.8 |
| 2022-08-27 9:00 AM  | 17.1 | 17.1 | 17.2 | 17.1 |
| 2022-08-27 10:00 AM | 18.1 | 18.0 | 17.9 | 18.0 |
| 2022-08-27 11:00 AM | 19.5 | 19.2 | 18.7 | 19.1 |
| 2022-08-27 12:00 PM | 20.2 | 19.6 | 19.5 | 19.8 |
| 2022-08-27 1:00 PM  | 21.0 | 20.1 | 20.1 | 20.4 |
| 2022-08-27 2:00 PM  | 20.6 | 19.9 | 20.2 | 20.2 |
| 2022-08-27 3:00 PM  | 20.5 | 19.8 | 20.1 | 20.1 |
| 2022-08-27 4:00 PM  | 20.0 | 19.5 | 19.7 | 19.7 |
| 2022-08-27 5:00 PM  | 19.5 | 19.1 | 19.2 | 19.3 |
| 2022-08-27 6:00 PM  | 19.5 | 19.1 | 19.2 | 19.3 |
| 2022-08-27 7:00 PM  | 19.3 | 19.0 | 19.1 | 19.1 |
| 2022-08-27 8:00 PM  | 19.2 | 18.9 | 19.0 | 19.0 |
| 2022-08-27 9:00 PM  | 19.1 | 18.9 | 19.0 | 19.0 |
| 2022-08-27 10:00 PM | 19.0 | 18.8 | 18.9 | 18.9 |
| 2022-08-27 11:00 PM | 18.9 | 18.8 | 18.9 | 18.9 |
| 2022-08-28 12:00 AM | 18.8 | 18.6 | 18.8 | 18.7 |

|                     |      |      |      |      |
|---------------------|------|------|------|------|
| 2022-08-28 1:00 AM  | 18.6 | 18.5 | 18.7 | 18.6 |
| 2022-08-28 2:00 AM  | 18.8 | 18.7 | 18.8 | 18.8 |
| 2022-08-28 3:00 AM  | 18.8 | 18.7 | 18.8 | 18.8 |
| 2022-08-28 4:00 AM  | 18.8 | 18.6 | 18.8 | 18.7 |
| 2022-08-28 5:00 AM  | 18.8 | 18.6 | 18.8 | 18.7 |
| 2022-08-28 6:00 AM  | 18.6 | 18.5 | 18.7 | 18.6 |
| 2022-08-28 7:00 AM  | 18.2 | 18.2 | 18.4 | 18.3 |
| 2022-08-28 8:00 AM  | 18.3 | 18.3 | 18.4 | 18.3 |
| 2022-08-28 9:00 AM  | 18.6 | 18.5 | 18.6 | 18.6 |
| 2022-08-28 10:00 AM | 18.9 | 18.7 | 18.7 | 18.8 |
| 2022-08-28 11:00 AM | 19.6 | 19.2 | 19.1 | 19.3 |
| 2022-08-28 12:00 PM | 20.3 | 19.9 | 20.0 | 20.1 |
| 2022-08-28 1:00 PM  | 20.9 | 20.3 | 20.5 | 20.6 |
| 2022-08-28 2:00 PM  | 20.5 | 20.0 | 20.3 | 20.3 |
| 2022-08-28 3:00 PM  | 20.6 | 20.1 | 20.4 | 20.4 |
| 2022-08-28 4:00 PM  | 20.9 | 20.4 | 20.7 | 20.7 |
| 2022-08-28 5:00 PM  | 20.5 | 20.0 | 20.2 | 20.2 |
| 2022-08-28 6:00 PM  | 20.3 | 19.9 | 20.0 | 20.1 |
| 2022-08-28 7:00 PM  | 20.4 | 19.9 | 20.1 | 20.1 |
| 2022-08-28 8:00 PM  | 20.2 | 19.8 | 20.0 | 20.0 |
| 2022-08-28 9:00 PM  | 19.8 | 19.5 | 19.7 | 19.7 |
| 2022-08-28 10:00 PM | 19.6 | 19.3 | 19.5 | 19.5 |
| 2022-08-28 11:00 PM | 19.3 | 19.1 | 19.3 | 19.2 |
| 2022-08-29 12:00 AM | 18.9 | 18.9 | 19.0 | 18.9 |
| 2022-08-29 1:00 AM  | 18.5 | 18.5 | 18.6 | 18.5 |
| 2022-08-29 2:00 AM  | 18.3 | 18.3 | 18.5 | 18.4 |
| 2022-08-29 3:00 AM  | 18.5 | 18.5 | 18.6 | 18.5 |
| 2022-08-29 4:00 AM  | 18.6 | 18.6 | 18.7 | 18.6 |
| 2022-08-29 5:00 AM  | 18.5 | 18.5 | 18.7 | 18.6 |
| 2022-08-29 6:00 AM  | 18.6 | 18.6 | 18.7 | 18.6 |
| 2022-08-29 7:00 AM  | 18.6 | 18.6 | 18.7 | 18.6 |
| 2022-08-29 8:00 AM  | 18.4 | 18.4 | 18.5 | 18.4 |
| 2022-08-29 9:00 AM  | 18.8 | 18.7 | 18.7 | 18.7 |
| 2022-08-29 10:00 AM | 19.0 | 18.9 | 18.8 | 18.9 |
| 2022-08-29 11:00 AM | 20.3 | 20.0 | 19.3 | 19.9 |
| 2022-08-29 12:00 PM | 21.3 | 20.4 | 20.3 | 20.7 |
| 2022-08-29 1:00 PM  | 21.5 | 20.5 | 20.7 | 20.9 |
| 2022-08-29 2:00 PM  | 21.7 | 20.6 | 22.1 | 21.5 |
| 2022-08-29 3:00 PM  | 21.0 | 20.4 | 22.8 | 21.4 |
| 2022-08-29 4:00 PM  | 20.7 | 20.2 | 23.8 | 21.6 |
| 2022-08-29 5:00 PM  | 20.8 | 20.4 | 23.9 | 21.7 |
| 2022-08-29 6:00 PM  | 20.7 | 20.3 | 22.1 | 21.0 |
| 2022-08-29 7:00 PM  | 20.4 | 20.0 | 21.1 | 20.5 |
| 2022-08-29 8:00 PM  | 20.3 | 20.0 | 20.8 | 20.4 |
| 2022-08-29 9:00 PM  | 19.6 | 19.5 | 20.1 | 19.7 |

|                     |      |      |      |      |
|---------------------|------|------|------|------|
| 2022-08-29 10:00 PM | 19.3 | 19.2 | 19.7 | 19.4 |
| 2022-08-29 11:00 PM | 19.1 | 19.1 | 19.5 | 19.2 |
| 2022-08-30 12:00 AM | 19.1 | 19.0 | 19.4 | 19.2 |
| 2022-08-30 1:00 AM  | 18.6 | 18.7 | 19.0 | 18.8 |
| 2022-08-30 2:00 AM  | 18.2 | 18.3 | 18.5 | 18.3 |
| 2022-08-30 3:00 AM  | 18.1 | 18.1 | 18.3 | 18.2 |
| 2022-08-30 4:00 AM  | 18.0 | 18.1 | 18.2 | 18.1 |
| 2022-08-30 5:00 AM  | 18.0 | 18.1 | 18.3 | 18.1 |
| 2022-08-30 6:00 AM  | 17.6 | 17.8 | 17.8 | 17.7 |
| 2022-08-30 7:00 AM  | 17.0 | 17.4 | 17.2 | 17.2 |
| 2022-08-30 8:00 AM  | 16.3 | 16.8 | 16.5 | 16.5 |
| 2022-08-30 9:00 AM  | 15.7 | 16.3 | 15.9 | 16.0 |
| 2022-08-30 10:00 AM | 15.8 | 16.2 | 15.9 | 16.0 |
| 2022-08-30 11:00 AM | 17.2 | 17.5 | 16.4 | 17.0 |
| 2022-08-30 12:00 PM | 18.4 | 18.0 | 17.2 | 17.9 |
| 2022-08-30 1:00 PM  | 19.1 | 18.3 | 18.0 | 18.5 |
| 2022-08-30 2:00 PM  | 19.3 | 18.3 | 19.1 | 18.9 |
| 2022-08-30 3:00 PM  | 19.1 | 18.0 | 20.3 | 19.1 |
| 2022-08-30 4:00 PM  | 19.2 | 18.2 | 21.3 | 19.6 |
| 2022-08-30 5:00 PM  | 19.4 | 18.5 | 21.6 | 19.8 |
| 2022-08-30 6:00 PM  | 19.0 | 18.3 | 19.5 | 18.9 |
| 2022-08-30 7:00 PM  | 18.8 | 18.2 | 18.9 | 18.6 |
| 2022-08-30 8:00 PM  | 18.5 | 18.1 | 18.6 | 18.4 |
| 2022-08-30 9:00 PM  | 18.1 | 17.9 | 18.3 | 18.1 |
| 2022-08-30 10:00 PM | 17.6 | 17.5 | 17.9 | 17.7 |
| 2022-08-30 11:00 PM | 17.2 | 17.2 | 17.6 | 17.3 |
| 2022-08-31 12:00 AM | 17.0 | 17.2 | 17.3 | 17.2 |
| 2022-08-31 1:00 AM  | 16.8 | 17.0 | 17.2 | 17.0 |
| 2022-08-31 2:00 AM  | 16.5 | 16.8 | 16.9 | 16.7 |
| 2022-08-31 3:00 AM  | 16.3 | 16.6 | 16.7 | 16.5 |
| 2022-08-31 4:00 AM  | 16.1 | 16.4 | 16.4 | 16.3 |
| 2022-08-31 5:00 AM  | 15.9 | 16.2 | 16.3 | 16.1 |
| 2022-08-31 6:00 AM  | 15.6 | 15.9 | 16.0 | 15.8 |
| 2022-08-31 7:00 AM  | 15.4 | 15.8 | 15.8 | 15.7 |
| 2022-08-31 8:00 AM  | 15.1 | 15.5 | 15.5 | 15.4 |
| 2022-08-31 9:00 AM  | 14.9 | 15.3 | 15.3 | 15.2 |
| 2022-08-31 10:00 AM | 14.8 | 15.3 | 15.0 | 15.0 |
| 2022-08-31 11:00 AM | 16.2 | 16.5 | 15.3 | 16.0 |
| 2022-08-31 12:00 PM | 17.4 | 16.9 | 16.0 | 16.8 |
| 2022-08-31 1:00 PM  | 17.7 | 17.3 | 16.5 | 17.2 |
| 2022-08-31 2:00 PM  | 17.9 | 17.1 | 17.9 | 17.6 |
| 2022-08-31 3:00 PM  | 17.2 | 16.8 | 19.7 | 17.9 |
| 2022-08-31 4:00 PM  | 17.1 | 16.5 | 20.9 | 18.2 |
| 2022-08-31 5:00 PM  | 17.3 | 16.6 | 21.2 | 18.4 |
| 2022-08-31 6:00 PM  | 17.3 | 16.8 | 19.9 | 18.0 |

|                     |      |      |      |      |
|---------------------|------|------|------|------|
| 2022-08-31 7:00 PM  | 16.8 | 16.4 | 17.7 | 17.0 |
| 2022-08-31 8:00 PM  | 16.4 | 16.1 | 17.1 | 16.5 |
| 2022-08-31 9:00 PM  | 16.3 | 16.1 | 16.8 | 16.4 |
| 2022-08-31 10:00 PM | 15.9 | 15.9 | 16.4 | 16.1 |
| 2022-08-31 11:00 PM | 15.7 | 15.7 | 16.3 | 15.9 |
| 2022-09-01 12:00 AM | 15.6 | 15.6 | 16.1 | 15.8 |
| 2022-09-01 1:00 AM  | 15.9 | 15.9 | 16.2 | 16.0 |
| 2022-09-01 2:00 AM  | 15.9 | 15.8 | 16.1 | 15.9 |
| 2022-09-01 3:00 AM  | 15.2 | 15.3 | 15.6 | 15.4 |
| 2022-09-01 4:00 AM  | 15.1 | 15.2 | 15.4 | 15.2 |
| 2022-09-01 5:00 AM  | 15.1 | 15.2 | 15.5 | 15.3 |
| 2022-09-01 6:00 AM  | 14.8 | 15.0 | 15.1 | 15.0 |
| 2022-09-01 7:00 AM  | 14.6 | 14.8 | 15.0 | 14.8 |
| 2022-09-01 8:00 AM  | 14.6 | 14.7 | 14.9 | 14.7 |
| 2022-09-01 9:00 AM  | 14.9 | 14.9 | 15.1 | 15.0 |
| 2022-09-01 10:00 AM | 15.8 | 15.7 | 15.8 | 15.8 |
| 2022-09-01 11:00 AM | 17.1 | 16.4 | 16.2 | 16.6 |
| 2022-09-01 12:00 PM | 17.8 | 16.8 | 16.8 | 17.1 |
| 2022-09-01 1:00 PM  | 18.8 | 17.4 | 17.6 | 17.9 |
| 2022-09-01 2:00 PM  | 19.2 | 17.8 | 19.7 | 18.9 |
| 2022-09-01 3:00 PM  | 18.5 | 17.5 | 21.0 | 19.0 |
| 2022-09-01 4:00 PM  | 18.2 | 17.5 | 21.3 | 19.0 |
| 2022-09-01 5:00 PM  | 18.4 | 17.8 | 22.8 | 19.7 |
| 2022-09-01 6:00 PM  | 18.6 | 18.2 | 21.9 | 19.6 |
| 2022-09-01 7:00 PM  | 18.1 | 17.7 | 19.5 | 18.4 |
| 2022-09-01 8:00 PM  | 17.8 | 17.6 | 18.8 | 18.1 |
| 2022-09-01 9:00 PM  | 17.5 | 17.4 | 18.3 | 17.7 |
| 2022-09-01 10:00 PM | 17.2 | 17.1 | 17.9 | 17.4 |
| 2022-09-01 11:00 PM | 16.8 | 16.8 | 17.5 | 17.0 |
| 2022-09-02 12:00 AM | 16.4 | 16.5 | 17.1 | 16.7 |
| 2022-09-02 1:00 AM  | 16.1 | 16.2 | 16.7 | 16.3 |
| 2022-09-02 2:00 AM  | 15.9 | 16.0 | 16.4 | 16.1 |
| 2022-09-02 3:00 AM  | 15.8 | 15.9 | 16.2 | 16.0 |
| 2022-09-02 4:00 AM  | 15.6 | 15.7 | 16.0 | 15.8 |
| 2022-09-02 5:00 AM  | 15.5 | 15.6 | 16.0 | 15.7 |
| 2022-09-02 6:00 AM  | 15.4 | 15.5 | 15.9 | 15.6 |
| 2022-09-02 7:00 AM  | 15.3 | 15.4 | 15.8 | 15.5 |
| 2022-09-02 8:00 AM  | 15.5 | 15.7 | 16.0 | 15.7 |
| 2022-09-02 9:00 AM  | 16.1 | 16.2 | 16.4 | 16.2 |
| 2022-09-02 10:00 AM | 16.7 | 16.6 | 16.8 | 16.7 |
| 2022-09-02 11:00 AM | 18.5 | 17.7 | 17.9 | 18.0 |
| 2022-09-02 12:00 PM | 18.9 | 18.1 | 18.7 | 18.6 |
| 2022-09-02 1:00 PM  | 19.2 | 18.3 | 19.1 | 18.9 |
| 2022-09-02 2:00 PM  | 20.3 | 19.1 | 21.0 | 20.1 |
| 2022-09-02 3:00 PM  | 20.6 | 19.5 | 22.4 | 20.8 |

|                     |      |      |      |      |
|---------------------|------|------|------|------|
| 2022-09-02 4:00 PM  | 20.4 | 19.5 | 21.8 | 20.6 |
| 2022-09-02 5:00 PM  | 19.8 | 19.2 | 22.2 | 20.4 |
| 2022-09-02 6:00 PM  | 19.3 | 18.9 | 21.6 | 19.9 |
| 2022-09-02 7:00 PM  | 19.0 | 18.4 | 20.0 | 19.1 |
| 2022-09-02 8:00 PM  | 18.6 | 17.8 | 19.1 | 18.5 |
| 2022-09-02 9:00 PM  | 18.2 | 17.8 | 18.6 | 18.2 |
| 2022-09-02 10:00 PM | 17.8 | 17.5 | 18.3 | 17.9 |
| 2022-09-02 11:00 PM | 17.3 | 17.1 | 17.8 | 17.4 |
| 2022-09-03 12:00 AM | 16.8 | 16.8 | 17.4 | 17.0 |
| 2022-09-03 1:00 AM  | 16.3 | 16.4 | 16.9 | 16.5 |
| 2022-09-03 2:00 AM  | 15.8 | 16.1 | 16.3 | 16.1 |
| 2022-09-03 3:00 AM  | 15.2 | 15.6 | 15.6 | 15.5 |
| 2022-09-03 4:00 AM  | 14.6 | 15.1 | 15.1 | 14.9 |
| 2022-09-03 5:00 AM  | 14.0 | 14.5 | 14.4 | 14.3 |
| 2022-09-03 6:00 AM  | 13.5 | 13.9 | 13.8 | 13.7 |
| 2022-09-03 7:00 AM  | 12.6 | 13.3 | 13.0 | 13.0 |
| 2022-09-03 8:00 AM  | 12.4 | 13.0 | 12.7 | 12.7 |
| 2022-09-03 9:00 AM  | 12.7 | 13.4 | 13.0 | 13.0 |
| 2022-09-03 10:00 AM | 13.2 | 13.7 | 13.0 | 13.3 |
| 2022-09-03 11:00 AM | 14.3 | 14.4 | 13.2 | 14.0 |
| 2022-09-03 12:00 PM | 15.7 | 14.9 | 14.1 | 14.9 |
| 2022-09-03 1:00 PM  | 16.1 | 15.3 | 15.1 | 15.5 |
| 2022-09-03 2:00 PM  | 16.4 | 15.4 | 16.9 | 16.2 |
| 2022-09-03 3:00 PM  | 16.2 | 15.5 | 19.2 | 17.0 |
| 2022-09-03 4:00 PM  | 16.1 | 15.7 | 19.6 | 17.1 |
| 2022-09-03 5:00 PM  | 16.2 | 15.9 | 21.6 | 17.9 |
| 2022-09-03 6:00 PM  | 16.1 | 16.2 | 20.1 | 17.5 |
| 2022-09-03 7:00 PM  | 15.6 | 15.6 | 17.4 | 16.2 |
| 2022-09-03 8:00 PM  | 15.3 | 15.3 | 16.4 | 15.7 |
| 2022-09-03 9:00 PM  | 14.8 | 14.8 | 15.7 | 15.1 |
| 2022-09-03 10:00 PM | 14.1 | 14.4 | 15.0 | 14.5 |
| 2022-09-03 11:00 PM | 13.6 | 14.0 | 14.3 | 14.0 |
| 2022-09-04 12:00 AM | 13.2 | 13.4 | 13.7 | 13.4 |
| 2022-09-04 1:00 AM  | 12.7 | 13.0 | 13.1 | 12.9 |
| 2022-09-04 2:00 AM  | 11.9 | 12.5 | 12.5 | 12.3 |
| 2022-09-04 3:00 AM  | 11.6 | 12.0 | 12.1 | 11.9 |
| 2022-09-04 4:00 AM  | 11.0 | 11.6 | 11.4 | 11.3 |
| 2022-09-04 5:00 AM  | 10.7 | 11.2 | 11.0 | 11.0 |
| 2022-09-04 6:00 AM  | 10.3 | 10.9 | 10.5 | 10.6 |
| 2022-09-04 7:00 AM  | 9.5  | 10.5 | 9.8  | 9.9  |
| 2022-09-04 8:00 AM  | 9.4  | 10.3 | 9.8  | 9.8  |
| 2022-09-04 9:00 AM  | 10.2 | 10.7 | 10.6 | 10.5 |
| 2022-09-04 10:00 AM | 11.2 | 11.7 | 11.5 | 11.5 |
| 2022-09-04 11:00 AM | 13.7 | 13.3 | 12.8 | 13.3 |
| 2022-09-04 12:00 PM | 15.7 | 14.4 | 14.4 | 14.8 |

|                     |      |      |      |      |
|---------------------|------|------|------|------|
| 2022-09-04 1:00 PM  | 16.2 | 14.9 | 15.5 | 15.5 |
| 2022-09-04 2:00 PM  | 16.5 | 15.2 | 17.2 | 16.3 |
| 2022-09-04 3:00 PM  | 15.8 | 15.0 | 18.7 | 16.5 |
| 2022-09-04 4:00 PM  | 15.5 | 15.0 | 18.8 | 16.4 |
| 2022-09-04 5:00 PM  | 15.4 | 15.0 | 20.4 | 16.9 |
| 2022-09-04 6:00 PM  | 15.4 | 15.3 | 19.0 | 16.6 |
| 2022-09-04 7:00 PM  | 14.9 | 14.8 | 16.5 | 15.4 |
| 2022-09-04 8:00 PM  | 14.3 | 14.4 | 15.4 | 14.7 |
| 2022-09-04 9:00 PM  | 13.7 | 13.8 | 14.6 | 14.0 |
| 2022-09-04 10:00 PM | 13.1 | 13.3 | 14.2 | 13.5 |
| 2022-09-04 11:00 PM | 12.8 | 12.9 | 13.6 | 13.1 |
| 2022-09-05 12:00 AM | 12.3 | 12.3 | 12.9 | 12.5 |
| 2022-09-05 1:00 AM  | 11.8 | 11.8 | 12.3 | 12.0 |
| 2022-09-05 2:00 AM  | 11.4 | 11.5 | 11.8 | 11.6 |
| 2022-09-05 3:00 AM  | 10.9 | 11.2 | 11.4 | 11.2 |
| 2022-09-05 4:00 AM  | 10.6 | 10.8 | 11.4 | 10.9 |
| 2022-09-05 5:00 AM  | 10.1 | 10.6 | 10.6 | 10.4 |
| 2022-09-05 6:00 AM  | 9.2  | 10.2 | 9.7  | 9.7  |
| 2022-09-05 7:00 AM  | 9.3  | 9.9  | 9.5  | 9.6  |
| 2022-09-05 8:00 AM  | 9.0  | 9.6  | 9.2  | 9.3  |
| 2022-09-05 9:00 AM  | 9.5  | 9.9  | 9.6  | 9.7  |
| 2022-09-05 10:00 AM | 10.5 | 11.0 | 10.7 | 10.7 |
| 2022-09-05 11:00 AM | 13.3 | 12.6 | 12.2 | 12.7 |
| 2022-09-05 12:00 PM | 15.1 | 13.7 | 13.6 | 14.1 |
| 2022-09-05 1:00 PM  | 15.6 | 14.3 | 15.0 | 15.0 |
| 2022-09-05 2:00 PM  | 16.1 | 14.6 | 16.8 | 15.8 |
| 2022-09-05 3:00 PM  | 15.4 | 14.5 | 18.0 | 16.0 |
| 2022-09-05 4:00 PM  | 15.2 | 14.5 | 18.2 | 16.0 |
| 2022-09-05 5:00 PM  | 15.5 | 15.0 | 20.6 | 17.0 |
| 2022-09-05 6:00 PM  | 15.5 | 15.3 | 19.4 | 16.7 |
| 2022-09-05 7:00 PM  | 15.1 | 14.8 | 16.8 | 15.6 |
| 2022-09-05 8:00 PM  | 14.7 | 14.5 | 15.9 | 15.0 |
| 2022-09-05 9:00 PM  | 14.2 | 14.1 | 15.1 | 14.5 |
| 2022-09-05 10:00 PM | 13.7 | 13.7 | 14.6 | 14.0 |
| 2022-09-05 11:00 PM | 13.4 | 13.5 | 14.3 | 13.7 |
| 2022-09-06 12:00 AM | 13.1 | 13.3 | 13.9 | 13.4 |
| 2022-09-06 1:00 AM  | 12.8 | 12.9 | 13.3 | 13.0 |
| 2022-09-06 2:00 AM  | 12.3 | 12.5 | 13.0 | 12.6 |
| 2022-09-06 3:00 AM  | 12.1 | 12.3 | 12.7 | 12.4 |
| 2022-09-06 4:00 AM  | 11.8 | 11.9 | 12.1 | 11.9 |
| 2022-09-06 5:00 AM  | 11.3 | 11.6 | 11.4 | 11.4 |
| 2022-09-06 6:00 AM  | 10.7 | 11.2 | 10.9 | 10.9 |
| 2022-09-06 7:00 AM  | 10.5 | 10.9 | 10.5 | 10.6 |
| 2022-09-06 8:00 AM  | 10.3 | 10.8 | 10.3 | 10.5 |
| 2022-09-06 9:00 AM  | 10.5 | 11.0 | 10.7 | 10.7 |

|                     |      |      |      |      |
|---------------------|------|------|------|------|
| 2022-09-06 10:00 AM | 11.7 | 11.9 | 11.9 | 11.8 |
| 2022-09-06 11:00 AM | 14.3 | 13.6 | 13.2 | 13.7 |
| 2022-09-06 12:00 PM | 16.1 | 14.6 | 14.8 | 15.2 |
| 2022-09-06 1:00 PM  | 16.5 | 15.0 | 16.0 | 15.8 |
| 2022-09-06 2:00 PM  | 17.2 | 15.8 | 17.6 | 16.9 |
| 2022-09-06 3:00 PM  | 16.5 | 15.5 | 18.0 | 16.7 |
| 2022-09-06 4:00 PM  | 16.6 | 15.7 | 18.3 | 16.9 |
| 2022-09-06 5:00 PM  | 17.0 | 16.3 | 21.0 | 18.1 |
| 2022-09-06 6:00 PM  | 17.0 | 16.7 | 20.4 | 18.0 |
| 2022-09-06 7:00 PM  | 16.7 | 16.3 | 18.3 | 17.1 |
| 2022-09-06 8:00 PM  | 16.4 | 16.0 | 17.5 | 16.6 |
| 2022-09-06 9:00 PM  | 16.0 | 15.8 | 17.0 | 16.3 |
| 2022-09-06 10:00 PM | 15.7 | 15.6 | 16.6 | 16.0 |
| 2022-09-06 11:00 PM | 15.7 | 15.5 | 16.4 | 15.9 |
| 2022-09-07 12:00 AM | 15.6 | 15.4 | 16.2 | 15.7 |
| 2022-09-07 1:00 AM  | 15.2 | 15.2 | 15.8 | 15.4 |
| 2022-09-07 2:00 AM  | 14.9 | 14.9 | 15.4 | 15.1 |
| 2022-09-07 3:00 AM  | 14.6 | 14.6 | 15.0 | 14.7 |
| 2022-09-07 4:00 AM  | 14.4 | 14.4 | 14.8 | 14.5 |
| 2022-09-07 5:00 AM  | 14.2 | 14.3 | 14.7 | 14.4 |
| 2022-09-07 6:00 AM  | 13.9 | 14.1 | 14.4 | 14.1 |
| 2022-09-07 7:00 AM  | 13.7 | 13.8 | 14.0 | 13.8 |
| 2022-09-07 8:00 AM  | 13.5 | 13.6 | 13.8 | 13.6 |
| 2022-09-07 9:00 AM  | 13.7 | 13.8 | 14.1 | 13.9 |
| 2022-09-07 10:00 AM | 14.5 | 14.5 | 14.8 | 14.6 |
| 2022-09-07 11:00 AM | 16.7 | 15.8 | 15.7 | 16.1 |
| 2022-09-07 12:00 PM | 18.1 | 16.6 | 17.1 | 17.3 |
| 2022-09-07 1:00 PM  | 18.3 | 16.9 | 18.3 | 17.8 |
| 2022-09-07 2:00 PM  | 18.8 | 17.2 | 20.1 | 18.7 |
| 2022-09-07 3:00 PM  | 17.9 | 16.8 | 20.8 | 18.5 |
| 2022-09-07 4:00 PM  | 17.7 | 16.8 | 19.9 | 18.1 |
| 2022-09-07 5:00 PM  | 17.9 | 17.2 | 23.1 | 19.4 |
| 2022-09-07 6:00 PM  | 17.8 | 17.5 | 21.9 | 19.1 |
| 2022-09-07 7:00 PM  | 17.4 | 16.9 | 19.2 | 17.8 |
| 2022-09-07 8:00 PM  | 16.9 | 16.5 | 18.0 | 17.1 |
| 2022-09-07 9:00 PM  | 16.2 | 15.9 | 17.2 | 16.4 |
| 2022-09-07 10:00 PM | 15.6 | 15.5 | 16.5 | 15.9 |
| 2022-09-07 11:00 PM | 15.1 | 15.1 | 15.8 | 15.3 |
| 2022-09-08 12:00 AM | 14.6 | 14.6 | 15.3 | 14.8 |
| 2022-09-08 1:00 AM  | 14.1 | 14.2 | 14.8 | 14.4 |
| 2022-09-08 2:00 AM  | 13.5 | 13.7 | 14.4 | 13.9 |
| 2022-09-08 3:00 AM  | 13.2 | 13.4 | 14.0 | 13.5 |
| 2022-09-08 4:00 AM  | 12.9 | 13.1 | 13.5 | 13.2 |
| 2022-09-08 5:00 AM  | 12.6 | 12.8 | 12.9 | 12.8 |
| 2022-09-08 6:00 AM  | 12.3 | 12.5 | 12.8 | 12.5 |

|                     |      |      |      |      |
|---------------------|------|------|------|------|
| 2022-09-08 7:00 AM  | 12.4 | 12.6 | 12.8 | 12.6 |
| 2022-09-08 8:00 AM  | 12.6 | 12.7 | 12.7 | 12.7 |
| 2022-09-08 9:00 AM  | 13.1 | 13.2 | 13.3 | 13.2 |
| 2022-09-08 10:00 AM | 14.5 | 14.3 | 14.5 | 14.4 |
| 2022-09-08 11:00 AM | 16.1 | 15.4 | 15.4 | 15.6 |
| 2022-09-08 12:00 PM | 17.7 | 16.4 | 16.7 | 16.9 |
| 2022-09-08 1:00 PM  | 18.1 | 16.9 | 17.9 | 17.6 |
| 2022-09-08 2:00 PM  | 18.4 | 17.4 | 18.4 | 18.1 |
| 2022-09-08 3:00 PM  | 18.2 | 17.4 | 18.2 | 17.9 |
| 2022-09-08 4:00 PM  | 18.6 | 17.8 | 18.7 | 18.4 |
| 2022-09-08 5:00 PM  | 18.5 | 17.7 | 18.5 | 18.2 |
| 2022-09-08 6:00 PM  | 18.4 | 17.6 | 18.3 | 18.1 |
| 2022-09-08 7:00 PM  | 18.2 | 17.5 | 18.0 | 17.9 |
| 2022-09-08 8:00 PM  | 18.0 | 17.4 | 17.8 | 17.7 |
| 2022-09-08 9:00 PM  | 17.7 | 17.2 | 17.6 | 17.5 |
| 2022-09-08 10:00 PM | 17.7 | 17.2 | 17.6 | 17.5 |
| 2022-09-08 11:00 PM | 17.7 | 17.2 | 17.6 | 17.5 |
| 2022-09-09 12:00 AM | 17.7 | 17.3 | 17.6 | 17.5 |
| 2022-09-09 1:00 AM  | 17.6 | 17.2 | 17.6 | 17.5 |
| 2022-09-09 2:00 AM  | 17.6 | 17.2 | 17.6 | 17.5 |
| 2022-09-09 3:00 AM  | 17.6 | 17.3 | 17.6 | 17.5 |
| 2022-09-09 4:00 AM  | 17.7 | 17.3 | 17.7 | 17.6 |
| 2022-09-09 5:00 AM  | 17.5 | 17.2 | 17.5 | 17.4 |
| 2022-09-09 6:00 AM  | 17.4 | 17.2 | 17.5 | 17.4 |
| 2022-09-09 7:00 AM  | 17.3 | 17.1 | 17.4 | 17.3 |
| 2022-09-09 8:00 AM  | 17.1 | 16.9 | 17.1 | 17.0 |
| 2022-09-09 9:00 AM  | 16.9 | 16.8 | 17.0 | 16.9 |
| 2022-09-09 10:00 AM | 16.8 | 16.7 | 16.9 | 16.8 |
| 2022-09-09 11:00 AM | 16.7 | 16.7 | 16.8 | 16.7 |
| 2022-09-09 12:00 PM | 16.5 | 16.4 | 16.6 | 16.5 |
| 2022-09-09 1:00 PM  | 16.2 | 16.2 | 16.3 | 16.2 |
| 2022-09-09 2:00 PM  | 16.1 | 16.2 | 16.2 | 16.2 |
| 2022-09-09 3:00 PM  | 16.3 | 16.3 | 16.2 | 16.3 |
| 2022-09-09 4:00 PM  | 16.4 | 16.4 | 16.2 | 16.3 |
| 2022-09-09 5:00 PM  | 16.4 | 16.3 | 16.2 | 16.3 |
| 2022-09-09 6:00 PM  | 16.2 | 16.1 | 16.1 | 16.1 |
| 2022-09-09 7:00 PM  | 16.2 | 16.1 | 16.1 | 16.1 |
| 2022-09-09 8:00 PM  | 16.0 | 15.9 | 15.9 | 15.9 |
| 2022-09-09 9:00 PM  | 15.7 | 15.7 | 15.7 | 15.7 |
| 2022-09-09 10:00 PM | 15.5 | 15.6 | 15.6 | 15.6 |
| 2022-09-09 11:00 PM | 15.5 | 15.5 | 15.5 | 15.5 |
| 2022-09-10 12:00 AM | 15.4 | 15.4 | 15.4 | 15.4 |
| 2022-09-10 1:00 AM  | 15.3 | 15.3 | 15.3 | 15.3 |
| 2022-09-10 2:00 AM  | 15.2 | 15.2 | 15.3 | 15.2 |
| 2022-09-10 3:00 AM  | 15.2 | 15.2 | 15.2 | 15.2 |



|                     |      |      |      |      |
|---------------------|------|------|------|------|
| 2022-09-10 4:00 AM  | 14.9 | 15.0 | 15.0 | 15.0 |
| 2022-09-10 5:00 AM  | 14.8 | 15.0 | 15.0 | 14.9 |
| 2022-09-10 6:00 AM  | 14.4 | 14.5 | 14.6 | 14.5 |
| 2022-09-10 7:00 AM  | 14.3 | 14.5 | 14.5 | 14.4 |
| 2022-09-10 8:00 AM  | 14.0 | 14.2 | 14.3 | 14.2 |
| 2022-09-10 9:00 AM  | 14.3 | 14.4 | 14.3 | 14.3 |
| 2022-09-10 10:00 AM | 14.9 | 14.9 | 14.9 | 14.9 |
| 2022-09-10 11:00 AM | 15.4 | 15.3 | 15.3 | 15.3 |
| 2022-09-10 12:00 PM | 15.9 | 15.6 | 15.7 | 15.7 |
| 2022-09-10 1:00 PM  | 16.5 | 16.0 | 16.3 | 16.3 |
| 2022-09-10 2:00 PM  | 16.8 | 16.2 | 16.6 | 16.5 |
| 2022-09-10 3:00 PM  | 17.0 | 16.4 | 17.2 | 16.9 |
| 2022-09-10 4:00 PM  | 16.8 | 16.4 | 17.7 | 17.0 |
| 2022-09-10 5:00 PM  | 16.8 | 16.5 | 18.3 | 17.2 |
| 2022-09-10 6:00 PM  | 16.4 | 16.5 | 18.8 | 17.2 |
| 2022-09-10 7:00 PM  | 16.2 | 16.1 | 17.1 | 16.5 |
| 2022-09-10 8:00 PM  | 15.7 | 15.7 | 16.3 | 15.9 |
| 2022-09-10 9:00 PM  | 15.1 | 15.2 | 15.7 | 15.3 |
| 2022-09-10 10:00 PM | 14.7 | 14.7 | 15.2 | 14.9 |
| 2022-09-10 11:00 PM | 14.3 | 14.3 | 14.7 | 14.4 |
| 2022-09-11 12:00 AM | 13.9 | 14.1 | 14.2 | 14.1 |
| 2022-09-11 1:00 AM  | 13.5 | 13.8 | 13.9 | 13.7 |
| 2022-09-11 2:00 AM  | 13.2 | 13.4 | 13.6 | 13.4 |
| 2022-09-11 3:00 AM  | 12.7 | 12.9 | 12.9 | 12.8 |
| 2022-09-11 4:00 AM  | 12.3 | 12.5 | 12.4 | 12.4 |
| 2022-09-11 5:00 AM  | 11.9 | 12.1 | 12.1 | 12.0 |
| 2022-09-11 6:00 AM  | 11.7 | 11.9 | 11.8 | 11.8 |
| 2022-09-11 7:00 AM  | 11.3 | 11.6 | 11.4 | 11.4 |
| 2022-09-11 8:00 AM  | 11.1 | 11.5 | 11.3 | 11.3 |
| 2022-09-11 9:00 AM  | 11.2 | 11.5 | 11.4 | 11.4 |
| 2022-09-11 10:00 AM | 12.1 | 12.4 | 12.3 | 12.3 |
| 2022-09-11 11:00 AM | 14.2 | 13.8 | 13.4 | 13.8 |
| 2022-09-11 12:00 PM | 15.9 | 14.7 | 14.8 | 15.1 |
| 2022-09-11 1:00 PM  | 16.2 | 15.0 | 15.9 | 15.7 |
| 2022-09-11 2:00 PM  | 16.5 | 15.4 | 18.0 | 16.6 |
| 2022-09-11 3:00 PM  | 16.4 | 15.4 | 18.6 | 16.8 |
| 2022-09-11 4:00 PM  | 16.0 | 15.5 | 17.3 | 16.3 |
| 2022-09-11 5:00 PM  | 16.1 | 15.7 | 19.5 | 17.1 |
| 2022-09-11 6:00 PM  | 16.2 | 16.0 | 19.1 | 17.1 |
| 2022-09-11 7:00 PM  | 15.9 | 15.6 | 17.1 | 16.2 |
| 2022-09-11 8:00 PM  | 15.5 | 15.2 | 16.3 | 15.7 |
| 2022-09-11 9:00 PM  | 14.9 | 14.7 | 15.6 | 15.1 |
| 2022-09-11 10:00 PM | 14.5 | 14.4 | 15.1 | 14.7 |
| 2022-09-11 11:00 PM | 14.0 | 14.0 | 14.5 | 14.2 |
| 2022-09-12 12:00 AM | 13.5 | 13.6 | 13.9 | 13.7 |

|                     |      |      |      |      |
|---------------------|------|------|------|------|
| 2022-09-12 1:00 AM  | 13.0 | 13.1 | 13.4 | 13.2 |
| 2022-09-12 2:00 AM  | 12.6 | 12.8 | 12.8 | 12.7 |
| 2022-09-12 3:00 AM  | 12.1 | 12.3 | 12.2 | 12.2 |
| 2022-09-12 4:00 AM  | 11.7 | 11.9 | 11.9 | 11.8 |
| 2022-09-12 5:00 AM  | 11.5 | 11.7 | 11.7 | 11.6 |
| 2022-09-12 6:00 AM  | 11.3 | 11.5 | 11.4 | 11.4 |
| 2022-09-12 7:00 AM  | 11.0 | 11.2 | 11.2 | 11.1 |
| 2022-09-12 8:00 AM  | 10.7 | 11.0 | 11.0 | 10.9 |
| 2022-09-12 9:00 AM  | 10.9 | 11.2 | 11.1 | 11.1 |
| 2022-09-12 10:00 AM | 12.1 | 12.2 | 12.1 | 12.1 |
| 2022-09-12 11:00 AM | 14.0 | 13.5 | 13.1 | 13.5 |
| 2022-09-12 12:00 PM | 15.4 | 14.3 | 14.5 | 14.7 |
| 2022-09-12 1:00 PM  | 15.9 | 14.6 | 16.1 | 15.5 |
| 2022-09-12 2:00 PM  | 16.5 | 15.3 | 18.5 | 16.8 |
| 2022-09-12 3:00 PM  | 16.1 | 15.2 | 18.7 | 16.7 |
| 2022-09-12 4:00 PM  | 16.0 | 15.3 | 17.1 | 16.1 |
| 2022-09-12 5:00 PM  | 16.3 | 15.7 | 19.2 | 17.1 |
| 2022-09-12 6:00 PM  | 16.4 | 16.0 | 19.0 | 17.1 |
| 2022-09-12 7:00 PM  | 16.0 | 15.7 | 17.3 | 16.3 |
| 2022-09-12 8:00 PM  | 15.7 | 15.4 | 16.6 | 15.9 |
| 2022-09-12 9:00 PM  | 15.3 | 15.1 | 16.0 | 15.5 |
| 2022-09-12 10:00 PM | 14.8 | 14.6 | 15.4 | 14.9 |
| 2022-09-12 11:00 PM | 14.4 | 14.3 | 14.9 | 14.5 |
| 2022-09-13 12:00 AM | 14.1 | 14.0 | 14.5 | 14.2 |
| 2022-09-13 1:00 AM  | 13.7 | 13.7 | 14.2 | 13.9 |
| 2022-09-13 2:00 AM  | 13.3 | 13.4 | 13.8 | 13.5 |
| 2022-09-13 3:00 AM  | 12.9 | 13.1 | 13.3 | 13.1 |
| 2022-09-13 4:00 AM  | 12.5 | 12.7 | 12.8 | 12.7 |
| 2022-09-13 5:00 AM  | 12.4 | 12.5 | 12.6 | 12.5 |
| 2022-09-13 6:00 AM  | 12.0 | 12.2 | 12.4 | 12.2 |
| 2022-09-13 7:00 AM  | 12.1 | 12.2 | 12.3 | 12.2 |
| 2022-09-13 8:00 AM  | 11.9 | 12.2 | 12.2 | 12.1 |
| 2022-09-13 9:00 AM  | 12.6 | 12.7 | 12.8 | 12.7 |
| 2022-09-13 10:00 AM | 13.5 | 13.5 | 13.5 | 13.5 |
| 2022-09-13 11:00 AM | 15.4 | 14.8 | 14.2 | 14.8 |
| 2022-09-13 12:00 PM | 16.2 | 15.2 | 14.9 | 15.4 |
| 2022-09-13 1:00 PM  | 16.1 | 15.1 | 15.6 | 15.6 |
| 2022-09-13 2:00 PM  | 16.1 | 15.2 | 16.6 | 16.0 |
| 2022-09-13 3:00 PM  | 15.8 | 15.0 | 16.6 | 15.8 |
| 2022-09-13 4:00 PM  | 15.6 | 15.0 | 15.9 | 15.5 |
| 2022-09-13 5:00 PM  | 15.4 | 14.9 | 15.4 | 15.2 |
| 2022-09-13 6:00 PM  | 15.1 | 14.6 | 14.9 | 14.9 |
| 2022-09-13 7:00 PM  | 14.9 | 14.5 | 14.7 | 14.7 |
| 2022-09-13 8:00 PM  | 14.5 | 14.3 | 14.4 | 14.4 |
| 2022-09-13 9:00 PM  | 13.7 | 13.6 | 13.8 | 13.7 |

|                     |      |      |      |      |
|---------------------|------|------|------|------|
| 2022-09-13 10:00 PM | 13.3 | 13.4 | 13.4 | 13.4 |
| 2022-09-13 11:00 PM | 12.9 | 13.3 | 12.7 | 13.0 |
| 2022-09-14 12:00 AM | 12.4 | 12.7 | 12.4 | 12.5 |
| 2022-09-14 1:00 AM  | 11.7 | 11.9 | 11.8 | 11.8 |
| 2022-09-14 2:00 AM  | 11.3 | 11.5 | 11.4 | 11.4 |
| 2022-09-14 3:00 AM  | 11.1 | 11.3 | 11.0 | 11.1 |
| 2022-09-14 4:00 AM  | 10.7 | 11.1 | 11.0 | 10.9 |
| 2022-09-14 5:00 AM  | 10.2 | 10.6 | 10.3 | 10.4 |
| 2022-09-14 6:00 AM  | 9.8  | 10.2 | 9.9  | 10.0 |
| 2022-09-14 7:00 AM  | 9.2  | 9.8  | 9.5  | 9.5  |
| 2022-09-14 8:00 AM  | 8.9  | 9.6  | 9.2  | 9.2  |
| 2022-09-14 9:00 AM  | 9.2  | 9.7  | 9.2  | 9.4  |
| 2022-09-14 10:00 AM | 10.2 | 10.5 | 10.2 | 10.3 |
| 2022-09-14 11:00 AM | 12.9 | 12.3 | 11.4 | 12.2 |
| 2022-09-14 12:00 PM | 14.3 | 13.0 | 12.5 | 13.3 |
| 2022-09-14 1:00 PM  | 14.7 | 13.2 | 13.6 | 13.8 |
| 2022-09-14 2:00 PM  | 14.8 | 13.5 | 14.8 | 14.4 |
| 2022-09-14 3:00 PM  | 14.1 | 13.3 | 15.2 | 14.2 |
| 2022-09-14 4:00 PM  | 13.7 | 13.2 | 14.1 | 13.7 |
| 2022-09-14 5:00 PM  | 13.7 | 13.5 | 17.1 | 14.8 |
| 2022-09-14 6:00 PM  | 13.6 | 13.5 | 16.1 | 14.4 |
| 2022-09-14 7:00 PM  | 13.1 | 13.1 | 14.0 | 13.4 |
| 2022-09-14 8:00 PM  | 13.0 | 13.0 | 13.5 | 13.2 |
| 2022-09-14 9:00 PM  | 12.6 | 12.6 | 12.9 | 12.7 |
| 2022-09-14 10:00 PM | 12.0 | 12.0 | 12.2 | 12.1 |
| 2022-09-14 11:00 PM | 11.5 | 11.7 | 12.0 | 11.7 |
| 2022-09-15 12:00 AM | 11.2 | 11.3 | 11.5 | 11.3 |
| 2022-09-15 1:00 AM  | 11.1 | 11.4 | 11.2 | 11.2 |
| 2022-09-15 2:00 AM  | 11.3 | 11.7 | 11.5 | 11.5 |
| 2022-09-15 3:00 AM  | 11.6 | 12.0 | 11.8 | 11.8 |
| 2022-09-15 4:00 AM  | 11.9 | 12.1 | 12.0 | 12.0 |
| 2022-09-15 5:00 AM  | 12.1 | 12.2 | 12.2 | 12.2 |
| 2022-09-15 6:00 AM  | 12.2 | 12.4 | 12.3 | 12.3 |
| 2022-09-15 7:00 AM  | 12.3 | 12.4 | 12.4 | 12.4 |
| 2022-09-15 8:00 AM  | 12.3 | 12.4 | 12.4 | 12.4 |
| 2022-09-15 9:00 AM  | 12.6 | 12.6 | 12.7 | 12.6 |
| 2022-09-15 10:00 AM | 12.7 | 12.6 | 12.7 | 12.7 |
| 2022-09-15 11:00 AM | 12.8 | 12.8 | 12.9 | 12.8 |
| 2022-09-15 12:00 PM | 13.0 | 12.9 | 13.1 | 13.0 |
| 2022-09-15 1:00 PM  | 13.3 | 13.1 | 13.3 | 13.2 |
| 2022-09-15 2:00 PM  | 13.4 | 13.2 | 13.5 | 13.4 |
| 2022-09-15 3:00 PM  | 13.6 | 13.4 | 13.6 | 13.5 |
| 2022-09-15 4:00 PM  | 13.7 | 13.5 | 13.8 | 13.7 |
| 2022-09-15 5:00 PM  | 13.7 | 13.5 | 13.8 | 13.7 |
| 2022-09-15 6:00 PM  | 13.9 | 13.6 | 14.0 | 13.8 |

|                     |      |      |      |      |
|---------------------|------|------|------|------|
| 2022-09-15 7:00 PM  | 13.9 | 13.6 | 14.0 | 13.8 |
| 2022-09-15 8:00 PM  | 13.9 | 13.6 | 14.0 | 13.8 |
| 2022-09-15 9:00 PM  | 13.9 | 13.6 | 13.9 | 13.8 |
| 2022-09-15 10:00 PM | 13.9 | 13.7 | 13.9 | 13.8 |
| 2022-09-15 11:00 PM | 13.9 | 13.7 | 14.0 | 13.9 |
| 2022-09-16 12:00 AM | 13.9 | 13.7 | 13.9 | 13.8 |
| 2022-09-16 1:00 AM  | 13.8 | 13.7 | 13.9 | 13.8 |
| 2022-09-16 2:00 AM  | 13.8 | 13.7 | 13.9 | 13.8 |
| 2022-09-16 3:00 AM  | 13.7 | 13.6 | 13.7 | 13.7 |
| 2022-09-16 4:00 AM  | 13.5 | 13.5 | 13.5 | 13.5 |
| 2022-09-16 5:00 AM  | 13.3 | 13.4 | 13.3 | 13.3 |
| 2022-09-16 6:00 AM  | 13.3 | 13.3 | 13.2 | 13.3 |
| 2022-09-16 7:00 AM  | 13.1 | 13.3 | 13.1 | 13.2 |
| 2022-09-16 8:00 AM  | 12.9 | 13.1 | 12.8 | 12.9 |
| 2022-09-16 9:00 AM  | 12.9 | 13.1 | 12.7 | 12.9 |
| 2022-09-16 10:00 AM | 13.0 | 13.1 | 12.8 | 13.0 |
| 2022-09-16 11:00 AM | 13.1 | 13.2 | 12.9 | 13.1 |
| 2022-09-16 12:00 PM | 13.2 | 13.2 | 13.0 | 13.1 |
| 2022-09-16 1:00 PM  | 13.3 | 13.3 | 13.1 | 13.2 |
| 2022-09-16 2:00 PM  | 13.4 | 13.4 | 13.2 | 13.3 |
| 2022-09-16 3:00 PM  | 13.4 | 13.3 | 13.2 | 13.3 |
| 2022-09-16 4:00 PM  | 13.4 | 13.3 | 13.2 | 13.3 |
| 2022-09-16 5:00 PM  | 13.4 | 13.3 | 13.2 | 13.3 |
| 2022-09-16 6:00 PM  | 13.4 | 13.3 | 13.2 | 13.3 |
| 2022-09-16 7:00 PM  | 13.4 | 13.3 | 13.3 | 13.3 |
| 2022-09-16 8:00 PM  | 13.3 | 13.3 | 13.3 | 13.3 |
| 2022-09-16 9:00 PM  | 13.4 | 13.3 | 13.4 | 13.4 |
| 2022-09-16 10:00 PM | 13.5 | 13.4 | 13.5 | 13.5 |
| 2022-09-16 11:00 PM | 13.6 | 13.5 | 13.6 | 13.6 |
| 2022-09-17 12:00 AM | 13.7 | 13.5 | 13.7 | 13.6 |
| 2022-09-17 1:00 AM  | 13.7 | 13.6 | 13.9 | 13.7 |
| 2022-09-17 2:00 AM  | 13.9 | 13.7 | 13.9 | 13.8 |
| 2022-09-17 3:00 AM  | 13.9 | 13.7 | 14.0 | 13.9 |
| 2022-09-17 4:00 AM  | 13.9 | 13.7 | 14.0 | 13.9 |
| 2022-09-17 5:00 AM  | 14.0 | 13.8 | 14.0 | 13.9 |
| 2022-09-17 6:00 AM  | 14.0 | 13.8 | 14.0 | 13.9 |
| 2022-09-17 7:00 AM  | 14.0 | 13.9 | 14.0 | 14.0 |
| 2022-09-17 8:00 AM  | 14.0 | 13.9 | 14.1 | 14.0 |
| 2022-09-17 9:00 AM  | 14.2 | 14.0 | 14.2 | 14.1 |
| 2022-09-17 10:00 AM | 14.4 | 14.2 | 14.5 | 14.4 |
| 2022-09-17 11:00 AM | 14.7 | 14.4 | 14.7 | 14.6 |
| 2022-09-17 12:00 PM | 15.0 | 14.6 | 15.0 | 14.9 |
| 2022-09-17 1:00 PM  | 15.4 | 14.9 | 15.4 | 15.2 |
| 2022-09-17 2:00 PM  | 15.8 | 15.2 | 15.7 | 15.6 |
| 2022-09-17 3:00 PM  | 15.9 | 15.3 | 15.8 | 15.7 |

|                     |      |      |      |      |
|---------------------|------|------|------|------|
| 2022-09-17 4:00 PM  | 15.8 | 15.3 | 15.8 | 15.6 |
| 2022-09-17 5:00 PM  | 15.8 | 15.2 | 15.7 | 15.6 |
| 2022-09-17 6:00 PM  | 15.7 | 15.2 | 15.7 | 15.5 |
| 2022-09-17 7:00 PM  | 15.6 | 15.2 | 15.6 | 15.5 |
| 2022-09-17 8:00 PM  | 15.5 | 15.1 | 15.4 | 15.3 |
| 2022-09-17 9:00 PM  | 15.4 | 15.1 | 15.4 | 15.3 |
| 2022-09-17 10:00 PM | 15.4 | 15.1 | 15.4 | 15.3 |
| 2022-09-17 11:00 PM | 15.4 | 15.1 | 15.4 | 15.3 |
| 2022-09-18 12:00 AM | 15.4 | 15.1 | 15.4 | 15.3 |
| 2022-09-18 1:00 AM  | 15.4 | 15.1 | 15.4 | 15.3 |
| 2022-09-18 2:00 AM  | 15.4 | 15.1 | 15.4 | 15.3 |
| 2022-09-18 3:00 AM  | 15.4 | 15.1 | 15.4 | 15.3 |
| 2022-09-18 4:00 AM  | 15.3 | 15.1 | 15.4 | 15.3 |
| 2022-09-18 5:00 AM  | 15.3 | 15.1 | 15.4 | 15.3 |
| 2022-09-18 6:00 AM  | 15.3 | 15.1 | 15.4 | 15.3 |
| 2022-09-18 7:00 AM  | 15.3 | 15.1 | 15.4 | 15.3 |
| 2022-09-18 8:00 AM  | 15.3 | 15.1 | 15.3 | 15.2 |
| 2022-09-18 9:00 AM  | 15.3 | 15.1 | 15.3 | 15.2 |
| 2022-09-18 10:00 AM | 15.3 | 15.2 | 15.4 | 15.3 |
| 2022-09-18 11:00 AM | 15.7 | 15.3 | 15.6 | 15.5 |
| 2022-09-18 12:00 PM | 15.8 | 15.5 | 15.8 | 15.7 |
| 2022-09-18 1:00 PM  | 16.5 | 15.9 | 16.5 | 16.3 |
| 2022-09-18 2:00 PM  | 17.2 | 16.4 | 17.2 | 16.9 |
| 2022-09-18 3:00 PM  | 17.3 | 16.5 | 17.4 | 17.1 |
| 2022-09-18 4:00 PM  | 17.4 | 16.6 | 17.6 | 17.2 |
| 2022-09-18 5:00 PM  | 17.2 | 16.6 | 17.2 | 17.0 |
| 2022-09-18 6:00 PM  | 17.3 | 16.7 | 17.2 | 17.1 |
| 2022-09-18 7:00 PM  | 17.2 | 16.7 | 17.0 | 17.0 |
| 2022-09-18 8:00 PM  | 16.8 | 16.4 | 16.7 | 16.6 |
| 2022-09-18 9:00 PM  | 16.5 | 16.1 | 16.4 | 16.3 |
| 2022-09-18 10:00 PM | 16.0 | 15.8 | 16.0 | 15.9 |
| 2022-09-18 11:00 PM | 15.4 | 15.4 | 15.4 | 15.4 |
| 2022-09-19 12:00 AM | 15.0 | 15.0 | 15.0 | 15.0 |
| 2022-09-19 1:00 AM  | 14.7 | 14.7 | 14.7 | 14.7 |
| 2022-09-19 2:00 AM  | 14.4 | 14.5 | 14.3 | 14.4 |
| 2022-09-19 3:00 AM  | 14.1 | 14.3 | 14.1 | 14.2 |
| 2022-09-19 4:00 AM  | 13.9 | 14.1 | 13.9 | 14.0 |
| 2022-09-19 5:00 AM  | 14.0 | 14.1 | 13.8 | 14.0 |
| 2022-09-19 6:00 AM  | 13.7 | 13.9 | 13.6 | 13.7 |
| 2022-09-19 7:00 AM  | 13.5 | 13.7 | 13.5 | 13.6 |
| 2022-09-19 8:00 AM  | 13.4 | 13.6 | 13.3 | 13.4 |
| 2022-09-19 9:00 AM  | 13.5 | 13.7 | 13.4 | 13.5 |
| 2022-09-19 10:00 AM | 14.3 | 14.3 | 14.1 | 14.2 |
| 2022-09-19 11:00 AM | 16.2 | 15.4 | 14.9 | 15.5 |
| 2022-09-19 12:00 PM | 17.3 | 16.0 | 15.8 | 16.4 |

|                     |      |      |      |      |
|---------------------|------|------|------|------|
| 2022-09-19 1:00 PM  | 17.2 | 16.1 | 16.8 | 16.7 |
| 2022-09-19 2:00 PM  | 17.4 | 16.3 | 20.0 | 17.9 |
| 2022-09-19 3:00 PM  | 17.2 | 16.4 | 19.5 | 17.7 |
| 2022-09-19 4:00 PM  | 17.3 | 16.5 | 18.3 | 17.4 |
| 2022-09-19 5:00 PM  | 17.6 | 16.8 | 19.1 | 17.8 |
| 2022-09-19 6:00 PM  | 17.3 | 16.7 | 18.3 | 17.4 |
| 2022-09-19 7:00 PM  | 16.7 | 16.3 | 17.3 | 16.8 |
| 2022-09-19 8:00 PM  | 16.4 | 16.1 | 16.8 | 16.4 |
| 2022-09-19 9:00 PM  | 15.9 | 15.8 | 16.2 | 16.0 |
| 2022-09-19 10:00 PM | 15.6 | 15.5 | 15.9 | 15.7 |
| 2022-09-19 11:00 PM | 15.4 | 15.4 | 15.7 | 15.5 |
| 2022-09-20 12:00 AM | 15.5 | 15.4 | 15.7 | 15.5 |
| 2022-09-20 1:00 AM  | 15.5 | 15.5 | 15.7 | 15.6 |
| 2022-09-20 2:00 AM  | 15.5 | 15.4 | 15.6 | 15.5 |
| 2022-09-20 3:00 AM  | 15.3 | 15.3 | 15.5 | 15.4 |
| 2022-09-20 4:00 AM  | 15.4 | 15.4 | 15.6 | 15.5 |
| 2022-09-20 5:00 AM  | 15.3 | 15.4 | 15.5 | 15.4 |
| 2022-09-20 6:00 AM  | 15.1 | 15.2 | 15.3 | 15.2 |
| 2022-09-20 7:00 AM  | 15.3 | 15.3 | 15.5 | 15.4 |
| 2022-09-20 8:00 AM  | 15.4 | 15.4 | 15.5 | 15.4 |
| 2022-09-20 9:00 AM  | 15.5 | 15.4 | 15.6 | 15.5 |
| 2022-09-20 10:00 AM | 15.8 | 15.6 | 15.8 | 15.7 |
| 2022-09-20 11:00 AM | 16.3 | 15.9 | 16.3 | 16.2 |
| 2022-09-20 12:00 PM | 17.2 | 16.3 | 16.8 | 16.8 |
| 2022-09-20 1:00 PM  | 17.5 | 16.4 | 17.7 | 17.2 |
| 2022-09-20 2:00 PM  | 17.7 | 16.8 | 20.8 | 18.4 |
| 2022-09-20 3:00 PM  | 17.6 | 16.8 | 20.2 | 18.2 |
| 2022-09-20 4:00 PM  | 17.8 | 17.0 | 18.8 | 17.9 |
| 2022-09-20 5:00 PM  | 17.8 | 17.1 | 18.3 | 17.7 |
| 2022-09-20 6:00 PM  | 17.4 | 16.9 | 17.8 | 17.4 |
| 2022-09-20 7:00 PM  | 17.5 | 16.9 | 17.8 | 17.4 |
| 2022-09-20 8:00 PM  | 17.3 | 16.9 | 17.7 | 17.3 |
| 2022-09-20 9:00 PM  | 17.0 | 16.7 | 17.3 | 17.0 |
| 2022-09-20 10:00 PM | 16.5 | 16.4 | 16.8 | 16.6 |
| 2022-09-20 11:00 PM | 16.6 | 16.4 | 16.8 | 16.6 |
| 2022-09-21 12:00 AM | 16.6 | 16.4 | 16.8 | 16.6 |
| 2022-09-21 1:00 AM  | 16.4 | 16.3 | 16.7 | 16.5 |
| 2022-09-21 2:00 AM  | 16.3 | 16.2 | 16.5 | 16.3 |
| 2022-09-21 3:00 AM  | 16.0 | 16.0 | 16.3 | 16.1 |
| 2022-09-21 4:00 AM  | 15.8 | 15.9 | 16.0 | 15.9 |
| 2022-09-21 5:00 AM  | 15.6 | 15.7 | 15.8 | 15.7 |
| 2022-09-21 6:00 AM  | 15.4 | 15.5 | 15.5 | 15.5 |
| 2022-09-21 7:00 AM  | 14.6 | 15.0 | 14.9 | 14.8 |
| 2022-09-21 8:00 AM  | 14.2 | 14.6 | 14.5 | 14.4 |
| 2022-09-21 9:00 AM  | 14.2 | 14.6 | 14.4 | 14.4 |

|                     |      |      |      |      |
|---------------------|------|------|------|------|
| 2022-09-21 10:00 AM | 15.0 | 14.9 | 14.8 | 14.9 |
| 2022-09-21 11:00 AM | 15.2 | 15.2 | 14.9 | 15.1 |
| 2022-09-21 12:00 PM | 15.1 | 15.0 | 14.7 | 14.9 |
| 2022-09-21 1:00 PM  | 14.4 | 14.3 | 14.2 | 14.3 |
| 2022-09-21 2:00 PM  | 14.8 | 14.6 | 15.6 | 15.0 |
| 2022-09-21 3:00 PM  | 14.1 | 14.1 | 14.1 | 14.1 |
| 2022-09-21 4:00 PM  | 13.5 | 13.7 | 13.7 | 13.6 |
| 2022-09-21 5:00 PM  | 13.5 | 13.5 | 14.6 | 13.9 |
| 2022-09-21 6:00 PM  | 12.9 | 13.0 | 13.0 | 13.0 |
| 2022-09-21 7:00 PM  | 12.6 | 12.8 | 12.3 | 12.6 |
| 2022-09-21 8:00 PM  | 12.4 | 12.7 | 12.1 | 12.4 |
| 2022-09-21 9:00 PM  | 12.1 | 12.5 | 11.7 | 12.1 |
| 2022-09-21 10:00 PM | 12.2 | 12.5 | 11.9 | 12.2 |
| 2022-09-21 11:00 PM | 12.1 | 12.4 | 11.9 | 12.1 |
| 2022-09-22 12:00 AM | 12.0 | 12.3 | 11.8 | 12.0 |
| 2022-09-22 1:00 AM  | 11.5 | 12.0 | 11.4 | 11.6 |
| 2022-09-22 2:00 AM  | 11.0 | 11.7 | 11.0 | 11.2 |
| 2022-09-22 3:00 AM  | 10.9 | 11.5 | 10.9 | 11.1 |
| 2022-09-22 4:00 AM  | 10.6 | 11.3 | 10.5 | 10.8 |
| 2022-09-22 5:00 AM  | 10.5 | 11.2 | 10.5 | 10.7 |
| 2022-09-22 6:00 AM  | 10.7 | 11.2 | 10.6 | 10.8 |
| 2022-09-22 7:00 AM  | 10.5 | 11.1 | 10.6 | 10.7 |
| 2022-09-22 8:00 AM  | 9.7  | 10.6 | 9.6  | 10.0 |
| 2022-09-22 9:00 AM  | 9.7  | 10.5 | 9.6  | 9.9  |
| 2022-09-22 10:00 AM | 9.4  | 10.3 | 8.9  | 9.5  |
| 2022-09-22 11:00 AM | 10.6 | 10.7 | 8.9  | 10.1 |
| 2022-09-22 12:00 PM | 11.4 | 11.2 | 9.9  | 10.8 |
| 2022-09-22 1:00 PM  | 11.5 | 11.3 | 10.9 | 11.2 |
| 2022-09-22 2:00 PM  | 11.5 | 11.5 | 14.0 | 12.3 |
| 2022-09-22 3:00 PM  | 11.3 | 11.4 | 13.2 | 12.0 |
| 2022-09-22 4:00 PM  | 11.3 | 11.4 | 11.8 | 11.5 |
| 2022-09-22 5:00 PM  | 11.5 | 11.6 | 15.2 | 12.8 |
| 2022-09-22 6:00 PM  | 11.7 | 11.8 | 14.0 | 12.5 |
| 2022-09-22 7:00 PM  | 11.5 | 11.6 | 12.5 | 11.9 |
| 2022-09-22 8:00 PM  | 11.0 | 11.3 | 11.7 | 11.3 |
| 2022-09-22 9:00 PM  | 10.5 | 11.0 | 10.9 | 10.8 |
| 2022-09-22 10:00 PM | 10.1 | 10.6 | 10.5 | 10.4 |
| 2022-09-22 11:00 PM | 9.8  | 10.3 | 10.1 | 10.1 |
| 2022-09-23 12:00 AM | 9.4  | 9.9  | 9.5  | 9.6  |
| 2022-09-23 1:00 AM  | 8.9  | 9.6  | 9.1  | 9.2  |
| 2022-09-23 2:00 AM  | 8.7  | 9.2  | 8.8  | 8.9  |
| 2022-09-23 3:00 AM  | 8.6  | 9.0  | 8.6  | 8.7  |
| 2022-09-23 4:00 AM  | 8.3  | 8.8  | 8.4  | 8.5  |
| 2022-09-23 5:00 AM  | 8.1  | 8.7  | 8.2  | 8.3  |
| 2022-09-23 6:00 AM  | 7.8  | 8.6  | 7.8  | 8.1  |

|                     |      |      |      |      |
|---------------------|------|------|------|------|
| 2022-09-23 7:00 AM  | 7.4  | 8.3  | 7.5  | 7.7  |
| 2022-09-23 8:00 AM  | 6.9  | 7.9  | 7.1  | 7.3  |
| 2022-09-23 9:00 AM  | 7.1  | 8.0  | 7.0  | 7.4  |
| 2022-09-23 10:00 AM | 8.2  | 8.8  | 8.1  | 8.4  |
| 2022-09-23 11:00 AM | 11.0 | 10.4 | 9.6  | 10.3 |
| 2022-09-23 12:00 PM | 11.8 | 11.0 | 11.0 | 11.3 |
| 2022-09-23 1:00 PM  | 12.2 | 11.4 | 12.0 | 11.9 |
| 2022-09-23 2:00 PM  | 12.5 | 11.8 | 12.8 | 12.4 |

**Table S6:** Hourly air temperature under 80% shade from May 10 to September 23, 2023.

|                     | Port 1                      | Port 2                      | Port 3                      | Average                     |
|---------------------|-----------------------------|-----------------------------|-----------------------------|-----------------------------|
|                     | 5TE<br>Moisture/<br>Temp/EC | 5TE<br>Moisture/<br>Temp/EC | 5TE<br>Moisture/<br>Temp/EC | 5TE<br>Moisture/<br>Temp/EC |
| Measurement Time    | °C Temp                     | °C Temp                     | °C Temp                     | °C Temp                     |
| 2022-06-22 5:00 PM  | 20.9                        | 21.1                        | 21.1                        | 21.0                        |
| 2022-06-22 6:00 PM  | 21.0                        | 20.2                        | 20.2                        | 20.6                        |
| 2022-06-22 7:00 PM  | 19.1                        | 18.9                        | 18.9                        | 19.0                        |
| 2022-06-22 8:00 PM  | 18.3                        | 18.2                        | 18.2                        | 18.3                        |
| 2022-06-22 9:00 PM  | 17.7                        | 17.6                        | 17.6                        | 17.7                        |
| 2022-06-22 10:00 PM | 16.8                        | 16.7                        | 16.7                        | 16.8                        |
| 2022-06-22 11:00 PM | 15.6                        | 15.7                        | 15.7                        | 15.7                        |
| 2022-06-23 12:00 AM | 14.8                        | 15.1                        | 15.1                        | 15.0                        |
| 2022-06-23 1:00 AM  | 14.3                        | 14.6                        | 14.6                        | 14.5                        |
| 2022-06-23 2:00 AM  | 13.5                        | 14.0                        | 14.0                        | 13.8                        |
| 2022-06-23 3:00 AM  | 13.2                        | 13.6                        | 13.6                        | 13.4                        |
| 2022-06-23 4:00 AM  | 12.5                        | 13.0                        | 13.0                        | 12.8                        |
| 2022-06-23 5:00 AM  | 12.2                        | 12.7                        | 12.7                        | 12.4                        |
| 2022-06-23 6:00 AM  | 12.2                        | 12.5                        | 12.5                        | 12.3                        |
| 2022-06-23 7:00 AM  | 12.0                        | 12.3                        | 12.3                        | 12.2                        |
| 2022-06-23 8:00 AM  | 12.4                        | 12.6                        | 12.6                        | 12.5                        |
| 2022-06-23 9:00 AM  | 12.9                        | 13.0                        | 13.0                        | 12.9                        |
| 2022-06-23 10:00 AM | 13.9                        | 13.7                        | 13.7                        | 13.8                        |
| 2022-06-23 11:00 AM | 16.0                        | 15.2                        | 15.2                        | 15.6                        |
| 2022-06-23 12:00 PM | 21.4                        | 19.8                        | 19.8                        | 20.6                        |
| 2022-06-23 1:00 PM  | 22.5                        | 21.0                        | 21.0                        | 21.8                        |
| 2022-06-23 2:00 PM  | 23.5                        | 21.7                        | 21.7                        | 22.6                        |
| 2022-06-23 3:00 PM  | 23.5                        | 22.7                        | 22.7                        | 23.1                        |
| 2022-06-23 4:00 PM  | 23.0                        | 23.0                        | 23.0                        | 23.0                        |
| 2022-06-23 5:00 PM  | 23.0                        | 23.2                        | 23.2                        | 23.1                        |



|                     |      |      |      |      |
|---------------------|------|------|------|------|
| 2022-06-23 6:00 PM  | 22.2 | 21.2 | 21.2 | 21.7 |
| 2022-06-23 7:00 PM  | 20.4 | 20.0 | 20.0 | 20.2 |
| 2022-06-23 8:00 PM  | 20.0 | 19.6 | 19.6 | 19.8 |
| 2022-06-23 9:00 PM  | 18.9 | 18.7 | 18.7 | 18.8 |
| 2022-06-23 10:00 PM | 18.3 | 18.2 | 18.2 | 18.3 |
| 2022-06-23 11:00 PM | 17.6 | 17.6 | 17.6 | 17.6 |
| 2022-06-24 12:00 AM | 16.9 | 17.0 | 17.0 | 16.9 |
| 2022-06-24 1:00 AM  | 15.8 | 15.8 | 15.8 | 15.8 |
| 2022-06-24 2:00 AM  | 15.4 | 15.5 | 15.5 | 15.4 |
| 2022-06-24 3:00 AM  | 15.1 | 15.2 | 15.2 | 15.2 |
| 2022-06-24 4:00 AM  | 13.9 | 14.0 | 14.0 | 13.9 |
| 2022-06-24 5:00 AM  | 13.4 | 13.6 | 13.6 | 13.5 |
| 2022-06-24 6:00 AM  | 13.2 | 13.4 | 13.4 | 13.3 |
| 2022-06-24 7:00 AM  | 13.2 | 13.4 | 13.4 | 13.3 |
| 2022-06-24 8:00 AM  | 14.0 | 14.0 | 14.0 | 14.0 |
| 2022-06-24 9:00 AM  | 15.2 | 15.0 | 15.0 | 15.1 |
| 2022-06-24 10:00 AM | 15.8 | 15.4 | 15.4 | 15.6 |
| 2022-06-24 11:00 AM | 16.7 | 16.0 | 16.0 | 16.4 |
| 2022-06-24 12:00 PM | 20.7 | 19.6 | 19.6 | 20.2 |
| 2022-06-24 1:00 PM  | 22.3 | 21.5 | 21.5 | 21.9 |
| 2022-06-24 2:00 PM  | 23.4 | 22.2 | 22.2 | 22.8 |
| 2022-06-24 3:00 PM  | 22.6 | 22.4 | 22.4 | 22.5 |
| 2022-06-24 4:00 PM  | 21.3 | 21.7 | 21.7 | 21.5 |
| 2022-06-24 5:00 PM  | 20.2 | 20.8 | 20.8 | 20.5 |
| 2022-06-24 6:00 PM  | 19.9 | 19.3 | 19.3 | 19.6 |
| 2022-06-24 7:00 PM  | 18.2 | 18.1 | 18.1 | 18.2 |
| 2022-06-24 8:00 PM  | 17.6 | 17.6 | 17.6 | 17.6 |
| 2022-06-24 9:00 PM  | 17.3 | 17.3 | 17.3 | 17.3 |
| 2022-06-24 10:00 PM | 16.7 | 16.8 | 16.8 | 16.8 |
| 2022-06-24 11:00 PM | 16.1 | 16.3 | 16.3 | 16.2 |
| 2022-06-25 12:00 AM | 15.6 | 15.8 | 15.8 | 15.7 |
| 2022-06-25 1:00 AM  | 15.2 | 15.4 | 15.4 | 15.3 |
| 2022-06-25 2:00 AM  | 15.0 | 15.3 | 15.3 | 15.2 |
| 2022-06-25 3:00 AM  | 15.2 | 15.3 | 15.3 | 15.3 |
| 2022-06-25 4:00 AM  | 15.2 | 15.3 | 15.3 | 15.3 |
| 2022-06-25 5:00 AM  | 14.8 | 14.9 | 14.9 | 14.8 |
| 2022-06-25 6:00 AM  | 14.5 | 14.6 | 14.6 | 14.6 |
| 2022-06-25 7:00 AM  | 14.3 | 14.3 | 14.3 | 14.3 |
| 2022-06-25 8:00 AM  | 14.2 | 14.2 | 14.2 | 14.2 |
| 2022-06-25 9:00 AM  | 14.5 | 14.4 | 14.4 | 14.4 |
| 2022-06-25 10:00 AM | 15.1 | 14.8 | 14.8 | 15.0 |
| 2022-06-25 11:00 AM | 15.4 | 15.1 | 15.1 | 15.3 |
| 2022-06-25 12:00 PM | 15.1 | 14.9 | 14.9 | 15.0 |

|                     |      |      |      |      |
|---------------------|------|------|------|------|
| 2022-06-25 1:00 PM  | 15.2 | 15.0 | 15.0 | 15.1 |
| 2022-06-25 2:00 PM  | 16.2 | 15.6 | 15.6 | 15.9 |
| 2022-06-25 3:00 PM  | 18.7 | 18.2 | 18.2 | 18.5 |
| 2022-06-25 4:00 PM  | 18.4 | 18.6 | 18.6 | 18.5 |
| 2022-06-25 5:00 PM  | 17.2 | 17.1 | 17.1 | 17.2 |
| 2022-06-25 6:00 PM  | 17.4 | 16.9 | 16.9 | 17.1 |
| 2022-06-25 7:00 PM  | 16.8 | 16.7 | 16.7 | 16.8 |
| 2022-06-25 8:00 PM  | 16.2 | 16.1 | 16.1 | 16.2 |
| 2022-06-25 9:00 PM  | 16.0 | 15.9 | 15.9 | 15.9 |
| 2022-06-25 10:00 PM | 15.2 | 15.3 | 15.3 | 15.3 |
| 2022-06-25 11:00 PM | 14.7 | 14.9 | 14.9 | 14.8 |
| 2022-06-26 12:00 AM | 14.3 | 14.5 | 14.5 | 14.4 |
| 2022-06-26 1:00 AM  | 14.1 | 14.3 | 14.3 | 14.2 |
| 2022-06-26 2:00 AM  | 14.0 | 14.2 | 14.2 | 14.1 |
| 2022-06-26 3:00 AM  | 14.3 | 14.4 | 14.4 | 14.3 |
| 2022-06-26 4:00 AM  | 13.8 | 14.0 | 14.0 | 13.9 |
| 2022-06-26 5:00 AM  | 13.3 | 13.6 | 13.6 | 13.5 |
| 2022-06-26 6:00 AM  | 12.6 | 13.0 | 13.0 | 12.8 |
| 2022-06-26 7:00 AM  | 12.4 | 12.7 | 12.7 | 12.5 |
| 2022-06-26 8:00 AM  | 12.7 | 12.8 | 12.8 | 12.8 |
| 2022-06-26 9:00 AM  | 13.4 | 13.5 | 13.5 | 13.4 |
| 2022-06-26 10:00 AM | 13.8 | 13.7 | 13.7 | 13.8 |
| 2022-06-26 11:00 AM | 15.1 | 14.6 | 14.6 | 14.9 |
| 2022-06-26 12:00 PM | 16.6 | 15.9 | 15.9 | 16.3 |
| 2022-06-26 1:00 PM  | 16.8 | 16.3 | 16.3 | 16.5 |
| 2022-06-26 2:00 PM  | 16.5 | 16.2 | 16.2 | 16.4 |
| 2022-06-26 3:00 PM  | 16.2 | 16.0 | 16.0 | 16.1 |
| 2022-06-26 4:00 PM  | 15.7 | 16.4 | 16.4 | 16.0 |
| 2022-06-26 5:00 PM  | 15.7 | 16.5 | 16.5 | 16.1 |
| 2022-06-26 6:00 PM  | 15.1 | 15.4 | 15.4 | 15.3 |
| 2022-06-26 7:00 PM  | 14.0 | 14.4 | 14.4 | 14.2 |
| 2022-06-26 8:00 PM  | 13.7 | 14.1 | 14.1 | 13.9 |
| 2022-06-26 9:00 PM  | 13.3 | 13.7 | 13.7 | 13.5 |
| 2022-06-26 10:00 PM | 12.9 | 13.1 | 13.1 | 13.0 |
| 2022-06-26 11:00 PM | 12.4 | 12.6 | 12.6 | 12.5 |
| 2022-06-27 12:00 AM | 12.2 | 12.3 | 12.3 | 12.3 |
| 2022-06-27 1:00 AM  | 11.9 | 12.0 | 12.0 | 11.9 |
| 2022-06-27 2:00 AM  | 11.9 | 12.0 | 12.0 | 11.9 |
| 2022-06-27 3:00 AM  | 11.7 | 11.7 | 11.7 | 11.7 |
| 2022-06-27 4:00 AM  | 11.5 | 11.4 | 11.4 | 11.4 |
| 2022-06-27 5:00 AM  | 11.4 | 11.4 | 11.4 | 11.4 |
| 2022-06-27 6:00 AM  | 10.9 | 11.0 | 11.0 | 10.9 |
| 2022-06-27 7:00 AM  | 10.0 | 10.3 | 10.3 | 10.2 |

|                     |      |      |      |      |
|---------------------|------|------|------|------|
| 2022-06-27 8:00 AM  | 10.1 | 10.4 | 10.4 | 10.3 |
| 2022-06-27 9:00 AM  | 10.9 | 11.0 | 11.0 | 10.9 |
| 2022-06-27 10:00 AM | 12.2 | 12.0 | 12.0 | 12.1 |
| 2022-06-27 11:00 AM | 14.3 | 13.5 | 13.5 | 13.9 |
| 2022-06-27 12:00 PM | 19.4 | 18.0 | 18.0 | 18.7 |
| 2022-06-27 1:00 PM  | 21.2 | 20.2 | 20.2 | 20.7 |
| 2022-06-27 2:00 PM  | 20.4 | 18.9 | 18.9 | 19.6 |
| 2022-06-27 3:00 PM  | 19.2 | 18.2 | 18.2 | 18.7 |
| 2022-06-27 4:00 PM  | 18.7 | 18.3 | 18.3 | 18.5 |
| 2022-06-27 5:00 PM  | 18.7 | 18.9 | 18.9 | 18.8 |
| 2022-06-27 6:00 PM  | 19.2 | 18.6 | 18.6 | 18.9 |
| 2022-06-27 7:00 PM  | 17.1 | 17.2 | 17.2 | 17.2 |
| 2022-06-27 8:00 PM  | 16.5 | 16.6 | 16.6 | 16.6 |
| 2022-06-27 9:00 PM  | 16.0 | 16.0 | 16.0 | 16.0 |
| 2022-06-27 10:00 PM | 15.0 | 15.2 | 15.2 | 15.1 |
| 2022-06-27 11:00 PM | 13.6 | 14.0 | 14.0 | 13.8 |
| 2022-06-28 12:00 AM | 12.9 | 13.3 | 13.3 | 13.1 |
| 2022-06-28 1:00 AM  | 12.9 | 13.2 | 13.2 | 13.0 |
| 2022-06-28 2:00 AM  | 14.2 | 14.4 | 14.4 | 14.3 |
| 2022-06-28 3:00 AM  | 14.4 | 14.6 | 14.6 | 14.5 |
| 2022-06-28 4:00 AM  | 14.7 | 14.8 | 14.8 | 14.8 |
| 2022-06-28 5:00 AM  | 14.5 | 14.6 | 14.6 | 14.6 |
| 2022-06-28 6:00 AM  | 14.3 | 14.4 | 14.4 | 14.3 |
| 2022-06-28 7:00 AM  | 14.2 | 14.3 | 14.3 | 14.3 |
| 2022-06-28 8:00 AM  | 14.4 | 14.4 | 14.4 | 14.4 |
| 2022-06-28 9:00 AM  | 14.5 | 14.5 | 14.5 | 14.5 |
| 2022-06-28 10:00 AM | 15.2 | 15.1 | 15.1 | 15.2 |
| 2022-06-28 11:00 AM | 15.9 | 15.8 | 15.8 | 15.8 |
| 2022-06-28 12:00 PM | 15.6 | 15.9 | 15.9 | 15.8 |
| 2022-06-28 1:00 PM  | 15.2 | 16.1 | 16.1 | 15.7 |
| 2022-06-28 2:00 PM  | 15.0 | 15.6 | 15.6 | 15.3 |
| 2022-06-28 3:00 PM  | 16.2 | 16.7 | 16.7 | 16.5 |
| 2022-06-28 4:00 PM  | 17.3 | 18.4 | 18.4 | 17.8 |
| 2022-06-28 5:00 PM  | 17.1 | 18.6 | 18.6 | 17.9 |
| 2022-06-28 6:00 PM  | 17.3 | 17.9 | 17.9 | 17.6 |
| 2022-06-28 7:00 PM  | 15.7 | 16.5 | 16.5 | 16.1 |
| 2022-06-28 8:00 PM  | 15.4 | 16.2 | 16.2 | 15.8 |
| 2022-06-28 9:00 PM  | 14.9 | 15.6 | 15.6 | 15.3 |
| 2022-06-28 10:00 PM | 14.3 | 14.8 | 14.8 | 14.6 |
| 2022-06-28 11:00 PM | 13.0 | 13.4 | 13.4 | 13.2 |
| 2022-06-29 12:00 AM | 12.4 | 12.5 | 12.5 | 12.4 |
| 2022-06-29 1:00 AM  | 11.6 | 11.7 | 11.7 | 11.7 |
| 2022-06-29 2:00 AM  | 10.8 | 11.2 | 11.2 | 11.0 |

|                     |      |      |      |      |
|---------------------|------|------|------|------|
| 2022-06-29 3:00 AM  | 10.3 | 10.8 | 10.8 | 10.6 |
| 2022-06-29 4:00 AM  | 10.2 | 10.4 | 10.4 | 10.3 |
| 2022-06-29 5:00 AM  | 9.6  | 10.0 | 10.0 | 9.8  |
| 2022-06-29 6:00 AM  | 9.1  | 9.6  | 9.6  | 9.4  |
| 2022-06-29 7:00 AM  | 8.5  | 9.4  | 9.4  | 8.9  |
| 2022-06-29 8:00 AM  | 9.0  | 9.4  | 9.4  | 9.2  |
| 2022-06-29 9:00 AM  | 10.5 | 10.5 | 10.5 | 10.5 |
| 2022-06-29 10:00 AM | 12.3 | 11.9 | 11.9 | 12.1 |
| 2022-06-29 11:00 AM | 14.6 | 13.7 | 13.7 | 14.2 |
| 2022-06-29 12:00 PM | 18.8 | 17.4 | 17.4 | 18.1 |
| 2022-06-29 1:00 PM  | 18.1 | 17.1 | 17.1 | 17.6 |
| 2022-06-29 2:00 PM  | 18.9 | 17.4 | 17.4 | 18.1 |
| 2022-06-29 3:00 PM  | 17.5 | 16.8 | 16.8 | 17.1 |
| 2022-06-29 4:00 PM  | 16.6 | 16.2 | 16.2 | 16.4 |
| 2022-06-29 5:00 PM  | 15.9 | 15.7 | 15.7 | 15.8 |
| 2022-06-29 6:00 PM  | 15.2 | 15.1 | 15.1 | 15.2 |
| 2022-06-29 7:00 PM  | 14.6 | 14.7 | 14.7 | 14.7 |
| 2022-06-29 8:00 PM  | 14.0 | 14.1 | 14.1 | 14.1 |
| 2022-06-29 9:00 PM  | 13.6 | 13.5 | 13.5 | 13.6 |
| 2022-06-29 10:00 PM | 12.9 | 12.8 | 12.8 | 12.8 |
| 2022-06-29 11:00 PM | 12.6 | 12.6 | 12.6 | 12.6 |
| 2022-06-30 12:00 AM | 12.5 | 12.4 | 12.4 | 12.4 |
| 2022-06-30 1:00 AM  | 12.3 | 12.0 | 12.0 | 12.2 |
| 2022-06-30 2:00 AM  | 11.8 | 11.5 | 11.5 | 11.7 |
| 2022-06-30 3:00 AM  | 12.0 | 11.7 | 11.7 | 11.8 |
| 2022-06-30 4:00 AM  | 12.1 | 11.7 | 11.7 | 11.9 |
| 2022-06-30 5:00 AM  | 12.2 | 12.0 | 12.0 | 12.1 |
| 2022-06-30 6:00 AM  | 12.3 | 12.0 | 12.0 | 12.2 |
| 2022-06-30 7:00 AM  | 12.4 | 12.2 | 12.2 | 12.3 |
| 2022-06-30 8:00 AM  | 12.7 | 12.5 | 12.5 | 12.6 |
| 2022-06-30 9:00 AM  | 12.9 | 12.7 | 12.7 | 12.8 |
| 2022-06-30 10:00 AM | 13.1 | 12.9 | 12.9 | 13.0 |
| 2022-06-30 11:00 AM | 13.8 | 13.5 | 13.5 | 13.7 |
| 2022-06-30 12:00 PM | 18.0 | 16.9 | 16.9 | 17.4 |
| 2022-06-30 1:00 PM  | 18.6 | 17.7 | 17.7 | 18.2 |
| 2022-06-30 2:00 PM  | 19.4 | 18.1 | 18.1 | 18.8 |
| 2022-06-30 3:00 PM  | 19.0 | 18.8 | 18.8 | 18.9 |
| 2022-06-30 4:00 PM  | 19.8 | 20.5 | 20.5 | 20.1 |
| 2022-06-30 5:00 PM  | 20.3 | 21.8 | 21.8 | 21.0 |
| 2022-06-30 6:00 PM  | 20.0 | 21.4 | 21.4 | 20.7 |
| 2022-06-30 7:00 PM  | 18.8 | 21.2 | 21.2 | 20.0 |
| 2022-06-30 8:00 PM  | 18.5 | 20.6 | 20.6 | 19.6 |
| 2022-06-30 9:00 PM  | 17.8 | 19.4 | 19.4 | 18.6 |

|                     |      |      |      |      |
|---------------------|------|------|------|------|
| 2022-06-30 10:00 PM | 17.1 | 18.1 | 18.1 | 17.6 |
| 2022-06-30 11:00 PM | 16.2 | 16.7 | 16.7 | 16.5 |
| 2022-07-01 12:00 AM | 15.4 | 15.8 | 15.8 | 15.6 |
| 2022-07-01 1:00 AM  | 15.2 | 15.6 | 15.6 | 15.4 |
| 2022-07-01 2:00 AM  | 14.6 | 14.9 | 14.9 | 14.8 |
| 2022-07-01 3:00 AM  | 13.6 | 13.9 | 13.9 | 13.8 |
| 2022-07-01 4:00 AM  | 12.8 | 13.0 | 13.0 | 12.9 |
| 2022-07-01 5:00 AM  | 11.9 | 12.1 | 12.1 | 12.0 |
| 2022-07-01 6:00 AM  | 11.7 | 12.0 | 12.0 | 11.8 |
| 2022-07-01 7:00 AM  | 11.6 | 11.7 | 11.7 | 11.7 |
| 2022-07-01 8:00 AM  | 11.3 | 11.4 | 11.4 | 11.3 |
| 2022-07-01 9:00 AM  | 12.0 | 12.0 | 12.0 | 12.0 |
| 2022-07-01 10:00 AM | 13.4 | 13.2 | 13.2 | 13.3 |
| 2022-07-01 11:00 AM | 15.2 | 14.7 | 14.7 | 14.9 |
| 2022-07-01 12:00 PM | 18.5 | 18.1 | 18.1 | 18.3 |
| 2022-07-01 1:00 PM  | 17.5 | 17.0 | 17.0 | 17.3 |
| 2022-07-01 2:00 PM  | 17.2 | 16.9 | 16.9 | 17.1 |
| 2022-07-01 3:00 PM  | 16.8 | 16.8 | 16.8 | 16.8 |
| 2022-07-01 4:00 PM  | 18.9 | 20.1 | 20.1 | 19.5 |
| 2022-07-01 5:00 PM  | 18.8 | 20.1 | 20.1 | 19.4 |
| 2022-07-01 6:00 PM  | 18.4 | 19.0 | 19.0 | 18.7 |
| 2022-07-01 7:00 PM  | 17.0 | 18.0 | 18.0 | 17.5 |
| 2022-07-01 8:00 PM  | 16.6 | 17.9 | 17.9 | 17.3 |
| 2022-07-01 9:00 PM  | 16.2 | 17.4 | 17.4 | 16.8 |
| 2022-07-01 10:00 PM | 15.6 | 16.3 | 16.3 | 15.9 |
| 2022-07-01 11:00 PM | 14.9 | 15.3 | 15.3 | 15.1 |
| 2022-07-02 12:00 AM | 14.1 | 14.4 | 14.4 | 14.3 |
| 2022-07-02 1:00 AM  | 13.7 | 14.0 | 14.0 | 13.8 |
| 2022-07-02 2:00 AM  | 12.9 | 13.0 | 13.0 | 12.9 |
| 2022-07-02 3:00 AM  | 12.1 | 12.2 | 12.2 | 12.2 |
| 2022-07-02 4:00 AM  | 11.6 | 11.6 | 11.6 | 11.6 |
| 2022-07-02 5:00 AM  | 11.1 | 11.1 | 11.1 | 11.1 |
| 2022-07-02 6:00 AM  | 10.8 | 10.9 | 10.9 | 10.8 |
| 2022-07-02 7:00 AM  | 10.4 | 10.4 | 10.4 | 10.4 |
| 2022-07-02 8:00 AM  | 10.6 | 10.6 | 10.6 | 10.6 |
| 2022-07-02 9:00 AM  | 11.5 | 11.5 | 11.5 | 11.5 |
| 2022-07-02 10:00 AM | 12.8 | 12.9 | 12.9 | 12.8 |
| 2022-07-02 11:00 AM | 14.4 | 14.7 | 14.7 | 14.5 |
| 2022-07-02 12:00 PM | 17.6 | 18.3 | 18.3 | 17.9 |
| 2022-07-02 1:00 PM  | 18.8 | 19.4 | 19.4 | 19.1 |
| 2022-07-02 2:00 PM  | 18.8 | 18.8 | 18.8 | 18.8 |
| 2022-07-02 3:00 PM  | 17.3 | 17.9 | 17.9 | 17.6 |
| 2022-07-02 4:00 PM  | 16.7 | 17.3 | 17.3 | 17.0 |

|                     |      |      |      |      |
|---------------------|------|------|------|------|
| 2022-07-02 5:00 PM  | 16.8 | 17.0 | 17.0 | 16.9 |
| 2022-07-02 6:00 PM  | 17.5 | 17.8 | 17.8 | 17.6 |
| 2022-07-02 7:00 PM  | 16.3 | 16.7 | 16.7 | 16.5 |
| 2022-07-02 8:00 PM  | 15.8 | 16.3 | 16.3 | 16.0 |
| 2022-07-02 9:00 PM  | 15.4 | 15.8 | 15.8 | 15.6 |
| 2022-07-02 10:00 PM | 14.9 | 15.0 | 15.0 | 14.9 |
| 2022-07-02 11:00 PM | 14.2 | 14.4 | 14.4 | 14.3 |
| 2022-07-03 12:00 AM | 13.8 | 14.0 | 14.0 | 13.9 |
| 2022-07-03 1:00 AM  | 13.4 | 13.5 | 13.5 | 13.4 |
| 2022-07-03 2:00 AM  | 12.4 | 12.5 | 12.5 | 12.4 |
| 2022-07-03 3:00 AM  | 11.9 | 12.0 | 12.0 | 11.9 |
| 2022-07-03 4:00 AM  | 11.4 | 11.4 | 11.4 | 11.4 |
| 2022-07-03 5:00 AM  | 10.9 | 11.0 | 11.0 | 10.9 |
| 2022-07-03 6:00 AM  | 10.7 | 10.8 | 10.8 | 10.8 |
| 2022-07-03 7:00 AM  | 11.2 | 11.1 | 11.1 | 11.2 |
| 2022-07-03 8:00 AM  | 11.9 | 11.7 | 11.7 | 11.8 |
| 2022-07-03 9:00 AM  | 12.8 | 12.5 | 12.5 | 12.7 |
| 2022-07-03 10:00 AM | 13.9 | 13.6 | 13.6 | 13.8 |
| 2022-07-03 11:00 AM | 15.8 | 15.3 | 15.3 | 15.6 |
| 2022-07-03 12:00 PM | 19.3 | 18.9 | 18.9 | 19.1 |
| 2022-07-03 1:00 PM  | 21.3 | 20.8 | 20.8 | 21.0 |
| 2022-07-03 2:00 PM  | 21.3 | 20.3 | 20.3 | 20.8 |
| 2022-07-03 3:00 PM  | 20.7 | 21.2 | 21.2 | 21.0 |
| 2022-07-03 4:00 PM  | 19.5 | 21.3 | 21.3 | 20.4 |
| 2022-07-03 5:00 PM  | 18.4 | 19.3 | 19.3 | 18.8 |
| 2022-07-03 6:00 PM  | 17.2 | 17.4 | 17.4 | 17.3 |
| 2022-07-03 7:00 PM  | 16.8 | 16.8 | 16.8 | 16.8 |
| 2022-07-03 8:00 PM  | 16.5 | 16.5 | 16.5 | 16.5 |
| 2022-07-03 9:00 PM  | 16.1 | 16.0 | 16.0 | 16.1 |
| 2022-07-03 10:00 PM | 15.0 | 15.1 | 15.1 | 15.1 |
| 2022-07-03 11:00 PM | 14.7 | 14.7 | 14.7 | 14.7 |
| 2022-07-04 12:00 AM | 13.9 | 14.0 | 14.0 | 13.9 |
| 2022-07-04 1:00 AM  | 13.2 | 13.3 | 13.3 | 13.3 |
| 2022-07-04 2:00 AM  | 13.0 | 13.0 | 13.0 | 13.0 |
| 2022-07-04 3:00 AM  | 12.7 | 12.7 | 12.7 | 12.7 |
| 2022-07-04 4:00 AM  | 12.5 | 12.2 | 12.2 | 12.3 |
| 2022-07-04 5:00 AM  | 12.2 | 12.0 | 12.0 | 12.1 |
| 2022-07-04 6:00 AM  | 12.0 | 11.8 | 11.8 | 11.9 |
| 2022-07-04 7:00 AM  | 12.0 | 11.8 | 11.8 | 11.9 |
| 2022-07-04 8:00 AM  | 12.5 | 12.4 | 12.4 | 12.4 |
| 2022-07-04 9:00 AM  | 13.1 | 12.8 | 12.8 | 13.0 |
| 2022-07-04 10:00 AM | 14.0 | 13.0 | 13.0 | 13.5 |
| 2022-07-04 11:00 AM | 13.8 | 12.8 | 12.8 | 13.3 |

|                     |      |      |      |      |
|---------------------|------|------|------|------|
| 2022-07-04 12:00 PM | 13.9 | 13.1 | 13.1 | 13.5 |
| 2022-07-04 1:00 PM  | 15.1 | 14.4 | 14.4 | 14.8 |
| 2022-07-04 2:00 PM  | 14.8 | 14.2 | 14.2 | 14.5 |
| 2022-07-04 3:00 PM  | 14.5 | 14.0 | 14.0 | 14.3 |
| 2022-07-04 4:00 PM  | 14.0 | 13.5 | 13.5 | 13.8 |
| 2022-07-04 5:00 PM  | 14.3 | 13.9 | 13.9 | 14.1 |
| 2022-07-04 6:00 PM  | 14.5 | 14.1 | 14.1 | 14.3 |
| 2022-07-04 7:00 PM  | 14.4 | 14.1 | 14.1 | 14.3 |
| 2022-07-04 8:00 PM  | 14.1 | 13.9 | 13.9 | 14.0 |
| 2022-07-04 9:00 PM  | 13.7 | 13.6 | 13.6 | 13.7 |
| 2022-07-04 10:00 PM | 13.7 | 13.6 | 13.6 | 13.7 |
| 2022-07-04 11:00 PM | 13.7 | 13.5 | 13.5 | 13.6 |
| 2022-07-05 12:00 AM | 13.5 | 13.4 | 13.4 | 13.4 |
| 2022-07-05 1:00 AM  | 13.7 | 13.6 | 13.6 | 13.7 |
| 2022-07-05 2:00 AM  | 13.9 | 13.8 | 13.8 | 13.8 |
| 2022-07-05 3:00 AM  | 14.0 | 13.9 | 13.9 | 13.9 |
| 2022-07-05 4:00 AM  | 14.0 | 13.9 | 13.9 | 13.9 |
| 2022-07-05 5:00 AM  | 14.0 | 13.9 | 13.9 | 13.9 |
| 2022-07-05 6:00 AM  | 14.0 | 13.9 | 13.9 | 13.9 |
| 2022-07-05 7:00 AM  | 14.0 | 14.0 | 14.0 | 14.0 |
| 2022-07-05 8:00 AM  | 14.0 | 14.0 | 14.0 | 14.0 |
| 2022-07-05 9:00 AM  | 13.9 | 13.8 | 13.8 | 13.8 |
| 2022-07-05 10:00 AM | 14.0 | 13.9 | 13.9 | 13.9 |
| 2022-07-05 11:00 AM | 14.2 | 14.1 | 14.1 | 14.2 |
| 2022-07-05 12:00 PM | 14.4 | 14.4 | 14.4 | 14.4 |
| 2022-07-05 1:00 PM  | 15.0 | 14.9 | 14.9 | 14.9 |
| 2022-07-05 2:00 PM  | 15.9 | 15.7 | 15.7 | 15.8 |
| 2022-07-05 3:00 PM  | 15.9 | 16.1 | 16.1 | 16.0 |
| 2022-07-05 4:00 PM  | 16.4 | 16.7 | 16.7 | 16.6 |
| 2022-07-05 5:00 PM  | 16.9 | 17.4 | 17.4 | 17.1 |
| 2022-07-05 6:00 PM  | 16.8 | 17.3 | 17.3 | 17.0 |
| 2022-07-05 7:00 PM  | 16.2 | 17.2 | 17.2 | 16.7 |
| 2022-07-05 8:00 PM  | 16.0 | 16.8 | 16.8 | 16.4 |
| 2022-07-05 9:00 PM  | 15.8 | 16.6 | 16.6 | 16.2 |
| 2022-07-05 10:00 PM | 15.5 | 16.1 | 16.1 | 15.8 |
| 2022-07-05 11:00 PM | 15.0 | 15.5 | 15.5 | 15.3 |
| 2022-07-06 12:00 AM | 14.3 | 14.6 | 14.6 | 14.5 |
| 2022-07-06 1:00 AM  | 13.6 | 13.9 | 13.9 | 13.8 |
| 2022-07-06 2:00 AM  | 13.4 | 13.6 | 13.6 | 13.5 |
| 2022-07-06 3:00 AM  | 12.9 | 13.2 | 13.2 | 13.0 |
| 2022-07-06 4:00 AM  | 12.7 | 12.8 | 12.8 | 12.8 |
| 2022-07-06 5:00 AM  | 12.5 | 12.5 | 12.5 | 12.5 |
| 2022-07-06 6:00 AM  | 12.2 | 12.2 | 12.2 | 12.2 |

|                     |      |      |      |      |
|---------------------|------|------|------|------|
| 2022-07-06 7:00 AM  | 12.1 | 11.9 | 11.9 | 12.0 |
| 2022-07-06 8:00 AM  | 11.8 | 11.9 | 11.9 | 11.8 |
| 2022-07-06 9:00 AM  | 12.5 | 12.5 | 12.5 | 12.5 |
| 2022-07-06 10:00 AM | 13.8 | 13.6 | 13.6 | 13.7 |
| 2022-07-06 11:00 AM | 15.3 | 15.0 | 15.0 | 15.2 |
| 2022-07-06 12:00 PM | 19.2 | 18.7 | 18.7 | 19.0 |
| 2022-07-06 1:00 PM  | 20.2 | 19.9 | 19.9 | 20.1 |
| 2022-07-06 2:00 PM  | 20.6 | 19.6 | 19.6 | 20.1 |
| 2022-07-06 3:00 PM  | 20.0 | 20.6 | 20.6 | 20.3 |
| 2022-07-06 4:00 PM  | 19.0 | 20.9 | 20.9 | 19.9 |
| 2022-07-06 5:00 PM  | 18.3 | 20.2 | 20.2 | 19.3 |
| 2022-07-06 6:00 PM  | 18.1 | 18.4 | 18.4 | 18.3 |
| 2022-07-06 7:00 PM  | 16.5 | 16.8 | 16.8 | 16.6 |
| 2022-07-06 8:00 PM  | 15.7 | 16.0 | 16.0 | 15.8 |
| 2022-07-06 9:00 PM  | 15.4 | 15.6 | 15.6 | 15.5 |
| 2022-07-06 10:00 PM | 14.8 | 15.0 | 15.0 | 14.9 |
| 2022-07-06 11:00 PM | 13.7 | 14.0 | 14.0 | 13.8 |
| 2022-07-07 12:00 AM | 13.4 | 13.5 | 13.5 | 13.4 |
| 2022-07-07 1:00 AM  | 13.1 | 13.2 | 13.2 | 13.2 |
| 2022-07-07 2:00 AM  | 12.8 | 12.7 | 12.7 | 12.8 |
| 2022-07-07 3:00 AM  | 12.4 | 12.4 | 12.4 | 12.4 |
| 2022-07-07 4:00 AM  | 12.0 | 11.9 | 11.9 | 11.9 |
| 2022-07-07 5:00 AM  | 11.7 | 11.5 | 11.5 | 11.6 |
| 2022-07-07 6:00 AM  | 11.6 | 11.2 | 11.2 | 11.4 |
| 2022-07-07 7:00 AM  | 11.7 | 11.5 | 11.5 | 11.6 |
| 2022-07-07 8:00 AM  | 12.2 | 11.9 | 11.9 | 12.0 |
| 2022-07-07 9:00 AM  | 12.8 | 12.5 | 12.5 | 12.7 |
| 2022-07-07 10:00 AM | 13.8 | 13.4 | 13.4 | 13.6 |
| 2022-07-07 11:00 AM | 15.3 | 14.9 | 14.9 | 15.1 |
| 2022-07-07 12:00 PM | 19.4 | 19.1 | 19.1 | 19.3 |
| 2022-07-07 1:00 PM  | 20.5 | 20.4 | 20.4 | 20.4 |
| 2022-07-07 2:00 PM  | 20.3 | 20.5 | 20.5 | 20.4 |
| 2022-07-07 3:00 PM  | 21.1 | 21.6 | 21.6 | 21.4 |
| 2022-07-07 4:00 PM  | 20.4 | 21.7 | 21.7 | 21.1 |
| 2022-07-07 5:00 PM  | 19.5 | 21.0 | 21.0 | 20.3 |
| 2022-07-07 6:00 PM  | 19.1 | 19.5 | 19.5 | 19.3 |
| 2022-07-07 7:00 PM  | 18.3 | 18.4 | 18.4 | 18.3 |
| 2022-07-07 8:00 PM  | 17.6 | 17.8 | 17.8 | 17.7 |
| 2022-07-07 9:00 PM  | 17.1 | 17.8 | 17.8 | 17.4 |
| 2022-07-07 10:00 PM | 16.7 | 17.2 | 17.2 | 17.0 |
| 2022-07-07 11:00 PM | 16.3 | 16.8 | 16.8 | 16.5 |
| 2022-07-08 12:00 AM | 16.0 | 16.4 | 16.4 | 16.2 |
| 2022-07-08 1:00 AM  | 15.6 | 15.9 | 15.9 | 15.8 |



|                     |      |      |      |      |
|---------------------|------|------|------|------|
| 2022-07-08 2:00 AM  | 14.9 | 15.1 | 15.1 | 15.0 |
| 2022-07-08 3:00 AM  | 14.4 | 14.5 | 14.5 | 14.4 |
| 2022-07-08 4:00 AM  | 13.7 | 13.8 | 13.8 | 13.8 |
| 2022-07-08 5:00 AM  | 13.2 | 13.4 | 13.4 | 13.3 |
| 2022-07-08 6:00 AM  | 12.5 | 12.7 | 12.7 | 12.6 |
| 2022-07-08 7:00 AM  | 12.2 | 12.4 | 12.4 | 12.3 |
| 2022-07-08 8:00 AM  | 12.4 | 12.4 | 12.4 | 12.4 |
| 2022-07-08 9:00 AM  | 13.2 | 13.1 | 13.1 | 13.2 |
| 2022-07-08 10:00 AM | 14.7 | 14.5 | 14.5 | 14.6 |
| 2022-07-08 11:00 AM | 16.3 | 15.9 | 15.9 | 16.1 |
| 2022-07-08 12:00 PM | 19.5 | 19.0 | 19.0 | 19.3 |
| 2022-07-08 1:00 PM  | 21.3 | 21.1 | 21.1 | 21.2 |
| 2022-07-08 2:00 PM  | 21.6 | 20.8 | 20.8 | 21.2 |
| 2022-07-08 3:00 PM  | 21.6 | 21.8 | 21.8 | 21.7 |
| 2022-07-08 4:00 PM  | 20.6 | 22.0 | 22.0 | 21.3 |
| 2022-07-08 5:00 PM  | 20.2 | 21.5 | 21.5 | 20.9 |
| 2022-07-08 6:00 PM  | 19.4 | 19.9 | 19.9 | 19.6 |
| 2022-07-08 7:00 PM  | 17.7 | 18.1 | 18.1 | 17.9 |
| 2022-07-08 8:00 PM  | 17.0 | 17.3 | 17.3 | 17.1 |
| 2022-07-08 9:00 PM  | 16.7 | 16.9 | 16.9 | 16.8 |
| 2022-07-08 10:00 PM | 16.1 | 16.2 | 16.2 | 16.2 |
| 2022-07-08 11:00 PM | 15.4 | 15.7 | 15.7 | 15.5 |
| 2022-07-09 12:00 AM | 15.1 | 15.3 | 15.3 | 15.2 |
| 2022-07-09 1:00 AM  | 14.6 | 14.8 | 14.8 | 14.7 |
| 2022-07-09 2:00 AM  | 14.3 | 14.5 | 14.5 | 14.4 |
| 2022-07-09 3:00 AM  | 13.7 | 13.9 | 13.9 | 13.8 |
| 2022-07-09 4:00 AM  | 13.1 | 13.3 | 13.3 | 13.2 |
| 2022-07-09 5:00 AM  | 12.7 | 12.8 | 12.8 | 12.8 |
| 2022-07-09 6:00 AM  | 12.6 | 12.6 | 12.6 | 12.6 |
| 2022-07-09 7:00 AM  | 12.1 | 12.2 | 12.2 | 12.2 |
| 2022-07-09 8:00 AM  | 12.2 | 12.2 | 12.2 | 12.2 |
| 2022-07-09 9:00 AM  | 13.3 | 13.2 | 13.2 | 13.3 |
| 2022-07-09 10:00 AM | 14.8 | 14.6 | 14.6 | 14.7 |
| 2022-07-09 11:00 AM | 16.5 | 16.1 | 16.1 | 16.3 |
| 2022-07-09 12:00 PM | 20.3 | 19.9 | 19.9 | 20.1 |
| 2022-07-09 1:00 PM  | 21.7 | 21.7 | 21.7 | 21.7 |
| 2022-07-09 2:00 PM  | 22.2 | 21.6 | 21.6 | 21.9 |
| 2022-07-09 3:00 PM  | 21.8 | 22.4 | 22.4 | 22.1 |
| 2022-07-09 4:00 PM  | 20.7 | 22.1 | 22.1 | 21.4 |
| 2022-07-09 5:00 PM  | 20.2 | 21.4 | 21.4 | 20.8 |
| 2022-07-09 6:00 PM  | 20.3 | 20.5 | 20.5 | 20.4 |
| 2022-07-09 7:00 PM  | 18.5 | 18.6 | 18.6 | 18.6 |
| 2022-07-09 8:00 PM  | 17.5 | 17.7 | 17.7 | 17.6 |

|                     |      |      |      |      |
|---------------------|------|------|------|------|
| 2022-07-09 9:00 PM  | 17.1 | 17.2 | 17.2 | 17.2 |
| 2022-07-09 10:00 PM | 16.6 | 16.7 | 16.7 | 16.7 |
| 2022-07-09 11:00 PM | 15.7 | 15.9 | 15.9 | 15.8 |
| 2022-07-10 12:00 AM | 15.1 | 15.2 | 15.2 | 15.2 |
| 2022-07-10 1:00 AM  | 14.7 | 14.6 | 14.6 | 14.7 |
| 2022-07-10 2:00 AM  | 14.3 | 14.1 | 14.1 | 14.2 |
| 2022-07-10 3:00 AM  | 14.2 | 13.8 | 13.8 | 14.0 |
| 2022-07-10 4:00 AM  | 14.2 | 14.0 | 14.0 | 14.1 |
| 2022-07-10 5:00 AM  | 14.0 | 13.6 | 13.6 | 13.8 |
| 2022-07-10 6:00 AM  | 13.7 | 13.4 | 13.4 | 13.5 |
| 2022-07-10 7:00 AM  | 13.7 | 13.4 | 13.4 | 13.5 |
| 2022-07-10 8:00 AM  | 14.4 | 14.2 | 14.2 | 14.3 |
| 2022-07-10 9:00 AM  | 14.8 | 14.7 | 14.7 | 14.8 |
| 2022-07-10 10:00 AM | 15.6 | 15.4 | 15.4 | 15.5 |
| 2022-07-10 11:00 AM | 16.7 | 16.4 | 16.4 | 16.6 |
| 2022-07-10 12:00 PM | 17.6 | 17.3 | 17.3 | 17.4 |
| 2022-07-10 1:00 PM  | 18.4 | 18.1 | 18.1 | 18.3 |
| 2022-07-10 2:00 PM  | 20.5 | 19.9 | 19.9 | 20.2 |
| 2022-07-10 3:00 PM  | 20.7 | 20.6 | 20.6 | 20.7 |
| 2022-07-10 4:00 PM  | 18.4 | 18.3 | 18.3 | 18.3 |
| 2022-07-10 5:00 PM  | 17.2 | 17.3 | 17.3 | 17.3 |
| 2022-07-10 6:00 PM  | 17.5 | 17.7 | 17.7 | 17.6 |
| 2022-07-10 7:00 PM  | 17.5 | 17.5 | 17.5 | 17.5 |
| 2022-07-10 8:00 PM  | 17.7 | 17.7 | 17.7 | 17.7 |
| 2022-07-10 9:00 PM  | 17.5 | 17.5 | 17.5 | 17.5 |
| 2022-07-10 10:00 PM | 17.0 | 17.2 | 17.2 | 17.1 |
| 2022-07-10 11:00 PM | 16.8 | 16.9 | 16.9 | 16.8 |
| 2022-07-11 12:00 AM | 16.4 | 16.5 | 16.5 | 16.4 |
| 2022-07-11 1:00 AM  | 16.3 | 16.4 | 16.4 | 16.3 |
| 2022-07-11 2:00 AM  | 16.1 | 16.2 | 16.2 | 16.2 |
| 2022-07-11 3:00 AM  | 16.1 | 16.1 | 16.1 | 16.1 |
| 2022-07-11 4:00 AM  | 16.4 | 16.5 | 16.5 | 16.4 |
| 2022-07-11 5:00 AM  | 16.2 | 16.3 | 16.3 | 16.3 |
| 2022-07-11 6:00 AM  | 16.2 | 16.3 | 16.3 | 16.3 |
| 2022-07-11 7:00 AM  | 16.1 | 16.1 | 16.1 | 16.1 |
| 2022-07-11 8:00 AM  | 16.1 | 16.2 | 16.2 | 16.2 |
| 2022-07-11 9:00 AM  | 16.5 | 16.9 | 16.9 | 16.7 |
| 2022-07-11 10:00 AM | 17.2 | 17.6 | 17.6 | 17.4 |
| 2022-07-11 11:00 AM | 18.2 | 18.4 | 18.4 | 18.3 |
| 2022-07-11 12:00 PM | 20.7 | 21.2 | 21.2 | 21.0 |
| 2022-07-11 1:00 PM  | 20.3 | 20.8 | 20.8 | 20.5 |
| 2022-07-11 2:00 PM  | 20.3 | 20.7 | 20.7 | 20.5 |
| 2022-07-11 3:00 PM  | 20.6 | 21.4 | 21.4 | 21.0 |

|                     |      |      |      |      |
|---------------------|------|------|------|------|
| 2022-07-11 4:00 PM  | 20.1 | 21.1 | 21.1 | 20.6 |
| 2022-07-11 5:00 PM  | 19.9 | 20.5 | 20.5 | 20.2 |
| 2022-07-11 6:00 PM  | 19.7 | 20.4 | 20.4 | 20.1 |
| 2022-07-11 7:00 PM  | 19.2 | 20.1 | 20.1 | 19.7 |
| 2022-07-11 8:00 PM  | 19.2 | 20.0 | 20.0 | 19.6 |
| 2022-07-11 9:00 PM  | 18.3 | 19.5 | 19.5 | 18.9 |
| 2022-07-11 10:00 PM | 17.6 | 18.1 | 18.1 | 17.9 |
| 2022-07-11 11:00 PM | 17.2 | 17.5 | 17.5 | 17.4 |
| 2022-07-12 12:00 AM | 17.0 | 17.1 | 17.1 | 17.1 |
| 2022-07-12 1:00 AM  | 16.9 | 17.1 | 17.1 | 17.0 |
| 2022-07-12 2:00 AM  | 17.0 | 17.1 | 17.1 | 17.1 |
| 2022-07-12 3:00 AM  | 17.0 | 17.1 | 17.1 | 17.1 |
| 2022-07-12 4:00 AM  | 16.9 | 17.0 | 17.0 | 16.9 |
| 2022-07-12 5:00 AM  | 16.8 | 16.8 | 16.8 | 16.8 |
| 2022-07-12 6:00 AM  | 16.7 | 16.7 | 16.7 | 16.7 |
| 2022-07-12 7:00 AM  | 16.5 | 16.6 | 16.6 | 16.6 |
| 2022-07-12 8:00 AM  | 16.4 | 16.3 | 16.3 | 16.3 |
| 2022-07-12 9:00 AM  | 16.2 | 16.1 | 16.1 | 16.2 |
| 2022-07-12 10:00 AM | 16.1 | 16.0 | 16.0 | 16.1 |
| 2022-07-12 11:00 AM | 15.9 | 15.7 | 15.7 | 15.8 |
| 2022-07-12 12:00 PM | 15.8 | 15.3 | 15.3 | 15.6 |
| 2022-07-12 1:00 PM  | 15.5 | 15.2 | 15.2 | 15.3 |
| 2022-07-12 2:00 PM  | 16.3 | 15.9 | 15.9 | 16.1 |
| 2022-07-12 3:00 PM  | 17.8 | 17.3 | 17.3 | 17.5 |
| 2022-07-12 4:00 PM  | 17.7 | 17.1 | 17.1 | 17.4 |
| 2022-07-12 5:00 PM  | 17.1 | 16.6 | 16.6 | 16.9 |
| 2022-07-12 6:00 PM  | 17.4 | 16.9 | 16.9 | 17.1 |
| 2022-07-12 7:00 PM  | 16.8 | 16.4 | 16.4 | 16.6 |
| 2022-07-12 8:00 PM  | 16.5 | 16.2 | 16.2 | 16.4 |
| 2022-07-12 9:00 PM  | 16.2 | 15.9 | 15.9 | 16.1 |
| 2022-07-12 10:00 PM | 15.6 | 15.5 | 15.5 | 15.6 |
| 2022-07-12 11:00 PM | 14.8 | 14.7 | 14.7 | 14.8 |
| 2022-07-13 12:00 AM | 14.6 | 14.6 | 14.6 | 14.6 |
| 2022-07-13 1:00 AM  | 14.1 | 14.1 | 14.1 | 14.1 |
| 2022-07-13 2:00 AM  | 13.6 | 13.5 | 13.5 | 13.6 |
| 2022-07-13 3:00 AM  | 13.2 | 13.2 | 13.2 | 13.2 |
| 2022-07-13 4:00 AM  | 12.7 | 12.8 | 12.8 | 12.8 |
| 2022-07-13 5:00 AM  | 12.2 | 12.3 | 12.3 | 12.3 |
| 2022-07-13 6:00 AM  | 12.0 | 11.9 | 11.9 | 11.9 |
| 2022-07-13 7:00 AM  | 11.7 | 11.7 | 11.7 | 11.7 |
| 2022-07-13 8:00 AM  | 12.0 | 11.8 | 11.8 | 11.9 |
| 2022-07-13 9:00 AM  | 12.8 | 12.6 | 12.6 | 12.7 |
| 2022-07-13 10:00 AM | 13.9 | 13.8 | 13.8 | 13.8 |

|                     |      |      |      |      |
|---------------------|------|------|------|------|
| 2022-07-13 11:00 AM | 15.5 | 15.3 | 15.3 | 15.4 |
| 2022-07-13 12:00 PM | 19.1 | 19.0 | 19.0 | 19.1 |
| 2022-07-13 1:00 PM  | 19.5 | 19.5 | 19.5 | 19.5 |
| 2022-07-13 2:00 PM  | 20.4 | 19.6 | 19.6 | 20.0 |
| 2022-07-13 3:00 PM  | 19.9 | 19.9 | 19.9 | 19.9 |
| 2022-07-13 4:00 PM  | 19.5 | 20.8 | 20.8 | 20.1 |
| 2022-07-13 5:00 PM  | 19.1 | 20.7 | 20.7 | 19.9 |
| 2022-07-13 6:00 PM  | 18.9 | 19.4 | 19.4 | 19.1 |
| 2022-07-13 7:00 PM  | 17.6 | 17.8 | 17.8 | 17.7 |
| 2022-07-13 8:00 PM  | 16.7 | 16.9 | 16.9 | 16.8 |
| 2022-07-13 9:00 PM  | 16.3 | 16.5 | 16.5 | 16.4 |
| 2022-07-13 10:00 PM | 15.9 | 15.8 | 15.8 | 15.8 |
| 2022-07-13 11:00 PM | 15.2 | 15.0 | 15.0 | 15.1 |
| 2022-07-14 12:00 AM | 14.9 | 14.8 | 14.8 | 14.8 |
| 2022-07-14 1:00 AM  | 14.6 | 14.3 | 14.3 | 14.5 |
| 2022-07-14 2:00 AM  | 14.3 | 13.7 | 13.7 | 14.0 |
| 2022-07-14 3:00 AM  | 13.9 | 13.4 | 13.4 | 13.6 |
| 2022-07-14 4:00 AM  | 13.2 | 13.0 | 13.0 | 13.1 |
| 2022-07-14 5:00 AM  | 12.6 | 12.5 | 12.5 | 12.6 |
| 2022-07-14 6:00 AM  | 12.0 | 11.9 | 11.9 | 11.9 |
| 2022-07-14 7:00 AM  | 11.8 | 11.7 | 11.7 | 11.8 |
| 2022-07-14 8:00 AM  | 12.1 | 11.8 | 11.8 | 12.0 |
| 2022-07-14 9:00 AM  | 12.9 | 12.6 | 12.6 | 12.8 |
| 2022-07-14 10:00 AM | 14.3 | 14.0 | 14.0 | 14.2 |
| 2022-07-14 11:00 AM | 15.2 | 15.0 | 15.0 | 15.1 |
| 2022-07-14 12:00 PM | 18.3 | 18.3 | 18.3 | 18.3 |
| 2022-07-14 1:00 PM  | 19.8 | 19.9 | 19.9 | 19.8 |
| 2022-07-14 2:00 PM  | 21.0 | 20.3 | 20.3 | 20.6 |
| 2022-07-14 3:00 PM  | 20.6 | 21.1 | 21.1 | 20.9 |
| 2022-07-14 4:00 PM  | 19.8 | 22.1 | 22.1 | 20.9 |
| 2022-07-14 5:00 PM  | 19.4 | 21.4 | 21.4 | 20.4 |
| 2022-07-14 6:00 PM  | 19.3 | 20.0 | 20.0 | 19.6 |
| 2022-07-14 7:00 PM  | 17.9 | 18.2 | 18.2 | 18.1 |
| 2022-07-14 8:00 PM  | 17.0 | 17.3 | 17.3 | 17.1 |
| 2022-07-14 9:00 PM  | 16.5 | 16.6 | 16.6 | 16.6 |
| 2022-07-14 10:00 PM | 16.1 | 16.1 | 16.1 | 16.1 |
| 2022-07-14 11:00 PM | 15.6 | 15.5 | 15.5 | 15.6 |
| 2022-07-15 12:00 AM | 15.2 | 15.1 | 15.1 | 15.2 |
| 2022-07-15 1:00 AM  | 14.9 | 14.8 | 14.8 | 14.8 |
| 2022-07-15 2:00 AM  | 14.8 | 14.5 | 14.5 | 14.7 |
| 2022-07-15 3:00 AM  | 14.6 | 14.3 | 14.3 | 14.5 |
| 2022-07-15 4:00 AM  | 14.5 | 14.2 | 14.2 | 14.3 |
| 2022-07-15 5:00 AM  | 14.5 | 14.3 | 14.3 | 14.4 |

|                     |      |      |      |      |
|---------------------|------|------|------|------|
| 2022-07-15 6:00 AM  | 14.4 | 14.1 | 14.1 | 14.3 |
| 2022-07-15 7:00 AM  | 14.3 | 14.0 | 14.0 | 14.2 |
| 2022-07-15 8:00 AM  | 14.3 | 14.1 | 14.1 | 14.2 |
| 2022-07-15 9:00 AM  | 15.0 | 14.8 | 14.8 | 14.9 |
| 2022-07-15 10:00 AM | 15.2 | 15.1 | 15.1 | 15.2 |
| 2022-07-15 11:00 AM | 15.9 | 15.9 | 15.9 | 15.9 |
| 2022-07-15 12:00 PM | 18.5 | 19.4 | 19.4 | 18.9 |
| 2022-07-15 1:00 PM  | 20.1 | 21.2 | 21.2 | 20.7 |
| 2022-07-15 2:00 PM  | 20.9 | 20.5 | 20.5 | 20.7 |
| 2022-07-15 3:00 PM  | 20.6 | 20.8 | 20.8 | 20.7 |
| 2022-07-15 4:00 PM  | 19.7 | 21.5 | 21.5 | 20.6 |
| 2022-07-15 5:00 PM  | 19.6 | 21.2 | 21.2 | 20.4 |
| 2022-07-15 6:00 PM  | 19.4 | 19.7 | 19.7 | 19.6 |
| 2022-07-15 7:00 PM  | 18.4 | 18.8 | 18.8 | 18.6 |
| 2022-07-15 8:00 PM  | 18.2 | 18.7 | 18.7 | 18.5 |
| 2022-07-15 9:00 PM  | 17.8 | 18.1 | 18.1 | 17.9 |
| 2022-07-15 10:00 PM | 17.4 | 17.6 | 17.6 | 17.5 |
| 2022-07-15 11:00 PM | 16.8 | 16.9 | 16.9 | 16.8 |
| 2022-07-16 12:00 AM | 16.3 | 16.1 | 16.1 | 16.2 |
| 2022-07-16 1:00 AM  | 15.9 | 15.7 | 15.7 | 15.8 |
| 2022-07-16 2:00 AM  | 15.8 | 15.5 | 15.5 | 15.7 |
| 2022-07-16 3:00 AM  | 15.3 | 15.2 | 15.2 | 15.3 |
| 2022-07-16 4:00 AM  | 15.1 | 14.9 | 14.9 | 15.0 |
| 2022-07-16 5:00 AM  | 14.9 | 14.7 | 14.7 | 14.8 |
| 2022-07-16 6:00 AM  | 14.9 | 14.7 | 14.7 | 14.8 |
| 2022-07-16 7:00 AM  | 14.8 | 14.5 | 14.5 | 14.7 |
| 2022-07-16 8:00 AM  | 14.8 | 14.6 | 14.6 | 14.7 |
| 2022-07-16 9:00 AM  | 15.4 | 15.3 | 15.3 | 15.3 |
| 2022-07-16 10:00 AM | 16.4 | 16.5 | 16.5 | 16.4 |
| 2022-07-16 11:00 AM | 17.6 | 17.8 | 17.8 | 17.7 |
| 2022-07-16 12:00 PM | 19.9 | 21.1 | 21.1 | 20.5 |
| 2022-07-16 1:00 PM  | 20.4 | 21.5 | 21.5 | 20.9 |
| 2022-07-16 2:00 PM  | 21.6 | 21.3 | 21.3 | 21.4 |
| 2022-07-16 3:00 PM  | 21.2 | 21.2 | 21.2 | 21.2 |
| 2022-07-16 4:00 PM  | 20.6 | 22.1 | 22.1 | 21.4 |
| 2022-07-16 5:00 PM  | 20.8 | 22.3 | 22.3 | 21.5 |
| 2022-07-16 6:00 PM  | 21.0 | 21.4 | 21.4 | 21.2 |
| 2022-07-16 7:00 PM  | 19.7 | 19.9 | 19.9 | 19.8 |
| 2022-07-16 8:00 PM  | 18.9 | 19.1 | 19.1 | 19.0 |
| 2022-07-16 9:00 PM  | 18.4 | 18.5 | 18.5 | 18.4 |
| 2022-07-16 10:00 PM | 17.8 | 17.9 | 17.9 | 17.8 |
| 2022-07-16 11:00 PM | 17.2 | 17.1 | 17.1 | 17.2 |
| 2022-07-17 12:00 AM | 16.8 | 16.7 | 16.7 | 16.8 |

|                     |      |      |      |      |
|---------------------|------|------|------|------|
| 2022-07-17 1:00 AM  | 16.4 | 16.3 | 16.3 | 16.3 |
| 2022-07-17 2:00 AM  | 16.1 | 16.0 | 16.0 | 16.1 |
| 2022-07-17 3:00 AM  | 15.8 | 15.6 | 15.6 | 15.7 |
| 2022-07-17 4:00 AM  | 15.5 | 15.3 | 15.3 | 15.4 |
| 2022-07-17 5:00 AM  | 15.2 | 15.0 | 15.0 | 15.1 |
| 2022-07-17 6:00 AM  | 15.1 | 14.8 | 14.8 | 15.0 |
| 2022-07-17 7:00 AM  | 15.0 | 14.6 | 14.6 | 14.8 |
| 2022-07-17 8:00 AM  | 15.0 | 14.7 | 14.7 | 14.8 |
| 2022-07-17 9:00 AM  | 15.4 | 15.2 | 15.2 | 15.3 |
| 2022-07-17 10:00 AM | 16.0 | 15.8 | 15.8 | 15.9 |
| 2022-07-17 11:00 AM | 16.6 | 16.2 | 16.2 | 16.4 |
| 2022-07-17 12:00 PM | 18.2 | 18.3 | 18.3 | 18.3 |
| 2022-07-17 1:00 PM  | 19.6 | 20.0 | 20.0 | 19.8 |
| 2022-07-17 2:00 PM  | 21.3 | 20.8 | 20.8 | 21.0 |
| 2022-07-17 3:00 PM  | 20.7 | 20.7 | 20.7 | 20.7 |
| 2022-07-17 4:00 PM  | 19.5 | 20.7 | 20.7 | 20.1 |
| 2022-07-17 5:00 PM  | 18.7 | 19.8 | 19.8 | 19.3 |
| 2022-07-17 6:00 PM  | 19.0 | 19.3 | 19.3 | 19.1 |
| 2022-07-17 7:00 PM  | 17.7 | 17.6 | 17.6 | 17.7 |
| 2022-07-17 8:00 PM  | 17.1 | 17.0 | 17.0 | 17.1 |
| 2022-07-17 9:00 PM  | 16.7 | 16.6 | 16.6 | 16.7 |
| 2022-07-17 10:00 PM | 16.2 | 16.0 | 16.0 | 16.1 |
| 2022-07-17 11:00 PM | 15.9 | 15.6 | 15.6 | 15.8 |
| 2022-07-18 12:00 AM | 15.8 | 15.5 | 15.5 | 15.7 |
| 2022-07-18 1:00 AM  | 15.8 | 15.4 | 15.4 | 15.6 |
| 2022-07-18 2:00 AM  | 15.6 | 15.2 | 15.2 | 15.4 |
| 2022-07-18 3:00 AM  | 15.6 | 15.3 | 15.3 | 15.5 |
| 2022-07-18 4:00 AM  | 15.4 | 15.2 | 15.2 | 15.3 |
| 2022-07-18 5:00 AM  | 15.5 | 15.3 | 15.3 | 15.4 |
| 2022-07-18 6:00 AM  | 15.6 | 15.4 | 15.4 | 15.5 |
| 2022-07-18 7:00 AM  | 15.8 | 15.7 | 15.7 | 15.8 |
| 2022-07-18 8:00 AM  | 15.7 | 15.6 | 15.6 | 15.7 |
| 2022-07-18 9:00 AM  | 16.3 | 16.3 | 16.3 | 16.3 |
| 2022-07-18 10:00 AM | 17.2 | 17.3 | 17.3 | 17.3 |
| 2022-07-18 11:00 AM | 18.2 | 18.5 | 18.5 | 18.4 |
| 2022-07-18 12:00 PM | 21.1 | 22.7 | 22.7 | 21.9 |
| 2022-07-18 1:00 PM  | 23.4 | 25.5 | 25.5 | 24.4 |
| 2022-07-18 2:00 PM  | 25.1 | 25.7 | 25.7 | 25.4 |
| 2022-07-18 3:00 PM  | 24.0 | 24.9 | 24.9 | 24.4 |
| 2022-07-18 4:00 PM  | 24.2 | 26.1 | 26.1 | 25.2 |
| 2022-07-18 5:00 PM  | 24.1 | 25.7 | 25.7 | 24.9 |
| 2022-07-18 6:00 PM  | 23.9 | 25.1 | 25.1 | 24.5 |
| 2022-07-18 7:00 PM  | 22.6 | 24.5 | 24.5 | 23.6 |

|                     |      |      |      |      |
|---------------------|------|------|------|------|
| 2022-07-18 8:00 PM  | 22.2 | 23.1 | 23.1 | 22.7 |
| 2022-07-18 9:00 PM  | 21.9 | 22.4 | 22.4 | 22.1 |
| 2022-07-18 10:00 PM | 21.2 | 21.6 | 21.6 | 21.4 |
| 2022-07-18 11:00 PM | 20.6 | 21.1 | 21.1 | 20.9 |
| 2022-07-19 12:00 AM | 20.0 | 20.3 | 20.3 | 20.1 |
| 2022-07-19 1:00 AM  | 19.9 | 20.1 | 20.1 | 20.0 |
| 2022-07-19 2:00 AM  | 19.9 | 20.1 | 20.1 | 20.0 |
| 2022-07-19 3:00 AM  | 19.7 | 19.8 | 19.8 | 19.8 |
| 2022-07-19 4:00 AM  | 19.6 | 19.8 | 19.8 | 19.7 |
| 2022-07-19 5:00 AM  | 19.3 | 19.6 | 19.6 | 19.4 |
| 2022-07-19 6:00 AM  | 19.2 | 19.3 | 19.3 | 19.3 |
| 2022-07-19 7:00 AM  | 19.0 | 19.2 | 19.2 | 19.1 |
| 2022-07-19 8:00 AM  | 19.0 | 19.1 | 19.1 | 19.1 |
| 2022-07-19 9:00 AM  | 18.9 | 19.0 | 19.0 | 18.9 |
| 2022-07-19 10:00 AM | 18.9 | 19.0 | 19.0 | 18.9 |
| 2022-07-19 11:00 AM | 18.8 | 18.8 | 18.8 | 18.8 |
| 2022-07-19 12:00 PM | 18.3 | 18.3 | 18.3 | 18.3 |
| 2022-07-19 1:00 PM  | 17.7 | 17.2 | 17.2 | 17.5 |
| 2022-07-19 2:00 PM  | 17.9 | 17.6 | 17.6 | 17.8 |
| 2022-07-19 3:00 PM  | 18.1 | 17.9 | 17.9 | 18.0 |
| 2022-07-19 4:00 PM  | 17.6 | 17.3 | 17.3 | 17.4 |
| 2022-07-19 5:00 PM  | 17.3 | 16.9 | 16.9 | 17.1 |
| 2022-07-19 6:00 PM  | 17.8 | 17.4 | 17.4 | 17.6 |
| 2022-07-19 7:00 PM  | 18.0 | 17.7 | 17.7 | 17.9 |
| 2022-07-19 8:00 PM  | 17.9 | 17.6 | 17.6 | 17.8 |
| 2022-07-19 9:00 PM  | 17.5 | 17.2 | 17.2 | 17.4 |
| 2022-07-19 10:00 PM | 17.2 | 16.8 | 16.8 | 17.0 |
| 2022-07-19 11:00 PM | 16.9 | 16.5 | 16.5 | 16.7 |
| 2022-07-20 12:00 AM | 16.8 | 16.5 | 16.5 | 16.6 |
| 2022-07-20 1:00 AM  | 16.9 | 16.6 | 16.6 | 16.8 |
| 2022-07-20 2:00 AM  | 16.8 | 16.5 | 16.5 | 16.6 |
| 2022-07-20 3:00 AM  | 16.6 | 16.4 | 16.4 | 16.5 |
| 2022-07-20 4:00 AM  | 16.5 | 16.2 | 16.2 | 16.4 |
| 2022-07-20 5:00 AM  | 16.3 | 15.9 | 15.9 | 16.1 |
| 2022-07-20 6:00 AM  | 15.8 | 15.5 | 15.5 | 15.7 |
| 2022-07-20 7:00 AM  | 15.5 | 15.2 | 15.2 | 15.3 |
| 2022-07-20 8:00 AM  | 15.5 | 15.2 | 15.2 | 15.3 |
| 2022-07-20 9:00 AM  | 16.1 | 15.9 | 15.9 | 16.0 |
| 2022-07-20 10:00 AM | 16.7 | 16.5 | 16.5 | 16.6 |
| 2022-07-20 11:00 AM | 17.7 | 17.9 | 17.9 | 17.8 |
| 2022-07-20 12:00 PM | 19.1 | 19.4 | 19.4 | 19.3 |
| 2022-07-20 1:00 PM  | 19.5 | 19.8 | 19.8 | 19.6 |
| 2022-07-20 2:00 PM  | 19.5 | 19.8 | 19.8 | 19.6 |

|                     |      |      |      |      |
|---------------------|------|------|------|------|
| 2022-07-20 3:00 PM  | 19.4 | 19.6 | 19.6 | 19.5 |
| 2022-07-20 4:00 PM  | 19.3 | 20.0 | 20.0 | 19.6 |
| 2022-07-20 5:00 PM  | 19.2 | 19.8 | 19.8 | 19.5 |
| 2022-07-20 6:00 PM  | 19.3 | 19.9 | 19.9 | 19.6 |
| 2022-07-20 7:00 PM  | 19.4 | 20.1 | 20.1 | 19.8 |
| 2022-07-20 8:00 PM  | 19.4 | 20.3 | 20.3 | 19.8 |
| 2022-07-20 9:00 PM  | 19.4 | 20.3 | 20.3 | 19.8 |
| 2022-07-20 10:00 PM | 19.3 | 19.9 | 19.9 | 19.6 |
| 2022-07-20 11:00 PM | 18.7 | 19.0 | 19.0 | 18.9 |
| 2022-07-21 12:00 AM | 18.2 | 18.4 | 18.4 | 18.3 |
| 2022-07-21 1:00 AM  | 17.9 | 18.0 | 18.0 | 17.9 |
| 2022-07-21 2:00 AM  | 17.5 | 17.7 | 17.7 | 17.6 |
| 2022-07-21 3:00 AM  | 17.3 | 17.4 | 17.4 | 17.3 |
| 2022-07-21 4:00 AM  | 17.4 | 17.6 | 17.6 | 17.5 |
| 2022-07-21 5:00 AM  | 17.4 | 17.5 | 17.5 | 17.4 |
| 2022-07-21 6:00 AM  | 17.3 | 17.5 | 17.5 | 17.4 |
| 2022-07-21 7:00 AM  | 17.2 | 17.3 | 17.3 | 17.3 |
| 2022-07-21 8:00 AM  | 17.0 | 17.2 | 17.2 | 17.1 |
| 2022-07-21 9:00 AM  | 17.3 | 17.7 | 17.7 | 17.5 |
| 2022-07-21 10:00 AM | 17.7 | 18.6 | 18.6 | 18.2 |
| 2022-07-21 11:00 AM | 18.3 | 19.8 | 19.8 | 19.0 |
| 2022-07-21 12:00 PM | 20.1 | 22.5 | 22.5 | 21.3 |
| 2022-07-21 1:00 PM  | 21.0 | 23.1 | 23.1 | 22.1 |
| 2022-07-21 2:00 PM  | 21.5 | 22.8 | 22.8 | 22.1 |
| 2022-07-21 3:00 PM  | 21.8 | 23.7 | 23.7 | 22.8 |
| 2022-07-21 4:00 PM  | 21.5 | 24.0 | 24.0 | 22.8 |
| 2022-07-21 5:00 PM  | 21.8 | 23.8 | 23.8 | 22.8 |
| 2022-07-21 6:00 PM  | 20.9 | 21.9 | 21.9 | 21.4 |
| 2022-07-21 7:00 PM  | 19.6 | 20.2 | 20.2 | 19.9 |
| 2022-07-21 8:00 PM  | 19.3 | 19.6 | 19.6 | 19.4 |
| 2022-07-21 9:00 PM  | 19.1 | 19.2 | 19.2 | 19.2 |
| 2022-07-21 10:00 PM | 18.7 | 18.7 | 18.7 | 18.7 |
| 2022-07-21 11:00 PM | 17.9 | 17.8 | 17.8 | 17.8 |
| 2022-07-22 12:00 AM | 17.3 | 17.0 | 17.0 | 17.1 |
| 2022-07-22 1:00 AM  | 16.9 | 16.6 | 16.6 | 16.8 |
| 2022-07-22 2:00 AM  | 16.6 | 16.3 | 16.3 | 16.4 |
| 2022-07-22 3:00 AM  | 16.3 | 16.0 | 16.0 | 16.1 |
| 2022-07-22 4:00 AM  | 16.0 | 15.7 | 15.7 | 15.8 |
| 2022-07-22 5:00 AM  | 15.7 | 15.4 | 15.4 | 15.5 |
| 2022-07-22 6:00 AM  | 15.5 | 15.1 | 15.1 | 15.3 |
| 2022-07-22 7:00 AM  | 15.3 | 15.0 | 15.0 | 15.2 |
| 2022-07-22 8:00 AM  | 15.4 | 15.0 | 15.0 | 15.2 |
| 2022-07-22 9:00 AM  | 16.0 | 15.7 | 15.7 | 15.8 |



|                     |      |      |      |      |
|---------------------|------|------|------|------|
| 2022-07-22 10:00 AM | 17.0 | 16.9 | 16.9 | 16.9 |
| 2022-07-22 11:00 AM | 18.1 | 18.2 | 18.2 | 18.2 |
| 2022-07-22 12:00 PM | 20.4 | 21.7 | 21.7 | 21.1 |
| 2022-07-22 1:00 PM  | 21.8 | 23.9 | 23.9 | 22.8 |
| 2022-07-22 2:00 PM  | 22.9 | 24.0 | 24.0 | 23.4 |
| 2022-07-22 3:00 PM  | 23.1 | 24.7 | 24.7 | 23.9 |
| 2022-07-22 4:00 PM  | 21.1 | 23.8 | 23.8 | 22.4 |
| 2022-07-22 5:00 PM  | 20.6 | 23.0 | 23.0 | 21.8 |
| 2022-07-22 6:00 PM  | 20.0 | 22.2 | 22.2 | 21.1 |
| 2022-07-22 7:00 PM  | 20.0 | 21.6 | 21.6 | 20.8 |
| 2022-07-22 8:00 PM  | 19.9 | 21.0 | 21.0 | 20.4 |
| 2022-07-22 9:00 PM  | 19.7 | 21.1 | 21.1 | 20.4 |
| 2022-07-22 10:00 PM | 19.3 | 19.8 | 19.8 | 19.5 |
| 2022-07-22 11:00 PM | 18.6 | 18.9 | 18.9 | 18.8 |
| 2022-07-23 12:00 AM | 18.3 | 18.4 | 18.4 | 18.3 |
| 2022-07-23 1:00 AM  | 17.8 | 17.8 | 17.8 | 17.8 |
| 2022-07-23 2:00 AM  | 17.5 | 17.4 | 17.4 | 17.4 |
| 2022-07-23 3:00 AM  | 17.0 | 16.8 | 16.8 | 16.9 |
| 2022-07-23 4:00 AM  | 16.5 | 16.4 | 16.4 | 16.4 |
| 2022-07-23 5:00 AM  | 16.3 | 16.0 | 16.0 | 16.1 |
| 2022-07-23 6:00 AM  | 16.1 | 15.8 | 15.8 | 16.0 |
| 2022-07-23 7:00 AM  | 16.0 | 15.7 | 15.7 | 15.8 |
| 2022-07-23 8:00 AM  | 16.1 | 15.9 | 15.9 | 16.0 |
| 2022-07-23 9:00 AM  | 16.7 | 16.4 | 16.4 | 16.6 |
| 2022-07-23 10:00 AM | 17.4 | 17.2 | 17.2 | 17.3 |
| 2022-07-23 11:00 AM | 18.1 | 18.1 | 18.1 | 18.1 |
| 2022-07-23 12:00 PM | 20.1 | 21.3 | 21.3 | 20.7 |
| 2022-07-23 1:00 PM  | 21.4 | 22.6 | 22.6 | 22.0 |
| 2022-07-23 2:00 PM  | 20.6 | 21.0 | 21.0 | 20.8 |
| 2022-07-23 3:00 PM  | 20.3 | 20.7 | 20.7 | 20.5 |
| 2022-07-23 4:00 PM  | 19.2 | 19.4 | 19.4 | 19.3 |
| 2022-07-23 5:00 PM  | 19.5 | 19.7 | 19.7 | 19.6 |
| 2022-07-23 6:00 PM  | 19.1 | 19.1 | 19.1 | 19.1 |
| 2022-07-23 7:00 PM  | 18.5 | 18.4 | 18.4 | 18.4 |
| 2022-07-23 8:00 PM  | 18.2 | 18.1 | 18.1 | 18.2 |
| 2022-07-23 9:00 PM  | 18.1 | 18.0 | 18.0 | 18.1 |
| 2022-07-23 10:00 PM | 18.0 | 17.9 | 17.9 | 17.9 |
| 2022-07-23 11:00 PM | 17.8 | 17.7 | 17.7 | 17.8 |
| 2022-07-24 12:00 AM | 17.6 | 17.5 | 17.5 | 17.6 |
| 2022-07-24 1:00 AM  | 17.3 | 17.1 | 17.1 | 17.2 |
| 2022-07-24 2:00 AM  | 17.4 | 17.3 | 17.3 | 17.3 |
| 2022-07-24 3:00 AM  | 17.2 | 17.1 | 17.1 | 17.2 |
| 2022-07-24 4:00 AM  | 17.1 | 17.0 | 17.0 | 17.1 |

|                     |      |      |      |      |
|---------------------|------|------|------|------|
| 2022-07-24 5:00 AM  | 17.0 | 16.8 | 16.8 | 16.9 |
| 2022-07-24 6:00 AM  | 16.9 | 16.8 | 16.8 | 16.8 |
| 2022-07-24 7:00 AM  | 16.8 | 16.7 | 16.7 | 16.8 |
| 2022-07-24 8:00 AM  | 16.7 | 16.5 | 16.5 | 16.6 |
| 2022-07-24 9:00 AM  | 16.8 | 16.7 | 16.7 | 16.8 |
| 2022-07-24 10:00 AM | 17.0 | 16.9 | 16.9 | 16.9 |
| 2022-07-24 11:00 AM | 17.3 | 17.5 | 17.5 | 17.4 |
| 2022-07-24 12:00 PM | 17.2 | 17.4 | 17.4 | 17.3 |
| 2022-07-24 1:00 PM  | 17.1 | 17.4 | 17.4 | 17.3 |
| 2022-07-24 2:00 PM  | 16.8 | 17.2 | 17.2 | 17.0 |
| 2022-07-24 3:00 PM  | 16.2 | 16.3 | 16.3 | 16.3 |
| 2022-07-24 4:00 PM  | 15.7 | 15.6 | 15.6 | 15.7 |
| 2022-07-24 5:00 PM  | 15.9 | 16.1 | 16.1 | 16.0 |
| 2022-07-24 6:00 PM  | 15.9 | 16.0 | 16.0 | 15.9 |
| 2022-07-24 7:00 PM  | 15.6 | 15.6 | 15.6 | 15.6 |
| 2022-07-24 8:00 PM  | 15.6 | 15.5 | 15.5 | 15.6 |
| 2022-07-24 9:00 PM  | 15.5 | 15.3 | 15.3 | 15.4 |
| 2022-07-24 10:00 PM | 15.2 | 14.8 | 14.8 | 15.0 |
| 2022-07-24 11:00 PM | 15.0 | 14.6 | 14.6 | 14.8 |
| 2022-07-25 12:00 AM | 15.1 | 14.7 | 14.7 | 14.9 |
| 2022-07-25 1:00 AM  | 15.1 | 14.7 | 14.7 | 14.9 |
| 2022-07-25 2:00 AM  | 14.9 | 14.5 | 14.5 | 14.7 |
| 2022-07-25 3:00 AM  | 14.8 | 14.4 | 14.4 | 14.6 |
| 2022-07-25 4:00 AM  | 14.5 | 14.1 | 14.1 | 14.3 |
| 2022-07-25 5:00 AM  | 14.0 | 13.5 | 13.5 | 13.8 |
| 2022-07-25 6:00 AM  | 13.7 | 13.3 | 13.3 | 13.5 |
| 2022-07-25 7:00 AM  | 13.5 | 13.0 | 13.0 | 13.3 |
| 2022-07-25 8:00 AM  | 13.6 | 13.1 | 13.1 | 13.4 |
| 2022-07-25 9:00 AM  | 14.0 | 13.6 | 13.6 | 13.8 |
| 2022-07-25 10:00 AM | 14.8 | 14.6 | 14.6 | 14.7 |
| 2022-07-25 11:00 AM | 15.6 | 15.8 | 15.8 | 15.7 |
| 2022-07-25 12:00 PM | 17.0 | 18.3 | 18.3 | 17.6 |
| 2022-07-25 1:00 PM  | 18.4 | 20.2 | 20.2 | 19.3 |
| 2022-07-25 2:00 PM  | 19.7 | 20.7 | 20.7 | 20.2 |
| 2022-07-25 3:00 PM  | 19.4 | 20.7 | 20.7 | 20.1 |
| 2022-07-25 4:00 PM  | 19.6 | 21.5 | 21.5 | 20.6 |
| 2022-07-25 5:00 PM  | 19.5 | 21.1 | 21.1 | 20.3 |
| 2022-07-25 6:00 PM  | 19.7 | 20.5 | 20.5 | 20.1 |
| 2022-07-25 7:00 PM  | 18.7 | 19.3 | 19.3 | 19.0 |
| 2022-07-25 8:00 PM  | 18.1 | 18.7 | 18.7 | 18.4 |
| 2022-07-25 9:00 PM  | 17.8 | 18.0 | 18.0 | 17.9 |
| 2022-07-25 10:00 PM | 17.2 | 17.2 | 17.2 | 17.2 |
| 2022-07-25 11:00 PM | 16.6 | 16.5 | 16.5 | 16.6 |

|                     |      |      |      |      |
|---------------------|------|------|------|------|
| 2022-07-26 12:00 AM | 16.0 | 15.8 | 15.8 | 15.9 |
| 2022-07-26 1:00 AM  | 15.4 | 15.1 | 15.1 | 15.3 |
| 2022-07-26 2:00 AM  | 15.2 | 14.8 | 14.8 | 15.0 |
| 2022-07-26 3:00 AM  | 14.9 | 14.6 | 14.6 | 14.8 |
| 2022-07-26 4:00 AM  | 14.7 | 14.4 | 14.4 | 14.5 |
| 2022-07-26 5:00 AM  | 14.3 | 14.0 | 14.0 | 14.2 |
| 2022-07-26 6:00 AM  | 14.3 | 13.9 | 13.9 | 14.1 |
| 2022-07-26 7:00 AM  | 14.2 | 13.7 | 13.7 | 13.9 |
| 2022-07-26 8:00 AM  | 14.3 | 13.9 | 13.9 | 14.1 |
| 2022-07-26 9:00 AM  | 14.9 | 14.7 | 14.7 | 14.8 |
| 2022-07-26 10:00 AM | 15.8 | 15.5 | 15.5 | 15.7 |
| 2022-07-26 11:00 AM | 16.4 | 16.2 | 16.2 | 16.3 |
| 2022-07-26 12:00 PM | 17.1 | 17.0 | 17.0 | 17.1 |
| 2022-07-26 1:00 PM  | 17.8 | 17.9 | 17.9 | 17.8 |
| 2022-07-26 2:00 PM  | 19.5 | 19.9 | 19.9 | 19.7 |
| 2022-07-26 3:00 PM  | 19.0 | 19.4 | 19.4 | 19.2 |
| 2022-07-26 4:00 PM  | 18.7 | 19.0 | 19.0 | 18.9 |
| 2022-07-26 5:00 PM  | 19.0 | 19.3 | 19.3 | 19.1 |
| 2022-07-26 6:00 PM  | 19.1 | 19.3 | 19.3 | 19.2 |
| 2022-07-26 7:00 PM  | 18.7 | 18.9 | 18.9 | 18.8 |
| 2022-07-26 8:00 PM  | 18.4 | 18.6 | 18.6 | 18.5 |
| 2022-07-26 9:00 PM  | 18.1 | 18.1 | 18.1 | 18.1 |
| 2022-07-26 10:00 PM | 18.0 | 18.1 | 18.1 | 18.1 |
| 2022-07-26 11:00 PM | 17.6 | 17.6 | 17.6 | 17.6 |
| 2022-07-27 12:00 AM | 17.3 | 17.3 | 17.3 | 17.3 |
| 2022-07-27 1:00 AM  | 17.3 | 17.3 | 17.3 | 17.3 |
| 2022-07-27 2:00 AM  | 17.1 | 17.2 | 17.2 | 17.2 |
| 2022-07-27 3:00 AM  | 17.1 | 17.1 | 17.1 | 17.1 |
| 2022-07-27 4:00 AM  | 16.7 | 16.6 | 16.6 | 16.7 |
| 2022-07-27 5:00 AM  | 16.2 | 16.1 | 16.1 | 16.2 |
| 2022-07-27 6:00 AM  | 15.9 | 15.9 | 15.9 | 15.9 |
| 2022-07-27 7:00 AM  | 15.7 | 15.6 | 15.6 | 15.7 |
| 2022-07-27 8:00 AM  | 15.8 | 15.6 | 15.6 | 15.7 |
| 2022-07-27 9:00 AM  | 16.1 | 16.0 | 16.0 | 16.1 |
| 2022-07-27 10:00 AM | 16.5 | 16.5 | 16.5 | 16.5 |
| 2022-07-27 11:00 AM | 17.0 | 17.0 | 17.0 | 17.0 |
| 2022-07-27 12:00 PM | 18.8 | 19.7 | 19.7 | 19.3 |
| 2022-07-27 1:00 PM  | 20.7 | 22.1 | 22.1 | 21.4 |
| 2022-07-27 2:00 PM  | 21.6 | 22.1 | 22.1 | 21.9 |
| 2022-07-27 3:00 PM  | 20.4 | 21.2 | 21.2 | 20.8 |
| 2022-07-27 4:00 PM  | 20.8 | 22.5 | 22.5 | 21.6 |
| 2022-07-27 5:00 PM  | 20.7 | 22.0 | 22.0 | 21.4 |
| 2022-07-27 6:00 PM  | 20.1 | 20.7 | 20.7 | 20.4 |

|                     |      |      |      |      |
|---------------------|------|------|------|------|
| 2022-07-27 7:00 PM  | 18.4 | 18.7 | 18.7 | 18.6 |
| 2022-07-27 8:00 PM  | 17.7 | 17.7 | 17.7 | 17.7 |
| 2022-07-27 9:00 PM  | 16.5 | 16.2 | 16.2 | 16.4 |
| 2022-07-27 10:00 PM | 16.6 | 16.3 | 16.3 | 16.4 |
| 2022-07-27 11:00 PM | 16.4 | 16.2 | 16.2 | 16.3 |
| 2022-07-28 12:00 AM | 16.1 | 15.9 | 15.9 | 16.0 |
| 2022-07-28 1:00 AM  | 15.6 | 15.5 | 15.5 | 15.6 |
| 2022-07-28 2:00 AM  | 15.7 | 15.5 | 15.5 | 15.6 |
| 2022-07-28 3:00 AM  | 15.7 | 15.4 | 15.4 | 15.5 |
| 2022-07-28 4:00 AM  | 15.7 | 15.4 | 15.4 | 15.5 |
| 2022-07-28 5:00 AM  | 15.6 | 15.4 | 15.4 | 15.5 |
| 2022-07-28 6:00 AM  | 15.5 | 15.3 | 15.3 | 15.4 |
| 2022-07-28 7:00 AM  | 15.3 | 15.0 | 15.0 | 15.2 |
| 2022-07-28 8:00 AM  | 15.2 | 14.9 | 14.9 | 15.0 |
| 2022-07-28 9:00 AM  | 15.4 | 15.1 | 15.1 | 15.3 |
| 2022-07-28 10:00 AM | 15.3 | 15.0 | 15.0 | 15.2 |
| 2022-07-28 11:00 AM | 15.6 | 15.6 | 15.6 | 15.6 |
| 2022-07-28 12:00 PM | 16.1 | 16.4 | 16.4 | 16.3 |
| 2022-07-28 1:00 PM  | 17.0 | 17.8 | 17.8 | 17.4 |
| 2022-07-28 2:00 PM  | 17.7 | 18.4 | 18.4 | 18.1 |
| 2022-07-28 3:00 PM  | 17.2 | 17.9 | 17.9 | 17.6 |
| 2022-07-28 4:00 PM  | 16.9 | 17.2 | 17.2 | 17.1 |
| 2022-07-28 5:00 PM  | 17.8 | 18.7 | 18.7 | 18.3 |
| 2022-07-28 6:00 PM  | 17.7 | 18.2 | 18.2 | 18.0 |
| 2022-07-28 7:00 PM  | 17.1 | 17.4 | 17.4 | 17.3 |
| 2022-07-28 8:00 PM  | 17.0 | 17.3 | 17.3 | 17.1 |
| 2022-07-28 9:00 PM  | 16.9 | 17.0 | 17.0 | 16.9 |
| 2022-07-28 10:00 PM | 16.4 | 16.3 | 16.3 | 16.3 |
| 2022-07-28 11:00 PM | 16.3 | 16.2 | 16.2 | 16.3 |
| 2022-07-29 12:00 AM | 16.0 | 15.9 | 15.9 | 15.9 |
| 2022-07-29 1:00 AM  | 15.6 | 15.5 | 15.5 | 15.6 |
| 2022-07-29 2:00 AM  | 15.4 | 15.3 | 15.3 | 15.3 |
| 2022-07-29 3:00 AM  | 15.5 | 15.3 | 15.3 | 15.4 |
| 2022-07-29 4:00 AM  | 15.5 | 15.4 | 15.4 | 15.4 |
| 2022-07-29 5:00 AM  | 15.4 | 15.2 | 15.2 | 15.3 |
| 2022-07-29 6:00 AM  | 15.3 | 15.1 | 15.1 | 15.2 |
| 2022-07-29 7:00 AM  | 15.5 | 15.2 | 15.2 | 15.3 |
| 2022-07-29 8:00 AM  | 15.4 | 15.3 | 15.3 | 15.3 |
| 2022-07-29 9:00 AM  | 15.3 | 15.2 | 15.2 | 15.3 |
| 2022-07-29 10:00 AM | 15.8 | 16.1 | 16.1 | 16.0 |
| 2022-07-29 11:00 AM | 16.4 | 17.4 | 17.4 | 16.9 |
| 2022-07-29 12:00 PM | 17.2 | 18.3 | 18.3 | 17.8 |
| 2022-07-29 1:00 PM  | 17.8 | 18.8 | 18.8 | 18.3 |

|                     |      |      |      |      |
|---------------------|------|------|------|------|
| 2022-07-29 2:00 PM  | 18.1 | 18.8 | 18.8 | 18.4 |
| 2022-07-29 3:00 PM  | 18.1 | 18.6 | 18.6 | 18.4 |
| 2022-07-29 4:00 PM  | 18.5 | 18.6 | 18.6 | 18.6 |
| 2022-07-29 5:00 PM  | 18.0 | 17.8 | 17.8 | 17.9 |
| 2022-07-29 6:00 PM  | 17.5 | 17.3 | 17.3 | 17.4 |
| 2022-07-29 7:00 PM  | 17.5 | 17.4 | 17.4 | 17.4 |
| 2022-07-29 8:00 PM  | 16.8 | 17.0 | 17.0 | 16.9 |
| 2022-07-29 9:00 PM  | 16.8 | 16.8 | 16.8 | 16.8 |
| 2022-07-29 10:00 PM | 16.4 | 16.2 | 16.2 | 16.3 |
| 2022-07-29 11:00 PM | 16.3 | 16.2 | 16.2 | 16.3 |
| 2022-07-30 12:00 AM | 16.1 | 16.0 | 16.0 | 16.1 |
| 2022-07-30 1:00 AM  | 15.8 | 15.5 | 15.5 | 15.7 |
| 2022-07-30 2:00 AM  | 15.4 | 15.1 | 15.1 | 15.3 |
| 2022-07-30 3:00 AM  | 15.1 | 14.7 | 14.7 | 14.9 |
| 2022-07-30 4:00 AM  | 14.7 | 14.4 | 14.4 | 14.5 |
| 2022-07-30 5:00 AM  | 14.4 | 14.0 | 14.0 | 14.2 |
| 2022-07-30 6:00 AM  | 14.3 | 13.9 | 13.9 | 14.1 |
| 2022-07-30 7:00 AM  | 14.2 | 13.7 | 13.7 | 13.9 |
| 2022-07-30 8:00 AM  | 14.3 | 13.9 | 13.9 | 14.1 |
| 2022-07-30 9:00 AM  | 14.8 | 14.6 | 14.6 | 14.7 |
| 2022-07-30 10:00 AM | 15.7 | 15.5 | 15.5 | 15.6 |
| 2022-07-30 11:00 AM | 16.8 | 16.8 | 16.8 | 16.8 |
| 2022-07-30 12:00 PM | 19.5 | 20.6 | 20.6 | 20.1 |
| 2022-07-30 1:00 PM  | 21.3 | 22.7 | 22.7 | 22.0 |
| 2022-07-30 2:00 PM  | 21.1 | 21.8 | 21.8 | 21.4 |
| 2022-07-30 3:00 PM  | 21.1 | 22.4 | 22.4 | 21.8 |
| 2022-07-30 4:00 PM  | 21.3 | 23.2 | 23.2 | 22.3 |
| 2022-07-30 5:00 PM  | 21.7 | 23.7 | 23.7 | 22.7 |
| 2022-07-30 6:00 PM  | 21.7 | 22.8 | 22.8 | 22.3 |
| 2022-07-30 7:00 PM  | 20.5 | 21.1 | 21.1 | 20.8 |
| 2022-07-30 8:00 PM  | 19.7 | 20.2 | 20.2 | 20.0 |
| 2022-07-30 9:00 PM  | 19.2 | 19.6 | 19.6 | 19.4 |
| 2022-07-30 10:00 PM | 18.6 | 18.7 | 18.7 | 18.7 |
| 2022-07-30 11:00 PM | 18.0 | 18.0 | 18.0 | 18.0 |
| 2022-07-31 12:00 AM | 17.5 | 17.4 | 17.4 | 17.4 |
| 2022-07-31 1:00 AM  | 17.1 | 17.0 | 17.0 | 17.1 |
| 2022-07-31 2:00 AM  | 16.9 | 16.7 | 16.7 | 16.8 |
| 2022-07-31 3:00 AM  | 16.7 | 16.5 | 16.5 | 16.6 |
| 2022-07-31 4:00 AM  | 16.5 | 16.3 | 16.3 | 16.4 |
| 2022-07-31 5:00 AM  | 16.2 | 16.0 | 16.0 | 16.1 |
| 2022-07-31 6:00 AM  | 16.3 | 15.9 | 15.9 | 16.1 |
| 2022-07-31 7:00 AM  | 16.0 | 15.7 | 15.7 | 15.8 |
| 2022-07-31 8:00 AM  | 16.0 | 15.8 | 15.8 | 15.9 |

|                     |      |      |      |      |
|---------------------|------|------|------|------|
| 2022-07-31 9:00 AM  | 16.6 | 16.4 | 16.4 | 16.5 |
| 2022-07-31 10:00 AM | 17.1 | 17.0 | 17.0 | 17.1 |
| 2022-07-31 11:00 AM | 17.6 | 17.6 | 17.6 | 17.6 |
| 2022-07-31 12:00 PM | 18.9 | 19.2 | 19.2 | 19.1 |
| 2022-07-31 1:00 PM  | 20.2 | 21.2 | 21.2 | 20.7 |
| 2022-07-31 2:00 PM  | 21.3 | 22.1 | 22.1 | 21.7 |
| 2022-07-31 3:00 PM  | 19.3 | 19.7 | 19.7 | 19.5 |
| 2022-07-31 4:00 PM  | 19.0 | 19.3 | 19.3 | 19.1 |
| 2022-07-31 5:00 PM  | 20.2 | 20.7 | 20.7 | 20.5 |
| 2022-07-31 6:00 PM  | 19.6 | 19.9 | 19.9 | 19.8 |
| 2022-07-31 7:00 PM  | 19.1 | 19.1 | 19.1 | 19.1 |
| 2022-07-31 8:00 PM  | 18.8 | 18.8 | 18.8 | 18.8 |
| 2022-07-31 9:00 PM  | 18.3 | 18.3 | 18.3 | 18.3 |
| 2022-07-31 10:00 PM | 17.8 | 17.6 | 17.6 | 17.7 |
| 2022-07-31 11:00 PM | 17.6 | 17.4 | 17.4 | 17.5 |
| 2022-08-01 12:00 AM | 17.3 | 17.1 | 17.1 | 17.2 |
| 2022-08-01 1:00 AM  | 17.0 | 16.8 | 16.8 | 16.9 |
| 2022-08-01 2:00 AM  | 17.0 | 16.7 | 16.7 | 16.9 |
| 2022-08-01 3:00 AM  | 17.0 | 16.8 | 16.8 | 16.9 |
| 2022-08-01 4:00 AM  | 17.0 | 16.8 | 16.8 | 16.9 |
| 2022-08-01 5:00 AM  | 17.0 | 16.8 | 16.8 | 16.9 |
| 2022-08-01 6:00 AM  | 16.9 | 16.7 | 16.7 | 16.8 |
| 2022-08-01 7:00 AM  | 17.0 | 16.9 | 16.9 | 16.9 |
| 2022-08-01 8:00 AM  | 17.1 | 17.0 | 17.0 | 17.1 |
| 2022-08-01 9:00 AM  | 16.9 | 16.7 | 16.7 | 16.8 |
| 2022-08-01 10:00 AM | 16.6 | 16.5 | 16.5 | 16.6 |
| 2022-08-01 11:00 AM | 16.7 | 16.9 | 16.9 | 16.8 |
| 2022-08-01 12:00 PM | 16.7 | 17.2 | 17.2 | 17.0 |
| 2022-08-01 1:00 PM  | 17.0 | 17.8 | 17.8 | 17.4 |
| 2022-08-01 2:00 PM  | 17.1 | 17.9 | 17.9 | 17.5 |
| 2022-08-01 3:00 PM  | 17.3 | 18.1 | 18.1 | 17.7 |
| 2022-08-01 4:00 PM  | 17.6 | 18.2 | 18.2 | 17.9 |
| 2022-08-01 5:00 PM  | 18.3 | 19.3 | 19.3 | 18.8 |
| 2022-08-01 6:00 PM  | 18.4 | 19.1 | 19.1 | 18.8 |
| 2022-08-01 7:00 PM  | 18.0 | 18.5 | 18.5 | 18.3 |
| 2022-08-01 8:00 PM  | 17.7 | 18.2 | 18.2 | 18.0 |
| 2022-08-01 9:00 PM  | 17.4 | 17.7 | 17.7 | 17.6 |
| 2022-08-01 10:00 PM | 16.7 | 16.6 | 16.6 | 16.7 |
| 2022-08-01 11:00 PM | 16.4 | 16.2 | 16.2 | 16.3 |
| 2022-08-02 12:00 AM | 16.1 | 15.7 | 15.7 | 15.9 |
| 2022-08-02 1:00 AM  | 15.6 | 15.2 | 15.2 | 15.4 |
| 2022-08-02 2:00 AM  | 15.3 | 14.8 | 14.8 | 15.1 |
| 2022-08-02 3:00 AM  | 15.2 | 14.7 | 14.7 | 14.9 |

|                     |      |      |      |      |
|---------------------|------|------|------|------|
| 2022-08-02 4:00 AM  | 14.9 | 14.4 | 14.4 | 14.6 |
| 2022-08-02 5:00 AM  | 14.7 | 14.1 | 14.1 | 14.4 |
| 2022-08-02 6:00 AM  | 14.3 | 14.0 | 14.0 | 14.2 |
| 2022-08-02 7:00 AM  | 14.6 | 14.1 | 14.1 | 14.4 |
| 2022-08-02 8:00 AM  | 14.7 | 14.2 | 14.2 | 14.4 |
| 2022-08-02 9:00 AM  | 15.1 | 14.7 | 14.7 | 14.9 |
| 2022-08-02 10:00 AM | 16.1 | 15.9 | 15.9 | 16.0 |
| 2022-08-02 11:00 AM | 16.5 | 16.4 | 16.4 | 16.4 |
| 2022-08-02 12:00 PM | 18.4 | 19.2 | 19.2 | 18.8 |
| 2022-08-02 1:00 PM  | 19.9 | 21.3 | 21.3 | 20.6 |
| 2022-08-02 2:00 PM  | 21.5 | 22.1 | 22.1 | 21.8 |
| 2022-08-02 3:00 PM  | 21.1 | 22.1 | 22.1 | 21.6 |
| 2022-08-02 4:00 PM  | 20.7 | 22.3 | 22.3 | 21.5 |
| 2022-08-02 5:00 PM  | 19.7 | 20.5 | 20.5 | 20.1 |
| 2022-08-02 6:00 PM  | 18.9 | 19.1 | 19.1 | 19.0 |
| 2022-08-02 7:00 PM  | 18.1 | 18.0 | 18.0 | 18.1 |
| 2022-08-02 8:00 PM  | 17.5 | 17.3 | 17.3 | 17.4 |
| 2022-08-02 9:00 PM  | 17.2 | 17.0 | 17.0 | 17.1 |
| 2022-08-02 10:00 PM | 17.0 | 16.9 | 16.9 | 16.9 |
| 2022-08-02 11:00 PM | 16.7 | 16.5 | 16.5 | 16.6 |
| 2022-08-03 12:00 AM | 16.6 | 16.3 | 16.3 | 16.4 |
| 2022-08-03 1:00 AM  | 16.6 | 16.4 | 16.4 | 16.5 |
| 2022-08-03 2:00 AM  | 16.6 | 16.3 | 16.3 | 16.4 |
| 2022-08-03 3:00 AM  | 16.6 | 16.3 | 16.3 | 16.4 |
| 2022-08-03 4:00 AM  | 16.6 | 16.4 | 16.4 | 16.5 |
| 2022-08-03 5:00 AM  | 16.6 | 16.4 | 16.4 | 16.5 |
| 2022-08-03 6:00 AM  | 16.3 | 16.2 | 16.2 | 16.3 |
| 2022-08-03 7:00 AM  | 16.2 | 16.0 | 16.0 | 16.1 |
| 2022-08-03 8:00 AM  | 16.1 | 15.9 | 15.9 | 16.0 |
| 2022-08-03 9:00 AM  | 16.5 | 16.4 | 16.4 | 16.4 |
| 2022-08-03 10:00 AM | 17.6 | 17.7 | 17.7 | 17.7 |
| 2022-08-03 11:00 AM | 18.6 | 18.8 | 18.8 | 18.7 |
| 2022-08-03 12:00 PM | 19.9 | 20.4 | 20.4 | 20.1 |
| 2022-08-03 1:00 PM  | 19.6 | 19.9 | 19.9 | 19.8 |
| 2022-08-03 2:00 PM  | 20.5 | 21.2 | 21.2 | 20.9 |
| 2022-08-03 3:00 PM  | 20.2 | 21.9 | 21.9 | 21.1 |
| 2022-08-03 4:00 PM  | 20.3 | 22.6 | 22.6 | 21.4 |
| 2022-08-03 5:00 PM  | 20.5 | 22.1 | 22.1 | 21.3 |
| 2022-08-03 6:00 PM  | 20.1 | 20.7 | 20.7 | 20.4 |
| 2022-08-03 7:00 PM  | 19.3 | 19.8 | 19.8 | 19.5 |
| 2022-08-03 8:00 PM  | 19.1 | 19.5 | 19.5 | 19.3 |
| 2022-08-03 9:00 PM  | 18.7 | 19.0 | 19.0 | 18.9 |
| 2022-08-03 10:00 PM | 18.2 | 18.4 | 18.4 | 18.3 |

|                     |      |      |      |      |
|---------------------|------|------|------|------|
| 2022-08-03 11:00 PM | 17.8 | 17.7 | 17.7 | 17.8 |
| 2022-08-04 12:00 AM | 17.6 | 17.4 | 17.4 | 17.5 |
| 2022-08-04 1:00 AM  | 17.3 | 17.1 | 17.1 | 17.2 |
| 2022-08-04 2:00 AM  | 16.9 | 16.6 | 16.6 | 16.8 |
| 2022-08-04 3:00 AM  | 16.5 | 16.2 | 16.2 | 16.4 |
| 2022-08-04 4:00 AM  | 15.8 | 15.3 | 15.3 | 15.6 |
| 2022-08-04 5:00 AM  | 15.3 | 14.8 | 14.8 | 15.1 |
| 2022-08-04 6:00 AM  | 14.9 | 14.3 | 14.3 | 14.6 |
| 2022-08-04 7:00 AM  | 14.5 | 14.1 | 14.1 | 14.3 |
| 2022-08-04 8:00 AM  | 14.5 | 14.0 | 14.0 | 14.3 |
| 2022-08-04 9:00 AM  | 15.0 | 14.6 | 14.6 | 14.8 |
| 2022-08-04 10:00 AM | 16.1 | 15.8 | 15.8 | 16.0 |
| 2022-08-04 11:00 AM | 16.8 | 16.5 | 16.5 | 16.6 |
| 2022-08-04 12:00 PM | 18.4 | 18.5 | 18.5 | 18.4 |
| 2022-08-04 1:00 PM  | 19.4 | 20.4 | 20.4 | 19.9 |
| 2022-08-04 2:00 PM  | 20.8 | 21.5 | 21.5 | 21.1 |
| 2022-08-04 3:00 PM  | 20.0 | 21.4 | 21.4 | 20.7 |
| 2022-08-04 4:00 PM  | 20.1 | 21.9 | 21.9 | 21.0 |
| 2022-08-04 5:00 PM  | 19.9 | 21.5 | 21.5 | 20.7 |
| 2022-08-04 6:00 PM  | 19.7 | 20.6 | 20.6 | 20.2 |
| 2022-08-04 7:00 PM  | 18.6 | 19.1 | 19.1 | 18.9 |
| 2022-08-04 8:00 PM  | 18.1 | 18.4 | 18.4 | 18.3 |
| 2022-08-04 9:00 PM  | 17.8 | 17.9 | 17.9 | 17.8 |
| 2022-08-04 10:00 PM | 17.4 | 17.3 | 17.3 | 17.3 |
| 2022-08-04 11:00 PM | 16.9 | 16.8 | 16.8 | 16.8 |
| 2022-08-05 12:00 AM | 16.6 | 16.3 | 16.3 | 16.4 |
| 2022-08-05 1:00 AM  | 16.1 | 15.8 | 15.8 | 16.0 |
| 2022-08-05 2:00 AM  | 15.8 | 15.4 | 15.4 | 15.6 |
| 2022-08-05 3:00 AM  | 15.6 | 15.1 | 15.1 | 15.4 |
| 2022-08-05 4:00 AM  | 15.4 | 14.8 | 14.8 | 15.1 |
| 2022-08-05 5:00 AM  | 15.2 | 14.8 | 14.8 | 15.0 |
| 2022-08-05 6:00 AM  | 15.2 | 14.7 | 14.7 | 14.9 |
| 2022-08-05 7:00 AM  | 15.0 | 14.5 | 14.5 | 14.8 |
| 2022-08-05 8:00 AM  | 15.2 | 14.8 | 14.8 | 15.0 |
| 2022-08-05 9:00 AM  | 15.6 | 15.3 | 15.3 | 15.5 |
| 2022-08-05 10:00 AM | 16.0 | 15.8 | 15.8 | 15.9 |
| 2022-08-05 11:00 AM | 16.4 | 16.3 | 16.3 | 16.3 |
| 2022-08-05 12:00 PM | 18.4 | 19.1 | 19.1 | 18.8 |
| 2022-08-05 1:00 PM  | 20.3 | 21.8 | 21.8 | 21.0 |
| 2022-08-05 2:00 PM  | 21.5 | 22.5 | 22.5 | 22.0 |
| 2022-08-05 3:00 PM  | 20.6 | 21.5 | 21.5 | 21.1 |
| 2022-08-05 4:00 PM  | 20.9 | 22.9 | 22.9 | 21.9 |
| 2022-08-05 5:00 PM  | 20.8 | 22.3 | 22.3 | 21.5 |



|                     |      |      |      |      |
|---------------------|------|------|------|------|
| 2022-08-05 6:00 PM  | 19.8 | 20.3 | 20.3 | 20.0 |
| 2022-08-05 7:00 PM  | 18.9 | 19.1 | 19.1 | 19.0 |
| 2022-08-05 8:00 PM  | 18.7 | 18.9 | 18.9 | 18.8 |
| 2022-08-05 9:00 PM  | 18.5 | 18.5 | 18.5 | 18.5 |
| 2022-08-05 10:00 PM | 18.0 | 18.0 | 18.0 | 18.0 |
| 2022-08-05 11:00 PM | 17.8 | 17.7 | 17.7 | 17.8 |
| 2022-08-06 12:00 AM | 17.4 | 17.1 | 17.1 | 17.3 |
| 2022-08-06 1:00 AM  | 17.3 | 17.1 | 17.1 | 17.2 |
| 2022-08-06 2:00 AM  | 17.5 | 17.4 | 17.4 | 17.4 |
| 2022-08-06 3:00 AM  | 17.5 | 17.4 | 17.4 | 17.4 |
| 2022-08-06 4:00 AM  | 17.5 | 17.5 | 17.5 | 17.5 |
| 2022-08-06 5:00 AM  | 17.7 | 17.7 | 17.7 | 17.7 |
| 2022-08-06 6:00 AM  | 17.9 | 18.0 | 18.0 | 17.9 |
| 2022-08-06 7:00 AM  | 17.8 | 17.9 | 17.9 | 17.8 |
| 2022-08-06 8:00 AM  | 17.9 | 18.0 | 18.0 | 17.9 |
| 2022-08-06 9:00 AM  | 18.4 | 18.5 | 18.5 | 18.4 |
| 2022-08-06 10:00 AM | 19.1 | 19.3 | 19.3 | 19.2 |
| 2022-08-06 11:00 AM | 19.5 | 19.9 | 19.9 | 19.7 |
| 2022-08-06 12:00 PM | 20.3 | 20.6 | 20.6 | 20.4 |
| 2022-08-06 1:00 PM  | 20.4 | 20.7 | 20.7 | 20.6 |
| 2022-08-06 2:00 PM  | 20.5 | 20.8 | 20.8 | 20.6 |
| 2022-08-06 3:00 PM  | 20.8 | 21.9 | 21.9 | 21.3 |
| 2022-08-06 4:00 PM  | 20.8 | 22.4 | 22.4 | 21.6 |
| 2022-08-06 5:00 PM  | 20.4 | 22.2 | 22.2 | 21.3 |
| 2022-08-06 6:00 PM  | 20.9 | 21.7 | 21.7 | 21.3 |
| 2022-08-06 7:00 PM  | 20.5 | 21.3 | 21.3 | 20.9 |
| 2022-08-06 8:00 PM  | 19.8 | 20.7 | 20.7 | 20.3 |
| 2022-08-06 9:00 PM  | 19.4 | 19.8 | 19.8 | 19.6 |
| 2022-08-06 10:00 PM | 18.9 | 19.0 | 19.0 | 18.9 |
| 2022-08-06 11:00 PM | 18.3 | 18.3 | 18.3 | 18.3 |
| 2022-08-07 12:00 AM | 17.6 | 17.3 | 17.3 | 17.4 |
| 2022-08-07 1:00 AM  | 17.1 | 16.7 | 16.7 | 16.9 |
| 2022-08-07 2:00 AM  | 16.8 | 16.3 | 16.3 | 16.5 |
| 2022-08-07 3:00 AM  | 16.6 | 16.0 | 16.0 | 16.3 |
| 2022-08-07 4:00 AM  | 16.3 | 15.7 | 15.7 | 16.0 |
| 2022-08-07 5:00 AM  | 16.2 | 15.4 | 15.4 | 15.8 |
| 2022-08-07 6:00 AM  | 15.9 | 15.0 | 15.0 | 15.4 |
| 2022-08-07 7:00 AM  | 15.7 | 14.8 | 14.8 | 15.3 |
| 2022-08-07 8:00 AM  | 15.5 | 14.6 | 14.6 | 15.1 |
| 2022-08-07 9:00 AM  | 15.6 | 14.7 | 14.7 | 15.2 |
| 2022-08-07 10:00 AM | 15.8 | 15.1 | 15.1 | 15.5 |
| 2022-08-07 11:00 AM | 16.4 | 15.9 | 15.9 | 16.1 |
| 2022-08-07 12:00 PM | 17.8 | 17.5 | 17.5 | 17.6 |

|                     |      |      |      |      |
|---------------------|------|------|------|------|
| 2022-08-07 1:00 PM  | 19.1 | 19.5 | 19.5 | 19.3 |
| 2022-08-07 2:00 PM  | 19.7 | 19.8 | 19.8 | 19.8 |
| 2022-08-07 3:00 PM  | 19.2 | 20.1 | 20.1 | 19.7 |
| 2022-08-07 4:00 PM  | 18.6 | 20.0 | 20.0 | 19.3 |
| 2022-08-07 5:00 PM  | 18.0 | 18.6 | 18.6 | 18.3 |
| 2022-08-07 6:00 PM  | 17.4 | 17.2 | 17.2 | 17.3 |
| 2022-08-07 7:00 PM  | 17.0 | 16.6 | 16.6 | 16.8 |
| 2022-08-07 8:00 PM  | 16.7 | 16.3 | 16.3 | 16.5 |
| 2022-08-07 9:00 PM  | 16.4 | 16.0 | 16.0 | 16.2 |
| 2022-08-07 10:00 PM | 16.1 | 15.6 | 15.6 | 15.9 |
| 2022-08-07 11:00 PM | 15.9 | 15.4 | 15.4 | 15.6 |
| 2022-08-08 12:00 AM | 15.8 | 15.3 | 15.3 | 15.6 |
| 2022-08-08 1:00 AM  | 15.6 | 15.1 | 15.1 | 15.4 |
| 2022-08-08 2:00 AM  | 15.4 | 14.9 | 14.9 | 15.1 |
| 2022-08-08 3:00 AM  | 15.1 | 14.7 | 14.7 | 14.9 |
| 2022-08-08 4:00 AM  | 15.1 | 14.6 | 14.6 | 14.9 |
| 2022-08-08 5:00 AM  | 15.0 | 14.5 | 14.5 | 14.8 |
| 2022-08-08 6:00 AM  | 15.0 | 14.5 | 14.5 | 14.8 |
| 2022-08-08 7:00 AM  | 14.9 | 14.6 | 14.6 | 14.8 |
| 2022-08-08 8:00 AM  | 14.9 | 14.4 | 14.4 | 14.6 |
| 2022-08-08 9:00 AM  | 15.0 | 14.6 | 14.6 | 14.8 |
| 2022-08-08 10:00 AM | 15.3 | 15.0 | 15.0 | 15.2 |
| 2022-08-08 11:00 AM | 15.9 | 15.7 | 15.7 | 15.8 |
| 2022-08-08 12:00 PM | 18.0 | 18.0 | 18.0 | 18.0 |
| 2022-08-08 1:00 PM  | 19.6 | 20.4 | 20.4 | 20.0 |
| 2022-08-08 2:00 PM  | 20.7 | 21.1 | 21.1 | 20.9 |
| 2022-08-08 3:00 PM  | 19.9 | 21.3 | 21.3 | 20.6 |
| 2022-08-08 4:00 PM  | 19.4 | 20.9 | 20.9 | 20.1 |
| 2022-08-08 5:00 PM  | 19.4 | 20.8 | 20.8 | 20.1 |
| 2022-08-08 6:00 PM  | 19.1 | 19.7 | 19.7 | 19.4 |
| 2022-08-08 7:00 PM  | 18.7 | 19.1 | 19.1 | 18.9 |
| 2022-08-08 8:00 PM  | 18.1 | 18.2 | 18.2 | 18.2 |
| 2022-08-08 9:00 PM  | 17.7 | 17.7 | 17.7 | 17.7 |
| 2022-08-08 10:00 PM | 17.3 | 17.1 | 17.1 | 17.2 |
| 2022-08-08 11:00 PM | 16.8 | 16.6 | 16.6 | 16.7 |
| 2022-08-09 12:00 AM | 16.3 | 15.9 | 15.9 | 16.1 |
| 2022-08-09 1:00 AM  | 16.0 | 15.6 | 15.6 | 15.8 |
| 2022-08-09 2:00 AM  | 15.7 | 15.2 | 15.2 | 15.4 |
| 2022-08-09 3:00 AM  | 15.4 | 14.9 | 14.9 | 15.1 |
| 2022-08-09 4:00 AM  | 15.2 | 14.5 | 14.5 | 14.8 |
| 2022-08-09 5:00 AM  | 15.0 | 14.3 | 14.3 | 14.7 |
| 2022-08-09 6:00 AM  | 14.8 | 14.1 | 14.1 | 14.5 |
| 2022-08-09 7:00 AM  | 14.3 | 14.0 | 14.0 | 14.2 |

|                     |      |      |      |      |
|---------------------|------|------|------|------|
| 2022-08-09 8:00 AM  | 14.3 | 13.6 | 13.6 | 14.0 |
| 2022-08-09 9:00 AM  | 14.8 | 14.3 | 14.3 | 14.6 |
| 2022-08-09 10:00 AM | 15.9 | 15.4 | 15.4 | 15.6 |
| 2022-08-09 11:00 AM | 16.5 | 16.2 | 16.2 | 16.4 |
| 2022-08-09 12:00 PM | 18.4 | 18.5 | 18.5 | 18.4 |
| 2022-08-09 1:00 PM  | 19.8 | 21.1 | 21.1 | 20.4 |
| 2022-08-09 2:00 PM  | 21.8 | 22.9 | 22.9 | 22.3 |
| 2022-08-09 3:00 PM  | 21.6 | 23.7 | 23.7 | 22.7 |
| 2022-08-09 4:00 PM  | 21.4 | 24.1 | 24.1 | 22.8 |
| 2022-08-09 5:00 PM  | 21.5 | 23.7 | 23.7 | 22.6 |
| 2022-08-09 6:00 PM  | 21.7 | 23.1 | 23.1 | 22.4 |
| 2022-08-09 7:00 PM  | 20.9 | 21.7 | 21.7 | 21.3 |
| 2022-08-09 8:00 PM  | 20.6 | 21.2 | 21.2 | 20.9 |
| 2022-08-09 9:00 PM  | 20.3 | 20.7 | 20.7 | 20.5 |
| 2022-08-09 10:00 PM | 19.8 | 20.1 | 20.1 | 19.9 |
| 2022-08-09 11:00 PM | 19.5 | 19.7 | 19.7 | 19.6 |
| 2022-08-10 12:00 AM | 19.1 | 19.3 | 19.3 | 19.2 |
| 2022-08-10 1:00 AM  | 18.7 | 18.8 | 18.8 | 18.8 |
| 2022-08-10 2:00 AM  | 18.3 | 18.3 | 18.3 | 18.3 |
| 2022-08-10 3:00 AM  | 17.7 | 17.5 | 17.5 | 17.6 |
| 2022-08-10 4:00 AM  | 17.0 | 16.6 | 16.6 | 16.8 |
| 2022-08-10 5:00 AM  | 16.6 | 16.0 | 16.0 | 16.3 |
| 2022-08-10 6:00 AM  | 16.6 | 16.3 | 16.3 | 16.4 |
| 2022-08-10 7:00 AM  | 16.3 | 15.9 | 15.9 | 16.1 |
| 2022-08-10 8:00 AM  | 16.1 | 15.8 | 15.8 | 16.0 |
| 2022-08-10 9:00 AM  | 16.3 | 16.0 | 16.0 | 16.1 |
| 2022-08-10 10:00 AM | 16.8 | 16.7 | 16.7 | 16.8 |
| 2022-08-10 11:00 AM | 17.3 | 17.4 | 17.4 | 17.3 |
| 2022-08-10 12:00 PM | 18.5 | 19.0 | 19.0 | 18.8 |
| 2022-08-10 1:00 PM  | 19.1 | 20.0 | 20.0 | 19.6 |
| 2022-08-10 2:00 PM  | 19.4 | 20.9 | 20.9 | 20.1 |
| 2022-08-10 3:00 PM  | 20.0 | 21.2 | 21.2 | 20.6 |
| 2022-08-10 4:00 PM  | 19.5 | 20.5 | 20.5 | 20.0 |
| 2022-08-10 5:00 PM  | 19.9 | 21.0 | 21.0 | 20.4 |
| 2022-08-10 6:00 PM  | 19.8 | 20.4 | 20.4 | 20.1 |
| 2022-08-10 7:00 PM  | 18.8 | 19.1 | 19.1 | 18.9 |
| 2022-08-10 8:00 PM  | 18.5 | 18.7 | 18.7 | 18.6 |
| 2022-08-10 9:00 PM  | 18.1 | 18.3 | 18.3 | 18.2 |
| 2022-08-10 10:00 PM | 17.5 | 17.6 | 17.6 | 17.6 |
| 2022-08-10 11:00 PM | 17.1 | 16.9 | 16.9 | 17.0 |
| 2022-08-11 12:00 AM | 16.6 | 16.3 | 16.3 | 16.4 |
| 2022-08-11 1:00 AM  | 16.2 | 15.9 | 15.9 | 16.1 |
| 2022-08-11 2:00 AM  | 15.8 | 15.3 | 15.3 | 15.6 |

|                     |      |      |      |      |
|---------------------|------|------|------|------|
| 2022-08-11 3:00 AM  | 15.4 | 14.8 | 14.8 | 15.1 |
| 2022-08-11 4:00 AM  | 15.0 | 14.2 | 14.2 | 14.6 |
| 2022-08-11 5:00 AM  | 14.6 | 13.6 | 13.6 | 14.1 |
| 2022-08-11 6:00 AM  | 14.3 | 13.1 | 13.1 | 13.7 |
| 2022-08-11 7:00 AM  | 13.8 | 12.7 | 12.7 | 13.3 |
| 2022-08-11 8:00 AM  | 13.4 | 12.6 | 12.6 | 13.0 |
| 2022-08-11 9:00 AM  | 13.8 | 13.1 | 13.1 | 13.5 |
| 2022-08-11 10:00 AM | 14.7 | 14.2 | 14.2 | 14.4 |
| 2022-08-11 11:00 AM | 15.6 | 15.4 | 15.4 | 15.5 |
| 2022-08-11 12:00 PM | 17.6 | 17.7 | 17.7 | 17.7 |
| 2022-08-11 1:00 PM  | 19.3 | 20.5 | 20.5 | 19.9 |
| 2022-08-11 2:00 PM  | 20.7 | 21.6 | 21.6 | 21.2 |
| 2022-08-11 3:00 PM  | 20.1 | 21.9 | 21.9 | 21.0 |
| 2022-08-11 4:00 PM  | 20.2 | 22.6 | 22.6 | 21.4 |
| 2022-08-11 5:00 PM  | 20.0 | 21.7 | 21.7 | 20.9 |
| 2022-08-11 6:00 PM  | 19.9 | 20.6 | 20.6 | 20.3 |
| 2022-08-11 7:00 PM  | 18.6 | 18.9 | 18.9 | 18.8 |
| 2022-08-11 8:00 PM  | 18.0 | 18.1 | 18.1 | 18.1 |
| 2022-08-11 9:00 PM  | 17.5 | 17.4 | 17.4 | 17.4 |
| 2022-08-11 10:00 PM | 16.9 | 16.6 | 16.6 | 16.8 |
| 2022-08-11 11:00 PM | 16.4 | 16.1 | 16.1 | 16.3 |
| 2022-08-12 12:00 AM | 15.9 | 15.6 | 15.6 | 15.8 |
| 2022-08-12 1:00 AM  | 15.4 | 14.7 | 14.7 | 15.0 |
| 2022-08-12 2:00 AM  | 15.0 | 14.1 | 14.1 | 14.6 |
| 2022-08-12 3:00 AM  | 14.6 | 13.6 | 13.6 | 14.1 |
| 2022-08-12 4:00 AM  | 14.2 | 13.1 | 13.1 | 13.7 |
| 2022-08-12 5:00 AM  | 13.8 | 12.7 | 12.7 | 13.3 |
| 2022-08-12 6:00 AM  | 13.4 | 12.4 | 12.4 | 12.9 |
| 2022-08-12 7:00 AM  | 13.1 | 12.1 | 12.1 | 12.6 |
| 2022-08-12 8:00 AM  | 12.9 | 11.9 | 11.9 | 12.4 |
| 2022-08-12 9:00 AM  | 12.8 | 12.1 | 12.1 | 12.5 |
| 2022-08-12 10:00 AM | 14.2 | 13.6 | 13.6 | 13.9 |
| 2022-08-12 11:00 AM | 15.3 | 15.1 | 15.1 | 15.2 |
| 2022-08-12 12:00 PM | 16.6 | 16.5 | 16.5 | 16.6 |
| 2022-08-12 1:00 PM  | 17.4 | 18.3 | 18.3 | 17.8 |
| 2022-08-12 2:00 PM  | 18.4 | 19.5 | 19.5 | 18.9 |
| 2022-08-12 3:00 PM  | 17.7 | 19.4 | 19.4 | 18.6 |
| 2022-08-12 4:00 PM  | 17.7 | 20.0 | 20.0 | 18.9 |
| 2022-08-12 5:00 PM  | 17.9 | 19.8 | 19.8 | 18.8 |
| 2022-08-12 6:00 PM  | 17.9 | 18.9 | 18.9 | 18.4 |
| 2022-08-12 7:00 PM  | 17.2 | 17.5 | 17.5 | 17.4 |
| 2022-08-12 8:00 PM  | 16.6 | 16.7 | 16.7 | 16.7 |
| 2022-08-12 9:00 PM  | 16.3 | 16.3 | 16.3 | 16.3 |

|                     |      |      |      |      |
|---------------------|------|------|------|------|
| 2022-08-12 10:00 PM | 16.0 | 15.9 | 15.9 | 15.9 |
| 2022-08-12 11:00 PM | 15.7 | 15.4 | 15.4 | 15.5 |
| 2022-08-13 12:00 AM | 15.4 | 15.1 | 15.1 | 15.3 |
| 2022-08-13 1:00 AM  | 15.2 | 14.8 | 14.8 | 15.0 |
| 2022-08-13 2:00 AM  | 14.9 | 14.4 | 14.4 | 14.6 |
| 2022-08-13 3:00 AM  | 14.8 | 14.4 | 14.4 | 14.6 |
| 2022-08-13 4:00 AM  | 15.0 | 14.6 | 14.6 | 14.8 |
| 2022-08-13 5:00 AM  | 15.1 | 14.8 | 14.8 | 15.0 |
| 2022-08-13 6:00 AM  | 15.2 | 15.0 | 15.0 | 15.1 |
| 2022-08-13 7:00 AM  | 15.3 | 15.1 | 15.1 | 15.2 |
| 2022-08-13 8:00 AM  | 15.3 | 15.2 | 15.2 | 15.3 |
| 2022-08-13 9:00 AM  | 15.5 | 15.4 | 15.4 | 15.4 |
| 2022-08-13 10:00 AM | 15.9 | 15.9 | 15.9 | 15.9 |
| 2022-08-13 11:00 AM | 16.1 | 16.1 | 16.1 | 16.1 |
| 2022-08-13 12:00 PM | 17.0 | 17.4 | 17.4 | 17.2 |
| 2022-08-13 1:00 PM  | 18.9 | 20.3 | 20.3 | 19.6 |
| 2022-08-13 2:00 PM  | 20.2 | 21.5 | 21.5 | 20.9 |
| 2022-08-13 3:00 PM  | 19.9 | 22.0 | 22.0 | 20.9 |
| 2022-08-13 4:00 PM  | 19.4 | 21.8 | 21.8 | 20.6 |
| 2022-08-13 5:00 PM  | 19.3 | 21.2 | 21.2 | 20.3 |
| 2022-08-13 6:00 PM  | 19.1 | 20.0 | 20.0 | 19.6 |
| 2022-08-13 7:00 PM  | 17.9 | 18.1 | 18.1 | 18.0 |
| 2022-08-13 8:00 PM  | 17.2 | 17.2 | 17.2 | 17.2 |
| 2022-08-13 9:00 PM  | 16.7 | 16.6 | 16.6 | 16.7 |
| 2022-08-13 10:00 PM | 16.5 | 16.4 | 16.4 | 16.4 |
| 2022-08-13 11:00 PM | 16.5 | 16.3 | 16.3 | 16.4 |
| 2022-08-14 12:00 AM | 16.3 | 16.1 | 16.1 | 16.2 |
| 2022-08-14 1:00 AM  | 16.2 | 16.0 | 16.0 | 16.1 |
| 2022-08-14 2:00 AM  | 16.2 | 16.0 | 16.0 | 16.1 |
| 2022-08-14 3:00 AM  | 16.1 | 16.0 | 16.0 | 16.1 |
| 2022-08-14 4:00 AM  | 16.1 | 16.0 | 16.0 | 16.1 |
| 2022-08-14 5:00 AM  | 16.1 | 16.1 | 16.1 | 16.1 |
| 2022-08-14 6:00 AM  | 16.0 | 16.0 | 16.0 | 16.0 |
| 2022-08-14 7:00 AM  | 16.0 | 16.0 | 16.0 | 16.0 |
| 2022-08-14 8:00 AM  | 16.1 | 16.0 | 16.0 | 16.1 |
| 2022-08-14 9:00 AM  | 16.1 | 16.1 | 16.1 | 16.1 |
| 2022-08-14 10:00 AM | 16.2 | 16.1 | 16.1 | 16.2 |
| 2022-08-14 11:00 AM | 16.4 | 16.4 | 16.4 | 16.4 |
| 2022-08-14 12:00 PM | 16.5 | 16.5 | 16.5 | 16.5 |
| 2022-08-14 1:00 PM  | 17.0 | 17.0 | 17.0 | 17.0 |
| 2022-08-14 2:00 PM  | 18.1 | 18.2 | 18.2 | 18.2 |
| 2022-08-14 3:00 PM  | 18.6 | 19.0 | 19.0 | 18.8 |
| 2022-08-14 4:00 PM  | 18.4 | 18.6 | 18.6 | 18.5 |

|                     |      |      |      |      |
|---------------------|------|------|------|------|
| 2022-08-14 5:00 PM  | 18.3 | 19.1 | 19.1 | 18.7 |
| 2022-08-14 6:00 PM  | 18.2 | 19.0 | 19.0 | 18.6 |
| 2022-08-14 7:00 PM  | 17.5 | 17.7 | 17.7 | 17.6 |
| 2022-08-14 8:00 PM  | 17.2 | 17.3 | 17.3 | 17.3 |
| 2022-08-14 9:00 PM  | 16.8 | 16.7 | 16.7 | 16.8 |
| 2022-08-14 10:00 PM | 16.2 | 16.1 | 16.1 | 16.2 |
| 2022-08-14 11:00 PM | 16.0 | 15.8 | 15.8 | 15.9 |
| 2022-08-15 12:00 AM | 15.9 | 15.7 | 15.7 | 15.8 |
| 2022-08-15 1:00 AM  | 16.0 | 15.9 | 15.9 | 15.9 |
| 2022-08-15 2:00 AM  | 16.1 | 16.0 | 16.0 | 16.1 |
| 2022-08-15 3:00 AM  | 16.0 | 15.9 | 15.9 | 15.9 |
| 2022-08-15 4:00 AM  | 16.1 | 16.0 | 16.0 | 16.1 |
| 2022-08-15 5:00 AM  | 16.1 | 16.0 | 16.0 | 16.1 |
| 2022-08-15 6:00 AM  | 16.0 | 15.9 | 15.9 | 15.9 |
| 2022-08-15 7:00 AM  | 16.0 | 15.9 | 15.9 | 15.9 |
| 2022-08-15 8:00 AM  | 16.0 | 16.0 | 16.0 | 16.0 |
| 2022-08-15 9:00 AM  | 16.2 | 16.1 | 16.1 | 16.2 |
| 2022-08-15 10:00 AM | 16.6 | 16.6 | 16.6 | 16.6 |
| 2022-08-15 11:00 AM | 17.2 | 17.3 | 17.3 | 17.3 |
| 2022-08-15 12:00 PM | 18.5 | 18.4 | 18.4 | 18.4 |
| 2022-08-15 1:00 PM  | 19.8 | 20.4 | 20.4 | 20.1 |
| 2022-08-15 2:00 PM  | 20.5 | 21.1 | 21.1 | 20.8 |
| 2022-08-15 3:00 PM  | 20.1 | 21.6 | 21.6 | 20.9 |
| 2022-08-15 4:00 PM  | 19.9 | 21.8 | 21.8 | 20.8 |
| 2022-08-15 5:00 PM  | 19.9 | 21.3 | 21.3 | 20.6 |
| 2022-08-15 6:00 PM  | 19.9 | 20.4 | 20.4 | 20.1 |
| 2022-08-15 7:00 PM  | 18.6 | 18.8 | 18.8 | 18.7 |
| 2022-08-15 8:00 PM  | 18.0 | 18.1 | 18.1 | 18.1 |
| 2022-08-15 9:00 PM  | 17.5 | 17.6 | 17.6 | 17.6 |
| 2022-08-15 10:00 PM | 17.0 | 17.1 | 17.1 | 17.1 |
| 2022-08-15 11:00 PM | 16.4 | 16.5 | 16.5 | 16.4 |
| 2022-08-16 12:00 AM | 16.1 | 16.2 | 16.2 | 16.2 |
| 2022-08-16 1:00 AM  | 15.9 | 15.7 | 15.7 | 15.8 |
| 2022-08-16 2:00 AM  | 15.5 | 15.2 | 15.2 | 15.3 |
| 2022-08-16 3:00 AM  | 15.2 | 14.5 | 14.5 | 14.8 |
| 2022-08-16 4:00 AM  | 14.9 | 14.2 | 14.2 | 14.5 |
| 2022-08-16 5:00 AM  | 14.4 | 14.2 | 14.2 | 14.3 |
| 2022-08-16 6:00 AM  | 14.3 | 13.9 | 13.9 | 14.1 |
| 2022-08-16 7:00 AM  | 14.0 | 13.7 | 13.7 | 13.8 |
| 2022-08-16 8:00 AM  | 14.0 | 13.6 | 13.6 | 13.8 |
| 2022-08-16 9:00 AM  | 14.6 | 14.3 | 14.3 | 14.5 |
| 2022-08-16 10:00 AM | 15.5 | 15.2 | 15.2 | 15.3 |
| 2022-08-16 11:00 AM | 16.5 | 16.1 | 16.1 | 16.3 |

|                     |      |      |      |      |
|---------------------|------|------|------|------|
| 2022-08-16 12:00 PM | 18.9 | 17.8 | 17.8 | 18.3 |
| 2022-08-16 1:00 PM  | 21.0 | 19.9 | 19.9 | 20.4 |
| 2022-08-16 2:00 PM  | 22.1 | 20.7 | 20.7 | 21.4 |
| 2022-08-16 3:00 PM  | 21.2 | 21.6 | 21.6 | 21.4 |
| 2022-08-16 4:00 PM  | 20.4 | 21.9 | 21.9 | 21.1 |
| 2022-08-16 5:00 PM  | 20.0 | 20.9 | 20.9 | 20.4 |
| 2022-08-16 6:00 PM  | 19.8 | 20.0 | 20.0 | 19.9 |
| 2022-08-16 7:00 PM  | 18.8 | 18.8 | 18.8 | 18.8 |
| 2022-08-16 8:00 PM  | 18.0 | 18.1 | 18.1 | 18.1 |
| 2022-08-16 9:00 PM  | 17.8 | 17.8 | 17.8 | 17.8 |
| 2022-08-16 10:00 PM | 17.5 | 17.4 | 17.4 | 17.4 |
| 2022-08-16 11:00 PM | 17.0 | 17.0 | 17.0 | 17.0 |
| 2022-08-17 12:00 AM | 16.7 | 16.7 | 16.7 | 16.7 |
| 2022-08-17 1:00 AM  | 16.9 | 16.8 | 16.8 | 16.8 |
| 2022-08-17 2:00 AM  | 17.0 | 16.9 | 16.9 | 16.9 |
| 2022-08-17 3:00 AM  | 17.1 | 17.0 | 17.0 | 17.1 |
| 2022-08-17 4:00 AM  | 17.0 | 16.9 | 16.9 | 16.9 |
| 2022-08-17 5:00 AM  | 16.7 | 16.7 | 16.7 | 16.7 |
| 2022-08-17 6:00 AM  | 16.5 | 16.5 | 16.5 | 16.5 |
| 2022-08-17 7:00 AM  | 16.4 | 16.3 | 16.3 | 16.3 |
| 2022-08-17 8:00 AM  | 16.5 | 16.3 | 16.3 | 16.4 |
| 2022-08-17 9:00 AM  | 16.9 | 16.7 | 16.7 | 16.8 |
| 2022-08-17 10:00 AM | 17.2 | 17.1 | 17.1 | 17.2 |
| 2022-08-17 11:00 AM | 17.8 | 17.6 | 17.6 | 17.7 |
| 2022-08-17 12:00 PM | 19.1 | 18.5 | 18.5 | 18.8 |
| 2022-08-17 1:00 PM  | 19.9 | 19.4 | 19.4 | 19.6 |
| 2022-08-17 2:00 PM  | 20.5 | 20.4 | 20.4 | 20.4 |
| 2022-08-17 3:00 PM  | 20.6 | 20.7 | 20.7 | 20.7 |
| 2022-08-17 4:00 PM  | 20.7 | 21.5 | 21.5 | 21.1 |
| 2022-08-17 5:00 PM  | 20.0 | 20.3 | 20.3 | 20.1 |
| 2022-08-17 6:00 PM  | 19.2 | 19.3 | 19.3 | 19.3 |
| 2022-08-17 7:00 PM  | 19.0 | 19.2 | 19.2 | 19.1 |
| 2022-08-17 8:00 PM  | 18.5 | 18.5 | 18.5 | 18.5 |
| 2022-08-17 9:00 PM  | 18.1 | 18.1 | 18.1 | 18.1 |
| 2022-08-17 10:00 PM | 17.7 | 17.6 | 17.6 | 17.7 |
| 2022-08-17 11:00 PM | 17.3 | 17.4 | 17.4 | 17.3 |
| 2022-08-18 12:00 AM | 17.0 | 17.1 | 17.1 | 17.1 |
| 2022-08-18 1:00 AM  | 17.1 | 17.0 | 17.0 | 17.1 |
| 2022-08-18 2:00 AM  | 17.2 | 17.2 | 17.2 | 17.2 |
| 2022-08-18 3:00 AM  | 17.0 | 17.1 | 17.1 | 17.1 |
| 2022-08-18 4:00 AM  | 16.8 | 16.9 | 16.9 | 16.8 |
| 2022-08-18 5:00 AM  | 16.6 | 16.7 | 16.7 | 16.7 |
| 2022-08-18 6:00 AM  | 16.2 | 16.4 | 16.4 | 16.3 |

|                     |      |      |      |      |
|---------------------|------|------|------|------|
| 2022-08-18 7:00 AM  | 16.1 | 16.3 | 16.3 | 16.2 |
| 2022-08-18 8:00 AM  | 16.2 | 16.3 | 16.3 | 16.3 |
| 2022-08-18 9:00 AM  | 16.6 | 16.6 | 16.6 | 16.6 |
| 2022-08-18 10:00 AM | 17.4 | 17.4 | 17.4 | 17.4 |
| 2022-08-18 11:00 AM | 18.4 | 18.3 | 18.3 | 18.3 |
| 2022-08-18 12:00 PM | 21.0 | 20.3 | 20.3 | 20.6 |
| 2022-08-18 1:00 PM  | 23.7 | 22.6 | 22.6 | 23.2 |
| 2022-08-18 2:00 PM  | 22.6 | 22.2 | 22.2 | 22.4 |
| 2022-08-18 3:00 PM  | 20.7 | 20.8 | 20.8 | 20.8 |
| 2022-08-18 4:00 PM  | 19.7 | 19.7 | 19.7 | 19.7 |
| 2022-08-18 5:00 PM  | 19.6 | 19.6 | 19.6 | 19.6 |
| 2022-08-18 6:00 PM  | 19.1 | 19.2 | 19.2 | 19.2 |
| 2022-08-18 7:00 PM  | 19.0 | 19.1 | 19.1 | 19.1 |
| 2022-08-18 8:00 PM  | 19.0 | 19.1 | 19.1 | 19.1 |
| 2022-08-18 9:00 PM  | 18.4 | 18.6 | 18.6 | 18.5 |
| 2022-08-18 10:00 PM | 17.9 | 18.1 | 18.1 | 18.0 |
| 2022-08-18 11:00 PM | 17.6 | 17.9 | 17.9 | 17.8 |
| 2022-08-19 12:00 AM | 17.4 | 17.6 | 17.6 | 17.5 |
| 2022-08-19 1:00 AM  | 17.5 | 17.5 | 17.5 | 17.5 |
| 2022-08-19 2:00 AM  | 17.6 | 17.7 | 17.7 | 17.7 |
| 2022-08-19 3:00 AM  | 17.6 | 17.6 | 17.6 | 17.6 |
| 2022-08-19 4:00 AM  | 17.6 | 17.7 | 17.7 | 17.7 |
| 2022-08-19 5:00 AM  | 17.6 | 17.7 | 17.7 | 17.7 |
| 2022-08-19 6:00 AM  | 17.6 | 17.6 | 17.6 | 17.6 |
| 2022-08-19 7:00 AM  | 17.5 | 17.5 | 17.5 | 17.5 |
| 2022-08-19 8:00 AM  | 17.4 | 17.4 | 17.4 | 17.4 |
| 2022-08-19 9:00 AM  | 17.6 | 17.5 | 17.5 | 17.6 |
| 2022-08-19 10:00 AM | 17.8 | 17.7 | 17.7 | 17.8 |
| 2022-08-19 11:00 AM | 18.3 | 18.1 | 18.1 | 18.2 |
| 2022-08-19 12:00 PM | 19.0 | 18.7 | 18.7 | 18.9 |
| 2022-08-19 1:00 PM  | 20.3 | 19.7 | 19.7 | 20.0 |
| 2022-08-19 2:00 PM  | 22.4 | 21.3 | 21.3 | 21.8 |
| 2022-08-19 3:00 PM  | 21.7 | 22.2 | 22.2 | 22.0 |
| 2022-08-19 4:00 PM  | 21.5 | 22.6 | 22.6 | 22.1 |
| 2022-08-19 5:00 PM  | 21.6 | 22.4 | 22.4 | 22.0 |
| 2022-08-19 6:00 PM  | 20.8 | 21.0 | 21.0 | 20.9 |
| 2022-08-19 7:00 PM  | 20.2 | 20.2 | 20.2 | 20.2 |
| 2022-08-19 8:00 PM  | 20.0 | 20.0 | 20.0 | 20.0 |
| 2022-08-19 9:00 PM  | 19.5 | 19.6 | 19.6 | 19.6 |
| 2022-08-19 10:00 PM | 19.0 | 19.2 | 19.2 | 19.1 |
| 2022-08-19 11:00 PM | 18.6 | 18.7 | 18.7 | 18.7 |
| 2022-08-20 12:00 AM | 18.3 | 18.4 | 18.4 | 18.3 |
| 2022-08-20 1:00 AM  | 18.0 | 18.0 | 18.0 | 18.0 |



|                     |      |      |      |      |
|---------------------|------|------|------|------|
| 2022-08-20 2:00 AM  | 18.0 | 18.0 | 18.0 | 18.0 |
| 2022-08-20 3:00 AM  | 18.0 | 18.0 | 18.0 | 18.0 |
| 2022-08-20 4:00 AM  | 17.8 | 17.7 | 17.7 | 17.8 |
| 2022-08-20 5:00 AM  | 17.8 | 17.6 | 17.6 | 17.7 |
| 2022-08-20 6:00 AM  | 17.6 | 17.5 | 17.5 | 17.6 |
| 2022-08-20 7:00 AM  | 17.2 | 17.2 | 17.2 | 17.2 |
| 2022-08-20 8:00 AM  | 16.9 | 16.9 | 16.9 | 16.9 |
| 2022-08-20 9:00 AM  | 17.2 | 16.9 | 16.9 | 17.1 |
| 2022-08-20 10:00 AM | 17.4 | 17.1 | 17.1 | 17.3 |
| 2022-08-20 11:00 AM | 18.1 | 17.7 | 17.7 | 17.9 |
| 2022-08-20 12:00 PM | 20.1 | 19.1 | 19.1 | 19.6 |
| 2022-08-20 1:00 PM  | 19.8 | 19.2 | 19.2 | 19.5 |
| 2022-08-20 2:00 PM  | 21.4 | 20.4 | 20.4 | 20.9 |
| 2022-08-20 3:00 PM  | 21.2 | 21.5 | 21.5 | 21.4 |
| 2022-08-20 4:00 PM  | 20.6 | 22.0 | 22.0 | 21.3 |
| 2022-08-20 5:00 PM  | 20.6 | 21.5 | 21.5 | 21.1 |
| 2022-08-20 6:00 PM  | 20.5 | 20.6 | 20.6 | 20.6 |
| 2022-08-20 7:00 PM  | 19.6 | 19.5 | 19.5 | 19.6 |
| 2022-08-20 8:00 PM  | 18.7 | 18.6 | 18.6 | 18.7 |
| 2022-08-20 9:00 PM  | 18.2 | 18.1 | 18.1 | 18.2 |
| 2022-08-20 10:00 PM | 17.6 | 17.6 | 17.6 | 17.6 |
| 2022-08-20 11:00 PM | 17.1 | 17.1 | 17.1 | 17.1 |
| 2022-08-21 12:00 AM | 16.6 | 16.2 | 16.2 | 16.4 |
| 2022-08-21 1:00 AM  | 16.1 | 15.6 | 15.6 | 15.9 |
| 2022-08-21 2:00 AM  | 15.5 | 15.4 | 15.4 | 15.4 |
| 2022-08-21 3:00 AM  | 15.1 | 14.9 | 14.9 | 15.0 |
| 2022-08-21 4:00 AM  | 14.6 | 14.5 | 14.5 | 14.6 |
| 2022-08-21 5:00 AM  | 14.2 | 14.3 | 14.3 | 14.3 |
| 2022-08-21 6:00 AM  | 14.0 | 14.0 | 14.0 | 14.0 |
| 2022-08-21 7:00 AM  | 13.7 | 13.8 | 13.8 | 13.8 |
| 2022-08-21 8:00 AM  | 13.6 | 13.6 | 13.6 | 13.6 |
| 2022-08-21 9:00 AM  | 14.1 | 14.0 | 14.0 | 14.1 |
| 2022-08-21 10:00 AM | 15.2 | 15.0 | 15.0 | 15.1 |
| 2022-08-21 11:00 AM | 16.5 | 16.0 | 16.0 | 16.3 |
| 2022-08-21 12:00 PM | 19.6 | 18.2 | 18.2 | 18.9 |
| 2022-08-21 1:00 PM  | 21.7 | 19.9 | 19.9 | 20.8 |
| 2022-08-21 2:00 PM  | 22.6 | 21.2 | 21.2 | 21.9 |
| 2022-08-21 3:00 PM  | 21.3 | 21.8 | 21.8 | 21.5 |
| 2022-08-21 4:00 PM  | 20.6 | 22.0 | 22.0 | 21.3 |
| 2022-08-21 5:00 PM  | 20.4 | 21.4 | 21.4 | 20.9 |
| 2022-08-21 6:00 PM  | 20.2 | 20.6 | 20.6 | 20.4 |
| 2022-08-21 7:00 PM  | 19.2 | 19.4 | 19.4 | 19.3 |
| 2022-08-21 8:00 PM  | 18.7 | 18.7 | 18.7 | 18.7 |

|                     |      |      |      |      |
|---------------------|------|------|------|------|
| 2022-08-21 9:00 PM  | 18.1 | 18.1 | 18.1 | 18.1 |
| 2022-08-21 10:00 PM | 17.6 | 17.6 | 17.6 | 17.6 |
| 2022-08-21 11:00 PM | 17.3 | 17.4 | 17.4 | 17.3 |
| 2022-08-22 12:00 AM | 16.9 | 17.1 | 17.1 | 17.0 |
| 2022-08-22 1:00 AM  | 16.6 | 16.6 | 16.6 | 16.6 |
| 2022-08-22 2:00 AM  | 16.3 | 16.1 | 16.1 | 16.2 |
| 2022-08-22 3:00 AM  | 16.0 | 15.8 | 15.8 | 15.9 |
| 2022-08-22 4:00 AM  | 15.6 | 15.7 | 15.7 | 15.7 |
| 2022-08-22 5:00 AM  | 15.2 | 15.3 | 15.3 | 15.3 |
| 2022-08-22 6:00 AM  | 15.1 | 15.2 | 15.2 | 15.2 |
| 2022-08-22 7:00 AM  | 14.8 | 15.0 | 15.0 | 14.9 |
| 2022-08-22 8:00 AM  | 14.7 | 14.8 | 14.8 | 14.8 |
| 2022-08-22 9:00 AM  | 15.1 | 15.1 | 15.1 | 15.1 |
| 2022-08-22 10:00 AM | 16.5 | 16.3 | 16.3 | 16.4 |
| 2022-08-22 11:00 AM | 17.8 | 17.5 | 17.5 | 17.6 |
| 2022-08-22 12:00 PM | 19.8 | 19.0 | 19.0 | 19.4 |
| 2022-08-22 1:00 PM  | 22.1 | 20.6 | 20.6 | 21.4 |
| 2022-08-22 2:00 PM  | 21.0 | 20.6 | 20.6 | 20.8 |
| 2022-08-22 3:00 PM  | 21.0 | 21.7 | 21.7 | 21.4 |
| 2022-08-22 4:00 PM  | 20.0 | 20.3 | 20.3 | 20.1 |
| 2022-08-22 5:00 PM  | 18.9 | 18.9 | 18.9 | 18.9 |
| 2022-08-22 6:00 PM  | 19.1 | 19.1 | 19.1 | 19.1 |
| 2022-08-22 7:00 PM  | 19.3 | 19.3 | 19.3 | 19.3 |
| 2022-08-22 8:00 PM  | 19.0 | 19.2 | 19.2 | 19.1 |
| 2022-08-22 9:00 PM  | 18.6 | 18.7 | 18.7 | 18.7 |
| 2022-08-22 10:00 PM | 18.2 | 18.2 | 18.2 | 18.2 |
| 2022-08-22 11:00 PM | 18.3 | 18.2 | 18.2 | 18.3 |
| 2022-08-23 12:00 AM | 18.2 | 18.2 | 18.2 | 18.2 |
| 2022-08-23 1:00 AM  | 18.0 | 18.1 | 18.1 | 18.1 |
| 2022-08-23 2:00 AM  | 18.0 | 18.0 | 18.0 | 18.0 |
| 2022-08-23 3:00 AM  | 18.0 | 18.0 | 18.0 | 18.0 |
| 2022-08-23 4:00 AM  | 18.0 | 18.0 | 18.0 | 18.0 |
| 2022-08-23 5:00 AM  | 17.9 | 17.9 | 17.9 | 17.9 |
| 2022-08-23 6:00 AM  | 17.7 | 17.7 | 17.7 | 17.7 |
| 2022-08-23 7:00 AM  | 17.5 | 17.5 | 17.5 | 17.5 |
| 2022-08-23 8:00 AM  | 17.4 | 17.4 | 17.4 | 17.4 |
| 2022-08-23 9:00 AM  | 17.7 | 17.6 | 17.6 | 17.7 |
| 2022-08-23 10:00 AM | 18.0 | 17.9 | 17.9 | 17.9 |
| 2022-08-23 11:00 AM | 18.7 | 18.5 | 18.5 | 18.6 |
| 2022-08-23 12:00 PM | 19.2 | 19.0 | 19.0 | 19.1 |
| 2022-08-23 1:00 PM  | 20.7 | 19.9 | 19.9 | 20.3 |
| 2022-08-23 2:00 PM  | 22.0 | 21.2 | 21.2 | 21.6 |
| 2022-08-23 3:00 PM  | 21.3 | 21.3 | 21.3 | 21.3 |

|                     |      |      |      |      |
|---------------------|------|------|------|------|
| 2022-08-23 4:00 PM  | 20.9 | 21.5 | 21.5 | 21.2 |
| 2022-08-23 5:00 PM  | 21.3 | 22.2 | 22.2 | 21.8 |
| 2022-08-23 6:00 PM  | 21.2 | 21.9 | 21.9 | 21.6 |
| 2022-08-23 7:00 PM  | 20.2 | 20.5 | 20.5 | 20.4 |
| 2022-08-23 8:00 PM  | 19.4 | 19.6 | 19.6 | 19.5 |
| 2022-08-23 9:00 PM  | 18.6 | 18.8 | 18.8 | 18.7 |
| 2022-08-23 10:00 PM | 18.3 | 18.4 | 18.4 | 18.3 |
| 2022-08-23 11:00 PM | 17.8 | 18.0 | 18.0 | 17.9 |
| 2022-08-24 12:00 AM | 17.5 | 17.6 | 17.6 | 17.6 |
| 2022-08-24 1:00 AM  | 17.2 | 17.3 | 17.3 | 17.3 |
| 2022-08-24 2:00 AM  | 16.9 | 16.8 | 16.8 | 16.8 |
| 2022-08-24 3:00 AM  | 16.4 | 16.5 | 16.5 | 16.4 |
| 2022-08-24 4:00 AM  | 16.0 | 16.0 | 16.0 | 16.0 |
| 2022-08-24 5:00 AM  | 16.0 | 16.0 | 16.0 | 16.0 |
| 2022-08-24 6:00 AM  | 16.1 | 16.0 | 16.0 | 16.1 |
| 2022-08-24 7:00 AM  | 16.2 | 16.0 | 16.0 | 16.1 |
| 2022-08-24 8:00 AM  | 16.2 | 16.1 | 16.1 | 16.2 |
| 2022-08-24 9:00 AM  | 16.4 | 16.2 | 16.2 | 16.3 |
| 2022-08-24 10:00 AM | 16.6 | 16.3 | 16.3 | 16.4 |
| 2022-08-24 11:00 AM | 16.9 | 16.7 | 16.7 | 16.8 |
| 2022-08-24 12:00 PM | 17.2 | 17.0 | 17.0 | 17.1 |
| 2022-08-24 1:00 PM  | 17.2 | 17.0 | 17.0 | 17.1 |
| 2022-08-24 2:00 PM  | 17.3 | 17.1 | 17.1 | 17.2 |
| 2022-08-24 3:00 PM  | 17.3 | 16.9 | 16.9 | 17.1 |
| 2022-08-24 4:00 PM  | 17.3 | 16.9 | 16.9 | 17.1 |
| 2022-08-24 5:00 PM  | 17.5 | 17.0 | 17.0 | 17.3 |
| 2022-08-24 6:00 PM  | 17.6 | 17.3 | 17.3 | 17.4 |
| 2022-08-24 7:00 PM  | 17.6 | 17.4 | 17.4 | 17.5 |
| 2022-08-24 8:00 PM  | 17.5 | 17.3 | 17.3 | 17.4 |
| 2022-08-24 9:00 PM  | 17.2 | 17.2 | 17.2 | 17.2 |
| 2022-08-24 10:00 PM | 17.1 | 17.0 | 17.0 | 17.1 |
| 2022-08-24 11:00 PM | 17.0 | 16.8 | 16.8 | 16.9 |
| 2022-08-25 12:00 AM | 16.6 | 16.5 | 16.5 | 16.6 |
| 2022-08-25 1:00 AM  | 16.3 | 16.1 | 16.1 | 16.2 |
| 2022-08-25 2:00 AM  | 16.0 | 15.6 | 15.6 | 15.8 |
| 2022-08-25 3:00 AM  | 15.9 | 15.4 | 15.4 | 15.6 |
| 2022-08-25 4:00 AM  | 15.9 | 15.4 | 15.4 | 15.6 |
| 2022-08-25 5:00 AM  | 15.8 | 15.3 | 15.3 | 15.6 |
| 2022-08-25 6:00 AM  | 15.4 | 14.8 | 14.8 | 15.1 |
| 2022-08-25 7:00 AM  | 15.5 | 14.9 | 14.9 | 15.2 |
| 2022-08-25 8:00 AM  | 15.3 | 14.7 | 14.7 | 15.0 |
| 2022-08-25 9:00 AM  | 15.2 | 14.6 | 14.6 | 14.9 |
| 2022-08-25 10:00 AM | 15.9 | 15.2 | 15.2 | 15.5 |

|                     |      |      |      |      |
|---------------------|------|------|------|------|
| 2022-08-25 11:00 AM | 16.4 | 15.8 | 15.8 | 16.1 |
| 2022-08-25 12:00 PM | 17.4 | 16.7 | 16.7 | 17.1 |
| 2022-08-25 1:00 PM  | 20.2 | 18.8 | 18.8 | 19.5 |
| 2022-08-25 2:00 PM  | 20.1 | 19.2 | 19.2 | 19.7 |
| 2022-08-25 3:00 PM  | 19.8 | 20.0 | 20.0 | 19.9 |
| 2022-08-25 4:00 PM  | 19.7 | 20.1 | 20.1 | 19.9 |
| 2022-08-25 5:00 PM  | 19.0 | 18.8 | 18.8 | 18.9 |
| 2022-08-25 6:00 PM  | 18.7 | 18.5 | 18.5 | 18.6 |
| 2022-08-25 7:00 PM  | 18.4 | 18.2 | 18.2 | 18.3 |
| 2022-08-25 8:00 PM  | 18.0 | 17.8 | 17.8 | 17.9 |
| 2022-08-25 9:00 PM  | 17.6 | 17.5 | 17.5 | 17.6 |
| 2022-08-25 10:00 PM | 17.3 | 17.2 | 17.2 | 17.3 |
| 2022-08-25 11:00 PM | 17.2 | 17.1 | 17.1 | 17.2 |
| 2022-08-26 12:00 AM | 16.9 | 16.9 | 16.9 | 16.9 |
| 2022-08-26 1:00 AM  | 16.8 | 16.7 | 16.7 | 16.8 |
| 2022-08-26 2:00 AM  | 16.8 | 16.7 | 16.7 | 16.8 |
| 2022-08-26 3:00 AM  | 16.4 | 16.4 | 16.4 | 16.4 |
| 2022-08-26 4:00 AM  | 15.9 | 15.9 | 15.9 | 15.9 |
| 2022-08-26 5:00 AM  | 15.9 | 15.9 | 15.9 | 15.9 |
| 2022-08-26 6:00 AM  | 15.8 | 15.8 | 15.8 | 15.8 |
| 2022-08-26 7:00 AM  | 15.6 | 15.6 | 15.6 | 15.6 |
| 2022-08-26 8:00 AM  | 15.8 | 15.8 | 15.8 | 15.8 |
| 2022-08-26 9:00 AM  | 16.0 | 16.0 | 16.0 | 16.0 |
| 2022-08-26 10:00 AM | 16.4 | 16.3 | 16.3 | 16.3 |
| 2022-08-26 11:00 AM | 17.2 | 16.9 | 16.9 | 17.1 |
| 2022-08-26 12:00 PM | 19.4 | 18.7 | 18.7 | 19.1 |
| 2022-08-26 1:00 PM  | 20.8 | 19.9 | 19.9 | 20.3 |
| 2022-08-26 2:00 PM  | 21.6 | 21.1 | 21.1 | 21.4 |
| 2022-08-26 3:00 PM  | 21.6 | 21.9 | 21.9 | 21.8 |
| 2022-08-26 4:00 PM  | 21.2 | 21.7 | 21.7 | 21.5 |
| 2022-08-26 5:00 PM  | 21.2 | 21.8 | 21.8 | 21.5 |
| 2022-08-26 6:00 PM  | 21.0 | 21.5 | 21.5 | 21.3 |
| 2022-08-26 7:00 PM  | 20.5 | 20.9 | 20.9 | 20.7 |
| 2022-08-26 8:00 PM  | 20.1 | 20.4 | 20.4 | 20.3 |
| 2022-08-26 9:00 PM  | 19.6 | 19.8 | 19.8 | 19.7 |
| 2022-08-26 10:00 PM | 18.9 | 19.1 | 19.1 | 19.0 |
| 2022-08-26 11:00 PM | 18.6 | 18.8 | 18.8 | 18.7 |
| 2022-08-27 12:00 AM | 18.2 | 18.5 | 18.5 | 18.4 |
| 2022-08-27 1:00 AM  | 17.8 | 18.0 | 18.0 | 17.9 |
| 2022-08-27 2:00 AM  | 17.6 | 17.7 | 17.7 | 17.7 |
| 2022-08-27 3:00 AM  | 17.4 | 17.5 | 17.5 | 17.4 |
| 2022-08-27 4:00 AM  | 17.1 | 17.2 | 17.2 | 17.2 |
| 2022-08-27 5:00 AM  | 16.9 | 16.9 | 16.9 | 16.9 |

|                     |      |      |      |      |
|---------------------|------|------|------|------|
| 2022-08-27 6:00 AM  | 16.6 | 16.6 | 16.6 | 16.6 |
| 2022-08-27 7:00 AM  | 16.4 | 16.3 | 16.3 | 16.3 |
| 2022-08-27 8:00 AM  | 16.2 | 16.0 | 16.0 | 16.1 |
| 2022-08-27 9:00 AM  | 16.5 | 16.3 | 16.3 | 16.4 |
| 2022-08-27 10:00 AM | 17.4 | 17.3 | 17.3 | 17.3 |
| 2022-08-27 11:00 AM | 18.4 | 18.3 | 18.3 | 18.3 |
| 2022-08-27 12:00 PM | 19.8 | 19.5 | 19.5 | 19.6 |
| 2022-08-27 1:00 PM  | 21.0 | 20.2 | 20.2 | 20.6 |
| 2022-08-27 2:00 PM  | 20.1 | 19.7 | 19.7 | 19.9 |
| 2022-08-27 3:00 PM  | 19.9 | 19.5 | 19.5 | 19.7 |
| 2022-08-27 4:00 PM  | 19.3 | 19.0 | 19.0 | 19.1 |
| 2022-08-27 5:00 PM  | 18.7 | 18.5 | 18.5 | 18.6 |
| 2022-08-27 6:00 PM  | 18.7 | 18.5 | 18.5 | 18.6 |
| 2022-08-27 7:00 PM  | 18.5 | 18.5 | 18.5 | 18.5 |
| 2022-08-27 8:00 PM  | 18.5 | 18.5 | 18.5 | 18.5 |
| 2022-08-27 9:00 PM  | 18.4 | 18.4 | 18.4 | 18.4 |
| 2022-08-27 10:00 PM | 18.4 | 18.3 | 18.3 | 18.3 |
| 2022-08-27 11:00 PM | 18.4 | 18.3 | 18.3 | 18.3 |
| 2022-08-28 12:00 AM | 18.2 | 18.2 | 18.2 | 18.2 |
| 2022-08-28 1:00 AM  | 18.0 | 18.1 | 18.1 | 18.1 |
| 2022-08-28 2:00 AM  | 18.2 | 18.3 | 18.3 | 18.3 |
| 2022-08-28 3:00 AM  | 18.2 | 18.3 | 18.3 | 18.3 |
| 2022-08-28 4:00 AM  | 18.2 | 18.3 | 18.3 | 18.3 |
| 2022-08-28 5:00 AM  | 18.2 | 18.3 | 18.3 | 18.3 |
| 2022-08-28 6:00 AM  | 18.1 | 18.2 | 18.2 | 18.2 |
| 2022-08-28 7:00 AM  | 17.8 | 17.9 | 17.9 | 17.8 |
| 2022-08-28 8:00 AM  | 17.8 | 17.9 | 17.9 | 17.8 |
| 2022-08-28 9:00 AM  | 18.0 | 18.1 | 18.1 | 18.1 |
| 2022-08-28 10:00 AM | 18.2 | 18.3 | 18.3 | 18.3 |
| 2022-08-28 11:00 AM | 18.9 | 18.9 | 18.9 | 18.9 |
| 2022-08-28 12:00 PM | 19.8 | 19.6 | 19.6 | 19.7 |
| 2022-08-28 1:00 PM  | 20.4 | 20.2 | 20.2 | 20.3 |
| 2022-08-28 2:00 PM  | 20.0 | 19.9 | 19.9 | 19.9 |
| 2022-08-28 3:00 PM  | 20.0 | 20.0 | 20.0 | 20.0 |
| 2022-08-28 4:00 PM  | 20.2 | 20.2 | 20.2 | 20.2 |
| 2022-08-28 5:00 PM  | 19.8 | 19.8 | 19.8 | 19.8 |
| 2022-08-28 6:00 PM  | 19.6 | 19.6 | 19.6 | 19.6 |
| 2022-08-28 7:00 PM  | 19.7 | 19.7 | 19.7 | 19.7 |
| 2022-08-28 8:00 PM  | 19.5 | 19.6 | 19.6 | 19.6 |
| 2022-08-28 9:00 PM  | 19.1 | 19.2 | 19.2 | 19.2 |
| 2022-08-28 10:00 PM | 18.9 | 19.0 | 19.0 | 18.9 |
| 2022-08-28 11:00 PM | 18.7 | 18.7 | 18.7 | 18.7 |
| 2022-08-29 12:00 AM | 18.3 | 18.5 | 18.5 | 18.4 |

|                     |      |      |      |      |
|---------------------|------|------|------|------|
| 2022-08-29 1:00 AM  | 18.0 | 18.1 | 18.1 | 18.1 |
| 2022-08-29 2:00 AM  | 17.8 | 18.0 | 18.0 | 17.9 |
| 2022-08-29 3:00 AM  | 18.0 | 18.0 | 18.0 | 18.0 |
| 2022-08-29 4:00 AM  | 18.0 | 18.1 | 18.1 | 18.1 |
| 2022-08-29 5:00 AM  | 18.0 | 18.1 | 18.1 | 18.1 |
| 2022-08-29 6:00 AM  | 18.0 | 18.1 | 18.1 | 18.1 |
| 2022-08-29 7:00 AM  | 18.1 | 18.1 | 18.1 | 18.1 |
| 2022-08-29 8:00 AM  | 17.9 | 18.0 | 18.0 | 17.9 |
| 2022-08-29 9:00 AM  | 18.2 | 18.2 | 18.2 | 18.2 |
| 2022-08-29 10:00 AM | 18.3 | 18.4 | 18.4 | 18.3 |
| 2022-08-29 11:00 AM | 19.2 | 19.1 | 19.1 | 19.2 |
| 2022-08-29 12:00 PM | 21.6 | 20.9 | 20.9 | 21.3 |
| 2022-08-29 1:00 PM  | 22.5 | 21.6 | 21.6 | 22.1 |
| 2022-08-29 2:00 PM  | 23.1 | 22.1 | 22.1 | 22.6 |
| 2022-08-29 3:00 PM  | 22.0 | 22.5 | 22.5 | 22.3 |
| 2022-08-29 4:00 PM  | 21.4 | 22.7 | 22.7 | 22.1 |
| 2022-08-29 5:00 PM  | 21.3 | 21.9 | 21.9 | 21.6 |
| 2022-08-29 6:00 PM  | 20.9 | 21.1 | 21.1 | 21.0 |
| 2022-08-29 7:00 PM  | 20.4 | 20.4 | 20.4 | 20.4 |
| 2022-08-29 8:00 PM  | 20.1 | 20.1 | 20.1 | 20.1 |
| 2022-08-29 9:00 PM  | 19.1 | 19.2 | 19.2 | 19.2 |
| 2022-08-29 10:00 PM | 18.7 | 18.8 | 18.8 | 18.8 |
| 2022-08-29 11:00 PM | 18.4 | 18.5 | 18.5 | 18.4 |
| 2022-08-30 12:00 AM | 18.4 | 18.5 | 18.5 | 18.4 |
| 2022-08-30 1:00 AM  | 18.0 | 18.1 | 18.1 | 18.1 |
| 2022-08-30 2:00 AM  | 17.5 | 17.7 | 17.7 | 17.6 |
| 2022-08-30 3:00 AM  | 17.4 | 17.5 | 17.5 | 17.4 |
| 2022-08-30 4:00 AM  | 17.4 | 17.4 | 17.4 | 17.4 |
| 2022-08-30 5:00 AM  | 17.4 | 17.4 | 17.4 | 17.4 |
| 2022-08-30 6:00 AM  | 17.1 | 17.2 | 17.2 | 17.2 |
| 2022-08-30 7:00 AM  | 16.7 | 16.7 | 16.7 | 16.7 |
| 2022-08-30 8:00 AM  | 16.0 | 15.9 | 15.9 | 15.9 |
| 2022-08-30 9:00 AM  | 15.4 | 15.3 | 15.3 | 15.3 |
| 2022-08-30 10:00 AM | 15.6 | 15.3 | 15.3 | 15.5 |
| 2022-08-30 11:00 AM | 16.4 | 16.0 | 16.0 | 16.2 |
| 2022-08-30 12:00 PM | 18.3 | 17.8 | 17.8 | 18.0 |
| 2022-08-30 1:00 PM  | 19.9 | 19.2 | 19.2 | 19.6 |
| 2022-08-30 2:00 PM  | 20.3 | 20.0 | 20.0 | 20.1 |
| 2022-08-30 3:00 PM  | 19.6 | 19.4 | 19.4 | 19.5 |
| 2022-08-30 4:00 PM  | 19.6 | 19.6 | 19.6 | 19.6 |
| 2022-08-30 5:00 PM  | 19.8 | 19.8 | 19.8 | 19.8 |
| 2022-08-30 6:00 PM  | 19.3 | 19.1 | 19.1 | 19.2 |
| 2022-08-30 7:00 PM  | 18.9 | 18.9 | 18.9 | 18.9 |

|                     |      |      |      |      |
|---------------------|------|------|------|------|
| 2022-08-30 8:00 PM  | 18.4 | 18.5 | 18.5 | 18.4 |
| 2022-08-30 9:00 PM  | 17.8 | 17.8 | 17.8 | 17.8 |
| 2022-08-30 10:00 PM | 17.1 | 17.2 | 17.2 | 17.2 |
| 2022-08-30 11:00 PM | 16.7 | 16.8 | 16.8 | 16.8 |
| 2022-08-31 12:00 AM | 16.4 | 16.5 | 16.5 | 16.4 |
| 2022-08-31 1:00 AM  | 16.2 | 16.3 | 16.3 | 16.3 |
| 2022-08-31 2:00 AM  | 16.0 | 16.1 | 16.1 | 16.1 |
| 2022-08-31 3:00 AM  | 15.8 | 15.8 | 15.8 | 15.8 |
| 2022-08-31 4:00 AM  | 15.5 | 15.6 | 15.6 | 15.6 |
| 2022-08-31 5:00 AM  | 15.4 | 15.5 | 15.5 | 15.4 |
| 2022-08-31 6:00 AM  | 15.1 | 15.3 | 15.3 | 15.2 |
| 2022-08-31 7:00 AM  | 14.9 | 15.1 | 15.1 | 15.0 |
| 2022-08-31 8:00 AM  | 14.5 | 14.7 | 14.7 | 14.6 |
| 2022-08-31 9:00 AM  | 14.3 | 14.5 | 14.5 | 14.4 |
| 2022-08-31 10:00 AM | 14.4 | 14.3 | 14.3 | 14.3 |
| 2022-08-31 11:00 AM | 15.0 | 14.7 | 14.7 | 14.8 |
| 2022-08-31 12:00 PM | 16.8 | 16.4 | 16.4 | 16.6 |
| 2022-08-31 1:00 PM  | 18.5 | 17.9 | 17.9 | 18.2 |
| 2022-08-31 2:00 PM  | 19.0 | 18.7 | 18.7 | 18.9 |
| 2022-08-31 3:00 PM  | 17.2 | 18.3 | 18.3 | 17.8 |
| 2022-08-31 4:00 PM  | 16.4 | 18.7 | 18.7 | 17.6 |
| 2022-08-31 5:00 PM  | 17.2 | 18.6 | 18.6 | 17.9 |
| 2022-08-31 6:00 PM  | 17.4 | 18.3 | 18.3 | 17.8 |
| 2022-08-31 7:00 PM  | 16.8 | 17.4 | 17.4 | 17.1 |
| 2022-08-31 8:00 PM  | 16.3 | 16.7 | 16.7 | 16.5 |
| 2022-08-31 9:00 PM  | 15.9 | 16.0 | 16.0 | 15.9 |
| 2022-08-31 10:00 PM | 15.6 | 15.5 | 15.5 | 15.6 |
| 2022-08-31 11:00 PM | 15.3 | 15.3 | 15.3 | 15.3 |
| 2022-09-01 12:00 AM | 15.2 | 15.2 | 15.2 | 15.2 |
| 2022-09-01 1:00 AM  | 15.4 | 15.4 | 15.4 | 15.4 |
| 2022-09-01 2:00 AM  | 15.3 | 15.3 | 15.3 | 15.3 |
| 2022-09-01 3:00 AM  | 14.7 | 14.7 | 14.7 | 14.7 |
| 2022-09-01 4:00 AM  | 14.5 | 14.5 | 14.5 | 14.5 |
| 2022-09-01 5:00 AM  | 14.5 | 14.4 | 14.4 | 14.4 |
| 2022-09-01 6:00 AM  | 14.3 | 14.3 | 14.3 | 14.3 |
| 2022-09-01 7:00 AM  | 14.0 | 14.0 | 14.0 | 14.0 |
| 2022-09-01 8:00 AM  | 14.0 | 13.8 | 13.8 | 13.9 |
| 2022-09-01 9:00 AM  | 14.2 | 14.0 | 14.0 | 14.1 |
| 2022-09-01 10:00 AM | 15.1 | 14.8 | 14.8 | 15.0 |
| 2022-09-01 11:00 AM | 15.9 | 15.5 | 15.5 | 15.7 |
| 2022-09-01 12:00 PM | 17.1 | 16.6 | 16.6 | 16.9 |
| 2022-09-01 1:00 PM  | 19.5 | 18.2 | 18.2 | 18.9 |
| 2022-09-01 2:00 PM  | 20.4 | 19.7 | 19.7 | 20.1 |

|                     |      |      |      |      |
|---------------------|------|------|------|------|
| 2022-09-01 3:00 PM  | 19.3 | 19.8 | 19.8 | 19.5 |
| 2022-09-01 4:00 PM  | 19.1 | 20.1 | 20.1 | 19.6 |
| 2022-09-01 5:00 PM  | 19.2 | 19.9 | 19.9 | 19.6 |
| 2022-09-01 6:00 PM  | 19.2 | 19.7 | 19.7 | 19.5 |
| 2022-09-01 7:00 PM  | 18.3 | 18.6 | 18.6 | 18.4 |
| 2022-09-01 8:00 PM  | 17.8 | 18.0 | 18.0 | 17.9 |
| 2022-09-01 9:00 PM  | 17.3 | 17.5 | 17.5 | 17.4 |
| 2022-09-01 10:00 PM | 16.9 | 17.1 | 17.1 | 17.0 |
| 2022-09-01 11:00 PM | 16.4 | 16.7 | 16.7 | 16.6 |
| 2022-09-02 12:00 AM | 16.0 | 16.3 | 16.3 | 16.1 |
| 2022-09-02 1:00 AM  | 15.7 | 16.0 | 16.0 | 15.8 |
| 2022-09-02 2:00 AM  | 15.4 | 15.7 | 15.7 | 15.5 |
| 2022-09-02 3:00 AM  | 15.2 | 15.3 | 15.3 | 15.3 |
| 2022-09-02 4:00 AM  | 15.1 | 15.2 | 15.2 | 15.2 |
| 2022-09-02 5:00 AM  | 15.0 | 15.0 | 15.0 | 15.0 |
| 2022-09-02 6:00 AM  | 14.9 | 14.9 | 14.9 | 14.9 |
| 2022-09-02 7:00 AM  | 14.8 | 14.8 | 14.8 | 14.8 |
| 2022-09-02 8:00 AM  | 15.0 | 15.1 | 15.1 | 15.1 |
| 2022-09-02 9:00 AM  | 15.6 | 15.6 | 15.6 | 15.6 |
| 2022-09-02 10:00 AM | 16.3 | 16.3 | 16.3 | 16.3 |
| 2022-09-02 11:00 AM | 17.9 | 17.6 | 17.6 | 17.8 |
| 2022-09-02 12:00 PM | 18.7 | 18.6 | 18.6 | 18.7 |
| 2022-09-02 1:00 PM  | 19.2 | 19.1 | 19.1 | 19.2 |
| 2022-09-02 2:00 PM  | 21.5 | 21.3 | 21.3 | 21.4 |
| 2022-09-02 3:00 PM  | 21.8 | 22.1 | 22.1 | 21.9 |
| 2022-09-02 4:00 PM  | 21.3 | 21.6 | 21.6 | 21.4 |
| 2022-09-02 5:00 PM  | 20.9 | 21.7 | 21.7 | 21.3 |
| 2022-09-02 6:00 PM  | 20.7 | 21.6 | 21.6 | 21.2 |
| 2022-09-02 7:00 PM  | 20.0 | 20.8 | 20.8 | 20.4 |
| 2022-09-02 8:00 PM  | 19.2 | 20.2 | 20.2 | 19.7 |
| 2022-09-02 9:00 PM  | 18.4 | 19.0 | 19.0 | 18.7 |
| 2022-09-02 10:00 PM | 17.8 | 18.1 | 18.1 | 17.9 |
| 2022-09-02 11:00 PM | 17.1 | 17.3 | 17.3 | 17.2 |
| 2022-09-03 12:00 AM | 16.6 | 16.8 | 16.8 | 16.7 |
| 2022-09-03 1:00 AM  | 16.1 | 16.2 | 16.2 | 16.2 |
| 2022-09-03 2:00 AM  | 15.5 | 15.5 | 15.5 | 15.5 |
| 2022-09-03 3:00 AM  | 14.8 | 14.6 | 14.6 | 14.7 |
| 2022-09-03 4:00 AM  | 14.2 | 13.8 | 13.8 | 14.0 |
| 2022-09-03 5:00 AM  | 13.4 | 12.9 | 12.9 | 13.1 |
| 2022-09-03 6:00 AM  | 12.9 | 13.0 | 13.0 | 12.9 |
| 2022-09-03 7:00 AM  | 12.2 | 12.6 | 12.6 | 12.4 |
| 2022-09-03 8:00 AM  | 11.9 | 12.3 | 12.3 | 12.1 |
| 2022-09-03 9:00 AM  | 12.0 | 12.1 | 12.1 | 12.1 |



|                     |      |      |      |      |
|---------------------|------|------|------|------|
| 2022-09-03 10:00 AM | 12.4 | 12.0 | 12.0 | 12.2 |
| 2022-09-03 11:00 AM | 13.0 | 12.2 | 12.2 | 12.6 |
| 2022-09-03 12:00 PM | 14.1 | 13.9 | 13.9 | 14.0 |
| 2022-09-03 1:00 PM  | 16.7 | 15.4 | 15.4 | 16.1 |
| 2022-09-03 2:00 PM  | 17.4 | 16.5 | 16.5 | 16.9 |
| 2022-09-03 3:00 PM  | 16.9 | 17.4 | 17.4 | 17.1 |
| 2022-09-03 4:00 PM  | 17.0 | 18.0 | 18.0 | 17.5 |
| 2022-09-03 5:00 PM  | 16.9 | 17.5 | 17.5 | 17.2 |
| 2022-09-03 6:00 PM  | 16.5 | 16.7 | 16.7 | 16.6 |
| 2022-09-03 7:00 PM  | 15.6 | 15.7 | 15.7 | 15.7 |
| 2022-09-03 8:00 PM  | 15.1 | 15.3 | 15.3 | 15.2 |
| 2022-09-03 9:00 PM  | 14.4 | 14.7 | 14.7 | 14.5 |
| 2022-09-03 10:00 PM | 13.8 | 13.9 | 13.9 | 13.8 |
| 2022-09-03 11:00 PM | 13.2 | 13.6 | 13.6 | 13.4 |
| 2022-09-04 12:00 AM | 12.7 | 12.9 | 12.9 | 12.8 |
| 2022-09-04 1:00 AM  | 12.1 | 12.1 | 12.1 | 12.1 |
| 2022-09-04 2:00 AM  | 11.5 | 11.9 | 11.9 | 11.7 |
| 2022-09-04 3:00 AM  | 11.1 | 11.1 | 11.1 | 11.1 |
| 2022-09-04 4:00 AM  | 10.5 | 10.9 | 10.9 | 10.7 |
| 2022-09-04 5:00 AM  | 10.1 | 10.1 | 10.1 | 10.1 |
| 2022-09-04 6:00 AM  | 9.7  | 9.9  | 9.9  | 9.8  |
| 2022-09-04 7:00 AM  | 9.1  | 9.7  | 9.7  | 9.4  |
| 2022-09-04 8:00 AM  | 9.0  | 9.7  | 9.7  | 9.3  |
| 2022-09-04 9:00 AM  | 9.5  | 9.7  | 9.7  | 9.6  |
| 2022-09-04 10:00 AM | 10.6 | 10.6 | 10.6 | 10.6 |
| 2022-09-04 11:00 AM | 12.4 | 12.1 | 12.1 | 12.3 |
| 2022-09-04 12:00 PM | 14.4 | 14.8 | 14.8 | 14.6 |
| 2022-09-04 1:00 PM  | 17.3 | 16.4 | 16.4 | 16.8 |
| 2022-09-04 2:00 PM  | 17.7 | 17.2 | 17.2 | 17.5 |
| 2022-09-04 3:00 PM  | 17.1 | 17.8 | 17.8 | 17.4 |
| 2022-09-04 4:00 PM  | 16.8 | 17.9 | 17.9 | 17.3 |
| 2022-09-04 5:00 PM  | 16.3 | 17.0 | 17.0 | 16.6 |
| 2022-09-04 6:00 PM  | 15.9 | 16.2 | 16.2 | 16.1 |
| 2022-09-04 7:00 PM  | 14.9 | 15.2 | 15.2 | 15.0 |
| 2022-09-04 8:00 PM  | 14.2 | 14.6 | 14.6 | 14.4 |
| 2022-09-04 9:00 PM  | 13.4 | 13.9 | 13.9 | 13.6 |
| 2022-09-04 10:00 PM | 13.0 | 13.2 | 13.2 | 13.1 |
| 2022-09-04 11:00 PM | 12.4 | 12.6 | 12.6 | 12.5 |
| 2022-09-05 12:00 AM | 11.8 | 11.9 | 11.9 | 11.8 |
| 2022-09-05 1:00 AM  | 11.3 | 11.2 | 11.2 | 11.3 |
| 2022-09-05 2:00 AM  | 10.8 | 10.7 | 10.7 | 10.8 |
| 2022-09-05 3:00 AM  | 10.4 | 10.5 | 10.5 | 10.4 |
| 2022-09-05 4:00 AM  | 10.1 | 9.8  | 9.8  | 10.0 |

|                     |      |      |      |      |
|---------------------|------|------|------|------|
| 2022-09-05 5:00 AM  | 9.6  | 9.8  | 9.8  | 9.7  |
| 2022-09-05 6:00 AM  | 9.0  | 9.7  | 9.7  | 9.3  |
| 2022-09-05 7:00 AM  | 8.8  | 9.3  | 9.3  | 9.1  |
| 2022-09-05 8:00 AM  | 8.6  | 9.2  | 9.2  | 8.9  |
| 2022-09-05 9:00 AM  | 8.9  | 9.3  | 9.3  | 9.1  |
| 2022-09-05 10:00 AM | 9.8  | 10.0 | 10.0 | 9.9  |
| 2022-09-05 11:00 AM | 11.7 | 11.6 | 11.6 | 11.7 |
| 2022-09-05 12:00 PM | 13.6 | 14.2 | 14.2 | 13.9 |
| 2022-09-05 1:00 PM  | 16.7 | 16.0 | 16.0 | 16.4 |
| 2022-09-05 2:00 PM  | 17.3 | 17.0 | 17.0 | 17.1 |
| 2022-09-05 3:00 PM  | 16.8 | 17.6 | 17.6 | 17.2 |
| 2022-09-05 4:00 PM  | 16.7 | 17.8 | 17.8 | 17.3 |
| 2022-09-05 5:00 PM  | 16.7 | 17.4 | 17.4 | 17.1 |
| 2022-09-05 6:00 PM  | 16.3 | 16.7 | 16.7 | 16.5 |
| 2022-09-05 7:00 PM  | 15.3 | 15.7 | 15.7 | 15.5 |
| 2022-09-05 8:00 PM  | 14.7 | 15.2 | 15.2 | 14.9 |
| 2022-09-05 9:00 PM  | 14.1 | 14.6 | 14.6 | 14.4 |
| 2022-09-05 10:00 PM | 13.5 | 14.0 | 14.0 | 13.8 |
| 2022-09-05 11:00 PM | 13.2 | 13.4 | 13.4 | 13.3 |
| 2022-09-06 12:00 AM | 12.8 | 13.0 | 13.0 | 12.9 |
| 2022-09-06 1:00 AM  | 12.4 | 12.6 | 12.6 | 12.5 |
| 2022-09-06 2:00 AM  | 12.0 | 11.9 | 11.9 | 11.9 |
| 2022-09-06 3:00 AM  | 11.7 | 11.7 | 11.7 | 11.7 |
| 2022-09-06 4:00 AM  | 11.3 | 11.6 | 11.6 | 11.5 |
| 2022-09-06 5:00 AM  | 10.8 | 11.3 | 11.3 | 11.1 |
| 2022-09-06 6:00 AM  | 10.3 | 10.9 | 10.9 | 10.6 |
| 2022-09-06 7:00 AM  | 10.0 | 10.7 | 10.7 | 10.3 |
| 2022-09-06 8:00 AM  | 9.8  | 10.5 | 10.5 | 10.2 |
| 2022-09-06 9:00 AM  | 10.1 | 10.6 | 10.6 | 10.4 |
| 2022-09-06 10:00 AM | 11.2 | 11.3 | 11.3 | 11.3 |
| 2022-09-06 11:00 AM | 12.8 | 12.6 | 12.6 | 12.7 |
| 2022-09-06 12:00 PM | 14.9 | 15.2 | 15.2 | 15.0 |
| 2022-09-06 1:00 PM  | 17.4 | 16.9 | 16.9 | 17.1 |
| 2022-09-06 2:00 PM  | 18.1 | 18.1 | 18.1 | 18.1 |
| 2022-09-06 3:00 PM  | 17.1 | 18.1 | 18.1 | 17.6 |
| 2022-09-06 4:00 PM  | 17.7 | 19.0 | 19.0 | 18.4 |
| 2022-09-06 5:00 PM  | 17.8 | 18.8 | 18.8 | 18.3 |
| 2022-09-06 6:00 PM  | 17.6 | 18.2 | 18.2 | 17.9 |
| 2022-09-06 7:00 PM  | 16.9 | 17.3 | 17.3 | 17.1 |
| 2022-09-06 8:00 PM  | 16.5 | 16.8 | 16.8 | 16.6 |
| 2022-09-06 9:00 PM  | 16.0 | 16.3 | 16.3 | 16.1 |
| 2022-09-06 10:00 PM | 15.6 | 16.0 | 16.0 | 15.8 |
| 2022-09-06 11:00 PM | 15.4 | 15.7 | 15.7 | 15.5 |

|                     |      |      |      |      |
|---------------------|------|------|------|------|
| 2022-09-07 12:00 AM | 15.2 | 15.5 | 15.5 | 15.3 |
| 2022-09-07 1:00 AM  | 14.9 | 15.3 | 15.3 | 15.1 |
| 2022-09-07 2:00 AM  | 14.6 | 15.0 | 15.0 | 14.8 |
| 2022-09-07 3:00 AM  | 14.1 | 14.6 | 14.6 | 14.4 |
| 2022-09-07 4:00 AM  | 13.9 | 14.3 | 14.3 | 14.1 |
| 2022-09-07 5:00 AM  | 13.7 | 14.2 | 14.2 | 13.9 |
| 2022-09-07 6:00 AM  | 13.5 | 14.0 | 14.0 | 13.8 |
| 2022-09-07 7:00 AM  | 13.2 | 13.7 | 13.7 | 13.4 |
| 2022-09-07 8:00 AM  | 13.0 | 13.5 | 13.5 | 13.3 |
| 2022-09-07 9:00 AM  | 13.2 | 13.6 | 13.6 | 13.4 |
| 2022-09-07 10:00 AM | 14.2 | 14.3 | 14.3 | 14.3 |
| 2022-09-07 11:00 AM | 15.5 | 15.4 | 15.4 | 15.4 |
| 2022-09-07 12:00 PM | 18.0 | 17.9 | 17.9 | 17.9 |
| 2022-09-07 1:00 PM  | 20.2 | 19.7 | 19.7 | 20.0 |
| 2022-09-07 2:00 PM  | 21.2 | 20.9 | 20.9 | 21.1 |
| 2022-09-07 3:00 PM  | 20.5 | 21.1 | 21.1 | 20.8 |
| 2022-09-07 4:00 PM  | 20.5 | 21.4 | 21.4 | 20.9 |
| 2022-09-07 5:00 PM  | 20.0 | 20.5 | 20.5 | 20.3 |
| 2022-09-07 6:00 PM  | 19.2 | 19.5 | 19.5 | 19.4 |
| 2022-09-07 7:00 PM  | 18.2 | 18.3 | 18.3 | 18.3 |
| 2022-09-07 8:00 PM  | 17.3 | 17.4 | 17.4 | 17.3 |
| 2022-09-07 9:00 PM  | 16.3 | 16.5 | 16.5 | 16.4 |
| 2022-09-07 10:00 PM | 15.7 | 15.9 | 15.9 | 15.8 |
| 2022-09-07 11:00 PM | 15.0 | 15.2 | 15.2 | 15.1 |
| 2022-09-08 12:00 AM | 14.4 | 14.5 | 14.5 | 14.4 |
| 2022-09-08 1:00 AM  | 13.8 | 13.7 | 13.7 | 13.8 |
| 2022-09-08 2:00 AM  | 13.2 | 12.9 | 12.9 | 13.0 |
| 2022-09-08 3:00 AM  | 12.8 | 12.4 | 12.4 | 12.6 |
| 2022-09-08 4:00 AM  | 12.3 | 12.1 | 12.1 | 12.2 |
| 2022-09-08 5:00 AM  | 12.0 | 11.9 | 11.9 | 11.9 |
| 2022-09-08 6:00 AM  | 11.7 | 11.5 | 11.5 | 11.6 |
| 2022-09-08 7:00 AM  | 11.8 | 11.5 | 11.5 | 11.7 |
| 2022-09-08 8:00 AM  | 11.8 | 11.9 | 11.9 | 11.8 |
| 2022-09-08 9:00 AM  | 12.3 | 12.3 | 12.3 | 12.3 |
| 2022-09-08 10:00 AM | 14.1 | 13.8 | 13.8 | 14.0 |
| 2022-09-08 11:00 AM | 15.3 | 15.0 | 15.0 | 15.2 |
| 2022-09-08 12:00 PM | 17.6 | 17.1 | 17.1 | 17.4 |
| 2022-09-08 1:00 PM  | 18.4 | 18.1 | 18.1 | 18.3 |
| 2022-09-08 2:00 PM  | 18.6 | 18.4 | 18.4 | 18.5 |
| 2022-09-08 3:00 PM  | 18.3 | 18.2 | 18.2 | 18.3 |
| 2022-09-08 4:00 PM  | 18.7 | 18.6 | 18.6 | 18.7 |
| 2022-09-08 5:00 PM  | 18.5 | 18.4 | 18.4 | 18.4 |
| 2022-09-08 6:00 PM  | 18.3 | 18.2 | 18.2 | 18.3 |

|                     |      |      |      |      |
|---------------------|------|------|------|------|
| 2022-09-08 7:00 PM  | 18.0 | 18.0 | 18.0 | 18.0 |
| 2022-09-08 8:00 PM  | 17.8 | 17.8 | 17.8 | 17.8 |
| 2022-09-08 9:00 PM  | 17.4 | 17.6 | 17.6 | 17.5 |
| 2022-09-08 10:00 PM | 17.5 | 17.7 | 17.7 | 17.6 |
| 2022-09-08 11:00 PM | 17.4 | 17.5 | 17.5 | 17.4 |
| 2022-09-09 12:00 AM | 17.4 | 17.6 | 17.6 | 17.5 |
| 2022-09-09 1:00 AM  | 17.3 | 17.4 | 17.4 | 17.3 |
| 2022-09-09 2:00 AM  | 17.3 | 17.4 | 17.4 | 17.3 |
| 2022-09-09 3:00 AM  | 17.3 | 17.5 | 17.5 | 17.4 |
| 2022-09-09 4:00 AM  | 17.5 | 17.7 | 17.7 | 17.6 |
| 2022-09-09 5:00 AM  | 17.3 | 17.5 | 17.5 | 17.4 |
| 2022-09-09 6:00 AM  | 17.2 | 17.3 | 17.3 | 17.3 |
| 2022-09-09 7:00 AM  | 16.9 | 17.1 | 17.1 | 17.0 |
| 2022-09-09 8:00 AM  | 16.6 | 16.7 | 16.7 | 16.7 |
| 2022-09-09 9:00 AM  | 16.3 | 16.5 | 16.5 | 16.4 |
| 2022-09-09 10:00 AM | 16.3 | 16.3 | 16.3 | 16.3 |
| 2022-09-09 11:00 AM | 16.2 | 16.1 | 16.1 | 16.2 |
| 2022-09-09 12:00 PM | 15.9 | 16.0 | 16.0 | 15.9 |
| 2022-09-09 1:00 PM  | 15.6 | 15.6 | 15.6 | 15.6 |
| 2022-09-09 2:00 PM  | 15.6 | 15.4 | 15.4 | 15.5 |
| 2022-09-09 3:00 PM  | 15.5 | 15.5 | 15.5 | 15.5 |
| 2022-09-09 4:00 PM  | 15.5 | 15.4 | 15.4 | 15.4 |
| 2022-09-09 5:00 PM  | 15.5 | 15.6 | 15.6 | 15.6 |
| 2022-09-09 6:00 PM  | 15.4 | 15.6 | 15.6 | 15.5 |
| 2022-09-09 7:00 PM  | 15.4 | 15.5 | 15.5 | 15.4 |
| 2022-09-09 8:00 PM  | 15.2 | 15.4 | 15.4 | 15.3 |
| 2022-09-09 9:00 PM  | 15.0 | 15.2 | 15.2 | 15.1 |
| 2022-09-09 10:00 PM | 14.9 | 15.1 | 15.1 | 15.0 |
| 2022-09-09 11:00 PM | 14.8 | 15.1 | 15.1 | 15.0 |
| 2022-09-10 12:00 AM | 14.7 | 14.9 | 14.9 | 14.8 |
| 2022-09-10 1:00 AM  | 14.6 | 14.9 | 14.9 | 14.8 |
| 2022-09-10 2:00 AM  | 14.6 | 14.8 | 14.8 | 14.7 |
| 2022-09-10 3:00 AM  | 14.5 | 14.7 | 14.7 | 14.6 |
| 2022-09-10 4:00 AM  | 14.3 | 14.6 | 14.6 | 14.5 |
| 2022-09-10 5:00 AM  | 14.1 | 14.4 | 14.4 | 14.3 |
| 2022-09-10 6:00 AM  | 13.7 | 14.2 | 14.2 | 13.9 |
| 2022-09-10 7:00 AM  | 13.7 | 14.0 | 14.0 | 13.8 |
| 2022-09-10 8:00 AM  | 13.4 | 13.9 | 13.9 | 13.6 |
| 2022-09-10 9:00 AM  | 13.6 | 14.0 | 14.0 | 13.8 |
| 2022-09-10 10:00 AM | 14.4 | 14.4 | 14.4 | 14.4 |
| 2022-09-10 11:00 AM | 14.8 | 14.8 | 14.8 | 14.8 |
| 2022-09-10 12:00 PM | 15.4 | 15.3 | 15.3 | 15.3 |
| 2022-09-10 1:00 PM  | 16.4 | 16.1 | 16.1 | 16.3 |

|                     |      |      |      |      |
|---------------------|------|------|------|------|
| 2022-09-10 2:00 PM  | 16.7 | 16.4 | 16.4 | 16.6 |
| 2022-09-10 3:00 PM  | 17.3 | 17.4 | 17.4 | 17.3 |
| 2022-09-10 4:00 PM  | 17.8 | 18.0 | 18.0 | 17.9 |
| 2022-09-10 5:00 PM  | 17.1 | 17.0 | 17.0 | 17.1 |
| 2022-09-10 6:00 PM  | 16.7 | 16.5 | 16.5 | 16.6 |
| 2022-09-10 7:00 PM  | 16.1 | 16.1 | 16.1 | 16.1 |
| 2022-09-10 8:00 PM  | 15.5 | 15.6 | 15.6 | 15.6 |
| 2022-09-10 9:00 PM  | 14.7 | 15.0 | 15.0 | 14.8 |
| 2022-09-10 10:00 PM | 14.3 | 14.5 | 14.5 | 14.4 |
| 2022-09-10 11:00 PM | 13.8 | 13.9 | 13.9 | 13.8 |
| 2022-09-11 12:00 AM | 13.5 | 13.7 | 13.7 | 13.6 |
| 2022-09-11 1:00 AM  | 12.9 | 13.3 | 13.3 | 13.1 |
| 2022-09-11 2:00 AM  | 12.6 | 12.9 | 12.9 | 12.8 |
| 2022-09-11 3:00 AM  | 12.0 | 12.5 | 12.5 | 12.3 |
| 2022-09-11 4:00 AM  | 11.6 | 12.2 | 12.2 | 11.9 |
| 2022-09-11 5:00 AM  | 11.1 | 11.8 | 11.8 | 11.5 |
| 2022-09-11 6:00 AM  | 10.8 | 11.6 | 11.6 | 11.2 |
| 2022-09-11 7:00 AM  | 10.4 | 11.0 | 11.0 | 10.7 |
| 2022-09-11 8:00 AM  | 10.2 | 10.8 | 10.8 | 10.5 |
| 2022-09-11 9:00 AM  | 10.5 | 11.0 | 11.0 | 10.8 |
| 2022-09-11 10:00 AM | 11.5 | 11.7 | 11.7 | 11.6 |
| 2022-09-11 11:00 AM | 13.1 | 13.0 | 13.0 | 13.1 |
| 2022-09-11 12:00 PM | 16.8 | 15.4 | 15.4 | 16.1 |
| 2022-09-11 1:00 PM  | 17.6 | 16.9 | 16.9 | 17.3 |
| 2022-09-11 2:00 PM  | 18.2 | 17.9 | 17.9 | 18.1 |
| 2022-09-11 3:00 PM  | 17.8 | 18.1 | 18.1 | 17.9 |
| 2022-09-11 4:00 PM  | 17.7 | 17.8 | 17.8 | 17.8 |
| 2022-09-11 5:00 PM  | 17.6 | 17.7 | 17.7 | 17.7 |
| 2022-09-11 6:00 PM  | 17.4 | 17.3 | 17.3 | 17.3 |
| 2022-09-11 7:00 PM  | 16.5 | 16.4 | 16.4 | 16.4 |
| 2022-09-11 8:00 PM  | 15.8 | 15.9 | 15.9 | 15.8 |
| 2022-09-11 9:00 PM  | 14.9 | 15.1 | 15.1 | 15.0 |
| 2022-09-11 10:00 PM | 14.4 | 14.6 | 14.6 | 14.5 |
| 2022-09-11 11:00 PM | 13.8 | 14.2 | 14.2 | 14.0 |
| 2022-09-12 12:00 AM | 13.2 | 13.4 | 13.4 | 13.3 |
| 2022-09-12 1:00 AM  | 12.5 | 13.0 | 13.0 | 12.8 |
| 2022-09-12 2:00 AM  | 12.0 | 12.5 | 12.5 | 12.3 |
| 2022-09-12 3:00 AM  | 11.4 | 11.9 | 11.9 | 11.6 |
| 2022-09-12 4:00 AM  | 11.0 | 11.7 | 11.7 | 11.3 |
| 2022-09-12 5:00 AM  | 10.7 | 11.3 | 11.3 | 11.0 |
| 2022-09-12 6:00 AM  | 10.5 | 11.0 | 11.0 | 10.8 |
| 2022-09-12 7:00 AM  | 10.2 | 10.9 | 10.9 | 10.5 |
| 2022-09-12 8:00 AM  | 10.0 | 10.7 | 10.7 | 10.3 |

|                     |      |      |      |      |
|---------------------|------|------|------|------|
| 2022-09-12 9:00 AM  | 10.2 | 10.8 | 10.8 | 10.5 |
| 2022-09-12 10:00 AM | 11.4 | 11.6 | 11.6 | 11.5 |
| 2022-09-12 11:00 AM | 12.8 | 12.8 | 12.8 | 12.8 |
| 2022-09-12 12:00 PM | 16.3 | 15.0 | 15.0 | 15.6 |
| 2022-09-12 1:00 PM  | 17.9 | 17.1 | 17.1 | 17.5 |
| 2022-09-12 2:00 PM  | 18.5 | 18.2 | 18.2 | 18.4 |
| 2022-09-12 3:00 PM  | 18.2 | 18.8 | 18.8 | 18.5 |
| 2022-09-12 4:00 PM  | 17.8 | 18.3 | 18.3 | 18.0 |
| 2022-09-12 5:00 PM  | 17.4 | 17.8 | 17.8 | 17.6 |
| 2022-09-12 6:00 PM  | 17.2 | 17.2 | 17.2 | 17.2 |
| 2022-09-12 7:00 PM  | 16.5 | 16.6 | 16.6 | 16.6 |
| 2022-09-12 8:00 PM  | 16.0 | 16.1 | 16.1 | 16.1 |
| 2022-09-12 9:00 PM  | 15.4 | 15.6 | 15.6 | 15.5 |
| 2022-09-12 10:00 PM | 14.8 | 15.1 | 15.1 | 15.0 |
| 2022-09-12 11:00 PM | 14.3 | 14.6 | 14.6 | 14.5 |
| 2022-09-13 12:00 AM | 13.8 | 13.9 | 13.9 | 13.8 |
| 2022-09-13 1:00 AM  | 13.4 | 13.4 | 13.4 | 13.4 |
| 2022-09-13 2:00 AM  | 12.9 | 13.0 | 13.0 | 12.9 |
| 2022-09-13 3:00 AM  | 12.5 | 12.8 | 12.8 | 12.7 |
| 2022-09-13 4:00 AM  | 11.9 | 12.5 | 12.5 | 12.2 |
| 2022-09-13 5:00 AM  | 11.7 | 12.3 | 12.3 | 12.0 |
| 2022-09-13 6:00 AM  | 11.4 | 11.9 | 11.9 | 11.6 |
| 2022-09-13 7:00 AM  | 11.3 | 11.8 | 11.8 | 11.6 |
| 2022-09-13 8:00 AM  | 11.3 | 11.8 | 11.8 | 11.6 |
| 2022-09-13 9:00 AM  | 12.1 | 12.3 | 12.3 | 12.2 |
| 2022-09-13 10:00 AM | 13.1 | 13.0 | 13.0 | 13.1 |
| 2022-09-13 11:00 AM | 14.0 | 13.9 | 13.9 | 13.9 |
| 2022-09-13 12:00 PM | 16.3 | 15.2 | 15.2 | 15.7 |
| 2022-09-13 1:00 PM  | 16.5 | 16.1 | 16.1 | 16.3 |
| 2022-09-13 2:00 PM  | 16.5 | 16.3 | 16.3 | 16.4 |
| 2022-09-13 3:00 PM  | 16.3 | 16.5 | 16.5 | 16.4 |
| 2022-09-13 4:00 PM  | 15.8 | 15.9 | 15.9 | 15.8 |
| 2022-09-13 5:00 PM  | 15.4 | 15.3 | 15.3 | 15.3 |
| 2022-09-13 6:00 PM  | 15.0 | 14.9 | 14.9 | 14.9 |
| 2022-09-13 7:00 PM  | 14.7 | 14.7 | 14.7 | 14.7 |
| 2022-09-13 8:00 PM  | 14.1 | 14.2 | 14.2 | 14.2 |
| 2022-09-13 9:00 PM  | 13.2 | 13.4 | 13.4 | 13.3 |
| 2022-09-13 10:00 PM | 12.9 | 12.9 | 12.9 | 12.9 |
| 2022-09-13 11:00 PM | 12.5 | 12.3 | 12.3 | 12.4 |
| 2022-09-14 12:00 AM | 11.8 | 11.9 | 11.9 | 11.8 |
| 2022-09-14 1:00 AM  | 11.0 | 11.4 | 11.4 | 11.2 |
| 2022-09-14 2:00 AM  | 10.5 | 11.0 | 11.0 | 10.8 |
| 2022-09-14 3:00 AM  | 10.3 | 10.8 | 10.8 | 10.6 |

|                     |      |      |      |      |
|---------------------|------|------|------|------|
| 2022-09-14 4:00 AM  | 10.2 | 10.2 | 10.2 | 10.2 |
| 2022-09-14 5:00 AM  | 9.3  | 9.9  | 9.9  | 9.6  |
| 2022-09-14 6:00 AM  | 9.1  | 9.6  | 9.6  | 9.4  |
| 2022-09-14 7:00 AM  | 8.5  | 9.2  | 9.2  | 8.8  |
| 2022-09-14 8:00 AM  | 8.2  | 9.0  | 9.0  | 8.6  |
| 2022-09-14 9:00 AM  | 8.4  | 8.9  | 8.9  | 8.6  |
| 2022-09-14 10:00 AM | 9.3  | 9.6  | 9.6  | 9.5  |
| 2022-09-14 11:00 AM | 11.0 | 10.9 | 10.9 | 10.9 |
| 2022-09-14 12:00 PM | 14.4 | 12.6 | 12.6 | 13.5 |
| 2022-09-14 1:00 PM  | 15.5 | 14.1 | 14.1 | 14.8 |
| 2022-09-14 2:00 PM  | 15.5 | 14.6 | 14.6 | 15.1 |
| 2022-09-14 3:00 PM  | 15.1 | 15.3 | 15.3 | 15.2 |
| 2022-09-14 4:00 PM  | 14.8 | 15.0 | 15.0 | 14.9 |
| 2022-09-14 5:00 PM  | 14.4 | 14.7 | 14.7 | 14.5 |
| 2022-09-14 6:00 PM  | 13.8 | 13.9 | 13.9 | 13.8 |
| 2022-09-14 7:00 PM  | 13.0 | 13.1 | 13.1 | 13.1 |
| 2022-09-14 8:00 PM  | 12.7 | 12.8 | 12.8 | 12.8 |
| 2022-09-14 9:00 PM  | 12.1 | 12.4 | 12.4 | 12.3 |
| 2022-09-14 10:00 PM | 11.4 | 11.8 | 11.8 | 11.6 |
| 2022-09-14 11:00 PM | 11.2 | 11.2 | 11.2 | 11.2 |
| 2022-09-15 12:00 AM | 10.8 | 10.5 | 10.5 | 10.7 |
| 2022-09-15 1:00 AM  | 10.6 | 10.4 | 10.4 | 10.5 |
| 2022-09-15 2:00 AM  | 10.8 | 11.0 | 11.0 | 10.9 |
| 2022-09-15 3:00 AM  | 11.3 | 11.3 | 11.3 | 11.3 |
| 2022-09-15 4:00 AM  | 11.5 | 11.5 | 11.5 | 11.5 |
| 2022-09-15 5:00 AM  | 11.7 | 11.7 | 11.7 | 11.7 |
| 2022-09-15 6:00 AM  | 11.9 | 11.9 | 11.9 | 11.9 |
| 2022-09-15 7:00 AM  | 12.0 | 12.0 | 12.0 | 12.0 |
| 2022-09-15 8:00 AM  | 12.0 | 12.0 | 12.0 | 12.0 |
| 2022-09-15 9:00 AM  | 12.3 | 12.3 | 12.3 | 12.3 |
| 2022-09-15 10:00 AM | 12.4 | 12.4 | 12.4 | 12.4 |
| 2022-09-15 11:00 AM | 12.5 | 12.6 | 12.6 | 12.6 |
| 2022-09-15 12:00 PM | 12.8 | 12.8 | 12.8 | 12.8 |
| 2022-09-15 1:00 PM  | 13.1 | 13.1 | 13.1 | 13.1 |
| 2022-09-15 2:00 PM  | 13.2 | 13.2 | 13.2 | 13.2 |
| 2022-09-15 3:00 PM  | 13.4 | 13.4 | 13.4 | 13.4 |
| 2022-09-15 4:00 PM  | 13.6 | 13.6 | 13.6 | 13.6 |
| 2022-09-15 5:00 PM  | 13.6 | 13.6 | 13.6 | 13.6 |
| 2022-09-15 6:00 PM  | 13.8 | 13.8 | 13.8 | 13.8 |
| 2022-09-15 7:00 PM  | 13.7 | 13.9 | 13.9 | 13.8 |
| 2022-09-15 8:00 PM  | 13.7 | 13.9 | 13.9 | 13.8 |
| 2022-09-15 9:00 PM  | 13.7 | 13.8 | 13.8 | 13.8 |
| 2022-09-15 10:00 PM | 13.7 | 13.8 | 13.8 | 13.8 |

|                     |      |      |      |      |
|---------------------|------|------|------|------|
| 2022-09-15 11:00 PM | 13.7 | 13.9 | 13.9 | 13.8 |
| 2022-09-16 12:00 AM | 13.6 | 13.7 | 13.7 | 13.7 |
| 2022-09-16 1:00 AM  | 13.5 | 13.6 | 13.6 | 13.6 |
| 2022-09-16 2:00 AM  | 13.5 | 13.6 | 13.6 | 13.6 |
| 2022-09-16 3:00 AM  | 13.4 | 13.4 | 13.4 | 13.4 |
| 2022-09-16 4:00 AM  | 13.1 | 13.1 | 13.1 | 13.1 |
| 2022-09-16 5:00 AM  | 12.9 | 12.9 | 12.9 | 12.9 |
| 2022-09-16 6:00 AM  | 12.8 | 12.8 | 12.8 | 12.8 |
| 2022-09-16 7:00 AM  | 12.7 | 12.7 | 12.7 | 12.7 |
| 2022-09-16 8:00 AM  | 12.5 | 12.3 | 12.3 | 12.4 |
| 2022-09-16 9:00 AM  | 12.4 | 12.3 | 12.3 | 12.3 |
| 2022-09-16 10:00 AM | 12.5 | 12.4 | 12.4 | 12.4 |
| 2022-09-16 11:00 AM | 12.6 | 12.5 | 12.5 | 12.6 |
| 2022-09-16 12:00 PM | 12.7 | 12.6 | 12.6 | 12.7 |
| 2022-09-16 1:00 PM  | 12.9 | 12.7 | 12.7 | 12.8 |
| 2022-09-16 2:00 PM  | 13.0 | 12.9 | 12.9 | 12.9 |
| 2022-09-16 3:00 PM  | 12.9 | 12.8 | 12.8 | 12.8 |
| 2022-09-16 4:00 PM  | 12.9 | 12.9 | 12.9 | 12.9 |
| 2022-09-16 5:00 PM  | 13.0 | 12.9 | 12.9 | 12.9 |
| 2022-09-16 6:00 PM  | 13.0 | 13.0 | 13.0 | 13.0 |
| 2022-09-16 7:00 PM  | 13.0 | 13.0 | 13.0 | 13.0 |
| 2022-09-16 8:00 PM  | 13.0 | 13.0 | 13.0 | 13.0 |
| 2022-09-16 9:00 PM  | 13.1 | 13.2 | 13.2 | 13.2 |
| 2022-09-16 10:00 PM | 13.3 | 13.3 | 13.3 | 13.3 |
| 2022-09-16 11:00 PM | 13.4 | 13.5 | 13.5 | 13.4 |
| 2022-09-17 12:00 AM | 13.5 | 13.6 | 13.6 | 13.6 |
| 2022-09-17 1:00 AM  | 13.6 | 13.7 | 13.7 | 13.7 |
| 2022-09-17 2:00 AM  | 13.6 | 13.8 | 13.8 | 13.7 |
| 2022-09-17 3:00 AM  | 13.7 | 13.8 | 13.8 | 13.8 |
| 2022-09-17 4:00 AM  | 13.7 | 13.9 | 13.9 | 13.8 |
| 2022-09-17 5:00 AM  | 13.7 | 13.9 | 13.9 | 13.8 |
| 2022-09-17 6:00 AM  | 13.8 | 13.9 | 13.9 | 13.8 |
| 2022-09-17 7:00 AM  | 13.8 | 13.9 | 13.9 | 13.8 |
| 2022-09-17 8:00 AM  | 13.9 | 13.9 | 13.9 | 13.9 |
| 2022-09-17 9:00 AM  | 14.0 | 14.1 | 14.1 | 14.1 |
| 2022-09-17 10:00 AM | 14.3 | 14.3 | 14.3 | 14.3 |
| 2022-09-17 11:00 AM | 14.6 | 14.6 | 14.6 | 14.6 |
| 2022-09-17 12:00 PM | 14.9 | 14.9 | 14.9 | 14.9 |
| 2022-09-17 1:00 PM  | 15.3 | 15.2 | 15.2 | 15.3 |
| 2022-09-17 2:00 PM  | 15.8 | 15.5 | 15.5 | 15.7 |
| 2022-09-17 3:00 PM  | 15.8 | 15.6 | 15.6 | 15.7 |
| 2022-09-17 4:00 PM  | 15.7 | 15.6 | 15.6 | 15.7 |
| 2022-09-17 5:00 PM  | 15.6 | 15.5 | 15.5 | 15.6 |



|                     |      |      |      |      |
|---------------------|------|------|------|------|
| 2022-09-17 6:00 PM  | 15.5 | 15.4 | 15.4 | 15.4 |
| 2022-09-17 7:00 PM  | 15.4 | 15.4 | 15.4 | 15.4 |
| 2022-09-17 8:00 PM  | 15.2 | 15.3 | 15.3 | 15.3 |
| 2022-09-17 9:00 PM  | 15.2 | 15.3 | 15.3 | 15.3 |
| 2022-09-17 10:00 PM | 15.2 | 15.3 | 15.3 | 15.3 |
| 2022-09-17 11:00 PM | 15.1 | 15.2 | 15.2 | 15.2 |
| 2022-09-18 12:00 AM | 15.1 | 15.2 | 15.2 | 15.2 |
| 2022-09-18 1:00 AM  | 15.2 | 15.3 | 15.3 | 15.3 |
| 2022-09-18 2:00 AM  | 15.1 | 15.2 | 15.2 | 15.2 |
| 2022-09-18 3:00 AM  | 15.1 | 15.2 | 15.2 | 15.2 |
| 2022-09-18 4:00 AM  | 15.1 | 15.2 | 15.2 | 15.2 |
| 2022-09-18 5:00 AM  | 15.1 | 15.2 | 15.2 | 15.2 |
| 2022-09-18 6:00 AM  | 15.1 | 15.2 | 15.2 | 15.2 |
| 2022-09-18 7:00 AM  | 15.1 | 15.2 | 15.2 | 15.2 |
| 2022-09-18 8:00 AM  | 15.0 | 15.1 | 15.1 | 15.1 |
| 2022-09-18 9:00 AM  | 15.0 | 15.0 | 15.0 | 15.0 |
| 2022-09-18 10:00 AM | 15.0 | 15.1 | 15.1 | 15.1 |
| 2022-09-18 11:00 AM | 15.3 | 15.3 | 15.3 | 15.3 |
| 2022-09-18 12:00 PM | 15.5 | 15.5 | 15.5 | 15.5 |
| 2022-09-18 1:00 PM  | 16.2 | 16.0 | 16.0 | 16.1 |
| 2022-09-18 2:00 PM  | 17.0 | 16.7 | 16.7 | 16.9 |
| 2022-09-18 3:00 PM  | 17.2 | 17.0 | 17.0 | 17.1 |
| 2022-09-18 4:00 PM  | 17.4 | 17.3 | 17.3 | 17.3 |
| 2022-09-18 5:00 PM  | 17.1 | 17.0 | 17.0 | 17.1 |
| 2022-09-18 6:00 PM  | 17.1 | 16.9 | 16.9 | 17.0 |
| 2022-09-18 7:00 PM  | 16.9 | 16.8 | 16.8 | 16.8 |
| 2022-09-18 8:00 PM  | 16.5 | 16.5 | 16.5 | 16.5 |
| 2022-09-18 9:00 PM  | 16.1 | 16.2 | 16.2 | 16.2 |
| 2022-09-18 10:00 PM | 15.6 | 15.8 | 15.8 | 15.7 |
| 2022-09-18 11:00 PM | 15.0 | 15.2 | 15.2 | 15.1 |
| 2022-09-19 12:00 AM | 14.6 | 14.8 | 14.8 | 14.7 |
| 2022-09-19 1:00 AM  | 14.2 | 14.5 | 14.5 | 14.3 |
| 2022-09-19 2:00 AM  | 13.9 | 14.3 | 14.3 | 14.1 |
| 2022-09-19 3:00 AM  | 13.6 | 13.9 | 13.9 | 13.8 |
| 2022-09-19 4:00 AM  | 13.3 | 13.6 | 13.6 | 13.5 |
| 2022-09-19 5:00 AM  | 13.3 | 13.6 | 13.6 | 13.5 |
| 2022-09-19 6:00 AM  | 13.1 | 13.4 | 13.4 | 13.3 |
| 2022-09-19 7:00 AM  | 12.9 | 13.2 | 13.2 | 13.0 |
| 2022-09-19 8:00 AM  | 12.8 | 13.1 | 13.1 | 13.0 |
| 2022-09-19 9:00 AM  | 12.9 | 13.2 | 13.2 | 13.0 |
| 2022-09-19 10:00 AM | 13.7 | 13.8 | 13.8 | 13.8 |
| 2022-09-19 11:00 AM | 14.8 | 14.7 | 14.7 | 14.8 |
| 2022-09-19 12:00 PM | 17.2 | 15.8 | 15.8 | 16.5 |

|                     |      |      |      |      |
|---------------------|------|------|------|------|
| 2022-09-19 1:00 PM  | 18.3 | 17.2 | 17.2 | 17.8 |
| 2022-09-19 2:00 PM  | 19.1 | 19.1 | 19.1 | 19.1 |
| 2022-09-19 3:00 PM  | 18.7 | 19.4 | 19.4 | 19.1 |
| 2022-09-19 4:00 PM  | 18.3 | 18.5 | 18.5 | 18.4 |
| 2022-09-19 5:00 PM  | 17.9 | 18.2 | 18.2 | 18.1 |
| 2022-09-19 6:00 PM  | 17.5 | 17.6 | 17.6 | 17.6 |
| 2022-09-19 7:00 PM  | 16.7 | 16.9 | 16.9 | 16.8 |
| 2022-09-19 8:00 PM  | 16.3 | 16.5 | 16.5 | 16.4 |
| 2022-09-19 9:00 PM  | 15.7 | 16.0 | 16.0 | 15.8 |
| 2022-09-19 10:00 PM | 15.4 | 15.6 | 15.6 | 15.5 |
| 2022-09-19 11:00 PM | 15.1 | 15.4 | 15.4 | 15.3 |
| 2022-09-20 12:00 AM | 15.2 | 15.3 | 15.3 | 15.3 |
| 2022-09-20 1:00 AM  | 15.2 | 15.3 | 15.3 | 15.3 |
| 2022-09-20 2:00 AM  | 15.1 | 15.2 | 15.2 | 15.2 |
| 2022-09-20 3:00 AM  | 15.0 | 15.1 | 15.1 | 15.1 |
| 2022-09-20 4:00 AM  | 15.0 | 15.2 | 15.2 | 15.1 |
| 2022-09-20 5:00 AM  | 15.0 | 15.1 | 15.1 | 15.1 |
| 2022-09-20 6:00 AM  | 14.8 | 15.0 | 15.0 | 14.9 |
| 2022-09-20 7:00 AM  | 15.0 | 15.1 | 15.1 | 15.1 |
| 2022-09-20 8:00 AM  | 15.1 | 15.1 | 15.1 | 15.1 |
| 2022-09-20 9:00 AM  | 15.1 | 15.2 | 15.2 | 15.2 |
| 2022-09-20 10:00 AM | 15.4 | 15.4 | 15.4 | 15.4 |
| 2022-09-20 11:00 AM | 16.0 | 15.8 | 15.8 | 15.9 |
| 2022-09-20 12:00 PM | 17.5 | 16.8 | 16.8 | 17.1 |
| 2022-09-20 1:00 PM  | 19.1 | 18.2 | 18.2 | 18.7 |
| 2022-09-20 2:00 PM  | 19.5 | 19.9 | 19.9 | 19.7 |
| 2022-09-20 3:00 PM  | 19.6 | 20.5 | 20.5 | 20.1 |
| 2022-09-20 4:00 PM  | 19.1 | 19.3 | 19.3 | 19.2 |
| 2022-09-20 5:00 PM  | 18.4 | 18.5 | 18.5 | 18.4 |
| 2022-09-20 6:00 PM  | 17.8 | 17.9 | 17.9 | 17.8 |
| 2022-09-20 7:00 PM  | 17.7 | 17.8 | 17.8 | 17.8 |
| 2022-09-20 8:00 PM  | 17.4 | 17.6 | 17.6 | 17.5 |
| 2022-09-20 9:00 PM  | 17.1 | 17.2 | 17.2 | 17.2 |
| 2022-09-20 10:00 PM | 16.6 | 16.7 | 16.7 | 16.7 |
| 2022-09-20 11:00 PM | 16.5 | 16.7 | 16.7 | 16.6 |
| 2022-09-21 12:00 AM | 16.5 | 16.6 | 16.6 | 16.6 |
| 2022-09-21 1:00 AM  | 16.4 | 16.5 | 16.5 | 16.4 |
| 2022-09-21 2:00 AM  | 16.2 | 16.3 | 16.3 | 16.3 |
| 2022-09-21 3:00 AM  | 16.0 | 16.0 | 16.0 | 16.0 |
| 2022-09-21 4:00 AM  | 15.7 | 15.8 | 15.8 | 15.8 |
| 2022-09-21 5:00 AM  | 15.4 | 15.6 | 15.6 | 15.5 |
| 2022-09-21 6:00 AM  | 15.1 | 15.3 | 15.3 | 15.2 |
| 2022-09-21 7:00 AM  | 14.5 | 14.7 | 14.7 | 14.6 |

|                     |      |      |      |      |
|---------------------|------|------|------|------|
| 2022-09-21 8:00 AM  | 14.0 | 14.2 | 14.2 | 14.1 |
| 2022-09-21 9:00 AM  | 13.9 | 14.1 | 14.1 | 14.0 |
| 2022-09-21 10:00 AM | 14.4 | 14.5 | 14.5 | 14.4 |
| 2022-09-21 11:00 AM | 14.7 | 14.5 | 14.5 | 14.6 |
| 2022-09-21 12:00 PM | 15.0 | 14.4 | 14.4 | 14.7 |
| 2022-09-21 1:00 PM  | 14.5 | 13.9 | 13.9 | 14.2 |
| 2022-09-21 2:00 PM  | 14.9 | 14.5 | 14.5 | 14.7 |
| 2022-09-21 3:00 PM  | 13.7 | 13.3 | 13.3 | 13.5 |
| 2022-09-21 4:00 PM  | 13.2 | 12.7 | 12.7 | 12.9 |
| 2022-09-21 5:00 PM  | 13.0 | 12.7 | 12.7 | 12.8 |
| 2022-09-21 6:00 PM  | 12.3 | 11.9 | 11.9 | 12.1 |
| 2022-09-21 7:00 PM  | 12.0 | 11.5 | 11.5 | 11.8 |
| 2022-09-21 8:00 PM  | 11.8 | 11.3 | 11.3 | 11.6 |
| 2022-09-21 9:00 PM  | 11.5 | 11.0 | 11.0 | 11.3 |
| 2022-09-21 10:00 PM | 11.5 | 11.3 | 11.3 | 11.4 |
| 2022-09-21 11:00 PM | 11.5 | 11.4 | 11.4 | 11.4 |
| 2022-09-22 12:00 AM | 11.3 | 11.3 | 11.3 | 11.3 |
| 2022-09-22 1:00 AM  | 11.0 | 10.8 | 10.8 | 10.9 |
| 2022-09-22 2:00 AM  | 10.7 | 10.1 | 10.1 | 10.4 |
| 2022-09-22 3:00 AM  | 10.4 | 10.0 | 10.0 | 10.2 |
| 2022-09-22 4:00 AM  | 9.9  | 10.1 | 10.1 | 10.0 |
| 2022-09-22 5:00 AM  | 10.0 | 9.6  | 9.6  | 9.8  |
| 2022-09-22 6:00 AM  | 10.0 | 10.0 | 10.0 | 10.0 |
| 2022-09-22 7:00 AM  | 10.1 | 9.6  | 9.6  | 9.9  |
| 2022-09-22 8:00 AM  | 9.4  | 8.7  | 8.7  | 9.0  |
| 2022-09-22 9:00 AM  | 9.2  | 8.8  | 8.8  | 9.0  |
| 2022-09-22 10:00 AM | 9.0  | 8.3  | 8.3  | 8.7  |
| 2022-09-22 11:00 AM | 9.2  | 8.5  | 8.5  | 8.8  |
| 2022-09-22 12:00 PM | 11.0 | 9.8  | 9.8  | 10.4 |
| 2022-09-22 1:00 PM  | 11.8 | 10.7 | 10.7 | 11.3 |
| 2022-09-22 2:00 PM  | 12.1 | 12.1 | 12.1 | 12.1 |
| 2022-09-22 3:00 PM  | 12.1 | 12.9 | 12.9 | 12.5 |
| 2022-09-22 4:00 PM  | 12.0 | 12.1 | 12.1 | 12.1 |
| 2022-09-22 5:00 PM  | 11.9 | 12.1 | 12.1 | 12.0 |
| 2022-09-22 6:00 PM  | 11.9 | 11.9 | 11.9 | 11.9 |
| 2022-09-22 7:00 PM  | 11.5 | 11.6 | 11.6 | 11.6 |
| 2022-09-22 8:00 PM  | 10.9 | 11.1 | 11.1 | 11.0 |
| 2022-09-22 9:00 PM  | 10.4 | 10.5 | 10.5 | 10.4 |
| 2022-09-22 10:00 PM | 9.9  | 10.1 | 10.1 | 10.0 |
| 2022-09-22 11:00 PM | 9.6  | 9.6  | 9.6  | 9.6  |
| 2022-09-23 12:00 AM | 9.0  | 9.1  | 9.1  | 9.1  |
| 2022-09-23 1:00 AM  | 8.6  | 8.8  | 8.8  | 8.7  |
| 2022-09-23 2:00 AM  | 8.4  | 8.3  | 8.3  | 8.3  |

|                     |      |      |      |      |
|---------------------|------|------|------|------|
| 2022-09-23 3:00 AM  | 8.1  | 8.0  | 8.0  | 8.1  |
| 2022-09-23 4:00 AM  | 7.9  | 7.6  | 7.6  | 7.8  |
| 2022-09-23 5:00 AM  | 7.7  | 7.3  | 7.3  | 7.5  |
| 2022-09-23 6:00 AM  | 7.4  | 7.4  | 7.4  | 7.4  |
| 2022-09-23 7:00 AM  | 7.1  | 7.2  | 7.2  | 7.1  |
| 2022-09-23 8:00 AM  | 6.8  | 6.1  | 6.1  | 6.5  |
| 2022-09-23 9:00 AM  | 6.7  | 6.7  | 6.7  | 6.7  |
| 2022-09-23 10:00 AM | 7.6  | 7.7  | 7.7  | 7.6  |
| 2022-09-23 11:00 AM | 9.3  | 9.1  | 9.1  | 9.2  |
| 2022-09-23 12:00 PM | 12.0 | 11.3 | 11.3 | 11.7 |
| 2022-09-23 1:00 PM  | 12.8 | 12.1 | 12.1 | 12.5 |
| 2022-09-23 2:00 PM  | 12.7 | 12.5 | 12.5 | 12.6 |

---
